# Supplementary material for: Epstein Barr virus genomes reveal population structure and type 1 association with endemic Burkitt lymphoma
Source: bioRxiv or medRxiv preprint supplement (doi:10.1101/689216), 2019-07-02

# Supplemental Figure 1

**A**

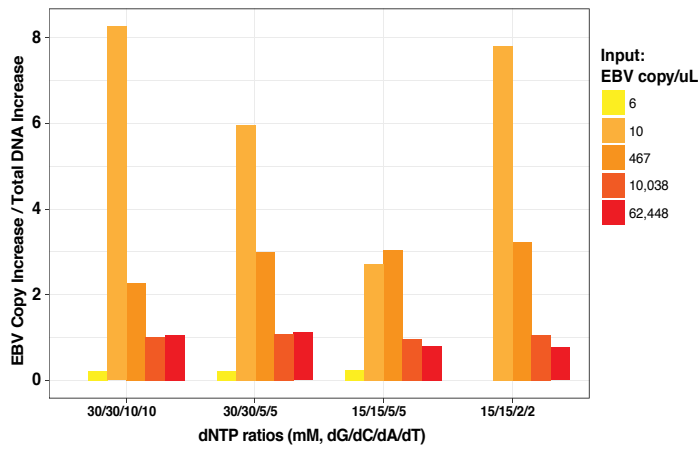

**B**

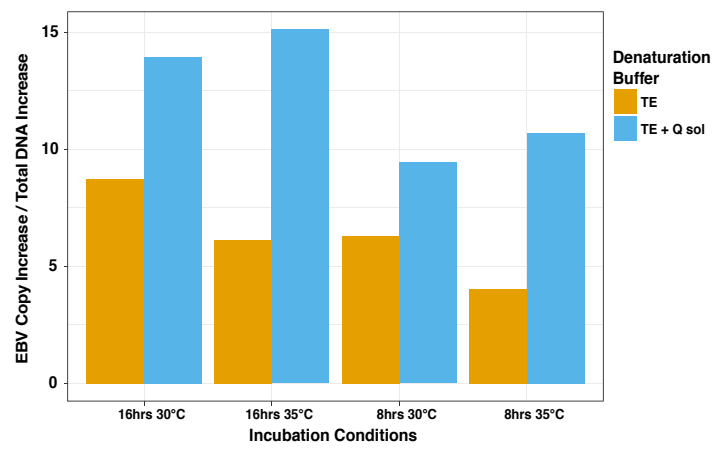

## Supplemental Figure 2

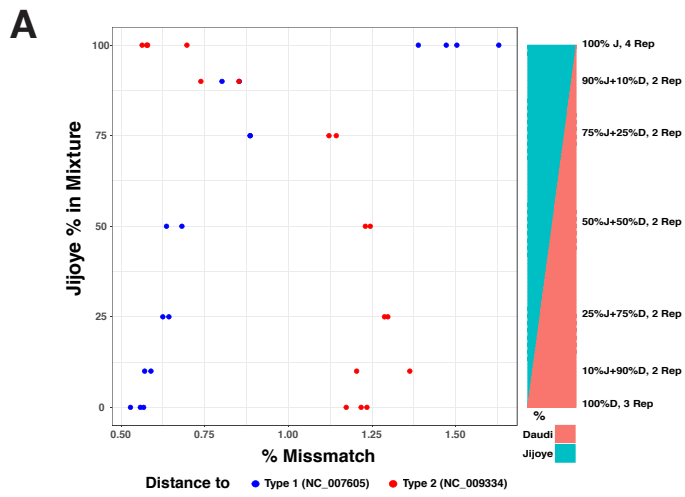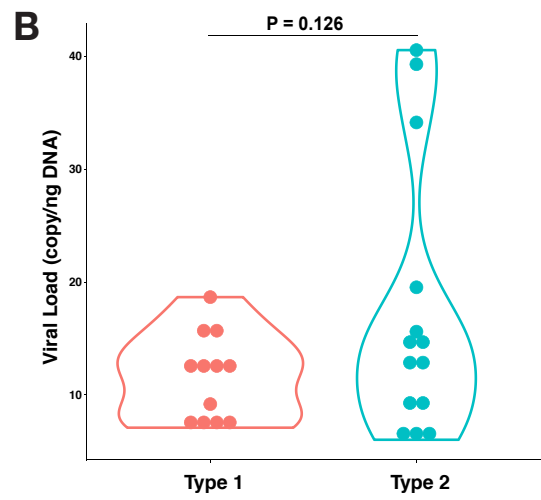

# Supplemental Figure 3

**A**

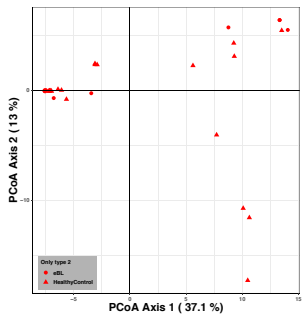

**B**

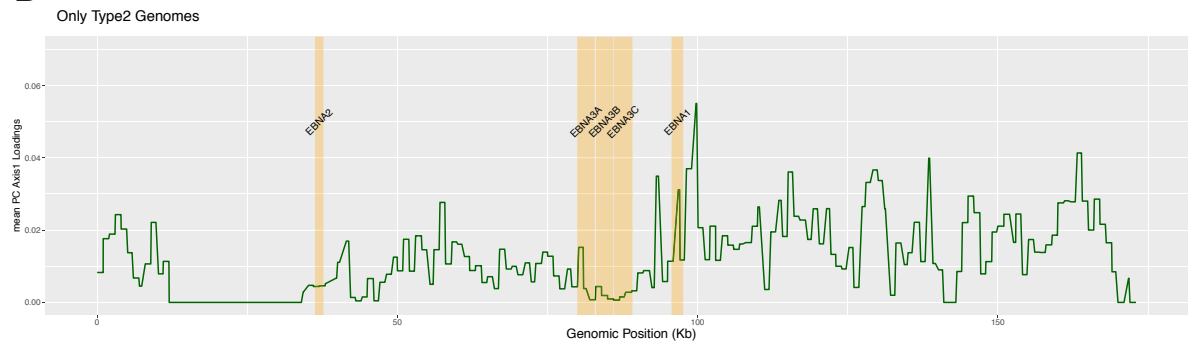



# Supplemental Figure 5

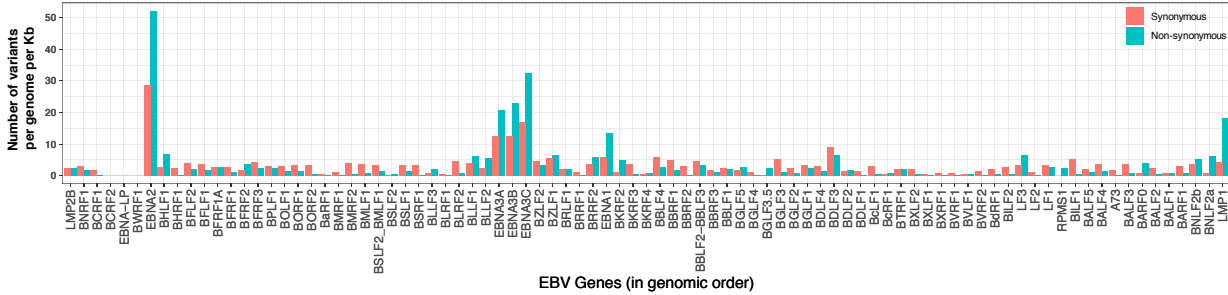

Supplemental Figure 6

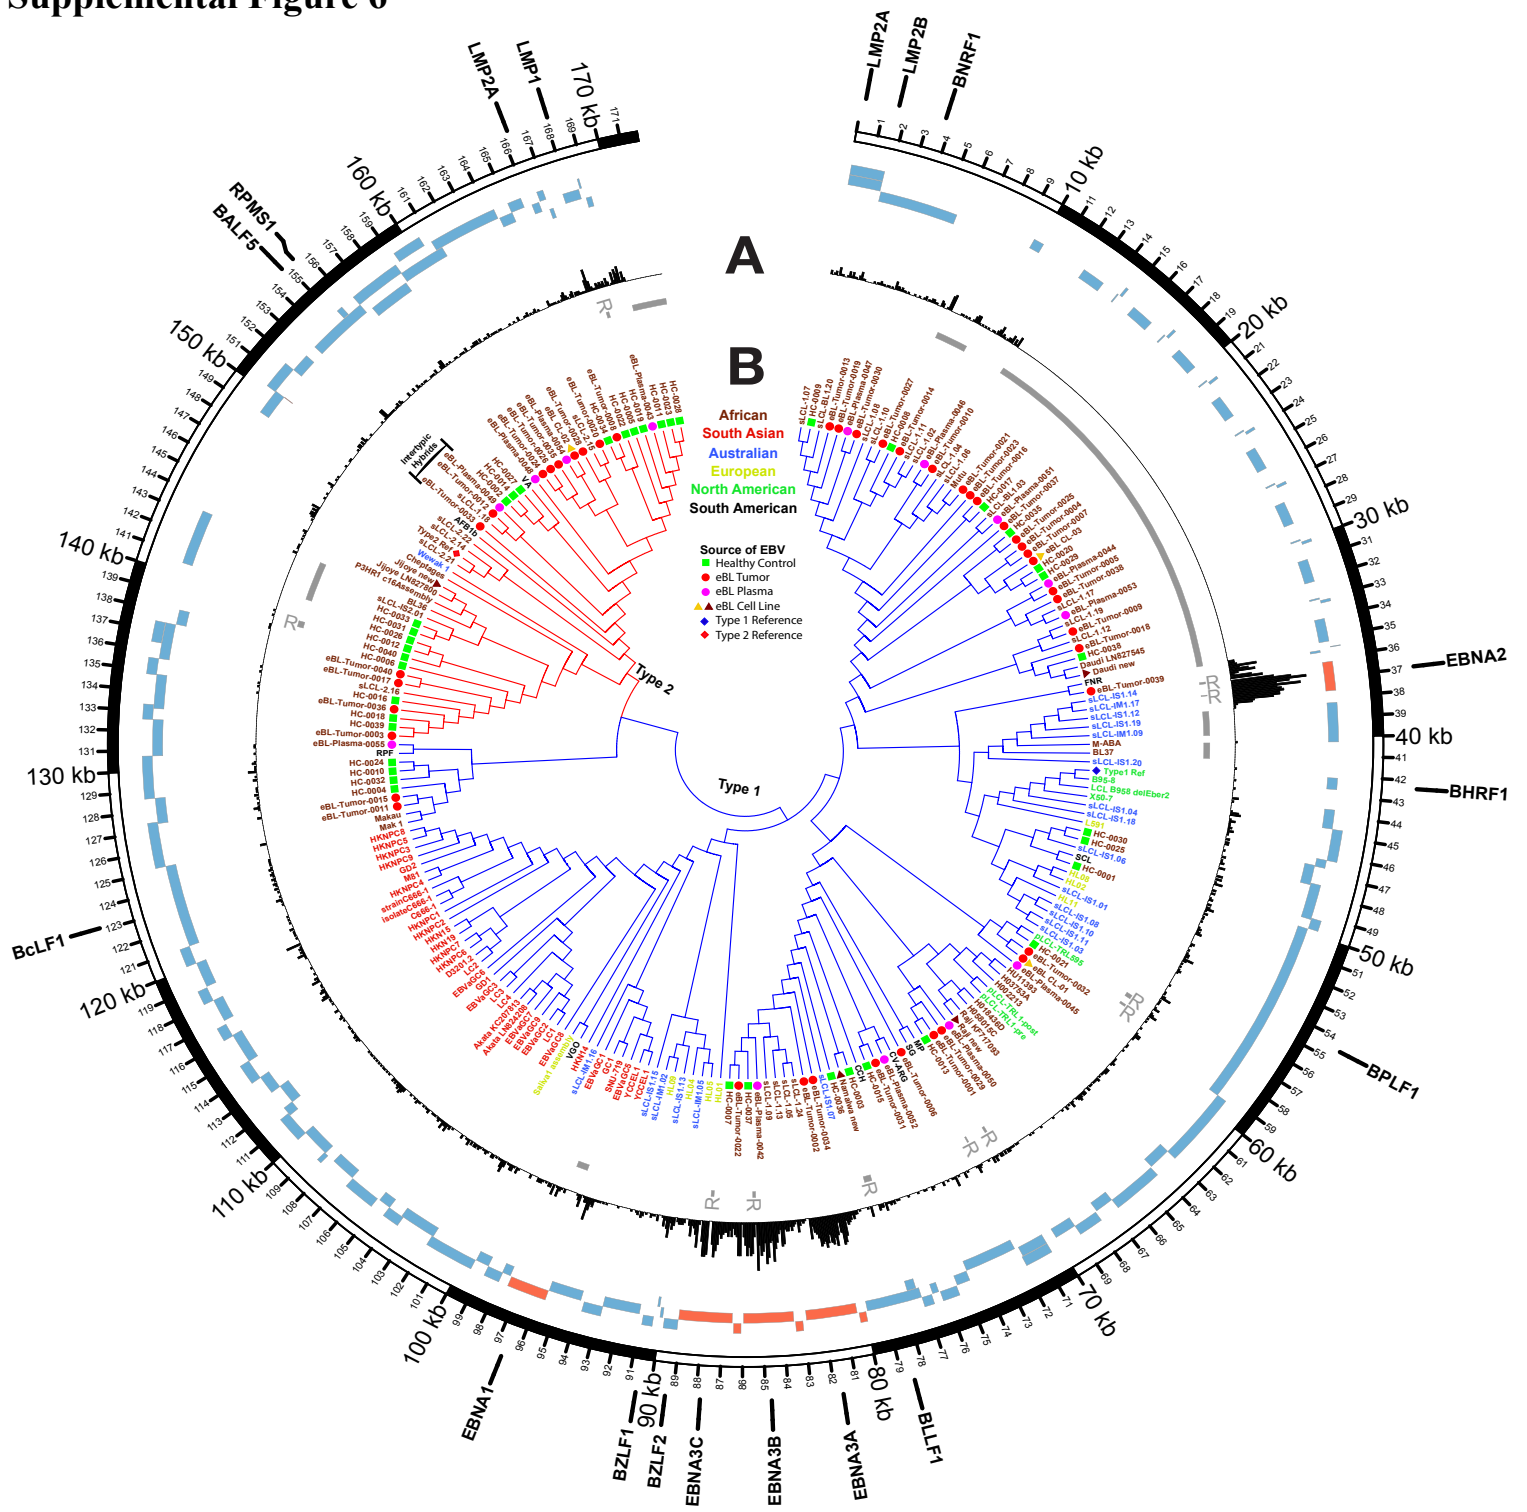



# Supplemental Figure 8

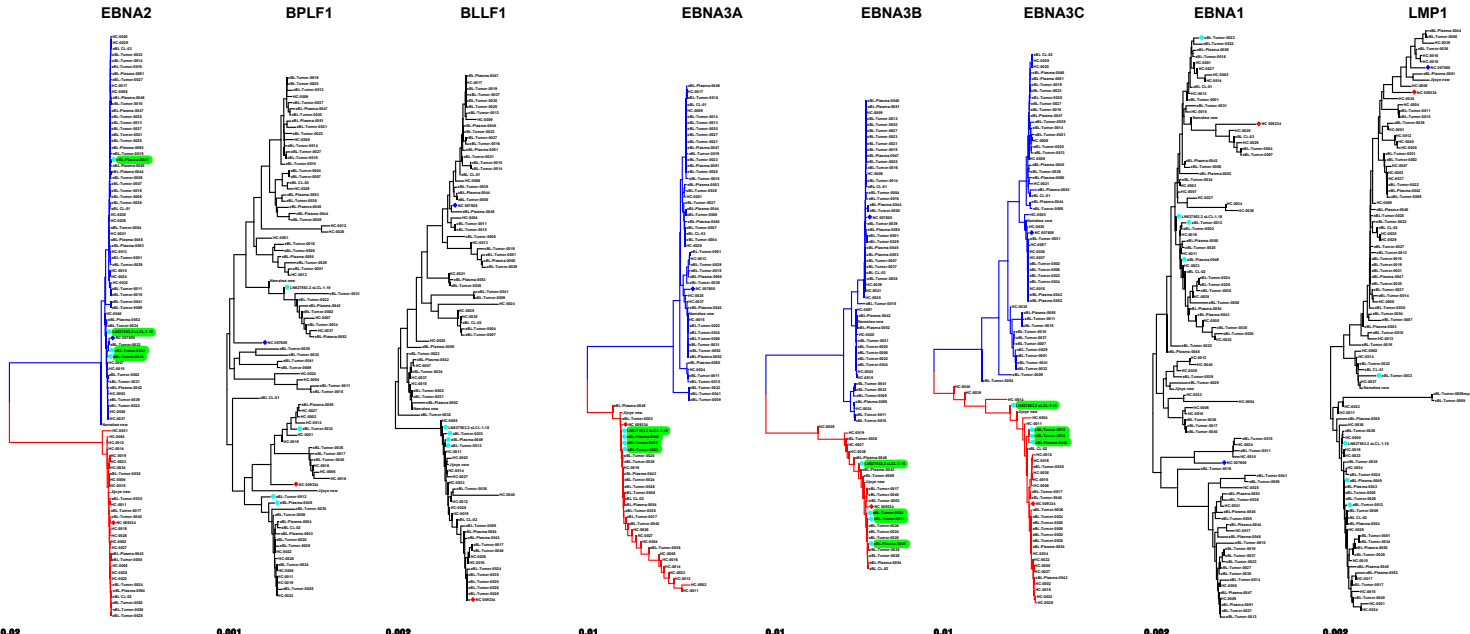

Supplement: Supplementary file [file media-2.pdf]
