# Supplementary material for: Epstein Barr virus genomes reveal population structure and type 1 association with endemic Burkitt lymphoma
Source: bioRxiv or medRxiv preprint supplement (doi:10.1101/689216), 2019-07-02
Supplement: Supplementary file [file media-3.pdf]

Supplemental Table 1. Optimization of mlrPCR-sWGA and whole genome amplification reactions.

|                                                      | EBV Input copies for sWGA*                  | Denaturation Buffer | Average EBV Input (genome copy/uL) | Average Human Input (B-actin/uL) | dNTP composition (G/C/T/A ratio) | Whole Genome Amplification Incubation | EBV DNA Output (copy/ng) | Human DNA Output (B-actin/ng) | EBV Enrichment (EBVpost / EBVpre) / (DNApost / DNApre) | Human Enrichment (Humanpost / Humanpre) / (DNApost / DNApre) | EBV Enrichment / Human Enrichment |
|------------------------------------------------------|---------------------------------------------|---------------------|------------------------------------|----------------------------------|----------------------------------|---------------------------------------|--------------------------|-------------------------------|--------------------------------------------------------|--------------------------------------------------------------|-----------------------------------|
| Input EBV copies, dNTP Composition                   | 10,000                                      | TE                  | 62,448                             | 3,456                            | 30/30/10/10                      | 16 hours at 30C                       | 4,573                    | 7                             | 1.06                                                   | 0.03                                                         | 35.33                             |
|                                                      | 1,000                                       | TE                  | 10,038                             | 13,911                           | 30/30/10/10                      | 16 hours at 30C                       | 505                      | 59                            | 1.01                                                   | 0.08                                                         | 12.63                             |
|                                                      | 100                                         | TE                  | 467                                | 10,883                           | 30/30/10/10                      | 16 hours at 30C                       | 55                       | 70                            | 2.28                                                   | 0.12                                                         | 19.00                             |
|                                                      | 10                                          | TE                  | 10                                 | 11,326                           | 30/30/10/10                      | 16 hours at 30C                       | 4                        | 68                            | 8.26                                                   | 0.12                                                         | 68.83                             |
|                                                      | 1                                           | TE                  | 6                                  | 19,483                           | 30/30/10/10                      | 16 hours at 30C                       | 0                        | 55                            | 0.21                                                   | 0.06                                                         | 3.50                              |
|                                                      | 0                                           | TE                  |                                    | 11,551                           | 30/30/10/10                      | 16 hours at 30C                       |                          | 76                            |                                                        | 0.23                                                         | 0.00                              |
|                                                      | 10,000                                      | TE                  | 62,448                             | 3,456                            | 30/30/5/5                        | 16 hours at 30C                       | 4,847                    | 2                             | 1.12                                                   | 0.01                                                         | 112.00                            |
|                                                      | 1,000                                       | TE                  | 10,038                             | 13,911                           | 30/30/5/5                        | 16 hours at 30C                       | 544                      | 75                            | 1.09                                                   | 0.11                                                         | 9.91                              |
|                                                      | 100                                         | TE                  | 467                                | 10,883                           | 30/30/5/5                        | 16 hours at 30C                       | 72                       | 65                            | 3                                                      | 0.12                                                         | 25.00                             |
|                                                      | 10                                          | TE                  | 10                                 | 11,326                           | 30/30/5/5                        | 16 hours at 30C                       | 3                        | 65                            | 5.97                                                   | 0.11                                                         | 54.27                             |
|                                                      | 1                                           | TE                  | 6                                  | 19,483                           | 30/30/5/5                        | 16 hours at 30C                       | 0                        | 81                            | 0.22                                                   | 0.09                                                         | 2.44                              |
|                                                      | 0                                           | TE                  |                                    | 11,551                           | 30/30/5/5                        | 16 hours at 30C                       |                          | 71                            |                                                        | 0.21                                                         | 0.00                              |
|                                                      | 10,000                                      | TE                  | 62,448                             | 3,456                            | 15/15/5/5                        | 16 hours at 30C                       | 3,483                    | 16                            | 0.81                                                   | 0.07                                                         | 11.57                             |
|                                                      | 1,000                                       | TE                  | 10,038                             | 13,911                           | 15/15/5/5                        | 16 hours at 30C                       | 488                      | 84                            | 0.97                                                   | 0.12                                                         | 8.08                              |
|                                                      | 100                                         | TE                  | 467                                | 10,883                           | 15/15/5/5                        | 16 hours at 30C                       | 73                       | 109                           | 3.04                                                   | 0.19                                                         | 16.00                             |
|                                                      | 10                                          | TE                  | 10                                 | 11,326                           | 15/15/5/5                        | 16 hours at 30C                       | 1                        | 80                            | 2.71                                                   | 0.14                                                         | 19.36                             |
|                                                      | 1                                           | TE                  | 6                                  | 19,483                           | 15/15/5/5                        | 16 hours at 30C                       | 0                        | 103                           | 0.25                                                   | 0.11                                                         | 2.27                              |
|                                                      | 0                                           | TE                  |                                    | 11,551                           | 15/15/5/5                        | 16 hours at 30C                       |                          | 118                           |                                                        | 0.35                                                         | 0.00                              |
|                                                      | 10,000                                      | TE                  | 62,448                             | 3,456                            | 15/15/2/2                        | 16 hours at 30C                       | 3,324                    | 12                            | 0.77                                                   | 0.05                                                         | 15.40                             |
|                                                      | 1,000                                       | TE                  | 10,038                             | 13,911                           | 15/15/2/2                        | 16 hours at 30C                       | 533                      | 77                            | 1.06                                                   | 0.11                                                         | 9.64                              |
| 100                                                  | TE                                          | 467                 | 10,883                             | 15/15/2/2                        | 16 hours at 30C                  | 78                                    | 105                      | 3.24                          | 0.19                                                   | 17.05                                                        |                                   |
| 10                                                   | TE                                          | 10                  | 11,326                             | 15/15/2/2                        | 16 hours at 30C                  | 4                                     | 105                      | 7.8                           | 0.18                                                   | 43.33                                                        |                                   |
| 1                                                    | TE                                          | 6                   | 19,483                             | 15/15/2/2                        | 16 hours at 30C                  | 0                                     | 110                      | 0                             | 0.12                                                   | 0.00                                                         |                                   |
| 0                                                    | TE                                          |                     | 11,551                             | 15/15/2/2                        | 16 hours at 30C                  |                                       | 108                      |                               | 0.32                                                   | 0.00                                                         |                                   |
| Denaturation Buffer, Incubation time and temperature | 10                                          | TE                  | 10                                 | 11,326                           | 30/30/5/5                        | 8 hours at 30C                        | 2                        | 40                            | 6.31                                                   | 0.14                                                         | 45.07                             |
|                                                      | 10                                          | TE                  | 10                                 | 11,326                           | 30/30/5/5                        | 16 hours at 30C                       | 2                        | 40                            | 8.74                                                   | 0.14                                                         | 62.43                             |
|                                                      | 10                                          | TE                  | 10                                 | 11,326                           | 30/30/5/5                        | 8 hours at 35C                        | 1                        | 22                            | 4.05                                                   | 0.08                                                         | 50.63                             |
|                                                      | 10                                          | TE                  | 10                                 | 11,326                           | 30/30/5/5                        | 16 hours at 35C                       | 2                        | 22                            | 6.14                                                   | 0.08                                                         | 76.75                             |
|                                                      | 10                                          | TE+Q sol            | 10                                 | 11,326                           | 30/30/5/5                        | 8 hours at 30C                        | 2                        | 41                            | 9.44                                                   | 0.14                                                         | 67.43                             |
|                                                      | 10                                          | TE+Q sol            | 10                                 | 11,326                           | 30/30/5/5                        | 16 hours at 30C                       | 3                        | 60                            | 13.94                                                  | 0.21                                                         | 66.38                             |
|                                                      | 10                                          | TE+Q sol            | 10                                 | 11,326                           | 30/30/5/5                        | 8 hours at 35C                        | 3                        | 28                            | 10.72                                                  | 0.1                                                          | 107.20                            |
|                                                      | 10                                          | TE+Q sol            | 10                                 | 11,326                           | 30/30/5/5                        | 16 hours at 35C                       | 4                        | 49                            | 15.13                                                  | 0.17                                                         | 89.00                             |
|                                                      | * total EBV genomes 20 uL of input for sWGA |                     |                                    |                                  |                                  |                                       |                          |                               |                                                        |                                                              |                                   |

**Supplemental Table 2. Estimated sequencing error rates based on replicates and controls.**

| Prior Amplification | Control Experimental Assembly | Reference Assembly     | Number of Substitution Errors | Number of Correct Bases | Error Rate (per base) | Mean Error Rate (per base) |
|---------------------|-------------------------------|------------------------|-------------------------------|-------------------------|-----------------------|----------------------------|
| No amplification    | Jijoye                        | Jijoye Assembly*       | 1                             | 134,118                 | 7.46E-06              | 1.13E-05                   |
| No amplification    | Daudi                         | Daudi Assembly*        | 0                             | 132,780                 | 0.00E+00              |                            |
| No amplification    | Raji_Rep1                     | Raji Assembly*         | 0                             | 130,560                 | 0.00E+00              |                            |
| No amplification    | Raji_Rep2                     | Raji Assembly*         | 5                             | 132,736                 | 3.77E-05              |                            |
| GenomiPhi-WGA       | Raji_wga                      | Raji Assembly*         | 2                             | 132,836                 | 1.51E-05              | 2.13E-05                   |
| GenomiPhi-WGA       | eBLtumor-01_EBV_type1_wga     | eBLtumor-01_EBV_type1# | 1                             | 140,069                 | 7.14E-06              |                            |
| GenomiPhi-WGA       | eBLtumor-02_EBV_type2_wga     | eBLtumor-02_EBV_type2# | 4                             | 142,932                 | 2.80E-05              |                            |
| GenomiPhi-WGA       | eBLtumor-03_EBV_type2_wga     | eBLtumor-03_EBV_type2# | 1                             | 142,154                 | 7.03E-06              |                            |
| GenomiPhi-WGA       | eBLtumor-04_EBV_type1_wga     | eBLtumor-04_EBV_type1# | 5                             | 141,643                 | 3.53E-05              |                            |
| GenomiPhi-WGA       | eBLtumor-05_EBV_type1_wga     | eBLtumor-05_EBV_type1# | 5                             | 141,643                 | 3.53E-05              | 1.09E-04                   |
| mlrPCR-sWGA         | Raji_Rep1_mlrPCR-sWGA         | Raji Assembly*         | 6                             | 98,507                  | 6.09E-05              |                            |
| mlrPCR-sWGA         | Raji_Rep2_mlrPCR-sWGA         | Raji Assembly*         | 11                            | 130,538                 | 8.43E-05              |                            |
| mlrPCR-sWGA         | Jijoye_Rep1_mlrPCR-sWGA       | Jijoye Assembly*       | 13                            | 132,045                 | 9.84E-05              |                            |
| mlrPCR-sWGA         | Daudi_mlrPCR-sWGA             | Daudi Assembly*        | 25                            | 130,160                 | 1.92E-04              |                            |

\*Reference assemblies from Palser et al. 2015 (Jijoye: LN827800, Daudi: LN827545, Raji: KF717093). #The isolates were sequenced without any amplification. Preprocess denotes whether sample DNA was amplified prior to sequencing library preparation. The number of substitutions were determined by pairwise whole genome alignments of control and reference assemblies. Error rates were referred to the average mismatches to reference assemblies after normalizing to total covered genomic regions. GenomiPhi-WGA; whole genome amplification using EBV specific protected hexamers, mlrPCR-sWGA; pre-amplification with PCR primer pools followed by sWGA.

Supplemental Table 3. Sample attributes, preprocessing information, and their sequencing data statistics.

| SampleID  | Sample Source           | Amplification    | Capture Method             | Viral Type | Illumina Paired-end Read Length | Total Sequence reads | Assembled Genome Size (bases) | Average Depth of Coverage over Assembly |
|-----------|-------------------------|------------------|----------------------------|------------|---------------------------------|----------------------|-------------------------------|-----------------------------------------|
| eBL_CL-01 | New BL_CellLineDNA      | No amplification | EBV specific MyBait oligos | Type1      | 300                             | 27728                | 137836                        | 60.3                                    |
| eBL_CL-02 | New BL_CellLineDNA      | No amplification | EBV specific MyBait oligos | Type2      | 300                             | 37293                | 140684                        | 79.5                                    |
| eBL_CL-03 | New BL_CellLineDNA      | No amplification | EBV specific MyBait oligos | Type1      | 300                             | 130447               | 142246                        | 275.1                                   |
| Daudi     | BL_CellLineDNA          | No amplification | EBV specific MyBait oligos | Type1      | 300                             | 114210               | 138211                        | 247.9                                   |
| Jijoye    | BL_CellLineDNA          | No amplification | EBV specific MyBait oligos | Type2      | 300                             | 15094                | 138424                        | 32.7                                    |
| Namalwa   | BL_CellLineDNA          | No amplification | EBV specific MyBait oligos | Type1      | 300                             | 29866                | 131405                        | 68.2                                    |
| Raji      | BL_CellLineDNA          | No amplification | EBV specific MyBait oligos | Type1      | 300                             | 16399                | 135972                        | 36.2                                    |
| HC-0001   | BloodDNA_fromHealthyKid | mIrrPCR-sWGA     | EBV specific MyBait oligos | Type1      | 300                             | 1989031              | 92740                         | 6434.2                                  |
| HC-0002   | BloodDNA_fromHealthyKid | mIrrPCR-sWGA     | EBV specific MyBait oligos | Type2      | 300                             | 2573344              | 135457                        | 5699.2                                  |
| HC-0003   | BloodDNA_fromHealthyKid | mIrrPCR-sWGA     | EBV specific MyBait oligos | Type1      | 300                             | 3256865              | 101378                        | 9637.8                                  |
| HC-0004   | BloodDNA_fromHealthyKid | mIrrPCR-sWGA     | EBV specific MyBait oligos | Type2      | 300                             | 6191128              | 130528                        | 14229.4                                 |
| HC-0005   | BloodDNA_fromHealthyKid | mIrrPCR-sWGA     | EBV specific MyBait oligos | Type2      | 300                             | 2230574              | 130100                        | 5143.5                                  |
| HC-0006   | BloodDNA_fromHealthyKid | mIrrPCR-sWGA     | EBV specific MyBait oligos | Type2      | 300                             | 14005054             | 113876                        | 36895.5                                 |
| HC-0007   | BloodDNA_fromHealthyKid | mIrrPCR-sWGA     | EBV specific MyBait oligos | Type1      | 300                             | 13554411             | 125967                        | 32280.9                                 |
| HC-0008   | BloodDNA_fromHealthyKid | mIrrPCR-sWGA     | EBV specific MyBait oligos | Type1      | 300                             | 4038485              | 112717                        | 10748.6                                 |
| HC-0009   | BloodDNA_fromHealthyKid | mIrrPCR-sWGA     | EBV specific MyBait oligos | Type1      | 300                             | 5264476              | 132675                        | 11903.8                                 |
| HC-0010   | BloodDNA_fromHealthyKid | mIrrPCR-sWGA     | EBV specific MyBait oligos | Type1      | 300                             | 5080095              | 91925                         | 16579                                   |
| HC-0011   | BloodDNA_fromHealthyKid | mIrrPCR-sWGA     | EBV specific MyBait oligos | Type2      | 300                             | 2361855              | 114610                        | 6182.3                                  |
| HC-0012   | BloodDNA_fromHealthyKid | mIrrPCR-sWGA     | EBV specific MyBait oligos | Type2      | 300                             | 4609922              | 114898                        | 12036.6                                 |
| HC-0013   | BloodDNA_fromHealthyKid | mIrrPCR-sWGA     | EBV specific MyBait oligos | Type1      | 300                             | 399047               | 104101                        | 1150                                    |
| HC-0014   | BloodDNA_fromHealthyKid | mIrrPCR-sWGA     | EBV specific MyBait oligos | Type2      | 300                             | 1373086              | 123167                        | 3344.4                                  |
| HC-0015   | BloodDNA_fromHealthyKid | mIrrPCR-sWGA     | EBV specific MyBait oligos | Type1      | 300                             | 3517550              | 128859                        | 8189.3                                  |
| HC-0016   | BloodDNA_fromHealthyKid | mIrrPCR-sWGA     | EBV specific MyBait oligos | Type2      | 300                             | 5312268              | 131404                        | 12128.1                                 |
| HC-0017   | BloodDNA_fromHealthyKid | mIrrPCR-sWGA     | EBV specific MyBait oligos | Type1      | 300                             | 1194255              | 89724                         | 3993.1                                  |
| HC-0018   | BloodDNA_fromHealthyKid | mIrrPCR-sWGA     | EBV specific MyBait oligos | Type2      | 300                             | 3443411              | 85526                         | 12078.5                                 |
| HC-0019   | BloodDNA_fromHealthyKid | mIrrPCR-sWGA     | EBV specific MyBait oligos | Type2      | 300                             | 1401820              | 137320                        | 3062.5                                  |
| HC-0020   | BloodDNA_fromHealthyKid | mIrrPCR-sWGA     | EBV specific MyBait oligos | Type1      | 300                             | 3297486              | 97564                         | 10139.5                                 |
| HC-0021   | BloodDNA_fromHealthyKid | mIrrPCR-sWGA     | EBV specific MyBait oligos | Type1      | 300                             | 1691945              | 110989                        | 4573.3                                  |
| HC-0022   | BloodDNA_fromHealthyKid | mIrrPCR-sWGA     | EBV specific MyBait oligos | Type2      | 300                             | 986623               | 120580                        | 2454.7                                  |
| HC-0023   | BloodDNA_fromHealthyKid | mIrrPCR-sWGA     | EBV specific MyBait oligos | Type2      | 300                             | 149295               | 132533                        | 337.9                                   |
| HC-0024   | BloodDNA_fromHealthyKid | mIrrPCR-sWGA     | EBV specific MyBait oligos | Type1      | 300                             | 1248198              | 128373                        | 2917                                    |
| HC-0025   | BloodDNA_fromHealthyKid | mIrrPCR-sWGA     | EBV specific MyBait oligos | Type1      | 300                             | 1179837              | 82870                         | 4271.2                                  |
| HC-0026   | BloodDNA_fromHealthyKid | mIrrPCR-sWGA     | EBV specific MyBait oligos | Type2      | 300                             | 555072               | 137682                        | 1209.5                                  |
| HC-0027   | BloodDNA_fromHealthyKid | mIrrPCR-sWGA     | EBV specific MyBait oligos | Type2      | 300                             | 457153               | 136835                        | 1002.3                                  |
| HC-0028   | BloodDNA_fromHealthyKid | mIrrPCR-sWGA     | EBV specific MyBait oligos | Type2      | 300                             | 1910804              | 129668                        | 4420.8                                  |
| HC-0029   | BloodDNA_fromHealthyKid | mIrrPCR-sWGA     | EBV specific MyBait oligos | Type1      | 300                             | 8132282              | 138631                        | 17598.4                                 |
| HC-0030   | BloodDNA_fromHealthyKid | mIrrPCR-sWGA     | EBV specific MyBait oligos | Type1      | 150                             | 514390               | 89660                         | 860.6                                   |
| HC-0031   | BloodDNA_fromHealthyKid | mIrrPCR-sWGA     | EBV specific MyBait oligos | Type2      | 150                             | 896398               | 15578                         | 8631.4                                  |

|                |                         |                  |                            |             |           |          |        |         |                               |  |
|----------------|-------------------------|------------------|----------------------------|-------------|-----------|----------|--------|---------|-------------------------------|--|
| HC-0032        | BloodDNA_fromHealthyKid | mlrPCR-sWGA      | EBV specific MyBait oligos | Type1       | 150       | 1230192  | 59837  | 3083.9  |                               |  |
| HC-0033        | BloodDNA_fromHealthyKid | mlrPCR-sWGA      | EBV specific MyBait oligos | Type2       | 150       | 331520   | 16212  | 3067.4  |                               |  |
| HC-0034        | BloodDNA_fromHealthyKid | mlrPCR-sWGA      | EBV specific MyBait oligos | Type2       | 150       | 11241210 | 97685  | 17261.4 |                               |  |
| HC-0035        | BloodDNA_fromHealthyKid | mlrPCR-sWGA      | EBV specific MyBait oligos | Type1       | 150       | 24810    | 77012  | 48.3    |                               |  |
| HC-0036        | BloodDNA_fromHealthyKid | mlrPCR-sWGA      | EBV specific MyBait oligos | Type1       | 150       | 3822180  | 57343  | 9998.2  |                               |  |
| HC-0037        | BloodDNA_fromHealthyKid | mlrPCR-sWGA      | EBV specific MyBait oligos | Type1       | 150       | 41852    | 108638 | 57.8    |                               |  |
| HC-0038        | BloodDNA_fromHealthyKid | mlrPCR-sWGA      | EBV specific MyBait oligos | Type2       | 150       | 107808   | 3440   | 4700.9  |                               |  |
| HC-0039        | BloodDNA_fromHealthyKid | mlrPCR-sWGA      | EBV specific MyBait oligos | Type2       | 150       | 1028620  | 47534  | 3246    |                               |  |
| HC-0040        | BloodDNA_fromHealthyKid | mlrPCR-sWGA      | EBV specific MyBait oligos | Type2       | 150       | 9429614  | 111687 | 12664.3 |                               |  |
| eBL-Tumor-0001 | eBL_primaryTumorDNA     | GenomiPhi-WGA    | EBV specific MyBait oligos | Type1       | 200 & 300 | 4222227  | 142384 | 7413.5  |                               |  |
| eBL-Tumor-0002 | eBL_primaryTumorDNA     | GenomiPhi-WGA    | EBV specific MyBait oligos | Type1       | 200 & 300 | 6479721  | 142052 | 11403.8 |                               |  |
| eBL-Tumor-0003 | eBL_primaryTumorDNA     | GenomiPhi-WGA    | EBV specific MyBait oligos | Type2       | 200 & 300 | 8625903  | 60909  | 35404.9 |                               |  |
| eBL-Tumor-0004 | eBL_primaryTumorDNA     | mlrPCR-sWGA      | EBV specific MyBait oligos | Type1       | 300       | 1123872  | 137537 | 2451.4  |                               |  |
| eBL-Tumor-0005 | eBL_primaryTumorDNA     | GenomiPhi-WGA    | EBV specific MyBait oligos | Type1       | 200 & 300 | 4648123  | 142405 | 8160    |                               |  |
| eBL-Tumor-0006 | eBL_primaryTumorDNA     | GenomiPhi-WGA    | EBV specific MyBait oligos | Type1       | 200 & 300 | 6448397  | 143731 | 11216.1 |                               |  |
| eBL-Tumor-0007 | eBL_primaryTumorDNA     | GenomiPhi-WGA    | EBV specific MyBait oligos | Type1       | 200 & 300 | 5448856  | 142866 | 9534.9  |                               |  |
| eBL-Tumor-0008 | eBL_primaryTumorDNA     | mlrPCR-sWGA      | EBV specific MyBait oligos | Type2       | 300       | 10438253 | 141842 | 22077.2 |                               |  |
| eBL-Tumor-0009 | eBL_primaryTumorDNA     | mlrPCR-sWGA      | EBV specific MyBait oligos | Type1       | 300       | 926150   | 136703 | 2032.5  |                               |  |
| eBL-Tumor-0010 | eBL_primaryTumorDNA     | mlrPCR-sWGA      | EBV specific MyBait oligos | Type1       | 300       | 21509972 | 135211 | 47725.3 |                               |  |
| eBL-Tumor-0011 | eBL_primaryTumorDNA     | GenomiPhi-WGA    | EBV specific MyBait oligos | Type1       | 200 & 300 | 14949732 | 144063 | 25943   |                               |  |
| eBL-Tumor-0012 | eBL_primaryTumorDNA     | GenomiPhi-WGA    | EBV specific MyBait oligos | Inter-typic | 200 & 300 | 3673227  | 141985 | 6467.6  |                               |  |
| eBL-Tumor-0013 | eBL_primaryTumorDNA     | GenomiPhi-WGA    | EBV specific MyBait oligos | Type1       | 200 & 300 | 7861933  | 144125 | 13637.4 |                               |  |
| eBL-Tumor-0014 | eBL_primaryTumorDNA     | GenomiPhi-WGA    | EBV specific MyBait oligos | Type1       | 200 & 300 | 8701944  | 143606 | 15149   |                               |  |
| eBL-Tumor-0015 | eBL_primaryTumorDNA     | GenomiPhi-WGA    | EBV specific MyBait oligos | Type1       | 200 & 300 | 5825147  | 144044 | 10110   |                               |  |
| eBL-Tumor-0016 | eBL_primaryTumorDNA     | GenomiPhi-WGA    | EBV specific MyBait oligos | Type1       | 200 & 300 | 1161216  | 139661 | 2078.6  |                               |  |
| eBL-Tumor-0017 | eBL_primaryTumorDNA     | No amplification | EBV specific MyBait oligos | Type2       | 200       | 10699217 | 145418 | 14715.1 |                               |  |
| eBL-Tumor-0018 | eBL_primaryTumorDNA     | No amplification | EBV specific MyBait oligos | Type1       | 200       | 11258545 | 143781 | 15660.7 |                               |  |
| eBL-Tumor-0019 | eBL_primaryTumorDNA     | No amplification | EBV specific MyBait oligos | Type1       | 200       | 16192472 | 143175 | 22619.1 |                               |  |
| eBL-Tumor-0020 | eBL_primaryTumorDNA     | No amplification | EBV specific MyBait oligos | Type2       | 200       | 14633495 | 146920 | 19920.4 |                               |  |
| eBL-Tumor-0021 | eBL_primaryTumorDNA     | No amplification | EBV specific MyBait oligos | Type1       | 200       | 14430586 | 143942 | 20050.6 |                               |  |
| eBL-Tumor-0022 | eBL_primaryTumorDNA     | No amplification | EBV specific MyBait oligos | Type1       | 200       | 7687200  | 143947 | 10680.6 |                               |  |
| eBL-Tumor-0022 | eBL_primaryTumorDNA     | GenomiPhi-WGA    | EBV specific MyBait oligos | Type1       | 200       | 7248781  | 142454 | 10177   | Repeated for error estimation |  |
| eBL-Tumor-0023 | eBL_primaryTumorDNA     | No amplification | EBV specific MyBait oligos | Type1       | 200       | 4481944  | 140842 | 6364.5  |                               |  |
| eBL-Tumor-0024 | eBL_primaryTumorDNA     | No amplification | EBV specific MyBait oligos | Type2       | 200       | 2585251  | 143612 | 3600.3  |                               |  |
| eBL-Tumor-0024 | eBL_primaryTumorDNA     | GenomiPhi-WGA    | EBV specific MyBait oligos | Type2       | 200       | 4883458  | 142754 | 6841.8  | Repeated for error estimation |  |
| eBL-Tumor-0025 | eBL_primaryTumorDNA     | No amplification | EBV specific MyBait oligos | Type1       | 200       | 9775107  | 143175 | 13654.8 |                               |  |
| eBL-Tumor-0026 | eBL_primaryTumorDNA     | No amplification | EBV specific MyBait oligos | Type2       | 200       | 4070074  | 142949 | 5694.4  |                               |  |
| eBL-Tumor-0026 | eBL_primaryTumorDNA     | GenomiPhi-WGA    | EBV specific MyBait oligos | Type2       | 200       | 6415050  | 142375 | 9011.5  | Repeated for error estimation |  |
| eBL-Tumor-0027 | eBL_primaryTumorDNA     | No amplification | EBV specific MyBait oligos | Type1       | 200       | 2473450  | 142313 | 3476.1  |                               |  |
| eBL-Tumor-0028 | eBL_primaryTumorDNA     | No amplification | EBV specific MyBait oligos | Type2       | 200       | 2785996  | 142423 | 3912.3  |                               |  |
| eBL-Tumor-0029 | eBL_primaryTumorDNA     | No amplification | EBV specific MyBait oligos | Type1       | 200       | 7602074  | 142738 | 10651.8 |                               |  |
| eBL-Tumor-0030 | eBL_primaryTumorDNA     | No amplification | EBV specific MyBait oligos | Type1       | 200       | 6079669  | 145541 | 8354.6  |                               |  |

|                 |                         |                  |                            |             |           |          |        |          |                               |
|-----------------|-------------------------|------------------|----------------------------|-------------|-----------|----------|--------|----------|-------------------------------|
| eBL-Tumor-0031  | eBL_primaryTumorDNA     | No amplification | EBV specific MyBait oligos | Type1       | 200       | 3972963  | 126974 | 6257.9   |                               |
| eBL-Tumor-0032  | eBL_primaryTumorDNA     | No amplification | EBV specific MyBait oligos | Type1       | 200       | 7118274  | 144616 | 9844.4   |                               |
| eBL-Tumor-0033  | eBL_primaryTumorDNA     | No amplification | EBV specific MyBait oligos | Inter-typic | 200       | 18395334 | 146197 | 25165.1  |                               |
| eBL-Tumor-0034  | eBL_primaryTumorDNA     | No amplification | EBV specific MyBait oligos | Type1       | 200       | 5679398  | 144524 | 7859.5   |                               |
| eBL-Tumor-0035  | eBL_primaryTumorDNA     | GenomiPhi-WGA    | EBV specific MyBait oligos | Type2       | 200 & 300 | 6133367  | 142874 | 10732.1  |                               |
| eBL-Tumor-0036  | eBL_primaryTumorDNA     | mlrPCR-sWGA      | EBV specific MyBait oligos | Type2       | 300       | 1873678  | 137887 | 4076.6   |                               |
| eBL-Tumor-0037  | eBL_primaryTumorDNA     | No amplification | EBV specific MyBait oligos | Type1       | 200       | 4781768  | 143452 | 6666.7   |                               |
| eBL-Tumor-0037  | eBL_primaryTumorDNA     | GenomiPhi-WGA    | EBV specific MyBait oligos | Type1       | 200       | 4097748  | 141698 | 5783.8   | Repeated for error estimation |
| eBL-Tumor-0038  | eBL_primaryTumorDNA     | No amplification | EBV specific MyBait oligos | Type1       | 200       | 1652556  | 141363 | 2338     |                               |
| eBL-Tumor-0038  | eBL_primaryTumorDNA     | GenomiPhi-WGA    | EBV specific MyBait oligos | Type1       | 200 & 300 | 14668183 | 144437 | 25388.5  | Repeated for error estimation |
| eBL-Tumor-0039  | eBL_primaryTumorDNA     | No amplification | EBV specific MyBait oligos | Type1       | 200       | 3484138  | 145453 | 4790.7   |                               |
| eBL-Tumor-0040  | eBL_primaryTumorDNA     | No amplification | EBV specific MyBait oligos | Type2       | 200       | 3758609  | 145880 | 5153     |                               |
| eBL-Tumor-0041  | eBL_primaryTumorDNA     | No amplification | EBV specific MyBait oligos | Type1       | 200       | 6158191  | 145025 | 8492.6   |                               |
| eBL-Plasma-0035 | PlasmaDNA_fromBLpatient | mlrPCR-sWGA      | EBV specific MyBait oligos | Type2       | 300       | 385303   | 131409 | 879.6    |                               |
| eBL-Plasma-0036 | PlasmaDNA_fromBLpatient | mlrPCR-sWGA      | EBV specific MyBait oligos | Type2       | 300       | 727755   | 139446 | 1565.7   |                               |
| eBL-Plasma-0037 | PlasmaDNA_fromBLpatient | mlrPCR-sWGA      | EBV specific MyBait oligos | Type1       | 300       | 52615528 | 125217 | 126058.4 |                               |
| eBL-Plasma-0038 | PlasmaDNA_fromBLpatient | mlrPCR-sWGA      | EBV specific MyBait oligos | Type1       | 300       | 2982299  | 135347 | 6610.3   |                               |
| eBL-Plasma-0039 | PlasmaDNA_fromBLpatient | mlrPCR-sWGA      | EBV specific MyBait oligos | Type1       | 300       | 2834853  | 135720 | 6266.3   |                               |
| eBL-Plasma-0040 | PlasmaDNA_fromBLpatient | mlrPCR-sWGA      | EBV specific MyBait oligos | Type2       | 300       | 336725   | 138187 | 731      |                               |
| eBL-Plasma-0041 | PlasmaDNA_fromBLpatient | mlrPCR-sWGA      | EBV specific MyBait oligos | Type1       | 300       | 1055728  | 112128 | 2824.6   |                               |
| eBL-Plasma-0042 | PlasmaDNA_fromBLpatient | mlrPCR-sWGA      | EBV specific MyBait oligos | Type1       | 300       | 1226736  | 138256 | 2661.9   |                               |
| eBL-Plasma-0043 | PlasmaDNA_fromBLpatient | mlrPCR-sWGA      | EBV specific MyBait oligos | Type2       | 300       | 643566   | 137788 | 1401.2   |                               |
| eBL-Plasma-0044 | PlasmaDNA_fromBLpatient | mlrPCR-sWGA      | EBV specific MyBait oligos | Type1       | 300       | 992336   | 137048 | 2172.2   |                               |
| eBL-Plasma-0045 | PlasmaDNA_fromBLpatient | mlrPCR-sWGA      | EBV specific MyBait oligos | Type1       | 300       | 9600176  | 138091 | 20856.2  |                               |
| eBL-Plasma-0046 | PlasmaDNA_fromBLpatient | mlrPCR-sWGA      | EBV specific MyBait oligos | Type1       | 300       | 7416764  | 112949 | 19699.4  |                               |
| eBL-Plasma-0047 | PlasmaDNA_fromBLpatient | No amplification | EBV specific MyBait oligos | Type1       | 300       | 2209552  | 141331 | 4690.2   |                               |
| eBL-Plasma-0048 | PlasmaDNA_fromBLpatient | No amplification | EBV specific MyBait oligos | Type2       | 300       | 117683   | 125628 | 281      |                               |
| eBL-Plasma-0049 | PlasmaDNA_fromBLpatient | No amplification | EBV specific MyBait oligos | Inter-typic | 300       | 352588   | 136504 | 774.9    |                               |
| eBL-Plasma-0050 | PlasmaDNA_fromBLpatient | No amplification | EBV specific MyBait oligos | Type1       | 300       | 528192   | 138955 | 1140.4   |                               |
| eBL-Plasma-0051 | PlasmaDNA_fromBLpatient | No amplification | EBV specific MyBait oligos | Type1       | 300       | 6039246  | 142313 | 12730.9  |                               |
| eBL-Plasma-0052 | PlasmaDNA_fromBLpatient | mlrPCR-sWGA      | EBV specific MyBait oligos | Type1       | 300       | 1682856  | 138645 | 3641.4   |                               |
| eBL-Plasma-0053 | PlasmaDNA_fromBLpatient | mlrPCR-sWGA      | EBV specific MyBait oligos | Type1       | 300       | 9207274  | 135925 | 20321.4  |                               |
| eBL-Plasma-0054 | PlasmaDNA_fromBLpatient | No amplification | EBV specific MyBait oligos | Type2       | 300       | 1063382  | 142801 | 2234     |                               |
| eBL-Plasma-0055 | PlasmaDNA_fromBLpatient | No amplification | EBV specific MyBait oligos | Type1       | 300       | 1514583  | 142029 | 3199.2   |                               |

| <b>Supplemental Table 4. EBV genomes previously published and used for comparison.</b> |                                                                                                |
|----------------------------------------------------------------------------------------|------------------------------------------------------------------------------------------------|
| <b>Sample</b>                                                                          | <b>NCBI sequence ID</b>                                                                        |
| LC1                                                                                    | gi 1034220039 gb KT823506.1  Human herpesvirus 4 isolate LC1, partial genome                   |
| LC2                                                                                    | gi 1034220119 gb KT823507.1  Human herpesvirus 4 isolate LC2, partial genome                   |
| LC3                                                                                    | gi 1034220201 gb KT823508.1  Human herpesvirus 4 isolate LC3, partial genome                   |
| LC4                                                                                    | gi 1034220278 gb KT823509.1  Human herpesvirus 4 isolate LC4, partial genome                   |
| Type2_Ref                                                                              | gi 139424470 ref NC_009334.1  Human herpesvirus 4, complete genome                             |
| GD2                                                                                    | gi 343177302 gb HQ020558.1  Human herpesvirus 4 strain GD2, complete genome                    |
| Akata                                                                                  | gi 428161017 gb KC207813.1  Human herpesvirus 4 strain Akata, complete genome                  |
| Mutu                                                                                   | gi 428161102 gb KC207814.1  Human herpesvirus 4 strain Mutu, complete genome                   |
| strainC666-1                                                                           | gi 500154724 gb KC617875.1  Human herpesvirus 4 strain C666-1, partial genome                  |
| M81                                                                                    | gi 557368242 gb KF373730.1  Human herpesvirus 4 strain M81, complete genome                    |
| HKNPC1                                                                                 | gi 582051068 gb JQ009376.2  Human herpesvirus 4 strain HKNPC1, genome                          |
| HKNPC2                                                                                 | gi 663082492 gb KF992564.1  Human herpesvirus 4 isolate HKNPC2, partial genome                 |
| HKNPC3                                                                                 | gi 663082571 gb KF992565.1  Human herpesvirus 4 isolate HKNPC3, partial genome                 |
| HKNPC4                                                                                 | gi 663082648 gb KF992566.1  Human herpesvirus 4 isolate HKNPC4, partial genome                 |
| HKNPC5                                                                                 | gi 663082725 gb KF992567.1  Human herpesvirus 4 isolate HKNPC5, partial genome                 |
| HKNPC6                                                                                 | gi 663082802 gb KF992568.1  Human herpesvirus 4 isolate HKNPC6, partial genome                 |
| HKNPC7                                                                                 | gi 663082879 gb KF992569.1  Human herpesvirus 4 isolate HKNPC7, partial genome                 |
| HKNPC8                                                                                 | gi 663082958 gb KF992570.1  Human herpesvirus 4 isolate HKNPC8, partial genome                 |
| HKNPC9                                                                                 | gi 663083037 gb KF992571.1  Human herpesvirus 4 isolate HKNPC9, partial genome                 |
| isolateC666-1                                                                          | gi 663083114 gb KJ411974.1  Human herpesvirus 4 isolate C666-1, partial genome                 |
| Raji                                                                                   | gi 681961025 gb KF717093.1  Human herpesvirus 4 strain Raji, complete genome                   |
| Saliva1_assembly                                                                       | gi 764007273 emb LN824142.1  Human herpesvirus 4 genome assembly Saliva1_assembly, segment : I |
| Mak_1                                                                                  | gi 764007353 emb LN824203.1  Human herpesvirus 4 genome assembly Mak_1, segment : I            |
| HL05                                                                                   | gi 764007436 emb LN824204.1  Human herpesvirus 4 genome assembly HL05, segment : I             |

|                |                                                                                             |
|----------------|---------------------------------------------------------------------------------------------|
| sLCL-1.12      | gi 764007519 emb LN824205.1  Human herpesvirus 4 genome assembly sLCL-1.12, segment : I     |
| pLCL-TRL1-post | gi 764007602 emb LN824206.1  Human herpesvirus 4 genome assembly pLCL-TRL1-post             |
| pLCL-TRL1-pre  | gi 764007685 emb LN824207.1  Human herpesvirus 4 genome assembly pLCL-TRL1-pre, segment : I |
| Akata_Rep      | gi 764007768 emb LN824208.1  Human herpesvirus 4 genome assembly Akata, segment : I         |
| HKN14          | gi 764007851 emb LN824209.1  Human herpesvirus 4 genome assembly HKN14, segment : I         |
| HKN19          | gi 764007935 emb LN824224.1  Human herpesvirus 4 genome assembly HKN19, segment : I         |
| HL08           | gi 764008018 emb LN824225.1  Human herpesvirus 4 genome assembly HL08, segment : I          |
| HL01           | gi 764008102 emb LN824226.1  Human herpesvirus 4 genome assembly HL01, segment : I          |
| HL09           | gi 764008186 emb LN827522.1  Human herpesvirus 4 genome assembly HL09, segment : I          |
| L591           | gi 764008270 emb LN827523.1  Human herpesvirus 4 genome assembly L591, segment : I          |
| HL11           | gi 764008352 emb LN827524.1  Human herpesvirus 4 genome assembly HL11, segment : I          |
| C666-1         | gi 764008436 emb LN827525.1  Human herpesvirus 4 genome assembly C666-1, segment : I        |
| BL37           | gi 764008516 emb LN827526.1  Human herpesvirus 4 genome assembly BL37, segment : I          |
| M-ABA          | gi 764008600 emb LN827527.1  Human herpesvirus 4 genome assembly M-ABA, segment : I         |
| Wewak_1        | gi 764008683 emb LN827544.1  Human herpesvirus 4 genome assembly Wewak_1, segment : I       |
| Daudi          | gi 764008767 emb LN827545.1  Human herpesvirus 4 genome assembly Daudi, segment : I         |
| HL02           | gi 764008849 emb LN827546.1  Human herpesvirus 4 genome assembly HL02, segment : I          |
| HKN15          | gi 764008933 emb LN827547.1  Human herpesvirus 4 genome assembly HKN15, segment : I         |
| D3201.2        | gi 764009101 emb LN827549.1  Human herpesvirus 4 genome assembly D3201.2, segment : I       |
| sLCL-1.11      | gi 764009185 emb LN827550.1  Human herpesvirus 4 genome assembly sLCL-1.11, segment : I     |
| Makau          | gi 764009268 emb LN827551.1  Human herpesvirus 4 genome assembly Makau, segment : I         |
| sLCL-1.08      | gi 764009351 emb LN827552.1  Human herpesvirus 4 genome assembly sLCL-1.08, segment : I     |
| sLCL-IS1.08    | gi 764009435 emb LN827553.1  Human herpesvirus 4 genome assembly sLCL-IS1.08, segment : I   |
| AFB1b          | gi 764009519 emb LN827554.1  Human herpesvirus 4 genome assembly AFB1b, segment : I         |
| X50-7          | gi 764009602 emb LN827555.1  Human herpesvirus 4 genome assembly X50-7, segment : I         |
| Cheptages      | gi 764009684 emb LN827556.1  Human herpesvirus 4 genome assembly Cheptages, segment : I     |
| sLCL-1.02      | gi 764009848 emb LN827558.1  Human herpesvirus 4 genome assembly sLCL-1.02, segment : I     |

|             |                                                                                              |
|-------------|----------------------------------------------------------------------------------------------|
| pLCL-TRL595 | gi 764009931 emb LN827559.1  Human herpesvirus 4 genome assembly pLCL-TRL595, segment : I    |
| sLCL-2.14   | gi 764010014 emb LN827560.1  Human herpesvirus 4 genome assembly sLCL-2.14, segment : I      |
| YCCEL1      | gi 764010098 emb LN827561.1  Human herpesvirus 4 genome assembly YCCEL1, segment : I         |
| sLCL-1.19   | gi 764010182 emb LN827562.1  Human herpesvirus 4 genome assembly sLCL-1.19, segment : I      |
| HL04        | gi 764010348 emb LN827564.1  Human herpesvirus 4 genome assembly HL04, segment : I           |
| sLCL-1.07   | gi 764010420 emb LN827565.1  Human herpesvirus 4 genome assembly sLCL-1.07, segment : I      |
| sLCL-1.06   | gi 764010504 emb LN827566.1  Human herpesvirus 4 genome assembly sLCL-1.06, segment : I      |
| sLCL-IM1.09 | gi 764010588 emb LN827567.1  Human herpesvirus 4 genome assembly sLCL-IM1.09, segment : I    |
| sLCL-1.24   | gi 764010672 emb LN827568.1  Human herpesvirus 4 genome assembly sLCL-1.24, segment : I      |
| sLCL-IS1.11 | gi 764010755 emb LN827569.1  Human herpesvirus 4 genome assembly sLCL-IS1.11, segment : I    |
| sLCL-IS1.01 | gi 764010839 emb LN827570.1  Human herpesvirus 4 genome assembly sLCL-IS1.01, segment : I    |
| sLCL-BL1.20 | gi 764010923 emb LN827571.1  Human herpesvirus 4 genome assembly sLCL-BL1.20, segment : I    |
| sLCL-IS1.18 | gi 764011007 emb LN827572.1  Human herpesvirus 4 genome assembly sLCL-IS1.18, segment : I    |
| sLCL-1.10   | gi 764011091 emb LN827573.1  Human herpesvirus 4 genome assembly sLCL-1.10, segment : I      |
| sLCL-1.09   | gi 764011175 emb LN827574.1  Human herpesvirus 4 genome assembly sLCL-1.09, segment : I      |
| sLCL-IS1.14 | gi 764011258 emb LN827575.1  Human herpesvirus 4 genome assembly sLCL-IS1.14, segment : I    |
| sLCL-IS1.20 | gi 764011341 emb LN827576.1  Human herpesvirus 4 genome assembly sLCL-IS1.20, segment : I    |
| sLCL-1.17   | gi 764011424 emb LN827577.1  Human herpesvirus 4 genome assembly sLCL-1.17, segment : I      |
| sLCL-IS1.13 | gi 764011508 emb LN827578.1  Human herpesvirus 4 genome assembly sLCL-IS1.13, chromosome : I |
| sLCL-1.13   | gi 764011592 emb LN827579.1  Human herpesvirus 4 genome assembly sLCL-1.13, segment : I      |
| sLCL-2.16   | gi 764011675 emb LN827580.1  Human herpesvirus 4 genome assembly sLCL-2.16, segment : I      |
| sLCL-1.05   | gi 764011759 emb LN827581.1  Human herpesvirus 4 genome assembly sLCL-1.05, segment : I      |
| sLCL-BL1.03 | gi 764011842 emb LN827582.1  Human herpesvirus 4 genome assembly sLCL-BL1.03, segment : I    |
| sLCL-IM1.17 | gi 764011926 emb LN827583.1  Human herpesvirus 4 genome assembly sLCL-IM1.17, segment : I    |
| sLCL-IS1.06 | gi 764012009 emb LN827584.1  Human herpesvirus 4 genome assembly sLCL-IS1.06, segment : I    |
| sLCL-1.04   | gi 764012093 emb LN827585.1  Human herpesvirus 4 genome assembly sLCL-1.04, segment : I      |
| sLCL-IS1.15 | gi 764012177 emb LN827586.1  Human herpesvirus 4 genome assembly sLCL-IS1.15, segment : I    |



|                   |                                                                                                  |
|-------------------|--------------------------------------------------------------------------------------------------|
| sLCL-2.21         | gi 764012261 emb LN827587.1  Human herpesvirus 4 genome assembly sLCL-2.21, segment : I          |
| sLCL-IS1.19       | gi 764012345 emb LN827588.1  Human herpesvirus 4 genome assembly sLCL-IS1.19, segment : I        |
| sLCL-IS2.01       | gi 764012428 emb LN827589.1  Human herpesvirus 4 genome assembly sLCL-IS2.01, segment : I        |
| sLCL-IM1.05       | gi 764012512 emb LN827590.1  Human herpesvirus 4 genome assembly sLCL-IM1.05, segment : I        |
| sLCL-2.15         | gi 764012596 emb LN827591.1  Human herpesvirus 4 genome assembly sLCL-2.15, segment : I          |
| sLCL-IS1.10       | gi 764012680 emb LN827592.1  Human herpesvirus 4 genome assembly sLCL-IS1.10, segment : I        |
| sLCL-IS1.12       | gi 764012764 emb LN827593.1  Human herpesvirus 4 genome assembly sLCL-IS1.12, segment : I        |
| sLCL-IS1.07       | gi 764012847 emb LN827594.1  Human herpesvirus 4 genome assembly sLCL-IS1.07, segment : I        |
| sLCL-IS1.03       | gi 764012930 emb LN827595.1  Human herpesvirus 4 genome assembly sLCL-IS1.03, segment : I        |
| sLCL-IM1.02       | gi 764013014 emb LN827596.1  Human herpesvirus 4 genome assembly sLCL-IM1.02, segment : I        |
| sLCL-IS1.04       | gi 764013098 emb LN827597.1  Human herpesvirus 4 genome assembly sLCL-IS1.04, segment : I        |
| LCL_B958_delEber2 | gi 765364814 emb LN827739.1  Human herpesvirus 4 genome assembly LCL_B958_delEber2, segment : I  |
| sLCL-IM1.16       | gi 766540480 emb LN827799.1  Human herpesvirus 4 genome assembly sLCL-IM1.16, segment : I        |
| Jijoye            | gi 766540564 emb LN827800.1  Human herpesvirus 4 genome assembly Jijoye, segment : I             |
| CCH               | gi 787749988 gb KP968257.1  Human herpesvirus 4 strain CCH, partial genome                       |
| MP                | gi 787750086 gb KP968258.1  Human herpesvirus 4 strain MP, partial genome                        |
| SCL               | gi 787750199 gb KP968259.1  Human herpesvirus 4 strain SCL, partial genome                       |
| VGO               | gi 787750302 gb KP968260.1  Human herpesvirus 4 strain VGO, partial genome                       |
| HU11393           | gi 787750415 gb KP968261.1  Human herpesvirus 4 strain HU11393, partial genome                   |
| H018436D          | gi 787750520 gb KP968262.1  Human herpesvirus 4 strain H018436D, partial genome                  |
| H058015C          | gi 787750634 gb KP968263.1  Human herpesvirus 4 strain H058015C, partial genome                  |
| H002213           | gi 787750783 gb KP968264.1  Human herpesvirus 4 strain H002213, partial genome                   |
| P3HR1_c16Assembly | gi 802130350 emb LN827548.2  Human herpesvirus 4 genome assembly P3HR1_c16 Assembly, segment : I |
| BL36              | gi 802130370 emb LN827557.2  Human herpesvirus 4 genome assembly BL36, segment : I               |
| sLCL-1.18         | gi 802130391 emb LN827563.2  Human herpesvirus 4 genome assembly sLCL-1.18, segment : I          |
| sLCL-2.22         | gi 809279182 emb LN831023.1  Human herpesvirus 4 genome assembly sLCL-2.22, segment : I          |
| GC1               | gi 810056545 gb KP735248.1  Human herpesvirus 4 strain GC1, complete genome                      |

|           |                                                                                        |  |
|-----------|----------------------------------------------------------------------------------------|--|
| Type1_Ref | gi 82503188 ref NC_007605.1  Human herpesvirus 4 complete wild type genome             |  |
| GD1       | gi 84519641 gb AY961628.3  Human herpesvirus 4 strain GD1, complete genome             |  |
| B95-8     | gi 94734074 emb V01555.2  Epstein-Barr virus (EBV) genome, strain B95-8                |  |
| H03753A   | gi 957760599 gb KR063342.1  Human herpesvirus 4 strain H03753A, partial genome         |  |
| CV-ARG    | gi 957760676 gb KR063343.1  Human herpesvirus 4 strain CV-ARG, partial genome          |  |
| RPF       | gi 957760753 gb KR063344.1  Human herpesvirus 4 strain RPF, partial genome             |  |
| FNR       | gi 957760829 gb KR063345.1  Human herpesvirus 4 strain FNR, partial genome             |  |
| VA        | gi 957760989 gb KT001102.1  Human herpesvirus 4 strain VA, partial genome              |  |
| SG        | gi 957761062 gb KT001103.1  Human herpesvirus 4 strain SG, partial genome              |  |
| EBVaGC3   | gi 961527962 gb KT254013.1  Human herpesvirus 4 isolate EBVaGC3, partial genome        |  |
| EBVaGC1   | gi 971835372 gb KT273942.1  Human herpesvirus 4 isolate EBVaGC1, partial genome        |  |
| EBVaGC2   | gi 971835443 gb KT273943.1  Human herpesvirus 4 isolate EBVaGC2, partial genome        |  |
| EBVaGC5   | gi 971835583 gb KT273945.1  Human herpesvirus 4 isolate EBVaGC5, partial genome        |  |
| EBVaGC6   | gi 971835652 gb KT273946.1  Human herpesvirus 4 isolate EBVaGC6, partial genome        |  |
| EBVaGC7   | gi 971835723 gb KT273947.1  Human herpesvirus 4 isolate EBVaGC7, partial genome        |  |
| EBVaGC8   | gi 971835791 gb KT273948.1  Human herpesvirus 4 isolate EBVaGC8, partial genome        |  |
| EBVaGC9   | gi 971835862 gb KT273949.1  Human herpesvirus 4 isolate EBVaGC9, partial genome        |  |
| SNU-719   | gi 995891043 dbj AP015015.1  Human herpesvirus 4 DNA, complete genome, strain: SNU-719 |  |
| YCCEL1    | gi 995891127 dbj AP015016.1  Human herpesvirus 4 DNA, complete genome, strain: YCCEL1  |  |

Supplemental Table 5. Full list of single nucleotide variant association results with significance cut off P &gt; 0.01.

| EBV genomic variant positions significantly associated with eBL cases in comparison to healthy control individuals. Test <b>With</b> EBV type stratification:    |          |     |     |      |      |      |      |             |           |               |          |          |          |       |       |       |
|------------------------------------------------------------------------------------------------------------------------------------------------------------------|----------|-----|-----|------|------|------|------|-------------|-----------|---------------|----------|----------|----------|-------|-------|-------|
| chrom                                                                                                                                                            | position | REF | ALT | MINA | MINU | OBSA | OBSU | P           | OR        | VarAAposition | VarType  | RefCodon | VarCodon | RefAA | VarAA | Gene  |
| NC_007605                                                                                                                                                        | 37668    | T   | C   | 2    | 24   | 36   | 54   | 0.000328    | 0.1       | 485           | nonsynon | TCC      | CCC      | S     | P     | BYRF1 |
| NC_007605                                                                                                                                                        | 95773    | A   | T   | 11   | 3    | 36   | 57   | 0.001322    | 6.67213   | 38            | nonsynon | AAC      | TAC      | N     | Y     | BKRF1 |
| NC_007605                                                                                                                                                        | 95778    | T   | G   | 12   | 3    | 37   | 57   | 0.000538999 | 7.16129   | 39            | nonsynon | CAT      | CAG      | H     | Q     | BKRF1 |
| NC_007605                                                                                                                                                        | 124703   | T   | G   | 7    | 1    | 34   | 56   | 0.003178    | 12.7377   | 159           | nonsynon | AAG      | ACG      | K     | T     | BcLF1 |
| NC_007605                                                                                                                                                        | 124709   | G   | A   | 7    | 1    | 34   | 56   | 0.003092    | 12.7377   | 157           | nonsynon | GCT      | GTT      | A     | V     | BcLF1 |
| NC_007605                                                                                                                                                        | 165131   | T   | C   | 10   | 36   | 36   | 57   | 0.004082    | 0.349462  | 29            | nonsynon | GTC      | GCC      | V     | A     | BARF1 |
| EBV genomic variant positions significantly associated with eBL cases in comparison to healthy control individuals. Test <b>Without</b> EBV type stratification: |          |     |     |      |      |      |      |             |           |               |          |          |          |       |       |       |
| chrom                                                                                                                                                            | position | REF | ALT | MINA | MINU | OBSA | OBSU | P           | OR        | VarAAposition | VarType  | RefCodon | VarCodon | RefAA | VarAA | Gene  |
| NC_007605                                                                                                                                                        | 1868     | C   | T   | 2    | 17   | 35   | 56   | 0.00516199  | 0.16436   | 45            | nonsynon | CCA      | TCA      | P     | S     | BNRF1 |
| NC_007605                                                                                                                                                        | 36226    | T   | A   | 0    | 10   | 34   | 55   | 0.00878399  | 0.0698644 | 4             | nonsynon | TTC      | TAC      | F     | Y     | BYRF1 |
| NC_007605                                                                                                                                                        | 36627    | A   | C   | 18   | 12   | 37   | 53   | 0.00956499  | 2.51786   | 138           | nonsynon | AAT      | CAT      | N     | H     | BYRF1 |
| NC_007605                                                                                                                                                        | 36629    | T   | A   | 18   | 12   | 37   | 53   | 0.00950499  | 2.51786   | 138           | nonsynon | AAT      | AAA      | N     | K     | BYRF1 |
| NC_007605                                                                                                                                                        | 36633    | A   | C   | 18   | 12   | 37   | 53   | 0.00945799  | 2.51786   | 140           | nonsynon | ATT      | CTT      | I     | L     | BYRF1 |
| NC_007605                                                                                                                                                        | 36636    | G   | C   | 18   | 12   | 37   | 53   | 0.00955999  | 2.51786   | 141           | nonsynon | GTA      | CTA      | V     | L     | BYRF1 |
| NC_007605                                                                                                                                                        | 36642    | C   | A   | 18   | 12   | 37   | 53   | 0.00948099  | 2.51786   | 143           | nonsynon | CAA      | AAA      | Q     | K     | BYRF1 |
| NC_007605                                                                                                                                                        | 36644    | A   | C   | 18   | 12   | 37   | 53   | 0.00951899  | 2.51786   | 143           | nonsynon | CAA      | CAC      | Q     | H     | BYRF1 |
| NC_007605                                                                                                                                                        | 36645    | T   | G   | 18   | 12   | 37   | 53   | 0.00955999  | 2.51786   | 144           | nonsynon | TCA      | GCA      | S     | A     | BYRF1 |
| NC_007605                                                                                                                                                        | 36669    | T   | A   | 18   | 12   | 37   | 53   | 0.00953299  | 2.51786   | 152           | nonsynon | TTG      | ATG      | L     | M     | BYRF1 |
| NC_007605                                                                                                                                                        | 36670    | T   | G   | 18   | 12   | 37   | 53   | 0.00952199  | 2.51786   | 152           | nonsynon | TTG      | TGG      | L     | W     | BYRF1 |
| NC_007605                                                                                                                                                        | 36880    | C   | A   | 18   | 12   | 36   | 53   | 0.00876299  | 2.61111   | 222           | nonsynon | ACT      | AAT      | T     | N     | BYRF1 |
| NC_007605                                                                                                                                                        | 36883    | T   | A   | 18   | 13   | 36   | 54   | 0.00979399  | 2.4359    | 223           | nonsynon | CTG      | CAG      | L     | Q     | BYRF1 |
| NC_007605                                                                                                                                                        | 36888    | C   | G   | 18   | 13   | 36   | 54   | 0.00977199  | 2.4359    | 225           | nonsynon | CCC      | GCC      | P     | A     | BYRF1 |
| NC_007605                                                                                                                                                        | 36894    | C   | A   | 18   | 13   | 36   | 54   | 0.00984699  | 2.4359    | 227           | nonsynon | CCA      | ACA      | P     | T     | BYRF1 |
| NC_007605                                                                                                                                                        | 36898    | T   | C   | 18   | 13   | 36   | 54   | 0.00982999  | 2.4359    | 228           | nonsynon | CTA      | CCA      | L     | P     | BYRF1 |
| NC_007605                                                                                                                                                        | 36901    | T   | C   | 18   | 13   | 36   | 54   | 0.00984299  | 2.4359    | 229           | nonsynon | CTC      | CCC      | L     | P     | BYRF1 |

|           |       |   |   |    |    |    |    |            |           |     |          |     |     |   |   |        |
|-----------|-------|---|---|----|----|----|----|------------|-----------|-----|----------|-----|-----|---|---|--------|
| NC_007605 | 36907 | T | C | 18 | 13 | 36 | 54 | 0.00975699 | 2.4359    | 231 | nonsynon | GTA | GCA | V | A | BYRF1  |
| NC_007605 | 36910 | T | C | 18 | 13 | 36 | 54 | 0.00980199 | 2.4359    | 232 | nonsynon | CTA | CCA | L | P | BYRF1  |
| NC_007605 | 37074 | C | T | 17 | 12 | 35 | 54 | 0.00825199 | 2.56604   | 287 | nonsynon | CCT | TCT | P | S | BYRF1  |
| NC_007605 | 37086 | C | T | 17 | 12 | 35 | 54 | 0.00820199 | 2.56604   | 291 | nonsynon | CCC | TCC | P | S | BYRF1  |
| NC_007605 | 37124 | G | C | 17 | 12 | 35 | 54 | 0.00829799 | 2.56604   | 303 | nonsynon | CAG | CAC | Q | H | BYRF1  |
| NC_007605 | 37206 | C | A | 17 | 13 | 34 | 55 | 0.00883099 | 2.48718   | 331 | nonsynon | CCG | ACG | P | T | BYRF1  |
| NC_007605 | 37210 | A | C | 17 | 13 | 34 | 55 | 0.00882999 | 2.48718   | 332 | nonsynon | CAA | CCA | Q | P | BYRF1  |
| NC_007605 | 37212 | C | A | 17 | 13 | 34 | 55 | 0.00899699 | 2.48718   | 333 | nonsynon | CCC | ACC | P | T | BYRF1  |
| NC_007605 | 37245 | A | G | 17 | 12 | 34 | 53 | 0.00769299 | 2.61111   | 344 | nonsynon | AGC | GGC | S | G | BYRF1  |
| NC_007605 | 37249 | G | A | 17 | 12 | 34 | 53 | 0.00769599 | 2.61111   | 345 | nonsynon | AGG | AAG | R | K | BYRF1  |
| NC_007605 | 37462 | A | C | 18 | 12 | 37 | 53 | 0.00932399 | 2.51786   | 416 | nonsynon | CAC | CCC | H | P | BYRF1  |
| NC_007605 | 37479 | G | A | 18 | 12 | 37 | 54 | 0.00935899 | 2.57143   | 422 | nonsynon | GTT | ATT | V | I | BYRF1  |
| NC_007605 | 37515 | C | G | 18 | 12 | 37 | 54 | 0.00935399 | 2.57143   | 434 | nonsynon | CCA | GCA | P | A | BYRF1  |
| NC_007605 | 37516 | C | A | 18 | 12 | 37 | 54 | 0.00928499 | 2.57143   | 434 | nonsynon | CCA | CAA | P | Q | BYRF1  |
| NC_007605 | 37521 | G | C | 18 | 12 | 37 | 54 | 0.00942099 | 2.57143   | 436 | nonsynon | GCT | CCT | A | P | BYRF1  |
| NC_007605 | 37560 | A | T | 18 | 12 | 37 | 53 | 0.00942999 | 2.51786   | 449 | nonsynon | ATA | TTA | I | L | BYRF1  |
| NC_007605 | 37668 | T | C | 2  | 24 | 36 | 54 | 6.30E-05   | 0.1       | 485 | nonsynon | TCC | CCC | S | P | BYRF1  |
| NC_007605 | 57209 | C | G | 5  | 23 | 38 | 57 | 0.004096   | 0.278628  | 677 | nonsynon | GAG | GAC | E | D | BPLF1  |
| NC_007605 | 57333 | G | A | 5  | 23 | 37 | 57 | 0.004228   | 0.286704  | 636 | nonsynon | CCA | CTA | P | L | BPLF1  |
| NC_007605 | 59221 | C | T | 4  | 0  | 36 | 58 | 0.00979199 | 15.3066   | 7   | nonsynon | GGG | AGG | G | R | BPLF1  |
| NC_007605 | 59230 | C | T | 4  | 21 | 37 | 58 | 0.00581599 | 0.258503  | 4   | nonsynon | GGC | AGC | G | S | BPLF1  |
| NC_007605 | 64132 | G | A | 10 | 33 | 34 | 57 | 0.00713199 | 0.423197  | 5   | nonsynon | AGT | AAT | S | N | BORF2  |
| NC_007605 | 72849 | G | T | 3  | 0  | 16 | 53 | 0.00531599 | 25.2712   | 582 | nonsynon | CCT | CAT | P | H | BSLF1  |
| NC_007605 | 73309 | C | T | 3  | 0  | 18 | 55 | 0.00638299 | 23.0896   | 429 | nonsynon | GCA | ACA | A | T | BSLF1  |
| NC_007605 | 85291 | C | T | 8  | 14 | 12 | 54 | 0.00807599 | 3.35714   | 717 | nonsynon | CCT | TCT | P | S | EBNA3B |
| NC_007605 | 85877 | C | A | 0  | 13 | 32 | 57 | 0.002436   | 0.0582831 | 912 | nonsynon | GCT | GAT | A | D | EBNA3B |
| NC_007605 | 86101 | C | G | 18 | 16 | 30 | 55 | 0.00623499 | 2.51786   | 7   | nonsynon | CAG | GAG | Q | E | EBNA3C |
| NC_007605 | 86114 | G | T | 18 | 16 | 29 | 55 | 0.003552   | 2.64375   | 11  | nonsynon | AGA | ATA | R | I | EBNA3C |
| NC_007605 | 86132 | A | C | 18 | 16 | 30 | 55 | 0.00619199 | 2.51786   | 17  | nonsynon | GAG | GCG | E | A | EBNA3C |
| NC_007605 | 86153 | C | A | 18 | 15 | 29 | 54 | 0.003453   | 2.79      | 24  | nonsynon | ACT | AAT | T | N | EBNA3C |

|           |       |   |   |    |    |    |    |            |         |     |          |     |     |   |   |        |
|-----------|-------|---|---|----|----|----|----|------------|---------|-----|----------|-----|-----|---|---|--------|
| NC_007605 | 86167 | G | A | 18 | 15 | 30 | 54 | 0.003837   | 2.65714 | 29  | nonsynon | GAT | AAT | D | N | EBNA3C |
| NC_007605 | 86168 | A | T | 18 | 15 | 30 | 54 | 0.003826   | 2.65714 | 29  | nonsynon | GAT | GTT | D | V | EBNA3C |
| NC_007605 | 86191 | C | T | 18 | 15 | 30 | 54 | 0.003793   | 2.65714 | 37  | nonsynon | CCA | TCA | P | S | EBNA3C |
| NC_007605 | 86194 | T | A | 18 | 15 | 30 | 54 | 0.003827   | 2.65714 | 38  | nonsynon | TCC | ACC | S | T | EBNA3C |
| NC_007605 | 86197 | A | G | 18 | 15 | 30 | 54 | 0.003815   | 2.65714 | 39  | nonsynon | AGT | GGT | S | G | EBNA3C |
| NC_007605 | 86222 | C | A | 18 | 15 | 29 | 54 | 0.00341    | 2.79    | 47  | nonsynon | CCA | CAA | P | Q | EBNA3C |
| NC_007605 | 86224 | G | A | 18 | 15 | 29 | 54 | 0.003435   | 2.79    | 48  | nonsynon | GAA | AAA | E | K | EBNA3C |
| NC_007605 | 86226 | A | C | 18 | 15 | 29 | 54 | 0.003494   | 2.79    | 48  | nonsynon | GAA | GAC | E | D | EBNA3C |
| NC_007605 | 86230 | T | C | 18 | 15 | 29 | 54 | 0.003445   | 2.79    | 50  | nonsynon | TCA | CCA | S | P | EBNA3C |
| NC_007605 | 86251 | C | T | 18 | 15 | 29 | 54 | 0.003432   | 2.79    | 57  | nonsynon | CCT | TCT | P | S | EBNA3C |
| NC_007605 | 86254 | T | C | 18 | 15 | 29 | 54 | 0.003442   | 2.79    | 58  | nonsynon | TGG | CGG | W | R | EBNA3C |
| NC_007605 | 86265 | C | A | 18 | 16 | 29 | 55 | 0.003616   | 2.64375 | 61  | nonsynon | AGC | AGA | S | R | EBNA3C |
| NC_007605 | 86689 | A | G | 18 | 16 | 30 | 57 | 0.003895   | 2.625   | 178 | nonsynon | CAA | CGA | Q | R | EBNA3C |
| NC_007605 | 86697 | C | T | 17 | 16 | 29 | 57 | 0.00698299 | 2.53963 | 181 | nonsynon | CCC | TCC | P | S | EBNA3C |
| NC_007605 | 86839 | C | T | 17 | 17 | 29 | 57 | 0.00815199 | 2.36585 | 228 | nonsynon | ACA | ATA | T | I | EBNA3C |
| NC_007605 | 86848 | A | C | 18 | 17 | 30 | 57 | 0.00832999 | 2.44538 | 231 | nonsynon | CAT | CCT | H | P | EBNA3C |
| NC_007605 | 86938 | A | T | 18 | 17 | 31 | 57 | 0.00909499 | 2.33422 | 261 | nonsynon | TAT | TTT | Y | F | EBNA3C |
| NC_007605 | 86973 | A | G | 19 | 16 | 31 | 57 | 0.002155   | 2.7064  | 273 | nonsynon | ATC | GTC | I | V | EBNA3C |
| NC_007605 | 87052 | A | G | 18 | 17 | 30 | 56 | 0.00823799 | 2.39496 | 299 | nonsynon | AAT | AGT | N | S | EBNA3C |
| NC_007605 | 87054 | C | T | 18 | 17 | 30 | 56 | 0.00826899 | 2.39496 | 300 | nonsynon | CCA | TCA | P | S | EBNA3C |
| NC_007605 | 87179 | C | A | 18 | 17 | 31 | 56 | 0.00963899 | 2.2861  | 341 | nonsynon | AAC | AAA | N | K | EBNA3C |
| NC_007605 | 87187 | G | T | 18 | 17 | 31 | 56 | 0.00962999 | 2.2861  | 344 | nonsynon | CGA | CTA | R | L | EBNA3C |
| NC_007605 | 87522 | G | A | 17 | 15 | 30 | 54 | 0.00775599 | 2.45116 | 456 | nonsynon | GAA | AAA | E | K | EBNA3C |
| NC_007605 | 87528 | T | C | 17 | 15 | 29 | 55 | 0.00677399 | 2.62602 | 458 | nonsynon | TCA | CCA | S | P | EBNA3C |
| NC_007605 | 87535 | T | A | 17 | 15 | 29 | 55 | 0.00673599 | 2.62602 | 460 | nonsynon | GTG | GAG | V | E | EBNA3C |
| NC_007605 | 87537 | A | C | 17 | 15 | 29 | 55 | 0.00676999 | 2.62602 | 461 | nonsynon | ACC | CCC | T | P | EBNA3C |
| NC_007605 | 87555 | C | A | 18 | 15 | 29 | 55 | 0.001715   | 2.85    | 467 | nonsynon | CCG | ACG | P | T | EBNA3C |
| NC_007605 | 87565 | T | C | 18 | 16 | 30 | 55 | 0.00635399 | 2.51786 | 470 | nonsynon | GTG | GCG | V | A | EBNA3C |
| NC_007605 | 87568 | A | G | 18 | 15 | 30 | 55 | 0.003646   | 2.71429 | 471 | nonsynon | GAG | GGG | E | G | EBNA3C |
| NC_007605 | 87571 | T | G | 18 | 15 | 30 | 55 | 0.003663   | 2.71429 | 472 | nonsynon | ATG | AGG | M | R | EBNA3C |

|           |       |   |   |    |    |    |    |            |          |     |          |     |     |   |   |        |
|-----------|-------|---|---|----|----|----|----|------------|----------|-----|----------|-----|-----|---|---|--------|
| NC_007605 | 87573 | C | T | 18 | 15 | 29 | 55 | 0.001682   | 2.85     | 473 | nonsynon | CCA | TCA | P | S | EBNA3C |
| NC_007605 | 87577 | T | C | 17 | 15 | 28 | 55 | 0.003011   | 2.76068  | 474 | nonsynon | ATG | ACG | M | T | EBNA3C |
| NC_007605 | 87591 | C | G | 16 | 15 | 28 | 55 | 0.00658399 | 2.53333  | 479 | nonsynon | CAA | GAA | Q | E | EBNA3C |
| NC_007605 | 87609 | A | G | 16 | 15 | 28 | 55 | 0.00660899 | 2.53333  | 485 | nonsynon | AAA | GAA | K | E | EBNA3C |
| NC_007605 | 87612 | C | G | 16 | 15 | 28 | 55 | 0.00655499 | 2.53333  | 486 | nonsynon | CCG | GCG | P | A | EBNA3C |
| NC_007605 | 87618 | C | T | 16 | 15 | 28 | 55 | 0.00656199 | 2.53333  | 488 | nonsynon | CCA | TCA | P | S | EBNA3C |
| NC_007605 | 87621 | G | T | 16 | 15 | 28 | 55 | 0.00655099 | 2.53333  | 489 | nonsynon | GTC | TTC | V | F | EBNA3C |
| NC_007605 | 87630 | A | C | 16 | 15 | 28 | 55 | 0.00660599 | 2.53333  | 492 | nonsynon | ACG | CCG | T | P | EBNA3C |
| NC_007605 | 87684 | G | A | 16 | 15 | 27 | 55 | 0.00532199 | 2.66667  | 510 | nonsynon | GTC | ATC | V | I | EBNA3C |
| NC_007605 | 87719 | T | G | 16 | 15 | 27 | 55 | 0.00524299 | 2.66667  | 521 | nonsynon | GAT | GAG | D | E | EBNA3C |
| NC_007605 | 87720 | T | G | 16 | 15 | 27 | 55 | 0.00537199 | 2.66667  | 522 | nonsynon | TCA | GCA | S | A | EBNA3C |
| NC_007605 | 87721 | C | A | 16 | 15 | 27 | 55 | 0.00534799 | 2.66667  | 522 | nonsynon | TCA | TAA | S | Z | EBNA3C |
| NC_007605 | 87723 | T | C | 16 | 15 | 27 | 55 | 0.00531499 | 2.66667  | 523 | nonsynon | TCG | CCG | S | P | EBNA3C |
| NC_007605 | 87732 | T | A | 16 | 15 | 27 | 55 | 0.00535199 | 2.66667  | 526 | nonsynon | TCA | ACA | S | T | EBNA3C |
| NC_007605 | 87742 | A | G | 16 | 15 | 27 | 55 | 0.00533999 | 2.66667  | 529 | nonsynon | AAT | AGT | N | S | EBNA3C |
| NC_007605 | 87760 | A | C | 16 | 15 | 27 | 55 | 0.00533499 | 2.66667  | 535 | nonsynon | CAT | CCT | H | P | EBNA3C |
| NC_007605 | 87804 | G | A | 16 | 15 | 27 | 54 | 0.00544099 | 2.61053  | 550 | nonsynon | GCG | ACG | A | T | EBNA3C |
| NC_007605 | 87805 | C | T | 16 | 15 | 27 | 54 | 0.00546799 | 2.61053  | 550 | nonsynon | GCG | GTG | A | V | EBNA3C |
| NC_007605 | 87813 | A | C | 16 | 15 | 27 | 54 | 0.00554399 | 2.61053  | 553 | nonsynon | ACC | CCC | T | P | EBNA3C |
| NC_007605 | 87831 | A | G | 16 | 15 | 27 | 54 | 0.00547099 | 2.61053  | 559 | nonsynon | ACT | GCT | T | A | EBNA3C |
| NC_007605 | 88162 | T | A | 16 | 17 | 27 | 58 | 0.00675599 | 2.45201  | 669 | nonsynon | CTG | CAG | L | Q | EBNA3C |
| NC_007605 | 88167 | T | C | 16 | 17 | 27 | 58 | 0.00679799 | 2.45201  | 671 | nonsynon | TCC | CCC | S | P | EBNA3C |
| NC_007605 | 88458 | C | G | 6  | 31 | 28 | 56 | 0.003648   | 0.313548 | 768 | nonsynon | CCC | GCC | P | A | EBNA3C |
| NC_007605 | 88501 | A | C | 16 | 16 | 27 | 56 | 0.00610599 | 2.52632  | 782 | nonsynon | CAC | CCC | H | P | EBNA3C |
| NC_007605 | 88554 | T | C | 16 | 17 | 26 | 58 | 0.00561299 | 2.58824  | 800 | nonsynon | TCT | CCT | S | P | EBNA3C |
| NC_007605 | 88566 | T | A | 16 | 17 | 27 | 58 | 0.00676599 | 2.45201  | 804 | nonsynon | TGT | AGT | C | S | EBNA3C |
| NC_007605 | 88632 | G | A | 18 | 17 | 30 | 58 | 0.00455    | 2.4958   | 826 | nonsynon | GAT | AAT | D | N | EBNA3C |
| NC_007605 | 88634 | T | A | 18 | 17 | 30 | 58 | 0.004556   | 2.4958   | 826 | nonsynon | GAT | GAA | D | E | EBNA3C |
| NC_007605 | 88638 | A | T | 18 | 17 | 30 | 58 | 0.00452    | 2.4958   | 828 | nonsynon | AGG | TGG | R | W | EBNA3C |
| NC_007605 | 88641 | G | T | 18 | 17 | 30 | 58 | 0.004551   | 2.4958   | 829 | nonsynon | GCA | TCA | A | S | EBNA3C |

|           |        |   |   |    |    |    |    |             |          |     |          |     |     |   |   |             |
|-----------|--------|---|---|----|----|----|----|-------------|----------|-----|----------|-----|-----|---|---|-------------|
| NC_007605 | 88644  | C | G | 18 | 16 | 30 | 58 | 0.003963    | 2.67857  | 830 | nonsynon | CCA | GCA | P | A | EBNA3C      |
| NC_007605 | 88718  | A | T | 18 | 16 | 30 | 57 | 0.003835    | 2.625    | 854 | nonsynon | CAA | CAT | Q | H | EBNA3C      |
| NC_007605 | 89555  | G | T | 24 | 19 | 39 | 57 | 0.00537299  | 2.22222  | 92  | nonsynon | CAA | AAA | Q | K | BZLF2       |
| NC_007605 | 89603  | C | T | 23 | 19 | 38 | 56 | 0.00907499  | 2.12413  | 76  | nonsynon | GTA | ATA | V | I | BZLF2       |
| NC_007605 | 90216  | T | A | 22 | 17 | 39 | 57 | 0.00883799  | 2.2416   | 176 | nonsynon | GAA | GAT | E | D | BZLF1       |
| NC_007605 | 90380  | T | A | 25 | 21 | 38 | 58 | 0.004861    | 2.21755  | 163 | nonsynon | CAA | CTA | Q | L | BZLF1       |
| NC_007605 | 90413  | A | G | 25 | 21 | 38 | 58 | 0.004878    | 2.21755  | 152 | nonsynon | GTG | GCG | V | A | BZLF1       |
| NC_007605 | 90431  | A | G | 25 | 21 | 38 | 58 | 0.004837    | 2.21755  | 146 | nonsynon | GTT | GCT | V | A | BZLF1       |
| NC_007605 | 90642  | A | G | 26 | 21 | 39 | 58 | 0.002836    | 2.2619   | 76  | nonsynon | TCT | CCT | S | P | BZLF1       |
| NC_007605 | 90666  | T | C | 26 | 21 | 39 | 58 | 0.002844    | 2.2619   | 68  | nonsynon | ACC | GCC | T | A | BZLF1       |
| NC_007605 | 92591  | G | A | 3  | 0  | 22 | 57 | 0.00976799  | 19.3133  | 102 | nonsynon | GCG | GTG | A | V | BRLF1       |
| NC_007605 | 95773  | A | T | 11 | 3  | 36 | 57 | 0.000754999 | 6.67213  | 38  | nonsynon | AAC | TAC | N | Y | BKRF1       |
| NC_007605 | 95778  | T | G | 12 | 3  | 37 | 57 | 0.000331    | 7.16129  | 39  | nonsynon | CAT | CAG | H | Q | BKRF1       |
| NC_007605 | 100861 | C | T | 3  | 0  | 15 | 55 | 0.004079    | 28.1273  | 371 | nonsynon | GGG | AGG | G | R | BBLF4       |
| NC_007605 | 100863 | T | C | 3  | 0  | 15 | 55 | 0.004091    | 28.1273  | 370 | nonsynon | CAG | CGG | Q | R | BBLF4       |
| NC_007605 | 100864 | G | A | 3  | 0  | 15 | 55 | 0.004087    | 28.1273  | 370 | nonsynon | CAG | TAG | Q | Z | BBLF4       |
| NC_007605 | 100870 | C | T | 3  | 0  | 15 | 55 | 0.004037    | 28.1273  | 368 | nonsynon | GCC | ACC | A | T | BBLF4       |
| NC_007605 | 100872 | G | A | 3  | 0  | 15 | 55 | 0.004072    | 28.1273  | 367 | nonsynon | ACT | ATT | T | I | BBLF4       |
| NC_007605 | 101364 | T | C | 5  | 0  | 20 | 55 | 0.000414    | 34.2394  | 203 | nonsynon | GAA | GGA | E | G | BBLF4       |
| NC_007605 | 101371 | C | G | 5  | 0  | 20 | 55 | 0.000448    | 34.2394  | 201 | nonsynon | GTG | CTG | V | L | BBLF4       |
| NC_007605 | 124703 | T | G | 7  | 1  | 34 | 56 | 0.002196    | 12.7377  | 159 | nonsynon | AAG | ACG | K | T | BcLF1       |
| NC_007605 | 124709 | G | A | 7  | 1  | 34 | 56 | 0.002193    | 12.7377  | 157 | nonsynon | GCT | GTT | A | V | BcLF1       |
| NC_007605 | 158849 | C | A | 4  | 0  | 34 | 58 | 0.00844099  | 16.2558  | 6   | nonsynon | GTG | TTG | V | L | BALF4       |
| NC_007605 | 165131 | T | C | 10 | 36 | 36 | 57 | 0.000943999 | 0.349462 | 29  | nonsynon | GTC | GCC | V | A | BARF1       |
| NC_007605 | 70812  | G | C | 4  | 0  | 30 | 56 | 0.00643099  | 17.9204  | 361 | nonsynon | GAC | GAG | D | E | BSLF2_BMLF1 |

**Supplemental Table 6. Nucleotide variant compositions of each isolate in their BZLF1 gene upstream promoter region. Nucleotide positions are in upstream relative to TSS of BZLF1 gene. -532 and -524 are variant position within our isolates while these two are not in both promoter types.**

|                 |             |     | -532 | -524 |  | -525 | -460 | -365 | -274 | -141 | -106 | -100 | Zp promoter type         |
|-----------------|-------------|-----|------|------|--|------|------|------|------|------|------|------|--------------------------|
| NC_007605       | Type1 Ref   |     | G    | A    |  | C    | A    | G    | C    | A    | A    | T    | Zp-P                     |
| M81 strain      |             |     | G    | A    |  | A    | G    | A    | A    | G    | G    | G    | Zp-V3                    |
| eBL-Plasma-0049 | Inter-typic | eBL | A    | G    |  | C    | G    | A    | C    | G    | G    | G    | Zp-V3                    |
| eBL-Tumor-0033  | Inter-typic | eBL | A    | G    |  | C    | G    | A    | C    | A    | A    | T    | Zp-P Chimeric with -141A |
| eBL-Tumor-0012  | Inter-typic | eBL | A    | G    |  | C    | G    | A    | C    | G    | G    | G    | Zp-V3                    |
| eBL-Tumor-0001  | Type1       | eBL | G    | A    |  | C    | A    | G    | C    | A    | A    | T    | Zp-P                     |
| eBL-Tumor-0018  | Type1       | eBL | A    | G    |  | C    | G    | A    | C    | G    | G    | G    | Zp-V3                    |
| eBL-Tumor-0002  | Type1       | eBL | G    | A    |  | C    | A    | G    | C    | A    | A    | T    | Zp-P                     |
| eBL-Plasma-0042 | Type1       | eBL | G    | A    |  | C    | A    | G    | C    | A    | A    | T    | Zp-P                     |
| eBL-Plasma-0044 | Type1       | eBL | G    | A    |  | C    | A    | G    | C    | A    | G    | G    | Zp-P Chimeric with -141A |
| eBL-Plasma-0045 | Type1       | eBL | G    | A    |  | C    | A    | G    | C    | A    | A    | T    | Zp-P                     |
| eBL-Plasma-0046 | Type1       | eBL | N    | N    |  | N    | N    | N    | N    | N    | N    | N    | NA                       |
| eBL-Plasma-0047 | Type1       | eBL | G    | A    |  | C    | A    | G    | C    | A    | A    | T    | Zp-P                     |
| eBL-Plasma-0050 | Type1       | eBL | G    | A    |  | C    | A    | G    | C    | A    | A    | T    | Zp-P                     |
| eBL-Plasma-0051 | Type1       | eBL | G    | A    |  | C    | A    | G    | C    | A    | A    | T    | Zp-P                     |
| eBL-Plasma-0052 | Type1       | eBL | G    | A    |  | C    | A    | G    | C    | A    | A    | T    | Zp-P                     |
| eBL-Plasma-0053 | Type1       | eBL | G    | A    |  | C    | A    | G    | C    | A    | A    | T    | Zp-P                     |
| eBL-Plasma-0055 | Type1       | eBL | A    | G    |  | C    | G    | A    | C    | G    | G    | G    | Zp-V3                    |
| eBL-Tumor-0019  | Type1       | eBL | G    | A    |  | C    | A    | G    | C    | A    | A    | T    | Zp-P                     |
| eBL-Tumor-0004  | Type1       | eBL | G    | A    |  | C    | A    | G    | C    | A    | A    | T    | Zp-P                     |
| eBL-Tumor-0005  | Type1       | eBL | G    | A    |  | C    | A    | G    | C    | A    | A    | T    | Zp-P                     |
| eBL-Tumor-0021  | Type1       | eBL | G    | A    |  | C    | A    | G    | C    | A    | A    | T    | Zp-P                     |
| eBL-Tumor-0006  | Type1       | eBL | G    | A    |  | C    | A    | G    | C    | A    | A    | T    | Zp-P                     |
| eBL-Tumor-0007  | Type1       | eBL | G    | A    |  | C    | A    | G    | C    | A    | A    | T    | Zp-P                     |
| eBL-Tumor-0022  | Type1       | eBL | G    | A    |  | C    | A    | G    | C    | A    | A    | T    | Zp-P                     |
| eBL-Tumor-0023  | Type1       | eBL | G    | A    |  | C    | A    | G    | C    | A    | A    | T    | Zp-P                     |
| eBL-Tumor-0025  | Type1       | eBL | A    | G    |  | C    | G    | A    | C    | G    | G    | G    | Zp-V3                    |
| eBL-Tumor-0027  | Type1       | eBL | G    | A    |  | C    | A    | G    | C    | A    | A    | T    | Zp-P                     |
| eBL-Tumor-0037  | Type1       | eBL | G    | A    |  | C    | A    | G    | C    | A    | A    | T    | Zp-P                     |
| eBL-Tumor-0029  | Type1       | eBL | G    | A    |  | C    | A    | G    | C    | A    | A    | T    | Zp-P                     |



**Supplemental Table 6. Nucleotide variant compositions of each isolate in their BZLF1 gene upstream promoter region. Nucleotide positions are in upstream relative to TSS of BZLF1 gene. -532 and -524 are variant position within our isolates while these two are not in both promoter types.**

|                |           |                | -532 | -524 |  | -525 | -460 | -365 | -274 | -141 | -106 | -100 | Zp promoter type         |
|----------------|-----------|----------------|------|------|--|------|------|------|------|------|------|------|--------------------------|
| NC_007605      | Type1 Ref |                | G    | A    |  | C    | A    | G    | C    | A    | A    | T    | Zp-P                     |
| M81 strain     |           |                | G    | A    |  | A    | G    | A    | A    | G    | G    | G    | Zp-V3                    |
| eBL-Tumor-0038 | Type1     | eBL            | G    | A    |  | C    | A    | G    | C    | A    | A    | T    | Zp-P                     |
| eBL-Tumor-0039 | Type1     | eBL            | G    | A    |  | C    | A    | G    | C    | A    | A    | T    | Zp-P                     |
| eBL-Tumor-0041 | Type1     | eBL            | G    | A    |  | C    | A    | G    | C    | A    | A    | T    | Zp-P                     |
| eBL-Tumor-0030 | Type1     | eBL            | G    | A    |  | C    | A    | G    | C    | A    | A    | T    | Zp-P                     |
| eBL-Tumor-0009 | Type1     | eBL            | G    | A    |  | C    | A    | G    | C    | A    | A    | T    | Zp-P                     |
| eBL-Tumor-0031 | Type1     | eBL            | G    | A    |  | C    | A    | G    | C    | A    | A    | T    | Zp-P                     |
| eBL-Tumor-0032 | Type1     | eBL            | A    | G    |  | C    | G    | A    | C    | A    | A    | T    | Zp-P Chimeric with -141A |
| eBL-Tumor-0010 | Type1     | eBL            | G    | A    |  | C    | A    | G    | C    | A    | A    | T    | Zp-P                     |
| eBL-Tumor-0011 | Type1     | eBL            | A    | G    |  | C    | G    | A    | C    | G    | G    | G    | Zp-V3                    |
| eBL-Tumor-0013 | Type1     | eBL            | G    | A    |  | C    | A    | G    | C    | A    | A    | T    | Zp-P                     |
| eBL-Tumor-0034 | Type1     | eBL            | G    | A    |  | C    | A    | G    | C    | A    | A    | T    | Zp-P                     |
| eBL-Tumor-0014 | Type1     | eBL            | G    | A    |  | C    | A    | G    | C    | A    | A    | T    | Zp-P                     |
| eBL-Tumor-0015 | Type1     | eBL            | A    | G    |  | C    | G    | A    | C    | G    | G    | G    | Zp-V3                    |
| eBL-Tumor-0016 | Type1     | eBL            | G    | A    |  | C    | A    | G    | C    | A    | A    | T    | Zp-P                     |
| eBL_CL-01      | Type1     | eBL            | G    | A    |  | C    | A    | G    | C    | A    | A    | T    | Zp-P                     |
| eBL_CL-03      | Type1     | eBL            | G    | A    |  | C    | A    | G    | C    | A    | A    | T    | Zp-P                     |
| HC-0030        | Type1     | HealthyControl | N    | N    |  | N    | N    | N    | N    | N    | N    | N    | NA                       |
| HC-0032        | Type1     | HealthyControl | N    | N    |  | N    | G    | N    | N    | N    | N    | N    | NA                       |
| HC-0035        | Type1     | HealthyControl | A    | G    |  | C    | N    | N    | C    | G    | G    | G    | Most likely Zp-V3        |
| HC-0036        | Type1     | HealthyControl | N    | N    |  | N    | N    | N    | N    | N    | N    | N    | NA                       |
| HC-0037        | Type1     | HealthyControl | G    | A    |  | C    | A    | G    | C    | A    | A    | T    | Zp-P                     |
| HC-0001        | Type1     | HealthyControl | N    | N    |  | N    | N    | N    | N    | N    | N    | N    | NA                       |
| HC-0003        | Type1     | HealthyControl | G    | A    |  | C    | A    | G    | C    | A    | A    | T    | Zp-P                     |
| HC-0007        | Type1     | HealthyControl | N    | N    |  | N    | N    | G    | N    | A    | A    | T    | Most likely Zp-P         |
| HC-0008        | Type1     | HealthyControl | N    | N    |  | N    | N    | N    | C    | N    | N    | N    | NA                       |
| HC-0009        | Type1     | HealthyControl | G    | A    |  | C    | A    | G    | C    | A    | A    | T    | Zp-P                     |
| HC-0010        | Type1     | HealthyControl | N    | N    |  | N    | N    | N    | N    | N    | N    | N    | NA                       |
| HC-0013        | Type1     | HealthyControl | N    | N    |  | N    | N    | N    | N    | N    | N    | N    | NA                       |

**Supplemental Table 6. Nucleotide variant compositions of each isolate in their BZLF1 gene upstream promoter region. Nucleotide positions are in upstream relative to TSS of BZLF1 gene. -532 and -524 are variant position within our isolates while these two are not in both promoter types.**

|                 |           |                | -532 | -524 |  | -525 | -460 | -365 | -274 | -141 | -106 | -100 | Zp promoter type  |
|-----------------|-----------|----------------|------|------|--|------|------|------|------|------|------|------|-------------------|
| NC_007605       | Type1 Ref |                | G    | A    |  | C    | A    | G    | C    | A    | A    | T    | Zp-P              |
| M81 strain      |           |                | G    | A    |  | A    | G    | A    | A    | G    | G    | G    | Zp-V3             |
| HC-0015         | Type1     | HealthyControl | A    | G    |  | C    | G    | A    | C    | G    | G    | G    | Zp-V3             |
| HC-0017         | Type1     | HealthyControl | N    | N    |  | N    | N    | N    | N    | N    | N    | N    | NA                |
| HC-0020         | Type1     | HealthyControl | N    | N    |  | N    | N    | N    | N    | N    | N    | N    | NA                |
| HC-0021         | Type1     | HealthyControl | N    | N    |  | N    | A    | G    | C    | A    | A    | T    | Most likely Zp-P  |
| HC-0024         | Type1     | HealthyControl | N    | N    |  | N    | G    | N    | N    | N    | N    | N    | NA                |
| HC-0025         | Type1     | HealthyControl | N    | N    |  | N    | A    | N    | C    | A    | A    | T    | Most likely Zp-P  |
| HC-0029         | Type1     | HealthyControl | G    | A    |  | C    | A    | G    | C    | A    | A    | T    | Zp-P              |
| eBL-Tumor-0017  | Type2     | eBL            | A    | G    |  | C    | G    | A    | C    | G    | G    | G    | Zp-V3             |
| eBL-Plasma-0043 | Type2     | eBL            | A    | G    |  | C    | G    | A    | C    | G    | G    | G    | Zp-V3             |
| eBL-Plasma-0048 | Type2     | eBL            | N    | N    |  | N    | N    | N    | N    | N    | G    | N    | NA                |
| eBL-Plasma-0054 | Type2     | eBL            | A    | G    |  | C    | G    | A    | C    | G    | G    | G    | Zp-V3             |
| eBL-Tumor-0003  | Type2     | eBL            | N    | N    |  | N    | N    | N    | N    | N    | N    | N    | NA                |
| eBL-Tumor-0035  | Type2     | eBL            | A    | G    |  | C    | G    | A    | C    | G    | G    | G    | Zp-V3             |
| eBL-Tumor-0020  | Type2     | eBL            | A    | G    |  | C    | G    | A    | C    | G    | G    | G    | Zp-V3             |
| eBL-Tumor-0008  | Type2     | eBL            | A    | G    |  | C    | G    | A    | C    | G    | G    | G    | Zp-V3             |
| eBL-Tumor-0036  | Type2     | eBL            | A    | G    |  | C    | G    | A    | C    | G    | G    | G    | Zp-V3             |
| eBL-Tumor-0024  | Type2     | eBL            | A    | G    |  | C    | G    | A    | C    | G    | G    | G    | Zp-V3             |
| eBL-Tumor-0026  | Type2     | eBL            | A    | G    |  | C    | G    | A    | C    | G    | G    | G    | Zp-V3             |
| eBL-Tumor-0028  | Type2     | eBL            | A    | G    |  | C    | G    | A    | C    | G    | G    | G    | Zp-V3             |
| eBL-Tumor-0040  | Type2     | eBL            | A    | G    |  | C    | G    | A    | C    | G    | G    | G    | Zp-V3             |
| eBL_CL-02       | Type2     | eBL            | A    | G    |  | C    | G    | A    | C    | G    | G    | G    | Zp-V3             |
| HC-0031         | Type2     | HealthyControl | N    | N    |  | N    | N    | N    | N    | N    | N    | N    | NA                |
| HC-0033         | Type2     | HealthyControl | N    | N    |  | N    | N    | N    | N    | N    | N    | N    | NA                |
| HC-0034         | Type2     | HealthyControl | N    | N    |  | N    | N    | N    | N    | G    | G    | G    | Most likely Zp-V3 |
| HC-0038         | Type2     | HealthyControl | N    | N    |  | N    | N    | N    | N    | N    | N    | N    | NA                |
| HC-0002         | Type2     | HealthyControl | A    | G    |  | C    | G    | A    | C    | G    | G    | G    | Zp-V3             |
| HC-0004         | Type2     | HealthyControl | A    | G    |  | C    | G    | A    | C    | G    | G    | G    | Zp-V3             |
| HC-0005         | Type2     | HealthyControl | A    | G    |  | C    | G    | A    | C    | G    | G    | G    | Zp-V3             |

**Supplemental Table 6. Nucleotide variant compositions of each isolate in their BZLF1 gene upstream promoter region. Nucleotide positions are in upstream relative to TSS of BZLF1 gene. -532 and -524 are variant position within our isolates while these two are not in both promoter types.**

|            |           |                | -532 | -524 |  | -525 | -460 | -365 | -274 | -141 | -106 | -100 | Zp promoter type  |
|------------|-----------|----------------|------|------|--|------|------|------|------|------|------|------|-------------------|
| NC_007605  | Type1 Ref |                | G    | A    |  | C    | A    | G    | C    | A    | A    | T    | Zp-P              |
| M81 strain |           |                | G    | A    |  | A    | G    | A    | A    | G    | G    | G    | Zp-V3             |
| HC-0006    | Type2     | HealthyControl | N    | N    |  | N    | N    | N    | N    | N    | N    | N    | NA                |
| HC-0011    | Type2     | HealthyControl | N    | N    |  | N    | N    | N    | N    | N    | N    | N    | NA                |
| HC-0012    | Type2     | HealthyControl | N    | N    |  | N    | N    | N    | N    | N    | N    | N    | NA                |
| HC-0014    | Type2     | HealthyControl | N    | N    |  | N    | N    | N    | N    | G    | G    | G    | Most likely Zp-V3 |
| HC-0016    | Type2     | HealthyControl | A    | G    |  | C    | G    | A    | C    | G    | G    | G    | Zp-V3             |
| HC-0039    | Type2     | HealthyControl | N    | N    |  | N    | N    | N    | N    | N    | N    | N    | NA                |
| HC-0018    | Type2     | HealthyControl | N    | N    |  | N    | N    | N    | N    | N    | N    | N    | NA                |
| HC-0019    | Type2     | HealthyControl | A    | G    |  | C    | G    | A    | C    | G    | G    | G    | Zp-V3             |
| HC-0022    | Type2     | HealthyControl | A    | G    |  | C    | G    | A    | C    | G    | G    | G    | Zp-V3             |
| HC-0023    | Type2     | HealthyControl | A    | G    |  | C    | G    | N    | C    | N    | G    | G    | Most likely Zp-V3 |
| HC-0040    | Type2     | HealthyControl | A    | G    |  | C    | G    | A    | C    | G    | G    | G    | Zp-V3             |
| HC-0026    | Type2     | HealthyControl | A    | G    |  | C    | G    | A    | C    | G    | G    | G    | Zp-V3             |
| HC-0027    | Type2     | HealthyControl | A    | G    |  | C    | G    | A    | C    | G    | G    | G    | Zp-V3             |
| HC-0028    | Type2     | HealthyControl | A    | G    |  | C    | G    | A    | C    | G    | G    | G    | Zp-V3             |

Supplemental Table 7. RNA bait sequences used in EBV specific hybrid capture enrichment reactions

| Bait Name    | ID | Bait Sequence                                                                                                               | Ratio in synthesis |
|--------------|----|-----------------------------------------------------------------------------------------------------------------------------|--------------------|
| wt-0-120     | 1  | AGAATTCGCTTGTCTATTACCCCTTACTTTTCTTCTTCCCGCTTCTCTTCTTAGTATGAATCCAGATATGCCTGCCTGAATTGTTGCGCCCTACCTCTTTGGCTGGCGCTATTGC         | 4                  |
| wt-120-240   | 2  | CGCCTCGTGTTCACGGCCCTCAGTTAGTACCCTTGTGACCCGCCACCGGCTTGGCCCTCTCACTTCTACTCTTGGCAGCAGTGGCCAGCTCATATGCCCGTGCACAAAGGAAACTGCTGAC   | 4                  |
| wt-240-360   | 3  | ACCGGTGACAGTCTACTCGGTTGTCACTTGTGAGTACACAGCCACCTTTACAATGCATGATGTTCCGTGAGATTGATCTGTCTTAACAGTTCACTTCTCTGCTTTTCTCTGCT           | 4                  |
| wt-360-480   | 4  | CTTTGCAATTTGCCTAACATGGAGATTGAGGACCCACCTTTTAATCTCTTCTGTTTACGATGTGCCCGCAGCTGGCGGACTACAAGGCATTTACGGTTAGTGTGCCTCTGTTATGAA       | 4                  |
| wt-480-600   | 5  | ATGCAAGTTTGACTTCATATGTATGCCTTGGCATGACGTCAACTTTACTTTTATTTCAGTCTGGTGATGCTTGTGCTCCTGATACTAGCTACAGAAGGAGATGGCGCCGTTTACTGT       | 4                  |
| wt-600-720   | 6  | TTGTGGCGGCATCATGTTTTGGGATGTGACTTGTCCCTCATCGTGCAGCTGTTTTGCGAGCTGAGTCCCTCCTTGGAGCTGTAACGTGGTTTTCCATGACGCTGCTGCTACTGGCTTT      | 4                  |
| wt-720-840   | 7  | CGTCTCTGGCTCTTCCGCCAGGGGGCCTAGTACTCTTGGTGCAGCCCTTTTAAACATTGGCAGCAGGTAAGCCACACGTGTGACATTGCTTGCCTTTTGGCCACATGTTTTCTGGACA      | 4                  |
| wt-840-960   | 8  | CAGGACTAACCATGCCATCTGATTATAGCTCTGGCACTGCTAGCGTCACTGATTTGGGCACACTTAACTTACTACAATGTTCTTCTCATGCTCTATGGACACTTGGTAAGTTTT          | 4                  |
| wt-960-1080  | 9  | CCCTTCTTTAACTCATTACTTGTCTTTTGTAAATCGCAGCTCTAACTTGGCATCTTTTTACAGTGGTCTCCTGATTTGCTTTCGTGCTCTTCAATGCCACTGAGCAAGATCCTCT         | 4                  |
| wt-1080-1200 | 10 | GGCAGACTGTTCCATATAGCTCTCGCACTCTTGTGCTAGCCTCCCGCTAACTCGTGGTGGCAGTATTTTGAACAAACTTCAAGAGTTTAAAGCAGCACTGAATTTATACCCAGTGA        | 4                  |
| wt-1200-1320 | 11 | GTATCTATTTGTTACTCCTGTTTAGTTGAAGAAAACAAGCTATTGGATTGTAACACACATTTTACGCTTGTCTTCTAGATTTGTTCTGCATGTTTACTGATTGTGCTGGCATACTC        | 4                  |
| wt-1320-1440 | 12 | TTCATCTTGTCTATCCTGACCGAATGGGGCAGTGGAAATAGAACATACGGTCCAGTTTTATGTGCCCTGGTGGCCCTGCTCACCATGGTAGCCGGCGCTGTGTGGCTGACGGTGATGTCT    | 4                  |
| wt-1440-1560 | 13 | AACACGCTTTTGTCTGCCTGGATTCTTACAGCAGGATTCCTGATTTTCTCATTGGTAAGTGTGACACCAACAGGTGTGCCCTGTTATGTCACCGTCTGACACATGACTTACATGGT        | 4                  |
| wt-1560-1680 | 14 | TTGGCTTTTGTAGGCTTTGCCCTCTTTGGGGTCAATTAGATGCTGCCGCTACTGCTGCTACTGCTTACACTGGAAAGTGGAGAGCGCCACCGCCCATATCGCAACACTGTATAA          | 4                  |
| wt-1680-1800 | 15 | AGGTAAGTATTATAAATTTAGAGACTATCACGTGTAACCTGACGTGCAAGGATGGAAGAGAGGGGCGAGGAAACGCAATGCCGGTGTGCCGGTATGGGGCCCGTTTATTATGGT          | 4                  |
| wt-1800-1920 | 16 | AAGGCTCTCGGGCAAGATGGAGAGCAACATACAGGAGGAAAGGCTATATGAGTACTCTGTACCACGCTCCGCGCTGGCCTAGACCCGGGGCCCTGATTGCTGAGAACCTGCT            | 4                  |
| wt-1920-2040 | 17 | GCTAGTGGCGCTGCGTGGCACCACACGATCCAGGCCTCAGCGTCAGGAGAGGGCCAGAGAAGTGGCCCTCGTGGCATTCTACTAGGAAACGGCGAGCAGGGTGAACACTTGGGCAC        | 4                  |
| wt-2040-2160 | 18 | GGAGAGTGGCCTGGAGGCCCTCAGGCAACACTATGTATGCCTACGGACCAGACTGGATGGCAAGGCCCTCCACATGTTCCGCGGAAATCCAGCAATTCCTGCGACTCCTGGGGCCAC       | 4                  |
| wt-2160-2280 | 19 | GTACGTGCTTCGCGTGGAGATGGCGAGGCAAGTTGGCTTCGAGGTGCATGAAGCCCGCCCTCTCCGTCAGTTCCAGGCCATCAATCACTTGTCTGTTGACAACGCCCTTCGCCAA         | 4                  |
| wt-2280-2400 | 20 | GTACGATTCGGCCAGGTGGCGCGGGCTTCCAGAGGGCCCTTCTGTTGGCCGGCCAGAGACCGCTGACACGAGGCCGGACCTCCGCAAGCTGAATGAGTGGGTGTTTGGTGGCAGGGC       | 8                  |
| wt-2400-2520 | 21 | TGCTGGTGGCAGACAGCTGGCCGACGAGCTAAAGATCGTCCGCGCTGCGAGACACTTACTGGGCCACTTGGTCTTACGCCACGGAGACCTTGACACATGGAAGGTGTTGAGCAG          | 4                  |
| wt-2520-2640 | 22 | GGACACACGAACCGCTCATAGTTTGGAGCAGGATTCATTATGCCCGGGGACCATCCAGGCCAACTGCCACAGCTGTTTATGAGACGCCAGCACCOCGGCTCTTCCCTTCGTTAA          | 4                  |
| wt-2640-2760 | 23 | TGCAATAGCATCATCGTGGGCTGGTACTACCAGACCGCCACCGCCCGGAGCAGATGCCAGGGCGGGCCCGGCCCAACAGGCCCTTTCAGACCAGGGCGGGGCTGAATGCCATGC          | 8                  |
| wt-2760-2880 | 24 | CAAAAGCGGGTGGCGGCTGTCGGCCCTTCTACAGGACCATCAAGCCACGCTCAAGGGAGGAGGGCCCTACAGCCCACTATGTTTAAACGGGAGCTGGGGCCATCAAGCACCAGGC         | 4                  |
| wt-2880-3000 | 25 | ACTTGACACTGTGAGGTATGACTACGGCCACTTCTATAAATGTTGGGGCCATTCCAGCCATGGAGCGACTGACGGCCCTCCGTCGCCCTACGCCGAAAGTTTATGGGCACAGCGCCG       | 4                  |
| wt-3000-3120 | 26 | CGTGCAGACGGCCCTCGAGCTGTTCTCGGCCCTGTACCCGGCCCGTGCATCTCGGGTACGCGCGCCCGGGCCCAAGTGTGTGATCGAGCATCTGGGGTCCCTAGTTCCAAAGGG          | 8                  |
| wt-3120-3240 | 27 | GGGTCTGCTGTTGTTCTGTCTACCTACCGGATGATGTTAAGGACGGGCTCGGAGAAATGGGGCCGGCCAGGGCCACGGGACCTGGAATGCAGCAGTTTGTGACGACTACTTCCCTAA       | 4                  |
| wt-3240-3360 | 28 | CCCCGCTGTTCCAACGCTTTCATTACAGTGGAGCAGCGAGGGGAGAAGTCAACGGCCGTACCGTCTCCAAAGCCTCGGACGCGCATGCGATATGGCAGGCTGCCAGCACTATGTGCT       | 4                  |
| wt-3360-3480 | 29 | GGGCTCCACGTTTCCCTCGGTGGACTCAACTTTGTCAACGACCTGGCGTCCCGGTTTCCACCGCCGAGATGATGATGATTTCTCCCTTCTTACCCTGGAGTTTCCCCGATTCA           | 4                  |
| wt-3480-3600 | 30 | AGAGGAGGGCGCAAGTTCCCGTACCCTTAGATGTGGACGAGCATGGACATCTCCGCTTACGAGTTCCCTGGCTCTCGCTGGAGTCATGCCCTACAAGCATCTGTCACACCC             | 4                  |
| wt-3600-3720 | 31 | CACCGTGGGAAGCAAGGAGCACTTGGTCAGGCACACGGACAGGGTCCAGCGGAGGACGCGTGGCAGCAGCAGCCCGGGTAGGTCCTCCCTGGACCTGCCGCTGGCGGACTACGCCCTCGTTGC | 8                  |
| wt-3720-3840 | 32 | CCACAGTCAAGTCTGGACCAGGCCGGTGGGGCTCCTCCCTTCCCTTATCGTACCTGGGATCGAATGACAGAGAAGCTGCTTGTCTCCGCAAACCCGGGGAGAGAACGTTAAGGTTTC       | 4                  |
| wt-3840-3960 | 33 | AGGTACCGTGATTACATTTGGGAGAACAGGGGTACAAAGTGTCTGTTGATCTGAGGGAGGGAAACCAGGCTGGCAATGGCTGAGGCGCTGCTGAACGCAGCATGTGCCCAATCTTGGATCC   | 4                  |
| wt-4080-4200 | 35 | CTTTGGCTCGGCCTCTGCCCGAGACCGGCTCGTCCGCTCCAACCTTATGACCGTGGTGGCTCTGTCTCCGCCACGGGAAATCTCGGGTCTCTGATCACGCCAGTGTTCAGAA            | 4                  |
| wt-4200-4320 | 36 | GACGGCAGTCTCCTGATTGCGGTGCGTTGCGGGGATGGCAAGATCCAGGGAGGGTGCCTGTTTGAAGCAGCTTTTAGCGACGTGGCCACGACCCACGGGCAACCCGAGCGGCTGTCTCT     | 4                  |
| wt-4320-4440 | 37 | GAAGAATCTTCCGGGCGAGTCCAGCAGCTGGTCAAGAGCGGCATCGTGTGTCAGGGCATGACATCAGCGACGGGGCCCTGGTACCTGCTGGTGGAGATGGCCCTGGCCGGCAGCG         | 8                  |
| wt-4560-4680 | 39 | CTCCATGAACATGTACCGGCAGTCTCGGTGAGTGGGCGAGCAAGGTCAGATCAATGTTTGAAGTGCAGCAGGCCAGAGACGGTGTGGCCAGTCTGCTGCGCTGCTGCTGGG             | 4                  |
| wt-4680-4800 | 40 | AACCTGGTCATCCTTGGCCAGCAGCATGAGAGTGCCTGCCACAGATCGGATTAACCGGTCATGACGCTGCCACTACGGCTATAACGAAGCACTGGCAGTCTCCCGTTGACAGG           | 4                  |
| wt-4920-5040 | 42 | ATGCTGTGCCGACGGGTGTTCTTCCGAGGTTAGGGACAACAGCTTCTCGACAAGTACGTGGGTCTGGCCATCGGAGGATTCATGGGGCCAGGGACTCTGCCCTGGCAGGCCGTGC         | 4                  |
| wt-5040-5160 | 43 | CACCGTGGCGCTGATTAATCGTTTCCCGCCCTGCGTACGCTATTCTAAAGTTCTCAACAGCCAGATACCTTCCGGTGGCTTGGGGGAGCTGGGGGTGCAAGTTTTGGCTGGCT           | 4                  |
| wt-5160-5280 | 44 | GGGGGCGTGGGGTCAACAGATAATCCACCCGCCCTGGCGTGAAGTTAATGTCAGAGATCACTTCTGATTCTGGCCCCAACGCCCTGGCATGTTTGGTCCCGCTGGTGAACAT            | 4                  |
| wt-5280-5400 | 45 | TAGCATCCGGCGACACCAGCTCTGTGATGCTGCGTGGCTCCGGGGCTGCGTCTGCTTGTGGTGAAGGCTCGTCCCTGGGCTGCAATTTACTAACCTCGGGATGCCATATGT             | 4                  |
| wt-5400-5520 | 46 | TTTGCAAGTGGCCACCAGATCGCTGCCACTTCCACAGCAATGGCAGGATGCCGTGGCGCTTGTCTATGAATTTCAAGAAACCCACGGAGCAGGGCAACATTCAGGGCTCTGTTT          | 4                  |
| wt-5520-5640 | 47 | ACGCGATGGTGTGATCTGGCTCTCCTGTGACCCCTCACTTTGTACAGACTTTTGGCAATGGGAGCACATTTCCCGCCCTTGGGACCCACGGGGTGTCCCTGGACACTTAT              | 4                  |
| wt-5640-5760 | 48 | GTTTCAAGCAGCTCACTATGGTCACTCAGGCAGGCTCCCGCTCCGAGTACCAGTCACTTCCAGTATGCATCACTGAATTTAGCTGATATTGTCCTCCCTAGCCCGGGCCAG             | 4                  |
| wt-5760-5880 | 49 | CCCTCTCAGAAAATCTGCATGAGAAAGCTGGACGTGAACCTCCCGCCAGACCTGTGTGCTGATTTTACAACACTACAATAAACCAATGTGCAAAATGGTTTGTATGGCTACTTT          | 4                  |
| wt-5880-6000 | 50 | GTGTTCTTAAAAATGCAACAATAGAAGTGGAAACCTCAGTACGGGACATTAACCTCAACCACAAAATGGGGTGGAGAAAGTAAACCATATACTGGAGATGATTATGGGCTGGG           | 4                  |
| wt-6000-6120 | 51 | GGTTCGGGACAATACCCATCTGGAGTTCAACCTAATTACATGGTAGATAAAATTAAGAGTCCCTCCTCACCCTCGAAACTATGGCAGACATTTCTATAAGATAACGAGGAGAGATGAG      | 4                  |

|                |     |                                                                                                                            |   |
|----------------|-----|----------------------------------------------------------------------------------------------------------------------------|---|
| wt-6120-6240   | 52  | GTGAGGGCAGAGGACATTGGGCAGGTGTGGGCCACGGGGCAGCTGGCCATATCCCCCGCACTACAGAAGTGTAAAGCAAAGTGAAGGGCTCGGAAGGCAGGGGGCCCTAGCAATGTCACA   | 4 |
| wt-6240-6360   | 53  | GCTAAATGCCACCAGGGCACACACTCAAGCGGGTCTCGGAGCTCCTAGGTGAGACCAGAAAAGGTGACGCTGCAAGGTGGATGGCGTGTTCCTGAGGTTATCCCGCTACGTGCAGT       | 4 |
| wt-6360-6480   | 54  | GCTGGGTGATAGAGACCCTAGAATGTGTCGAAATGACCAAGCGTCCCCGACGGGGCTCCCAACACGGTTCAGAGAGGGTAAAAGAGGGGGCCATAAAGCCAGGGTGTAAAACAC         | 4 |
| wt-6480-6600   | 55  | CGACC CGCCACCAGATGCGACACGTGGGGGAAATGAGGGTTAGCATAGGCAACCCCGCCTACACACCAACTATAGCAAAACCCCGCCCGTACCGGTGACGTAGTCTGTCTTGAGGAGA    | 4 |
| wt-6600-6720   | 56  | TGTAGACTGTAGACACTGCAAAACCTCAGGACCTACGCTGCCCTAGAGGTTTTGTAGGGAGGAGACGTGTGTGGCTGTAGCCACCCGTCGGGTACAAGTCCCGGGTGGTGAGGACG       | 4 |
| wt-6720-6840   | 57  | GTGCTGTGGTTGCTTCCAGACTGCTTTTCCCGCTCTCCGCTCAAGTCCACAGCTGGTGGTCCGCTGTTTGTATCCAACTTTTGTGGTATGATCCATTCATCCCGCAG                | 4 |
| wt-6840-6960   | 58  | TTCCACCTAAACGGGGTTAACGTTGCTATCCCGGATACAGATTAGGATAGCATATACTACCCAGATATAGATTAGGATAGCATATGCTACCAGATATAGATTAGGATAGCATATGCTACCAG | 4 |
| wt-6960-7080   | 59  | AGCCGTTGCCCTAGTGGTTTCGGACACACCCGCAACGCTCAGTGCCTGTACCCAGCCGAGGTCAAGTCCCGGGGGAGGAGAAGAGAGGCTTCCCGCTAGAGCATTTGCAAGTCAGGA      | 4 |
| wt-7080-7200   | 60  | TTCTTAATCCCTCGGGAGAAGGGTATTCGGCTGTCCGCTATTTTTGTGGCTAGTTTTGACCCACAAACATGTAAAGGGCCGCTACCCCTACAACACAAAACAACTATCTCCCT          | 4 |
| wt-7200-7320   | 61  | AACCATCCTTTGCCAATCAATTCGTGACAGGGTTCCTGGACACCCAGTCTTAGTTCAGGTAGACACCCAGTTATGCAAGTCCCAACATTTTAAACCTCCTGGAATTC                | 4 |
| wt-7320-7440   | 62  | TATCATTAAACGGCATGCAGAAAAGGACAAGCAGCGAAAATTCACGCCCTTGGGAGTGGCGGCATATGCAAAAGGATAGCATCCCACTCTACTAGGTGGTATCATATGCTGACTGT       | 4 |
| wt-7440-7560   | 63  | ATATGCGATGAGGATAGCATATGCTACC CGGATACAGATTAGGATAGCATATACTACCCAGATATAGATTAGGATAGCATATGCTACCAGATATAGATTAGGATAGCATATGCTACCAG   | 4 |
| wt-7560-7680   | 64  | ATATAAATAGGATAGCATATACTACCCAGATATAGATTAGGATAGCATATGCTACCAGATATAGATTAGGATAGCATATGCTACCAGATATAGATTAGGATAGCATATGCTACCAG       | 4 |
| wt-7680-7800   | 65  | ATATAGATTAGGATAGCATATGCTATCCAGATATTGGGTAGTATATGCTACCAGATATAAATAGGATAGCATATACTACCCATCTCTATTAGGATAGCATATGCTACC CGGATAC       | 4 |
| wt-7800-7920   | 66  | AGATTAGGATAGCATATACTACCCAGATATAGATTAGGATAGCATATGCTACCAGATATAGATTAGGATAGCATATGCTACCAGATATAAATAGGATAGCATATACTACCCAGATAT      | 4 |
| wt-7920-8040   | 67  | AGATTAGGATAGCATATGCTACCAGATATAGATTAGGATAGCATATGCTACCAGATATAGATTAGGATAGCATATGCTACCAGATATTTGGGTAGTATATGCTACCCATGGCAACAT      | 4 |
| wt-8040-8160   | 68  | TAGCCACCCGTGCTCTCAGCGACCTCGTGAATATGAGGACCAACACCCCTGTGCTTGGCGCTCAGGCGCAAGTGTGTGTAATTTGCTCCAGATCGCAGCAATCGCGCCCTATCTTGG      | 4 |
| wt-8160-8280   | 69  | CCCGCCCACTACTTATGCAGGTATTCGGGGTGCCTATTAGTGGTTTTGTGGGCAAGTGGTTGACCGCAGTGGTTAGCGGGTTACAATCAGCCAAAGTATTACACCTTATTTTAC         | 4 |
| wt-8280-8400   | 70  | AGTCCAAAACCGCAGGGCGGGTGTGGGGCTGACCGTGCCCCACTCCACAATTTCAAAAAAAGAGTGGCCACTTGTCTTTGTTATGGGCCCATTTGGCGTGGAGCCCGGTTAAT          | 4 |
| wt-8400-8520   | 71  | TTTCGGGGTGTAGAGACAACCAAGTGGAGTCCGCTGCTGTGGCGCTCCACTCTCTTCCCTTGTACAATAAGAGTGTAAACAACATGGTTCACCTGCTTGGTCCCTGCCTGGGACAC       | 4 |
| wt-8520-8640   | 72  | ATCTTAATAACCCAGTATCATATGCACTAGGATTATGTGTTGCCATAGCCATAAATCGTGTGAGATGGACATCCAGTCTTACGGCTGTCCCAACCCATGGATTCTATTGTTA           | 4 |
| wt-8640-8760   | 73  | AAGATATTCAGAAATGTTTCATTCTACACTAGTATTTATGCCAAGGGGTTTGTGAGGGTTATTTGGTGTCTATAGCACAATGCCCACTGAACCCCGCTCCAAATTTTATTCTGGG        | 4 |
| wt-8760-8880   | 74  | GGCGTCACTGAAACCTTGTTCGAGCACCTCACATACACCTTACTGTTCACAACTCAGCAGTTATCTATTAGCTAAACGAAGGAGAATGAAGAAGCAGGCGAAGATTGAGGAGATT        | 4 |
| wt-8880-9000   | 75  | CACTGCCCGCTCTTGATCTCAGCCACTGCCCTGTGACTAAAATGGTTCACCTCGTGAATCTGACCCCATGTAATAAAAACCGTACAGCTCATGGGTGGGAGATATCGCT              | 4 |
| wt-9000-9120   | 76  | GTTCCCTTAGGACCCCTTTACTAACCCTAATTCGATAGCATATGCTCCCGTGGGTAACATATGCTATTGAATTAGGGTTAGTCTGGATAGTATATACTACTACCCGGGAAGCATATGCT    | 4 |
| wt-9120-9240   | 77  | ACCCGTTTAGGGTTAAACAAGGGGGCTTATAAACACTATTGCTAATGCCCTCTGAGGGTCCGCTATCGGTAGCTACACAGGCCCTCTGATTGACGTTGGTGTAGCTCCCGTAGTCT       | 4 |
| wt-9240-9360   | 78  | TCCTGGGCCCTGGGAGGTACATGTCCCCAGCAATGGTGAAGAGCTTCAGCCAAAGATTACACATAAAGCAAGTGTGTGTTGAGTCCAGCTCCAGACTGCAAAAGTCTGCTCCAGGTGAA    | 4 |
| wt-9360-9480   | 79  | AGCCACTCAGTGTGGCAAATGTGCACATCCATTTAAGGATGTCAACTACAGTACAGAGAAACCCCTTTGTGTTTGGTCCCGCCCGTGCACATGTGGAACAGGGCCAGTTGGCAAGT       | 4 |
| wt-9480-9600   | 80  | TGTACCAACCAACTGAAGGGATTACATGCACCTGCCCGCGGAAATACGCTCCTACCCAGGAACCCGAAACAGTGTTCGAGAAAGTGTAAAATAGAACGCCCTGGAAGTCCCGCACTG      | 4 |
| wt-9600-9720   | 81  | TGCAATGCAGCTTTAGCCATGCCATGCTCTATAAATCACTCCCTATCTCAGGTAGGCTGCACACCTTAGGATGGAGCGAAGGTTAGTGGTCACTCTGCAGTGCCTGGTGTGCTTT        | 4 |
| wt-9720-9840   | 82  | ACCTGGCACCTGAGTGTGGAGGTACAGACCAATGTGACAATTTTCCCAAAATGTTGAGGGACCTAAGAGATGCCTTCAGTGTGTTAAAACCTTTTCCAGACAAGGACGAGGTAGATA      | 4 |
| wt-9840-9960   | 83  | ACCTTTTGTCAAGGAGTCTCTGCTAGAGACTTTAAGGGCTACCTGGATGCCAGGCCCTGTGAGAAATGATCCAAATCTACCTGGAGGAGTGCACATGCCACAGGCTGAAAACCAAGGACC   | 4 |
| wt-9960-10080  | 84  | CTGAAGCCAAAGACCATGTCAATCTTTGGGTGAAAATCTAAGACCCTACGGCTCCGCCCTGCGCAGGTGCCACAGGTTCTGCGCTGTGAGAAACAAGGTAAGCTGTGGAACAGATAA      | 4 |
| wt-10200-10320 | 85  | TGGAAGCAGGAGATGGGTGCATTTACCCCAACCCCTTTCGACTGTCAATTTACAATAAATGAAACCTTTTATTCTTGATGCTCTGTGTTCTTGGCCCGCAGGTACCTTCTGT           | 4 |
| wt-10320-10440 | 86  | GTTCTCCCGCAGGGAAAAGAAATAGCTTCTGCAGAAGGCCATTGACGCAAGTTTTGCCCGTGGGATTACCCGACCCAGCCACTTACAGCAGATTTTGTCTAGGTCATCTTAGGAGCC      | 4 |
| wt-10440-10560 | 87  | CGGGCCAGCATTTATCAGCTTAACGGGAAGAGAAGTGGGAGGGCACTCGCCCACTAACCTTAACACCTGCAGCCTACAAAAGTACACTAGCTTTGCTCTATTGCGCCACTAGAGACC      | 4 |
| wt-10560-10680 | 88  | GCCAAAGTGCAGAACTACAGGCCCGGGCCAGGCCCTTGCAGGGCAGACGGTTAGGCTGACAAGGGGACAAGTGTGGCAGTGGGCGGGAAGGGGCACAAGAAATGCCGGCAAACTGGACC    | 4 |
| wt-10680-10800 | 89  | ACGGTCCACCCCGCCCTCAAGCGTCCGGGAGCCGGCGCTCGGCTAAGGAGGGCGGCTTGCAGAACTTATTAGTAGCTACCAACAAGGGCCCGCATGCCCGCCACCAAGTCAACCCG       | 8 |
| wt-10800-10920 | 90  | GCCGTGCCACTCACATATCCACTCTATTTTAAATTAATGTGCCAAATAGAAACCCAAAGCGCAGAAATAGTTGAGAGGCTAGTGTTTAAACATGCACCCTAGGCCAGCCAGAG          | 4 |
| wt-10920-11040 | 91  | ATAATGTCACAAGATTATCAAGTTGGTGTAAACAGCCGTGGGAAAAATTTATGGTTCAGTGCCTGAGTGTATCTTTGGAACAGTAGAAAATGAACCTTGTGGCGGGAGAAGGAA         | 4 |
| wt-11040-11160 | 92  | TAACGCCTTATCTGGGAGGAGCGAGGATTATAGCCAATAAGAGAGCTCAAGACGCAGGGCTCGCAAAGTATAGTGGCCCGTGGGACCTTAGAGGTGGAGCAACGTTAAAGTGGTAAT      | 4 |
| wt-11160-11280 | 93  | AACACCAGCGGGGCTGGGCAAAGGGTCTACGGGCGGGATTAATACGCCCTGCTACGCAAGCTCAGTTAATTCGCCACGACTTGA AAAATGATGCCCTTAAACCAATGGCGGCC         | 4 |
| wt-11280-11400 | 94  | CTAAGGGGGGACTAAGTCCCACTCAAAAACCTGTGTTCTGCTGCAAAATTTAGATCAGATGGCATAGAGACAAGGACACCAGAACCCCGAGCCCTCATCGAGGGTCTTACC            | 4 |
| wt-11400-11520 | 95  | ATGCGGCCATGTAGGCCCACTTAACACTACAAGACCTACGCCCTCCATTATCATGTAAACCCACAATCATCTAAACCGTAAAGTCTAAGGGCCTCCTGAGGTTTTCTCAGGAGGCCCTA    | 4 |
| wt-11520-11640 | 96  | ATGTATAAATATCATGCAATTTGATTTAAAAAAGTAGGTACACTCATTTTAGGCCAGACTTTATTTGCAGATTAATAATTTATGTGATTCTCCTTCCCTTAGGACTGAAGAAACAGC      | 4 |
| wt-11640-11760 | 97  | CTCCTGCACGTGAGCATGTATCTGAAATAATTTATATGCATAAGTGAATGATTAGAAAGTCAAAAACCACTTCCCTTTACATGAATCTGGGCACGTAATTTGGGGTACTTCTAAAG       | 4 |
| wt-11760-11880 | 98  | ACTAACGTGTTGATTTCCGGGTCACCTCCCTTTTAAAGTGTGTAACAGTATTTCAGTAAACCAAGAGATTTGGTGTCACTTCCGCATTTAAGTTTCAGAAAAATTTAAAA             | 4 |
| wt-11880-12000 | 99  | TAAAATGAAATTTCTCTCAAAAATTTCCAATGAAAACCTCAAAAAGTCTTATGATGTAATCTTTTGGCCCAAGTGGCTTCAGATGCCTTCTTAGTCACTTCACAAAAAATTT           | 4 |
| wt-12000-12120 | 100 | CTGGACACATGTGCCAGACGCTGGGCCCTTAAGGCCCTCGGGTCCCTGAGCCCGGCTCAGCAACCCCTGCTGCTCCCTGCGCACCCCGAGCCCTCCCGCTCCCGCTCCCGCT           | 8 |
| wt-12120-12240 | 101 | CGCTCCTGTTCTCCCGGGTCCCGAGTAGGGCCGCTGCCCCCTGCACCCAGTACCTGCCCTTGGCCACGCACCCCGGGCCAGGCCACTTAGACCCGGCAAGCCCATCCCTG             | 8 |
| wt-12240-12360 | 102 | AAGACCCAGCGCCATTCTCTGTGTAACGAGCAGAGAAGAAGTAGAGGCCCGGGCCATTGGGCCAGATTGAGAGACCAGTCCAGGGGGCCGAGGTTGGAGCCAGCGGGCACCCGAGG       | 4 |

|                |     |                                                                                                                         |    |
|----------------|-----|-------------------------------------------------------------------------------------------------------------------------|----|
| wt-12360-12480 | 103 | TCCCAGCACCCGGTCCCTCCGGGGGGCAGAGACAGGCAGGGCCCCCGGCGAGCTGGCCCCGAGGAGGGCCCGGAGTGGGGCCGGTCCGGTGGGCTGGCCGAGCCCGGGTCTGGGAGGTC | 12 |
| wt-12480-12600 | 104 | TGGGGTGGCGAGCCTGCTGTCTCAGBAGGGGCTGGCTCCGCGGGTGGCCCTGGGGTAAGTCTGGGAGCAGAGGGTCCGGCTAGGCCCGGGAAAGTGGAGGGGATCGCCCGGGTCTC    | 8  |
| wt-12600-12720 | 105 | TGTTGGCAGAGTCCGGGCGATCCTCTGAGACCTCCGGGCCCCGACGGTCCGCTCAGCCCCCAGACAGACCCAGGGTCTCCAGGCAGGGTCCGGCATCTCAGGGGCAGCAGGCTCA     | 8  |
| wt-12720-12840 | 106 | CCACCACAGGCCCCCCAGACCCGGGTCTCGGCCAGCCGAGCCGACCGGCCCGCGCTGGCGCCCTCTCGGGGCCAGCCGCCGGGTGGTCTCGCCCTCTCTGTCTTACAGAGAA        | 8  |
| wt-12840-12960 | 107 | CCAGGGCAGTCCGGCACCCAGAGCCCTCGGGCCCGCTCCAGGCGCCCTCTGGTCTCCGCTCCCTCTGAGCCCGCTTAAACCCAAAGAATGTCTGAGGGGAGCCACCCTCGGGG       | 8  |
| wt-12960-13080 | 108 | CAGGCCACAGTCCAGAGTCCAGGGCACCTCAGGTGCTCCCGGGTCCAGGGTCCAGCCAGCCGAGGGACCCCGGCGCCAGCCCGGGTCTCCGCCCCCTCCCGGG                 | 12 |
| wt-13080-13200 | 109 | CTTACAGAGCCAGGATGCCCCAGAAAGGACCTAGGCGTCCCTCTCCCTCCAGGCCGAGCCCTCCCTCGCGGAGAGGGGCTCTTTGGCCCTCAAGTCCAGCCAGCCGA             | 8  |
| wt-13200-13320 | 110 | GACCCGAGTGGCCGGATCCCCCACGGCCCTCTCTGTCCCTGCTCTCTCCAACTTCGCTCCACCTAGACCCAGCTTCTGGCTCCCGGGTCCACCAGGCCAGCCGGAG              | 8  |
| wt-13320-13440 | 111 | GGACCCCGGAGCCCGGGCAGTCCGCTTCCCTCTCCCTGGCTCTCTTCCGCTCCACCCGAGCCCGCTCAGCTTGGCTCCCGCCAGCCGGTCCATCAGGCCGGCCGAGGGACCCC       | 12 |
| wt-13440-13560 | 112 | GGCGGCCGGTGTGACTCCCCCTGCAGCCGCCAGTCTCTGCTCCAGGCAAGGGCCGACGCTTTTCTCCCCCAGCCTGAGGCCAGTCTCTGTGCACTGTCTGAAAGTCCAGCCT        | 8  |
| wt-13560-13680 | 113 | CCCAGCCCGTCCAGGCTCCCGGCCAGCCTCGTCCACCCCTCCACCGTGGACAGCCCTCTGTCACCCGGCCATCCCCGCCCTGTGTCCACCCAGTCCGTCAGGGGG               | 8  |
| wt-13680-13800 | 114 | GACTTTATGTACCCCTGGGCTCCCATAGACTCCATGTAAGCTGCCCTCGAGTAGGCGCCGAGCCCTCCCTCGCGGAGAGGGGCTTTGGCCCTTCCAGCCAGCCCGGCC            | 8  |
| wt-13800-13920 | 115 | AAACTTTGTCCAGATGTCCAGGGTCCCGAGGGTGGAGCCAGCCCTCCCGCCCTGTCCACTGCCCGGTCCCCAGAAGCCCAAAAGTAGAGGCTCAGGCCATGCGCGCCCT           | 8  |
| wt-13920-14040 | 116 | GTCACAGGCTGCCAAAGAGCAGATCAAGGCCGGGAGAGGCGAGCCCAAGCGGGTGCAGTAACAGTAATCTCTGGTAGTGATTTGGACCCGAAATGTACACTTTAGAGCTCTGG       | 4  |
| wt-14040-14160 | 117 | AGGACTTTAAACTCTAAAATCAAACCTTTAGAGGCGAATGGGCGCCATTTTGTCCACGCGCCGATAATGGCGGACCTAGGCCATAAACCCCGAGGAAGCGGGTCTATGTTGGCTG     | 4  |
| wt-14160-14280 | 118 | CGTGCTGCTATCTTTAGAGGGGAAAGAGGAATAAGCCCCAGACAGGGGAGTGGGCTGTTGTGACTTACCAGAGGTGAGGGGTTGCGGTTGCTAGGCCACCTTCTC               | 4  |
| wt-14280-14400 | 119 | AGTCCAGCGCTTACGTAAAGCCAGACAGCAGCCAAATGTGAGTCTAGGGAGGGGACCACTGCCCTGGTATAAAGTGGTCTGCAGCTATTTCTGGTGCATCAGAGCCAGGAGT        | 4  |
| wt-14400-14520 | 120 | CCACAAATGTAAGAGGGGTTCTACCTCTCCTAGCCCTCCGCCCTCCAGGACTGGGCGCCAGTTTCTAACTTTCCCTTCCCTCCCTGCTTGGCTGCGCCGGGGCCA               | 4  |
| wt-14520-14640 | 121 | CCTTCATCACCGTCCGCTGACTCCGCATCAAGCCTAGGGGAGCCGAAGTGAAGGCCCTGGACCAACCCGCGCCGGCCCGGATCGGGCCAGAGGTAAGTGGACTTTAATTTTT        | 4  |
| wt-14640-14760 | 122 | CTGCTAAGCCCAACTCCACCACACCCAGGCACACACTACACACCCACCCGCTCAGGGTCCCTCGGACAGCTCCTAAGAAAGCCAGCCGTCGCCAGTCTACCAGAGGGGGCCAA       | 4  |
| wt-14760-14880 | 123 | GAACCCAGACGAGTCCGTAGAAGGCTCCTGCTCAGCAAGAAGAGGAGTGGTAAGCGTTCACCTTCAGGGGTAAGTAACCTGACCTCTCCAGGGCTCACATAAGGGAGGCTTAGTAT    | 4  |
| wt-14880-15000 | 124 | ACATGCTTCTTGCCTTACAGGAACCTGGGGCTAGTCTGGGTGGGATTAGGCTGCCCTAAGTTCATCAGCCAGGGCTTATGCCCTCCTCAGTTCCTTAGTCCCGGGCTCAGGCC       | 4  |
| wt-15120-15240 | 126 | CTGGACCCCGGCTCAGCAACCTGCTGCTCCCTCCTGCCACCCAGCCTCCCCCTCCCGTCCCTTCTGCTCCTGATCTCCCCGGTCCCGAGTAGGGCCGCTGCCCCCTGC            | 12 |
| wt-15240-15360 | 127 | ACCCAGTACCTGCCCTCTTGGCCACGCCACCCGGGCCAGGCCACCTTAGACCCGGCAAGCCCATCCCTGAAGACCCAGCGCCATTCTCTGTGTAACGAGCAGAGAAGAAGTAGAG     | 4  |
| wt-15360-15480 | 128 | GCCCCGGCCATTGGGCCAGATTGAGAGACAGTCCAGGGGCCGAGGTTGGAGCCAGCGGCCACCCGAGTCCAGCAGCCCGGTCCTCCGGGGGGCAGAGACAGGCAGGGCCCCCG       | 8  |
| wt-15480-15600 | 129 | GCAGTGGCCCCGAGGAGGGCCCGGAGTGGGGCCGGTCCGCTGGGCTGGCCGAGCCCGGGTCTGGGAGGTTGGGGTGGCGAGCCTGCTGTCTCAGGAGGGGCTGGCTCCGCCGGTG     | 12 |
| wt-15600-15720 | 130 | GCCCTGGGGTAAGTCTGGGAGGCAGAGGGTCCGCTAGGCCCGGGAAAGTGGAGGGGATGCCCGGGTCTCTGTTGGCAGATCCGGGCGATCCTGTAGACCTCCGGCCCGGACGG       | 8  |
| wt-15720-15840 | 131 | TGGCCCTCAGCCCCCAGACAGACCCAGGGTCTCCAGGCCAGGGTCCGGCATCTCAGGGCAGCAGGCTACCACACAGGCCCCCCAGACCCGGGCTCTCGGCCAGCCGAGCCGG        | 8  |
| wt-15840-15960 | 132 | CCCCGCGCTGGCGCTCCTCGGGGCCAGCCCGGGGTTGGTTCTGCCCTCTCTGTCTCCTCAGAGGAACAGGGACCTCGGGCACCCAGAGCCCTCGGGCCCGCTCCAGGCGC          | 12 |
| wt-15960-16080 | 133 | CCTCCTGTCTCCGCTCCCTCTAGACCCGTTAAACCCAAAGAATGTCTGAGGGGAGCCACCTCGGGGCCAGGCCAGAGTCCAGAGGTGAGGGGACCTCAGGGTGCCTCCCGG         | 8  |
| wt-16080-16200 | 134 | GTCCAGGCCAGCCGAGGGACCCCGGCGAGCCCGGGCCGCCCCAGAGGCCGGTCTCCGCCCCCTCCCGGGTTCAGAGCCAGGATGTCCCCCAGAGGGACCTAGGCGTCCCTCT        | 8  |
| wt-16200-16320 | 135 | CCTCCCTCCAGGCCGAGCCTCCTCCGCGGAGAGGGGCTCTTTGGCCCTCAAGTCCAGCCACCCAGAGCCGAGTGGCCCGATCCCCCAGCCGCGCTTCTCTGTCCCTC             | 8  |
| wt-16320-16440 | 136 | GCTCCTCCTCAACCTTCCGCTCCACCCTAGACCCAGCTTCTGGCTCCCGGGTCCACCAGGCCAGCCGAGGGACCCCGGCGAGTCCGCTTCCCTCCTCCCTGGCTCTC             | 8  |
| wt-16440-16560 | 137 | CTTCCCGCTCCACCCGAGCCCTCAGCTTCCCTCCACCCGGTCCATCAGCCCGCGGAGGGACCCCGGGCCCGGTGTGAGTCCCTCCGAGCCCGCAGTCTCTGCCTCCA             | 12 |
| wt-16560-16680 | 138 | GGCAAGGGGCCAGCTTTTCTCCCCCAGCCTGAGGCCAGTCTCCTGTGCACTGTCTGTAAGTCCAGCCTCCACAGCCCGTCCAGGCTCCCGGGCCAGCCTCTGTCCACCCCTCCC      | 8  |
| wt-16680-16800 | 139 | ACGGTGGACAGGCCCTCTGTCCACCCGGGCATCCCGCCCCCTGTGTCCACCCAGTCCCGTCCAGGGGGAGCTTTATGTGACCCTTGGCCCTGGCTCCCCATAGACTCCCATGTAAG    | 8  |
| wt-16800-16920 | 140 | CCTGCCTCAGTAGGTGCTCCAGAGCCCTTTTGGCCCTGGCGGCCAGCCCGGGCCCGCCAACTTTGTCCAGATGTCAGGGGTCCCCGAGGGTGGGCCAGCCCG                  | 8  |
| wt-16920-17040 | 141 | CTCCCGCCCTGTCCACTGCCCGGGTCCCCCAGAAAGCCCAAAAGTAGAGGCTCAGGCCATGCGCGCCCTGTACCAGGCTGCCAAAGAGCCAGATCAAGGCCGGGAGAGGCC         | 8  |
| wt-17040-17160 | 142 | CCAAAGCGGTGACGTAACAGGTAATCTCTGGTAGTGATTTGGACCCGAAATCTGACACTTTAGAGCTTGGAGGACTTTAAACTCTAAAATCAAACCTTTAGAGGCGAATGGCGCC     | 4  |
| wt-17160-17280 | 143 | ATTTGTCCACGCGCGCATAATGGCGGACCTAGGCCATAAACCCCGAGGAGGGGCTATGTTGGTGGCTGCTGCTATCTTTAGAGGGGAAAAGAGGAATAAGCCCCAGACAG          | 4  |
| wt-17280-17400 | 144 | GGGAGTGGGCTGTTGTGACTTCAAAAAGGTAGGGCCAAAGGGGTTGCGGTTGCTAGGCCACCTTCTCAGTCCAGCGGCTTACGTAAGCCAGACAGCAGCAATTTGTCAGTTCTA      | 4  |
| wt-17400-17520 | 145 | GGGAGGGGACCCTGCCCTGGTATAAAGTGGTCTGCACTATTTCTGGTGCATCAGAGCCGAGGACTCCACAAATGTAAGAGGGGGTCTTCTACCTCTCCCTAGCCCTCCGC          | 4  |
| wt-17520-17640 | 146 | CCCTCAAAGACTCGGGCCAGTTTCTAACCTTTCCCTTCCCTCCCTGCTTGGCTGCGCCGGGGCCAGCTTATCACCCTCGCTGACTCCGCCATCAAAGCCAGGGGAGCCGA          | 4  |
| wt-17640-17760 | 147 | AGTGAAGGCCCTGACCAACCCGGCCCGGGCCCGGATCGGGCCAGAGGTAAGTGGACTTTAATTTTTCTGCTAAGCCCAACACTCCACCACCCAGGCACACTACACACC            | 4  |
| wt-17760-17880 | 148 | CACCCGCTCAGGGTCCCTCGGACAGTCTCTAAGAAGGCACCGGTCGCCAGTCTACCAGAGGGGCCAAGAACCAGACGAGTCCGTAAGGGTCTCGTCCAGCAAGAAGAGGAG         | 4  |
| wt-17880-18000 | 149 | GTGGTAAGCGGTTACACTTACAGGGTAAAGTAACCTGACCTCTCCAGGGCTCACATAAAGGGAGGCTTAGTATACATGCTTCTGCTTTTACAGGAACCTGGGGGCTAGTCTGGGTGGGA | 4  |
| wt-18000-18120 | 150 | TTAGGCTCCCTCAAGTGTGACTCAGCCGGCTTTCATGCCCTCCTCAGTCCCTAGTCCCGGGCTTCCAGCCCGCTCCGTCGCCCTCCAGAGCCCGGGCTTCCAGGCCCTGCCTCTC     | 8  |
| wt-18240-18360 | 152 | CCTCCCGCTCCCGTCCCTTCCCTGCTGATCTCCCGGTCACCCAGTAGGGCCGCTGCCCGCTCAGCCAGTCCGCTCCCTCTTGGCCAGCACCCCGGGCCAGCCACTT              | 8  |
| wt-18360-18480 | 153 | AGACCCGGCAAGCCCATCCCTGAAGACCCAGCGGCCATTCTCTGTGTAACGACAGAGAAGTAGAGGCCCGGGCCATTGGGCCAGATTGAGAGACCAAGTCCAGGGGCCAG          | 4  |
| wt-18480-18600 | 154 | GTTGGAGCCAGCGGCCACCCGAGGTCCAGCACCCGGTCCCTCCGGGGGCGAGAGACAGGCAGGGCCCGGCGAGTGGCCCGAGGAGGGCCCGGAGTGGGGCCGGTCCGCTGGGCT      | 12 |
| wt-18600-18720 | 155 | GGCCGAGCCGGGCTGGGAGGTCTGGGGTGGCGAGCCTGCTGTCTCAGGAGGGGCTGGCTCCCGGGTGGCCCTGGGGTAAGTCTGGGAGGCAGAGGGTCCGCTAGGCCCGGGAA       | 8  |

|                |     |                                                                                                                       |    |
|----------------|-----|-----------------------------------------------------------------------------------------------------------------------|----|
| wt-18720-18840 | 156 | GTGGAGGGGATCGCCGGGTCTGTGGCAGAGTCCGGGCGATCCTCTGAGACCTCCGGGCCGGACGGTGCCTCAGCCCCAGACAGACCCAGGGTCTCCAGGAGGGTCCG           | 8  |
| wt-18840-18960 | 157 | GCATCTCAGGGCAGCAGGCTACCCACCACAGGCCCCAGACCCGGTCTCGGCCAGCCGAGCCAGCCGGCCCGCGCTGCGCCTCCTCGGGCCAGCCGCGGGTTGGTCTGC          | 12 |
| wt-18960-19080 | 158 | CCCTCTCTGTCTTCCAGAGGAACCCAGGACCTCGGCACCCAGAGCCCTCGGGCCGCTCCAGGCCCTCTGGTCTCCGCTCCCTCTGAGCCCGTTAAACCCAAAAGTGT           | 8  |
| wt-19080-19200 | 159 | CTGAGGGGAGCCACCTCGGGGCCAGGCCCCAGAGTCCAGAGGTGAGGGGACCTCAGGGTGCCTCCCGGGTCCAGGCCAGCCGGAGGACCCGGCAGCCGGCGGCCAGAGG         | 12 |
| wt-19200-19320 | 160 | CCGGTTCCTCGCCCTTCCCGGGCTTCAGAGCCAGGATGTCCCCAGAAAGGACCTTAGCTGCTCCCTCCCTCCAGGCCGAGCCCTCCCTCGCGGAGAGGGCCCTTTG            | 8  |
| wt-19320-19440 | 161 | GGCCCTCAAGTCCAGCCACCCAGGACCCGATGGCCCGGATCCCCACCGCCCTCTGCTGTCCCTGCTCCAACTTCGCTCCACCTAGACCCAGCTTCTGCCTCC                | 8  |
| wt-19440-19560 | 162 | CCGGTCCACAGGCCAGCCGGAGCCCGGACCCCGGCGGGGCTAGCGCTTCCCTCTCCCTGCTCCCTGCTCCCTCCACCCGAGCCCGCTCAGCTGCCACCCAGGGTC             | 12 |
| wt-19560-19680 | 163 | CATCAGGCCGGCCGGAGGGACCCCGCGGCCGGTGTGAGTCCCTCCGAGCCGCCAGTCTGCTCCAGGCAAGGGCGCCAGCTTTTCTCCCGCAGCTGAGGCCAGTCTCCTG         | 8  |
| wt-19680-19800 | 164 | TGACTGTCTGTAAGTCCAGCCTCCACAGCCCGTCCACGGTCCCGGGCCAGCCTCGTCCACCCCTCCACAGGTGAGCAGGCCCTCTGTCCACCCGGGCCATCCCGCCCGCTGTG     | 8  |
| wt-19920-20040 | 166 | CCAGCCGACCCCGGGCGCCCAAACTTTGTCCAGATGTCCAGGGTCCCGAGGGTGAAGGCCAGCCCTCCCGCCCTGTCCACTGCCCGGTCCCGCCAGAACGCCCAAAAGT         | 8  |
| wt-20040-20160 | 167 | AGAGGCTCAGGCCATGCGCCCTGTACCAGCCCTGCCAAAGGCCAGATCTAAGCCGGGAGGAGCCAGCCCAAGCGGGTGCAGTAACAGTAACTCTGTAGTATTGGACCCG         | 4  |
| wt-20160-20280 | 168 | AAATCTGACACTTTAGAGCTCTGGAGACTTAAAACTCTAAAACTCAAAGCTTTAGAGCGAATGGCGCCTTTTGTCCCGCAGCCGCAATAGGGCCAGCTTAGGCCCTAAAAACCC    | 4  |
| wt-20280-20400 | 169 | AGGAAGCGGGTCTATGTTGGTGCCTGCTGCTATCTTTAGAGGGGAAAAGGAATAAGCCCCAGACAGGGGAGTGGGCTGTTTGTGACTTACCAAAGGTGAGGCCCAAGGGG        | 4  |
| wt-20400-20520 | 170 | TTCCGCTTGTAGGCCACTTCTCAGTCCAGCGGTTTACGTAAAGCCAGACAGCAGCAATTTGCTAGTCTAGGGAGGGGACCAGTCCCTGGTATAAAGTGGTCTGCAGTATTTT      | 4  |
| wt-20520-20640 | 171 | TGGTCCGATCAGAGCGCCAGGAGTCCACACAATGTAAGAGGGGGTCTTACCTCTCCCTAGCCCTCCGCCCTCCAAAGGACTCGGGCCAGTTTCTAACTTTCCCTCCCTCCCT      | 4  |
| wt-20640-20760 | 172 | CGTCTGCCCTGCGCCCGGGCCACTTATCACCCTGCTGACTCCGCATCAAAGCTAGGGGAGACCAGTGAAGGCCCTGGACCAACCCGGCCCGGGCCCGGGTATCGGGCCA         | 8  |
| wt-20760-20880 | 173 | GAGGTAAGTGGACTTTAATTTTTCTGCTAAGCCCAACACTCCACCACACCAGGCACACACTACACACACCACCCGCTCAGGGTCCCTCGGACAGCTCCTAAGAAGGCACCCGTCG   | 4  |
| wt-20880-21000 | 174 | CCCAGTCTACCAGAGGGGCCAAGAACCAGACGAGTCCGTAGAAGGGTCTCGTCCAGCAAGAAGAGGAGTGGTAAGCGGTTACCTTCAGGGGTAAGTAACCTGACCTCTCCAGGG    | 4  |
| wt-21000-21120 | 175 | CTCACATAAAGGGAGGCTTAGTATACATGCTTCTGCTTTTACAGGAACCTGGGGGCTAGTCTGGTGGGATTAGGCTGCCTCAAGTTGCATCAGCCAGGGCTTCATGCCCTCCTCAGT | 4  |
| wt-21120-21240 | 176 | TCCCTAGTCCCGGGCTTCAGGCCCCCTCCGTCGCCGCTCCACAGAGACCCGGGCTTCAGGCCCTGCCTCTCCTGTTACCCCTTTAGAACACAGCCTGGACACATGTCCAGACGCCCT | 4  |
| wt-21240-21360 | 177 | GGCCTTAAGGCCCTCGGGTCCCTTGACCCCGGCCTCAGCAACCTGCTGCTCCCTCCTGCCACCCAGCCTCCCGCCCTCCCGTCCCGCTTCGCTCCTGATCTCCCGGGTCC        | 8  |
| wt-21360-21480 | 178 | CAGTAGGGCCGCTGCCCGCTGACCCAGTACCTGCCCCCTTGGCCAGCCACCCGGCCAGGCCCTTAGACCCGGCCAAAGCCCATCCCTGAAGACCAGCGGCCATCTCTCTG        | 8  |
| wt-21480-21600 | 179 | GTAACGAGCAGAGAAGAAGTAGAGGCCCGCGCCATTGGCCAGATTGAGAGACCAGTCCAGGGGCCGAGGTTGGAGCCAGCGGCACCCGAGGTCACAGCACCAGGTCCTCCGGGG    | 8  |
| wt-21600-21720 | 180 | GGCAGAGACAGCAGGCCCGCCCGCAGCTGGCCCGAGGAGCCCGGAGTGGGGCCGCTGGCTGGGCTGGCCAGCCGGGCTGGGAGTCTGGGTGGCAGCCTGCTGTCTCA           | 12 |
| wt-21720-21840 | 181 | GGAGGGCCCTGGCTCCGCCGGGTGGCCCTGGGGTAAGTCTGGGAGGCAGAGGGTCCGCCCTAGGCCCGGGGAAGTGGAGGGGATCGCCGGGTCTGTTGGCAGAGTCCGGCCGATCCT | 8  |
| wt-21840-21960 | 182 | CTGAGACCTCCGGGCCGGAGCGGTCGCCCTCAGCCCCAGCAGACAGCCAGGGTCTCCAGGCAAGGGTCCGGCATCTTCAGGGGAGCAGGCTCACCACCAGGCCCCAGACCCGG     | 8  |
| wt-21960-22080 | 183 | GTCTCGCCAGCCGAGCCGACCCGCGCCCTGCGGCTCTCGGGCCAGCCCGGGGTTGGTCTGCCCTCTCTGTCTTCAGAGGAACCCAGGACTCGGGCACCAGAG                | 8  |
| wt-22080-22200 | 184 | CCCCTCGGGCCGCTCCAGCGCCCTCTGGTCTCCCTCCCTCTGAGCCCGTTAAACCCAAAGATGTCTGAGGGGAGCCACCCCTCGGGGCCAGGCCCAAGATCCAGAGGTGAG       | 8  |
| wt-22200-22320 | 185 | GGGCACCTCAGGGTGCCTCCCGGGTCCAGGCCAGCCGGAGGGACCCCGCAGCCCGGGCGCCAGAGGCCGGTCTCCTCGCCCTCCCGGGCTTCAGAGCCAGGATGTCCCCA        | 12 |
| wt-22320-22440 | 186 | GAAGGGACCTAGGCTCCCTCTCCTCCCTCCAGGCCGAGCCTCTCCCTCGCGGAGAGGGGCTCTTTGGCCCTCAAGTCCAGCCCAACCAGACCCGAGTGGCCGGATCCCGCC       | 8  |
| wt-22440-22560 | 187 | ACCGGCCCTTCTCTGTCCCTGCTCCTCCTCAACCTTCTGCTCCACCCTAGACCCAGCTTCTGGCCTCCCGGGTCCACCAGGCCAGCCGGAGGGACCCCGGCAGCCCGGGGAGTC    | 8  |
| wt-22560-22680 | 188 | GCCTTCCCTCTCCCTGGCTCTCCTTCCCGCTCCACCCGAGCCCTCAGCTTGCCTCCACCGGGTCCATCAGCCGCGCCGAGGGACCCCGCGCCCGGTGTGAGTCCCGCT          | 12 |
| wt-22680-22800 | 189 | GCAGCCGCCAGTCTCTGCCCTCCAGGCAAGGGCGCCAGCTTTTCTCCCGCAGCCTGAGGCCAGTCTCCTGTGACTGTCTGTAAGTCCAGCCTCCACGCCCTCCACGGCTCCCGG    | 8  |
| wt-22800-22920 | 190 | GCCCAGCCTCGTCCACCCCTCCCGCAGGTGGACAGGCCCTCTGTCCACCCGGGCCATCCCGCCCGCTGTGTCCACCCAGTCCCTCCAGGGGGACTTTATGTGACCTTGGGCTG     | 8  |
| wt-22920-23040 | 191 | GCTCCCATAGACTCCATGTAAGCCTGCCTCGAGTAGGTGCTCCAGAGCCCTTTTGCCTCCGCGCCAGCCGACCCCGGGCGCCCGCAAACTTTGTCCAGATGTCCAGGGG         | 8  |
| wt-23040-23160 | 192 | TCCCGAGGGTGAGGCCAGCCCTCCCGCCCTGTCCACTGCCCGGTCCCGCCAGAACGCCCAAAAGTAGAGGCTCAGGCCATGCGCGCCCTGTACCAGGCCGCAAAAGAGCCA       | 8  |
| wt-23160-23280 | 193 | GATCTAAGGCCGGGAGAGGCAGCCCAAGCGGGTGCAGTAACAGGTAATCTCTGTTAGTATTGGACCCAAATCTGACACTTTAGAGCTCTGGAGACTTTAAACTCTAAAAATCA     | 4  |
| wt-23280-23400 | 194 | AAACTTTAGAGCGAATGGCGCCATTTTGTCCCGCAGCGCGCATTAATGGCGGACCTAGGCCCTAAACCCCGAGGAAGCGGGTCTATGTTGGCTGCGCTGCTGATCTTTAGAGGGGA  | 4  |
| wt-23400-23520 | 195 | AAAGAGGAATAAGCCCCAGACAGGGGAGTGGGCTGTTTGTGACTTACCAAAGGTGAGGGCCCAAGGGGTTGCGTGTGAGTCCAGCCACTTCTCAGTCCAGCGGCTTACGTAAGCCA  | 4  |
| wt-23520-23640 | 196 | GACAGCAGCAATTGTGAGTCTAGGGAGGGGACCAGTCCCGCTGGTATAAAGTGGTCTGAGCTATTCTGGTGCATCAGAGCGCCAGGAGTCCACACAAATGTAAGAGGGGTCT      | 4  |
| wt-23760-23880 | 198 | CCATCCAGCCTAGGGGAGACCAGTGAAGGCCCTGGACCAACCCGGCCGGGCCCGGGTATCGGGCCAGAGGTAAGTGGACTTTAATTTTTCTGCTAAGCCCAACACTCCACAC      | 4  |
| wt-23880-24000 | 199 | ACCCAGGCACACACTACACACCCACCCGCTCAGGGTCCCTCGGACAGTCTCTAAGAAGGCACCCGTCGCCAGTCTACCAGAGGGGGCCAAAGAACCCAGACGAGTCCGTAGAAGG   | 4  |
| wt-24000-24120 | 200 | GTCTCGTCCAGCAAGAAGAGGGTGAAGCGGTTACCTTCAGGGTAAAGTAACTGACCTCAGCCGCTCAGAGGGTGCATATAAGGGAGGCTTAGTATACATGCTTCTGCTTTCACAGGA | 4  |
| wt-24120-24240 | 201 | ACCTGGGGCTAGTCTGGTGGGATTAGGCTGCCTCAAGTTGCATCAGCCAGGGCTTATGCCCTCCTCAGTTCCTCAGTCCCGGGGCTTCAGGCCCTCCGTCGCCCTCCAGAGA      | 4  |
| wt-24360-24480 | 203 | GCTGCTCCCTCCTGCCACCCAGCCTCCCGCTCCCGTCCCGTCTGCTCCTGATCCTCCCGGTCGCCAGTAGGGCCGCTCCCGCTGCACCCAGTACCTGCCCTCTGGCC           | 8  |
| wt-24480-24600 | 204 | ACGCACCCGGGCCAGGCCACTTAGACCCGGCCAAAGCCCATCCCTGAAGACCCAGCGGCCATTCTCTGTAACGAGCAGAGAAGAAGTAGAGGCCCGCGGCCATTGGGCCAGATT    | 4  |
| wt-24600-24720 | 205 | GAGAGACCAGTCCAGGGGCCGAGGTTGGAGCCAGCGGCCAGGCTCCAGCACCAGCCGGTCCCTCGCGGGGGCAGAGCAGCCAGGGCCCGCCGAGCTGGCCCGAGGAGGCC        | 12 |
| wt-24720-24840 | 206 | GGAGTGGGGCCGCTCGGCTGGGTGAGCCAGCCGGTCTGGGAGTCTGGGAGTCTGGGAGTCTGGGAGTCTGGGAGTCTGGGAGTCTGGGAGTCTGGGAGTCTGGGAGTCTGGGAGGCA | 8  |
| wt-24840-24960 | 207 | GAGGGTGGCCCTAGGCCCGGGAAAGTGGAGGGGATCGCCGGGCTCTGTTGGCAGAGTCCGGGATCCTCTGAGACCCCTCGGGCCCGGACCGTCCGCTCAGCCCGCCAGACAGAC    | 8  |
| wt-24960-25080 | 208 | CCCAGGGTCTCCAGGCAGGGTCCGGCATCTCAGGGGACGAGGCTCACCACCAGGCCCCAGACCCGGGTCTCGGCCAGCCAGCCGACCCGGCCCGGCTGGCGCTCCTCGGG        | 12 |
| wt-25080-25200 | 209 | GCCAGCCCGGGGTTGGTCTGCCCTCTCTGTCTTACAGAGAACCCAGGACCTCGGGCACCCAGAGCCCTCGGGCCCGCTCCAGGCCCGCTCCTGGTCTCCGCTCCCGTCTG        | 8  |

|                |     |                                                                                                                       |    |
|----------------|-----|-----------------------------------------------------------------------------------------------------------------------|----|
| wt-25200-25320 | 210 | AGCCCCGTTAAACCCAAAGAATGTCTGAGGGGAGCCACCTCGGGGCCAGGCCAGAGTCCAGAGGTTCAGGGGACCTCAGGGTGCCTCCCGGGTCCAGGCCAGCCGGAGGGACCC    | 8  |
| wt-25320-25440 | 211 | CGGCAGCCCGGGCGGCCCCAGAGGCCGGTTCCTCGCCCTTCCCGGGCTTCAGAGCCAGGATGTCCCCAGAAAGGACCCTAGGCGTCCCTCTCCCTCCAGGCCAGCCCTCT        | 8  |
| wt-25440-25560 | 212 | CCCTCGGGAGAGGGGCTCTTTGGGCCCTCAAGTCCAGCCACCAGAGACCCGAGTGGCCGGATCCCGCCACCGGCCCTTCTCTGTCCCTCTCTCTCAACCTTCGCTCCAC         | 8  |
| wt-25560-25680 | 213 | CCTAGACCCAGCTTCTGGCCTCCCGGGTCCACCAGGCCAGCCGGAGGGACCCCGGAGCCCGGGCGAGTCCGCTTCCCTCTCCCTGGCCTCTCTCCCGCCTCCACCAGCCGAGCC    | 12 |
| wt-25680-25800 | 214 | CTCAGCTTGCCTCCCCACCGGCTCCATCAGGCCGGCCGAGGGACCCCGGGCCGGTGTACGTCCCCCTGCAGCCGCCAGTCTCTGCCTCCAGGCAAGGGCGCCAGCTTTTCTCC     | 8  |
| wt-25800-25920 | 215 | CCAGCCTGAGGCCAGTCTCTGTGCACCTGTGTAAGTCCAGCCTCCACGCCCTCCCGGGTCCAGCCCTCGTCCACCCCTCCACCGGTGCAGGCCCTCTGTCCAC               | 8  |
| wt-25920-26040 | 216 | CCGGGCTCCCGGCCCTGTGTCCACCCAGCTCCAGCCGGGACTTATGTACCCTTGGCCCTGGCTCCCATAGACTCCCATGTAAGCCTGCCTCGAGTCCGCTCCAG              | 8  |
| wt-26040-26160 | 217 | AGCCCCCTTTGCCCCCTGGCGGCCAGCCCGCCCGGGCGCCCCAACTTTGTCCAGATGTCCAGGGTCCCGAGGGTGGAGCCAGCCCTCCCGCCCTGTCCACTGCCCG            | 8  |
| wt-26160-26280 | 218 | GTCCCCAGAAAGCCCAAAAGTAGAGGCTCAGGCCATGCGCGCCCTGTCCAGGCCCTGCCAAAGAGCCAGATCTAAGGCCGGGAGAGGCCAGCCAAAGCGGGTGCAGTAACAGGTA   | 4  |
| wt-26280-26400 | 219 | ATCTCTGGTAGTATTGGACCCGAAATCTGACACTTTAGAGCTCTGGAGGACTTTAAACTCTAAAATCAAACCTTTAGAGGCCAATGGGCCCATTTTGTCCACCGCCGCTAAT      | 4  |
| wt-26400-26520 | 220 | GGCGGACCTAGGCTAAAACCCAGGAAAGCGGGTCTATGGTTGGCTGCCTGTCTATCTTTAGAGGGGAAAGAGGAATAAGCCCAAGAGGGGAGTGGCTTGTGTGACTTC          | 4  |
| wt-26520-26640 | 221 | ACCAAAGCTCAGGGCCAAAGGGGTTCCGCTTGTAGGCCACTTCTAGTCCAGCGCTTTACAGGACAGACAGCCAAATGTCAGTCTAGGGAGGGGAGCCACTGCCCTGGT          | 4  |
| wt-26640-26760 | 222 | ATAAAGTGGTCTGCAGCTATTCTGGTGCATCAGAGGCCAGGAGTCCACACAAATGTAAGAGGGGTCTTACCTCTCCTAGCCCTCCGCCCTCCAAGGACTCGGGCCAGTT         | 4  |
| wt-26760-26880 | 223 | TCTAACTTTCCCTTCCCTCCCTCGTCTTCCCTGCGCCCGGGCCACCTTATCACCCTGCTGACTCCGCTCCTCAAGCCTAGGGGAGACCGAAGTGAAGGCCCTGGACCAACCCGG    | 4  |
| wt-26880-27000 | 224 | CCCGGCCCCCGGTATCGGGCCAGAGGTAAGTGGACTTTAATTTTTCTGCTAAGCCAACTCCACCACCCAGGCACACACTACACACCCACCCGCTCAGGGTCCCTCGGA          | 4  |
| wt-27000-27120 | 225 | CAGTCTCTAAGAAGCACCGGTGCGCCAGTCTACCAGAGGGGGCCAAAGAACCCAGACGAGTCCGTAGAAGGGTCTCTGTCAGCAAGAAGAGGAGGTGGTAAGCGGTTACCTTCAGGG | 4  |
| wt-27120-27240 | 226 | GTAAGTAACCTGACCTCTCCAGGGCTCACATAAAGGGAGGCTTAGTATACATGCTCTTGGCTTTTACAGGAACTGGGGCTAGTCTGGTGGGATTAGGCTGCCCTCAAGTTGCATCAG | 4  |
| wt-27360-27480 | 228 | CTGGACACATGTCCAGACGCTTGGCCTCTAAGGCCCTCGGGTCCCGTCCAGCCCGGCTCAGCAACCTGCTGCTCCCTCTGCCACCCAGCCTCCCGCCCTCCCGTCCCGCTT       | 8  |
| wt-27480-27600 | 229 | CGTCTGATCTCCCGGTCCCGAGTAGGGCCGCTGCCCCCTGCACCCAGTACTGCCCTCTTGGCCACGACCCCGGGCCAGGCCACTTAGACCCGGCAAGCCCATCCCTG           | 8  |
| wt-27600-27720 | 230 | AAGACCCAGCGCCATTCTCTGTTAACGAGCAGAGAAGAAGTAGAGGCCCGCGGCCATTGGGCCAGATTGAGAGCAGTCCAGGGGCCGAGGTTGGAGCCAGCGGGCACCCGAGG     | 4  |
| wt-27720-27840 | 231 | TCCAGCACCCGGTCCCTCCGGGGCCAGAGACAGGCAGGGCCCGCGCAGCTGGCCCGAGGAGGCCCGGAGTGGGGCCGGTGGCTGGGCTGGCCAGCCCGGGTCTGGGAGGTC       | 12 |
| wt-27840-27960 | 232 | TGGGGTGGCGAGCTGCTGTCTCAGGAGGGGCTGGCTCCCGGGTGGCCGTTGGGTAACTGAGGAGGCAGAGGGTCCGGCTAGGCCCGGGGAAGTGGAGGGGATCGCCCGGGTCTC    | 8  |
| wt-27960-28080 | 233 | TGTTGGCAGATCCGGCGATCCTCTGAGACCTCCGGGCCCGACGGTCCGCCCTCAGCCCCAGACAGACCCAGGGTCTCCAGGCAGGGTCCGGCATCTTCAGGGGACGAGGCTCA     | 8  |
| wt-28080-28200 | 234 | CCACCAGGCCCCAGACCCGGTCTCGGCCAGCCAGCCGACCGCCCGCCGCTGGCCCTCTCGGGCCAGCCCGGGGTTGGTTCTGCCCTCTCTGTCTTCAGAGGAA               | 8  |
| wt-28200-28320 | 235 | CCAGGACCTCGGGCACCCAGAGCCCTCGGGCCGCTCCAGGCCCTCCTGGTCTCCGCTCCCTCTGAGCCCGTTAAACCCAAAGAATGTCTGAGGGGAGCCACCCTCGGGGCC       | 8  |
| wt-28320-28440 | 236 | CAGGCCAGAGTCCAGAGGTTCAGGGCACCTCAGGGTCCCTCCCGGGTCCAGGCCAGCCGAGGGACCCCGGACCCCGGGCCAGCCCGGGTCCCTCGCCCTTCCCGGGG           | 12 |
| wt-28440-28560 | 237 | CTTCAGAGCCAGATGTCCCCAGAAAGGACCTAGGGTCCCTCTCTCCCTCAGCCCGGACCTCTCCCTCGCGGAGAGGGGCTCTTTGGGCCCTCAAGTCCAGCCACCCGAG         | 8  |
| wt-28560-28680 | 238 | GACCCGAGTGGCCCGGATCCCGCCAGCCCTTCTCTCTCCCTCCTCCAACTCTGCTCCCTCAGCCCTCCAGCCCTCCAGCCCTCCAGCCCTCCAGCCCTCCAGCCCTCCAGCCCT    | 8  |
| wt-28680-28800 | 239 | GGACCCCGCAGCCCGGGGAGTCCGCTTCCCTCTCCCTGCTCTCTTCCCGCTCCACCCGAGCCCTCAGCTTCCCTCCACCCGGTCCATCAGGCCGCGGGAGGGACCC            | 12 |
| wt-28800-28920 | 240 | GGCGGCCCGGTGTCAGTCCCGCTGCAGCCGCCAGTCTCTGCTCCAGGCAAGGGCCGACGCTTTTCTCCCGCAGCTGAGGCCAGTCTCTGTGCAGTGTCTGTAAGTCCAGCCT      | 8  |
| wt-28920-29040 | 241 | CCCACGCCGTCACGGCTCCCGGGCCAGCCTCGTCCACCCCTCCCGCCGTTGGACAGGCCCTCTGTCCACCCGGCCATCCCGCCCGCTGTGTCCACCCAGTCCCGTCCAGGGG      | 12 |
| wt-29040-29160 | 242 | GACTTTATGTACCCTTGGGCTGGCTCCCATAGACTCCATGTAAGCTGCTCGAGTAGGTGCCTCCAGAGCCCTTTGCCCTGGGGCCAGCCGACCCCGGGGCCCGCC             | 8  |
| wt-29160-29280 | 243 | AAACTTTGTCCAGATGTCCAGGGTCCCGAGGGTGGAGGCCAGCCCTCCCGCCCTGTCCAATCTGCTCCCTCAGCCCTCCAGGACTCGGGCCAGTTTCTAACTTTCCCTTCCCT     | 8  |
| wt-29280-29400 | 244 | GTCACAGGCTGCCAAAGAGCCAGATCTAAGGCCGGGAGAGGCCAGCCAAAGCGGGTGCAGTAACAGGTAATCTCTGGTAGTGATTTGGACCCGAAATCTGACACTTTAGAGCTCTGG | 4  |
| wt-29400-29520 | 245 | AGGACTTTAAACTCTAAAATCAAACCTTTAGAGGCCAATGGGCCCATTTGTCCCGCCGCGCATAATGGCCGACCTAGGCCATAAACCCAGGAAAGGGGCTATGGTTGGCTG       | 4  |
| wt-29520-29640 | 246 | CGCTGCTGCTATCTTTAGAGGGGAAAGAGGAATAAGCCCCAGACAGGGGAGTGGGCTTTGTTGTGACTTCAACAAAGGTCCAGGCCCAAGGGGTTCCGGTGTAGGCCACCTTCTC   | 4  |
| wt-29640-29760 | 247 | AGTCCAGCGCTTACGTAAGCCAGACAGCAGCAATGTGAGTTCTAGGGAGGGGACCACTGCCCTGGTATAAAGTGGTCTGCAGTATTCTGGTGCATCAGAGCCAGGAGT          | 4  |
| wt-29760-29880 | 248 | CCACACAAATGTAAGAGGGGCTTCTACCTCTCCCTAGCCCTCCCGCCCTCCAAGGACTCGGGCCAGTTTCTAACTTTCCCTTCCCTCCCTGCTCTGGCTGCGCCCGGGGCCA      | 4  |
| wt-29880-30000 | 249 | CCTTCATACCCTGCTGACTCCGCCATCCAAGCCTAGGGGAGCCGAAGTGAAGGCCCTGGACCAACCCGGCCCGGGCCCGGGTATCGGGCCAGAGGTAAGTGGACTTTAATTTTT    | 4  |
| wt-30000-30120 | 250 | CTGCTAAGCCAACTCCACCACCCAGGCACACACTACACACCCACCCGCTCTCAGGGTCCCTCGGACAGCTCTAAGAAGGCACCGGTCCGCCAGTCTACCAGAGGGGGCCAA       | 4  |
| wt-30120-30240 | 251 | GAACCCAGACGAGTCCGTAGAAGGGTCTCTGTCAGCAAGAAGAGGAGTGGTAAGCGGTTACCTTCAGGGGTAAGTAACCTGACCTCTCCAGGGCTCACATAAAGGGAGGCTTAGTAT | 4  |
| wt-30240-30360 | 252 | ACATGCTTCTGCTTTTACAGGAACCTGGGGCTAGTCTGGTGGGATTAGGCTGCCTCAAGTTGCATCAGCCAGGGCTTCATGCCCTCCTCAGTCCCTAGTCCCGGGCTTCAGGCC    | 4  |
| wt-30480-30600 | 254 | CTGGACCCGGCTCAGCAACCTGCTGCCCTCTGCCACCCAGCCCTCCCGCCCTCCCGCTCCGCTGATCTCCCGGTCAGGCTCCCGGTCAGGCGGCTCCCGCCCTGC             | 12 |
| wt-30600-30720 | 255 | ACCCAGTACCTGCCCTTGGCCACGACCCCGGGCCAGGCCACTTAGACCCGGCCAAAGCCCATCCCTGAAGACCCAGCGCCATTCTCTGTTAAGCAGCAGAGAAGAAGTAGAG      | 4  |
| wt-30720-30840 | 256 | GCCCGGGCATTGGCCAGATTGAGAGACCAGTCCAGGGCCCGAGGTTGGAGCCAGCGGGCACCCGAGGTCAGCAGCCCGGTCCTCCGGGGGAGAGACAGGCAGGGCCCGCCG       | 8  |
| wt-30840-30960 | 257 | GCAGCTGGCCCGAGGAGGCCCGGAGTGGGGCCGGTGGCTGGGCTGGCCGAGCCCGGGTCTGGGAGGCTGGGGTGGCGAGCCTGCTGTCTCAGGAGGGGCTGGCTCCGCCGGGTG    | 12 |
| wt-30960-31080 | 258 | GCCCTGGGGTAAGTCTGGGAGGCAGAGGGTCCGCTAGGCCCGGGGGAAGTGGAGGGGATCGCCCGGCTCTGTTGGCAGAGTCCGGGCGATCCCTGAGACCTCCGGGCCCGGACCG   | 8  |
| wt-31080-31200 | 259 | TGCCCCAGCCCGCCAGACAGCCAGGCTCCAGGAGGTCGGGATCTTACAGGACAGCCAGGCTCACACACAGGCCCGCCAGACCCGGTCTCGGCCAGCCGAGCCAGCCG           | 8  |
| wt-31200-31320 | 260 | CCCCCGCCTGGCGCTCTCGGGCCAGCCCGGGGTTGGTCTGCCCTCTCTGTCTTACAGGAAACAGGACCTCGGGCACCCAGGCCCTCCGGCCCGCTCCAGGGCCG              | 12 |
| wt-31320-31440 | 261 | CCTCTGGTCTCCGCTCCCTCTGAGCCCGTTAAACCCAAAGAATGTCTGAGGGGAGCCACCTCGGGGCCAGGCCAGAGTCCAGAGGTTCAGGGGACCTCAGGGTGCCTCCCGG      | 8  |
| wt-31440-31560 | 262 | GTCCAGGCCAGCCGAGGACCCCGGCGAGCCCGGGCCCGCCAGAGGCCGGTCTCTGCCCTTCCCGGGCTTACAGGCCAGGATGTCCCCAGAAAGGACCCTAGGCGTCCCTCT       | 8  |



|                |     |                                                                                                                           |    |
|----------------|-----|---------------------------------------------------------------------------------------------------------------------------|----|
| wt-31560-31680 | 263 | CCTCCCTCCAGGCCGAGCCTCTCCCTCGCGGAGAGGGGCTCTTTGGGCCCTCAAGTCCAGCCACCAGAGCCGAGTGGCCGGATCCCCACGGCCCTTCTCTGTGCCCT               | 8  |
| wt-31680-31800 | 264 | GCTCCTCTCAACCTTCGCTCCACCCTAGACCCAGTCTTGGCTCCCGGGTCCACCAGGCCAGCCGAGGACCCCGGAGCCCGGCGAGTGCCTTCCCTTCCCTTGGCTCTC              | 8  |
| wt-31800-31920 | 265 | CTTCCGCTCCACCCGAGCCCTCAGCTTGCCTCCACCGGGTCCATCAGGCCGGCCGAGGGACCCCGGCGCCGGTGTAGTCCCTTGCAGCCGCCAGTCTCTGCCTCA                 | 12 |
| wt-31920-32040 | 266 | GGCAAGGGGCCAGCTTTTCTCCCCAGCCTGAGGCCAGTCTCCTGTGCACTGTCTGTAAGTCCAGCCTCCACGCCCCGTCACGGCTCCCGGGCCAGCCTCGTCCACCCCTCCC          | 8  |
| wt-32040-32160 | 267 | ACGGTGGACAGGCCCTCTGTCCACCCGGGCCATCCCCGCCCTGTGTCCACCCAGTCCCGTCCAGGGGGGACTTTATGTGACCCTTGGCCCTGGCTCCCCATAGACTCCCATGTAAG      | 8  |
| wt-32160-32280 | 268 | CCTGCTCGAGTAGTGCCTCCAGAGCCCTTTGCCCTTGGCGGCCAGCCGAGCCCGGGCCGCCAACTTTGTCCAGATGTCAGGGTCCCGGAGGTGAGGCCAGCC                    | 8  |
| wt-32280-32400 | 269 | CTCCGCCCCCTGTCACCTGCCCGTCCGCCCCGAAAAAGTAGAGCTTCCAGCTGCGCCGAGCCCTGTCACCCAGCCTGCCAAAGGCCAGATCTAAGGCCGGGAGAGCC               | 8  |
| wt-32400-32520 | 270 | CCAAAGCGGGTGCAGTAACAGGTAATCTCTGGTAGTGATTTGGACCCGAAATCTGACACTTTAGAGCTCTGGAGGACTTTAAACTCTAAAATCAAACCTTTAGAGGGCAATGGCGCC     | 4  |
| wt-32520-32640 | 271 | ATTTGTCCCACGCGGCATAATGGCGGACCTAGGCCATAAACCCAGGAAAGCGGGTCTATGTTGGCTGCGCTGCTGCTATCTTAGAGGGGAAAAGGAATAAGCCCCAGACAG           | 4  |
| wt-32640-32760 | 272 | GGGAGTGGCTTGTGTGACTTACCAAAGGTGAGGCCAAAGGGGTTGCGGTTGTAGGCCACCTTCTCAGTCCAGCGCTTACGTAAGCCAGACAGCAGCAATTTGCACTTCTA            | 4  |
| wt-32760-32880 | 273 | GGGAGGGGACCCTGCCCTGTATAAGTGGTCTGCAGCTATTTCTGGTGCATCAGAGCCGAGGATCCACAAATGTAAGAGGGGTTCTTACCTCTCCCTAGCCCTCCG                 | 4  |
| wt-32880-33000 | 274 | CCCTCAAAGGACTCGGGCCAGTTTAACTTTCCCTTCCCTCCCTGCTTGGCCCTGCTTGGCCCTGAGCCGCGCCACCTTACACCCGCTGACTCCGCTCAAAGCCTAAAGCCGGGAGAGCCGA | 4  |
| wt-33000-33120 | 275 | AGTGAAGGCCCTGGACCAACCCGGCCCGGGCCCGGATCGGGCCAGAGGTAAGTGGACTTTAATTTTCTGCTAAGCCCAACACTCCACCACCCAGGCACACACTACACACC            | 4  |
| wt-33120-33240 | 276 | CACCGTCTCAGGGTCCCCTCGGACAGCTCTAAGAAGGCACCGGTCCGCCAGTCTACCAGAGGGGCCAAGAACCAGACGAGTCCGTAAGGGTCTCGTCCAGCAAGAAGAGGAG          | 4  |
| wt-33240-33360 | 277 | GTGGTAAGCGGTTACCTTACAGGGTAAAGTAACTGACCTTCCAGGGCTCACATAAAGGGAGGCTTAGTATACATGCTTCTGCTTTTACAGGAACTGGGGGTAGTCTGGGTGGGA        | 4  |
| wt-33360-33480 | 278 | TTAGGCTGCCTCAAGTGCATCAGCCAGGGTTCATGCCCTCCTCAGTCCCTAGTCCCGGGCTTACGGCCCTCCGTCGCCGCTCCAGAGACCCGGGCTTACGGCCCTGCCTCTC          | 4  |
| wt-33600-33720 | 280 | CTCCCCCTCCCGTCCCTTTCGCTCTGATCTCCCGGTCGCCAGTAGGGCCGCTGCCCTTGCACCCAGTACCTGCCCTTGGCCACGACCCCGGGCCAGGCCACTT                   | 8  |
| wt-33720-33840 | 281 | AGACCCGGCAAGCCCATCCCTGAAGACCCAGCGCCATTCTCTGTGTAACGAGCAGAGAAGAAGTAGAGGCCCGGGCATTGGGCCAGATTGAGAGACCAGTCCAGGGGCCGAG          | 4  |
| wt-33840-33960 | 282 | GTTGAGCCAGCGGGCACCAGGTCACGACCCGGTCCCTCGGGGGCAGAGACAGGCAGGGCCCGGCGAGTGGCCCGAGGAGGCGCCGGAGTGGGCGGTGCGCTGGGCT                | 12 |
| wt-33960-34080 | 283 | GGCCAGCCCGGCTGGGAGGTCGGGGTGGCAGCCTGCTGTCTCAGGAGGGGCTGGCTCCGCCGGTGGCCCTGGGTAAGTCTGGGAGGCAGAGGGTCCGCTAGGCCCGGGAA            | 8  |
| wt-34080-34200 | 284 | GTGGAGGGGATCGCCGGGCTCTGTTGGCAGAGTCCGGGCGATCTCTGAGACCCTCCGGCCCGGACGCTGCCCTCAGCCCCAGACAGACCCAGGGTCTCCAGGCAGGGTCCG           | 8  |
| wt-34200-34320 | 285 | GCATCTCAGGGCAGCAGGCTACCACCCAGCCCGGGTCCGGCCAGCCGGGCTCCGCGCAGCCGCGCCGCGCCGCTGGCCCTCCTCGGGGCCAGCCGCGGTTGGCTTCG               | 12 |
| wt-34320-34440 | 286 | CCCTCTCTGTCTTCCAGAGGAACAGGGACCTCGGGCACCCAGAGCCCTCGGGCCCGCTCCAGGCCTCCTGGTCTCCGCTCCCTCTGAGCCCGTTAAACCCAAAAGATGT             | 8  |
| wt-34440-34560 | 287 | CTGAGGGGAGCCACCTCGGGGCCAGGCCAGAGTCCAGAGGTCAGGGCACCTCAGGGTCCCTCCCGGGTCCAGGCCAGCCGAGGGACCCCGCAGCCGGCGGCCAGAGG               | 12 |
| wt-34560-34680 | 288 | CGGTTCTCGCCCTTCCCGGGCTTCCAGGCCAGGATGTCGCCAGAAAGGACCTAGCGTCCCTTCTCCCTCCAGGCCGAGCCTTCCCTCGCGGAGAGGGGCTTTTG                  | 8  |
| wt-34680-34800 | 289 | GGCCCTCAAGTCCAGCCACCAGACCCGAGTGGCCCGGATCCCCCACCGGCCCTTCTCTGTCCCCCTGCTCTCTCAACCTTCGCTCCACCTAGACCCAGCTTCTGGCCTCC            | 8  |
| wt-34800-34920 | 290 | CCGGTCCACAGGCCAGCCGAGGGACCCCGGAGCCCGGGGAGTGCCTTCCCTTCCCTGGCCTCTCTTCCGGCTCCACCCGAGCCCTCAGCTTGCCTCCCAACCGGGTCC              | 12 |
| wt-34920-35040 | 291 | CATCAGCCCGGGCGGAGGCCACCCCGGGCCGGTGTCAAGTCCAGGCTTCCAGGCTTCTGCTCCAGGCCAAGGGCGCCAGCTTTTCTCCCCAGCCTGAGGCCAGTCCCTG             | 8  |
| wt-35040-35160 | 292 | TGCAGTGTCTGTAAGTCCAGCCTCCACGCGCTCCACGGTCCCGGGCCAGCCTGTCACCCCTCCACGCTGGACAGGCCCTGTGCCACCCGGGCCATCCCCGCCCTGTG               | 8  |
| wt-35280-35400 | 294 | CCAGCCGACCCCGGGCGCCCAAACCTTTGTCAGATGTCAGGGGTCGCCGAGGGTGAAGGCCAGCCCTTCCGCCAAGCTGCTTTGATTCTGGGATATTTGGGAATGGTGT             | 4  |
| wt-35400-35520 | 295 | TAACCTTCTCCCTTGTATTGCTATTCAATCAACCTGATCCCCCTGCTCATACCTCCACTTACAACCAAGCCACTACGGCCACGTCGCCCGGCTCCCGCTCGGGTAAGTGTCTTTCA      | 4  |
| wt-35520-35640 | 296 | TTTTAGCCCGAGCCCTCTCTATAAGTCTAGGCAACCTCCAATCACCAGCCACTTCCAATGTAGTCTTAGAGAGTGGCTGCTACGATTAGAGACCCTTGGCCACCCACA              | 4  |
| wt-35640-35760 | 297 | GTAACCAACCAGCCCAATCTGTCTACATAGAAGAAGAGGATGAAGACTAAGTCAAGGCTTACCCAGGTTAGCCAGGTGATTTGTAATTTCAAGTTTAACTTTCTTCCAATCAAGCTTTCC  | 4  |
| wt-35760-35880 | 298 | AGCCTCCGCTTGTAGTCTAGTTATGGGTTTTCCATGGGGACTTAGTATCCGTTCTATTAGATTAACGTGCAAGACGCTAAACTTAACCAAGGTGAGCCAAAGGGACGCGTGTATCC      | 4  |
| wt-35880-36000 | 299 | CAGGCTGCCACCCTGAGGATTTCCCCCAAATCCTCCTACCCTCTTTATGCCATGTGTTGTTGGCTTGTGTTAGTGTATGTAATGCGTTGCCCGCAGGTGGCAGCCTGTTTAT          | 4  |
| wt-36000-36120 | 300 | AGATGTGCAGTACCCTTAATGTTAGTCTGCTTTAGGGTCCAGGTGGCGCAATCAGGATTAATTCACCTGTATCCCTTTCCCTCCACCCGAGTAACCCAGCACTGGCGTGTGACG        | 4  |
| wt-36120-36240 | 301 | TGGTGTAAAGTTTTGCCTGAACCTGTGGTGGGCGAGTACATGCCAAACCTTCTAAGCACCAGGCTGTGTTTGTCTTATCTGCCCATCATGCCTACATTTATCTTGGCTTAC           | 4  |
| wt-36240-36360 | 302 | ATGGGGGACAAACATATCATCTAATTTGTTGACACGGATAGTCTTGGAAACCCGCTCACTCTCAGTAATCCCTCGAATCCCTACCAGGAACAAGTGCAGACACTCCATTAATTTCACTAA  | 4  |
| wt-36600-36720 | 303 | CTGCTATGCAATGCTTTGGATGGCTAATATATTGTAAGACAATCACGGGGTACCAGGGGCTTATTTTGGCACAAGGCCCAAAACAGCCCTCAGGCCAGGTTGGTCCAGCCATG         | 4  |
| wt-36720-36840 | 304 | TCCCCCTTACGCCCGACAGCACCACCTTTGTACCTCTGTACAACCGAGGCTTACCCTCCACAACCACTCATGATGCCACCAAGGCTACCCCTCTACCCCTTGCACCTG              | 4  |
| wt-36840-36960 | 305 | CAACTAACGGTGCACCAAGGCCTACCCGCTCCTACCCTTGCACCCACACCACTACTCAGGTTACTCAAAGGCCCTACCGAACTTCAACCCACACCATACCCACCGCATGATC          | 4  |
| wt-36960-37080 | 306 | TCCCTGTCTGATGTGCCAGCAATCAATGCACCTCTACTCATCAAAGCACCCTAAATGATCCAGATAGTCCAGAACCAGGTCGCCGACTGTATTTATAACATTTCCACCTATGC         | 4  |
| wt-37080-37200 | 307 | CATTACCCCTCACAATTTGCCACCAGCAGCACACAGCCACCTCCAGGGGTCACTCAAGCACAACAAATACATCATCTACCCTCGGGGCCACCATGGTGGCCACCATCTGCG           | 4  |
| wt-37320-37440 | 308 | GACCTTGAGACAGACGCAAAACCTCCAGTCTAGCATGCCTGAACCTAAGTCCAGTCTCGGTTCTCATCAGGGACAAGGGGCTGGGACTCACCACTCTGGCCATCCAATGCCG          | 4  |
| wt-37440-37560 | 309 | CCCCGTTGTAGAAATTCACACAGGCAACCCCTAACGTTTACCAATACATGAACCGGAGTCCATAATAGCCAGAGGCTCCCATCTCTTCCCGATGATTGGTATCTCCATCTA           | 4  |
| wt-37560-37680 | 310 | TAGACCCCGCAGACTTAGACAAAGTTGGGATTACATTTTTGAGACAACAGAATCTCCTAGCTCAGATGAAGATTATGTGGAGGGACCCAGTAAAGACCTCGCCCTCCATCCAGTAAA     | 4  |
| wt-37680-37800 | 311 | AACCTTGCCTCTCCAGCAACCAATGATCCCAAAATAAATTTACTCTTTTGTCTTAAACCTGACAGCCTGTCACTTATCAATTAACAAGGGGAAAAGGTTTGTATTTCCAC            | 4  |
| wt-37800-37920 | 312 | CAACACGACCCCAAGGAGGCTTGCAAAATTTGGCTTGTCTCAGCCTTCCAGGCTTCCAGCAACTATAGCATGGTGGCAGCTCAACTCGCCGCTTACTGCCAGCTACTCTCCAC         | 4  |
| wt-37920-38040 | 313 | TCCAGTCCATGTTCCGACTCCTATGCAATTTCTGCCCTCCCACTTTTACCAGTCCCAACCCAAACACACACAACATAGAATTTGTTAGTTTAAACAGTTTATTGATGGTGGCT         | 4  |
| wt-38040-38160 | 314 | GCTTTTAGCCTAATTTGTATTGCTCTGTTGCCAAAACCTGTTGTAAGGGCCGACCCGCAACATGGGAAAACATAACCCCGCCATCCCATGGGAGGGTAGAGGGTGGATG             | 4  |
| wt-38160-38280 | 315 | TAGGTGAGTAGTGAAGAAGCATGGCGAAGTAGACAGGTTACTTTTAGAGTGTAGTACAGGGCCGGGCGCAACAGTGCACCAACCCGGGCTGAGCATTCCATGGGCAGCAGGGAC        | 4  |

|                |     |                                                                                                                        |    |
|----------------|-----|------------------------------------------------------------------------------------------------------------------------|----|
| wt-38280-38400 | 316 | ACTGCACTACCGCCAGTCTGGGGCAGCCGGGGTTCTGGCGTCCGGGGGAGCCGGGGCGCCGGTGGGTCCGCTGGGCCGTGCCCGCTCCGGGTGGGGGTGGCCCCGTGG           | 12 |
| wt-38400-38520 | 317 | GCACCGCTGCGCCGCCAGTCTGGGGCAGCCGGGGTTCTGGCGTCCGGGGGAGCCGGGGCGCCGGTGGGTCCGCTGGGCCGTGCCCGCTCCGGGTGGGGGTGGCCCC             | 12 |
| wt-38520-38640 | 318 | GCTGGGCACCGCTGCGCCGCCAGTCTGGGGCAGCCGGGGTTCTGGCGTCCGGGGGAGCCGGGGCGCCGGTGGGTCCGCTGGGCCGTGCCCGCTCCGGGTGGGGGTGG            | 12 |
| wt-38640-38760 | 319 | GCCCCGCTGGGCACCGTGCGCCGCCAGTCTGGGGCAGCCGGGGTTCTGGCGTCCGGGGGAGCCGGGGCGCCGGTGGGTCCGCTGGGCCGTGCCCGCTCCGGGTGGG             | 12 |
| wt-38760-38880 | 320 | GGGTGCCCGCTGGGCACCGCTGCGCCGCCAGTCTGGGGCAGCCGGGGTTCTGGCGTCCGGGGGAGCCGGGGCGCCGGTGGGTCCGCTGGGCCGTGCCCGCTCCGG              | 12 |
| wt-38880-39000 | 321 | GTGGGGGTGGCCCCGTGGCACCCTGCGCCGCCAGTCTGGGGCAGCCGGGGTTCTGGCGTCCGGGGGAGCCGGGGCGCCGGTGGGTCCGCTGGGCCGTGCCCGC                | 12 |
| wt-39000-39120 | 322 | TCCGGGTGGGGGTGGCCCCGCTCCGGGTGGGGGTGGCCCCGCTGGCCAGTCTGGGGCAGCCGGGGTTCTGGCGTCCGGGGGAGCCGGGGCGCCGGTGGGTCCGCTGGGCCGTGC     | 12 |
| wt-39120-39240 | 323 | CCCGTCCGGGTGGGGGTGGCCCCGCTGGGCACCGCTGCGCCGCCAGTCTGGGGCAGCCGGGGTTCTGGCGTCCGGGGGAGCCGGGGCGCCGGTGGGTCCGCTGGGCC            | 12 |
| wt-39240-39360 | 324 | GCTGCCCGCTCCGGGTGGGGGTGGCCCCGCTGGGCACCGCTGCGCCGCCAGTCTGGGGCAGCCGGGGTTCTGGCGTCCGGGGGAGCCGGGGCGCCGGTGGGTCCGCT            | 12 |
| wt-39360-39480 | 325 | GGGCCGTGCCCGCTCCGGGTGGGGGTGGCCCCGCTGGGCACCGCTGCGCCGCCAGTCTGGGGCAGCCGGGGTTCTGGCGTCCGGGGGAGCCGGGGCGCCGGTGGGT             | 12 |
| wt-39480-39600 | 326 | CCGCTGGGCCGTGCCCGCTCCGGGTGGGGGTGGCCCCGCTGGGCACCGCTGCGCCGCCAGTCTGGGGCAGCCGGGGTTCTGGCGTCCGGGGGAGCCGGGGCGCCGG             | 16 |
| wt-39600-39720 | 327 | TGGGTCCGCTGGGCCGTGCCCGCTCCGGGTGGGGGTGGCCCCGCTGGCCAGTCTGGGGCAGCCGGGGTTCTGGCGTCCGGGGGAGCCGGGGCGCCGGTGGGTCCGCTGGGCCGTGC   | 12 |
| wt-39720-39840 | 328 | GCCGGTGGGTCCGCTGGGCCGTGCCCGCTCCGGGTGGGGGTGGCCCCGCTGGGCACCGCTGCGCCGCCAGTCTGGGGCAGCCGGGGTTCTGGCGTCCACTGCACCTGGAA         | 12 |
| wt-39840-39960 | 329 | TGCAGGTGGGGCGTGGTCCCTGGACCCAGCCCCGCCATCCTCCCCAGGGCGTACCAGGCTTGCCTGGTCTGGGGTCTCTGGGGTGCCTGCATCCCGGTAGGTTTGA             | 8  |
| wt-39960-40080 | 330 | ATGGCGTGGTCCGCTGCTGCTGCGCCGGTACGCTGGATTGCGGGTGGGGGTGGGTCCCGGGAGCCCGCTCCCTGCTCCACCCGGTCCCTCCCCAGGGCGTCCCCGCT            | 12 |
| wt-40080-40200 | 331 | TGCCTGGTCTGGAGCTATCCGGGATGCTGCATCCGCTAGTCCGACCTGGTGGTGCGGTCCGCTGGCCCCACCTGGGGTAGCCCGGGGTCTGCTGTCCGGTGCACCTGGAA         | 8  |
| wt-40200-40320 | 332 | GACGGGGGGGGCAGTGGGGAGGGCGTGGTCTGGGACCCCGCCGCTGGGGCAGCCGGGGTTCTGGCGTCCGGGGGAGCCGGGGCGCCGGTGGGTCCGCTGGGCCGTGC            | 12 |
| wt-40320-40440 | 333 | ACGGGGAGGACCGCGCCGAGCCACCAGGGGCCGGGGGTGGGGGTGGCGTCCAGGGCCGACCTGGTGCCAGGAGGACCCCGCCACCCGCTTATGGGGGGAGGGCCG              | 12 |
| wt-40440-40560 | 334 | CCGAAGGACCGCGGGCGCTGGGAGGTGTGACCCCGAGCGTCTGGACGACGCTGGCAGCCGGGGCTGCCTTTCTTTATCCTTTTTGGGGTCTGTGTAATACTTTAA              | 4  |
| wt-40560-40680 | 335 | GGTTTGCTCAGGAGTGGGGCTTCTATTGGTAAATCAGGTGTGCTATTTAGCCCGTTGGGTTTCATTAAAGTGTGTACCAGGTGGGTGGTACCTGGAGGTTATCTATTGGGATAA     | 4  |
| wt-40680-40800 | 336 | CGAGAGGAGGAGGGGTAGAGTCCCGAGATTTGGGTAGGGGAGCCTAGGAGGGTCCCTCCATACAGGTTGAACAGGAGGGGGAGGATTGGGCTCCGCCCGATATACCTAGTGG       | 4  |
| wt-40800-40920 | 337 | GTGGAGCTAGAGGTAGGTATCCATAGGGTCCATTATCCTGGAGTACCTAAGCTCCGGCCCTATACACAGTGGGTGGAGTACAGTGGTTCCTAGGTTCCCTGGGGTACC           | 4  |
| wt-40920-41040 | 338 | CCCCTACCTACCTTAAGGTGCGCCACCCTTCCCTTCCGTTTTAATGGTAGAATAACCTATAGGTTATTAACCTAGTGGTGAATAGGATTTGACAGTGGTATATACCTATAGTGA     | 4  |
| wt-41160-41280 | 340 | GTGCCTACTGACTTGCACCTTTGCACATTTGGTCACTGACCGATGCTGCCACTTCTGGTGCATGACCTGGCTGTGCCTTGTCCCGTGACAAATGCCCTCAGCGTGGTGGCTG       | 4  |
| wt-41280-41400 | 341 | CCTTTGGGATGCATCACTTTGAGCCACTAAGCCCGCTGCTCGCCTTGCCTGCTCACCATGACACATAAGCCCTGCTAATCCATGAGCCCGCTTTAGGAAGCACCAGTCCCGG       | 4  |
| wt-41400-41520 | 342 | GGACGGAAAGGGGACTTGGGGTATTTCTATGTGGGGGTGGAATATGAGCAAGAATAAGGACGGCTCCTTATTAACCTGATCAGCCCGGAGTGGCTGTTTACACTAACCCTGGGG     | 4  |
| wt-41520-41640 | 343 | CTGAAGAGTGTGACAAAGGGTCAAGTTCGTCTGTGTGTTGAAGGGCAGGGGCTTGGTGGTGCATCTGGAACGGCTTACCTGGGTAAGTGTGGCATTAAAGGTTGGGATAG         | 4  |
| wt-41640-41760 | 344 | GTTTAGCCCTTTAGCTGCCATTTGCAACCGGGGTGTCAGATGCAGGTCTCCGGGTGGGCAGGCAGTACGAGATGTACGTTGTGTTGTCTTTCCCTCCACCCCTGCTGGCTGGCC     | 4  |
| wt-41760-41880 | 345 | AAATGCGACCCTCATAGAGTTGTGTTTCAAGTCTGTGCTGTTTTGCGGTGGGTATTTCTCCCTCAGTGTGGCAGCTTATTTCCCGAGTGTTCACGTAAGTGGGCTGTGGACAC      | 4  |
| wt-41880-42000 | 346 | CTGAGGGAGCGCGCTTGGTGGTATGTGTTGGAATGCTCCACCCCTCAATTTTCGCTGGCTTCTCCCTTGTAACTGATAGCATAGCCTTAGGTTTCTGTAGGTCTGTTTGG         | 4  |
| wt-42000-42120 | 347 | GTTTGTGGTTCACGTGGTGCCTAATTTGATTTTTGTTTTCTAGTCCCTTAAATACATTTGTGCCAGATCTGTAGAGCAAGATGGCCTATTAACAAGGGAGATACTGTAGCC        | 4  |
| wt-42120-42240 | 348 | CTGTGTATACGGGACAGTCTGTGCATGAAATGGTACCCTGCATCCTGTGTTGGAGCTAGCAGCAAGAGAAACCTCTCCGCCCTTTCGCGAGGACACTGTAGTTCTGCGTTATCAT    | 4  |
| wt-42240-42360 | 349 | GTGTTGCTTGAAGGATAAATGAACAAATTCAGAGACATTTACAGAAACTTGAACAGATTTATAACACACACCAGCAATGTGGATCTGGATTTTAACTCAGTATTTTAGAGATATT    | 4  |
| wt-42360-42480 | 350 | CACCGTGGAGACCCAGCCTTGGGGCGCGTGGCCTGGATGGCTGGTGCATGCATGCCTGCAGGACATTTGTTGTAACCAAGTCTACTCCTTACTATGTTGTGGACCTGTCACTTCTG   | 4  |
| wt-42480-42600 | 351 | GGGATGTTAGAAGCCAGCGAAGCCCTGGATGTTGGAATCATCAACAGGGCGCTGGTCTACATTAATGAAGACAACATTCCTGGATCCAGAAGGTTAGCTGGACTTTGTTCTTGTCT   | 4  |
| wt-42600-42720 | 352 | GGACTGACTTTGAGTCTGTTAGTTATATGTAGTATTTATTTATCTCCAGAGGAAGACACTAATCTATACATTTTCTCAGCACTTATATGAATCAGGGTCAATGGGCCTGCGGGAACT  | 4  |
| wt-42720-42840 | 353 | GAGCCAGTAGGATATTAGGCAAGGGTGCACAGTGGCCATGATATAATTTAACAAACAGTGGTCTGAGTTTTAGGCCGGCCATGGGGGCTTACAAGAATAACATGCCAATGACCCG    | 4  |
| wt-42840-42960 | 354 | GCCCCACTTTTAAATCTGTTGACAGCAGATAGCTGATACCCAAATGTTATCTTTGCGGCAGAAATGAAAGTGTGGCCATATCTACAATTGGGTGTCCTAGGTGGGATATACGCCCTG  | 4  |
| wt-42960-43080 | 355 | GGTGTCTAACGGGAAGTGTGAAGCACACAGTAAATTTGCAAGCGGTGCTTACGCTCTTCTGTTAAAATAACACAAGGACAAGATACTAAAGAAATAACTGAGGTGAGTGTGGGAAGAT | 4  |
| wt-43080-43200 | 356 | GGGAATACTATGTGTTATGTTAACGGGTGAGAGCCTATATGACGCCAGACTCGGGGGGAGGAGGAAATGGTAAGAGTATACTCTACTTATCTTTTTGACACTACATTTAACTGTTA   | 4  |
| wt-43200-43320 | 357 | TGTAACAATGTTGCTTATTTTTCATGTTCAATAAACGCTATGTTAATGATGAAGAACCTGTGTTCTTTGGAAGTGGGCCAATGGGGTAGTAGGTTTTGGGAGGGTGGCTGTAGATAT  | 4  |
| wt-43320-43440 | 358 | TCAACTGCCACAGACCCCATTTTGTCCACCTGTTACCACATTTAGTCTGCATCCAGTGGGGCAGGTGTCTACCATGGCTTTTCTAGGTGGATACCACAGTCCAGGCCCCCAAG      | 4  |
| wt-43440-43560 | 359 | GCTACCGTCTAATTAACCTCCTCATGCTCCACCCCAACCTGTGTTACTGTCGCTGATTATCTGGCTTAGCAGCCTCCAAGTTTACAAGCAAGTCCCATGCCCCTGGCTGGTCCAAG   | 4  |
| wt-43560-43680 | 360 | TCTCGCCGTTTTACGAGCCTGTTGTAGCCTGCCCCAAGTTTCGAGGTTTCCCCATGCTTCCACCCGTTAAACCAATAGCATGACAGCCAATCCAACACGAGGCAAGTTTTAAGAG    | 4  |
| wt-43680-43800 | 361 | TTAAAAGCACTACTGTTATTTTCCAAAATGAGCTGGGTATAGTTGATGATCTGTAGGCGCAGCTCATCCACATTCAGGTCCTTGTAGGCCCTGTAGATGGCATCTTCGTCGACAT    | 4  |
| wt-43800-43920 | 362 | TGACAGCCTTCTCATATACCGTGTCTCGGGGCTGACCTTATACAGAAGGCGTCCCTACTAGGTCACAGGCCAGCTCGTAGGTGGGGCTATGTTTTACATAACAGTTTCAAGCAGG    | 4  |
| wt-43920-44040 | 363 | TCTCTGGGATGTGAAGGGAGGTGCCCTGGAGCAGGAGATGCATGATTAGGCGCCCTTTCCATTTGTGCTGAAGATGGGGCAGATGGTCCACAAAAGTGTCCGGTGACCAGGTAAGCGT | 4  |
| wt-44040-44160 | 364 | AGAGAAGCTGGTGGGAAAGTCCAGCCTTTACTGCACTGGGAGCTGCTGAGCAGAGACACATAAGAGCTTGTGGTATTATCTTGTGGCAATGTTGAAGAAGGAGAGCTGGG         | 4  |
| wt-44160-44280 | 365 | TGGAGCTAAACTCCTGAGGCACATGAACCTGGGACTTATGATGCAGATCTCGCAGTACAGCCAGAGTACAGGCTGTGGCCGAAAGGAGACAGGCGAAGGCACGCCGGGGAGAGAG    | 4  |
| wt-44280-44400 | 366 | TGCACAGTGCAGTGGGAGAAACAGGCCCTGTGACATGTATGGGGTGTTCATCTACGCAGAAAATCTTTCGCCAGCTCAAAGTGGCAGAGATTTCCCTGAAGAAGTCCCGTAGTG     | 4  |
| wt-44400-44520 | 367 | AAAAATGGGATCTGTCTACACCATGTCTGGTGTGCCGGGAACATATTTGATCGGGCCACACTGCCAACCTTTCCATTCTCCAGCTCTGAGCGAGATTTCCACACCTGGACACCGACT  | 4  |

|                |     |                                                                                                                                |    |
|----------------|-----|--------------------------------------------------------------------------------------------------------------------------------|----|
| wt-44520-44640 | 368 | TCACGCTATGCGCCGAGGCGCTTTGAGGCGGTGTAGTTTCTGTGGTGCGGATGCATTAGCGGCGCAATGCGGGATCTGCCGGTCCGCTTGGCGTGCATTACGGGCATCTGGGGTGACCG        | 4  |
| wt-44640-44760 | 369 | GGCCCATCGGTTTACTTTTACACAGTACAGCTGGGAAGTTTGATAGGACTGTACCAGGTCAAGGCGGTGGATGCGCAGGACCACGTCCAGTTCCTTAGTACATCCACGAGGATTGTTT         | 4  |
| wt-44760-44880 | 370 | TGCCACTCTGGCCACTTGTGTGGATTTAAATATGTACACAAGCGTAATTAACGAGTACAGACCCCTGTCCAGATTCTGACCGGTGCAAGCGCTGCCTTAAAGGCTGGAAGCTGG             | 4  |
| wt-44880-45000 | 371 | GTGGGTAAATCTGACCAAACAGCAGCGCTCGGATTCGTGATGCTGTGGTGTATGGCACACAGGGGGTCGAGAACAGGTCCTGTGGAAGTCTTGCGGGTGCACATCTGCAGCCAGGCC          | 4  |
| wt-45000-45120 | 372 | TTAGCCTGGGGCATGGCACATCCAGCAGCGTGTGGTGTGTATGAGGAACACGATCTGTCTAGGATTTTGTGTGTTTGGCCAAACGAGTCAAGAATCAGGCTCTTGAAGCGGTCAA            | 4  |
| wt-45120-45240 | 373 | GGGTGTCCTTGGCGTCCGGTGGGCGCCAGGCTCTCGCAGATGGCCAGATGTCCTGTAGCCATTTGTGCTTAGTCAAACATGGGGCCAGGAGCAGGGCCCTCGAATGGT                   | 8  |
| wt-45240-45360 | 374 | CGCCAGCCTCGGCTCGGTGATGGACAGTAGTACAGCAGCAGGCGCATCCCGCAGCTGATCCCTCAAAGAAGGCCACGGGGCATCTGAGTGATTGACCAGGTTCCGCGCAGAGTCCCGTCCGCTAGC | 8  |
| wt-45360-45480 | 375 | TACCTAATAGTAGTCCACAGTAGTCGGCCTTGGTGTAAATTCAGGAGAGAGTCCCTCCCTTTTCGGCCCTGAGAAATGGATGCTGAACTCGGTTTCTGGTAGGCAGGTGGCAGCACAGGG       | 4  |
| wt-45480-45600 | 376 | CGGTGTACAGGCCCTGCCGACGTCGCCCTGGGACATCCTGGGAATCTTTCAGAGTTCGGGTCCAGGAGGGTAAAGAAAAGTGGGGTGGTCTGGGCCACATGGACTTGAAGCAGAAGT          | 4  |
| wt-45600-45720 | 377 | TGGCCGGGACTGGCCGCTGAGGATGGATTTCAGAACTCCAATTTGTAGTAGCCGAGGTTGGCATTCTAATCATGTCAAGAGAGGACACAGGAGGAAGCACCAGGCAATGTAAGT             | 4  |
| wt-45720-45840 | 378 | GAAGCTGGATGCAATGGCAAGAATCTGGAGGGCATGAAGGGAATCCAACCCCGGCCATGGGAAGTATTTATCAGGATGTGAAAAAGTCCATGCCTGTGATGAGGCTAGAGA                | 4  |
| wt-45840-45960 | 379 | TCCAGGCTCGTGGGCATTTAGACAGTAGTACAGCAGCAGGCGATGATCCCTCAAAGAAGGCCACGGGGCATCTGAGTGATTGACCAGGTTCCGCGCAGAGTCCAACTCCGCTAGC            | 4  |
| wt-45960-46080 | 380 | TGGCTGGAGAGAGGGACTCGTAGGTGTGGACGAGTGGTGGTAGGCTATGCCTTCTCCGCTTGGCTGGAAGATAGGAGTGGGCCATCAAAGGCCGACTGCCTGCAACTGGCTTTTCA           | 4  |
| wt-46080-46200 | 381 | GATTGTCCACGGTCCAGGCGACAAAGTCTCCATCTTTGGAGTTCGCCCGGATCTGTGCCACCTCTGTACGCCACTCTCGTAGGGGGCAGCTGGACAGTCTTTCCGGTCCAGGG              | 4  |
| wt-46200-46320 | 382 | GGTTTGGCTCGTTTGGCGTCTGTGACTTTGTGAGCCATGACACATCTGGGTGGCAAGGTGAGGCTTCTGGGTTTTAATACCGGGTCCGGCACCAGTTCCTGGACACCCGCCACAAGGAC        | 4  |
| wt-46320-46440 | 383 | AAGTGGGCTAGCAAGTCTCGAGTCTACGAAGACTCCGGGGCAGTCTTTGAGTTCCTGCGCTATGATCCACCCCAATCTCGCCCCCAATTCGCCCATCTGCCTACCGGAGGCTGA             | 4  |
| wt-46440-46560 | 384 | ACCTCCTGAATCACTGCATCTTTCTTGAAGCGTTTAAAGAAAGAGAATAGTGCCACGGGCTCGGTGGGTCCAGCGTGAGGCTTATTTTGAAGGGATATTAAAAACAGGTCATTG             | 4  |
| wt-46560-46680 | 385 | CTCGATTGTGGCAGCCGATAGCACCTAGATCTAGTGAATCATGGCAGCCCGGAAGAGAGGCTCTAGACGAGCTCAATAACGTAATTGTGTCTTTCTGTGACTCTGGTCTCTG               | 4  |
| wt-46680-46800 | 386 | GAAGTGGAGAGATGCTCCGGGGCGCATGTGTTCCAGGGGCGAGCTCCAACCCCTCTGCACCGTGAAGTGCGCCACGGACAGATTTACCACCTGGAGTTTGTCTACAAGTCTCTGGCC          | 4  |
| wt-46800-46920 | 387 | TTAAGCTGAAGAACTGCAACTACCCCTCCTCGCCGCTGTTGTGATATCCAACAACGGCCTGGCCACCACCTGAGGTGCTTTTTGCACGAGCCGTCGGGTCTCAGATCGGGCCAGAGC          | 4  |
| wt-46920-47040 | 388 | GGCCCTTGCCTGGTCTCTCAACGGATGTGACCTACCAAAGAAGTCCATCATTATGCTGGCCAGGATGACTTCAATGTTCAAAGGCCCTGGTCTCCCTGCTGAGCTTGATCTC               | 4  |
| wt-47040-47160 | 389 | CTGAATCTATGGTGTCTGCCGGCCTACATCAGGGAACACCGGACGATGCAAGTTCTGGTGTTCAGGCCGCCAAGCCAGAGCCCTCGGGTTCATGGATATGTTAGTATGAT                 | 4  |
| wt-47160-47280 | 390 | ATGTCTCAGCAACTGTCTCGGTCTGGTCAAGTCGAGGATACGGGCGCCAGAGTACACAGTGGAGGAGTCCAGGCCCTGGCGTACGCACTCGGGGTGTCTGGGACTCACACGTTAGG           | 4  |
| wt-47280-47400 | 391 | GGGCGCGGTGGTGGGACTTGGATACTTTTCAGAAGCTGAGACCAGAGCAGGCGAGTTACGCTCCTTGGAGGGACAAGACTCGGTGCGAATCCGAGGCGGCCGCTGGAAGAAG               | 4  |
| wt-47400-47520 | 392 | GAACCTCGTGGGACCCCATCCGACGGCACCAGCAGCGAGACTCGCCGATGCGCGGGAGCCATTACCGGTGGAACACGTCGCCCCGAGACCCGGGAGACGGTGGTGGGGGAGCA              | 8  |
| wt-47520-47640 | 393 | TGGCGTATTCTTGGCGGCCACACCTTATCTGGCACGGGTGCTGGCTGTCACGGCCGTGGCCCTCTCCTGATGTTTCTGAGGTGGACCTGACGTTGCAGGCCCTTGGGGAGCGGGGT           | 4  |
| wt-47640-47760 | 394 | TCTCAGGCTCTGGATCTGGGCTGGCCTGCCTGGATCTGAGCTATGTGAAATGAGGCAATTTGTGGTGGGGCAGGCCCCAGCTCTGAGGCGGCTGTGGCCTCTACGCCAGGCT               | 4  |
| wt-47760-47880 | 395 | CGCTTTTCCGAAGCCACTCTGCCGCTACTGGTGTGCGAGGTGGAGAGGCCCGGGGCGCTTTCGCTCGGGCCAGTACAGACCCAGTCCAGCCAGTCCCTGACCTCGCCCATCTTG             | 8  |
| wt-47880-48000 | 396 | GCCCGTCCCTCTGTCCCTTTCAGTGGTACCAGGTGGTGGTGTGGAGCGGTGGCCTTTTGAACGCCTTTTCTAGCTTATTTTTGGTGTGCGGTCTGTTTTCCCGCGTTTTCCG               | 4  |
| wt-48000-48120 | 397 | ATAGAAATAGCTGCCTGGATCTGCGACCCGTCCTTCTGCGAAAACACCCGGGCGGTGGCCAGGGGTTACCAGGGCTCGTGAAGAGGTTCTTGGCATTCTGTTTGGAGCTAGTAGCT           | 4  |
| wt-48120-48240 | 398 | ATGACCCCTTGTGGAGGCAAACTAGGCCTGTGGAGCGCTGCTTTGCCATCAAGAATTATGTCGGGGCTGGACTCACAAAGCTGTGTGACGGTCCCGAGCTTCTCCCGCTGGG               | 4  |
| wt-48240-48360 | 399 | CCAGTCTCACGCCAGCGAGCTCGATCCCGGGAGATTGCGACAGAGTTACACCAGCGACTGCACCTTCGTTCTGGTGTATCATGCTCGGCTCTATTGGCCTCCCTCCAGAAGAAG             | 4  |
| wt-48360-48480 | 400 | CCTCCGACACCCCTGTGGGAATCCCATTCAGTGGATGTGTAACCGCTGTTGGTAAACTCGTGCCTGAGGAGTCCCACTGTCTTCTGCTATACCTGCCGCTCTGAGGGGGGAGAA             | 4  |
| wt-48480-48600 | 401 | AGACGGCGGGGGCGTAGGGGAGGAGCTCGTGGGGCCGGGGGCCCTGCCTGAGCCGGATGTTTTCTGGCGATCGTAAGCCGCAATGTTCTCTGCTGTCTGCTGAACTGCTGCCG              | 8  |
| wt-48600-48720 | 402 | CGGGTCCCGGGCTACAAGTGTTCAGATCCACGCCCTCCAGACCGGTGCTGGCCCGGATACCCTCCCTTGGCCGTGTTTGCATGGACTGCGGTTACTGCTTGAAGTTCGAAAGC              | 4  |
| wt-48720-48840 | 403 | AGACAGGTGATAGGAGCAGGCTCAATTCCTTTAGACCCACTCTCCAGTTTTATCCCGTGACCCAGAAAGGAGAAGCATGTGCTGACCTGCCATGCCAGCGGCCGTGTACTGCTCCAAT         | 4  |
| wt-48840-48960 | 404 | GCGGCTCTGCGCGGTGGGCTGCCAGAGGCTGGCTGAGCCACCGAGCCCGCTCGGGTGGCCGGCCGAATCCGGGCGAGTCTGCCGACACAGCCGCTACGAGCTCGACCGTGCT               | 12 |
| wt-48960-49080 | 405 | CCCGCTCTTGGATGCCATCATCCCTGCTTGGGACCCGACCCGACTTGCATGCGGCCGCTGGTCTCGGGGGGTGACGGTCAGGCAGCTCCTGTATTTAACTTTGCGGACAGAGGCCA           | 4  |
| wt-49080-49200 | 406 | GAGCCGTTTGTCCATCTGTGAGCAACGCCAAGCTCCAGAGGACGCCGCGACGAGCTCACCTGTTCTCCTCTGTTAGAGGTAGAATTGCCACCTGGTGGCGGTGTGCGGGTGGC              | 4  |
| wt-49200-49320 | 407 | GTCTCTATCAGACGCTTATGGCAGCGCGCTGCCAAGCCACCCTCCAGGGGAGGCTGGAGGCGGATTTCCAGACAGTCCCTGCTTCTAAATTTCAAGAGCTGAACAGAATAAT               | 4  |
| wt-49320-49440 | 408 | CTCCCAATGATGTTTTTGGGAGGCTCAAGAAGATTACCTGGATTTCTGACATCCAGTTCGCTACGAAGAGTACGTCAGAGGACTTTTGGGGTGCCTGGCGCCAACGCGCCATA              | 4  |
| wt-49440-49560 | 409 | GACAAGAGGCGAGAGCCAGTGTGGCTGGGGCTGGTCTATGCACACTTGGCGGTCATCCGCCACCCCGTCCAGCAGGCTCAGGCCCGCCGATCCGCTGGGACCGGGGCTTGGCA              | 8  |
| wt-49560-49680 | 410 | TCATCAGCGCGTCCACGGCTAGCCAGTCCGCGACCCCTGTGTTTCTCATATTAGCAGCTCCGGGCGCGACTTCGGGGCGGACTCCGGCCGCTCCGCGCCGCTCCGCGCCGAGCGCTC          | 8  |
| wt-49680-49800 | 411 | GATACCGGTCAGGTGGCGGGGACAACCCACGACACCCGCCACCGGGGACAGTAAGAAACAGTAGAGGACACGAAACATGGTGTATGCACTTTAATAAAACAATTACAGATACA              | 4  |
| wt-49800-49920 | 412 | AAAATGAGTCTCTCAGGCTCGCATGAGCGGTGGTGGAACTCCAGCTTGGCGGAAGCTGGCTCACGAAGCAGACAGTACTCGGCTAGCTGACTAAGGGTGGGCTATAAC                   | 4  |
| wt-49920-50040 | 413 | GCAGTCTGTTCCGGGGCGGGCTGGATAGAGAGGAGGGGATCCGGAGGGGACCACTAGGTCGCCGGAGGTCGACCTCCTGTACCACCTCCCTGATAATGTCTCAATAGACAGAA              | 4  |
| wt-50040-50160 | 414 | ATTGGGTGACCACTGAGGGAGTGTCCACAGTAATGTTGTCTGGCTAGATGGCGGGGTGAGGCGACGCTTTGCGAAAACGAAAGTGTGTTAAAAGGCGGGATAGCGTGGCTG                | 4  |
| wt-50160-50280 | 415 | CGGATGGCGGTAATACATGCTATCCATTACATTTTGGCATTGTCGAGCTGGGAGCGGGGATGGGGGCTCTTTTTCGACGGTGTATGTTTGGGACCCGATGCGGCTAGG                   | 4  |
| wt-50280-50400 | 416 | ATAGGCGACCTCGGGCCGCGCCAGGCTCCGAGCCGGAATGCAATGGGGCAATGGGATTGCGGGGATTTGCTGTCTGCTCCTGACAGGAGACACCGCGCGGAGATGACAG                  | 8  |
| wt-50400-50520 | 417 | CCGACGGCGGGCCGGTGGGCTGCCCCGAGGACGGGCGCCGGCCGACGCGCCCGTGGCTTTGGCACGGGCTGGACCCACCGCTTAATTTGGGGGTGGGACGGGAGCTG                    | 12 |
| wt-50520-50640 | 418 | CATCTGGGGCTTTGTGCTTGCCTTTTTGGGGGCGCGTGCCAATGCACCACTGGGGTGTGCGCCGGGCGGCCAAGCCGACCCAGGGCGGTGCTGGGGATGGAAAGCCGG                   | 8  |

|                |     |                                                                                                                             |    |
|----------------|-----|-----------------------------------------------------------------------------------------------------------------------------|----|
| wt-50640-50760 | 419 | ACGGGCGTCTCCCGGGTGAACGCTGGAGTAGCGGAGGCTGCTGCGCGGGCCACCACGCGGCGCAGGGGTGCGAGCCGAGGGCGTGGGGAGGCGGGTGGCGGAGGGCCGAATCT           | 12 |
| wt-50760-50880 | 420 | CCGCGGCTTCTCCCGGCCCTCGCTGTTCTTCTCCCGTTGCATGATAGAATGCCCATAGGGTGGTCTCGAGAGGAGGCTTGTGTCTCGGGGCTGGAGCCAAAAGTCGTTAAAG            | 4  |
| wt-50880-51000 | 421 | ATGCCGCTGATGGTGTGGGAGCTATGCCTCCCGTCGACTGGCCGGCTTGTAGGGGGCTGAGGGTGGATAACTGGGCTTCTGTGAAGGCACCAACCCCTGGAATCTGGATGGTATGTTTCT    | 4  |
| wt-51000-51120 | 422 | TCTGTGACCCCGAGGCAGTCGATGGTGTAGAGTGTGGAGACAATGTGTAGACGATGGGCCCTTGTTCAGAAAGCCAGGGAAGCTTGAAGGGGGCTGTGTGGTCTGGTGGGGAAGGAGCT     | 4  |
| wt-51120-51240 | 423 | CCAGGGAATCTTTGGGCCATGGCTTGGGAGCCTCCCGGGAGCCGCTTGGGCTCTCGGCAAGCCCTCGTTTCGGCCCGAAATAGGGCTTGGCATCAATCGGGGGCTGGGAGAGTGA         | 4  |
| wt-51240-51360 | 424 | TGGGGCGGCCAATCCCGGGTAACTGTCACGTCCCGGGGAGGAGGTGAGAGACGCAAGCTCCCTGGGCTGCCAGGGGCCACCTTCTAAGAGGGGCTCTGTGGGCTGGGAGGGC            | 8  |
| wt-51360-51480 | 425 | CAGAGGCCTCAGATTACGACAGTAGTCTCCCTTTCCCGCTTCCCGCTCTCCCTCCTCCAACTGCTGGAGCCGCTGGAGGAGGGCCGGGTGTATCTGCTGACTGAAACCCCTGCC          | 4  |
| wt-51480-51600 | 426 | CGTGACCAGTCCGTGCCACCCTTGGGGGAAACCGGAGAACAGCTCCTGGACGTTGCGTGGATTGGGGGAAAGCTGGTATCCAACCGGCACTGGAGGATCTCGTCTCGTAGAAGG          | 4  |
| wt-51600-51720 | 427 | AGGGGTGAGTACATCGGTCCGCCATCGTGAAGCCCGGGCCGCTTAAAGTAGAACTGCACGTCGGCGAGATTGGCCGATAGGTGAAACACTTCCAGATGATGTTTTCTGTGGCCA          | 4  |
| wt-51720-51840 | 428 | GGATGGCCACGGTGGGGGGCTGGCCCTCTTAGGTTTGGCGCCCTGGCCTCGGTGAGAAGCTCGCGTAGCCACACGGCCTGGCGTGCAAAAGATGGACATCTCGCTCGAAAGACTCGG       | 8  |
| wt-51840-51960 | 429 | AGTAGCCGTCAGGTCCTGCAGAAAATTCAGCGAGATGGTCTCCACAGGGACCGGAAGGGCTCAGAGTCCCGTCCGAGTAGAGGAGGGGCAACGACCCTGACCTGTCCAGGGTCT          | 4  |
| wt-51960-52080 | 430 | TCAGGTTAAACAGATATTGAGAGGAGACAAGAGAGTTAGGGGCCGACCGAGGAAGGCCCGCCACGCGCCCTCAAAAACGGAGACGGGATGGTGTACCCGGAGCCCTTAGGAC            | 4  |
| wt-52080-52200 | 431 | CGGTAATGGGAGTGCCATAAAGCATAAGATTCTCAGGGCCCGGGTAAACGGTCCGCTAGGAAGACGGGTTTCGCGGGGACCTCGAGTCCCTCCGCCCTGGGAGCTCTTCTCCGC          | 4  |
| wt-52320-52440 | 433 | GGAGCAGCATGCAGGCTCGGGCGGGCCGCTACTTTGGTTGGACCAGGCCAAGAAGCTCGGGTGCGGCCAGAGGGCGGCTGGGTATCCATCTCTCCAGGCGCTCGGAAGAAGA            | 8  |
| wt-52440-52560 | 434 | TGAAGCCGGTGGGTGACCGGCATGCGGTGGCGGGTGAAGCGCCGCGCTTCCCGCTGTTGCTGCGCGGGTGGTTGAGGGCATGCCCCCTCCCGAGGCTGGACTCCTGACCA              | 8  |
| wt-52560-52680 | 435 | GCCTGTAGGTGAGGACCGAGTCCGACAGGAGTCTCCAAACCCCATCTCTCGTAGAGCCGAGACAGGGCGGAGTCTCGGTAGAACGATGGGGCGCCAGGAAGCGGCGAGCGTAGG          | 8  |
| wt-52680-52800 | 436 | CCGGATGTGTGCCACCGACGAGCCATCATCTCCCGTTTTCCTCAATAAGAATAACTTCCCGGCTGTGGCCGGGCTGGATAAGGGGGGTGATTCCAGAGGCGATGAGACTGGCGTGGC       | 4  |
| wt-52800-52920 | 437 | CTAAAAGTGTGATGCCACAATGGGTTGTCTGCCAGGCTTCCATCAGGGCTTGGGCGCAGAGACGTATTCCCGAAGCAGCTCCCGGGCTGGACTCCACGTCGGGCCAGGTGTCCC          | 4  |
| wt-52920-53040 | 438 | AGTAGGAGTCCGCGGGCGGGCTGAGCGGGCGGAAGCTACACTGGCCAGGGTCTTCTCTCTCTCTTGGTATCCTCGGGGGACCAATAGCTTGGGGCGTCCGGCTGGGGTCA              | 8  |
| wt-53040-53160 | 439 | GGGAAAAGCCCTCGGGTCTCCACGACCGTGGGCATGACATATTCAGAAAGTTGGGTAGACGGGGATGTAGTTGAGCGGCTCCTGGTGTCTCGGGAGACGTAGCCGGGTTAAGGG          | 4  |
| wt-53160-53280 | 440 | GGTCCGAGGGAGACTGTTTCCAGCCAGAGGGTCCCGCGTATTTCCCGGGCCCTGCCCGCCGAGAAATGTGCCCGGGGTGGGGCTCCATTGCCCATCCAGTTGGTGGTGGCGG            | 8  |
| wt-53280-53400 | 441 | AAATCGTATGAGGAGGGCAGGTGTGGTCAAGGGATGTTAACGAAACGGTAGGGTGGCGGCTCTGCTAAAAGCCAGGAACTGCTTGGCCGATGGCATAGCCAGCAGCTTGT              | 4  |
| wt-53400-53520 | 442 | CCTTAGGAGGGCATACTGGGAGCCAGCCAGGCCCAAGCGCCAGGCCCTGGCAGCCTCCACCAGTATCTTGAAGTGGCGGGGTGGTGTGGCCCTGGCTGGGTGACCAGATCCT            | 8  |
| wt-53520-53640 | 443 | GCAGCGTTCCTCGAGCTGGACTCTTCTGGGCTCCTGGATGATGGCTCCAGTCCGGAGAGGGCGCTTTCCAGTCTGCGACGGTCTCCTTCCCGCCGCGACCCGCTTGGGTCCA            | 8  |
| wt-53640-53760 | 444 | ACGTGGCCAGAGCCAACTCAGCTCCTCCATGCCATCCATGGAGTTCTGGGCCATGCCCTCGACTCCAGGAGCCGTGTAGCTCATGAATTCACCGTACCGCGACGGCGTAGGTTCA         | 4  |
| wt-53760-53880 | 445 | GCCAGGCACCCGCGCCCAAGCTAAGGCCAGGGCTCCTTCGAAAGACCCCGCAGGGCTCCGAGATGCCCGGATCCACTTGGCGGCTGCCAGGGATTTCCGGTAGGGCCATGAGCCGT        | 8  |
| wt-53880-54000 | 446 | TCCCGCCGCTGCCCGGGCAGGGCGGCTCGAGGGAGGCTGGACAGGGCTTGGCGGGGAGGGAAGCAGGCTCCGGAGTTCATCGTGGGGGCTTCGTCGCTGACCTGGAGAGGA             | 8  |
| wt-54000-54120 | 447 | CGGCTCCAGAGCCGTGTGAAAGCCCGCCGAGTGTCTGGCGGCTTGGCGGCTTCCGCTTCCGCTTCCGCTTCCGCTTCCGCTTCCGCTTCCGCTTCCGCTTCCGCTTCCGCTTCCGCT       | 8  |
| wt-54120-54240 | 448 | CCTCGGTGAGCAGCTCCGAGAAGAAGTCCCGTGGGCTGGAGGAGATCGTCCGCTCTCGCTTGTGAGCAGCTGGGGCTTCTTAGGCCAGAGCGCCGAGTCCGAGGCCAGCTGGGCG         | 8  |
| wt-54240-54360 | 449 | GCGCAGGGCCGAACGGATGGCATCGCCGCGCTCCTGGCGGAAAGAGGGCCCGGCCGCTTCCCGCTCCTCGCCCTCCTCCTTCTTGGCGGTAGCCGCGGGGTGGCGGGCC               | 12 |
| wt-54360-54480 | 450 | AAGCGTCCAGTCTGGCCAGAGGGCCGCTCGATATCCGTGAACAGCCGGTTCGCGGCTCCATTCTCTCCGCGCACCCATCGTCCACGAGCAGGGATCGCAGTCTCTCCCTCC             | 8  |
| wt-54480-54600 | 451 | TCACCTCGTATTCCCAATAGCATAGCGCAAGGATCTGTGTAGGGAGTCCAAGATGTCCGTGTTCTGGCTACTCCGCGCTGCTGCCGCGCTGAGTCCGATTTGTCTGGCAGCA            | 4  |
| wt-54600-54720 | 452 | GGGAGGCAGCAGGGTGTCCAGTCAATCGGCGAAGTGGAGCGGGCTCGGGCGTCCCGCCAGCCGCTTCCGCTTCCGCTTCCGCTTCCGCTTCCGCTTCCGCTTCCGCTTCCGCT           | 8  |
| wt-54720-54840 | 453 | TCCCTCGTATTCCCAATAGCATAGCGCAAGGATCTGTGTAGGGAGTCCAAGATGTCCGTGTTCTGGCTACTCCGCGCTGCTGCCGCGCTGAGTCCGATTTGTCTGGCAGCA             | 4  |
| wt-54840-54960 | 454 | GGGAGGCAGCAGGGTGTCCAGTCAATCGGCGAAGTGGAGCGGGCTCGGGCGTCCCGCCAGCCGCTTCCGCTTCCGCTTCCGCTTCCGCTTCCGCTTCCGCTTCCGCTTCCGCT           | 8  |
| wt-54960-55080 | 455 | TCTCCTGTCTCCTGTTCTCGAGCTTCTCCTTTTCCCTTCCGCGGGTCTCCATAAGCTGCCGAGCTTCTTCTCATACTGTCGCTTGGAGCTTCTTGTGGGGGAGTGTCCAGAAAGG         | 4  |
| wt-55080-55200 | 456 | CCTCGAGCTGTTCTCGGTGGCGGGCTTAAAGCCTTCGGCTCCAGGCGCCAGGCTGCACCTCCTTCTGCTGAGCTGATCGTTGTTGTTATTCTCAATTTCTGCAGGTAACCTTAGGA        | 4  |
| wt-55200-55320 | 457 | AGCGTTCCTTGAAGCTCCCTGGGATGAGCGTTGGGAGAGCTGATTCTGACGCCAGAGAGTAGTCTCAGGGCATCCTCGGAGCCTGACCTGTGATCGTCGCATCATAGACCCGCACTA       | 4  |
| wt-55320-55440 | 458 | GACCTGGGAGCAGATTCACCGCCGCGGCTCCTTTAAGGTGCTGTGAGTAGCAAAATTCGCAAGGCCACTAGGCGCGCTGGCTCCAGCGTACAGCCGTTGCCATCTCGAATGTGT          | 4  |
| wt-55440-55560 | 459 | GCAGGCCTCGAGACCATGGGGTCCAGGATGCGGTCAATGCCATCCTGCACCTCAGGGTCAAGGACCAGCAAGTACGATAGAGGTTGGTCTATGCTCTCCGCAAGGAGGCAATGTAGT       | 4  |
| wt-55560-55680 | 460 | TATCGATGGTGTAGAAGGTGATGGATTTCAGGATGTTTCATCAGGACTTTTTGGAGCGAAACATCTGCTGTATAGTGTACAGTGGGCGGATGACGTTGGGTTCTTTCGGCGCCCGACTA     | 4  |
| wt-55680-55800 | 461 | GAGAGATGGGGGCGCTGGGGCCGAGGCCACACCGGCCAGGCCAACATGCTCGATGTCGTCAGGATGGTGGCGAGGCGCTTTTCGTTTCTCTGGTGGTCTCGAGCTCCTTCTGTT          | 4  |
| wt-55800-55920 | 462 | TTTTCCGCACTGTCTCAAACTCTGGAAGGGGGCAATGCTGGGGTCTCCTCCTCAACTCCTCCAGGGGCCAGGGGATACCGCTCATATCACTAAGGGCGGTGCCAGGTAGAGGAGCT        | 4  |
| wt-55920-56040 | 463 | CGCGATAGTCCATTCAATGGACGTGTACCCGATGTTTAGGAGAGGCGAGGGAGGCGATGATCGGCATGTGTGCCGAGGTGTGTGAGGAGGTGTGCAAAATCCATCACTGTTGGGAGG       | 4  |
| wt-56040-56160 | 464 | TTGGGTCCTCAAGGTAGGAGAGATAATCGAGGCGCGGAGGCCACCTTGTCCCTGCTCCGCGGTACACCTGCGCAGGCTGCGAGGCGGCTTTCGTTTCTCTGGTGGTCTCGAGCTCCTTCTGTT | 4  |
| wt-56160-56280 | 465 | CAAAGGGGGGCACTGAGGCGCGGGAGGGGCCCACTATCTATCGCTGTCAACAGCGCCAAAAGCGGACGCTCCTCCTCATCTACCCAGCCTGTTGCTGGCCAGGCCGTTGGGCGG          | 8  |
| wt-56280-56400 | 466 | CCTCGCCAGGATAGGAGGCGCTTCCAGCTTTCGTCGTCAGGACCAAGGGGAGCTCCACGTCGCGGCCCTGTAGATGGAATATCCTCGGGTCTCCTCCTCCTTCCCGCCTCCT            | 4  |
| wt-56400-56520 | 467 | GATCTCCGCCGAGAGCAGGTCGGTCAAGCGCTGCGGGCCGCTCCAGGTTCAAATTTCCATCTGCTGCTCGGCCAGCTGGGGAATTTACGCCAGCATTTAGCACCCGCACTTACAC         | 4  |
| wt-56520-56640 | 468 | GGACCGCTCCTTCTGTCGAGGAGGCGGAGGCGAGGCTCCAGCTTTCGCGCCAGGCTTATGGAATCCTCCGCTCCTCCTTCTTCTGTATAGCATGTTTGGAGGTTTGGATGT             | 4  |
| wt-56640-56760 | 469 | TAAGTTCGGAAGTGAAGTGTCTCCAGGTCAGGTCGGGAGGCTCCGAGTCTTCCGACGACTCTTAAAGATCTCAGCAGATTAGCACAGACGATCGTCCAGCTCCTACTCCTTATAGCC       | 4  |
| wt-56760-56880 | 470 | CCTGCTCAGGACCACTGTCAACAAGATAGTCTATCATGCTCAAGGCATCTGCCCTCGGCACCTCCCGGTTAGAGCCCGGGTCTGACGATGAGGCTGTTCTGGTAGGTTGTCCGG          | 4  |
| wt-56880-57000 | 471 | CTATTCTCGAATGTTGCTCTCGAGGGGCAAAAGTCCATCTCAGGAGTCTCTATGTCAAAGTGGTCTGATAGTATTGGCTCCTGGCGGTGTCAGTGTGATGGGGGAGCTGGGGGAC         | 4  |
| wt-57000-57120 | 472 | TGGATCCCGATTCCAGGCTGTTGGAGAACACTCATCTCGAACATGTCTTCATCCTCTGTTGGTGGGATATCGGAGGCTAAGTGCCTCCTCCGCTTCTCAGAGTGGACATGGATAGGA       | 4  |

|                |     |                                                                                                                                    |    |
|----------------|-----|------------------------------------------------------------------------------------------------------------------------------------|----|
| wt-57240-57360 | 474 | AAGGCTCCTCTAGGTCAGACAGGTAGCGGACGAGGCGCAGAACCCCCAGATGCATCATCCCCAAAGGAGGGCTGCTGCCGAAGGGAGGTGATGGGGATATCTCCGTTCCAGCCCTGTGAG           | 4  |
| wt-57360-57480 | 475 | CGGCCGGGGGATGGTTTTTTCTGTTTCGAGTGTCTGGCTGATGGTGGGAGCTGCTGAGCAGGAGGAGAGCCGGGGTAGCTGATGGCAGGGGCTGCTGCTGAGGAGGAAGAGGAGAAG              | 4  |
| wt-57480-57600 | 476 | GAGCCCGGGCGGCTGATGGCGGGGCTGCTGCTGAGGAAGAAGTGGAGAAGGAGCCGGGGCGCTGATGGCGTGGGCTGCTGCTGAGGAAGAAGTGGAGAAGGAGCCGGGGCGGCTGATT             | 8  |
| wt-57600-57720 | 477 | GCGGGGCTGCTGCTGAGTTGGAGGAGGAGAAAGTCTGGTGGTGGGGGCTGCTGCTGACGTCGGGGAAGGGGATGGGGTGGTCAGAGGATTTTTGGGTTGAGGGAGCTGCCGTGTG                | 4  |
| wt-57720-57840 | 478 | GCAGAGGGATGGGTATTTGCAAAGGGAGGCGGAGGAGTGGAGTACTGAAGGAGCGATAGTTGAGACTGGCGCGGGTGGGGTGTGCGGGAGGCGGGTGGTATTGGTAGGGATGGGGA               | 4  |
| wt-57840-57960 | 479 | TTACTGGAGGGGAAGGCGAGCTGCTGAAGGGGGCGGATGGGGCGAAGCTGGTGGTGGGAGCTGATCATCTCTGTGTGCTAGTGGTGGAGGACAGAGGAGGCGGGCGGCGAGGTGG                | 8  |
| wt-57960-58080 | 480 | GCTTCTGTGGGGCTATCTTTGCCAAATCCCTTTTCTCTTTGGGAGTCTGAGGCGCTGACGCCCTTGGTGGCTGGAGGGAGCGGGGACCCCGGGGTTGACTGAGGC                          | 8  |
| wt-58080-58200 | 481 | CGGGGATGGGGATGAAGAGGGGAGGGCTGGAGGCCGGGGCCGGAGGCCGGGGCCGGGAGGCCGGGGCCGGGAGGCCGGGGCCGGGAGGCCGGGGCCGGGAGGCCGGGGCCGGCAG                | 16 |
| wt-58200-58320 | 482 | AGCCCGGGCCGAGAGGCCGGGGCCGAGAGGCCGGGAGACGACGCCGGGAGTTGGTCTTTGACAGACTATACCTGGCGGAGGGAATGAGTCGGATGTGAAAGATCGAGAGGGCAGTG               | 8  |
| wt-58320-58440 | 483 | GCCTGAGGTTATACGGTATTATTCGCCGTTCAAACCGTAGCATGACGGGAGGGTGTACTACGACCCGGGCGTCCCGCCGCTCCCCATCACTGGACACAAGCTCGGGCCCCACCAGGT              | 4  |
| wt-58440-58560 | 484 | CAAAGCCGCTGCCGTTGGCCTATAAAAGTCATACACGCCATAGTGTCCAGCATAAAGATCGGGGGCTCTGTCTCAAAGCCCTCGGATAGAAAATAGAGATGCACGCAAGTGTACT                | 4  |
| wt-58560-58680 | 485 | GGGCCCTGGTGCCCCACGTAAGTGCAGGATGTCGTGCGCATAGGTGCTGACTCTGACATGCGGGGCTGCTGCCGGGCGCATCTCTGGCAGTGGGGTCAAACAAGTAGAAGGAGC                 | 8  |
| wt-58680-58800 | 486 | CATCTGCTCGATGATGATGCCCCCGCTAGATGTCGCGAGATGAGAGGATGAACGGGCCACCCGTTGTAAGTGGCTGCGAGACCTCGGCCAGGACTGAACAAGTCCCGAGTTTG                  | 4  |
| wt-58800-58920 | 487 | CGATCTGGGCAGGGAATAGGACGAGGCCAAAGATCTCCGCCGAGCGGTATATGTGACGCGCCACCGCCCTCAGGACCAGGAGCTGGGCACGTCGCTCAACTGGGCCATCTCGTGCC               | 8  |
| wt-58920-59040 | 488 | CCTTGAGGATGCCGCTCTGGCCATGAGGGCATCCAGCCGCGCCCTCGTCCAGGACTCGTCCAGCTCAGGGCGGAGGTCAGGGGGCGGCCGCGCCAGGAAGCTTTGACCAGGTAGA                | 8  |
| wt-59040-59160 | 489 | GGACGAGTGTGCTGACGCACTGGATGCCGGCAAAGCGGCCAACTTGCAGTGGGCTGGTGTGACGAGGCGGCTGCTAGGATGCGGAGGGCCGAGCCTCCACTCCCGCCCCGGGGCAT               | 8  |
| wt-59160-59280 | 490 | TCACATCCATGGTCTGATTCGCGCACGCGGGCGGTTCCCGGGTCCGCTGGCTTTGCCCCAGTCGCCGTTACTCATCTTCGGCGGTGGGGCGGGAGGACGCCCTGTGCCCCCTT                  | 8  |
| wt-59280-59400 | 491 | CTGGTCCGGGCTTACGCGGCTGGCGCGGCAGCCGCCGAGAGATAAGGGGGTACGTGTGCTGCCCTCCTCTGTCTGGGCCGCCCGCCGCTTGGCCGCTTGAAGGAGAG                        | 8  |
| wt-59400-59520 | 492 | GGGTAGTCCGCGACTGCGTCTCGGGGGCAGGAGTCTCAACCTTGGGCTCGGGCCGGTGTGATATCCGATGGCCTTTCCCTGTCTTCTCTGATGCTCTTCTCTCTCTCT                       | 4  |
| wt-59520-59640 | 493 | CCCGCACGCCCTGAGATCTGCCCTCCCTCCCTCTCCCTCGTCTGTCGAAAAGTCTGAGGAGGAGAAGGAGAATGGGAGGAGTCCAAAACGGCACGCCACTGCCGTGGGGCGGT                  | 8  |
| wt-59640-59760 | 494 | GGTGACAGGTCGCCGCTGGCCGGCGCTTGTCTCGCTTCCCTGCCGTTACCCAGGAGAATGGCCGCGAGTTTTTGGCGGGGAGGATGCGGAATGGCGGGGGCTTTGCCACGGGTGAG               | 8  |
| wt-59760-59880 | 495 | GGGGAATCGTCGGTTAGGGCCGGCAGGTGGTGGTGTGGACCCGGCGCTGCCAGAAAGGCGGAGGAGTCTGGGGGTGACTGTGATCTGTTCCGGATTAGTCC                              | 8  |
| wt-59880-60000 | 496 | ATGGCGGGTGTGTATGTTTTAATAGGGTGGTCTCTGGCGCGCAGGATGATGGTCCGAGGACCTCCACCAGGGCTTGCAGATGCTCTTGCCTAGATACAGGATGTCGTCATGCTGAGG              | 4  |
| wt-60000-60120 | 497 | GGAGTGGGGTGTCTGCTCCCCCTCGGAAAGCCGCTGGTGCGGGATGAAGACAGTGGTGGCGGGCTCTCGCCGACTATGGCCTCGGCACGCTCGGCGTGCATGGCGGGTGGC                    | 8  |
| wt-60120-60240 | 498 | TGGAACAGCGGGCGAATGTGTAATCCCGAAACCGTAGGCGACGCTGCGCCTGAGGCGGCCGTCAGGCTGTATCCACAGTCCAGGGCGTGTCCACCCGCTGTTGAGCTCCTCGAGA                | 8  |
| wt-60240-60360 | 499 | TCCGACGCGAGGGGCTCGCTGGTGTGGGCCAGAGGGGGTATCCGCGATGCCCGGCTCCCTCGTAGGGGCCGACCCAGGAGGCGCCTTCTGAGGGTGGCCGTGTGGCCGTGGCCAGG               | 8  |
| wt-60480-60600 | 501 | ACCACCGCTCCTCCTCTCTTCCGTCGCGAGGGATGTCACCTCCGGTCTCTGCTGTACAGGAGCGGGCGGAGCACAGCCTCAAAGTGGCCCGTCAAGCGCGAGATGTCC                       | 8  |
| wt-60600-60720 | 502 | TCCGAGAGGGTCTCACCCGAGACCAGAAAGCGGGTGGCCAGGCCAACGACTCCGCGCTGTCGAGAAAGGCGGAGGAGTGAAGAGGAGTGAAGAGGGAGTGGCCAGGCAAGCCGT                 | 4  |
| wt-60720-60840 | 503 | GGTGTCTCCGCCCGGCTCTGAAGCTGAGATAGTCTCGGAGATGATGCCTGAGACCTCTCGGACGGCTCCATGATCCTAAGGACTGCGTGTGGACGACAGCCCCAGGGGCCCGG                  | 8  |
| wt-60840-60960 | 504 | CCCTCTGCTTCTGACACCTCGGCTCCTGCTGCCCGGCTTGCCTTCCCCCTTAAGTTGAGGGGGCGAGTCCGACCCGCTGGGGGACTCCCCAGGCATCGGAGGGGCCCGTCA                    | 8  |
| wt-60960-61080 | 505 | TAGATCTCCAGACGGTGGCGTATATGAGCTCGAGAGGACGGCGGGCCGGTCCAGCTCGGGGGAAGGGAGGGCCAGGTCGTCGCCAAGGAGACCAGCCAGCGCAGGGCGCCAGAGAG               | 8  |
| wt-61080-61200 | 506 | CGGTTTTGGCAGCTGTTGGAGAGACCCGGCGAAGGGCGGGCAGATTTGAAACTCATGAAAGCGCGCGGGAAGAGGGGCTGTGGACATAGCCGGATCCGCGCGCGCTTTGG                     | 8  |
| wt-61200-61320 | 507 | CCGGCCCTCAGGAGCCGCGATGCTCGACGCTGTGTCGCGGGGGCCCGCCACCCGCTGCCGTCCACTGCCTTCTCCCTGCTCGCGGGGAGTAGGGGGGGCTTACAGGGAGGGCC                  | 8  |
| wt-61320-61440 | 508 | GGAGCCGGGGCGGGGCTGCCACAGCGGCTGTAGCGGACCCATAGCAGAGACCTGAGGAGTTCCGATGAAAGGTCGCCCGCCACTGCTCATACTCGGCCGCGGAGGGGGGACGATG                | 8  |
| wt-61440-61560 | 509 | AAGATGCGCAGAGGGTTACGGCGTCCAAAGGTCGCCCGCCGCCACCCACAGCCGTCGCGGGCGGGGGCGGGCGGGCGTGAAGGGGGCGCTGGTCCGCGGGGCTCGTCTGTCC                   | 12 |
| wt-61560-61680 | 510 | ACGGCCTCGGCTCCGCCCGCAGGTAGGCCGCCGGGGCCACACGGGCGAAGCGGCTCGTGGGCTCGCGGTGGGACGAGTCGGAAGGAGCAGGGCAAGCCGATGACTCTCTAGG                   | 8  |
| wt-61680-61800 | 511 | AGGGCGGGTGGCTCGAGCCACTCCACCGCAGCGGGACACCCGGGGCAGAGGCCAGCATCATGGCTAGTCCCGCCACGGTCTCGTTGAGCCGGCCGAGAGCAGAACCGTG                      | 8  |
| wt-61800-61920 | 512 | GCCACCTGCTCGATGGCGGCTGGAGAGAAGGATGCCCGGCTCCCGGCCCTCCTGACACAGAGCGCCAGGGCCTCCATCTCTGCCCCATCCCGGCCAGGAAGGCTCGATGACCGAG                | 8  |
| wt-62040-62160 | 514 | GCGACGGGGGGCTTTGTCGCCCGCTGGCTCCGCGTACAGCCAGGATCTTACCGCCCGCCGGGGCAGGGGAGGAGCCACCAGCTGGAAGTACTCGGGGGGTGAAAG                          | 8  |
| wt-62160-62280 | 515 | AGACCACCACCCTTCTTACCCTCTCCCGCGGGCCCGCCCGCCACTGTGCTCCACAGCTCCACGGCATGGCCTTGATGTCGCGGGCGTGGGCTGACCTGCCCTGCAGCCGCC                    | 8  |
| wt-62280-62400 | 516 | CAGGGTAGCGGTTGGTCTCCGCGTATACGGTGACAGCCATCTCCACAGCTGTTTTGCGCGGTTAAAAGCGTAGAATGACAGCCCTCCCGGGGAAGGGCTCCACCGGGCCAGA                   | 4  |
| wt-62400-62520 | 517 | TAAGTGTGGCCACCAGCTTCCACGAAGGCAAGGTTGGCGTTGGGCCAGAGCCCGGAGCACCTCCCGCTGCCCTTCCGATGATGCGCCGTTACGCGGGCCAGGGCCCGGGTCC                   | 8  |
| wt-62520-62640 | 518 | TCTGCGATGAGCCGAGAGCCGTCACCGGATCGTGGTGGCCAGGAGGCTGTGCTGGGGGGCAGTAGGATGCCAGCAGTCCAGGCGGCTCCAGTGGCCGCGCTTCTGGGACTTCTGGGACCTTCTGACAGCC | 8  |
| wt-62640-62760 | 519 | CTGAAAAGGAGGCGCCCGGAGTAGGTAGTAGGCGTGGTGGCGGAGGACCAGCCGGGTAAGCGTGGCGCTCATGAGGGTGAAGATTTAAAAATCGCGCACCAGCAGCCGGTGG                   | 4  |
| wt-62760-62880 | 520 | GCCAAATCCCCAGTCCAAAGATCCCAAGCTCCAGAGGCATCAGCGCGCAGGGCGGCGAGCGGGTCTGCCAGACAGCAACTGACGCTCAGCGGGGAGCCCGGCTCCACC                       | 8  |
| wt-62880-63000 | 521 | TCTGCCAGGGGTGGCTGGCGTCTGCCCTCCGCTACCAGCGCTGCTGTCACTCCATAGCGGACGCCATGAAGGTCAGGGGTCCTGATCGCCCGGCTGCAACGCCGAATCGCG                    | 8  |
| wt-63000-63120 | 522 | GGGCTGCTCCCCCTCCGGCCCGGCTAAATATTTCCCGGGGTCGAAATTCACGCGGGAGCTGCTGGGCTGGTTGAGAAACGCGCAGGCGCTTCTCGTGTGCGGCGGCTC                       | 8  |
| wt-63120-63240 | 523 | TGGCGCAGGGCTGCTGGCCCGGGGAGGTGGCGGTGGCGGGTGGCAGTGGAGGGGAGTGGCTGCTGGTGGGGGGCAGTAGGATGCCAGCAGTCCAGGCGGCTTCTGGGACTTCTGGGACCTTCTGACAGCC | 8  |
| wt-63240-63360 | 524 | AGCTCCTTCAAACAAGCGGAGGCCACTGGAAGCCGCTTTTCCAATTAAGCAGAGTACCGCTTCTCGGGCTGACGCGGATTACTCCTCTCTCCCTGTTTATCCTAATGAATCAC                  | 4  |
| wt-63360-63480 | 525 | GGCCGGGTTAGCCGCCGGGTCGAGGCAAGTGGGGGCTGACGCGGATGCCAACCTGCTGTACGACAGCCCGCAACCTGGCTGACCTGGTCCCGGACTTTGGGCGGCTGGTGGCC                  | 8  |
| wt-63480-63600 | 526 | GACCGCCGCTCCACAACCTATCACCCCTGTGGGCCCCCTGGTGGAGAATAAAGAGCACCTATCTGAATAAATCACACGGTGGTCCACGGGCTGTGGTCAAGGCCATCCCT                     | 4  |

|                |     |                                                                                                                          |   |
|----------------|-----|--------------------------------------------------------------------------------------------------------------------------|---|
| wt-63600-63720 | 527 | CGCAGCACCGTCAAGTGACGGTGCCTCCAGGAGCCCTTTGTGGATCTGGACGCGTGGCTCTCCGGCGGGCGGGGGTGGCGGTGGAGATGCTTCGTGGGGGGCTGGCCCTGCAGCCG     | 8 |
| wt-63720-63840 | 528 | TGCCCCCGCGATGCGCGCCTCTATGTGCTCTGACCTATAGGAAAGCCGGCCCGGTTTACGTTTTTCCAGTCGTCCCGGGCCACTGTCAGATCATGAATATCTTAAGAATTTATTAC     | 4 |
| wt-63840-63960 | 529 | TCACCATCCATCATGCACCGCTATGCTGTGGTCCAGCCCTACATATAGAGGAGCTAACCTTCGGGGCGTTCGCTGTCTGGGGACATTTAGTCTACTGACGGTTGGAGGAGTCTGCC     | 4 |
| wt-63960-64080 | 530 | TTCAAATTACCGTGGCTCTAGCCTCCCGTGGTGGAGATTGACAGCTTTTATTCCAACGCTCTGACTGGGAGGTGATCTCTAGACTTAACGGGAGGAAACAGGAGGAGGGGGACAA      | 4 |
| wt-64080-64200 | 531 | GAGCACAANAAGTGGTTCAGTGGACACCCACCACAGCATGGCAACGACCCATGCTGCGAGCATGAGCTCTCTCCAAATGATTGATGAGTTAAAGGTCAAGGCCAATCCAGACCCCG     | 4 |
| wt-64200-64320 | 532 | AGGCTGATGCTCGCCGGGCGCTGCTCCACCGCTTAAGGCCGAGTCAGTTACACACAGATCGGCAATCTGGAGGTTCTCTGACAAATCTACGATGAGGAATCTCCAGA              | 4 |
| wt-64320-64440 | 533 | TGCACCGGGATGAGCTGGAGACCCGAGTCTGTCTTTCCGGCAGAGCCCGGCTACGAGCCGATCGTCTCCAGGCTACCTGTCGGCCCTGCGCTACTATGACACCTATCTGTATGTGG     | 4 |
| wt-64440-64560 | 534 | GGCGCAGCGGAAGCAGGAGAGTGTGCAGCACTTTACATGCGGTAGCCGGCTTCTGTGCTCAACCACCTGCCTCTACGCGGGTCTCAGGCGAGCCCTGCAGCGGCCAGGCCGGAGA      | 8 |
| wt-64560-64680 | 535 | TTGAGAGTGACATGGAGGTGTTTATTACTACTTTGAGACCTAACCTCCAGACGGTGTGCTGCTCCAGCCCTTATGCGCTTTGCCGGGTGGAAAACCTCCACTCTGGCCAGCTGCA      | 4 |
| wt-64680-64800 | 536 | TCCTCACCACCCCGACCTCAGCTCCGAGTGGGACGTGACCCAGGCCCTATAGGCACCTGGGGCCTACCTCTTTCAGCGAGCCGGGTGGGTGTAGGGGTGACGGGGCTGGCCAGG       | 8 |
| wt-64800-64920 | 537 | ATGGAAACACATCAGCTCCTGATGAGGATGATCAACAGCCAGTGGAGTACCACAATATGGCTGCAAGAGCCGGTCAAGTGTGGCGGCTACATGGAGCCCTGGCACGCCAGATTT       | 4 |
| wt-64920-65040 | 538 | TCAAATTTTGGAAACGAAGCTCCGGAGAACACGAGAGGCGCCCGGCTTTTACGAGGCTCTTTGTCGCCGAGCTCTTCTTCAAGCTTTTAGGGACACGCCCTGGCTCGGACTGTT       | 4 |
| wt-65040-65160 | 539 | ACCTGTTTGACCCCAAGGACCCGGGACCTGGAGAGGCTCTACGGGGAGGAGTTTGGCGGAGTACTATCGGCTGGTGCAGCGGGCAAGTTTGTGGCGGGTCTCCATCAAGTCCC        | 4 |
| wt-65160-65280 | 540 | TGATGTTCTCTATCGTCAACTGGCCGTCAGGGCCGGCAGCCCTTTCATCCTTTGAAGGAGGCTGCAACGCCCACTTTGGCGGACCTGCAGGGCGAGGCCATGAACGCCGCAACC       | 4 |
| wt-65280-65400 | 541 | TGTGCGCCGAGTGTGTCAGCCCTCGAGGAAGTCTGTGGCCACTGCAATCTGGCCAACTCTGCCTCCCGGCTGCTGGTGAATGCGCTCTGGCGGTGCGGGCACAGCGGGCCGACA       | 8 |
| wt-65400-65520 | 542 | CGCAGGGGATGAACCTCTGCTGGCCCTCCCTCAGCTCTCAGTCAACCCTACCTGGAGAGGGGGCAGTCCGTGATGATTCTCGTAGCCCGCTCAGAGATGCCACCCAGTGTCCACCT     | 4 |
| wt-65520-65640 | 543 | TTGTGGTGGCCTGCTCCATTCTTCCAGGATCCCGCACTTATGATTCAGGGATATGGCTCCATGGCCCTCGGGGTGCAGGGCTGGCCGATGCTTTTCGGACCTGGGCTGGCAGTACA     | 4 |
| wt-65640-65760 | 544 | CTGACCCCTCCCTCTGCTCGTTAAACAAGGAAATATTGAAACATATGTACTTTACGGCCCTCTGCACCAGTAGTCTGATTGGACTTACACCAGGAAGATTTTCCGGGTTTCAAACAGA   | 4 |
| wt-65760-65880 | 545 | GCAAGTATGCCGGGGTGGTTTCACTGGCAGGATTGGCGAGAACAGACCTTCTATTTCCAGGAAATTTGGTCTCGCTCTGCAACGCAATTTGAGGGATGGGCTTTCAATTCAC         | 4 |
| wt-65880-66000 | 546 | AGTTTATCGCCCTGATGCCACCTCAGGCTGTGCCAGGTGACGGGCTGTCGGAGCCCTTACCCCTTCTATGCCAATGCGTCCACCAAGGTACCACAAAGGAGGAGGCCCTTAGGC       | 4 |
| wt-66000-66120 | 547 | CAAAACGGTCTTTTGGCGTCATGTGCTGTGGATGACAGGGAAGCTTTGAATCTTGTCCGGGGCCGTGCTCCTGCTCCCGGAGGCTCTGCGGCAGCGCTACCTGCGTTTCAAACGG      | 4 |
| wt-66120-66240 | 548 | CCTTTGATTACAACCAGGAGGACCTGATCAGATGTCCGGCAGAGCCCGCTTTGTGGCAGAGCAATCTCCAGCCTGTTTTGGTGAGGAAGATGCCGCGGGCCAGCAGCG             | 4 |
| wt-66240-66360 | 549 | TAGCCAACCTACTGGTGCAGCTACGAGCTGGCCCTGAAGACTATCATGTACTATTGTCGATTGAGAAAGCCCGCATGCGGGGTGATGGAGTGAAGGCCAGCGGGCTCTGTCCG        | 4 |
| wt-66360-66480 | 550 | TGCCCGGGAGGAACAAGATGAGCGGAGTCCCGCTGAGCAGATGCCGCTCGCCATGGAACCGGCGAGTTGCGGGGCGGTTGACATCATGAGCAAGGCCAGGGGAGGGACCAG          | 8 |
| wt-66480-66600 | 551 | GTGGGTGGTGTGCCCGGGGATTGGAAGTGTGCTATAAGTACCCTCAGCTCTTCTCAGAGGATGATCTGTTGGAGACTGACGGTTTTACTGAAAGGAGCCGTGAAATCTTGCACATAAA   | 4 |
| wt-66600-66720 | 552 | CGTTTATGGCATGTCCAAGTTGTTGACGTGCGTGTGATGACAGGGAAGCTTTGAATCTTGTCCGGGGCCGTGCTCCTGCTCCCGGAGGCTCTGCGGCAGCGCTACCTGCGTTTCAAACGG | 4 |
| wt-66720-66840 | 553 | GGTGTCTAAGCTACTCAATGAGAGGACTTGGAGTTTACAAGTTCCTTTACGTTCTGGCCATGGCCGAGAAGCTTTGAACTTTAACAATTGATGAAGTGGTCAACAGCTCGAGA        | 4 |
| wt-66840-66960 | 554 | GCCACGACATTGATCACTACTACCCAGCAGAGCCATGGAGAACGTCACCGGGGACATTTAGCTAAACATTTTAAACATGCTCTTTGATGGGACAGGGCCGCGATGAACGCCATCG      | 4 |
| wt-66960-67080 | 555 | CAGAGGCCATCATGGCCGACGAGCCCTGCAAGCCAAGATTTCTGGCTCCGTGACAAGGTGGCGGCCCGCTCACCTGCCGAGAAGATTTGTGTTCTGCTGATTGAAGGCATCT         | 4 |
| wt-67080-67200 | 556 | TCTTCATTAGCTCCTTACAGCATAGCCCTGCTGCGGGTCCGGGGCCATATGCTGGCATCTGCCTGGCCAAATACATAAAGTGGGATGAGCTGCTCCACACCCGCGCTGCCTCCC       | 4 |
| wt-67200-67320 | 557 | TGTTATAAATAGCATGACAGCCAAGGCTGACCGACCAAGGGCCACCTGGATCCAGGAGCTGTTTCGCACTGCGGTGGAGGTAGAGACTGCCTTATCGAGGCTCGTGGAGGGGGTTA     | 4 |
| wt-67320-67440 | 558 | CCTTGGTGGATGTGCGAGCCATAAAGCAGTTTCTGGAGGCCACGGCCGATCGCATCTGGGTGACATTTGGTCAAGCTCCTTGTATGGCACACCACCCCAAGGACTGCCGCTCACCT     | 4 |
| wt-67440-67560 | 559 | ACATGACTAGCATCAAGCAAATAAATTTCTTTGAGCAAGAGAGTCCGATTACACCATGCTGGTGGTAGATGACCTTTGAGTCAAGGTTGGCTACTTGTCTCAGGTTTTGGGCATAAATTC | 4 |
| wt-67560-67680 | 560 | TCCTGCCTGCCTCTGCTCTGGTACGTTGGCTTCTGCTGCTGTTGATCATGGAACCCTCAGACTCTCCGCTTTAAGACCAAGGCCCTAGCCGCTCTGCAAGTGTATGACCATG         | 4 |
| wt-67680-67800 | 561 | CCCAGACTCATCTCAAGGGAGGAGTGTGCAGGTAACCTTCTGTCTGTAACCTATGGAGGCCCGGGCTGGCCGCGGTGGCCAACGCAGGCAGGCCGGGCTAATCAGCTTCAGAGTCT     | 4 |
| wt-67800-67920 | 562 | CCCCTGACGCTGTGCCGAGTGGCAGAATCACCAGAGCCAGAGGAGCCCGGGCCGCGTGCATTTAGAAACCTTGCCTACGGGGCCACCTGTGCTCGGGCAAGGAGCTGTTTGGCT       | 4 |
| wt-67920-68040 | 563 | CGGCTGTGGAGCAGGCTTCCCTGCAATTTTACAAGCGGCCACAAGGGGTTCCCGGCTGAATTTGTTAAGTCACTATGGAATATGATGATAAGGTGTCCAAGAGCCACCACACCTGCG    | 4 |
| wt-68040-68160 | 564 | CCCTGATGCCCTATATGCCCCCGGCCAGCAGGCTGAGGAACGAGCAGATGATTGGCAGGTGCTGTTGATGCCAAGACGGCTTCTCGTTGCAGAAGTGGGCACGCCAGCAAGGCT       | 4 |
| wt-68160-68280 | 565 | CAGGCGCGTTAAGGTGACACTCAATCCGGATCTCAGTCCACCAGTATACTTCTGGGAGGCTGCTCACCCTAGACTACAAGCCTCTGAGTGTGGGCCATACGAGGCCCTCACTG        | 4 |
| wt-68280-68400 | 566 | GCCCTGTGGCAAAGGCTCAGGAGCTGGGGGCCGTTGAGGCCACGTTGTCTGCTGGTAGCAGCGGACTCGTGGCGGGCGGCTTAGCCTCTGCCGATTCGGCGGTTAGCTGGCCAA       | 8 |
| wt-68400-68520 | 567 | TCTTGAGGTTTTACAGGTCTGGCATCATAGCTGTGGTGGCCGGCTGCTGACGTCAGCGGGGACCTGCCGTTGGATCTTAGTGTATTTATTTAAACACGCTCCGAAGAGCGGGCCG      | 4 |
| wt-68520-68640 | 568 | CCAGTACGGCCTCTGAGCCAGAAGATAAAGTCCCGGGTGAACCACTGGGCACAGGACTCCAACAACGCCCCAGACATACGGTCAAGTCCATCTCTTCACTCCGCCACCTCTTAGGA     | 4 |
| wt-68640-68760 | 569 | CCCCTACTTGGAGAGTCCGGCAAGGCCAGAGACACCCTGCCTGCCATTCCAGCCACTCCAGCAACGCCACTGGAGAGGCTCTGGCTGTTTCAGCTCGCGAGAAAGGACATCGT        | 4 |
| wt-68760-68880 | 570 | CGGAGGCCAGGCAAGAAGCAAGCACCACAAGAAAGTGAAGCAGGCTTTAACCCCTCATTTAACACCATGTTCTCGTGAAGCAGCACCTGTCCCTGGGGCCGTTGTCTTCTGTCTC      | 4 |
| wt-68880-69000 | 571 | GGCTCCTGGCCAGCACCCCTTCAATTTGGTCTTTGTCTTTGCCAACCTGCTCTCTGAGATCTTCTACCGTGGCAGACACAGTGTACAGGCTGGATTCCGACGGCATGCTA           | 4 |
| wt-69000-69120 | 572 | ATGGCCGCTCTGAGACGCTGTACCCGCCAAGCAGCGGCTGAGGGCCGCTCACTCCAGCCATCATGCTGAATATGCCAGCGCTTGTCTTCTTCCCTCAGAGTCTACTCGACCAAG       | 4 |
| wt-69120-69240 | 573 | ACGTGGGTTTCTGCCCCCTGCTCTTTCTGGCCAACTGCCTCTTATGCTCTGTTGGCCGCTGGCCACTCGAGATGTTTACATCTGCCCGGCTATACACCAAGGTTCTTTGAAGT        | 4 |
| wt-69240-69360 | 574 | GGGTGCTCTGGCTGCACCATCTTTGCCCTGCTGGTCTCCAGGCCCTGGAGGTGCTGCTGCTTATGCTCCATTTTCCATTTTGGCTGTTGGCTGTGGCCCTGGCC                 | 4 |
| wt-69360-69480 | 575 | GGTGTCTGCGCTAACAGATTACACTCCGGTCTCAGCGGAGCCAGCAGATTCTTCCGCGGGGAGATCATTGCTGGCATCTTCAAGTGGAGGACCCCTCCATAAATGCCCGTGGAT       | 4 |
| wt-69480-69600 | 576 | CTGCTGGCCATCTCTGCCTTACCCTTCTTGTCTGTGTGATGATTGTTGCATGTGCACGCAGAGGTGTTCTTTGGACTCTTAGATACTGCCCTCTTCTGTGGGGGATG              | 4 |
| wt-69600-69720 | 577 | GCCTCCGGGGGCTGACCTGGGCCATTCAGCATCATTGCATGTGCATGCCACCCTCTGCACCCTGACATCTGTTGGTATAATTTCTCCATGAAACCCTGGACCCCTGGGCAAG         | 4 |

|                |     |                                                                                                                              |   |
|----------------|-----|------------------------------------------------------------------------------------------------------------------------------|---|
| wt-69720-69840 | 578 | ACCGTGCTGTTTATCTCAATCTTTGTCTATTACTTTAGCGGGTAGCGGCCCTGAGCGCAGCTATGCGCTACAAGCTTAAAGATTGTGAACGGACCCTGGTCCATCCTCGTGTGGTA         | 4 |
| wt-69840-69960 | 579 | TACATGTGCTGTTTTGTCTTTACTTTTTGTGAATATCTGTTGGTGACATTCATTAATCCTAACGACCGGAGTCCCTGTCTTTGTGTTCTGGGGACTTGAGTTAGCTGCTTTCCCTC         | 4 |
| wt-69960-70080 | 580 | TTATTACATTGGGCTAACGGGAGGAAATGAACCCAGGGGTGGCAGTGGATGGGGTCAATTTATGGGCAAACTCACAGGACATGTTGGGGAGTTAGCATTGGCGTCGGGAAACACAGCTC      | 4 |
| wt-70080-70200 | 581 | TGGCAGTTATAACCGCACCACTAACAGGACATGTTGGGGGAGTTGGCATTGGCGTCAGGAGACACGGCTCTGTCAGTTATCACCGTACCATGAGTCCATGTGTGCCAGTGCCTAAT         | 4 |
| wt-70200-70320 | 582 | CACCGTTCCTCATTTTGTGTGCCTCCTCAAAATGTTCCAGAAGTCGGCCACAGGGGAGGTGGCTGAATTAGGGCCCTTTCCCTCATTCCCCCATGAGACCCACGTGGCAGCCCTAGGGCT     | 4 |
| wt-70320-70440 | 583 | ACATTGCGCTCCCACGTTTCCCTTCGCTGAGGCATCCGATGACTGAATTTTCGAGCTCTTTCCCTCTCCCTGTTATTCCCATAGAATTACAGTGAAGTTACACAGTGGAGGA             | 4 |
| wt-70440-70560 | 584 | TTCAAGTTAAACATTTAATGATTAACTCAGGAAACAAACAGATGACTGACCCAGTCCCGGAGAGAAATGGCCCTGACAAGTCGGCTGCATGATGCATTTCCGGCAGCTAGCTGTG          | 4 |
| wt-70560-70680 | 585 | TGAGTCTCCACGGCCTCTGTCAAAGGGAGCTTAGCGTGCCAGGGTGTAAATCTTGATGTAGTGGCCAGGAATCAACTTCATCGTGTCTCCGCTGCAGTTGGCGTTAATGTAGGCT          | 4 |
| wt-70680-70800 | 586 | GGGGCTACTGCCGCATATGCTGCCAAGAGACAGAGGGGCTGCTTCACATATGAGCTGCTCAGGGTCTCCACCACCTGTTTTGACGGGGCGTGGCAGAGGTGATGAGAAGATTGCTTC        | 4 |
| wt-70800-70920 | 587 | ACAAAGTTGTAGTCTCGCGTGTAGGAAGGAAGCAGGGTCCAGCTCTTTGAGCTTGGTCAGGATCACCTTGCTAAGACTCATGGCCAGGCCAGGAGGATGTTCCCGGGAGCTAGG           | 4 |
| wt-70920-71040 | 588 | GGCAGTCCCGTGGTAGGTGATCTCTGGAGCCAAAGATGGTCTTCTAGCATGCCACCAGGTGCAGAGCCCGCGTTCGATCGCTGCATCGTGCATCCAGCCATGTGTCC                  | 4 |
| wt-71040-71160 | 589 | GATGCCGAGGTAGGGGTATGACCACGCTGGAGGGCCGTGCAGGATGCGCTGGGCCGAGTTGGATCTCATCTCCCTCCTCTGAGGATGAAATCTCCATCTGTGGAGTGTCTTCG            | 4 |
| wt-71160-71280 | 590 | TGTAGGAACGGGCTTGGATGGGCTTAGGGTCAGAGAGGCCAGGGGCTGGCAAGGTGACAATGTAATCTTGAGACAGGCTTAACCCAGACTCATGTCAAACCCAGGTTTGTTCGGC          | 4 |
| wt-71280-71400 | 591 | AGGGGCTCTGGCTGGTCTTGCCTCGCTGCTTCTTGTGCTCTGCCGGCCCTCGAGATTCGACCGGGACCTCTGGTGTCTGTGCTTCGGGGAGCTTGGAGACCTCGGT                   | 4 |
| wt-71400-71520 | 592 | GCTCTAGGCACCTGGGGCCCTTGGGGCTCTGGGCCTTGTCTCCCGGGGCAAGTGTCCGGCTTCCATAACTTTCATCGGTGCAGCCATGGACCTCTCCGCTGCCTTTTGTGG              | 8 |
| wt-71520-71640 | 593 | CCTCTGGTGAAGAGGAGTTGCCAGTCTCCTCCTCTCGTCTCTCCCTGCACAGGGGTGAGCGATGCAATGTGACTGTCTTGTCTGTAGTCCCCTTCTTGGGAATCACAAAC               | 4 |
| wt-71640-71760 | 594 | GATGCCGAGGTAGGGGTATGACCACGCTGGAGGGCCGTGCAGGATGCGCTGGGCCGAGTTGGATCTCATCTCCCTCCTCTGAGGATGAAATCTCCATCTGTGGAGTGTCTTCG            | 4 |
| wt-71760-71880 | 595 | CTGCCCTCCATAGGGTCCAGATCGCAGTCTGTGTTGGTGTCTGAGACCCTTCAGTTCAGAAATGTGGCTCTGCAGAGGGGAGACAAAAGGTGGAGACTGCCTTGAACCTCTGTCT          | 4 |
| wt-71880-72000 | 596 | TCAGGCACCGGATGCCCGGCTCCACGGCCCGGCCACTGGCCGGTGTAGCTTCTTACCTGCGGGATCCTGTTGGAGGAAATGCTGCTAGTTCGGGAGAGTCTCTGAGAAGGAACCAT         | 4 |
| wt-72000-72120 | 597 | CTTGTCTGTCTCTACGACGGCTAGCTGGGATGTAGTGTCTTCTGACTGGCCTCAGCCCTATTTATGATTCTGGAGCCGGCCACGCTGATGGAGAAATGGGCGTCCGTTGATTGGCC         | 4 |
| wt-72120-72240 | 598 | CACAGCGACCGGCAAGCAGTACTGACTCATGAAGTGCAGCTGTAGGGCTGTGATGTGTAGTAGAGTACCAGAAACACCTCACATCTTGGAGCTGGCCCTGTGGGTATGCCTCAGGCACG      | 4 |
| wt-72240-72360 | 599 | CAAAAGTTCTGCCCGGGCATGGCAGACGTAAGTTTGGCCCGGTTTGTCTCAAACGTGACATGGAGAACTGGGGAAATTTGCTTCTGGCAGAACTGTTGCCAGGCTGCTCATGA            | 4 |
| wt-72360-72480 | 600 | GCGAGGGCCAGATGCAGGAGCTGACCCAGCGCAGAGATCCAGGCCAGATGTCCCTATCATGCGCAGACATTTCCACGTTGGGGGCAAGGTCTCGCGGGTCTCTGGATTAGAT             | 4 |
| wt-72480-72600 | 601 | AGTCACGCCCATCATCCCGATGTGGTAGCAGAAGTTTTGGGGCCGGCCAGCCACGTGCAGTGAAGTGTGATGTAAGAGTTTTGAATGTTGAGGGCATTCTAACATAGCTGTGCTTGT        | 4 |
| wt-72600-72720 | 602 | CTTCTCTCCGGATGACAGACAAAGAGGCGCAGCTGCCGGCTAAGACCACCGCCCTGTCCACCTTGTAGGATGTCGGCAGCCGGATGACCCGCCGGCGTATACACGCCGCTGTCAA          | 4 |
| wt-72720-72840 | 603 | AAAGCGGGGCCCAATCTCTTGTACTTGTGACGCATGCGGCGCAGGCAGGCCGTTAGGCCATGAGCTTCTGCAGCACAGACAAAACCTTGTACTGCGCTTGTCCACAATAGCAT            | 4 |
| wt-72840-72960 | 604 | GGCCTCTAGTAGGGGGTGTAGCAGCAAGCCAGTTTTCCGCTGCATATGCAAAAGGGGAGCACATCTCCATATTTCCGGGTGGCGGGTGGACAGCTGATTTGAAAAATAGA               | 4 |
| wt-73080-73200 | 606 | CCAGGTTCAAGACCAGGTTGACAGACCGGAAGCCGGGATTAAGATTTCTCCATGCTGTTAACTGAGAGTATCGCTTAAAGGTTCCCTGTTGAAGCACTGTGCTGGGCCAAATAGACGTAGCCCA | 4 |
| wt-73200-73320 | 607 | TGGTGAACACGCTGTCTGGGAGCGCAGTTGGTGGGGTGGAGACGACCTCCGCCAGGTGGGATGAGAAGGGTGCAGCGGCTGTCATTACAAAGTGTGCTGTCTGCAAAATGGCAGA          | 4 |
| wt-73320-73440 | 608 | GGAAAGCCGATAGCCGCTGCACCTTCGAAGGACGGTGGTGGGAGAAATGTTCTTGGGATTCCACTGGCCCGGCGAGTGGCTGGCCGGCCAAAGCATAGAAACCTTGAAGCGTGG           | 4 |
| wt-73440-73560 | 609 | GGGGTATGTGGACCTCATCCGCTGCCAGCGCGGAGCTCCACCAGTCCCGGGCCACGTCACACTGAGCCCGGCCAGGCCCGCATGAGTCCGTCATCGGGTTCGGGGTCCACG              | 8 |
| wt-73560-73680 | 610 | TGTATGGGGCCGGGGCTCCATGCGGATTTTCAGCTGCTGGACACGCACATGCTCAGCCAGTAAAGTCTCCCGGTTAAGTGTGCGCATGTGCTCCGAAAGCCCTGTCCAGGAGCC           | 4 |
| wt-73680-73800 | 611 | AGGGGAGCACGACGCCCCGAAAGGCAGACACCAATTTCTCCATGCTGTTAACTGAGAGTATCGCTTAAAGGTTCCCTGTTGAAGCACTGTGCTGGGCCAAATAGACGTAGCCCA           | 4 |
| wt-73800-73920 | 612 | CGAGATCGGCCGAGGCGAGGGGAAGGCGCCCCCTGTAGGCTGTATCGTCTTCCACAGCGCGGATCTCTCGCAGTCCCGCCGAGTTTCTGCTGTGCAAAAGTGGGCAAAAGCCTCGG         | 8 |
| wt-74040-74160 | 614 | TCGTACAAGGAATGCCCAAAATAGTAAGCAGCCGTGACTAGCACGAACCTGGGCTCGTGGAGCCAAAGGTGCTAATGAACCACCTGGCCGAGATGTTAACGCGGTAGATCGGCGCA         | 4 |
| wt-74160-74280 | 615 | GACAGCCACGATCTTGGGACCGACCCACGCCACCGCGCCTCTGGCATCCCCCTGTGGCTGTTTCTTACGCGTCAAGTGTGAGCAGTTCCACGAGGGGCGTGAAGCAGCCAGGGCCCCG       | 8 |
| wt-74280-74400 | 616 | CGCGATCTAGGTAGGTGGATAGACGGTCCGGTGTAGCGGCTGAGCGCGTGGAGCCGCGAGGAAGGGGAAGCCCTCTCCGCGCAGGTGCAGCGTCAGAACAGGCCGAGCGGCTCTGTGAGG     | 8 |
| wt-74400-74520 | 617 | TCAGCCGCTTCTTGGCAGGTGAAGCTGCAGTTCCACGAGAGAACCCTCCACGCTGGTGGAGGGGCGAGCGTGTGGCACAACAAAACAGGCGGAAGCCCTGTCAGGCCGCGAGAGGA         | 4 |
| wt-74520-74640 | 618 | TGGCATCGAGGATGGCCTCCGCAATGTCAGTGTGTTGAGGCCACAAGGGCCTTGTGACGACGGGGCGGACATATTTAAGACCAGGAGGCCCAACGCGGGCTAAACAGAACGATGGC         | 4 |
| wt-74640-74760 | 619 | CTTCTATCTCCAGACTGGTGTGCTGCGGGCTCTGGCTCTTTGGCCGGCCAGGAATAGATACAGCCAGCTCCCTGAGGAGCCGGAGACTTTGAGTCCCGGACCGCTGGCGAGCCGA          | 4 |
| wt-74760-74880 | 620 | GATAGATCTGGCCCTGCCCTGTTGTGCGAGTGGAGATTTGCTAAGAAATGACGAGACGATGGGCTCACTGAGACAGGTTATTTGCTCGCTGTTCAAGCCAAATAGCATCAGGATCA         | 4 |
| wt-74880-75000 | 621 | CCTGAAGCGCTTTGACCGCTCCGCGTCCCTGAGAGCTGCTGGGTTGGTGGAGGCCAGGTGGCCAAAGCTTGGAGCCGTCGCTCAGTCACTGGAATACCATGATCTCTGTGGCTGT          | 4 |
| wt-75000-75120 | 622 | AAGCGCATCTGAGATGGACGAGAATGGGCTCAAGGCCCTGCTGGACAACAGGCTGGCGACAGCTGGCCCTGATGAGATGGAGAAGGTGGCCACGGCCCTCAAGATGGACGAGACCGG        | 4 |
| wt-75120-75240 | 623 | TGCCTGGGCGCAAGAGATCTCGGCCGTTGCTCATCGGTGACCGCCCCCTCAGCCTCGGCCCTTTTCATCAACTCCGCTTTGAGCCCGAGGTGCCACCCCGCTCTTGCACCGCCTCC         | 8 |
| wt-75240-75360 | 624 | CGTGGTCCGCGAGCCGAGCACTTGGGCCACGGAGCTCGCTTAACTGAGCAACAGACTCCACACCAATAAACATTTTATTGGTAAAACAAGGATATGAAGGTGTCATTGACCCG            | 4 |
| wt-75480-75600 | 626 | CAAGGACCCCGCGTCACTGTGGGGCTGTAGAAGGAGGTGAGGTGGTCTTGTGAAGGTAAACAAGCTGACAGAAAGCGCCGTTACTGTTAAGGAACACGGTCTGTCTACTAAAGTTGG        | 4 |
| wt-75720-75840 | 628 | CGGTGAGTGTCACTGAGACGGTCTGATGGGGGAAGGGCCAGGCTTTGGCAAAGAGACGTCAGGCCACGTCGCCGGGTTACTGGGGTGGGTTGATGGGACCTTGTCCCTCTCCA            | 4 |
| wt-75840-75960 | 629 | TCTGGGGTGGCATATCTGAAGCGACCGAGTGGATTTGAGCTCCGATGGACAGCTGGAGTGTAGCCCTGATTTGAGGATGAGGAGGTGGCCACGGCCCTCAAGATGGACGAGACCGG         | 4 |
| wt-75960-76080 | 630 | CGATGATGCCAACATGAGACGTGACCGGACGGGAGGTGCTGCCACAGCATGAGCCATGACCCCTGGGTGGCGGGCATAGAGCCATAGTCCAGTGTGGTCTTATCGGGCGCA              | 4 |
| wt-76080-76200 | 631 | GCAGGATGGTGGTCTTGTGACCAAGGTGAGCCGCCCTACACTAGCCTGCTGGAGCAACAGCTTGTCTTCTGGAAGGCGTAGCGTATGTGTGACAGGCCCTCCATGGTGTGATCTAAC        | 4 |
| wt-76200-76320 | 632 | AGACAGGGACGGCGCCGCTATATATAAGAGCCCAAGACCCGGCTCTTTACTGCGAAATGGGAAGGCTCTAAGAAAGCCGTTTGAAGGCTGTGCCACTGCTCTCTCGCCGCCAC            | 4 |

|                |     |                                                                                                                             |   |
|----------------|-----|-----------------------------------------------------------------------------------------------------------------------------|---|
| wt-76320-76440 | 633 | CTGGCTTCGACCGGGGTGCTGCCGGCCGGCGCTCCAGTCCCACAACCGGGGGGGCGCTTCCCTGACTGAAGCCACAGGACCAGTTCTACTCCTACACATGTAATGCGGACACATTCTC      | 4 |
| wt-76440-76560 | 634 | GCCCTCTTTGACCAAGCTTTGCCTCCATCTGGGCACTTCTGACGCTTGTCTTAGTCAATATAGCCTCAGCCATCTACCTGATGTACGTCTGCTTTAAACAAGTTTGTGAACACGCTGCTGAC  | 4 |
| wt-76560-76680 | 635 | GGATTAGATGGGATATTTAAAGGGGAGCAATCTCGGCTGTTTGTACTTCTCTCTGCTGTTAAACCAATAGCATGTCAGCTCCACGCAAAGTCAGATTGCCTTCTGTTAAGGCTGT         | 4 |
| wt-76680-76800 | 636 | TGACATGAGCATGGAAGACATGGCCGCCCGCTGGCTCGCTGGAGTCTGAGAATAAGGCTCTGAAGCAACAGGTCCTCAGAGGGGGTGCCTGTGCCTCGTCTACCTCTGTTCTCTGCTC      | 4 |
| wt-76800-76920 | 637 | TCCAGTGCCTCCGCTGAGCCGCTTACAGCTCGACAGCGAGAGGTAATGATTACGACAGCCACGGGGCGTGGTGGCTCTCAGGCTATGAAGAAGTTGAAGACAAGTTCCGAAATCTGT       | 4 |
| wt-76920-77040 | 638 | TGACGGTGAATACCCGCAATGAAATGGAAAATATTTGCAAAATCTGACCTCCGCACTCAAGTATCTATGTTGGTGCAAAAAGCCAAACCCAGCTGGTGAAGGACACGACCCG            | 4 |
| wt-77040-77160 | 639 | AGAATCAACAGCACCACCCAGCCGACCTGCCCGCTCCCGCTCCCGGGGAGCAAGCAAAAGTCAAAATTTCTGATTAATAAAATTTTTATTGATTTATACATAGGCTAGGCTCCGGCG       | 4 |
| wt-77160-77280 | 640 | TCATCATATGGTGGGGTGGTGTAGGTATGGGATGTAGACAAGTTACGCTAAAGGGCGAGTCCGCCATGACCAGCAGCAGCAGAAGGGTCAGCACAGCCAGAGAGGCCACTGCACTACT      | 4 |
| wt-77280-77400 | 641 | AGCATGGAGAGGTTGAGAATCTGGGCTGGGACGTTGGCGGGACTGGCACGGTGGCTTGGGCTGTGGTAACCGGTGGGCTCGTAAAGTCCAGCGGGGCCGAGTTGTGTAGAAGTGTCTG      | 4 |
| wt-77400-77520 | 642 | GGAGGTAGATAGTGGTCCGATTGTATCTCGGCTTGGCGTAGTTGAATACCCGCCAATCTGTGGTGGGCTGTACTTGTCCGGGCTCCATGTCCTGTGGTGTCTTCCACCGGTG            | 4 |
| wt-77520-77640 | 643 | GTAGAATTGCCCTTCCACCTGTTGAGGTGACCGTGGAAACCGCGCTTTTGGCCACTGGGGGCTGGGGCAGCTTGCATTTGGGGGGCGTGCCTTGGTGACATTAACCTCCCC             | 4 |
| wt-77640-77760 | 644 | GGTTTTGGATGTGAACTGTTCCAGGGCTGACGCTTGGCTGGTGGGCTGGCGGGGCTGGCGAACTGGTGGACACATGATGTGTCTGATAGAGGCTGGTGTCCCTGTGTT                | 4 |
| wt-77760-77880 | 645 | ATATTTTACCACCTGTTGGGTGAGCGGAGGTTAGTAAAGGCATATGTGACGTTGAATTGTACTGGTGGAGGGGCTGAGTGTCTGGGTTTGAAGTGGGCTCAGTGACATGGAAGAG         | 4 |
| wt-77880-78000 | 646 | GTTGAACCTGAAGTTATGTTATGTTGGCCTGTGGTAAACAGCACTGGTGCATTTTGGGTTGGCTGGTAACACTACTGGGGTGGGACTTGTCTCTAAGGTGTGGTGGTGGCATTGTCC       | 4 |
| wt-78000-78120 | 647 | TGTGGACTGTTTCTCCACAGTAGGGCCGGTGGCATTGGGGTGGGGTAGTCACTGCTGAGGTGGGGCTGTTTTTCCCAAGGTGGGGCTGGTGGCATTGGGGTGGGGTAGTCACT           | 4 |
| wt-78120-78240 | 648 | GCTGAGGTGGGGCTGTTTTTCCCAAGGTGGGGCTGGTGGCATTGGGGTGGGGTAGTCACTGCTGAGGTAGGACTGTTTTTCCCAAGGTGGGGCTGGTGGCATTGGGGTGGGGTA          | 4 |
| wt-78240-78360 | 650 | TTACTTTCTGTGCCGTTGTCCCATGGAGATGGACTTGGTGTACCCGGTGTGCGCTGACGTTGGCCGGCTGGTGTGGGCTGGTGTGCTGATAGAGGCTGGTGTCCCTGTGTT             | 4 |
| wt-78360-78480 | 651 | GCAGGTGCCGTGAGGTTGGTAGGCAGTGTAGTAGCTGGTAGACCTGTCTGTTGATTGGGATCAGCAAATCCAGTTGATTCAAGGTAGGGGAGGTTGGTGTCTCGGGTGCCTTG           | 4 |
| wt-78480-78600 | 652 | GAGAAATAACCTTGTGGGTTGTTGGTGGCATTGGTAGCCGTCGTGTGATAAATGAGTGTCTGGGGGCGTCCCAAGACCCGAGACAGTAATGTCAAATGTCCGATTGCTCGCAAT          | 4 |
| wt-78600-78720 | 653 | GCACCAGAAATATTTTCCAAACCCGAAAGGTGCCCGGAGTGTGAGAGTCCATTTGCATCTAAAGTCAAGTTTCAAGTGTGTTGGCCAGGCCCCAAAAGGCAGTCACTGTAAACATTTGGCGAG | 4 |
| wt-78720-78840 | 654 | TTTGGCTCCTCAGAAGTGACCATGGCACTGAATAGGTAGCATTGTCACCCACATATGTGATGTCTGGTGTGTTGTCGGCATGTCTGTGAAGTGGAAATCTCATCAGAGAACAATG         | 4 |
| wt-78840-78960 | 655 | TGGACTGAATGCAGTAATCTCCCGCTCCGCTCCGTTCCAGAGTAAACAGCACTGTTATTTGCCAAGAAATGTCAGACTGGAGTGGTGTGATGCAATTTGTTGCTCCGGG               | 4 |
| wt-79080-79200 | 656 | TATGCATACCCTGTACCAGTATTGGGGTGGCCACGGGACTCGTTGATGTGAGAATCCGCGGCTGGGAACATGGCTCTCGTATCCACTGCAGGTGATGTTAAATTTTGTCTCCGGG         | 4 |
| wt-79200-79320 | 657 | AGAACTGTGAAATTTCCGCATCTCCATAATACACTCAATATCTATCTCATTACCAGCATTTCTGTTTTACGCTGAAATTCGAGTCTTGTGAGTGTGCAAACTTAAGGGTAGC            | 4 |
| wt-79320-79440 | 658 | GTGACATCCAGCCCTGTGCCCTACTACTGCCGTTATATTTGGTAGAATACAGTTATCCCACTTATGTATGGCACTGTTTCTGGTATCAGGTACACGGGGTTTTGCATTTCTGCATGG       | 4 |
| wt-79440-79560 | 659 | TGGCACCACATGGTTCCAAACACATCTTGAAGTAGACATCTACAGATTCAGGCTTACTTGTGCTCCTCCGGTGGTGACGTTAATTGGAAGCTTCTTAGACCAGTATAGTAGGCC          | 4 |
| wt-79560-79680 | 660 | AATTCCTCGACCAAGGAGCTCCAGTAGAAGAGATTGGTGCCATTTCTGAGCCACAAATGCACCTCGAGTTGGTAGACAGCCTTCGATGGGGTGCAGCTGGCCAAAGTCAAGA            | 4 |
| wt-79680-79800 | 661 | TCAAGTTGATGCTTTTTGCCCGCCAGCATCGAAATGTAGTATGATGTTTACCATCACACAACAAGGTAAGTAAATTTGTTGCCGTTGGTTTTCAGCGCATCGACACAGCAAGCA          | 4 |
| wt-79800-79920 | 662 | TCTTACCCTGTGAGTGGATCAGGCTCTGGATGGTGTACTGACACACAAGCAAGGCTGCCTCATTGTCTCGCCACCGATTTCTAGGCAGCATCCTTTAATAGGTACAAGGGGGTGC         | 4 |
| wt-79920-80040 | 663 | GGTGTGGTGTGAGTCACTTTTGTGTGACAGAAAATGGACAAGGACAGCCGGGTTCCCGCCGCTGGATGACAACATGGAAGAAGTCCCATCTACCTCGTTGTGCAGGAACAGGT           | 4 |
| wt-80040-80160 | 664 | ATCGCGGGGAGATTGGGAAAATGTCTCATAGAGTTATCAGATAGCAGCTCAGAAAAGGAAGCAGAAGATGCCACCTGGAGCCGGCCAGAAAGGTACGAAGAGAAAGCGGGTGCATCA       | 4 |
| wt-80160-80280 | 665 | TGATGCCGGTGGTGTGAGTCCAGCAGCAGCCATGCTCCACCCAGCCGATCTCCTGGGCGAGAAGCCATTCGCGAGGTTTCCACTAGATCTAAGAACACTTCTTAAGCGATTGG           | 4 |
| wt-80280-80400 | 666 | AGCCCGGCTACGGTGTGAGCATCCATGGCCTAAGTGTGTGATGTTTACCATCACACAACAAGGTAAGTAAATTTGTTGCCGTTGGTTTTCAGCGCATCGACACAGCAAGCA             | 4 |
| wt-80400-80520 | 667 | TAGACCAGTTTTTCCGATCCAGATTTCAAATACCAGATGTACATAATGTATGCCATGGCCATTCGACAGGCCATTAGAGATCGTGGGAGAAATCCAGCTTCTCGTAGAGATCAGGCCA      | 4 |
| wt-80520-80640 | 668 | AATGGAGACTGCAAAACCTGGCCGGCGGATGGCCTATGGGTTACCAGGCATACAGCAGCTGGATGTACAGCTACACCGATCACAGCAGACTCCACATTCGTACATCTCCAGGGGACAC      | 4 |
| wt-80640-80760 | 669 | TTGGGTGCACAGGTGGCCGTAGGTGTACAGTACCTTTTCCGCCGGCACCTTAAAGCTGCCCGATGTACCCCGGGGATGCCAGTGGTGTATGTTAGAGCTCCGTGGGTAACATTG          | 4 |
| wt-80760-80880 | 670 | TACAGAGCTGTAATCCCGCTACAGTATTTCTTGTACTATAGGCTATACACAGGAGCCTCACGAAAATCTGGGAGGAAGTTTAAACCTGACCAGCGTGTTCATTTATGGAATTC           | 4 |
| wt-80880-81000 | 671 | TAGGATTTTTGCAGAGAACGGATTTGCTTATACAAGAGCTTGTGACGATGCCCTGGGCACCACTAGTATCCAAACACCGTGGATCGATGACAATCTTAGCACGGAGACGGCACAGG        | 4 |
| wt-81000-81120 | 672 | CTTGAATGCCGGCTTCTCCGGGGTGTGCGTATGGGATAGACTTGTCTAGAAGTGAAGGGAAACATGTGCAAGGTGCTACCGGTGAAACCGGAGAAGAAAGTGAAGACACGGAGAGCG       | 4 |
| wt-81120-81240 | 673 | ATGGAGATGATGAAGATCTTCTTGTATAGTGTCCAGAGTGGACCTAAGGTCAAACGACCCCTATATTTAAGAGCTGTGCACAGGTTGCTGCTGATGAGAGCGGGCAAACGACAG          | 4 |
| wt-81240-81360 | 674 | AACAGGGCAAGGAGTACTGAAAAGGGCCGTTGGGAGCACTTATGGCACACCTTAGGCCGCTGTTCCGAAACCAAGACCAGAGTCCACAAAGCGACGAGACAGCTACCAGTACGGGT        | 4 |
| wt-81360-81480 | 675 | CGGCGAAGTCCAGAACCCCAACCTTACCTAGCAGCTCAGGAAATGGCATCCCATATCATGAACAACAGGCATGGCCCGTGTCCGGTAGCACAGGGCCCACTACGCCCTTGC             | 4 |
| wt-81480-81600 | 677 | CTGCGGGGACGGCTTTGACCCGTTAGACCACAACACATGCCAGTAGAACCCGCTCTGTCCCGACAGTGGCATTGAGCGACAGTTTACCCCAAGCCAGTTGCTCCGGCACCTCCTA         | 4 |
| wt-81600-81720 | 678 | AGATTGCTATGACAGGGCCCGGGAAACTTCTGGCATTAGACGCGCGGGAGCGTTGGAGGCCGACCTTGGACGCCAAATCCACCCGTTCTCCAGTCAGATGTCCTGCGTGACC            | 4 |
| wt-81720-81840 | 679 | GTCTGGCTGTTTGGTGTGAGGCACAGGTCAAACAGGCTAGTGTGAGGTGACGCCCCCAGTTGACCCAAGTATCCCTCAGCAACCAATGGAGGGCCGTTGGTACCAGAGCAGC            | 4 |
| wt-81840-81960 | 680 | AGATGTTCCCTGTTGCCCTTTAGCCAGGTTGCTGATGTGGTCCGGGCACCTGGGGTACCAGGCGATGCAAGCCAGTACTTTGACCTCCCTTAAATCAACCCATTAGCCAGGGGGCAC       | 4 |
| wt-81960-82080 | 681 | CCGTGACCCCGTTGAGGGCTAGTATGGCCCGGTACTCCGGTACCAGGCAACACAGCAGCATGTTTGCATCCCTTAACTGAACCCATTAACCAAGGGGCATCCCGGCCATTTTC           | 4 |
| wt-82080-82200 | 682 | TCCCTGACCAACCGATGGAGGGCCGTTGGTACTGAGCAGTGGATTTCCAGCTTCCAGCTTCCCGCTGAGCCGCTGAGCCAGTGTAGGCCAGGGGTAGCCAGTCAACAATTTTACCTCCCTTAA | 4 |
| wt-82200-82320 | 683 | CTCAACCCATTAACCATGGGGCACCCGACCCATTTCTCCTCATCAGCCCAATGAGGGCCGTTGGTACCAGCAGTGGATTTCCAAGTGCCTCCCTAGCCAAAGGCAGTACG              | 4 |
| wt-82320-82440 | 684 | TGGTCCAACATCAGCTGGATGCTTTGGGTATACACTCCATGGTCTTAACCATCCCGGGGTTCCCGTGTCTCTGCCGTTAACCAATATCATCTCAGCCAGGCTGCCTTTGGGTTACCTA      | 4 |
| wt-82440-82560 | 685 | TTGATGAGGATGAGAGTGGCGAGGGTCCGATACCTCCGAGCCGTGGAAGCTTGTATTTGTAATCCATGGCAGGCCCTGCCCTCAGGCCCGGAGTGGCCTGTTCAAGAGGAGGGTG         | 4 |



|                |     |                                                                                                                          |    |
|----------------|-----|--------------------------------------------------------------------------------------------------------------------------|----|
| wt-82680-82800 | 686 | GCCAGGATGCCACCGAGGTTCTTGATTGTCAATCCATGGCAGGCCCGCCCTCGGACCCCGAGTGGCCTGTTCAGGGGAAGGTGGCCAAAATGTCACAGGCCCTGAAACTAGAAGGG     | 4  |
| wt-82800-82920 | 687 | TGGTGGTGTCACTGTTGTTCCATGTGTCAAGATGACGAGTTTTCCGGATCTACAAGATCCTCCAGATAGGCCCTAAGCAAAGGTGTAGAAGTGTGCCCTCCATTCCACCCACTGAT     | 4  |
| wt-82920-83040 | 688 | AATACGCCCGACAATAAAGTTGATGATATTGAATCCACACCTGCTTTGTTGTGATTTATTTTCATATCCATGAGAGAGACCTCGCATATTTGCAGAAGGGTCACTGAAACATCTTA     | 4  |
| wt-83040-83160 | 689 | TCTTAAAAACAGTTACACCTGAATAATGAAGAAAGCGTGCTCAGCAGGACACAGCAAGCCGATGCCGGGGGGGCATCTGGCTCCGAGGCCACCAGATTATGGAGATCAAGGTAATGTG   | 4  |
| wt-83160-83280 | 690 | ACACAGGTGGGATCTGAGCCTATTCACCTGAGATTGGCCCTTTGAACTCTCTCGGCCAGTGAGGATGATCCTCAATCTGGGCCAGTGGAAAGAGAATTAGATGCCGCTGCAAGAGAG    | 4  |
| wt-83280-83400 | 691 | GAAGAGGAACCTCATGAGCAGGACCAATGGTGGTGACGATCTTGGATGCTCATACCTCGCCAGTATTTGGTGTGAACCCACGCAGCTCCAGTGATCCAATGATGCCAC             | 4  |
| wt-83400-83520 | 692 | GCTGTCTATGATCCATGTTGGTGAAGAGGACCTAGAACATTTCCAGATGTTTCGTTGGATTTTTTGGCCAGCTTAATTGATTGTCAATGGTTTTCCAGCAATCGGACCTCCGGCCCTA   | 4  |
| wt-83520-83640 | 693 | GGCAGTTTATTCCTTGAGCAAAAACCTGAACATCGAAGAATTTATATGGATGTGCATGACCCTGCGTCACAGATGTCAGGCCATCAGAAAAAACCAATACCAATTTGTAAGCAGAGGCGT | 4  |
| wt-83640-83760 | 694 | TGGAAGCTCCTGTCATCTTGCAGATCCTGGCGTATGGGTTACCCGACGCATAAECTCAAAGTAAACAGTTTTGAGTCAGGGGGGGACAATGCCACCCGGTCTTGTGACTGCTACGCTA   | 4  |
| wt-83760-83880 | 695 | GGATGTGATGAGGGCAGCGGCATGCAACAACGTACAGTGTGGCATTGTACAGATACCACGAATATCAGACCAAAAACAAAAGATCGAAACAGCTTCTGATGGCACGTCGTGCTAGG     | 4  |
| wt-83880-84000 | 696 | TCACTTTCGGCAGAAAGATATACTTTGTTCTTTGATTTAGTATCTCCGAAAACACCTGTATGCTATATGGATTGGCTGGGCACGAAAAACCGAGTTTCATTTATTGAGTTTGTAGGA    | 4  |
| wt-84000-84120 | 697 | TGGTTATGCAAGAAGGACCAACACTATATACGCCGAATGTTCCGCGAGTGCACCCGGAGACCCAAAGCAGCCAAGCCATGTTAAGAGCGCATCGTGTCCGCAATTCCTTATGATGCCG   | 4  |
| wt-84120-84240 | 698 | TTAACAAACGAGGAGATTGATCTGCCATGCCCCGCGGCGAGCCATGAATATTGAGGCTCCTAGACTGCCAGATGATCCTATAAATGTTGAGGATGACGACGAAAGTGAGGAAATTTGAA  | 4  |
| wt-84240-84360 | 699 | GCTGAAAGCGCAGGAGGAGAAGACAAGAGTGAATGGAATCTCTTAAAAATATACCGCAAACTGCCGTACAATCCAACAGTATACGGCAGGCCCGCGGTGTTGACCGAAAAGTCAGAT    | 4  |
| wt-84360-84480 | 700 | GCAAAATCAACAAAAAATGACGGGCCATAGTAACTGACTTTAGTGAATCAAGGCCATTGAAGAGGAACACAGAAGAAGAGGACGCGAGAACAGAGCAGCCAAGGCCACGCTGAA       | 4  |
| wt-84480-84600 | 701 | TCCAGGCCCCACAGTGGTCTCCAGCGACCACCCACGACGCAAGAGCCTGGCCCGTGGCCCACTGAGTGTCCAGGCTCGGCTGGAGCCATGGCAACCTTTGCCTGGGCCCAAGTG       | 8  |
| wt-84600-84720 | 702 | ACAGCAGTTTACTTTCAGGAAGATCCATGCAGGGTGTCCAAGTACATGGTTCGATGCTAGACCTTCTTAAAAAAGACGATGAAGTCATGGAGCAGAGGGTTATGGCAACCTACTGCCA   | 4  |
| wt-84720-84840 | 703 | CCAGTACCACAACAGCCCGGGCTGGCAGAAGAGGCCCTTGTGTTCTTACCAGTGACCTAGGCATAGAGAGTGTAGGCCCGCTTCGACAGAGCCGGTTTATGATCAGCTACTGCCTGCC   | 4  |
| wt-84840-84960 | 704 | CCAGGACCTGACCCTCTTGAATCCAACACTAACGTCACCCACACGCTCAACTTAGCAGTTCGGCACCAGCTCGCACAACTCCATGGCCGGTGGTTCAGCCAAGTCAGACTCCA        | 4  |
| wt-84960-85080 | 705 | GATGACCAACGAAACAGTCCCGGCCACCGGAAACAGCTGCCCCACGCCAGTGCCCAATGCCCTGCGACCTATCCCTATGCGCCCTTGCAGGATGACGCAATCCCATTTAATCATCCA    | 4  |
| wt-85080-85200 | 706 | GTGGGACCCACTCCCCATCAGACCCCTCAAGTGGAAATAACCCATATAAGCCCACTTGGGCTCAGATAGGGCCACATTCATATCAGCTACACCAACGGGCTCCTGCTACCATGCTGTTG  | 4  |
| wt-85200-85320 | 707 | CGCCAGTGGGCACCCGCCACCTCAGACACCACCGAGAGGCCACCTCCCATGACCACTGAGGTGCCACCCGTTCCCGGGCAGAGCCCTCGGGGGGGCCCACTCCACGCCACCT         | 8  |
| wt-85320-85440 | 708 | CCTCAGTGGCCCGCTTCCCCGGCAGAGCCCTCGGGGGGGCCCACTCCACGCCACCTCCTCAGGTGCTGCCACTCCCATGCACTGGCACTAAGGGCTCCTGCTGTCAGCAGGGG        | 8  |
| wt-85440-85560 | 709 | CCGACAAAGCAAAATTTGCGCAATTTTAAACGGGGGGCGTCAAGAAAGGGAGACCATCACTTAAAGTTACAGGCCCGCTTGGAGCTCAAGCCGCTCGGGCTGGCAGCTTCCACAGGG    | 4  |
| wt-85560-85680 | 710 | TCCGGCACCAGTGACAAGATTGTGCAGGCGCTATTTTACCACCCGTTTTGACGCCATACAGGTTATGGGGCAAGGGGGTCCCAACGGCCATGGCCGCTCAGCGGTGACACAG         | 4  |
| wt-85680-85800 | 711 | GCACCCCGGAATATACCAGGGAAAGGAGGGGAGTGGGGCCTATGCCTCCACCGATATCCCGCTTAAACGAGCGAAGATCGAGGCCATACAGAGCCGAGATGCCGCACGGGGG         | 4  |
| wt-85800-85920 | 712 | GCTCCGCACTTCCCGTGTATCTTGGAGAATGTCCGCCAGGGCAACAGCAGACTCTGGAGTGGGAGAACTGCTAAACAGGAAAGGACATGTTGGGCTGGGGACATTTGAGATT         | 4  |
| wt-85920-86040 | 713 | TCTTCCCTTCTCTCGAAACATCGAACGATGAGTATTTCGGCCATGTAACAAAGAACTGGGATGAACCCCTGGGGCAACAGACTGCGGGGAGGAGGGGGCAAGTGATAAGTCATGACA    | 4  |
| wt-86040-86160 | 714 | ATTTTATGATGAGGTAGAAATTTTGCATATTTTCCAGCCACCATGGAATCATTGAAGGACAGGGGACTCTAGACAGTCAACCCGACAATGAGCGGGGAGATAATGTACAGACTACCGGC  | 4  |
| wt-86160-86280 | 715 | GAGCATGATCAGGACCTGGGGCGGGGCTCCATCCAGTGGGGCTTCTGAGAGATTGGTACCAGAAGAGTCATACTCAAGAGATCAGCAACCTTGGGGGCAAGCAGGGGTGATGAAAAC    | 4  |
| wt-86280-86400 | 716 | AGAGGCTGGATGACGCGCATCAGGCGAAGCGGAGAAAGACGGGCTGCCCTTTCGGCCATCTTTAGACACGGAAGACAATGTGCCGCCATGGTTCCTCCACACGACATCACACCATAT    | 4  |
| wt-86400-86520 | 717 | ACCGCAAGGAATATCAGGGATGCTGCCTGCCGGGCTGTCAAGGTGAGTATGCCTTAAGTGGTTCATGGGGCCATCTAAGGCCACGTTGACCCATGTTTCCATTAATTTAGCAAT       | 4  |
| wt-86520-86640 | 718 | CGCACTGCAAGCGCTATCAAACCTGATCTCAGATAGTGGTTAGACACACAACACATCTTGCTTCTGATGGCAGCCAGGCAGCTTTCAGGACATTCCAGTGACCTTGGTTG           | 4  |
| wt-86640-86760 | 719 | CGGAGGGCGGTGGGTTGGCGACATTGGCTTCTAACATCTCCAGCCAACTCTGGCCATGGGATATCGTACAGCAACTACGCACATTAACCTCCGTCCTAACAGGGTTGGGGCTG        | 4  |
| wt-86760-86880 | 720 | ACAGCATCATGTTAACTGCCACATTTGGATGCCAAAATGGGCACGAACTTAAACACCTTCTGTCACCCTGTGGACACCACCCATGCTGGACCAAGAGAGCAAGAAGATACGCTC       | 4  |
| wt-86880-87000 | 721 | GGGAAGCCGAGGTACGCTTCTTCTGTTAAATGGCAGAGCGGTACCGAAGAATCTATGATTTGATAGAAGTGTGGCTCTGCAACCATCTGGCAAACTGCTCCAGACCGAGG           | 4  |
| wt-87000-87120 | 722 | AGAACCTTTGATTTCTGTCGTTTCATGGTGTGATGCCAGTGCATAATCCAGCTGTGAATTAAGTGGTTTCAAGACAATCGGAACTTTAAGCCATATACCCTGGAATGCAC           | 4  |
| wt-87120-87240 | 723 | CACCTAATGAAAAATCCATATCACGCGCGGAGAGGCATAAAAGAACACGTAATCCAGAAGCAATTCGAAAGGCAACAATACAGGGTTTATCAATGTTAGCAACGGGAGGTGAACCCAGAG | 4  |
| wt-87240-87360 | 724 | GTGATGCTACTAGTGAACGAGCAGTATGAGGACACCGGTAGACAGGGTTCGGACGTGGAGCTAGAGTCTCGGACGATGAGTGCATATATCGATCCCAATATGGAGCCGGTTTCAGC     | 4  |
| wt-87360-87480 | 725 | AGAGGCCCGTCATGTTTGTGAGCCGTGTGCTGCAAAGAAACCGAGGAACTGCCCTTGGCCACGCCCCAAGCAGCACCAGTGAAGCGCACAAATGTTAAGACTCTGATAGATCTGATA    | 4  |
| wt-87480-87600 | 726 | AGGCAAGACACAAAGCACCCCTGAAAGGCCGGGCCCTTCCGAACAATCATAGTACCGTGGAGCCCGCCACCCGACCCGGTGGAGATGCCAATGGTATTCTCCATCAACCACTC        | 4  |
| wt-87600-87720 | 727 | CAGTGCCAAACCGGTTCCAGTCAAGCCTACGCCACCGCCTTCCCGTAGGAGAAGGGGAGCGTGTGTGTGACGACGATGATGTCATAGAGGTGATTGATGTTGAAACCACCGAAGATT    | 4  |
| wt-87720-87840 | 728 | CATCGTCAGTGTACAGCCAAATAGCCACATCGGAACATCAAGACGGCTTTCAACGTTACAGCCGACGTCAAAAACGAGCCGCGCTCCACCGCTGATGCTTCCGATACTGGCCCTC      | 4  |
| wt-87840-87960 | 729 | CTGCCGTGGGCTCCTGCCGCGGGCCCTCCTGCCGCGGGCCCTCCTGCCGCGGGCCCTCCTGCCGCGGGCCCTCCTGCCGCGGGCCCTCCTGCCGCGGGCCCTCGCATACTGGCGCCTC   | 12 |
| wt-87960-88080 | 730 | TTCCGCTGGGCTCCTGCCGCGGGCCCTCACATAGTACGCTCCTTCCGCCGGCTCGTATAATGGCGCTCCCGTCTGACGTATGTTTATGAGGAGCGACAGCTCCCCAGTCCA          | 4  |
| wt-88080-88200 | 731 | CGGGCCGTAACCTCAGTGTCTTGGGAAATGCGGGCTGGTGTGAAATACACAATGCAACAAGAACCAAGTTACACCTGCAAGTCCCGCACTCAGCCTACACGCTCAGCCATCAT        | 4  |
| wt-88200-88320 | 732 | GGGCCCATCAGTCTGCGCCCTCTCGGTGATGATGCTGGTAAGGCCACGCCATGAAAGTTTCACTATGAGTTCCATGTCGCCACACAGCCGATGCGCACGAAGAACAACCCCGGT       | 4  |
| wt-88320-88440 | 733 | ATGAGGATCCTGACGCTCCTGGAATTTAAGTTTACATCCAGATTTGCTGCTCAACAGCTCCCAAGGCTCCATACCAGGATACCAGGAGCCGAGCCGATCCCGCCAGGCTCCATACCAGG  | 4  |
| wt-88440-88560 | 734 | GATACCAGAGCCGCGCCCGCCAGGCTCCATACCAGGATACCAGGAGCCGCGGCCACCGGCTCAATCATCTTCATATCCAGGATATCGGGTCCCTGGACCCCAAGCTTCAAC          | 4  |
| wt-88560-88680 | 735 | ATCCATGTTATAGGCACCCCTGGGCACCATGGTCTCAAGATCCTGTGCATGGGCACACCCAGGGTCCATGGATCCAGGGCACCACATCTCCACCTCAGTGGGATGGATCTGCAGGAC    | 4  |
| wt-88680-88800 | 736 | ATGGCCAGGATCAGGTCTCCAGTTCACATCTGCAATCGGAGACAGGCCACCCACGCTTCAACTTTCATTGGTCCACTGGTCTCATCTCTGCACCATCATGGTCTATCCCCAGC        | 4  |

|                |     |                                                                                                                           |   |
|----------------|-----|---------------------------------------------------------------------------------------------------------------------------|---|
| wt-88800-88920 | 737 | CCCGAGCCCCATAGGCCCATCCAACAAGATTCCCCCTCCCCTATGCGGTACAAGATAGCATGGCCGTGGGGTGTGACTCATCAGGTACAGCATGCCAAGCATGCCCTTTGCCA         | 4 |
| wt-88920-89040 | 738 | GTGATTACAGTCAAGGTGCATTTACCCCACTGGACATTAATGCCACCACGCCAAAAAGGCTCGAGTAGAAGAAAGTTCTCACGGACCTGCCCGGTGTCCCAAGCTACTGCTGAAGCAC    | 4 |
| wt-89040-89160 | 739 | AGGAGATTCTCAGTGACAATTCTGAGATCTCCGTGTTCCCAAAGGACGCGAAGCAGACTGACTACGATGCATCCACTGAAAGTGAGCTAGATTAAGGGGATCCAAGGTGACCCCTGTAG   | 4 |
| wt-89160-89280 | 740 | CTATTTGATCTTTGACTGACACATAAACATGGTTTAAAGGAATGAACACTCATGTGTGAGACTGGAAGTACTAAATTTGCTGACATATGTACAATGAGAGCCAAAAATTTGATAAAC     | 4 |
| wt-89280-89400 | 741 | TTAAAAGTCCCCCATCTAATGATGTCCAGTTCCCTTCTCCACCCTGTACACCCCGACCCAAAGGGACTCAATGGCATTAGATTTCTAGTTACCACAGGTAGAATATCGGGCGTTGGC     | 4 |
| wt-89400-89520 | 742 | CCATAAAAAAAGTGCATGGATATGCTCGACAGGCTGGAAACACCCACTCCAGGTGTGCTTCTTTGGTGAATAAAAAACAGCATCTTTATGAAAATGTGTATCTGTGGT              | 4 |
| wt-89520-89640 | 743 | TTGCGATGTACAGTTAGCTTTGGTATGCTTTGGGGTACCTGAAATGTGTGACAGGTGGGTGTGCAATGTGGCAGTTTACCTCTTTGGTCCCACTACTGCTCGGCCCTCTGTTA         | 4 |
| wt-89640-89760 | 744 | AAGTTAACCGGCGTGGAGGATCCACCGGCCAGACCTCTACATTTGGTTGGGTACCCAGGTGATGGCCGCGCTGCCACCCGCCCTCCTCCTTACCTGGGTGGCAAAAAGTATGCC        | 4 |
| wt-89760-89880 | 745 | AGGAGTAGAACATAACAAGTGCATGGCGGTAAACAATGGCACCTCACCTGCTTAAATGAAACCATGGCAACCACTCAAAGAGAGCCGACAGGAAGATATTTAATAATCCATTA         | 4 |
| wt-89880-90000 | 746 | GTAACAGAGCGTGAAGCAGGCGTGTTCATAACCGGAGTTAGAAATTTAAGAGATCCTCGTGTAAAACATCTGGTGTCCGGGGGATAATGGAGTCAACATCCAGGCTTGGGCACATC      | 4 |
| wt-90000-90120 | 747 | TGCTTCAACAGGAGCGCAGCTGTCAATTTTCAGATGATTTGGCAGCAGCCACTCGGACAAAAATCAGGCTTTAGATGGGCAATTTATGTTGGACGCTAGCCGCTGGCATTGC          | 4 |
| wt-90120-90240 | 748 | TGTTAGTATATACTGACCTCAGGTAGTCTGCAGCAGTTGCTTAACTTGGCCCGGCTTTTCTGGAAGCCACCCGATTCTGTATCGCTTTATTTCTAGTTCAGAATCGCATTCTCTCC      | 4 |
| wt-90240-90360 | 749 | AGCTGCGAGCAAGGAATGCGTTACTACAAGTGGTGCCTAGTCAGTTGAAACAAGCCCAACATCCGCTGCCGCCCTCCATGAGCCCAACCCGCTGCCGCCCTCCTTGGCCCT           | 4 |
| wt-90360-90480 | 750 | CCTTACCATTCTGGCTGTTGGTTCCTGTGCGCTGTCGCCGGGACGCCACTGGTGCAGGCTGTGGAACCAATGTCTGCTAGCTGTTGCTTGGTTAGCCCGGGGCAAGCAAA            | 4 |
| wt-90480-90600 | 751 | CACCACTGCTGCTGCTGTTTGAACAGTAGAATTGTCTCCAGTTGAGGTGCTTCTCCCGGCTTGGTTAGTCTGTTGATTCTGGGTTATGTCCGAGACTGGGAACAGCTGAGGTGCTGC     | 4 |
| wt-90600-90720 | 752 | ATAAGCTTGATAAGCATTCTCAGGAGCAGGCTGAGGGGCAGAAAACACGACCCAGTCCGAGCGGTTGAACATGATAGGCAGTTAGCTGGCTTGGCAGAGGCTCTGGCAGCACC         | 4 |
| wt-90720-90840 | 753 | CCACAGCACACAAGGCAAGGAGCTTGCATGGCCCTCCAGGTCTGATAGACTCTGGTAGCTTGGTCAAAAAGCTGTACAAAAGGCACCTGGTATGGGTGAGTTGAAAATTTACATC       | 4 |
| wt-90840-90960 | 754 | TTCAGAAGTCGAGTTGGTCCATCATCTTCAGCAAAGATAGCAAAGGTGGCCGGCAAGGTGCAATGTTTGTAGTGTACCTGTCTAACATCTCCCTTTAAAGCCAAGGCACAGCCTC       | 4 |
| wt-90960-91080 | 755 | CTCTGTGATGTCATGGTTTGGGACGTGCTAAATTTAGGTGTGCTATGAGGTACATTAGCAATGCCTGTGGCTCATGCATAGTTTCTAAAAGAGGAGGAGGAGGATTTTTCAGAAGTGTCTA | 4 |
| wt-91080-91200 | 756 | AAATAAGCTGTGTCAAATAAGACAGCCAGTTGAAATATGCATGGCATGCAGCAGACATTCATCATTTAGAAATGTATCAAAGATTTTCATTAAGTTCCGGGGTCCAGGGGGAGTCCAG    | 4 |
| wt-91200-91320 | 757 | ATTCAAATCTCTGTCATGGACTCTAGTGTGTGGTCAAGTTCGTCCTCAATGGCCACGAGGGGGGGTGGCTCAGGTCATCTGCCATATGGCTGCTTCTCTCTTCTGGGGAATAAC        | 4 |
| wt-91320-91440 | 758 | AGTGTACGCATCTCCCTTAGGGCTTACGGCCCTGACGTGTTTCTTCTCATCAGGCTCCCAAGAGACTTGCCTCGGGGTTACTGCGGGGGCCGGTCAAGTGGTGGGGCACC            | 4 |
| wt-91440-91560 | 759 | GGCTGGCGTTAGGGATCCGACCGGTTTCATGGACAGTCTCTGTGGGGTGGGAGCCAAAGGCAGGCAGGGGGCGGTTGGCCACGGGGATCCGGGTGGATGGAAGGGCTGATCTCTT       | 8 |
| wt-91560-91680 | 760 | TGGCTGACACACTCTGCCCTCGAACAGTCAAGATGGCACTGCCGCTTCCGGCTTTGGCAGGAACATACCTTCCCGCTATCCCTGAGGCCCTTCTCTTTAACGGGAGGAAG            | 4 |
| wt-91680-91800 | 761 | AAAGTGGGCTTTGAGGGTGGGGAAATGGTCTCTCATCGCTCTTGGTGGACCCTGCTATCCAGGCTGTTCAGTTCCGCCCGTGGAAAGGACATGGAGTTTACCACGGTT              | 4 |
| wt-91800-91920 | 762 | GGGCTGGATGTCGGCGCGACTTTGGGGCCCGAGGCGCGGGGCTCGGCCCTGGCCTTCCCGCTCGCTGTGCTGGTGTCACTGTTGCCCGAGTCACTGCTGCTGGAAGTGTCTGTC        | 8 |
| wt-91920-92040 | 763 | ACCGCAGTCGGCGCTTTGGGCACCGGCTTACGGGCGATGGTCCGGCTCGGAGACTTTCAGTTTCAATGTAAGAAAGTAAAGTCCCGGACTCCGAGTCCGGGCTCGGTTGTGAGA        | 4 |
| wt-92040-92160 | 764 | GGCACCCCATCATTCCCATGAGCTCTCGTCCATCTGTCGGCTCCGACAGGATGAGGAGTTTCCACTGCTTGGACTTGGTTGACAGCAGGCACCGGGGAAGCACGCCCTCAC           | 4 |
| wt-92160-92280 | 765 | GTAGTCTCTGTCCGGCTGGCTGGAGTAGGAGGCCCGGGCAGTGTCTTAATCAGAGCCCTGACATCCTAACATCGTCCGTCAGATGGCTGTCTTGGACGAGACCATAGTCTGGAA        | 4 |
| wt-92280-92400 | 766 | CATCTCCTCGAGGACGGATAGGTGAACACCCACTTGCAAAAGGCTTGAACCTTGGAGCTTGGAGGCCCTCCTTCTCCATCCTGTTGAGGTGTCCACTACCTGCTGCCGGAGGCCAT      | 4 |
| wt-92400-92520 | 767 | GATGGCCGCGGTCACGCCCAGCACCTTGTGTAGGTGTAGGCCCGCACCCGACTGTGTTTTAGGAGCTTGTACATAGCGGTGCCTATGGTGGCAGGAATCATACCCGGTTGCTGGG       | 4 |
| wt-92520-92640 | 768 | GGCCTGGATGAAGAATCTGTAGTACCCTATCAGGTGGTCTAACACGTAGCGCATCACTATAGGGCAGCGATGGAACATGCTGCTTGGCGCACTTCTAGCCGCTCTTCTACCCT         | 4 |
| wt-92640-92760 | 769 | GTTGTTCCGGAGAATGGCCAAAAATTCAGATGTTGAGCGTGGCCATTAGCCCGCCCATCTCGCCCTGGCCCTTGGCCTATTATAAATGCCTTGCATATTTGTAGGATCTCAG          | 4 |
| wt-92760-92880 | 770 | AGTAATCTCCACTCCCGCTGTAATTCCTTGTGAGGACGTTGCAGTAGTCAGAGACCAGAGAGCCAGCTGCTTTTGTATTCAGGAGTTAGCCTCAGAAAGTCTTCCAAGCCATC         | 4 |
| wt-92880-93000 | 771 | CTTTTAGGCCATGCTAGTAGTAACAGAGGAAATGCCCGACCATAAAATCTTCTCCATGAGCTTACCTGAAACACTATCCCGAAGTGGGGATGTGGTGCATCTACTGAACAC           | 4 |
| wt-93000-93120 | 772 | CATCGGGTGCAGTGCACCTCCCACTAGCCACCCACTCCTGACAGCCAGAGGGGGCTGTTCTGGCAAGAGTCTTGCAGGCTGTACAGCAGCACAAGCTGCTGGAAGACACCATCGT       | 4 |
| wt-93120-93240 | 773 | CCCCAAGATCTTAAAGAAGCTGGCTTATTTCTTAGAGCTGTAAGTACTACTCCCCAAGGATGAACAGCGTGACATCGCCGAGGTTCTTGACCACCTAAGACGAATCGGGACCTGGG      | 4 |
| wt-93240-93360 | 774 | GCTGGACGACAGACTCGGGCCCTGATTAGGAAACTGCGCCAAGACAGACACCATGCCTCTGTAATGTCCCTCATGCCAGGAAGCAGACTACACAGCCGCTGCTGCTGCACTACGACCG    | 4 |
| wt-93360-93480 | 775 | CATCTCCATAGGTATGAGGAAGGTAATCGCGGATGTCTGCCGAGTGGCTATGCCTCCATGCCCTCCATGACGGCCACGCACAACCTCTCCACCAGCTTGTATGGCGTCCGGGCCAG      | 4 |
| wt-93480-93600 | 776 | TGAGGAACCGTGGCCTGGCGCGGTTCTTAAACAGGTCTCCTCTGGACTGTGGCCCTGCAAGTTTCGAGATGCATTTACTATAACTACATTAGGGATCTATAGCCACCATCTC          | 4 |
| wt-93600-93720 | 777 | CCAGCTCTGCACCTCGAGATCAAGGCCCTCTGCAGCTGGATAATATCCAGGATGGCATGCGCCTTTTCAACACAGCAGGCTCTCCTACCCCTCGGGAGAGCGTGGCCGCAAACTCA      | 4 |
| wt-93720-93840 | 778 | GGAGGTCACGGATGCCATTACCCTGCTGACTCGCTGAATACATAGACCTACTAAAGCACAAAAACATGTCTTAGAAAAGTGTCTGCCATGCAATACAAAATTTCTTACCCTG          | 4 |
| wt-93840-93960 | 779 | CGTCTGTTGTAGTGGAGTGTGTGCTGCTGATGGTATTCTACTTTAAAAAGGCCGCTGACATGCTGTTTATGAGCCATTGGCATGGGCGGCAATCGCAATATAAA                  | 4 |
| wt-93960-94080 | 780 | ACCCTGACCATCACATGGGGCATTAGCGACTCTGCATCAGCATCGTTAAGTATGAGTGGGACGACAGAGGCTCGGTTATTTGGTTCTGAACATCTGGCTGGGCGATTAACTAAGC       | 4 |
| wt-94080-94200 | 781 | TTATGAGCGATTTTACACAGGACAAGATGCTACTTTCTGGAGGAAATATTGCAGTCAAAAATCGCGATGCTATAAACAGACCCCGGGGGTGGTATGATGCTACTTTCTTCCC          | 4 |
| wt-94200-94320 | 782 | TGTTTGCTTTATGGAATGCCCTCCCAACATCTGGTAGACAATCCTCCAGGGAGATTAATCCAGCCCGCTGACAGGCTTAAACCACGGCCCAACAATTTATGCTGGGTGTTATCCAG      | 4 |
| wt-94320-94440 | 783 | GTGAGACCTCACACAAGGACACACCCGAGTCTGCTCCGGCTATCGTACGGGCTCTCCAAAAATTTGGTGGTATCGTGGGATGTCAGAGTGGCTACAATGTCTTAAAGGGATTGA        | 4 |
| wt-94440-94560 | 784 | AGGCAATTAAGCCCGCCTTTATGAAATCCCTAGGATAATACCACACACTAGCAGTGTAGTCTGTCAATCTGACATGTTGGTCCCAAGCTTGGCCAGCTTGGCTTACGTTGCTATGTC     | 4 |
| wt-94560-94680 | 785 | AGCTTGATACGACGCCGCTGCTGACGCTGACTTTACAGAAATCCCTAGACTCGATGACTCCGATGCTGTTTTGCGACGACCTTATTGGCAGCCTTATTACCTCAATGTTCT           | 4 |
| wt-94680-94800 | 786 | TTATTTCAAAGATTACATAACAAGACTCCATGAGCTTGAAGCAGGCCCTCAGTGGTATTGGATGTCTGCCACGGCAACCCCTGCCTGCAGCACCAGAACCCCTGCGAGACTACT        | 4 |
| wt-94800-94920 | 787 | TGGAAGCTTCCGAAATTCGGATAATCACTTTTATCTCCCGACGACAGGGCTTTAAACACCTTCCAATTTCCCGAAGAGCTTCTGGGGCGCGTGTGTTATTTGATTCCTTTGTGTG       | 4 |

|                  |     |                                                                                                                        |   |
|------------------|-----|------------------------------------------------------------------------------------------------------------------------|---|
| wt-94920-95040   | 788 | CGCCAGTACAGTTCAGGACGTTATCACCCATGGTGTGGGGCGGGTGTCTCTCGTCTCGGTTTCGGCCCTGCCTCCGGCCCCATCCCGGAGCCCCAGCAGACATGCTCTCAGTTAA    | 4 |
| wt-95280-95400   | 791 | CCTCACAGGCCGACCCAGCTTTTCTCCGTGGCCAGTAGCATCTCTGTCTGGTACCTTGAAGAGAAAGAGAGGGTCCCAGAAATCCCATCCCTACCGTCCAGCAAAAAGGGGG       | 4 |
| wt-95400-95520   | 792 | ACGAGGAATTTAGGCCTGGCTTGAGGCTCAGGACGCAATCTTGAGGATGTTAGCGGGAGTTCGGGGCTGCGAGTAATGGTGATGAGGACGAGGATGGTTCGGAGGATGGGAAT      | 4 |
| wt-95520-95640   | 793 | TTTCAGACCTGGATCTGTCTGACAGCCACATGAAGGGGATGAGGGTGGGGGGCTGTTGGAGGGGGCAGGAGTCTGCACTCCCTGTATTCACTGAGCGTCTGTAATAAAGATGCTAT   | 4 |
| wt-95640-95760   | 794 | TGATCTCTTTAGTGTGAATCATGTCTGACGAGGGGGCAGGTACAGGACCTGGAATGGCCTAGGAGAGAAGGGAGACACATCTGGACCAGAAGGCTCCGGCGGAGTGGACCTCAAAGA  | 4 |
| wt-95760-95880   | 795 | AGAGGGGTGATAACCATGGACGAGCGGGGAAGGACGAGGACGAGGAGGCGGAAGACCAGGACCCCGGGGGCTCAGGATCAGGGCCAAAGACATAGAGATGGTGTCCGGAGACC      | 4 |
| wt-95880-96000   | 796 | CAAAAAGTCCAAGTTGCATTGGCTGCAAAAGGGACCCAGCTGGAAACAGGAGCGGAGCAGGAGGAGGGGCGAGGACAGGAGGGGCGAGGAGGAGGGGCGAGGAGGA             | 4 |
| wt-96000-96120   | 797 | GGGGCAGGAGGGGCGAGGAGGGGCGAGGAGGGGCGAGGAGGAGGGGCGAGGAGGAGGGGCGAGGAGGGGCGAGGAGGGGCGAGGAGGGGCGAGGAGGGGCGAGGAGGGG          | 8 |
| wt-96120-96240   | 798 | GCAGGAGGGGCGAGGAGGAGGAGGGGCGAGGAGGGGCGAGGAGGGGCGAGGAGGAGGGGCGAGGAGGAGGGGCGAGGAGGGGCGAGGAGGAGGGGCGAGGAGGGGCGA           | 8 |
| wt-96240-96360   | 799 | GGAGGGGCGAGGAGGAGGAGGGGCGAGGAGGAGGGGCGAGGAGGGGCGAGGAGGGGCGAGGAGGGGCGAGGAGGAGGGGCGAGGAGGGGCGAGGAGGGGCGAGGAGGGG          | 8 |
| wt-96480-96600   | 800 | GGGGCAGGAGGGGCGAGGAGGAGGGGCGAGGAGGGGCGAGGAGGGGCGAGGAGGGGCGAGGAGGGGCGAGGAGGGGCGAGGAGGGGCGAGGAGGGGCGAGGAGGGGCGA          | 8 |
| wt-96600-96720   | 801 | GGAGGAGGGGCGAGGAGGAGGGGCGAGGAGGGGCGAGGAGGGGCGAGGAGGGGCGAGGAGGGGCGAGGAGGGGCGAGGAGGGGCGAGGAGGGGCGAGGAGGGGCGA             | 8 |
| wt-96720-96840   | 802 | CGGGGTAGAGGACGTGAAAGAGCCAGGGGGGAAGTCTGTAAGAGCCAGGGGGAGAGTCTGGACGTGGAGAAAAGAGGCCAGGAGTCCCAGTAGTCAGTCATCATATCCGGTCT      | 4 |
| wt-96840-96960   | 803 | CCACCGCGCAGGCCCTCCAGGTAGAAGGCCATTTCCACCCTGTAGGGGAAGCCGATTATTTGAATACCACCAAGAAGGTGGCCAGATGGTGAGCCTGACGTGCCCGGGGAGCG      | 4 |
| wt-96960-97080   | 804 | ATAGAGCAGGGCCCCGACATGACCAGGAGAAGGCCAAAGCACTGGACCCCGGGTCAAGGTGATGGAGGCAAGGCCAAAAAGGAGGGTGGTTGAAAGCATCTGGTCAAGGAGGT      | 4 |
| wt-97080-97200   | 805 | TCCAAACCCGAAATTTGAGAACATGACAGAAGGTTAAGAGCTCTCTGGCTAGGAGTACGTAAGAAGGACTACCAGCAAGGAACTGGTGCAGGGTGTGTTCTGATATGAGGAGTGT    | 4 |
| wt-97200-97320   | 806 | AAGACCTCCCTTTACAACCTAAGGCGAGGAACCTGCCCTTGCATTCCACAATGTCTGTTACACCAATTGAGTCTCTCCCTTTGGAATGCCCCCTGGACCCGGCCCAACCTGGCCCG   | 4 |
| wt-97320-97440   | 807 | CTAAGGGAGTCCATTGTCTGTTATTTTCATGGTCTTTTACAACCTCATATATTTGCTGAGGTTTGAAGGATGCGATTAAGGACCTTGTATGACAAAAGCCCGCTCTACCTGCAATATC | 4 |
| wt-97440-97560   | 808 | AGGGTACTGTGTGCAGCTTTGACGATGGAGTAGATTTGCCTCCCTGGTTCCACCTATGGTGAAGGGGCTCCCGGAGGGTGTGACGGAGATGACGGAGATGAAGGAGGTGATGGA     | 4 |
| wt-97560-97680   | 809 | GATGAGGGTGAAGGAGGGCAGGAGTGTAACTTGTAGGAGACGCCCTCAATCGTATTAAGAGCCGTGATTTCCCGCAGTAAAGAATAAATCCCAAGTACAGATCATCGGTGCTGT     | 4 |
| wt-97680-97800   | 810 | TGGTGTATTTCTGGCCATCTGTCTTGTACCAATTTTCTCTCCCAACATGGGGCAATGGGCCATACCCATGTTGTCACGTCAGTCCCGCTCAACACCTTCTCGGTTGGAAAA        | 4 |
| wt-97800-97920   | 811 | CATTAGCGACATTTAACTGGTAGCAATCGAGCTGCGAGGCTTTAAATCCACTAAGAGTGGAGCAACCAAGCTGGTCACTAGCCGCTGCGCAACAGGAGCTCAA                | 4 |
| wt-97920-98040   | 812 | CGTGTCTCCTTTTATCTCCATCTGAAGCGAAGCAGCTCCGCCCTCACGGGCCATCTCCGTGAGTGTAAACCACCTGGAGACTTTTACGGTTACTTCTAGTGAAGACCTGTT        | 4 |
| wt-98040-98160   | 813 | TGGTCCAACTTAAACAGATACGCATGGCATCGCGGGGCTAGACCTCTGGCTGGATGAGCAGTGTGGAAGAGAAACAGGAGATTGGTGTAAAGGAGAAAACTGCTTCTCCCGAC      | 4 |
| wt-98160-98280   | 814 | TTATGGCTAGATTTCTACAACCTACGCCCATCTCCAGCGCAAGCTTCTGCTGGTATTGCTGTGTCGACGCCCTGCGGACTCAGGCCACCGTCTACCAGAGGAGGACATGTGCATG    | 4 |
| wt-98280-98400   | 815 | GCCTGGGCCCGCTTTTGCAGCCCTCTGATATTAAGGTGGTATTTTGGGCCAGGACCCCTACACGGGGTCAAGCAAAAGCCCTGGCATTACAGCTCGCATACGGCTTTCCAGTTC     | 4 |
| wt-98400-98520   | 816 | CCCAGCTGAGGAACATCTACGGGAGCTGCACCGGAGCTCGCGGAGTTTTTCCCCAGACTCAGGCTGTCTAGCGGCTGGCCCTCCAGGGGCTTGCTACTCAACACCATCTG         | 4 |
| wt-98520-98640   | 817 | ACCGTGCAAAAGGGCAAGCCCGGCTCGACGACAGACTTGGCTGGGGTGGTTTACTGACACGTAATTTCAAGAGTCTCGCCATCTACCAACAGTCTTCAAGGCTGACACCCAGCCCT   | 4 |
| wt-98640-98760   | 818 | AAGGCGGAGACAAAGCTTCACTAATCAACTCCAAGAAGCATCTGGTCTGACCTCTCAGCATCCCTCTCCCTGGCCAGAACAGCACCAGAAAGAGTGCCAGCAGAAGTCTCTGGG     | 4 |
| wt-98760-98880   | 819 | AACAACCACTTTGCTCTCGCTAACAACCTTTTGCCTGAGAAAGGGCTCGGTGAGATAGATTGGAGGCTGTAGAGGGGTCATCACTATGGCCATGTTTCTGAAGTCGCTGGGGTCCGGT | 4 |
| wt-98880-99000   | 820 | TTGCAGGGACCGGCGCTTGTGCGACGAGGAGGAAGAGACTTACAGAGCAGCAGCTACACTCTGGGGTCTCAGGCCTCCAGTCTATCCAGGAGGAGGACGTGAGTGACACTGATGA    | 4 |
| wt-99000-99120   | 821 | GTCTGACTACTCAGATGAAGACGAGGAGATTGATTTGGAGGAAGATACCCAGTGACGAAGACCCATCTGAGGCGAGTGTAGCGACCCCTCGTGGCATCTTTCAGATTCAGACGAGTC  | 4 |
| wt-99120-99240   | 822 | TGACTACAGCGAGAGCGACGAGGATGAAGCAACCCCGGCTCTCAGGCTCAGCATCTTAAGAGTCTCGCCATCTACCAACAGTCTTCAAGGCTGACACCCAGCCCTCTCCCG        | 4 |
| wt-99240-99360   | 823 | ACCACGCACCCGGGCACCTCCGAGGCGCCGGCTCCCGCGCGGTGAGGGGACGGGCTCAGCACCTCCAGGCCACCCAGCCCAAGTTCAGCAATCCACCAAGACAAAGGTTCCCATAG   | 8 |
| wt-99360-99480   | 824 | ACCTACGGACCTGTACTTAGAGGCCAGCTCCAGCGCCGCCCTCCACCTTCAAGTCCCAATACATACAATAAACACATGATGGAACACCCCCCAATTAAGGGCAATAACAATA       | 4 |
| wt-99480-99600   | 825 | CAATTTGGCCATGGCTGTAATAAATGTCTATAACCTGGAGTCTGCATGTCTGTTTATTCAGTAAACAGTAGTGCCTGAGTCTTTTAGGGCATCCAGATGTAGCCGCTCGCGG       | 4 |
| wt-99600-99720   | 826 | GGTCCCTCCCAAGTATCTCGGATAGGGGATTCTGTCCATGACCAGCAATAGAGTCCCGGGCCGGGACAGCCACATACATGACCCGGTGTGATGTTCTGTGGCTGC              | 4 |
| wt-99720-99840   | 827 | CGAAGCAGATGGCGACTTTGTTTAGGGACAGACCTGGGCTTGGCTATGGCTATGGCCAGCTTTGAGCTAATGCCATAGTCAAGGATGCTGAGAGGTTCAAGGACTTGTCTCTATCG   | 4 |
| wt-99840-99960   | 828 | TCTCATAAGTTTGTAGTATTGTGTTCCAGGCGACACGAAAGCTGCCTCATCTTACCATTAGCCTGGGCATGCGTGAAGTCCAGCGTCTGAGGCTGCTGCTTCTCCGGATGC        | 4 |
| wt-99960-100080  | 829 | CAAAGAAGACGTTGAGATGCGTGTAGCCAGAAAGCGTGTAGTCTCGTGGTGGAGGCGTAGTCCAGGAGGCCGTGAAGGAGAGGCTGCTGAGGTGAATCTATGTTGTCGGGAATCA    | 4 |
| wt-100080-100200 | 830 | GCATGTTGTTGGTAAATGTGACAGAGGGGAGGTCCTGAACTCCCTTCCCGCATAGCGGACGGCCACATCCAGGCATTGCCTGAAATAGGCCCTGAGGTCATTATATGTTTAAAGGG   | 4 |
| wt-100200-100320 | 831 | AGCAGAGGGGGCAGAAATTTGGCGCCGGGGAGGCCAGTACTCGGCATAGAAGACAGCGGGGGCTCCGCTCCCATCCAGGCAACCTCCAGCGGAGTTCGCCAGCTCCATCCAG       | 8 |
| wt-100320-100440 | 832 | CAGTCACTCCGATCCACAGTACGCGCGGACAGGGGACAGCAACCAAGCTCCGCCAGTATCCCGTTTTACAGAGAGAATGTCCTCCGTGGCTAAAGCGTAGATGCCTCCGTAGA      | 4 |
| wt-100440-100560 | 833 | TGAGTCCGGCCAGGAAGCTGTAGACATACTCGGGCTGCTCATGCCCGTGGGCTCCACGAAGCTGTCCGCTCGAGCGTGTCCATAAAGTCCCGAAGGTGCCGATAGCCACAGATGG    | 4 |
| wt-100560-100680 | 834 | ACTTTTTGGTCTTGCAGTTGACCGACACCGAGCTGTGCTTACGATAGTGACATTGATAGTGACCTTGACCGTTCTTCCGCTGCTCGGTGCCACCGGACCATGCTTGTGTCGGCA     | 4 |
| wt-100680-100800 | 835 | ACTGCGAGTAGTTACCGAGCGCTGCATAATCTTTTGGAGCCAGGTGTGGCCGTGAGGCCCGGAAGCCCGACAGGGCTTGTACTGGGCCAGGGGATCGAGGAAGACCTCGCACTCCA   | 4 |
| wt-100800-100920 | 836 | CCGGGCGAGTAAACATGGTCAACCCGCCCATCTCCCCGGTTCCTCCCGCGGCGACGCCCTGCCCGGACGCTTGAAGGCTGGCATGGAGGGTGTGAGGAAGGCTTGTGACCTCGGCGT  | 8 |
| wt-100920-101040 | 837 | GGGAGGAAAGCGGGTCCAGCCACTGCTGCGGGGCTCAATAGCCCGCCCTGACCGGAGGCTGACGTCAGGACGAGGCTGACGTCGGGCGAGAGCTGCGGGGAGGCTGAGGCGGACTCGA | 8 |
| wt-101040-101160 | 838 | GGGTCTCATGAGGTGCCAACTGGACGTCGCTGAGCGCTTGTGTTGATGAAGAGGGCCAGTTCGCGGCGACGTCACGTAAGTCCGCGCCCTGGGGTTCGCCACCAAGGAAGTGA      | 4 |
| wt-101160-101280 | 839 | GGATGTTGTCGACTCGCAATCTTGTACCTGGTCTCGTGCTAAAGGAGGACTGAAAGCGCTGTCTGGTGGGAGAGCCACGACAGCATGACGGAATCGCGCCCGGGGCT            | 4 |
| wt-101280-101400 | 840 | AGAGTGGGTACGACGCCAGGCGTTGAAGAACCAGTAGCAAAAGACCACGGCTTTAGAATGTGCACGGAAGCGTTCAGCTTCTCCACCAAGTACATTTGGTGGTCCATAGCTGCC     | 4 |

|                  |     |                                                                                                                          |   |
|------------------|-----|--------------------------------------------------------------------------------------------------------------------------|---|
| wt-101400-101520 | 841 | CCTGGTGCATGTCTCTCAGGACCTCAAAGGGGGGGCCAGAGACTCCCGAGTAGAGCCCCGTGGGCTTGGTTCGGCTGAACTCGGCGGCAATGTGGGAGTACCGGCCAGTATTGGCCA    | 4 |
| wt-101520-101640 | 842 | GGTCCCGCCGCTGGAGTTCTCTAGGGCGGCGTCCGTAGAGCGACCATGACTGCTGACCCGCTGCGTCATATTATGTGGCGGCTCTTGAACCCAAAGGCGCTATAGACGGTTGGGCAGT   | 4 |
| wt-101640-101760 | 843 | AGGCTCGGAGTGTCTGGGAGAGTTCTGTGCGGCCACGGTTGTGGCTCCCGTGACCAGGCAGTCCATCGTGTGGTGGAGGCAGCTAACGCTGGTCTTGGCAGCCCCCGCGTCCCG       | 8 |
| wt-101760-101880 | 844 | TAATTACATAGGCTGAAAAGGGCAGGAAGGGGGGCTCCGAGAGCTCCGGGTCAAACCTCGGGGGAGAAGCTCCATATCCGGGAGTTGTTGGACGCGGCGCCTAGCCAGGGTCCCTATCC  | 4 |
| wt-101880-102000 | 845 | TCCTGACTATACGCCTCACGGAGGCGTCTGAGGTCATGTTCAACATGAACGTGGACGAGAGCGCCCTCTGGCGCCCTCGGCTCCTCGGCCATTCTGTTACCCCAACGCGCCGCTCGGTCC | 4 |
| wt-102000-102120 | 846 | GACTTTTGGAGTCTGCAGGAAAGTACGCTACGCTACGTCAGGACAGACCATCTAGCCAACTCCGCAACCCCGGAGTCTTCTGAGGCAGGTGTTTACCATTGTTTAAACGAGCCA       | 4 |
| wt-102120-102240 | 847 | TCTCTCATGCACGTACGATGACGTGAACACGCGCCCTCAAGGCCATCGGTGGCCACGAGGCGGAGCCATGACATGACAAGGACATCTGGCCATCTGGAGCAGATCCACGCGCAAGG     | 4 |
| wt-102240-102360 | 848 | CGTGGTCCACGACCATGAAGCTGACCGTGCCTGACCTGCTGACCACCAACATCTACCGAGTGTACACAGCCGCTCCGTGCTCCTATGAGCGTTATGTGGACTGGATCTGCGCCACCG    | 4 |
| wt-102360-102480 | 849 | GCATGGTCCGCCCGTTAAGAAGCCATAACCCAAGAGCTCCACTCCAAGATAAAGAGCCTGAGGACAGGTGCGTCTGCGGGAATTGGGGCACGAGAGGACCATCAGGAGTATCGGGA     | 4 |
| wt-102480-102600 | 850 | CGGAATTATAGAGCAACGAAGGAAATAATAGAGTCCGCTCAACTCCACGTTTATCCCCAGTTTACGGAGGTGACCATCGAGTACCTCCGAGGAGCGACGAGTATGTGGCCTACTACT    | 4 |
| wt-102600-102720 | 851 | GTGGCCCGCATCAGGCTGCATGTCTTCCCGCGCCATTTTGGCGAAGCGTGCCTGCACAGCCCGGTGCAGCGCCTTACCAGAACATTTTTCATGTCTACCGCAGCTGG              | 4 |
| wt-102720-102840 | 852 | AGCATGCCAAGATCTGCCAGCTCCTGAACACGCGCCCTCAAGGCCATCGGTGGCCACGAGGCGGAGCCATGACAAGGACATCTGGCCATCTGGAGCAGAACTCACAGCGCAAGG       | 4 |
| wt-102840-102960 | 853 | ACCCCAAGAAGGAGCTGCTGAACCTGCTGGTCAAGCTCTCGGAGAACAAGACCATCAGCGGGGTACGCGAGCTGGTGGAGGAGTTTATAACGGATGCCCTCAACAACCTGGTGGACCGCA | 4 |
| wt-102960-103080 | 854 | ACCGTCTATTTGGCCAGCCCGGGGAGACAGCTGCACAGGGCCTAAAGAAAAGGTCTCCAACACGGTGGTCAAGTGTCTGACTGATCAGATAAACGAGCAATTTGACCAGATTATGGCC   | 4 |
| wt-103080-103200 | 855 | TAGAGAAGGAGAGGGAGCTCTATAAAGAAAGTCCGCTCCATGGAGTCTCAGCTGCAGGCCTCCCTGGGTCCCGCGGCAACAACCCAGCGCGCTAGCCCGCCCGCAGTTGCGGCAG      | 4 |
| wt-103200-103320 | 856 | AAGCCGCTGTGTAGATATACTGACGGGACGACCCGCTCCGCAATCGAAAAGCTGTTCAACTCCCGTCCGCCAGCCTGGGTGCCAGGGTGTCTGGTCAATGAAAGCATCTTAAACA      | 4 |
| wt-103320-103440 | 857 | GTTTCGTTTCTCAATACATCCCCCTTCCGCGGAAATGACTAAGGATCTGACTGAACTTTGGGAAAGCAGCTGTTTAAACACCTTCAAGTTAACACCCCTGGTTGATAATCAGGGGACG   | 4 |
| wt-103440-103560 | 858 | GTCTCTACGTACATACTCGTACAGACGATCTCTATATTATGGGCCCTTACCTATCTGGTGGCAGAGCTTTACCGGTGGAACCTGTCAGAGATGTCTACGCCACCCTAGGCATCG       | 4 |
| wt-103560-103680 | 859 | TGGAGATCATCGACGAGCTCTACCGGAGCAGTCCGCTGGCCATCTACATCGAGGACCTCGGTGCAAAATAGTCCCGCGAGCGCGACCGGGGAGATCATGGCATCCGGCAAGCACCAT    | 4 |
| wt-103680-103800 | 860 | CAGCCCGGGGGACACGGAGCCTGACCATGCAAAAAGTAAAGCCTGCGCGTGCACCCCGCCTGGTGTGGAAGTTAACCCGCAATAACGCCATCTGCGTGGCCACCAAGCTCCCTGAGTTC  | 4 |
| wt-103800-103920 | 861 | TACAATGCCAGGGGGACCTTAACTCCGAGACCTCCGGGCCACGTCAGGCCCCGATGATCTCGTCCAGTTTGGCGGTACGTCCTCGTGTGACTGCTGGACTCCGAGGACCAGGTC       | 4 |
| wt-103920-104040 | 862 | GACCACCTAACATATTCGCCAGCTTCTCCGAGAGGATGCTGTGACAGAGGATGCTCTGTGACAAACCCCAACAATGTAGGATGTGCGCCCTGCTCGATGATTGAGAATGCCAAGAGCCCG | 4 |
| wt-104040-104160 | 863 | TCCATAGCCCTCTCCGGGAGGTGCTGGGTGCGCTGACCCTCTGCACTCCAAGTCAACAATCTGGACTCTCTGTTTCTGTACAATGGGGCCAGGACGCTGCTCCACCCTGGTCAAG      | 4 |
| wt-104160-104280 | 864 | TACCACGACTGGAGGAGGGGCTGCCACCCCGGGCGTGAATGAGGGCTGAGTCTTTAAAGTGCACAAGGAGCTGAAGCGGCCCATCCGAAGCCCGGGACCTCATGCAGAGC           | 8 |
| wt-104280-104400 | 865 | CTTTTCTGACCTCGGGGAAGTGGGGTGCCTGGCCAGTCAACCAAGGATTACTGCGCGGATCTAAACAAGGAGGAAGATGCCAACTCGGGTTCACATTTAACCTGTTTATCAAGAT      | 4 |
| wt-104400-104520 | 866 | TCTTTATTGACCAAGCATTCCAGTGCCAGACCGTCCAGACCTTGAGACGCAAGTGCCTGGGAGTGACACGGTCTCAAAAATAATTCCTAGAATAAAGTGAAGACAGTCACTAGT       | 4 |
| wt-104520-104640 | 867 | AAATGTCTCTCGCGTGAATTTCCATAGGAATGGTGTAGCCGGGTGGAGGGCCGATATACATCAAGCAGAAAAGCCATATCTCTCGAAAAGTAGGCGGTGGGGCTGAGACCATGCTCA    | 4 |
| wt-104640-104760 | 868 | GTGGCCGTCTGGCAGGGGGCCGGCGCCTTGTCCAGGAGACACACTGGCTTCCAGAGAGGCGCAGCCAGCCCTCCGAGCCGCTGAAGCCAGGCTCGGGAAAGAGCCCAA             | 8 |
| wt-104760-104880 | 869 | AACCTGTTTCGGCGCCCGGGGGCCAGTCTCCGGTCAAGTGCAGGACCGGTTCAACAGTGGTGGTGGGATGGCGGGCCCTTGTCTGCCTCGGGTCTCGCCGCTAGTTGGTCCAGG       | 8 |
| wt-104880-105000 | 870 | GTCCAGGAGAAGGCTTCGTGCCAAACAAAAGGGCCCGGAGTCTCCCTACATCCACCACGTAAGATCCCCCTGAAAGATGCCATCAGTAGGCACCCGGGCCCGCTCGAGCCTTC        | 4 |
| wt-105000-105120 | 871 | ACCCGAATGTGTCTCGGGCCACGGTGGCCTCTCCACCATCACATCCCGGTGCAGCCGGCTGGCATCCTCCGAGTCTTTCACGCCCTGCAGGAAAAGCCTAGGAGATACAGCAACAGAAA  | 4 |
| wt-105120-105240 | 872 | GCTATTAGCCGGTGGTTCCCCACCATATCTTCTGTTAACGGGAAGATAAGAGTTGGGCAAAACCCCGGGGCGCGCTCTCCACCAGCCCGCTTCTCACCTGTGCTAGTGGCT          | 4 |
| wt-105240-105360 | 873 | CCTCTGAAGGATGGCGGAGGTTGGTCCACAAGGCCAGGATGAACCTGCTGCATAAAGCCAGGTGCTCCTAGGTACAGCGCCGCTGTAGGAGAACCAGGCTGACGGCGGTGTAGA       | 4 |
| wt-105360-105480 | 874 | GGCCCCGAGTGCCGTCGCGTGTCTGAGGTGCCATAGCGGTGAAGGGCCCGCAGCCAGGTTTGCCTGTCGCGCCTGCCCTCCGCCATCAGGCGTTCACACGGGGGCGCCCTGGCAG      | 8 |
| wt-105480-105600 | 875 | AGAGGTGGCAGCGGGCAATTCTGAGAGCCACCAAGTGGCATCAGCCTCAAGGATGGCTGTGGCTCCGCGCGCCGACACCGTCTGCTCTCCCCCTCCCTCGCCGCTTCC             | 8 |
| wt-105600-105720 | 876 | GCGTCAAACTGGCGAGGTTAATCTCCTTTCCGGTCCGGGGCCAGATTTGTTGAGGAGCAGCGAGCCGCTGTTGCCCTGACCCGCGCTGAGGCCCCAGGAGGGCGCTCTGCCAGGG      | 8 |
| wt-105720-105840 | 877 | GCGTCCAGAGACTCCAGGTTCCAGTCCAGTAGCAGGAGCCCTCGCTGTGTGGCCCGGTGCCAGAAGCCGGCTCGCCCTCCACATAATGGATGGCAGGAAGGAAAGCCCG            | 8 |
| wt-105840-105960 | 878 | GGACATAGGCTGGAATCTGAGCCCTGGGCGAGGTTCCGGGTCCAGGAGTGAAGATGGGCTTGTGCCTCTGTGGTTGGCGTAGCAGGAGGCATAGATACTGCGGAGGAAGGCGT        | 4 |
| wt-105960-106080 | 879 | AGAGCCCGCCCGGCCATACTCCAAGAGTTGACAAGCCAGGACTCGAATCCCCAGCCGGCTCAAGAAATTTTACGGCTGACGCGGTGCCGTGGGCGTCCCCACCAGCGCCGTGGCC      | 8 |
| wt-106080-106200 | 880 | CGTGGAGCAGCACCAGATCTACTTCATAAGTGACCGGTGCGAGGATGTCCTAAAGGGGACGGGAGAGGGTGTGCGGAGTCTCGGTGGAATAGGTGAAAACATCCCACGCGGTGTCC     | 4 |
| wt-106200-106320 | 881 | TGATGTATACGTCACCTGTCCGGGAGACTCAGAGTGCCCTGAGCATGGGGCATGTCTGTTCCCCCTCCATCTCGGACCCGAAGCCATCAACAGTGGGGGTTTGGTCCCGCCAT        | 4 |
| wt-106320-106440 | 882 | CATCCCCGAGCAGCTTTGGCAGACCACCTGTGCTGAAAGAGAGGCTGGAAGATGAGGCCCTGCTCATCTCCACCCTGGCGGCGGACAAGAGTCTGCGGTCTCGGGTTCTAAATGAAA    | 4 |
| wt-106440-106560 | 883 | GGTCAAAATAGGTCCTTCCGGCGGATCGGCGAGCATAGCAATGAGCCCGCTGCGCTGAGCTCCCGTCCCATCGCAAAAAGTTGAGTTCGTTAGTGGGGCGGCTTGGCCACGG         | 4 |
| wt-106560-106680 | 884 | GGGGTCCAGGGAGCCTCAAGCGCGGCTGGCAGGCTGCACCAGATCAGAGTCTCAACGCTCCCTTTTGTAGGGCAGATGCCACGACCCAAATCGCCACCACCGCCCTGCGG           | 8 |
| wt-106680-106800 | 885 | TCTGGTAAACATTATAAAGGTAACCGAGCTGACGCGGCCCTGACGCTCTCCGCGGTTTCCATATTGTTGAGATCTGAGGAGGACTGGACCTTTAAACATCCGGTACAGCCC          | 4 |
| wt-106800-106920 | 886 | TTTGCAAAATTTTAAAGGTAAGTCTCAACTGAGACCATCGCAATCATGAAGTCTCCAAAGATGACAGTTCGCTATAGAAGCTGGGTCAAACCGCTGTTGTGACTTTGTGATG         | 4 |
| wt-106920-107040 | 887 | TTTGTCTGTCGGCGGTGGTCCCATACCCGCGATTTCCCAACCTGGGGTACCCTGCTACTTTAAACGACTGGTTGATTACGGGGCACTTAACTGACCAATTAACACTGGCCAC         | 4 |
| wt-107040-107160 | 888 | CACCTGACCCACGCTATCTGAGCGCGGAGATGTTTCTACATACACTGGTCTTTATCGCGACTGGCTGGCTTTTACTACTACGCTCGCGGAGGTGGCGCTAATCAAG               | 4 |
| wt-107160-107280 | 889 | GCCCCAAAAGGCTCGGGTCTTACAGACCTCTCGGCTGGTCTCGCAGTGGGCTCCCAACCGCTGTTTTGGCCATCCTCAAGCTCTGGTCCATACAGGTTCTTCCAGGTC             | 4 |
| wt-107280-107400 | 890 | CTTCTACAAGCAGCTTTCTCTCGGCTTTGTGACTTTTGCACCTTCTGGCCTCAGTCTACACGCTCGCATGTGTACCCGCTTCTCCCGGTCTGGTGGTCAAGGCCAG               | 4 |
| wt-107400-107520 | 891 | GACAACCTATTCCCAGGACACCTTCTGTGGTGGTGGTCTTCTACCTGAAGCCGAGTTACAACCTGTACCTGGGGTGCCTTGCCTGGAGACGCTGGTCTTCTCGCTCAGCGT          | 4 |

|                  |     |                                                                                                                        |   |
|------------------|-----|------------------------------------------------------------------------------------------------------------------------|---|
| wt-107520-107640 | 892 | TTCTGGCCCTGGGCAACAGCTTTTACTTTATGGTGGGGGACATGGTGTGGGAGCCGTAACCTCTTCTCATCTGCCATCTTCTGGTACATTTGACGGAGGTGTGGCTGGCCTCC      | 4 |
| wt-107640-107760 | 893 | TTCTGCGGCACAACCTTTGGCTTCTACTGCGGCATGTTTATCGCCTCCATCATCTGATCCTGCCCTTGGTCAGGTACGAGGCCGCTTTGTCTCCGCCAAGCTGCACACCACTGTGGCC | 4 |
| wt-107760-107880 | 894 | ATCAATGTGGCCATCATACCTATCTGTGCTCGGTGGCCATGCTCATCAGGATATGCCGATTTTCAAAGCATGCGCCAGGGCAGTACTATGTCCCTGTCTCGGAGACGGTGAAGT     | 4 |
| wt-107880-108000 | 895 | GAGCTAGAGTCAGAGCCGAGGCCATAGGCCCTCGCGCACGCCATCACCCGGCGCAACCGCCGCCGCTTCTTACGTCCTCATCTTCCAGGTCACACAGGAGACAGAGGCCCGCTCT    | 8 |
| wt-108000-108120 | 896 | ACCAAGCCCTCGTCTCCTCCGTTTTACCGATGACGACGCGAGCGAGGAGGATCTCCCTAATGCAATAAAAACTTAAACACTGAGGTTACTTTCCCGTCACTTTTCGGGGGAA       | 4 |
| wt-108120-108240 | 897 | CGAGGGAGGCGGGAATTGGTAAAGTAGGCGGAAGGCGTGGGGTGGTGCAAAATTTGGGCTGGAAATGGAGGGGAGTGGGCTAGGTCCGCACCCGGGTGCCAAGATAATGG         | 4 |
| wt-108240-108360 | 898 | ATTGAGTAAGCATGGGGCTGTGATCGGTCCGCGGGTCTCAGGGGTGATGGGTGGGCATATTTTTGCCGCGGTGCTGTTGGGCTGGACTCGGGGTGATCATCCGTTACCA          | 4 |
| wt-108360-108480 | 899 | TCACCCGACCCCGCACCCAGTCCACAGCCACCGCCAAAGTCTGGGCCTCCACCACCGTTATGCCTCCCCCTTACCCTAATAATACAAGAGATGTTAGTTGGTTTTTATTTGGC      | 4 |
| wt-108480-108600 | 900 | AAAAACAGCAATTCATCATTTTCCAGAGTCTCATATATTCGAGCCCTCGTTGGTTTTCCCGCAGGCCCTCCCTTCTTGGCCGCTATTAGCTTAGTAGTCTCCAGGTTAAACTCCTCA  | 4 |
| wt-108600-108720 | 901 | TAGTCATTATACAGGTTGATTATTTCCCGCTCCACGTCGCTATGGAGTTGACTCGTCTCGGCAAGAGACAGAGGGCACCCTAGGCGCGGTGTCAAAGTATTGTCTGCGTACGCC     | 4 |
| wt-108840-108960 | 903 | GCGTGCAGGTGCGCGGGTCTAGAGGCGACCGTTTTGCAAAAGAGCCGCTCAAAATGTTCCACCCGGGTGACAGCTCTCCCGGGTCCACCCCACTGTGGCGGACGTCTCCAA        | 4 |
| wt-108960-109080 | 904 | CAATTTGTATTGGAGGAGCAGCTGGTAGAAGTAGTTGTGCCGTGGATTGACGAGATGTTGACTGGACCCCGTCTTTAATACCAATGCGCCCGCATTTTCGTTGGTCCGTCATTA     | 4 |
| wt-109080-109200 | 905 | CGTAGAGCATAGACTCCACCCCTGTTGGCAGCTAGGCTGTCTGCCACAGGTCATGACCGGGGCCAGTTTGGCCTACGGACATCTTAAAGATCCAGGCCCTCATCTGCGTCAACA     | 4 |
| wt-109200-109320 | 906 | GATAGTACCCTCCGAGGGCAACCGCCATCCGGGACGTAAGTCCACGGTACTCCAGGACGAGTATAGAATTTGATAAATCTGATAAATGACCTCTTGCATGGCCTTGTAAAGGCGAGT  | 4 |
| wt-109320-109440 | 907 | ATGGGTAGATGGGTCAAATTCGACTTGGAAAAGAGGTAAGTGAAGCGGCACTTAATCTCATAAATGCAGCTCCGGTGGTGAACAGTATAAAGTCTCCCTGTGACTCCACATTTGACGC | 4 |
| wt-109440-109560 | 908 | AAAGATCCAGAGACACCCAAAAATGCCATCCGTGGGACTAATCATAAAGCCAAATGACGGTTGGCGGATGCGTCCCGCAGATGAGCTTACAGACAAATGTCCTTGACCGTCTCCTCAC | 4 |
| wt-109560-109680 | 909 | ACCGCAGGCCAAAGGCCACAGGTCGCCCAAAGTAGTATTGTGGAGATGGGAGCTGGCTCAAAACACCTTGGTGGGTCCATTTAATGGTGGAGAGCAGCTTGGAAAGAGAAATTTATGC | 4 |
| wt-109680-109800 | 910 | CATTTGCAATATGTCCACATCAGGTTCTCAGACTGCCCCCTGGTTCATGGACTCCACGTCAGAGCAGAGAACAGTCTCTGCTCGTGGTGGCCTCTGTAGCCCCAGTAAATGGATT    | 4 |
| wt-109800-109920 | 911 | TCAGGGAGGACCGTCTTGTCTCATCTCTTGGACTAACGAGGAGACAAAGTACAGAAGCCAGTTTACCAGAGAACTTGTATTTGTTTACAGAGGCAATAGAGATAGACAAAGC       | 4 |
| wt-109920-110040 | 912 | GCATGGCCGGCATCTGAGGTGGACGGTCAAGGTTACGGACAAAGGCCCTAGTCTCCGGACTGCGGAGGAAAGCGGGCAACCGTGTAGGAGGTCATCTCCATGGGATCCTCGAGCTCAT | 4 |
| wt-110040-110160 | 913 | CCACGTCGGCCATCTGGACCAAAAGTCTGCTGCCAAGAGTTCAGCTACCAGACCTGGAAGATGAGGGTGTCAAACCGTGGGCGACAGTTGAAGAAGTAGCTCTCCTTGAACCTCTTT  | 4 |
| wt-110160-110280 | 914 | TTAAGGCTCCGACACCCTTGGGCTGCAAAATGCAAAAAGTAGAGCGGGTGGATCGGTCAAATCCATGTCAAGGTTGGGGTAGGGGATTTTGTGGTGGAGTCAAGGAGGTGCATG     | 4 |
| wt-110280-110400 | 915 | ACCTCAAACAGCACACCTTTGGGCTGCAAAATGCAAAAAGTAGAGCGGGTGGATCGGTCAAATCCATGTCAAGGTTGGGGTAGGGGATTTTGTGGTGGAGTCAAGGAGGTGCATG    | 4 |
| wt-110400-110520 | 916 | ATACCATAGAGCAGCGAGTAGCGGAGCTGCAGATCCAGGCAAGGGCCGCTGCGCCCCACGGGGCCACACGCCGAGGGGTGAGGATGTGCCAGCCCCCTCAAGATGTAGCAC        | 8 |
| wt-110520-110640 | 917 | TTGCTCAAAGGACAGAGGGGCTTATAGGTGCTTGGCTATAGAAAATGGTTCCTTGCAATAGAGGCGATAGAGCTCGCCGCCCTTAGAAGACTTTAGCCGCACATCCAGCATCTTG    | 4 |
| wt-110640-110760 | 918 | TTGCGGTGTTGGAGGGAAGCAGTCCCAATCAGTCAGGACCAAGCTACCCATGCCACATGGTGTCTGTAATCCACCAGGATGTTGCTGGGGCTAATGTCCGAATGGAAGAGGGCC     | 4 |
| wt-110760-110880 | 919 | CAGTGGCATTGCAAAAGTAAACGGCATCTTTGAGGCCCTGAAAGCCCGCACAGGGGCTCAACTACCATCCATGACGAGTGGCCATAATCTGGAGACTGCATCTGAATCGGGCCG     | 4 |
| wt-110880-111000 | 920 | AACAGGGCTGGCAGGACGTCGACGGCCAGCAGTAGTCCACCCAGGCGCTCTCGGCCCTCTCGGCCCTTCCCAATCTGAATCATGTACACACCATGAGCTCGTGAATACAGC        | 4 |
| wt-111000-111120 | 921 | TCCGTACAGAGTCATAGAGTTGACCGTGGCATTATCTGCATGTGCATACACGGCCCGTAGCTCCCGCCCGCAGCAGATACTCGCAGGTAATGGGGAGGTGATCACAGCGGTCATG    | 4 |
| wt-111120-111240 | 922 | TTCTCCGCGACCTTACATAGAGGGTCTCCGTGATGTCATCAATGTTGGTCACTTCAGGTGTTTGTGCTGAAAGGTGAAGTAAATCAATGACAGTCACTTCCCAAAAAGGCCCTGGGTC | 4 |
| wt-111240-111360 | 923 | TCTCGAGGGGTTCTGGGGAGACACTCAACTCGCCACTGCTGGAGGAGTTGCTGGGCTCAACTCCCGACCCATATTCACATCCATGTTCTCAAATGGCTCGAGGGCCTGTGCGAGCTC  | 4 |
| wt-111360-111480 | 924 | GTCTCTGGCCTCAAGCTCTGCTCAGGAGCTCTCCACCCGCTAGCTGCTGTGATGTTGTTTGGAAATGAGTCTTGGTGGCGGTGACCACCTCTGATAGGTAGAAATAGCTG         | 4 |
| wt-111480-111600 | 925 | TTGGACTCAAACGTCTCCCTTGCCTGGCGCAGGGACTCAAGGCCACCCCGAGCAGATGAAACTGTGTTTCAAACAGAGCGTGGTCCCTCCCAATCTGTCAAGTGCCTCACAGCCG    | 4 |
| wt-111600-111720 | 926 | TCTCTTTTCTACCAGGCTCTTAGTTGCTGGGCCACAGATCTCGCTTAGAAGTACTCATCTTATAAGTACCATGTCGCCAATGAGAGCCAGATCATAGTGGGGTAGAGTACGG       | 4 |
| wt-111720-111840 | 927 | TAGTCCAGTGGAGGCTCCCGGTAATTTCCACAGGCTCCACCATATATCTTCTGCTCTCCGTTAGAATTAGGCAAGGATCATACGTGTCACCCGGCCTTTTACTGAGCGTTTA       | 4 |
| wt-111840-111960 | 928 | GGTTTTGTTATGATAGCAAGCACAAAAGGCACACACGAGTGATGCAAAAAGGTTCTGAGGCAGCAGGAGAGCTGTTTGGCATTATTCAGGGCGCTAACGTCAAAAGGAGGAGCTA    | 4 |
| wt-111960-112080 | 929 | TATCTCACCTTCCAGTCAAGCAGCTCAAAGTACAGGGCATAACACACCTGGTGGGTTGCCAGGAATGCTCTATGTTGGCAGATGGTGTATAAACCCAGTGGGTAGCAGAATAG      | 4 |
| wt-112080-112200 | 930 | GGCCCCTTTTGCCCGTGGCCGACGTAACAGCAGTGAAGCTCTTCCGAGTGGGACCTGGGGCCGTAGAAGAGGGCCACATCCAAGGGAGTGGGTCTTCAAGGACCCAGGAGGTCCAGG  | 8 |
| wt-112200-112320 | 931 | TTTGGGAGTGGCCAAATTTGCAAGGCCTGACCTATAACCTCATCTTTGTTCCAGGCCAGCGCAATTCGCATAAGTCCCCATCAAACACCTCAAACACAGACCCATGCCATTTCAG    | 4 |
| wt-112320-112440 | 932 | GCTGAGAGGGCTCCATCCGGCTCGACCAACCTTGTCCACAAACTGCCATTCTTCTGGTAAACGGGGTGGAGGGCAAGAGCTCAAAGCCAGGCTCGAGAAGTCATAGTCATCCTCGG   | 4 |
| wt-112440-112560 | 933 | CCACACGGCCGAGCTCCGGGCTCGTCCAGGGCCTGTTGCTCGGGGAGGATATTGACACAGAGAGGAAGCTTGGAGTGGCGTCCACACAGTTAAATGCTCGGGCGTGTCT          | 4 |
| wt-112560-112680 | 934 | GGCAGGCTCCAGTGCAGTCCAGACTGCCATACCTGCGGGCAGCATCGGGTTCATCGGGCATATCGCCCTTACCAGGCTTGAACATGCTGTATGCTCGCAGCGCGGCTGTGA        | 4 |
| wt-112680-112800 | 935 | CCGAGAACCCTAAGAAACGCCCTTCAAGCAGCAGCACACCAAGGCTGCTGGGTGCCGAGACCCGAGTATTATGTACACAGGGCCAAAGTCAGACAGGTTGGGCTCACCCCTGGTGG   | 4 |
| wt-112800-112920 | 936 | GCACAATTCAGCCAGTAATTTATTTGCCAATGCTTCGAGCATACTGCCCCACTATGGCCCCAGGCCGTTTGTAGCTTCTGATGAATCATTACCATGTTGGTGGCAGCCCTG        | 4 |
| wt-112920-113040 | 937 | CCCTTACACCCAGTCCAGTCCAGATGTGCTACTACCAGAGCTACGCGACAGTTACAGCGCTGCTGCCACCACCAATCTTGAAGACTCCGAGGCTTGCAGGAAATCAAGACCA       | 4 |
| wt-113040-113160 | 938 | GCGTGTCTCTGCCGTGCCATCCTTGAAGACCCCACTTTTGGAGATGAGAGATTTGTACCAGCCTGGCCAGCTTCTGAGTGGTCAAGTACAAGCACAAGCCCGCCGCTAGAAG       | 4 |
| wt-113160-113280 | 939 | CATTCAGAAACAAGTAGTGTATACCTTTTATTTCTGATCTCAATCAACTTTAGAGATACAGACACCATGTTGACATCTTCAAAGTGTCTTGGATTGGAAGAAATGACGC          | 4 |
| wt-113280-113400 | 940 | TGGAGAAGCTGCACATTTTAAAGCAAAAAGCCAGCTGTTCTTATCCCGAGCCGACGCAAGCTGGATGCTGGCCATCATCAGCCTATCCTCGAATCTCTCCAAGTGC             | 4 |
| wt-113400-113520 | 941 | AAATAGGCTACGTGGCTCACGAAACATGTCGCGTCCGCTTTTCACTGAAATATTGACACCTTGAACAGAGCTTCAAGCTTCAAGCTGAGAGTCAACAAGGAGACAGCACCA        | 4 |
| wt-113520-113640 | 942 | TCACGTTTAGGCACAGTGGGAAATCTCCAGCACCGTAATGTGTGCCACCTGCTTCAATAAAGATGTAAGACCTGACGTTTCACTACTTGGCAATGTAGAGCATAGCCCGCTGTAAG   | 4 |
| wt-113640-113760 | 943 | GTCAGAAAATCGCAGCAGGGTCCAAGTTGTGCTGTACATGGGACCTTTCCTCATTAGCAAGAACCCCTGCAGGACACGTCATGTCGGGTGCATTTGGTGGGTTAAATCTCAG       | 4 |

|                  |     |                                                                                                                               |   |
|------------------|-----|-------------------------------------------------------------------------------------------------------------------------------|---|
| wt-113760-113880 | 944 | TCCCACCACAAAGGGGGCATCTCCGGTTTGAACATCAGACCCAACAAGCCCGATGCCAGTTATGGGTACGTAGTCGTTGTTCCAGGGCCGTGCATGGCAGCAGACAAGGACAGGTGCC        | 4 |
| wt-113880-114000 | 945 | AGATGTGCCTGGGCTATCGTCTCCGTCACGCCACGCAGGATGTTACAGTGGGCCCCGGCCACCATAGCATGTCACACATTCCCCTTATCACATCTGGTTAGCAGGTTGATAAAATGGGT       | 4 |
| wt-114000-114120 | 946 | CAGTGATGAAAGGTTGGCATAATGGGGCAGCAGCATCAGCATGTCATGTTAACGAAAAACATGTACAGGGCCCTTCTGCATACCAGGCACCACCCCTGCCAGTGGGATGATCTCCGA         | 4 |
| wt-114120-114240 | 947 | GGGTGTGATATCTTGCAGTCTTCTACTGTTTAAACGGCGGTTGAGGTGGTAAAGACGTGGCCCGTGGTCAGATCTGTGCAGGTGACTACAGGGTTACCCCTAATCTCCACAGGCACCCG       | 4 |
| wt-114240-114360 | 948 | CTCACCCACTGCATCTGAGAATACCCCAAAGTACATGAGAGTACAGGCTGTGTGGCCCTGGACTGCCTTAGTGAAGAGAACCTCGGGCCTGGCCACGGTGGCTAGGGTTCATTGATGTA       | 4 |
| wt-114360-114480 | 949 | GACGGTCACATAGGTGGGCTTCTTGGGCTTCAGCACAATGAGGGTAACATTCATGTAGGTTTAGGAGTCCGGCTATCTGAGGCACGTACACAGCTGACACGGCGGTTGGCCGT             | 4 |
| wt-114480-114600 | 950 | ATAGACTTTTCACTGGGGCGTAGAGCATCGCTCAGCACCCAGAGGCACCTCTTGTGAGGAACCTGTCGAAGCTTCCCGGCTACTGTTCCGGCCGATGCCATGACCAACATAGAGAT          | 4 |
| wt-114600-114720 | 951 | ATCCCTCTCCTCGGGGGTGAAGTGCCTTAAATAACAAGCCCCAGGCAGCACCACAAAATGCCTGCCCTCCGATGTGGTGGCCAGGTGGACGCAGTGCCTGTCAGTTCCAA                | 4 |
| wt-114720-114840 | 952 | GGGCTACTAGCTGGGAAGCAGCCCAACCAGCCACCCGGGGCCGTGGAGTGCATCACCCTACCCAGGCCGAGGCCCTTCTCATACAGCGGGTGGCTATCTATCCATAGGCAGGCAT           | 4 |
| wt-114840-114960 | 953 | CCGGCGCTTTGGTGCATTGGAGATAGTAGCTTTCACCCAACAACCTTCCCAACTAACCCGTGTGGACAGTGAAGAAGCCTTCCCTGATCAGGTCTGAATTTTTATAGATACGGGAGT         | 4 |
| wt-114960-115080 | 954 | AGGAGGTGGGAATAACAACCTGGGATTTCTGTTGTGCTGTCCAGGCCCTGCATGCCAGTTTTTCCCTGAAGCTAGCAGAAATCTGAGGGCCACTGAAATGAGGAAGCGAAACTCCCTCT       | 4 |
| wt-115080-115200 | 955 | CTGGAGCTCCCAAAATGAAACCTCAGCAAGATCTGTTGCTGGGGAGGCATGGGTGACAGCTGTCCAGTGTCCGCTGGGCACTGAGCTGCCCTGGGCACTCAGCTTGGATATGTGACAACATAGAG | 4 |
| wt-115200-115320 | 956 | CGTGGGGGCTAAAAATATGAGCAATTCCTGACCAGGGCCCTGGACTCACGAATGGCCGACGGGCTTATAGAAAGAAACAGGCACCCTCGAGAGTGCCTCCGACCCGACCCACCCACAG        | 4 |
| wt-115320-115440 | 957 | TGCCGCCAGTCCCTGCTGGCCTCCGCCGCTTCCCCACCGGCGCTCCCCGGATGTTGCTGGGGTTCGAGGGCTGGTGGTGGTGGACACAGAGGTCTCAGCAGCCGCTTGGTCT              | 8 |
| wt-115440-115560 | 958 | CGGCCCGGCCCTAAGTCTGAGCCCAAGGAAAGGGCCGACTCCAGCGTGGCCCAACCTCTGCTCCCTCTATTCTCCTCTTGGCTTATCTCCAATAGAATTTGCTTGAAGTCTATCCG          | 4 |
| wt-115560-115680 | 960 | CCTCTGTATAAGATGCCCTCGGTGAGAGCCCTTTGGCCCCCTCAAAGAGAGACAGGTAATAAATCTGTAGCTCCCAACCAGCCCTCTCATCGTAAAAATCGAAGGGCGGCCACGT           | 4 |
| wt-115680-115920 | 961 | GGAAGGGGTTGAGAGCTCTGGAAGGCCCTCATCGCAGTACACTGGCACACTGGTAAACGTGCCCGATGGCTAGGCCCTCCGGGCGAGCATGCCCCGAGCAGCAACACCGCGCAGACCC        | 4 |
| wt-115920-116040 | 962 | TCGTGAGACCCGTCGGTCACTGAAGAGAGTCTGGCACCAGGCCCTCGCAGTGGTGGCACGCGATTGGGGCAAGGCTCTGCCATAACCGTGTCCGGAACAAATAGGTGCACGAGGAGGG        | 4 |
| wt-116040-116160 | 963 | GGTCCCGAGGCCACTCAACACTTGGTTGCAATGTGGACATCCATAGCTCTCTCATGCGTTTGGCTACAGCATCATAGCGCTTGTCTTCTGGTGGATTTAAATAACAGGGCCCGCTAGAC       | 4 |
| wt-116160-116280 | 964 | AGTCTTTTGTGAGTAAATAGAGATGATGACATGGATGTAGAGACTGAGGACCACATCCACACCTTCTCGGAGGAGGCCCCCTAAACAGCATCAGGCAGCAAGGGAACACAAAGGAAAC        | 4 |
| wt-116280-116400 | 965 | CAGGGCCGGGATGTGAGGCCCTCAGCCGCCCTCCTGATCAAAGAGGGCCCTCGCTGACCCCGGAGATGACATTCTCATTAGAAAGTGTGATAGAGGTGATTGACCACAGTCTTAACCG        | 4 |
| wt-116400-116520 | 966 | GCCCTGGACTTGTTCAGGCTCCACTGTCGCCGTGGTCTGTGCTTGTCCGATTCGAGTCCAGGCCCTCAGCCCGGCTGGAAATGCGGGCCGATGAGTTGCCTGTAAGGGCGCA              | 4 |
| wt-116520-116640 | 967 | CACCACTCCCTCATGGGTCTCAATCAGGGTGCACCTCGTGGATCCATACATACAGTGGTACTCGCCACAGCCCAAGCAGGCAAAACAGGAGGCCATGCTCTCAGGTAACGGGAGATGGAA      | 4 |
| wt-116640-116760 | 968 | CTCCAGCTTACTATACGAGCACAGGTGGCGAGGATTGGGCTCATCGTGGCCCTCCCGCGGGAGGCTCAATCGGCTTGGTCTGACATTCCACCCCGCCAGGTCCAGGAGGGTG              | 8 |
| wt-116760-116880 | 969 | CAAATATTCTCCAGGCCTGCACCTCAGAGACCTCTGCTCAAAGAGACCTCCACCCGACAGTACAGCAGGGCCACCGTCCGGGGAAGGTGAGTGGGGTCCAGCTCAGCAATTTCTCCA         | 4 |
| wt-116880-117000 | 970 | AATTTCTCTCCCAATAGTGCCTCGCTTCTTATCCTGTCTTTCAGAGCATCCGGGGGCGAGCAATTTACCTCTTGTGTTGGACGAGGCTAACTTTATCAAGAAGGAGGCCCTGCCGGC         | 4 |
| wt-117000-117120 | 971 | GATCCTGGGCTTTATGCTTCAAGAGATGCCAAGATATCTTCACTCGTGTGTAACCTGGCTGACCAAGCCACAGCTTTCTTTATAAGCTGAAGGATGCTCAGGAGCGGCTGCTGAA           | 4 |
| wt-117120-117240 | 972 | CGTGGTAAGTTATGTGTGTCAGGACATCCGGCAAGATTTGACATGCAGGACAGCATGGTCTCATGCCCTGCTTTCGCCTGCACATCCCGTCTACATCACCAGTGAACACGGCCACCTCG       | 4 |
| wt-117240-117360 | 973 | AGCAACCACCAACCTCTTTCTGGACGGGCTTTAGCACCGAGCTGATGGGTGACACCTCTCGTGGACAGGGTAGCCTGAGCCGACTGTGCGTGCATGCCATCAACCAGCTGGA              | 4 |
| wt-117360-117480 | 974 | GCTCTGCCGGTGTACACCCTCAACCCCGAGTAGCCGGACGCTAGCCTCCTCCCTCTACGTGTACGTTGATCCGGCCTATACCAACACACATCCGCATCAGGCACCGGAATCGCCCG          | 4 |
| wt-117480-117600 | 975 | CGTGACTACGACAGGGCCGACCTAACAGGGTTCATCGTCTGGGCTGGAACTTCTTCTCAAGGACCTAACAGGGGACGCTGCCCTCCAGATCGCCACCTGCGTCTGGCCCTCGT             | 4 |
| wt-117600-117720 | 976 | CTCCTCGATCGTCAACCCTGCACCCCACTGGAGGAGTGAAGGTAGCCGTGGAGGCAACAGCAGTCCAGACTCTCGGTTGGCCATTGCCTCAATCATTGGGAATCCTGCCCTCCCT           | 4 |
| wt-117720-117840 | 977 | CTGGCCCTTGTGCACACCAAGGACAAGACGTCAGCCTGACGTCAGTGGCCATGTACCTCCTGACTAATGAGAAGTCAAGGCCCTTGAAGGGCTCATCTACGCAGTGAACACGGCCAGCCT      | 4 |
| wt-117840-117960 | 978 | TTCTGCCAGTCAGGTCACCGTCTCCAACACCATCCAGCTCTCCTTCGATCCGGTCTCTATCTCATCTCCAGATCAGGGCCATCAAGCCCATCCCTCTCCGCGACGGTACCTACACCTA        | 4 |
| wt-117960-118080 | 979 | CACCGCAAGCAGCGCAACCTCTCTGACGACGTGCTGGTGCCTAGTGCATGGCTCATTTCCTGCAACAACACAGAAGCAGCTTCAAGAAAGTTCATTAACCTTTATTGACTACACC           | 4 |
| wt-118080-118200 | 980 | AGTCCCTTGTAAAGCGACGGTCTCGCTGACGGCATTGTCGAGCAGGGCTTCTGTCAGGGGCTTGTCTTGGCGGACATCATTAGCCAGCCGCAAAATCAGAAATAGCATCAGAAAA           | 4 |
| wt-118200-118320 | 981 | GTGAGCCCAACACAGGTCAGAGAGGAAGACCCTAAGATAAAGATGGCTGCTCTCATCTGGAACGGTGGGAAGCTCAGCAGTGTGTTTTGTGGCATTGGACGTCCTTTGGAG               | 4 |
| wt-118320-118440 | 982 | GACAGCGTGGGGCCAAAGTGGTAGCCGTTGGTAATACGGGTAGTAGCACTGGTGGTGGAGGAGGACCTGGTGGTGCATTTGCTAGTGCACACCCGTCAGGGTTCCTGTTCCCGCCTCGGTG     | 4 |
| wt-118440-118560 | 983 | GCAGTGATGTTCTGTGCAGTAACTTGTGGTGCATTGATGGTGGATGCGTTGGAAGTGTGGGACTGGTGTGACAGTGTCCAGTGAATGTCACCGTGGTGTGTTGGTGTCTCAGA             | 4 |
| wt-118560-118680 | 984 | ATAGCAGTGTGGTTATAGGGGCGTAGTGTGGTCAAGGTGCTAGACTGGTGTGCTAGGACCCGATGCCGAGGGTATGGTGTAGTGCACAGCCGTTGTGCTGTACGTTCCCGCC              | 4 |
| wt-118680-118800 | 985 | GAGGGCGTGAAGTGCACATAGATGTCAAATAAGGCTTGTCTACAGATGAGTATCATGGCCATAACAGCGCCTGCTTGTCTTGGCGTGTGCCATCGCGTCTGGACGAGAAAGGCT            | 4 |
| wt-118800-118920 | 986 | CCCGGCTCTTTTATAGCTAGTCTCCACCCCAACTACTACTGAACCATCACATACATGACCTCCTCGAGGTATGCAGGGAATGAGCGGTCCTGAGCCGGTCAACACGACATTGCTTC          | 4 |
| wt-118920-119040 | 987 | CGTTTTATGCCCTCAGCTGCCCTGACCAGTTAGGACCTTGTGCGGATGCTTTAACGGCGCGGTCAGTTGCTACCAATGACGGCCCTAAGGGCAACACATCCTTGAAGCAGGGCGTA          | 4 |
| wt-119040-119160 | 988 | GGAATGGTACCAAACTCGGGGCCACCCATCAAAGACATAATATGTCATAGTGGCAGTGTGATGCATCACCACCACAGCACTCGCCAGGACCCTCTGCATATCTTGTACAAGGCGC           | 4 |
| wt-119160-119280 | 989 | CTTCAACTCGGCCACTGGCTCTGGTGCATTAATGTCTGTTCTTATTAGTACAGCCTGTAGATTGGGCACCCAGACTCAAAAAGTGCAGTACATGAAGGGCAGCCGCTCAAA               | 4 |
| wt-119280-119400 | 990 | CCACCATGACCCCATGCTGTCCGTGTTGTTGGGGTAATAAGTCAACATTGTAATGACCACGGCCGGGATAAGGGTGAACCTTGCAGAATGGATTGGTCCGACACCCATAAGACAGG          | 4 |
| wt-119400-119520 | 991 | GGCACCCCAAAATCAGCCCTTACCCCGAAGCACCTTGGCCCCACCCGGCATAAAGCTGGGCAAAAAGAGTGGTAAAAACCAAGGCGAGTAGGGCCAGGAACGCCAAATAGCAGCAG          | 4 |
| wt-119520-119640 | 992 | TAATAGATAAAAACAAAGCTCAGCATGAAACAGGTGGAGGCTCAGTAGGCTCTGCCCTCCATCATAGACTTCCCTTGAATCTCATTCTCAGCCATACCTCGCTTTCATC                 | 4 |
| wt-119640-119760 | 993 | CAGGAGGGGCGCATGGCTGCCATTCTACAGTTAACGAGGAGAGAGAGTAGTCCGCGGAAATGGTGCCCTCTCTGCCCTCCTGACGAGCCCATGGTGCATCCATCTCCGAGTC              | 4 |
| wt-119760-119880 | 994 | CGTCTTCAGCTTTGGCATTGGTCCGGTCCGGTGGTCTGATTTGATTCTGATCTGGGATTGGTCTTGGTCTCTCTCCCCATTGGCATGGATTGGCATAGGTGGTGTGGCTCA               | 4 |
| wt-119880-120000 | 995 | GGCTCAGGTTCCGGCCCTGGGACGGCAGCAGCCGCGGACGGTGAAGTCTGGAAGGTAGAGGCCCTGCCCTCCGAGGTCTGGGGCCGGAGCCCTTAAAAAGACTTCCACCTCTCC            | 8 |

|                  |      |                                                                                                                           |   |
|------------------|------|---------------------------------------------------------------------------------------------------------------------------|---|
| wt-120000-120120 | 996  | CGGCTGGCCAAGACACGCCGCTCGTGGACCACGCCATCTTCTCCCGGCTGATTGTGTGGCTGACGGTGCCTGTTCACCGCCACTTGTTCATCGACCATGGTACCCCTTTATCTTAA      | 4 |
| wt-120120-120240 | 997  | CCAGCAAGTGGCCGTCAGGGTCTCTTGAGAGTATGCCGCTGTGGCCAAGCAGGCCCAAAATTAATAGTGATGCCAAAGACTGTAGGTAGGTCAATCATCACACGCATGCGTGATAAATC   | 4 |
| wt-120240-120360 | 998  | ATCCGCCACTGACAGGTCATCCAGTCTATCCGGCTATCTCATCCGGCACCATTTCTGGAAGAGATTCAAGAGGTCGTGATGCTCATGCCGATAAAGCCCTCGACCAGGGCCATACT      | 4 |
| wt-120360-120480 | 999  | GGCCCTGGGCAGCAGGGTCAACATGATGCAAAAAGTAGAGACTCAGATTGTCCAGCAGGGCCAAGCCAAGGGGCCCTGGCACCTCCGGGAGGGCCAACCTCGTAGTGGTGCACAGGATGA  | 4 |
| wt-120480-120600 | 1000 | AACAGAGCCAAGATGCATGTGTACATCGAGCATGTCTGCGTTCGCCGGAGCCCTGCATGACAACCCGGGAGTACAGTAAACAGGAGAATCTTTCGACGACCTCCTCTGCTATGGCCGT    | 4 |
| wt-120600-120720 | 1001 | AGGCAGCACCTGGGAAAAAATGTCCACATCTATTGGACTTAACCTACCGTGGCATGCTCTGCCAAAATCCGGGGGCATAACACTGAGGCTCCCGTCCCATGCCATGGAAAA           | 4 |
| wt-120720-120840 | 1002 | GGGCTGTACTTGTCTTAATGGCTAGCTGACTGACCTGAGCAAACTCTGGTGTAGTATAAACTGTCCAGCAGCCAGGGTGAATCAGACAGGTAGTTGTACAT                     | 4 |
| wt-120840-120960 | 1003 | GGACACGTAGTCCGGACCGTCTCTAGAGAGTACACCTGACCCAAGCCAACTCCCTGCACATTCTGCGTCCCGTGAGTGAAGCCAGGGGTAAGATGCAGCCAATCCTCTGTTGCATCTT    | 4 |
| wt-120960-121080 | 1004 | GGCAATCTCATCGGTATACAGACGAGAGGAGAGACACTACCACCTTCAAATCCATCTTTATGACAATATCAAAAAACACCTTATTTCAAACCTTAAATATTCTCGTACCCGGCGC       | 4 |
| wt-121080-121200 | 1005 | CACCTCTCAATATATAGTGTCCGTAATGGATGGGGCGTGGGTCTGTTTGACAGACATAAACTCATCGATGAGTGCCTGGGAGGAGGCTGAGAGTGCCTGGGAATGCCCTCGACAGAA     | 4 |
| wt-121200-121320 | 1006 | GCTGCAGGGCTGCTCCAGAAACACGTCAGTCCAGCACTACTACAACTGCACCTCTGTGTTGCTGGTGGTGGCTCCCAAGTCGCTGGCTGTACTCGTTGACCATGTTGTAGAG          | 4 |
| wt-121320-121440 | 1007 | TCCCTGTTGTTGCGCAGAAAGCTCCTCTGTTGAAAAATGCCCGGAGGGCTGTAGAGCCCGGACGGCCCTCTGGCGATAGGAGGAGTTGTACATGATGTACCCACAGAGAACCCAG       | 4 |
| wt-121440-121560 | 1008 | CTGAGATGCCAGGGATTACAGTGTCTCCGGTATTATAGGGCCATCCGGGCGAGAATGGTCATAGATGAGCCCTCGGCAACCTCCTGATTGTAGTTTTACAGGAGACACACAGGC        | 4 |
| wt-121560-121680 | 1009 | GGCCCGTCCCTTGGAGAGTTGGACTTTGAAAAAAGCCAGCTGTCCGCTGACCGGTGACGATAATCTCACAGTGGCTGCTGGCCGTGGCAGAGTCTCGAGCTCCATTACATT           | 4 |
| wt-121680-121800 | 1010 | AGTCATACCTGCCAGGTATGCTCGGGTCCCGAAGCAGCGTCCCATTTGCGCTGAGCGCCACCTTGGCCTTGATGTAGTCACTGACTTGTGTTGCCAAAGGCCCTCGCCGGAAGAG       | 4 |
| wt-121800-121920 | 1011 | GCTAAAGAAGTCTGGGTGTGGATACCATGTACAGTGTGATGGCCGCCACCTGGCCGGAGTCACTGTCGAGCTATAACTAAGCCCGGTGTCGATGGAGGCCATCTCGTGTGCACCTC      | 4 |
| wt-121920-122040 | 1012 | AAAGGTTACCGCTCCACCCTGGCCTCCCGGGGCTAAACATTTGGGTGCCAATGAACATGATGTTGAGGCCCTGGAGCTAAACAATATGTTTTAGAGAGGATCTCATCGGCTCGAC       | 4 |
| wt-122040-122160 | 1013 | CACGGTCACTGGCCACCCTGGGTGGATCTTGTAGCTGGCCTGGGCAATATAGGCCATGGGGACATCTTGTGTCATGGCGGTCATTCCACTGATTGAAACGAGGGAAGGAAGACATTC     | 4 |
| wt-122160-122280 | 1014 | GGCCGCTATTTGCCATGGGCGAGCGGTGCCACTCCCGTACTCTGCAAGAGCTGCTGTGCCGGTGAAGGCTTCCACGGCCCGTCTGCTGAGGATTGCGCATAACAAGGTGGCAAC        | 4 |
| wt-122280-122400 | 1015 | ATCCTGTTGCATGTTGGCAGCCACTGCGGGTCCCGTAAAACATATGAAAAGGAATGGCGTAAAAGACACTGGGTGACGGCCCGGCTCTCGGAGAAAGCCAAAGGCCACAGCC          | 4 |
| wt-122400-122520 | 1016 | GTTACCAAAAACAGTCTGCTCTGCTCCGCTTGTCCGGGATTCCGGGCGAGTCTGCTGCTAACGTCATTGTCCACCGACACACGCACGGCAGGGTGAAGTGGGGCAGGTCAATGAATGA    | 4 |
| wt-122520-122640 | 1017 | GGCGCTGAGTCCCTGATATGCCACCGGTGGGGCGAGGATCCAGAGATCCCTGAGCGTCCCTTCCAAATTTGTCGAGGATGCTCGTCCCTGGTAAAATGGTGGCT                  | 4 |
| wt-122640-122760 | 1018 | GAAGGCTGCCCGTGTAGGCCAGGGTCTGGGCCACGTGCTGAAAGTCCACCCGAGGCGGCACATGTGGGATTGGTGCAGGTTGGGAGGAAAACCTAGTAAAAGATCTTTTCCAGCAC      | 4 |
| wt-122760-122880 | 1019 | ATCCGATGCCCTCATCTACATAAGGGCTAGGTGCAGACGGAATCGTGGTCTGCTCCGTTAACCCGGTAGCCGTACAAGGCCAAAATGGGCGCCATCTCATCCATGTTTCC            | 4 |
| wt-122880-123000 | 1020 | AACCTCTCAATAAACTGGGGCGCGGCCAGGGTGTGAGCTGAAACCTCATTCCGATAATAAATCTGGGGGCCCGGCTACTAACGGTGAGAAGATTGGGTGAAAATGTCTGTGAGGCCAC    | 4 |
| wt-123000-123120 | 1021 | CGGGGGGAGCAGGTTAGGTTCCAGGAGAGCCGACACATACTGACCCAGCTCTCATCCCCACAACATCTGACCCGGCCAGGGCCATCAGGGCCCTGCTTAGGGCTATAAGTTCCCCATA    | 4 |
| wt-123120-123240 | 1022 | GATTTTCTATACATGGAATAGCCCTCCTTGGAGATGGCTTATTTCCAGTGGCGGACGATGAACCTGATCATGAAAAAGCTGTTCAAAAGGCAAGCCTCCCTGACCGTCCAGTA         | 4 |
| wt-123240-123360 | 1023 | GGTGTGATGCACAGGGACACCAAGGCACGTTTATGACAAAATTTTCCCTCAAACCGTGATCATAGCCCTCGACTACGTAGAAGAAGGCTGGATAGGCGAGTGTCAATAGGCAGTATCCCTG | 4 |
| wt-123360-123480 | 1024 | CACAGTCTCAATAACGGCTGATCCACCAGTGGGCCAGAGATGTGGCGTCTCAAACCTGCTGCCCGGGCTCTTGGAAATGCAGCTGGGGCCAGGGAGTGGCAGGTTACCCACCAT        | 4 |
| wt-123480-123600 | 1025 | TAGCCGGTGCACAGCCCTGTGCTGGCCCTCTCCCGGCATCCCTGCCAATGTAATATCATAAAGGGGGTGCAGCTCCAGCCGACGAGGTCAAAATGGACGGTGGAGGAAGTCTTC        | 4 |
| wt-123600-123720 | 1026 | GGTGGCAGCCCGCACTTGAAGCTATATCTGTACGGGGGCTGCATACTGTTATCATAGAACTCGTCCACAATAACAAGCACCATTATGATTGGCCCTCCTGTGTTGCAGGGAGTA        | 4 |
| wt-123720-123840 | 1027 | GGTCTCGCGCTGTCTCGCGGGCCGGGGCGCGTGTGAGGCTGTTTAGGGTATGGCGGGTGTGGAGTGGGGGTGACAGAGAACCCTGAGAGCATTCTGTAGTTAAACCGGAGGAG         | 4 |
| wt-123840-123960 | 1028 | AAGGTTATCTGTTTACAGTCCATGCCTCCACCGTAGCTGCTGTGGGGTGTCCAGCATTTTGTGCGGGCGGAGGTCGTGTACTTGGATTGGGCATAAACAGGCCACTGGGAA           | 4 |
| wt-123960-124080 | 1029 | ATAGTAGCTGACTGCATTCTCTGTTGAGGGGATGGGGACTGAGTGTATTGTACATCTTTTGCAGGCTTCCACGGCCACCGGCTGGTGGCCAGCTTGTGACGGCGGCTGAGAT          | 4 |
| wt-124080-124200 | 1030 | CGGCACCCGGGGTGTCTCGACCCCTGCGGCCACAGCCGGCAGGTGACAGTGGTGTCTCCGGCTTTTCCGGTGAAGTCCAGATCCTAGCCATGAAATGCTCAAACGTACGCATCAC       | 4 |
| wt-124200-124320 | 1031 | GCGCCGATGCTACGGCAGTGAACAGTCTCCCGCCGTACCACAAAAGAACATAGCTCGAGGGCCCAATCTGGTGTGCGCCCTCCTACCCAGGAAGGTCAAGAGCTGGCCGAG           | 4 |
| wt-124320-124440 | 1032 | AACGTTGTCGGTGACAATAACACCCCCCACTGGCTCTCCCGCTGGCGGTGCTGAGTACTGACCCCTTGGACAGCTCTCCCGGACACGGCCGCTACCATCTCAGAGAGACG            | 4 |
| wt-124440-124560 | 1033 | GCTTCGCACGTAAGAGAAAACCCGGAGCCCATGTTCTCGGCCCGTCCAGGAAGAGGAGTGTCCAGCAGATGCCCTTGAACATGGCAATGAGGTGACAGTGTGACAGTCTGGAGAA       | 4 |
| wt-124560-124680 | 1034 | CCCCCTCAGTGAAGGTGGGATCCGCCAGGGTCTGCAGGATAAACATGGGAGGGGATGGCGAAGCTTCACTACAGGACGGTGTAAATGAGGCCCTCTCCAGGGCATCGACCCAAA        | 4 |
| wt-124680-124800 | 1035 | CTGTAGGGCCGAGGCCACGGTCTTGACAGCCCCAGTACTTGCCTACTGACCCGGGCTCGGGGATACTATGCAGGATCTCCAGATCCAGATGGACAGTTCATTCCGTAATAAT          | 4 |
| wt-124800-124920 | 1036 | GTGGTGTGTTGGCAATTTTGAACCAATGAATGTCGCTGCTGCTGGTCTCCTCCGTCGCGTGAAGTGGTGGGACGGAGATTGCAAAATGAATCTGCCATCCGTCATACG              | 4 |
| wt-124920-125040 | 1037 | ACTCAGGCTTTGAATCCGTTTACACAGGACAGCCAGTGGCTCTCCAGGAAGCGAACATATTGGATGGCGTTCGTGTAGACCCCGAGTAGCACCTAAACTTGTGACCCGCTC           | 4 |
| wt-125040-125160 | 1038 | TCTGGCATCCTTGCACACAGCAGTCAAAGCTATGAAACAACCCCTCAGCCGCTGACTGCCAGGTTGAGAGCAGGTGGGCATCCACCGTCAAGATGGGGAAGGGTGTGTTTTCCAC       | 4 |
| wt-125160-125280 | 1039 | ACCCTCATTGAGGCCATGACACAAGGTAAGAGGGAGATGGGGGAGGCTCGAGGGCTTCTCTTACAGCTGGGTCTTTTACGCCCTGGCCTGCAACCCGAGCCACCCACACTTCC         | 4 |
| wt-125280-125400 | 1040 | CGAGGATGCTACCTTCTAATCAAATGGTTGGACAGGCCCTGGCCAGGGAGGCCACCTTTACCGGTGTCGGGCTATGCGTGGCTTCTACTCGCGTATCCGAATGAATGACTGCCA        | 4 |
| wt-125400-125520 | 1041 | GGAGCTGCCACCCGGTTAATAATTTCTGAGTCCGGGACCCGTCCTGGCCCTTGGAGTCCAGAGTCTGGAGCATAACAGACTGCCAAATATGGTCTCTGCCACCCCTGACCACGCTGC     | 4 |
| wt-125520-125640 | 1042 | CCACCTCCGGTGGCCAGGGTCAATCATAACAGGACTGCCCGGTTCCATAAACACAGGACTCAATGTTTCCGCTTATCATCCGCTACTTGTCTCATCCAAATTTGAGCGCTGCTTCCA     | 4 |
| wt-125640-125760 | 1043 | GCAGTCTTGGCGTGGTCCCGCTGCTACTTCCAGGACTGTAAGCGAACTGCAAGAGTGTGGCTCATCTGAATCAGGTTACCAGGATCCCGCTGCTCCGCTTCCAGCGGGG             | 4 |
| wt-125760-125880 | 1044 | GGAGGCCAGACTCAAGTCCACTTCTCTCTGGAGCACATTGCTGTGATGCCAAACAATGCCACTCCGGAGATCAGGACGAGGGCCGCCCAACCTCACCCACCCACAC                | 4 |
| wt-125880-126000 | 1045 | TCTAGTGATACTGTACCACGCTCTCCGACAGCCCAATTTCTGACACGACGGTGTCTATACCGCTTGTGACCTGTTGCAACTGCACCTGCCCAATATCTCCATCCAGCAGTG           | 4 |
| wt-126000-126120 | 1046 | CAAGCGCGGGACAGACCCGGGACCTGGAGATCACTTACAGAGTAAACGGCGGAGGGAGGCCCGGAGCTTCCAGTCCCCTCCTCCCAACTGGCTCCCTATTGCGATGCATAGTTGC       | 4 |

|                  |      |                                                                                                                          |   |
|------------------|------|--------------------------------------------------------------------------------------------------------------------------|---|
| wt-126120-126240 | 1047 | TGCGTCCCTGCTGCCGGAGGTGTCCTGGGGCACCAGGAGTGTCTCCGCTCGGTCCAGAAGCCAGGGAGGGCAGACGGATGTACAGTCCGGGCCCGGACCCGGCCCGGAGACTGGTGGC   | 8 |
| wt-126240-126360 | 1048 | CCTCTGCGAAGGGGAAGATGGGGCACCTAAAGACCCCTCTGGGACCGTTTGAGACCCCGGGGGCCCGCCCGGCCAAGAGCGAAGACGAGGAGTCTGAGCGTCGAGACGCCCTCC       | 8 |
| wt-126360-126480 | 1049 | ACCCCGCTCGATTCCAGTTCCAAAGCTTCCCGGTTGGTGCCCGTGGGGCCTGGGTTTCGCTGCTCGTGTCAACACCAATCGGGTATCAACACTAAATTTGGTGTCTCAGAGCCCT      | 4 |
| wt-126480-126600 | 1050 | GGTGAAGATGCCGAGTTTGAATGTCCCCCGCTCATCAACAACTTGTAGCCCGCAAGTACGTGGTAAAGAGACGGCGTTCACCGTCACTATTCTTACGGACGGGGTGGGGGCCAA       | 4 |
| wt-126600-126720 | 1051 | CCTAGCCTCAATGTCAATATCAGTGGCACCATCTGAGCTTCTATTGGCCATGACGTCACTCGGGTCTTCCCTGCTGCCTGTGGAGGCTATTTATCCCGCGCCGTGTCAACTGGAAC     | 4 |
| wt-126720-126840 | 1052 | GACTCTAGATCTCCATGGCTGGAAAATCAGAGCCTAGTCAGAGAGAACCAGGCGGGTCTTTTGGACTCCAACCTTTCCCTCGGTGTCTCCCGGGACGGTCTCAACGTGTCTG         | 4 |
| wt-126840-126960 | 1053 | GTTTAAAGCCGCAACTGCCACCATCTCGAGATCGGGCAGAGATTGGAGGACAGCAGCTGATCCCGTGAATCAACCCCATCGTGACGCATCGAGAGGCAAAAATCTACCCGATTA       | 4 |
| wt-126960-127080 | 1054 | CCGGCTCTTACCCTGCTAGAGCTACGCAATCGGAGTCAGATTCAAGTGTGCACAAGCGTTTCTGGAAGGCCTGTAGACTGCGCTCCCTCTGCGCTGGATCCAGCTGTATCAA         | 4 |
| wt-127080-127200 | 1055 | CGAATCGCCTCCGAGGGCTGTTGATTTTCCAAAGAGAAGCATCGCCCACTCCAAAACCGACACGAGTCCGGCTTCTGGGTACAGACATTCGGCGAACGTGACAAAGCTGGTGGT       | 4 |
| wt-127200-127320 | 1056 | AAACGAGCGCAAGACCCGCTGGACATACTGGCCCTAACGCTAACTTTTTAACGAGGTGTAAGCATCAGTTAATCTAAGACAGTCACCTATTTTCTGACCCCTCTGAGGCACATCCG     | 4 |
| wt-127320-127440 | 1057 | CCGAGCTGGGCTGGCCGTGCTTCCGTAACAGAGAGATTACCTTCTCTGGCCACCTGCGCAAAAAGACAGCCCACTCCACTCCGCTGATGCTCAAGTGAAGCAGCCCGGG            | 4 |
| wt-127440-127560 | 1058 | CCCGCTTCAATCAGGGGCCGTACCTGCCATCGGGACAGATTGCTTCCACACCATCCACGCCCACTCTTGCCTCGGGCAGTGGACTGCTGGGAAAAATGACCCATCCGGCCC          | 4 |
| wt-127560-127680 | 1059 | TCTCCGTGCTCGGGCTCAACGTCCTGAGAGCCTACCCATGACCAACATGAGGGCACCGATCATCTCGTGGCTCGCCTCATCTGGCCCCAACCCCTATATCTAGAGGGACAGC         | 4 |
| wt-127680-127800 | 1060 | TGACGGTGGGCATGACACAGGACAACGGCATTCCCGTGTCTTTGCCAGGCGCTGTCAATTGAGGTAAAAAGCGGGCTGAGTCCAACATTAAGCCCTCTCGCACTTATGATAGCAGAAG   | 4 |
| wt-127800-127920 | 1061 | ACTCTGCTGAATCAGATCGCCCTTTTCCGATCAGAGCACCCGCTTCTCCATGTTGAGTCCGTAACACGAGTCCGGGTGATGAGGGAGCAAAACCCCGGCGCACCATCCGGG          | 4 |
| wt-127920-128040 | 1062 | ATATTCTGGAGATCCCGTGTGCTCTCATCCCTGCAACTGTCTCCACCAAGTCCATCTGAAAAGGACCCGGAGCCCACTCCGGAGCCCAAGCCACCTTCGATGCCACCC             | 4 |
| wt-128040-128160 | 1063 | CCATGCCCCGATCTTTTACGACATCGGGCAGAGGTGCCAAGCTGGGCAATGCCCGCCGCGCAGTGCAGCAACGTGCTCATCGCCAACCCCTCCCACAACTCTAAGGCTGGTGC        | 4 |
| wt-128160-128280 | 1064 | CCAATCCGGACTGCTGCTCTCCAGCATTGTACCTCAAGCAGTGTGCTAAAGAGTCTGAATCTGGAGAATATAGTGCAGGACTTTGAGGCCATTTACCTCCCGCTGTATACCA         | 4 |
| wt-128280-128400 | 1065 | TCAGTGAGGCTGAAACCAAGGCTTTGAGAAGCTGGTGGAGCAAGCAAAAACCCGTAGAGAACATAGTCTTTGCTCAACAGCATCTGTCCACCTCTACACTCCAGATGTCTGCC        | 4 |
| wt-128400-128520 | 1066 | CCGATGTCAATAACCCAAACATTAGCCTGCTCTAGAGAAAGTATTTCTCATGTTCCCTCCCTCAGGACCATATAGAAAATGTAGATTCGCCACCCCATCGTCCGGCTCTGTGGCC      | 4 |
| wt-128520-128640 | 1067 | AAGGGGCTGAGCTTGGCACCATGGCACAGTTTCTAGGAAAGTACATCAAGGTCAAGGAAAGAACTGGAATGTACACACTGGTCAAGCTTTATACCTGCTGCGCATCTAAGGAAAAA     | 4 |
| wt-128640-128760 | 1068 | TAAACAATCTGTGAACCGAAGAGATACCAGAGCAAAAGCAATAAAGTACAGGATTTGCCAAAACACGTTGGCTTTTCTCATAACAGCCCGCAATTTCCATGACAGTCCGTTGG        | 4 |
| wt-128760-128880 | 1069 | TGGTCAGCAGCAGATAGTGAACGTGGAGTTGTCAAATCAAAGTGTGGAGCTCAAGATGGAGTTTGGACTTCTGGGAGTGATGTAGTTGTAGTTTCCAGGCCTTCTTTTCAT          | 4 |
| wt-128880-129000 | 1070 | CATAACTGAGCAGGCAAAAGCCACAAAAATGCAGGATTCTGCTGCTGGTAAATTTCTGGATCTTTGGAATCTGGCGGGCTCCCAGCCACAGCACCTCGCAACATTTATTCATTA       | 4 |
| wt-129000-129120 | 1071 | TAAACGGGGGAGAGAAAGAGAGAGCTGCTGAGATAGGTGGTGTGGCTCGTATAGCGCCAGGCTCGGACCTCAGGTCACATAGAGATTATGAATGTACATTTGATGAGCGGGATAATCA   | 4 |
| wt-129120-129240 | 1072 | TCAGAACTTTGTCGAGCCTGTCCACGCATTGTAGGGCGGGAGATGCCACGCATCCCTGCTTCTGCTCCAAAGAGAGCCGCCCAAGAAAACCCATCCACAGCATTGAAACGGCCCGCT    | 4 |
| wt-129240-129360 | 1073 | GGTCCAGCTTGCCCTCTGGGGGCCATGCTCAGCAGCTTGTCTGTTGAGTCAAACTGAGGCTGAGGTAGCAGGTCGAGAAAGAGCCCGCTCTGTGCCAGGGCTAGCCCGCGCA         | 4 |
| wt-129360-129480 | 1074 | AAACCTCCCAATCTCTAGGGCCGAGCACAGGGCGGTGGACAGCAAGTTGGTATAGGGCAAGGTTGGCCCTCGGTAGTCACTGAGTCACTCAGCCGCAACCCAGTGCAGCTGCGCA      | 4 |
| wt-129480-129600 | 1075 | TAAACAGGGTCTCTCATCAGGATGTCAGGGGCTGGAAAAGGGGTGGCGTTGTAGGCCAGAGAAGCACAGATGTGGCGCTCCAATGAGGCCACTGTAACCCCGGCTTGGGGT          | 4 |
| wt-129600-129720 | 1076 | AGCCGACGGTGGCTAACCTCAGCGCTACTCCTGTTTCTCAGTAGTCAAGTACCCAGCTCCTCCATCTGACCGTGGCCATCAGCATGGCGGCCAAGCGCTCCAGCCGTAGGATTGCA     | 4 |
| wt-129720-129840 | 1077 | TGCCCTTGACAGTGGCCCATAAACATATGCCGATGATGTCTTTCAGGACAGTCAAGTCAAGAAAGCTTTGGCCAACCCAGCGGAGTCCACGCAGCCATTGCCAGTCTACCCACAGCAT   | 4 |
| wt-129840-129960 | 1078 | GACCCACCTTAAAGAAGGCCACAGAACTCAAACATGGTAGTCAGCGTTCCGTTCCAGTTCGGCTCCCGGCGAGCTCCCTTATCTCCAGCAGGACAGTTTCTGGAAACGTAGC         | 4 |
| wt-129960-130080 | 1079 | GAGCGTAGCTGGCGGCTGTACTGGTACGGCTCGGGAAAACATATCCCTCAGTGGTACAAAGTATGTTGAAAGTTGGCATAATGCACAAAGGTTGAACAACTACCAGGGAAATAGT      | 4 |
| wt-130080-130200 | 1080 | CCCGCTTTGGGCACTGGTTAAGGATGGTAACTAAAAGGCCCTCAGATCCGGCAGGTCCTTCTGCTTCCAAAGACAGGCTCAACACATGCTCATCTCCCTTCTCGGTCACTCGCT       | 4 |
| wt-130200-130320 | 1081 | TGTAGGTGCCATCAGAAATTAGAAGTCATGGCCCGGTACTGAAACTTGTCCCGTTGATGGACAGGGCCACATAAGACAAGTACAGCGCAGCTGATAAAAGACATAGCTGTGTG        | 4 |
| wt-130320-130440 | 1082 | GCCCGCTGTTGGGACGATGTTGCCAATATAGTAGAAGAGCTGCTTCTCAAGGGGGGCACTAAGCATGACAGGCAAGGAAATCAGCCGCTAATGACTCCGGGATGGACCTTAGATGCAT   | 4 |
| wt-130440-130560 | 1083 | CCACTTGCATGGATCCTTACAGACAGCAGGGATATCGACAGGCTCGGCCAGCGCAATACCAAGGGTACCAGAGCTTGTAAATTAACCTTAGCGGTTAAGCATAGACGCCAAATCTT     | 4 |
| wt-130560-130680 | 1084 | CGGTGACATTTGCCCTCTCCACAGCGCTCTGGCTAAGGCCCTGGGACCTTTGCCATCAGTTCGGTCCATGGGATGGTGAATGCGAAGCATGCCCTCTATGTCCAGTGCAGCTTAA      | 4 |
| wt-130680-130800 | 1085 | CCTCGCTGAGGCTGGCAGCCCCACCTCCCATAGCAACACCAGGCAAAAAACAGAGCAACTGCATCCTAGTCCCGATTCCCTCTCAAATCAGAGATCACCTTGTCTCAGACCAGCC      | 4 |
| wt-130800-130920 | 1086 | CAATGAAAAACTGAGATCGTATTGCCGATTCTTAATGCCTGCATGTAATCTCCGTCCAGCATCCAGGTAATCGTCTGAAACTCTGAGAGGTCACAAGCACAACTGAAGGTAG         | 4 |
| wt-130920-131040 | 1087 | GCTAGCGTTCCGGTGAACGCAAGACAACTTCAAACAACCCGCTCGGCTCGGAAAGGCTGTATGACTTCCCTAAGTACACTAAAGATGCTGTTTATACAGCTTCTCGGCCACACCA      | 4 |
| wt-131040-131160 | 1088 | CTTCGAATTTAGGGGTGTGGCTTTGATGACATACTGCTGATTGTTGTTAGACCGGCACATACCTTCAAAATGTCTCCGGGGGCAAAATACTGTTTAGGAGCCAGGCACAGTAAACG     | 4 |
| wt-131160-131280 | 1089 | CGGTGATGATCGATCGTGGACACTCTCCAGTAGCCAGCATCCAGTCCCTGACTCATGTTTCCCTCCGCTTTCAGGGCGGCATGTTCTCCCTCCAGCTTTAACTTCAATCCAGACTATG   | 4 |
| wt-131280-131400 | 1090 | GTGTCGCCCGGCTGCTCGGTAACCTGGCCAAAACCTGAATAAAGTCACTATAGGAGAGAAGCTGGCTCCGGAGCAGCATTAGAGGGAAAAACCCAGGAGCCGACAGCAAAATGGCGATCA | 4 |
| wt-131400-131520 | 1091 | TGCAAAATCCAAACATCCAGGGGCGGACTGACCTGGCACCAGACTCGGTAACAGCAAGCTCCGCTTCTAGAGGCCAAGACTCTGAAAGGGGTGGTAAATTTTATCTGGCATGCTAAA    | 4 |
| wt-131520-131640 | 1092 | ACCTCAGCCGAGCTGCTTCCCTCCATGCCCTCGCCGAGTCACTTCTGTGCATGGCCTTAATGGCATTTCATACACATGAGTCCAGTACCGCATCGGTTACAGGACTACAATGGTC      | 4 |
| wt-131640-131760 | 1093 | AGGTCGCCAAAGACGCTTCAAATGATTGACATAGTAGTCTTCCCAACCCAGGGCACCTTCCAAAATAGCAAGCAGGCGAGTTGATTTACTGATGATGATTTGTTAGGTGGGTC        | 4 |
| wt-131760-131880 | 1094 | ACAATTTGAAACCCGATGCTCTCTTCTGAGCCTTGGCTGGCGGGTCTTGGGCATCCAGATCCAGAACTTCAACACTTCCACTTAGCCGCTTACGCTGGGAGCATGC               | 4 |
| wt-131880-132000 | 1095 | TTGGATAACTTAACTGCGCCCACTGGCGGCCAGGTGTTGCAAGGACCAAGAGCTTACCTTGGCCACATCTTTTGTAAACCGGGAATGAGAAGAGGCGCTCGCGAAATTA            | 4 |
| wt-132000-132120 | 1096 | GACTCATCTCAGACTCACAGTCAGATTGTATCGAGCCAAAGCCGGCCAGGCCCTCTCAAAGCCTTCTGGTACATGAAGTCCGGCTGTTGGAGTCCGCACCTCTTCTGTGCAC         | 4 |
| wt-132120-132240 | 1097 | GAAGTTTTGCGGAACAGGAGAAGGGGTGCGCTTGTCTGGGGCCACACTCCCGGCTACGGGCTTCCGGGTAGGGGCAAGTGGCTTTTGGTGTGCGGGTGTGGTGGCTGGGCTCC        | 8 |



|                  |      |                                                                                                                             |   |
|------------------|------|-----------------------------------------------------------------------------------------------------------------------------|---|
| wt-132240-132360 | 1098 | CTGGGACGGTAAAGGGGACGATGTGCGCGGTACCCGGAGAGTTTCCAGTATTAGATGTACCGCAGCCTGGGTCCGGCACGGCACCCCTCTCCCAGACAGTCCGGTCCGAGCCATC         | 4 |
| wt-132360-132480 | 1099 | AAGGGGGGCCAGTGGGTGGGACCTGGTAGAGGCCGTGCTCATCTTCTCACCTGCCCTGAGTCACTACCGGTGGGGTAAGAACTGAGGGGGCAAAGTCACTCAATCTCAGCGTAAAG        | 4 |
| wt-132480-132600 | 1100 | TTTTCGTGTCTTTCGTTTTTCAGGGGACTCATCTCTGACATTTTCCGACGCGCCGGGGGGCCGGCTCTTCTCGAAATCCAGCCATGGATCCCACCCGGGTCTGTGTCCCTC             | 4 |
| wt-132600-132720 | 1101 | TCCACACACGACCTGGCAAAATTTACAGACTTCCCGCGCTAGAAAGGCGGACAGTAAAGCAGCGCACCTTCGGTGTACTCCAAGCTGCTCTCTTAAAGACTGGGAGCAACTGGCC         | 4 |
| wt-132720-132840 | 1102 | TCTTTTTGTCTCTGCCCCCGGACCCAGTTTACAGACTTTAGACTATTTTTTGAAGTACCCCTGGGTCCGGAGAATCGCAGATTGGTGTGGTAGCTCTGCAGCCTTATCCCCGGTGT        | 4 |
| wt-132840-132960 | 1103 | TATATTGTAGAATTAAGACGGCCATGAGCAACCGCAACCGTAAAGCTTCCGAACTCGAAGGCACAGAGCTAGAGGGCCAGCCAGTTGTGTACTGTGCCAATTTCTTCGCACG            | 4 |
| wt-132960-133080 | 1104 | CTGTCCCGCCGCTGCTGGGAGTCAAGGCTGGAGCTTTCGAGCTTTCGCGCGCTTGGTATTAAAAACCGAGCTTCCGAGAACTCCAGAGTAAAGTTTCCAGCCCTGGGCCAAAAGCCCTC     | 4 |
| wt-133080-133200 | 1105 | CCCACCTCCACCACCGGCTGCTAAACCTCTCTCCCGTGGCAGGATGGCGCTCTCCGGGCAGCTTTGATAGACCCCGCCGACTGCCAGGGACACAGGCCCGAACTCATGTGGGC           | 8 |
| wt-133200-133320 | 1106 | CCAAAGCCTTCGAACTCACTGCGCGTGTCCCGCAAGCGCTCGAGCTGGCAGAGCGGGAGGCCAAAAGGGCCAGGTCGGAGCGGTGGGACAGGTGTGCCAGGTGCTCAAAAATAGGCT       | 8 |
| wt-133440-133560 | 1108 | CCCCTCCACGGGAGGGCGCTCTGCGCCAGCCCCGCCCTCCCATCCACAGCCAGCCGTTCACTCGGCTCACCGGAAACGCCAGTATGCAGTCTCAATCTCTCCCACGGACCCCTCT         | 8 |
| wt-133560-133680 | 1109 | GATGGTGGCCGACGCTGGCTCAACGCTGCTTGGTAATCTGTACGGAAACATAACCCAGTGGGTACCGTCTTCGGACCTGGTACAGGACCATGTCGGCTAATGCCATGCAGCGGG          | 4 |
| wt-133680-133800 | 1110 | CGTGTTCCTAAGCAGCTGAGGGGCAACCTTAACTTAACTCCGCTCCCTAAAGCTGATGACAGAAAGTGGTGGCGGTGCTTGGGGCACCACTCCAGGACTTTTCTCAGACGCTCAG         | 4 |
| wt-133800-133920 | 1111 | GCACCTGCCAGACCTCCAGGCTGCCCTGATCCTCTCGTGGCCTACCTGCTACTCCAGGGGGCTCTCACACCAGCAGCGCCCTCCCTGCCCTCACGGGAAGAGCTGCTGGAGCTGGG        | 8 |
| wt-133920-134040 | 1112 | CCGGGAGAGCCTAGAGAAAATCATCGCGACCTCAAGGCCAAGTCAACCGGCGGAAATTTATGATTTTAAACAAGCGGAAACAAGGAAGCGCCAGTCAATAGCCCTCTCAACCGACA        | 4 |
| wt-134040-134160 | 1113 | GGCGGCATATCCACCCTGGCACATTCGCGGACAATAAGATTTACAACCTGTTTGTGGAGCGGGACTACTGCCACGACGGCCGCGCTGAACGTGCCCGGGCGGGCGGTCCGGACCGGGA      | 8 |
| wt-134160-134280 | 1114 | CCTGGTGTACCGGATCGCAACACAGATCTTTGGGGAGGATGTGCCCCCTTCTCATCTCACAGTGAACCTGCGCTAGGTTTAGCCGCACTCGAGGCCCTGATGCTCGTCTACACGCT        | 4 |
| wt-134280-134400 | 1115 | CTGCGAGACCGCAACCTGGCCGAGGCGGCCACCCGGCGTCTACACCTATGCTCCCTGCTCCCCAGGCAATGACAGCGGCAAGCCTGCCATGGCGTACGCTGGTATGCCGGCGCCTA        | 8 |
| wt-134400-134520 | 1116 | TCCAGTCCAGACGCTTTCCGCCACGGGAGCTCTTCCGCTCATCTGGGCCACTACGTGAGGCCACGGTGGCGCAGACCCCAAGCCCTCCATCAGCTCTCTTTCCCGGGGCTGGT           | 8 |
| wt-134520-134640 | 1117 | TTTGTGGCCCTGGAGCTGAAGTTGATGGATGGGACGGTCCCTCCATTATGCCATAAACTGACCGGACAAAAGTTTACACCCCTTTGAGATTATCAACCAGAAGCTTTTATTTC           | 4 |
| wt-134640-134760 | 1118 | CGACCCGGCTGCCATGCTGGCGCGCGCACACAGCTGCGCTACGCTTCGAGGACGGCGTGGTGTGCCCTGGGGCGCCCTCGCCCATGCTTGGCGCGGGGAGATCCTGGAGCGTCA          | 8 |
| wt-134760-134880 | 1119 | GTTCTCAGCCTCGGATGACTACGACCGCTGACTTCTCTGACGCTGGGCTACCTGGCCTCCCGGTGGCCCAAGCTGAGCCAGTTCCTCGCACTGGAGTGGGTCAATGGCAAAAAGGTA       | 4 |
| wt-134880-135000 | 1120 | AATAAATCATCGCACGGGGTTTTGCGCTTCTGCTCTTGTGTTGGGTAGGGGAGTAAACCGGCTGACGGCCGATGCTCAGGGCCAGGGCGTCCAGAGGCCCTGATGCTGTG              | 4 |
| wt-135120-135240 | 1122 | AAGGCAGTAGAGGACACCCACCAGCGGTTAGGGAGGACTGCAAGGTTGAAGAGCAGATTTCCGTACGCCAGGGTACCTGGCTCAGGTCCGGCGCCTGCGCAGTCCAAGCTG             | 4 |
| wt-135240-135360 | 1123 | CGCCACACATGCACAGACGGCCCTGTGACATCAGCGCGTATGCAAAAACAGACAAGAGACCGTGGCGGTTACGGGGCGCAGGGCCTCTGCCGGGAAGCCACCAGGGCCAG              | 8 |
| wt-135360-135480 | 1124 | GGCCCGGTAAGCAGGTACCAGTATTCATCCGGCACCTTGCCTGCCAACACACGATTCGTGCGGTTCCAGTATTTATCACGGCTCCCGCCACAGGTAAGGTTAACACTTAGGGTCAG        | 4 |
| wt-135480-135600 | 1125 | CAGCTGGTACAGGATAGGTGCAAAAACCTGAGCTCGTCTCGCCAGAGCGCAAGCGCCAGTCTTTAGCATCTCAGGAGGAGCCCGTGAATCCCAGGTGTCATTCGCGCGTCTC            | 4 |
| wt-135600-135720 | 1126 | CCCGGCACCCAGTCCCATTAACATAGCGGGACAATGGTGCAGGACCGCTGTATACGCTGCGGCTTGTGGAGCGCCCGGACGCCCAAGGACCGCTGCCTCACTGGA                   | 8 |
| wt-135720-135840 | 1127 | TCCCCTACCCGTCAGAGCCAGCTCCCTCTGAAGAAAGCCCTTGCACCTACAGGCTGCAACCTGCCGATGCCGATGCTCCGGTCCGCTCAGTCTTTGGCCTTTACCAGACCCGAGCGGGTCTCT | 4 |
| wt-135840-135960 | 1128 | TAGCGCAGCCTCGATTACCTCTGGGACTTCTGTCCCTGCTGGACTCAATTTACCACGATTGCGATATTGCACAGAGTACGCGCTGCCCTCCCTCGAGAACCAGGTGGAGGCTCT          | 4 |
| wt-135960-136080 | 1129 | GCACGCTGGCTCCCTCACTGTCACTGGCCTCCCTCCACCAGACATACCCCAAAACCACCGAGATGGAGGCAAGCTGTCTTCTTACCACGCTGTCTATCTGTGCCCTGGGTGCTCG         | 4 |
| wt-136080-136200 | 1130 | GCGCGCACCCACGGCAGTCTACGGTACAGACCTTGGTGGGCTCTGAAGCAGTTTGTGACCTGGAACCGTCTATCGCCGCCAGATTGAGAATGACGCCAATGCCGCAAGCGTGAAT         | 4 |
| wt-136200-136320 | 1131 | CGGATGCCCGAAGACCACCTCTGCCCTCACGAAGCTCATAGCTAAGGCAATCGATGCTGGATTTCTGAGAAACCGCTGGAGACTCTGAGGCAGGACAGGGGTGGCAATATCCC           | 4 |
| wt-136320-136440 | 1132 | AGCCGAGTCTGATTTAAAGGCCAGCGACGCCCGGACCTACAAAAGCCGGACAAGGCATCTCAGAGCCACCCAGCCCTCCACAGACCCAGCCACCATGCTATCAGGTAACGACGGAGA       | 4 |
| wt-136440-136560 | 1133 | AGGAGCAACAGCCTGCGGAGGTTCCGGCCCGCGGGCCAGGACCTCATCAGCGTCCCGGCAACACCTTTATGACACTGCTTCAGACCAACCTGGACAACAACCCGCGGAGGACAGCC        | 4 |
| wt-136560-136680 | 1134 | GCTACCTACGCGGCCCGCTGCCCCCTTTCCACCAGGCAATAGCCACCGCGCTTCTACGGTCTGGGGCCGAGCGGTCGCCCGGCGGGGCTACTTTACCTCCCAGGAGG                 | 8 |
| wt-136680-136800 | 1135 | TACTACCGCGGCCCGCGGGCGGGACCCGGGTGCCCTTCTGGCGATGAGCGCTCACACCTACACCCCAACCCACACCCCTCCGGCTACTTTGGCTTGGCGGGCTCTTTGGCC             | 8 |
| wt-136800-136920 | 1136 | CCCTCACCCGTGCTCTTACTACGGATCCCACTTGGGGCAGACTACGTCGCCGCTCCCTCGCGATCCAACAAGCGGAAAGAGACCCCGAGGAGGATGAAGAAGCGGGGGGCTATT          | 4 |
| wt-136920-137040 | 1137 | CCCGGGGAGGACGCCACCCCTACCAGCAAGGACATAGCGGGCCCTTCCAAGAGTGTGAATGAGTTACAGCACACGCTACAGGCCCTGCGCCGGGAGACGCTGTCTACGCCACACCCG       | 8 |
| wt-137040-137160 | 1138 | AGTCGGATACTGCCCCAGCAGGGCCCTGCTACACCCACTCGGGCCCTACGGATTTACGCTCATCAAAGCTACGAAGTCCAGATACGTCCTCATCCGCCCCACCACCACTTC             | 4 |
| wt-137160-137280 | 1139 | TCACCAGGAGCTCAGGCGCAGCTCCACCCCGGGCACACAGGCCCCGAAGCCACTGTGTGGCCGAGTCCAGATCCCTGAGGCGGGAGCAGCGGGAACTTGGACCCCGGAGGA             | 8 |
| wt-137400-137520 | 1141 | AGCCACCTCAAGTCCATCTTTTGCAGGAATTGCTGAATAAACCGGTGGCTTGAAGTAAACTTTATTTGCGTGTAGTACCTGTCATTACAGGGGATCCAGCCCTTGCAGCCCTC           | 4 |
| wt-137520-137640 | 1142 | CCCCAGCCCGCCAGCCACCCAGACAGGAGATGATAATGATGAGGAGCAGCCGAGCCACACAGCAAGTATTAGGAGCAGGGCCAGTGCACCCAGTGGTCTTAGGGCCAGGGA             | 4 |
| wt-137640-137760 | 1143 | TCGATTGAAAAGGGCCAGGGTCACTGGCTTATGCGTGGGACGTTTGAAGAACAGGCCGCTATGGGCCCTGTACTGGTCTTGTGGTGGGAGACTATGGTGGGGCTATGGTA              | 4 |
| wt-137760-137880 | 1144 | GTGGTGGGATAACAGTAAGATGCATACGCTGAGTGAGGGTCCGGTGGCATGGTATTGGTGTCTTCTCCCTGCAGAGTAATTGCAAGTGGACCCCGAGGGCCACTGCAATTTCTC          | 4 |
| wt-137880-138000 | 1145 | AGTGTACATTGCACGTGTAGTAACCTGCATGCGCAAGGGTACATTGGGGATTATCAGAGAGACGGAGGTGTGGAGTCAATACCATTCTAGGGTAAGGCTATAATTGTAACCCCG          | 4 |
| wt-138000-138120 | 1146 | TTAGTTATATGAGTCCGTTGTTGGAAGTAGCTACGGCAAGGGCAGTTGTCATCCCGGGGAGTGTATCCCGGCCCAACTCGATCCGAGAGACCGACTATTGCTAGGAACGCTGCAG         | 4 |
| wt-138120-138240 | 1147 | GTGAGATCACTAGCACCTGCATGGCGGTGACATTTCAAATTTAACCAGTCTGAGAAAAATGCACAAACAGACCCACACAGCAGCAATAAGAACACTAAATGAGTCTTCCCT             | 4 |
| wt-138240-138360 | 1148 | AAACTGCAGTTTTAAACTCCCTGCTTCTCAGCCCTAAATGTGGTGGGTGCTGTAGGATCACTTTGATTTCTGCAACAACAGCCATACCCGGAAGGAGGAGTCCGCGTCCAT             | 4 |
| wt-138360-138480 | 1149 | TTTTCAAGCTAAACCAGAGTGGCAGCAGGCCAAGAAGCTCCTCAGCAACATGGAGACCTCGAAGGAAACTGCGAGGAGTACAGTACGCAAGTACGCTTCTCATGTGAG                | 4 |
| wt-138480-138600 | 1150 | GTAAGAGATCGCTAAAAATGGGATCAGGGTATGTAACCCAGTTTTGCGGGGATGGTGAAGCAGACCGCGGGTGGGGGAAGGAGCTGACACGATTGATAGAAAAGGGCCAAAATAC         | 4 |
| wt-138600-138720 | 1151 | ACCAGCTATAAGGAATTGCTCAGGCCAAAGTTGTTCTCAGGTGGCTTAGGCCAATGTAGGCAATTGCGTGCCTAGAACATTGCTAATGTCCCTGGGTTCTGCCTCATGCAAA            | 4 |

|                  |      |                                                                                                                                  |    |
|------------------|------|----------------------------------------------------------------------------------------------------------------------------------|----|
| wt-138720-138840 | 1152 | ATTCTACTCCCCGGCCTGGTGCAAAATGCTGCCTCAGAACTAACAGCTAATCCAAGCTAACATTCTATCAGTAAACGGGGGAGAAAATGATAAGGACCGGGAGTTTGGCCCTCC               | 4  |
| wt-138840-138960 | 1153 | GCGGTGTCCGGTGGTCTCACAGTGCCTCCCCGGGGCGATGGCTGAGGCCCGGAATATGCAAGTGCATCTTTCTAACAGTAGGGGCTCCACCTAGGTGCTTTGTAATCTTTAG                 | 4  |
| wt-138960-139080 | 1154 | TGGAACTAGTGGGAGTGTGTGCCTGGGTACCCCTATCCTATAGTCTACCGGAGTCTCTTGTCTTGATAATCCCTGTAACACACACCACCTAAGAACAAGGCATTGTTAACCTTT               | 4  |
| wt-139080-139200 | 1155 | GGTGAACCTAGTGTAGTGTGTGCTGTAATAAGTGTCCAGCGCACCCTAGTCAACAGGTGTACCGGAGGCTACTTGCCTCAGTGCCACTTTTACCTTCTCAAATCTATACGGGG                | 4  |
| wt-139200-139320 | 1156 | GGGGGGGGCTGTGAACATTTGGTGGGAGCTGATGCTGCTGGTGTGCTGTAATAAGTGCCTAGCACATCACGTAGGCACCAGGTGTACCAGGGCTACTTGCCTCGGCATCTCCCTAC             | 4  |
| wt-139320-139440 | 1157 | CGGAGAAGGGTTAAACAAACCGTGGGGGTCTAGTGGAACTGAGTGCAGTGTGAATACAGTCTTCAATACAGGCTTCCATAGCACCGCTATCCACTATGCTCGCCGGGCTATATGCTCCCTACCTCCCT | 4  |
| wt-139440-139560 | 1158 | ATATAGTCAAGCCACCCGAACTGATGTAGAAATTAATTTATGATCACTCAAGGCCAAGCTTCAATCTGTGCCGCTGGAGGGAAACATGACCACTGAACTGTTAACCCAGTCAAGTGG            | 4  |
| wt-139560-139680 | 1159 | TTTTGTTTCTTGATAGAGACACAAGGACTGCCAGCCCATTTGGGAGGGGGGGTGGTACGGGAGAGTTGGGCTCGTTAAACAAAGTCTCATCTGATGCTGTGGCACCTCAAGGT                | 4  |
| wt-139680-139800 | 1160 | GAATATAGCTGCCATCGACGTATCGCTGAAACCGGTGGGGCGCTGTTCACTAAAGTGAGCGAAGGTGTGACGCCGCAAGGTCCTTTACCAGGCTTTCAGGTGTGGAATTTAGAT               | 4  |
| wt-139800-139920 | 1161 | AGAGTGGGTGTGTGCTTTGTTTAAATACACCAAGATCACACCCTCTATCCATATCCACAATTGATAAACCTCCGCATGTCCAACCACACGTTGAACAGGATGTGGCACCTAAGAG              | 4  |
| wt-139920-140040 | 1162 | GACCGAGCATACAAGTTATTACCCAGTCTTGTATGCTGGTGTCCCTTAGTGGGACGACGCTAGTATGATCATTTACACTAAAGCAGTGACCTTGTGGTACTTTAAGGTTG                   | 4  |
| wt-140040-140160 | 1163 | GTCCAATCCATAGGCTTTTTTTGTGAAACCCGGGATCGGACTAGCCTTAGAGTAACTCAAGGCCAAGCTTCAATCTGTGCCGCTGGAGGGAAACATGACCACTGAACTGTTAACCCAGTCAAGTGG   | 4  |
| wt-140160-140280 | 1164 | GCAGCTTATAGTGGCAAGGAACTTGGGTTTCAGGCATAGAAAGCCTGGCTCACTATAGCAGCCCATGTTTGTCCAGGGTGGGGGAAAGGCACGTGCCCTTAGAAAATAGTGTGCAAA            | 4  |
| wt-140280-140400 | 1165 | AATTCTATTGTGTGGGAGAGCCTTATATCTAAAGGCCCTTCTCACAATACAAATGTTACTAAGCTGTCCCTCGAGACCTGCTATGTGGCTAGACGTATGGCCTACCCAAGAGCT               | 4  |
| wt-140400-140520 | 1166 | TGGGGTCTCGGGTAGGCCATGATCTTCCAGGCATAGGTTACAAACAGTCACTGCTATCAAGCTACTCAGTTCCCAACGCAGCACATACCCCGCCCTCTCCTGCCATGAGGACTTAT             | 4  |
| wt-140520-140640 | 1167 | GGCAGTGTACTGTTCTGCTTTACTCTTGGACCAGGCTGTATTCTATCAGAATAACAGGGGAAGCAAGGCCCTGCTTCAGCGGGACAGCTGTTTCTAGAATCTCGGAGCCAATAA               | 4  |
| wt-140640-140760 | 1168 | CTACCTGCCCTTAATCTGTATGCTGCATGAAAAACACATACACGTGATGTAAGTTTAGCCAGTTTATTGTTACACCAATGCCCGGAAAGTCCCCCTGTCCTTTGGGTCTCAGGA               | 4  |
| wt-140760-140880 | 1169 | CCCAGCCCTGGAGCTCGGGGGCGCGGGTGGCCACCAGGTCGCTGGTCCGCTGCCCGCTCCGGCGGGGGTGGCCGGCTGCAGCCGGTCCGGGGTCCGGCCCTGGAGCTCGGG                  | 12 |
| wt-140880-141000 | 1170 | GGGGGGGGGGTGGCCACCAGGTCGCTGGTCCGCTGCCCGCTCCGGCGGGGGTGGCCGGCTGCAGCCGGTCCGGGGTCCGGCCCTGGAGCTCGGGGGGGGGCCGGTGGCCCA                  | 12 |
| wt-141000-141120 | 1171 | CCGGGTCCGCTGGTCCGCTGCCCGCTCCGGCGGGGGTGGCCGGCTGCAGCCGGTCCGGGGTCCGGCCCTGGAGCTCGGGGGGGGGCCGGTGGCCACCAGGTCGCTGGGTCCG                 | 12 |
| wt-141120-141240 | 1172 | CTGCCCGCTCCGGCGGGGGTGGCCGGCTGCAGCCGGTCCGGGGTCCGGCCCTGGAGCTCGGGGGGGGGCCGGTGGCCACCAGGTCGCTGGGTCCGCTGCCCGCTCCGGCGGG                 | 12 |
| wt-141240-141360 | 1173 | GGGTGGCCGGTGCAGCCGGTCCGGGTTCCGGCCCTGGAGCTCGGGGGGGGGCCGGTGGCCACCAGGTCGCTGGGTCCGCTGCCCGCTCCGGCGGGGGTGGCCGGTCCGGGGTCCGGCC           | 12 |
| wt-141360-141480 | 1174 | GGTCCGGGGTCCGGCCCTGGAGCTCGGGGGGGGGCCGGTGGCCACCAGGTCGCTGGTCCGCTGCCCGCTCCGGCGGGGGTGGCCGGTGCAGCCGGTCCGGGGTCCGGCC                    | 12 |
| wt-141480-141600 | 1175 | CTGGAGCTCGGGGGGGGGCCGGTGGCCACCAGGTCGCTGGTCCGCTGCCCGCTCCGGCGGGGGTGGCCGGTGCAGCCGGTCCGGGGTCCGGCCCTGGAGCTCGGGGGGGGG                  | 12 |
| wt-141600-141720 | 1176 | CCGGGTGGCCACCAGGTCGCTGGTCCGCTGCCCGCTCCGGCGGGGGTGGCCGGTGCAGCCGGTCCGGGGTCCGGCCCTGGAGCTCGGGGGGGGGCCGGTGGCCACCAGGTC                  | 12 |
| wt-141720-141840 | 1177 | CCGCTGGGTCCGCTGCCCGCTCCGGCGGGGGTGGCCGGTGCAGCCGGTCCGGGGTCCGGCCCTGGAGCTCGGGGGGGGGCCGGTGGCCACCAGGTCGCTGGGTCCGCTGCCCGCT              | 12 |
| wt-141840-141960 | 1178 | CGCTCCGGGGGGGGTGGCCGGTGCAGCCGGTCCGGGGTCCGGCCCTGGAGCTCGGGGGGGGGCCGGTGGCCACCAGGTCGCTGGGTCCGCTGCCCGCTCCGGCGGGGGTGG                  | 12 |
| wt-141960-142080 | 1179 | CCGGCTGCAGCCGGTCCGGGGTCCGGCCCTGGAGCTCGGGGGGGGGCCGGTGGCCACCAGGTCGCTGGGTCCGCTGCCCGCTCCGGCGGGGGTGGCCGGTCCGGGGTCCGGCC                | 12 |
| wt-142080-142200 | 1180 | GGGGTCCGGCCCTGGAGCTCGGGGGGGGGCCGGTGGCCACCAGGTCGCTGGTCCGCTGCCCGCTCCGGCGGGGGTGGCCGGTGCAGCCGGTCCGGGGTCCGGCCCTGGAG                   | 12 |
| wt-142200-142320 | 1181 | CTCGGGGGGGGGCCGGTGGCCACCAGGTCGCTGGTCCGCTGCCCGCTCCGGCGGGGGTGGCCGGTGCAGCCGGTCCGGGGTCCGGCCCTGGAGCTCGGGGGGGGGCCGGT                   | 12 |
| wt-142320-142440 | 1182 | GGCCACCAGGTCGCTGGTCCGCTGCCCGCTCCGGCGGGGGTGGCCGGTGCAGCCGGTCCGGGGTCCGGCCCTGGAGCTCGGGGGGGGGCCGGTGGCCACCAGGTCGCTGG                   | 12 |
| wt-142440-142560 | 1183 | GGTCCGCTGCCCGCTCCGGCGGGGGTGGCCGGTGCAGCCGGTCCGGGGTCCGGCCCTGGAGCTCGGGGGGGGGCCGGTGGCCACCAGGTCGCTGGTCCGCTGCCCGCTCC                   | 12 |
| wt-142560-142680 | 1184 | GGCGGGGGTGGCCGGTGCAGCCGGTCCGGGGTCCGGCCCTGGAGCTCGGGGGGGGGCCGGTGGCCACCAGGTCGCTGGGTCCGCTGCCCGCTCCGGCGGGGGTGGCCGGT                   | 12 |
| wt-142680-142800 | 1185 | GCAGCCGGTCCGGGGTCCGGCCCTGGAGCTCGGGGGGGGGCCGGTGGCCACCAGGTCGCTGGTCCGCTGCCCGCTCCGGCGGGGGTGGCCGGTGCAGCCGGTCCGGGGT                    | 12 |
| wt-142800-142920 | 1186 | CCGGCCCTGGAGCTCGGGGGGGGGCCGGTGGCCACCAGGTCGCTGGTCCGCTGCCCGCTCCGGCGGGGGTGGCCGGTGCAGCCGGTCCGGGGTCCGGCCCTGGAGCTCGGG                  | 12 |
| wt-142920-143040 | 1187 | GGCGGGGGGGTGGCCACCAGGTCGCTGGTCCGCTGCCCGCTCCGGCGGGGGTGGCCGGTGCAGCCGGTCCGGGGTCCGGCCCTGGAGCTCGGGGGGGGGCCGGTGGCCCA                   | 12 |
| wt-143040-143160 | 1188 | CCGGTCCGCTGGTCCGCTGCCCGCTCCGGCGGGGGTGGCCGGTGCAGCCGGTCCGGGGTCCGGCCCTGGAGCTCGGGGGGGGGCCGGTGGCCACCAGGTCGCTGGTCCG                    | 12 |
| wt-143160-143280 | 1189 | CTGCCCGCTCCGGCGGGGGTGGCCGGTGCAGCCGGTCCGGGGTCCGGCCCTGGAGCTCGGGGGGGGGCCGGTGGCCACCAGGTCGCTGGGTCCGCTGCCCGCTCCGGCGGG                  | 12 |
| wt-143280-143400 | 1190 | GATGGGGTGCCTCCAGGCCGACCTGGTGCAGGCAGGACCCCGCCACCCTTATGGGGGGGAGGCCCGCAAGGACCGGGGGGGTGGCCGGTGCAGCCGGTCCGGGGT                        | 12 |
| wt-143400-143520 | 1191 | GCGTCTGGAGCAGCTGGGAGCCGGCCAGCTGCCTTCTTTATCCTCTTTTGGGGTCTGTGTGAATACCTTAAGGTTTGTCTCAGGAGTGGGGGGCTTCTCATTGGTTAATTCAGG               | 4  |
| wt-143520-143640 | 1192 | TGTGTGATTTAGCCGTTGGTTACATTAAGGTGTGTAACAGGTTGGTGGTACCTGGAAGTCACTTATTGGGATAACGAGAGGAGGAGGGGCTAGAGGCCCGCGAGATTTGGGGTAG              | 4  |
| wt-143640-143760 | 1193 | GCGGAGCCTCAGGAGGTCCTCCATAGGTTGAACAGGAGGGGGAGGATCGGGCTCCGCCCGATACCTAGTGGTGGAGCCTAGAGTGGTATCCATAGGTTCCATTATCCT                     | 4  |
| wt-143760-143880 | 1194 | GGAGGTATCCTAAGCTCCGCCCTATACACAGTGGTGGAGCTAGGTAGGATTCAGTAGGTTCCAGTGGGTACCCCTACCCTACCTAAGGTGGCCACCCTTCCCTCCCG                      | 4  |
| wt-143880-144000 | 1195 | TTTTAATGGTGAATAAACCTATAGGTTTAAACCTAGTGGTGAATAGGTTATTGCAGCTGGGTATATACCTATAGGTATATAGAACCTAGAGGAAGGAAACCTATAGTGAATCCCTC             | 4  |
| wt-144000-144120 | 1196 | CCCCCTACCCCTCCCTTACGGTTGCTGAGCCATCCCCACCCAGCACCCCGGGTGGAGTGGCACCCCGCTGCCTTACTGACTTGTACCTTTGCACATTTGGTCAGCTG                      | 8  |
| wt-144120-144240 | 1197 | ACCGATGCTCGCACTTCTGGGTGATGACCTGGCTGTGCCTTGTCCATGGACAATGTCCCTCAGCGTGGTGGCTGCCTTTGGGATGCATCACTTTGAGCCACTAAGCCCCGTTGC               | 4  |
| wt-144240-144360 | 1198 | TGCCTTGCCTGCCTACCATGACACTAAGCCCTGCTAATCCATGAGCCCTCCCTTTAGGAAGCACACGCTCCCGGGGACGGAAGCTGGATTTGGCCAGTCTTCAATTTGGGGAG                | 4  |
| wt-144360-144480 | 1199 | TGGTTTTGTGAGCCGGAAGTTGGCAATGGGTGAGGTGGCTGGCTGTTAAGCTGACGACTTCCCAAGCTTCCAGCTGGTACACAGTGGGGGGGACCCCTCAACTTTGGCTGT                  | 4  |
| wt-144480-144600 | 1200 | GGCCTTATTTCCCTCCCTTCTAGCCAGGCGATGTTCTGCATGTCTACTTGCCTCCTGTGGTGGCAGAGCTTGGCCCTGGGCCCAACCCCGCTTGGAGCCTGTAGGGGCCAA                  | 4  |
| wt-144600-144720 | 1201 | CACCTTGGTTTGTGTCTCTGTTGCTGGCACTTACTGGCAGCCGAGCAGATTCTAATGGCGCCCGCTTCTTCTCTTGTTTTATAAGAACTCAGCCAGGACCTATA                         | 4  |
| wt-144720-144840 | 1202 | CCTGAGACTCAAAGTCTGGTCTGGTCTGAGACCCCAAGATTTGTCATGCACACCTGCACACCTGTTGGTATTGGGTTTCTATTCTTGTAGTGTGAAAGTTTGTAAAAAATTCATA              | 4  |

|                  |      |                                                                                                                             |   |
|------------------|------|-----------------------------------------------------------------------------------------------------------------------------|---|
| wt-144840-144960 | 1203 | AAATGTCACTAATTCCTCTTACCTGTTTAGGTTATGTGCAATTCCTCAGCCTGCCTATTTCAATTTGCCTAAGGTGGCAATTAAGATGGTTAATTAACCATTTTCCTGTCTGACA         | 4 |
| wt-144960-145080 | 1204 | CCACTGCATGGGCAACCGGTTCCATGGCACAATTTAGAGATAAACATAGATGCTTGTCTGTCTCATGTGCAGAGGAGGGGGTGGTGTGCAATATAGTTTCTGGATTCCAAATTGAG        | 4 |
| wt-145080-145200 | 1205 | TTGGGGGTGCTATTTTCACTATGGAATTAATACTAGACATAGACAGTGGACACCGGCTATATGTGGGATGTCTGTGGCTTGTCTTCTCTTAGAAGGTAATCCCCCATCTTAAC           | 4 |
| wt-145200-145320 | 1206 | TTCCCTTTAAATTTGATGCAAGCCCTGGGTATTTATAGAAATGATTATCTAGGTTTATAGATCTGAAAGGCTGGGCAGAGAATGTTGTAATTTTATTACCTTCTTTACCCCCACCA        | 4 |
| wt-145320-145440 | 1207 | GTATCCAGTTCTAGAAGATCTCTGATATCCCGGGCTGCCATTATCCCTTGAGTGTATAGTCTCTTAACTTAAGCAAGAGCTCCAGGATGTAGCTTTTTTGGTGGGGTGGTTG            | 4 |
| wt-145440-145560 | 1208 | TCAGGAAGAGTTCCAGTGTGCTTTATTTAGATGTAGCTTTGTGTAGTGTAGTGGCTGGTATCTACTAGGAAGCACTAACACAGTTAGACGTGCTAGTTGTGCCCA                   | 4 |
| wt-145560-145680 | 1209 | CTGGTGTATCCGGTCCCAAATGTCCACCAAGAACACAGGGGGCTGGATTGGCAGCAGCACTTGTGCTTTGATTTTTACCCTGTATCAGATGAAATTTGGGCGATGCTAGCCATTTAG       | 4 |
| wt-145680-145800 | 1210 | CTTCCCCTCCCCTAACAGGGGGTCTCGCGGGGTGCCAATTGTGCGCTGCCTTCCCCGCTTCCCCTTGTAACTTATAGCATGATAGGTAGGTCACCTAACCTGGAAGCCTGGTGGGTG       | 4 |
| wt-145800-145920 | 1211 | ATCCTTCTCGGTAGGGAGCGCTTAGGGCTGTGAGCTCAACAGCCCCACCTGGGTAAATGATGTTCTAAGAGTACCCTAATAACAAAACCTGTTAGGGTAACGAAGACCTGA             | 4 |
| wt-145920-146040 | 1212 | TGGAAGTGGTATTGTTGCCGTGAAAGACGGGTGTCTGGCTCAAGTTCGCACTTCTATACAGTGTAAAGCCTGTATCGGAAGTTGGGCTTCGTCAGTACTCGAATAATGTCG             | 4 |
| wt-146040-146160 | 1213 | ACTGCTGCAAAAGTTGGACCTTCCAGTAGGTGTGGGGTCCCAAATCACGAGTTAGGCAGGTGCATTTGGCTTTTAGGAGGGACCTTAAGCCAGACAATGATGTCGCCCTT              | 4 |
| wt-146160-146280 | 1214 | TTTTTTGCAAAATTTGGCTTAAATTAATTTCTTGTAAACATGAAATCTGTTCTATGACCTGTGTTTTAGATGCGCTTGAACGTGTCAGTGAATTTGGACGCAAGCTACTTGAC           | 4 |
| wt-146280-146400 | 1215 | CTTTGCCCGCTGCCTCCAGCGCTGATAAGTGTGCGTCCACTTTGTGTTACAGGTGGGCCAAACCTCCAGAATACAAATGGTGGGGCTTGGTGGGCTGCATAAGGCAGTAGGTTTGA        | 4 |
| wt-146400-146520 | 1216 | GGTGACCTACTTGGACCATGTGGATCCAGTGTCTGTATCCTGGACCTGACTATGAAACAATTTAAAAAATGCATCATAGTCCAGTGTCCAGGGACAGTGCCTCGGAAGTCTCATCA        | 4 |
| wt-146520-146640 | 1217 | TCTCCGTTTGTGTTTGTGTGTTAGTGTGCCAGTACGGCCACCCCTGTGCCACGCCCTGGCATGCTGCTGACATCTGGCCGCCAATTTACGGGGGCCCTTTTCCCCTTGTTCACCCCATAGCAA | 4 |
| wt-146640-146760 | 1218 | GAAGGGTAGGTACATGGGATTTCCCATCAGCACCTGACTGGCCGTGCAATAGAGGAGAGGGCAACAACCAAGGCTGTTGTTTATTTGGGTTACAAGAGCTGCGCGGTGCGATG           | 4 |
| wt-146760-146880 | 1219 | GGTTCAGTATTACGGTTCCTAGATTGACAGATGAACAGAACTGACAACTGTCAACATCTATGGGGTCTGACAGAGTGTCTTACCAGACTTCCATGGAAGATGAAATTTGCTGCTAGCTATA   | 4 |
| wt-146880-147000 | 1220 | TGGGTGGTGTATGGGCTCCCTAGGACTCATGTAGTGGGGCTTTGTGATAGCTAATGAATGTGGCAGCTGTTGTTTGTACTGGACCTGAATGGAACAGTAACCTGGATTCTGTAAC         | 4 |
| wt-147000-147120 | 1221 | ACTTCATGGTCCCCTAGTGACAACATGCTGAATATCTTGAATATGGAGGAGGGGGCTTTGGGTTCCATTGTGTGCCCTTTCCTGGCAACGTGAGGGTCTAGTGTATAGGGCGT           | 4 |
| wt-147120-147240 | 1222 | GGCAGTTTTCTTAGGGGCTAATAACCCGGGTGAGGCGGTTGTACAGGTGTAGACCCCTGGAGTTGAACCAGTACCCTCGGTTACAAAGTCATGGTCTAGTAGTTGTGACCCCTGCAAAAG    | 4 |
| wt-147240-147360 | 1223 | CTACGTGGGGATGAGCAGCCAGGACTTTGGTTGGCAAGCAGACAGGGCGGCATTGGAACCCAGAGAGTGTCCCGGGGCCACCTCTTTGGTCTGTACATATTTGTTATTGTACAT          | 4 |
| wt-147360-147480 | 1224 | AACCATGGAGTTGGCTGTGGTGCACCTCATGGAAGGGGGCTGGGAGCGCCTGTGTTTAGTCTATGGCAATGTTTACCTGCCTGGGTTAGATTCCAAACGACCACACTTTGAC            | 4 |
| wt-147480-147600 | 1225 | GGACACCTGGAGCCCTGATCATTCTCGCCTTTACTGCCACCTGGCTTCTGTTGGGTGACAGTGTGGTGGCGTAGTTGTGCTTAGCAGCAACGCACACCAGGCTGACTGCCTTAGC         | 4 |
| wt-147600-147720 | 1226 | AGTGTGCCCTTTATTGTGGCATCTAAGGAGGATTCTGGAGTGCCTTTCGCTGAAGCATGCCCTGAGACGTAAGTACTGAGTTAGGACTTAATCGCTCTGTGCCCTGGATGAGGGAGC       | 4 |
| wt-147720-147840 | 1227 | GCCAAATTTGATACCTAGCTCTGGCCATAGAGTTAGCCACCCCTGTGCTCTCCCTTTGGCCTTTGCGGTGCCAATTTCCGGTGGTTTCCCTTTTCCGCCGTTTATCCAAATAGCATGTA     | 4 |
| wt-147840-147960 | 1228 | AGAGAGTTGCTAGATTGGCAACTTTGAGGGAACGTTCCGTGAGTGGTGCATTAACACCCGCCCATACCACCCGACAGATTCTGAACCTGTCTGGTGTGGTGTGGTGGT                | 4 |
| wt-147960-148080 | 1229 | GGGTACGACAGTACGTTGGAATGCTTTGGAGCCGAGAGGATGGGCCGCTTGTGCGCTTATGTTACACGTTGCCAATAACCCGGTCCGGCTGCCCGTACCCTGACCCGTTGGCCCT         | 4 |
| wt-148080-148200 | 1230 | TACCTTCTGGCCATCGGGGACCCCTGGTCTAGGGTCCCTGTGTTGCTTCTGCCATAGGGGGGAAAGCATCGCCTTCAGAATTTGGCTGCTCCGTTGGAACATTTGAGCCCTAGTATA       | 4 |
| wt-148200-148320 | 1231 | TCCGTGCTGACAACATTTCCCGCAACATGACATGGGTTAATTTAAACATGTTTGTGTTGCTTGGGAATGCTCTTAGGGCTGGAAGCTTGTCTTGGATTATCGTTTCTGAACTA           | 4 |
| wt-148320-148440 | 1232 | CAGGCGTAGGGCTATTGTAGCAGGATGTCTTCAATCCTGCGTACCAGATGGCATGAAGGCACAGCCCTGTACCATTGGCACCTTTTTTCCATGTAACCTCCGTGATCCTGGTCCCT        | 4 |
| wt-148440-148560 | 1233 | TGGAGACTCAAGTGTGAATTTGTTTGGTGTTCGGCGCCAGGGTATCTCGACGTTGGAATGTCAACTCAACTTGGCACCTCGATAACCCGGCTCGTGGCTGTACAGACGATTGTTTGGC      | 4 |
| wt-148560-148680 | 1234 | TCTGTAACCTGCCAGGACGGCTGACATGTGTTTAGTCTGCCACTGCATCCGGCCTTTGGTACTCGGAGACTAATGGGGGTGGTATGGCACAGGCTGGGGTGGTGTGGGG               | 4 |
| wt-148680-148800 | 1235 | ATGTCCTGGGCTTGTGTCAGCCCATTCGCCCTCTGGGGATGAGATGTTACGGGTGGCCGATACCCTACGCTGCCGATTTACATAATATAAATTTGAAATGCTGCAAGTAGAGGGATC       | 4 |
| wt-148800-148920 | 1236 | TGGACGCGACCTGCTACTCTTCGAAACGCCAACCCAGGAGCGTGCCTCTGGCCCATACTCCCGCCATGCGACTGCTCGCCCTCCAGGCTCCCTGGTGGCCCTTGGCGCTC              | 8 |
| wt-148920-149040 | 1237 | CCCGATTCTGCTTTGGCGCCCTGCGGATCCCGATGACAGCAGGCCCTTCTTCCCGCTTAAATGAAAGAATGACAGTGAAGTGTGACAGAAGGACAGCTTTATCAGTTTACAG            | 4 |
| wt-149040-149160 | 1238 | AGTGCCTCGGAGGCTACGATATCCCGTTAAATGTCTTGTGATTCTCTCAAAGGTGGGGAGGGAGGCTCTCCACAACAATGTTCCCTGGCAGCGTGAAGCCGACCCCTGCCGTTG          | 4 |
| wt-149160-149280 | 1239 | GATGATCTTCTCATGATGGTGTGATAGAGGGTCTCCGGCTAGATGAAAAGGCTGGCCATGCTTGGCCGGTACGATCGTTATGGGTTGTTGAAATGTTCCGGACCGCTCAG              | 4 |
| wt-149280-149400 | 1240 | CTTGAGGGTCTGGCCCGGCTTCCACTCCTGTGGGTAGACGTAGAAGACCGGGTGGAGGAGTGGGACACGACAACGGCCGTAATCTTGGAGCTCAGGGGGGCTCGTAGGTGTTGTTGTA      | 4 |
| wt-149400-149520 | 1241 | TTCCAGCTCCGTGATGAAATAGGAGGAATAACACAGGGAGCCAAAGTACGGATGTCTGTGGATTCCCGTCCAGCGCCAGTGGCTCTTAGGGTAGGGGTTGTAACGGAAGGCAAT          | 4 |
| wt-149520-149640 | 1242 | AATCATATCATCAATAGGGTATGCCACCTTGACGTTACAGGGGCCCTCTCGTTTTCAGGTCGGGCTGTCCACGGAGACTCGGACGTAGCCCTACCAGCGGCTATGGCGTTTACCAGG       | 4 |
| wt-149640-149760 | 1243 | ACACACCTTCCCGGGAATGTGTGAATACGGGCGTATGACTTTAGAATGGGGCGTGTGCTGCGCCAGCAGTAAGGACGCACTGCTCCTGGCTGGTACGGGAGAGCCACTGAGGAA          | 4 |
| wt-149760-149880 | 1244 | GATCTGGGGCTCGTGGTGTAGCTTGTCCCGCTCTGGGTGCAGGAGCGTGTACGCTGAATGTGCTCTGCCCGGCAAGTCTGAGGTAGAGGTAGGGGTTCTTGACCAATCTGAT            | 4 |
| wt-149880-150000 | 1245 | GGGCAACAATGACAGGTAACCTTCCCTTCTATGAACAGCTGCGCGGATCAGGACGCTTAGCAGATGCTCTGGTGCAGAGTGCATAACGGAAGGGCTTGGAAATACCTGTT              | 4 |
| wt-150000-150120 | 1246 | GTCTTCCGCTCCAAAGAACAAAACGCGACCGTAAAGTAGCGGCTGCCGTAGTGGTGGTGTGAAAGGAGAAAGAGTAACCTGAAAGCTGAGTATCTGGCCACCGAGGGGAGGGAGG         | 4 |
| wt-150120-150240 | 1247 | CAGCTCTTGGCACTGCGCTCCAGTGCATACCTGCTTGTGGTGCAGCGGACGATGAGGGGAAGATCTGACTTCCACACGCTCTCATGAACAGCTGTCTGGTTTTCAGTGGG              | 4 |
| wt-150240-150360 | 1248 | CCGCAGCGCGGAGGCTGTTCCCTGAACGACGAGCGCCGGGACGCTAGTGTGATGGCTCCTCCGGGTAAAGCTTCCGCCATGGCCGAGCTGCTGACGGGCAAGGTGAGAGTCCGGG         | 8 |
| wt-150360-150480 | 1249 | GGGCGGGCAGCGGTGCGGCCCAATACAACCTCCGCTGTTAGCTGGTGAAGTATCCGCGGGCGTCTAGGTTGCTACTTCCGCTCGCCGCGGCAAGAGCGCAAGTCCAACTGCTGTG         | 4 |
| wt-150480-150600 | 1250 | CTGGGCGGATGTGACGGGTTTGTCCCGCAGTTGTAGACTGTCAATTTATGGCGGAGTGGCGGCTCACACGCGGGCGCAGCACCAATGGCTGCACGCGCCCTGGAATACCTGTTA          | 4 |
| wt-150600-150720 | 1251 | AACCCCAAGAGAGAGGGCGTGGCCCTGGAGATGGCCCTGCCATCACAATGATTTCTCCTTGGGTGGAACAACGCGCTGCTGCTCCGGGTGAGGGGGAATAGCTCCAGGCATCT           | 4 |
| wt-150720-150840 | 1252 | TTCAGGTCACGAGACCGGGTCCATGCTCAGAGAACAGCCCTCCGGGGGTTGGCGGCCGGGCTCCAGCAGAAGCTGCAGACCCAGCCCTCCTCGGCCCTGCCACCTGTATGTCC           | 8 |
| wt-150840-150960 | 1253 | AGGTGCACGGACCGGAGGCTGCGTCTGATGACATGGCCAGGCTGGTGCAGCGCACACGCTCCCGTGTCCAGCCGAGGCGCGCCAGAGCAGAGCCGGGACTGACTCAGGGCCACA          | 8 |

|                  |      |                                                                                                                         |   |
|------------------|------|-------------------------------------------------------------------------------------------------------------------------|---|
| wt-150960-151080 | 1254 | TCCCCTCGGCCCGCGGACGCCCTCGCCAGCCCCGGCCCTTCATGGGCCCGCTTTCTACCTCTCTCCGGCACCCAGCCTGGTCAGCGCGAGAGGACATGACCTTGGGGTGGGACG      | 8 |
| wt-151080-151200 | 1255 | GGGCAGGCGTGATCCTGGGCGCAATCTTTGCCGATCCCCACACCTTCACTCCTGTTAGGTTGATAGAATGTCGGTACCACGCCACGGGGGGCGGGCCCATAGGAAAAGCCAGGGAG    | 4 |
| wt-151200-151320 | 1256 | AGCGATGTGGGCGAGGATGGGCTCAGGCGGCCAGACACGCAATTTGCCCCCTGGGCGGCCGACGCTGCCCTCGGCGGCCGCTGCCAGCTCCGTCACGGGGGGCGCATAGGAGG       | 8 |
| wt-151320-151440 | 1257 | GGTATATCTAGGATAGCCGCACCTACACAAATGAGACACAGACACAGGTCGTGAGGATTTAGGCAACGCAGGCTTGTCTTATAGTTACAAACATGGGAGCGTGCACCTGGAAGATGCAG | 4 |
| wt-151440-151560 | 1258 | CTGGGGTAGATCTTTACATCTTTACAGGCGCGCAGCGGCCGCCAGACACTGAAGGGCAGAGTTACGCGCGGGCACCTCCAGAGGGAGCCACCAGCCCTACCTGGCCACGGCCAGGGCC  | 8 |
| wt-151560-151680 | 1259 | TCGTAGGCGGACGGGCGGAGCTTGTGTACTGTCCCTCCGCGAGGTGGAGTGGGACACAGTTAGAGAACATAGTCTCTGGTCCCTATATCCACCGCCAGGCTGTGTGCA            | 4 |
| wt-151680-151800 | 1260 | GTTTGCAGGGCCATCCTCGCACTCAGGTTGACTGGCTGACGACCCCTTCTGAAAGTATGGCCGCTGACTGTCACTGGTCTTGGAGAGTCCATAATGGCTGAAGCTCCAGCGGTATA    | 4 |
| wt-151800-151920 | 1261 | GTATAATGAGCAACAGGGCCAAACAGCGCGCGGGCCCTGGGTAGTAGCGGGCAACGAGAGACTCTGTGCAATCAAAACCCAGGCTCCCGGCCTACCCAGGAAGAGCAGCGGCAGGGACA | 4 |
| wt-151920-152040 | 1262 | GCATAAACCCAGGAGAGGCCAAATGAGTCCCGTGAAGGTGACGTTGCATATCAGGCGCGGCTTCTTCCGAATTTGTGCGCAAAAGTTTCCAGATGATGATAACTGTGAGGAGGACGA   | 4 |
| wt-152040-152160 | 1263 | TCAGGACTGCCGCCAGTAGTAGCAGCCGGCTTTCAGTCTTGGACGGCCGTGTGCATGCCCTTGGTGGGGCCTTCCCTGCACATGTTGGGGCCTCTGTTGAGATTGGCTCGGGGCCCA   | 4 |
| wt-152160-152280 | 1264 | TGGTAATGAGGAGGATGATAATGACAGGAGTACCAGACAAAACAGCCCATCAGGTACAGGACACATTTCTGTGGGAGGTTCTTGGCGTTCGGTGAACAATGCTAGGGTCTTCT       | 4 |
| wt-152280-152400 | 1265 | CCAACGCCATACCCCAAGTGAGTCCATACGAGGACACATAGGCCCAAGAACATCATGTTCTGGGTCAAAGGCAGAGACCCTGAGACGAGAACTCCTGAATCATTTTCCAGCACCCAGA  | 4 |
| wt-152400-152520 | 1266 | GCAGCAGTCTATGAGAAGAGCTATCAGCCAGACATCCATTCGGTGAACCAATTTTCTTACAAGATGATAAAACAAGATGCCAGCCAGTGTAGCAGAATCAGCAGGACGAGCAGCAGGC  | 4 |
| wt-152520-152640 | 1267 | TTGTCATGCCGCTGAGGAAGGGCTGTAGGATTTAGTGCACGCATCTTCCGTTGCATTGACGGAAGTCATGTTGGCCACCAGGTTCCACGGTGGACCCGGGGGCCATGGTGGAGAGCA   | 4 |
| wt-152640-152760 | 1268 | TCTTGTCTGGTCAGAGCCAGACTGGGTGGTGTCTGCAGCAAAAAGAGAACTTCCAGGAGCAGTATTTTGCATGCCACCTCCCTGCCTGGTGGACTCCAGACTATTTCTGCATTC      | 4 |
| wt-152760-152880 | 1269 | GCCCTTGGCTGCCATTGTTGCAAGGAGCGATTTGGAGAAAATAAAGTGTAGTTTACAGATCCACGGGCCACGCTCCCTGGGGCCTTTCATGATCCACCGCCTTCCCGATGATGAT     | 4 |
| wt-152880-153000 | 1270 | GACAACCCGCGCTGTCTGAAGCGGCTGACGAAATCGTTGAGATTCTGATGAGAGGCTTGGGGGGTCTTGGCCCTCAAGGCGAGGCTCCTTCTCCTAGGAATGCCGAGCCCGCTGCAC   | 4 |
| wt-153000-153120 | 1271 | AGCTTCGCTCCACTGGGATCTTTGCCAGCCTTCACTACTAGATTACAGCATCCCCGGTGGGAATCTTCCGACGCCCGCTCCTGCTATCCCGCTCGTCCGCGCCTCCCATGCTAA      | 4 |
| wt-153120-153240 | 1272 | GGGCCCTTCTTCCCTTACTTTGGGGATATCCGAGTCTGCTCTCGCCGCTCTTCTCTCGTTTAAACGAGAGAAATAGTAGAGGTCAGTCTCAGGCCCTCCTCTTGGGTC            | 4 |
| wt-153240-153360 | 1273 | TTAGAATGGTGGCCGGGCTGTAATAATCTGAGGACGAGAGAGGGCCCGGAGTGTATCAAAGAGGCACCTGGAGGATGTTGGCCGCTCCTTGGAGCAGCTTGTGCAAAATATGATC     | 4 |
| wt-153360-153480 | 1274 | CACGGCCACGGGAACCGCTGCCCTCGGCGTAGGCCGGTCTCGGCCATCCTCGCTTCTTCCGCCCTTCACTCCCGCTGGGCTCCACAAAGCAGTACTGGATGCGGTCGTGGAT        | 8 |
| wt-153480-153600 | 1275 | CTGGGGCAGTTCTCGTTGCGTCCAGGAATCTCTGGTAGACGCCAGGTGAGGCATCTGGTGCCTTGTAGGCTGAGAGTTCGGGCTGAGGCTCCGTTGAAAAGCAGAGCTCCCGAT      | 4 |
| wt-153600-153720 | 1276 | GGGGACCTGCCCTCAGGAGGCTGTGTAGGCTGGTTAGGATGCAATGACGGGCAAAAAGCCACAGGTAGCCCTTGTGTAATGACTCTTGGAAAGGCGCGTGGGAGAGGAGGCT        | 4 |
| wt-153720-153840 | 1277 | GGCCGCTCTTTACCGGGCATCCGCCAGCAGGTCGAGCAGCGCCGGCAGCGTGTCTGCACAACTTGCAGGCCGCTTCCGGACGAGCTCCACCCCTTCTCAGGGTCTTGGCC          | 8 |
| wt-153840-153960 | 1278 | GTCCGTAGCACCCCCACATATCTTCTTGAATCAGCATTACGACAGGAGAGGCTTCTCGGCCCTCAGGAGATGGGGCCACAAACAGGCTCCGGGTGGTGTGGCGGCCAGGGC         | 4 |
| wt-154080-154200 | 1280 | GGAGGGGGCCAGGGCTGCAGGTTGGCGGGCTCAGGGCTCCACGAAGGCCTTGGCCCGCTCCAACATGCTGGCGCCCTGCAGCGTCAACCGTCTCGGCGATGGAGAGGCAGGGAAGAG   | 8 |
| wt-154200-154320 | 1281 | GCCGTTGGCCACCCCGTGAAGCCGTAGACGGCTTGCACGTGCATGATGGCCAGTCTGCTTGTGAGGATGTCCTTTGGCGCGGATCCTCGCAGGCCGCCAGCAGCTTCTTAAAT       | 4 |
| wt-154320-154440 | 1282 | GGCCTTGCCTTGGCCAGCCAGGAGGTCAACAGACTAGCCAAAGAGGACTCTGTCAGCTCTTACAAGGTGATAGACGCCCGCCGTTGAGCCTGAAGGACTCATAGTCTTCCCGG       | 4 |
| wt-154440-154560 | 1283 | GCGCAGGCCGCTAGCCTGTGCTCTTCCCGCGTATCATGGTGAATAACAGAGATTATGAGCCTGAATGATGCTCGGGTAGAGGCTGGCAAAGTCCACCACAGAACCGGGGAGTT       | 4 |
| wt-154560-154680 | 1284 | GTAGAATCCGGACAGGGGCTGGATGACGGTGGCCCGCTGGTAGCCGTCGCCGTCAGAGGCCAGGGCATGGGAGGATAAAGTTTCCCTTTGGCGCGCCGACGAGGAGGAGGAGAACAC   | 4 |
| wt-154680-154800 | 1285 | GCGGATCTGCTGCCCATCGTCCAGCACCCGCTGCAGGGGATGTGAGCGATCTTGGCAATCTTGCACCTCCACGTGGATACGAAATGGTTAGCAGATCCATGACCAGGGCCGAGTC     | 4 |
| wt-154800-154920 | 1286 | CTGCACGAGTACATGCCGAGCCGCTGCGCCCTCGGGCCGCTGCAAGAGGCGAGGAATCTCTTGAATGCACATCTCCTTCTTGGCCCCAGTAGGTGCTGCTACTGTGTC            | 4 |
| wt-154920-155040 | 1287 | CAGCTTGTAGTCTGAGAGGCTGACCTTGTCCCGCACAGCGGCTACATGTCATGGGATGAGGCGGATGCGGACCTTGGTGTGGCCCGCAAGAAGCCCTTCCCGCATCAGGGG         | 4 |
| wt-155040-155160 | 1288 | TGCTGACCTGCGCAGACGCCCCAGCCCTAATTTTCCAGAGAGGCTGGGTTGATGCTGTAGATGTGCTGGCTCTGTCCAGAATGATGGGCCAGTCAAAGTTGGCCACGTTGTAGCC     | 4 |
| wt-155160-155280 | 1289 | GGTCAACAATCTCCAGCTGAGGCTCTGATGAGCTGGAAGAAGGCGTAGAGCATGTCCAGCTCCGATGGGAAGTCTGACCTCAACCCCTCTATGCTTCCGAGGTGCCAGGCTCAG      | 4 |
| wt-155400-155520 | 1291 | ATCGAAGGCCAGGGCTGGTAGGAGGGCCAGGAGCTGTCTTACGCCGAGCCAGAGGTCGCCACCTCACAGTCTGACTCGAGCTCGGCGTACGAGTCCCGTGTGGAGGGGGGAT        | 8 |
| wt-155520-155640 | 1292 | GGCGCGCGGCGAGCTGTACCAGCAAAGGTGACAAAGTCAATGTCCAGGACAAAGCGCGCGTGGCATCCACGTTGGCCTCAAAGATCCGACACCCGCTGTGTCTTGCAGCCAGCTGGC   | 4 |
| wt-155640-155760 | 1293 | CACGTGACACACACTGTTGGGATGGGAGAGGGTGTCTTGTGATGCTGCGCGGATGTTGCCGTAGCCATAATGGAACGGCGCGTGACCTTCTCCACCCAGACCCCGCAGGGGGTCTC    | 4 |
| wt-155880-156000 | 1295 | ATCGGCTTGCGCCGGCCAGTAGCTTGTAGCAGTACCACATGGCACCACATACCCTGTTTATCCGATGGAATGACGGCGCATTTCTCGTGCCTGACACCGTCTCGAGTATGTCGTA     | 4 |
| wt-156000-156120 | 1296 | GACATGGAAGTCCAGAGGCTTCCGTGGTGTCTGCTCCGGCTTCCGCTGCGCTTGGGACAGCTGGCGCCACCACATGCCCTTCCATCCTGTCACCCCCACCACCGTCCAGGGA        | 8 |
| wt-156120-156240 | 1297 | GTCTTGGTAGAAGCACAGGGGGGCTGAGGCCCCCGACATCCACCACCCCTGCGGCCGCTGGTGTCTGAAACACTTGGGAATGAGACGCAAGTACTCCTTGTGAGGCTTTTCAGAAG    | 4 |
| wt-156240-156360 | 1298 | GCCTTTATTAGGCTTAGGAAAGGGTTATAGAAGAGTCCCCAGACATGGTAAAAGTCACTGCTGCTCCCAAGCAGTGGCGCGGGTCTCTGGATCGTATAGGCTCTTCTCGT          | 4 |
| wt-156360-156480 | 1299 | AGGCCTGGAAAACGGTCCCTGGCTGCTGCAATGCTCTGCTGGCACTGAGGGTCCGCGCGCCTCTGAGGCTGCTCTCTTTGCTCTCGTGTGTCATGACGCGCTAACATGATGGCT      | 4 |
| wt-156480-156600 | 1300 | TGTAATCTGTCTTACTAATGGGATTAATGCCTGGACCTCACCAGAGGATGTTGCTGAGCGAGTCTGCGATCCCGGGTAGAGCATGTCACCGGCTGCTGCGACATCTGGCGGCTG      | 4 |
| wt-156600-156720 | 1301 | CGCCTCTGAGGGAAATAACCAGGATCACCACCCCGCCACCAGGACCAGAATGAGCATGCCCGGAAGGGGTTTTGAAGAAGGAGATGAAACCAGAGACCAGGCTGCTAAACAACCC     | 4 |
| wt-156720-156840 | 1302 | CCCACCGTCTGACTAGGTTGGTGTGACTGACCCACGCTACCCAGACTGTCCATAAGTCCCCAGGGCCGTCACGAATGATTTCTCCGTTTGCAGCTGCATTTGCCAAATCCTTC       | 4 |
| wt-156840-156960 | 1303 | CGCAGGCCGCGATGTTTGGCGCTGGAAGTGTACTCCCGGAAGATGCCCTCCAGGTCAAAAGACCTTGGAGGACGCTGTTGCTCCCGTGGATACAGCTCCAGGAGGCAAAAGTCAATG   | 4 |
| wt-156960-157080 | 1304 | TCTCTGATGAGGAGGTTTGTGAGATGAAGTCTGCGAGGTCGCAAGTCCCTGAGGTCGCTGAGGCTGCTCTTAAAGTGGTGGTGTGCTGTTGACGCTGGATCTCGTTGCGGACTGGAAG  | 4 |
| wt-157080-157200 | 1305 | TAGTACTGGTGGTGGCGCACACCTCCGTCATCTTTTGTGAGGAAGATCTGCTGTGCGGTCGCCAGCTGTCCCTCGTAGGCTTGGTGTGCTGATAAAGCTGAAGGACACCAGG        | 4 |
| wt-157200-157320 | 1306 | GGGCGGAGTAGCACATGGTCTCGAGCCAGGGACCTCATGCTCTTGGCAGGGTACGGTGGCTGGTTAACGGGCACGCACTGGGAGACTGAGATGACATCCCCAGGCGCTTGGCC       | 8 |
| wt-157320-157440 | 1307 | GCCACCGCTTACCAGTAGTGTGACATGACGGTGGTGGATTAATCTTGGTGTGCTCTCAGCACCATGTTCTGCCTTCTGCTCCAGGCACCAGGCCCGCGCAAGTCTCCAGC          | 4 |

|                  |      |                                                                                                                                   |    |
|------------------|------|-----------------------------------------------------------------------------------------------------------------------------------|----|
| wt-157440-157560 | 1308 | ATGCGGTTGATCTGGCGGCGCAGGGAGTCGTAGGCAAAATGGATCTGGACGGTGGCGGGATTGTTGAGGGTGCCACAGGACTTCCGGGGGGCGTGGGGGGCACCAGTGGTGGCGGTTTC           | 8  |
| wt-157560-157680 | 1309 | CCCGCATCCGCCCTCCGACGCCTCAGAACGCGCGCGGGGGTCTCCCGCGGGCCGGATGGGGCTGGGGGCGATGGACTGCTGGGGGGTGGAGAAAGTCGGAGTGGTAAGCTCCGTACAGG           | 8  |
| wt-157680-157800 | 1310 | TTCTTGACGGTGGCCAACGAGCGCGGGGTGAGAGGTAGCCAAAGTAAATAACAATCTCCGCTCGTTATAAAATATGTAATGGCTTCTGGCCCTTCTGTAAACGATCTGGACGGCCTCG            | 4  |
| wt-157800-157920 | 1311 | TACTTCTCATGCATGGTCTTTGTTACCTGCTCTCGATGCACCTTGAAGCGTCCGGGAGCTCTATGCCACAGGTTGTTGGTTCACGAAGCTAGAGGTGCCCTCGTCACTACAAAATGT             | 4  |
| wt-157920-158040 | 1312 | ATTGACTTCCCTGTTTCTGTGGCGATGGTCGAGTCAAAGGTTTGGCCAGTGTGAAGCGGGCAGTAGGCTGTCTGTCTCGAGCTTCCAAGATAGCGTGTAAAGTCCCTTGTCCAGGAAG            | 4  |
| wt-158040-158160 | 1313 | GCTCGGGCTTCCGCTTCCGGGTTCGCTCCGCTGGTTCGTAGTCCACTATCTTGTAGTTCTCAGTGGAAAGAGTTCGCCGCTCATGGAAGTTTCTCTATTTTCCCGTCATAG                   | 4  |
| wt-158160-158280 | 1314 | AAAGGGGACATTTCCACAGTCTGCCCGGTGGTGTTCACAAAAGAACTGAAGCGGACCTGTTGGACTTGGCCATCATGTAGTATCAGGCAAGTTGACCGGTAGTTCCTGTTTAAAGTCCAT          | 4  |
| wt-158280-158400 | 1315 | ATCAACCACCCGGGGGCGTCATAGAGCTCCGCTGGCTGGCTAGCGGCGCACCCCGTGGCCAGGCCCGGGTGGGCTTATAGGTTGACGGTGTATTAACCTCGTCGGGTCTACATAC               | 4  |
| wt-158400-158520 | 1316 | ACGCGCGTCAGCCCATCTTTGTATCTTGACCGGTTGTAGCACTGGTAGATGGTATCCATCTGGTCAGTTTCTGTAGCTGTCAACGGGAGAAGTCTCCCTCGTCCGGTGGTACAGGAG             | 4  |
| wt-158520-158640 | 1317 | TCCCGCTACCAGCCATTGTAGATGAGAATGTTGGTCACTATCTTGGTGTAGGAGCGGACCTTAAACGAGTAGGGAATAATGTTGTCTTAAACACCATCAACAGGCCCTCCGTGTGATTC           | 4  |
| wt-158640-158760 | 1318 | TCCCGCTGCCAAACGAGGGACACTGGATGCCGAGGAGAAGCGGAACAGGTCGCCGTCAGCTGGAGAGTCCGACAGCTCGAAAGGAAAGCTGGTTGCTGACGCGTGGCGGTAGGCTGC             | 4  |
| wt-158760-158880 | 1319 | ACCGTGGTGGCGGGGGTGCGGCTGCTCTGGGGTCTGCGCACCGAGACGGCACGCCAGGGCGGCTTGGACTTGGCCATCATGTAGTATCAGGCAAGTTCAGCCCTAGCAGGAGTCTCTCTATTGGAGGTG | 8  |
| wt-158880-159000 | 1320 | CAGGTAGAGAAGGGCATATAGATCCTTAAATACCCACCCCTGCCCTTATACAGAAGAAATAGGGGGCGGTGAGAGTGTACGTGAGGTAAGGCCATCCGGGGCAGGGCTGGCGGGG               | 4  |
| wt-159000-159120 | 1321 | GCTGACCGGTCGCCCGGGCGCAGGATCAAGGACCGCCCGAGGCTTGTGTTAGAGGGACAGGTTAGGAGCGCCTCGCGCAGCGCCCGGCACAGAATTGCTGGCTAGATGCCAGTGA               | 8  |
| wt-159120-159240 | 1322 | GCCCCGGGTACGCTGTAGAAGCTGTTGAAGGAGGTTCTATCCAGTGCCTCGGCTCGATGCTGGCCATATCAGGGAAGTCAAGAAATGCTTCTGGTGGGGCAGGCTACCTGCGGCGTC             | 4  |
| wt-159240-159360 | 1323 | ACAGCAGCGAGCCAGGGCCACGTTGCTGGTGGGGGAAAGAGCCGCTCTCTCCCGCAGGGGCCCGGTGATGAAGGTGTACAGGCTGTGCGTCAAGCGGTGCAGGTGCTCCGAGCTCAG             | 8  |
| wt-159360-159480 | 1324 | GGTCTGGGTAAACAGGTGTTTTGATGTACTTGAATCTCAAAGCGGCGACCCCTCGCGGCGCGCCTGTCTCCAGGGACCCGAGACGAAGGCCCTCTGTAGAGGAAGTGGTTGCG                 | 4  |
| wt-159480-159600 | 1325 | CATGCGGGCCAGCTCCAGTAGACCACGTCACCCAGACGCGCAGGACAGGGTCTCGGTGAGGTTCTCGCTCTGTTGCGCCAGGCAGGACTGCAGCTTGGCCAGACCCTCGGTGGCCAC             | 8  |
| wt-159600-159720 | 1326 | CTGGCGCAGTACTGCTCTTGCCTTGGCCTTGGCCTGAGCGCTCCGAGAGGGCGCGGACGGCGGGCTCTCGTGCACAGCCGCGGGGGCAGCTCCGGGCTCTCCGGGACGCTCTCTCGCC            | 12 |
| wt-159720-159840 | 1327 | TGGGCGCAACCGCTGCATGGCTGGTGTAGCGCGGTGTACAGCTCGTCTCTTTTGGAGGATGGCCCGTACTGGGGTGGCGCGTGAAGGGCGCGGGCGAGTCCGCCTTACGGCCTC                | 8  |
| wt-159840-159960 | 1328 | CACCGGTCGCCCGAGGAGCTGTAGACCCCGCGCAGAAGAGCCGCTCCGTGGCCCCGGGACCCAGCGGCTCAAACAGGTGAGTACGCTTGGCCCCCGCAGCGCCCTCTCGCAGGGCCC             | 8  |
| wt-159960-160080 | 1329 | CGCACCGGGCCAGGCAGGCTCCGGGCAACAGGGCAGAGAGGGGGAATGGCCGACCCCTCCCGCTGGCCAGTACAGTGGCCGCGAGAGTCCAAATAGAGGAGGCTC                         | 8  |
| wt-160080-160200 | 1330 | CGAGAGCTCCGCCACCTCCGGGGCACTGTGAGAAAGAGTGTAGGTGTCCAGCGCTTGGTGCACCCCTCTGCCTCCGGCCCGGGGGCCCGGGACCAGCGCCCTCTTGGGCGGCC                 | 12 |
| wt-160200-160320 | 1331 | CGGCTCGCTTCTCTCAGCTCCAAAGGTGCCGAGCCCGCTGGCGGACTTCAATCTCAAACAGTCCCGAGACCGGCTCCGATCACCGGCACCGCCAGGTGGTTACAGGAGAC                    | 8  |
| wt-160320-160440 | 1332 | GTGGGTCCCTTGCCTGGAAGGGTGGCGTGGTGGGCGAAGCAATACAGCTGCCACACAGCGCCAGAGGGCAGAGAGGTGATGTAGAGGCGCGGGTCTGGGATGGGACTTACGCC                 | 8  |
| wt-160440-160560 | 1333 | CGAAAGCGGCCAGCAGATCCAGGGCCCTTCCAGGCTTCCAGCCCATGGTGTGAGACGATGCAATAAAACAGCTATTGATTCTCTTCAAATAAATCTCTATGTCAATTATTAGGCA               | 4  |
| wt-160560-160680 | 1334 | CAAATTCATCGACTTTATGCCCGTAAAACCTCACAGATACGCGACTGAGGGGTACGGAGAGGGCGGACCCGGTACCCTTTTACAGGGGCGAGCAGCGCGGCGAGGCGCTC                    | 4  |
| wt-160680-160920 | 1336 | CACCACCGCAGCCAGCTCCAGACTCCGGGGTCCAGCCGGGTGCACACGCTACAGCTAACCGCCAGGGCGTACACTGGCTGTACGCCCGCCGAGCAGCCCGACATCGCCCGCCAGG               | 8  |
| wt-160920-161040 | 1337 | GGTCTAGACCTCGAGTCCGGGGGAGAAGGTTGGCCAGACGGCGTTCGCTGCTGCCCGGAGCCCTGCCCTCTCCACCCAGCAGCAGCCCGGGCAGGCGTGCAGCGGTTGCTGACC                | 8  |
| wt-161040-161160 | 1338 | GGCTCGGCCACGCTGATAAAGTGTCTGGGCTGCCCGGGCCACCCACACTCCCTCCAGAAAGTCCCGAGCGGCTCCGCCGTCCACTCTATCCCGCTGGAGGCAATGGTCGCCAGG                | 8  |
| wt-161160-161280 | 1339 | GTTTCTAGGACGCTGTCGCCAGGACGGAGAAGCGGCCAAATAAGTACTCCCGCTCGTCCCTAGTCAGCGAGGGCGATGCTCGCCCATGGCATCCACAAGGTTGCACACCACATCAAAC            | 4  |
| wt-161280-161400 | 1340 | ACACAGTCTTCTCTGTTTTGATATAATGGCTCCAGGCCAGCCCTGATGTTCTCAATCTCATATGTGTCGCGGCTGGTTCGGCGCTTACGGTCAACCCTAGGTTGGGGTG                     | 4  |
| wt-161400-161520 | 1341 | GCAAAGACAAACTTCTCCGATGGAAGAGCCCGGCTGCTTGCAGACCCAGCCCGGGGGCTGACAGCAGGTTCTGTCCACGCCCGGGCCATAAAGTATCCAGGTTCCCGGCC                    | 8  |
| wt-161520-161640 | 1342 | TGGAATATCTGGTGTGGCGTTGACCCCGTACTTGTGATGGTCACTGGCAGCGTGACAACCCGAGCGGCGTTCAGACCTGGTAAGACAGTCTGTGGCCGCGCAGACCACCGTG                  | 4  |
| wt-161640-161760 | 1343 | GTGCGAGTAAGGGAGGAGTGGCTCCGCTGAGCCGCTGCCACTCCACCGCCCGGCTGCCAGTACGTGGGGTAGTCACGGGCGGGCAGGACTGCGTCTCGCCACCAGTCCCTGA                  | 8  |
| wt-161760-161880 | 1344 | ATCAGGCTGATGTAGAAGTGGTCTGGCCGACGCTTCCAGGATGGCGTGTGTTGAGCCTCTGCTTGGCGTAAGTACCAGGTTGCCAGGCACCCACATGTATGACGTTGCTCTTCTGGG             | 4  |
| wt-161880-162000 | 1345 | GCCCGGGAGCCCGTCCAAAGAGGGCCAGGTCAAGTACTCTCCGCGTGGCCCGCTGGGACAGGGACCGAGCGCCGCTGAAAAGTGTGCCACAGGTACAGGCTTGGAGC                       | 8  |
| wt-162000-162120 | 1346 | TTAGTGTCCGGGAATAGGGTCTTGTGGTAGGTGTTGAGGAATTCATGTAGGGCCCGTGTGATGATGATGTTCTCCCTCTGGTAGTGGACTTGTGAAGCTGTTCTGGAGGGCGCAATC             | 4  |
| wt-162120-162240 | 1347 | TCCCCCGTGAAGACCACCTGTTCTTGTATGTTGATGTTCTGGGGCACAGCATCAGCACCTTGGACATGCGCACAGGCGAGCCCGGGCGTACACCCGGCCCTGCAGGGCCGCTCCAGG             | 8  |
| wt-162240-162360 | 1348 | TCTGGCAGTTCGAGGTGGGCTCCCATGCACCACCTTGGCCTCTTGGCCGTGAGGACCCCTTGTGATGGCCAGGCTCCTAAAGTTGGTGCACAGCGTCTGGTAGTACCCTTTAGC                | 4  |
| wt-162360-162480 | 1349 | CACCTGGGGGCTCTGGCCAGCCCGGGGTTGTCACTTCTATAGCACATACAGATGGCCAGGGAGATGCTGCAAGGATGGTCAAGTGTGAGCGGTAACAACAGCTGGGTGAAGATGGGG             | 4  |
| wt-162480-162600 | 1350 | CAGGCGGGCTGCGCAAAGGGGTTGCACAGTACTGCATCAGCTGGTAGCAGCTTGGACAGGTCCTGTAGGTGATGTTGTTCTTGGCCATGCTGTTCAAACTGGACCCTTGGCGG                 | 4  |
| wt-162600-162720 | 1351 | TCCAGTCCGCGCATCCAGCTCTTGAACACTTGAACAAGTCAAGCGGGCCATGGGGCTCCTTCTAGCTTCCCTCAGCGTCTATGCCAGGCCGAGACAGCCGCTCCAGCAGGTTCTGG              | 4  |
| wt-162720-162840 | 1352 | TTCAGCTGCCAGTAGGTGTAGCGGGCTCGTCCGCGGCTGCCCGTCCGCTCTTATCGATGAAGTTGAGAAAGTTGCCAAAAAGTCCGCTCTGTTGAGGAGCCCGAGGCCCC                    | 4  |
| wt-162840-162960 | 1353 | GAGATCACATAGGGTCCCTCCGCTGCGTGGACATGACGGGGGGAAGCGGTCCCTCAGCTAAAGAAGAGCGTGTTCAGGCACACGGCCGGGGCCCGCCCTCGCAGAGCGAGCACATG              | 8  |
| wt-162960-163080 | 1354 | GGACTGGCGGCCCGCCCGCCACGTAGCTGCCGCTCTCCGACCCGGGTGAGAGAGCTTCTGTCCCTGGCAAACATGCAGGTAGTAGGATAGCGGGGCAAGAGGTTGGGCGAGAAAG               | 8  |
| wt-163080-163200 | 1355 | GAGGCCCATAGACCAGGTGCTCCAGCAGGTAGTTCCCGAGCCGTTGGTTCGGGTGACGCTGGCCACCCCGCCGAGAAAGCAGGGTCCGGCGCAGGGTCCAGGTCCTCCCTGTC                 | 8  |
| wt-163200-163320 | 1356 | AGGGTCCCGAGGCTGGGTCTATAGAAAGTCTTAAAGAGACTCTTCCGCTGACCGGCTTCTGACAGCCCGGAGACGCTAGAGGACGGAATGGTGGCAAGATCTCGCTGGAC                    | 4  |
| wt-163360-163680 | 1359 | ACCTTGGCCACTTGGCTGCTGACAGCTTCCGCTTCCAGCAGCTCCACAGCTTGGCCACCCGTCGAGCGCGCAGCGCTGCCAGCCCGGTTGACAGCGCCCTCGTGCATGCAG                   | 8  |
| wt-163680-163800 | 1360 | CGGCTGAGGTCGAGTTGTAACAAGTGGCGGAGCTGGGGCACGCCCTCTGGGAACACCTCTTGTGATAGAGCGGGACCCTAACGCTCGCAGACTGCCACCCGCTACCTCTGTTTTAAC             | 4  |
| wt-163800-163920 | 1361 | GATGGAATGGCCACCAGGTTTCCGCTGTAGAGTGCCTTGAAGGCCTCGGTTATTGCCACCGCCCGAGTAGGCAGAGGATCTAGCCCTCGGGGAAGAAGTCCCGCGCTGGAG                   | 4  |

|                  |      |                                                                                                                         |    |
|------------------|------|-------------------------------------------------------------------------------------------------------------------------|----|
| wt-163920-164040 | 1362 | CTTCCCTCGGTAGGGCGTGTAGGCGTGTACCCAACACCTCCTGGTCTCGCCACAGAGGGCCTCGAGACCAGCCCTCAAAGATGGGGGAACCATATGGGCATTGTGGAACACG        | 4  |
| wt-164040-164160 | 1363 | TAGATGTCCTGTGATAGGAGTACGCGTAGGAGCCCGCAGTTGGGGTGGGGCTCCTGTGCAGAGCCTTGACATTTGATGCTGAAGCCCGGCTCCACGGTGATGCCCAAGGAGCGGC     | 4  |
| wt-164160-164280 | 1364 | ACCGTCAGGCACCTGTGGCCCGGTAGCCGGTCCCAAGTGTGGCCACCTCCCTAAGAGGGTAGTGGCCAGGGGTAAAAGTAGATGTAGCCGCACGGACCCGGCTGGCTGGCTGCC      | 8  |
| wt-164280-164400 | 1365 | AGATTATCCTCGCTAGTCTGTGCACCCTGCATGATGCCAAGGTATCGCCCGGCTCCAGTCCACATTAATGTTACACTTTACTCATCACGCAACACCCACTGTTTATTATTAC        | 4  |
| wt-164400-164520 | 1366 | AAAGATTTCAAGAAAGTCAAGTCAAGCTGGCCAGGGCCACGTCACGGGAACTGACGCTCTCAGCGATCTTGGCATGCCGCCAGCCTCGCAAAACAGAGCTGCGATAGAGGGCCAGGTAG | 4  |
| wt-164520-164640 | 1367 | TGGCGGATGCCCCAGCAGCAAGCGCGCTCTTGTGGTCACTCAGGTAGTTCCGACCCAAACACTGTGTAGCACAGCACCCCTGAGCCGACAGTGTAGTGGTGTG                 | 4  |
| wt-164640-164760 | 1368 | TTGTACACTGCGCGCAGGACGCTGATGATGAGCCGCTACGTCGCTGCTTTGCCCCGATGTCGGCTGTCTGTCAGGCCAGCTCCGGGTACAGCTTCTATCCTTCTCAGGAGGGCTTG    | 4  |
| wt-164760-164880 | 1369 | ATGAGCCGGCAGAGGACCAGGGCTGGCAAAGGCAGGTCTTTCTCATCCGGGTGAACACCGCTACATGGCCCTGAACATGAGGTAGCTGGACTCAGCCACCTTGTGTCGGCGCGCGAG   | 4  |
| wt-164880-165000 | 1370 | GGCGCAGCCACGCTCGACCAGGGTCTCACAACACAGAATCTGTAGACTTGGCTGGCTCATGGTCTGTCAGGCCAGCTCAGGGCTCAGGCTTATATGATAAAATGGCGGTGGC        | 4  |
| wt-165000-165120 | 1371 | AGAATAGTATAAGACCGCAGGCCTGGGTGAGGAGTCCAGAGCAATGGCCAGGTTTCATCGCTCAGCTCCTCTGTGGCCCTCTGTGTGCCGCCGGCCAGGCTGTACCCTTTCTTG      | 4  |
| wt-165120-165240 | 1372 | GGTAGCAGTACCCCTGACCTCTACTGGAGGAGGTGAGCTCGTCCGTCAGAGATTGAGTCACTGTGTTAACTGGCCAGGAGAGGAGCAGGTGCTTATTGGCCGATCACCAC          | 4  |
| wt-165240-165360 | 1373 | GATGTCATCTTTATAGAGTGGCCTTTACGGGCTTTTGTATCCACAGAAGTCCCAACCTCTTTTGTAGTAGTCCAGCCTGCCAATCTCCCTAGACGGCAACTACCTGTGCGCG        | 4  |
| wt-165360-165480 | 1374 | ATGAAACTGGCGAGACCAGGTACCAGAAGCAGAACCTGAGCGTGGTGAAGCTCTAACGCTGTCTGCCACTCCGAAAGGCTCAGTCCCAGACTTCTGTCTTACTGTGACA           | 4  |
| wt-165480-165600 | 1375 | TGCACCGTGAATGCATTTCCCCTCCACAGTCCAGTGGCTCATGCCGAGGGCTGGAGCCGACCAACTCGGGCAATGGCGGTGTTATGAAGAAAAGGATGGAGGCTCTGTGT          | 4  |
| wt-165600-165720 | 1376 | GCTGTTGACCTGTCACTTTCCCAAGCCCTGGCACCTGCCAGTGAACCTGCGTGGGAAAAATGACAGGAGGAAGCCACGGGTTTATGTTTCTGGATACTGTGCGCAATAAAGCAGCTTG  | 4  |
| wt-165720-165840 | 1377 | CCTATTTACCTTGTGTTAGTGTGGCATTGGGGGGTGGCATTGCGGGTGGATAGCTCGGACTCGTGGGAAAATGGGCGAAGGGCACCGTGGGAAAATAGTTCAGGTGACAGCAGC      | 4  |
| wt-165840-165960 | 1378 | AGTGTGTGAAGATTGTACAGCTCTGGTGTGGAGAAAACGGGGTGGCGGTGATCAGGGAGAACAATCCCGGGGACACCTGCACGAGACCCCTGGGCTCTCAGGAACTCCGCGCG       | 4  |
| wt-165960-166080 | 1379 | GTCTTGCAATTGGGGTGTCTGTAGCGCCGCGTTTACAGCATCACAGTTATTTTGCCTGAAGCTGTCTGGGGCTAAATCCCTCTCGCTTGTCTCAGAGAGCATTTAGGCGCG         | 4  |
| wt-166080-166200 | 1380 | TTTTGCAGTCGCTGTGCAGCTATGGGTCCCTAGAAATGGTGCCAATGGCGCGGGTCCCTAGCCCGCGGGATCCGGATGGTACGATGGCGGAAACACTCCCAATATCCATC          | 4  |
| wt-166200-166320 | 1381 | TGCTTCTGGCTCTTCTGGGAAACACCCACCCACCCAGCAGTGAAGAACGTAATCTAATGAAGAGCCCAACCGCTTATGAGGACCCATATGGGGCAATGGCGACCTGACTCGGA       | 4  |
| wt-166320-166440 | 1382 | CTATCAACCACTAGGAACCAAGATCAAAGTCTGACTTTGGATTGCAACAGCAGGGAATGACGGGCTCCCTCCCTCCCTACTCTCCACGGGATGACTCATCTCAACACATATACGA     | 4  |
| wt-166440-166560 | 1383 | AGAAGCGGGCAGAGGAAGGTAAAGTGCATCTATCTGACTTTTATTTATGATCACAAGTCACATCAATAAAGGGGCGCATCTAGCGGGAGATGTTATCCACACCTCCAATTC         | 4  |
| wt-166560-166680 | 1384 | ACATCTCAGGACAAACAGGTCAAAGTCTTTGTTGACACCCAGCGTGGCTCCAGGCGGGTGAAGCGTTGGATGCAGTCTCCGCATCGGGCGGACGCGCTCCTCCAACGCTTTCT       | 4  |
| wt-166680-166800 | 1385 | GCGGATCAGTCGCTGGCTGGTGGGCATCGGAGTGGTGGCGGCTCCACGGGACACGCTCTTCTTGGCCTTGTCTTTGACCTTTTGGACATCTTCTGAAGGAACGGCGGAGAGT        | 4  |
| wt-166800-166920 | 1386 | AGCGTAGAATCCAGCCAGTGGTCTACCCGGTGCATGTTGGCTTCTAGATGAGGAGCAGGCATAAAAGTCCAAACAGGACACAGAGTACCACAGGAGTAGTCTTAGTCTGCTGACGTC   | 4  |
| wt-167040-167160 | 1388 | GCACAGCTGTTTTCGTGGACTTTATACAGTAAGGACAAGGAAAGAGGCCAGGGAATGTGAAAGATGAGCGAGGACAGGTGGAGGTTTTGGGCTAGCTCTTAGTCTGGGTGTG        | 4  |
| wt-167160-167280 | 1389 | AGAGAGGGATTAAGTGCTTATGCGCAAGAATGTGCAACAACAGGTGTTCTCGCTCTGCTGGCATGAGTTAGGTGTTGGCTGGGCTGAATCAAATGTGATTGGCACAAGATGAA       | 4  |
| wt-167280-167400 | 1390 | AGCAAAGTTGCTGGAGTTACTGGGTGGAGACAGGGATGTATGTGGTCCCGGCTGGATGCCAGTACCCCTGTGGAAGTAAAGGGCCCTCATCTGCCTGGTAGTTGTTGTGTCAGAGGTC  | 4  |
| wt-167400-167520 | 1391 | TGATGTGTAGGAGGGTGGTTCAACGCAGGGCGTGGTGGCGGAGTCTGGCAACGCCGGTCTTGTCTACCTGTGTGGTGTGTTAAGGGCTGGTAAAGGTGTCTGCCAATTCTC         | 4  |
| wt-167520-167640 | 1392 | GCATGCTCCCTTTCCCTTGTGTTGAAATAGAAATGAATGTGGCTTTTTCAGCTAGACAGCAGTGGGCTAAGGGAGTGTGTGCCAGTTAAGGTGATTAGCTAAGGCATTCCAGTA      | 4  |
| wt-167640-167760 | 1393 | AATGGAGGGAGAGTCACTCAGGCAAGCCTATGACATGTTAATGCCTAGAAAGTAAAGAAAGGTTAGTCATAGTACTAGTGAAGTGGGCGTGGGGTCTGTCATCTCCACCGGAA       | 4  |
| wt-167760-167880 | 1394 | CAGAAGAACCAAAAGCAGCGTAGGAAGTGTGGATCACCGCCCATGGCGGAATCATGACTATGACCAGCCCTCCGCTGTGCATCAAAGCGGGCCCTGGTCACTCTTTGTTTT         | 4  |
| wt-167880-168000 | 1395 | CAACCTCTCCGTCATTTGAGGGCCCTCCATCAATTTCCAGCAGAGTCCGATGGGCTATGAGGACGGGGCTATGAGGAGGGGCTATGAGGAGGGGCTGAGGAGGGGCTGTTG         | 4  |
| wt-168000-168120 | 1396 | CATCAGTGTGTGAGGGTCTGAGGCAGCGGTCATGTGGCCATTGTCATCAGTGTGTCAGGGTCTGTGGCCATTGTCATCAGTGTGTGAGGGTCTGTGGCCATTGTCAGGAC          | 4  |
| wt-168120-168240 | 1397 | CACCTCCAGGTGCGCTAGGTTTTGAGAGCAGAGTGGGGTCCGTCGCCGGCTCCACTCAGAGCAGGTGGTGTCTGCCCTCGTTGGAGTTAGAGTCAAGTTCATGCCAGAATCATCGG    | 4  |
| wt-168240-168360 | 1398 | TAGCTTGTGAGGGTGCAGGAGGGAGTCACTGTTGGTGTTCATCACTGTGTCGTTGCCATGTAATACATCCAGATTAAAATCGCCAGAAACAGGAGGCAAAAGGAGATCAACCA       | 4  |
| wt-168360-168480 | 1399 | ATAGAGTCCACAGTTTTGTTGATAGTAGAGCAATAATGAGCAGGATGAGGTCTAGGAAGAAGGCTAGGAAGAAGGCCAAAAGCTGCCAGATGGTGGCACAAGTCCGACAGCATCT     | 4  |
| wt-168480-168600 | 1400 | CCAATAAGTAGATCCAGATACCTAAGACTGCGTTGAAAAAGAGTGTAGGGTGGAAAAGTGGGGTGTGGTAAATAATCTCAGGGAATGTAGATCTTCAAGTAAGCACCCGAA         | 4  |
| wt-168600-168720 | 1401 | ATGAACAGCACAATCCAAGGAACAATGCCTGTCCGTGCAAAATCCAGAGAGCGATGAGCAGGAGGTGACTGGGAAAGAGAGAAAGTGCCTTAGAGAAGGAAGAGTAAGGAAAGGG     | 4  |
| wt-168720-168840 | 1402 | GGTGTGGGCAAAAGGTGTAATACTTACTCATCAGTAGGAGTATACAAAGGGCTCCAAGTGGACAGAGAAGGTCTCTCTGAAGATAAAGATGATCAAAATATAATTATAAGCATGAGA   | 4  |
| wt-168840-168960 | 1403 | GCAAAGGAATAGAGGACAAAGGAGGCTCCTCCAGTCCAGTCACTCATAACGATGTACAGCCAAAACAGTAGCGCCAAGAGGAGGAGAAGGAGAGCAAGGCTAGGGAAGAGGAGGGGG   | 4  |
| wt-168960-169080 | 1404 | GTCCTCGAGGGGGCGTCCGGGGCCCGTGGGCCCTCTCAAGTCTGTTCATCTCAGGCAGTGTGTGAGGAGCAAGGAGTGTAGGAAAGAGGGGGCAGAGCAGTGTGAGAGG           | 8  |
| wt-169080-169200 | 1405 | CTTATGTAGGGCGGCTACGTACAGATAACCGTGTCTTGGGATGTAGGCCCGGGGGATTGGGGGTTGCCCGGAGGCAGTACGGGTACAGATTCCGAAAGCGGGGCTGTGTG          | 4  |
| wt-169200-169320 | 1406 | TGCATGTAAGCGTAGAAAGGGGAAGTAGAAAGCGTGTGTTGTTGTAAGAAAGCGGGTCCCGGGGGCAAGCTGTGGAAATCGGGTGGCCAAGTGAACAGGAAATGAAAGGCAAGTGC    | 4  |
| wt-169320-169440 | 1407 | GGCAATCAGAAGGGGAGTGCAGTGTGTTGGAAAGCGCAGTGAATCTGCACAAGAGCGCGGGCGGCAACGTTGGGAGTGTGTCGGCAGGCGGGAGCCGTGCTTAGGG              | 4  |
| wt-169440-169560 | 1408 | GGGTTCAAGTGAGGCAAGGCTGTGGGTAAACCTAGGGGAGGGGGTAGGCGGCTAAGAGGCTAAGGTCGCGGGTGAACAGCAGCAGCGGCAATGGAAATTTAGAAATGAG           | 4  |
| wt-169560-169680 | 1409 | GTGGCGGATTCAGGCGAAAAGGTTGGGGCTGCGCAGTGTGAGGCGAGCGGAAAGTCTGCGGCTGTGGGGATGGGGGCGCGCATCTCTGAAAAGTGGAGGGGGCG                | 8  |
| wt-169680-169800 | 1410 | TGGCCCTCCCGCGGCCCCACGGCCCGCAGACAGCGCAGTACGCGCGCGGGGCTACGGGCTCGGGGCTCGGGGCTCCGGGCTCCGGGCTCGGGGCTGGCGCGGACGTTTC           | 4  |
| wt-169800-169920 | 1411 | CGGGATCGGGGGTGGGGGGCGCCGCGCGGCGAGCCATGCGTACCGTGTAGGAGGGGCGGCGCAGGAGGTTGTTGTTGGGGGCGGAGCGGGGGCGCGCGGGAGCCT               | 12 |
| wt-169920-170040 | 1412 | GCACGCCGTTGGAGGTGAAATGACAGGGGGCGGGACAGAGGGGCTCGCGCCCGGGCGCCAGCCAAAGCCCAAGGGGGCGGGAGCGGGCAATGGAGCTGACGAAGGGCC            | 8  |
| wt-170040-170160 | 1413 | CCAGGGCTGACCCCGCAACGTGACCCGGGGCTCCGGGTGACCCAGCCAAGCGTGACCAAGGGGCCGTGGTGACACAGGCAACCTGACAAAGGCCCCAGGAAAGACCCCGGG         | 8  |

|                  |      |                                                                                                                        |    |
|------------------|------|------------------------------------------------------------------------------------------------------------------------|----|
| wt-170160-170280 | 1414 | GGGCATCGGGGGTGGGGCATGGGGGCCGCGCATTCCTGAAAAAGTGGAGGGGGCTGGCCTTCCCCCGGGCCCCCAGCCCCCGCACAGAGCGGCGTACGGCGGGCGGGCGGC        | 12 |
| wt-170280-170400 | 1415 | GGGGGGTCCGGGTCGCGGGCTCCGGGGCTCGCGGGCGTGGATGGCGCGACGTTCCGGGATCGGGGGTGGGGGGCCCGCGCGGGCGCAGCCATGCGTGACCGTATGAGGGG         | 12 |
| wt-170400-170520 | 1416 | GCAGGGTCGAGGGGTGTGTCTGGTGGGGCGGGAGCGGGGGCGGGCGGGAGCCTGCACGCCGTTGGAGGGTAGAATGACAGGGGGCGGGGACAGAGAGCGGTCCGCCCCCGGCC      | 12 |
| wt-170520-170640 | 1417 | GCGCCAGCCAAAGCCCAAGGGGGCGGGGAGCGGGCAATGGAGCGTGACGAAGGGCCCCAGGGCTGACCCCGGCAAACTGACCCGGGGCTCCGGGTGACCCAGCCAAGCGTACCAA    | 8  |
| wt-170640-170760 | 1418 | GGGGCCCGTGGGTGACACAGGCAACCTGACAAAAGGCCCCAGGAAAGACCCCGTGGGGCATGGGGGGCCCGCATTCTGGAAAAAGTGGAGGGGGCTGGCCTTCCCCCGGGGCC      | 8  |
| wt-170760-170880 | 1419 | CCAGCCCCCGCACAGAGCGGCTACGGCGGGCGGGCGGGGGTGGGCTGGGCTCCGGGGTGGGCGGGTGGATGGCGGGACGTTCCGGGATCGGGGGTCCG                     | 12 |
| wt-170880-171000 | 1420 | GGGGCGCGCGGGGCGAGCCATGCTGACGTTAGAGGGGCGAGGTTCCAGGGGTGTGTCTGGTGGGGCGGGAGCGGGGGCGGGCGGGGAGCCTGCACGCCGTTGGAGGGTAG         | 12 |
| wt-171000-171120 | 1421 | AATGACAGGGGGCGGGACAGAGGCGGTGCGCCCCCGCGCGCCAGCCAAAGCCCCAGGGGGCGGGAGCGGGCAATGGAGCGTGACGAAGGGCCCCAGGGCTGACCCCGCAA         | 12 |
| wt-171120-171240 | 1422 | ACGTGACCCGGGGCTCCGGGTGACCCAGCCAAAGCGTACCAAGGGGCCGTTGGGTGACACAGGCAACCTGACAAAAGGCCCCAGGAAAGACCCCGGGGGGATCGGGGGTGGGGC     | 8  |
| wt-171240-171360 | 1423 | ATGGGGGGCGCGCATTCCTGAAAAAGTGGAGGGGGCGTGGCCTTCCCCCGGGCCCCAGCCCCCGCACAGAGCGGCGTACGGCGGGCGGGCGGGGGTCCGGGTCCGCGG           | 12 |
| wt-171360-171480 | 1424 | GCTCCGGGGCTCGGGCGGTGGATGGCGCGGACGTTCCGGGATCGGGGGTGGGGGGCGCGCGGGCGCAGCCATGCGTGACCGTGTATGAGGGGCGAGGTCGACGGGGTGT          | 12 |
| wt-171480-171600 | 1425 | GTCGTGGGGCGGGAGCGGGGAGCGGGGCGGGGAGCGTACGGCGGGTGGAGGGTAGAATGACAGGGGGGGGACAGAGGGGGCGGGCGGGCCCGCCAGCCAAAGGCCCAA           | 12 |
| wt-171600-171720 | 1426 | GGGGGGCGGGAGCGGGCAATGGAGCGTGACGAAGGGGCCAGGGCTGACCCCGCAAACTGACCCGGGGCTCCGGGTGACCCAGCCAAGCGTGACCAAGGGGCCGTTGGTGACACA     | 8  |
| wt-171703-171823 | 1427 | GGCCCGTGGTGACACAGGCAACCTGACAAAAGGCCCCAGGAAAGACCCCGGGGGCATGGGGGGGTGTGGCGGGGGCATGGGGGGTCCGATTCGCCCTTATTGCCCTGTTT         | 8  |
| wt-30-150        | 1428 | TTCTCTTTCGCCGTTCTCTTCTTAGTAGTAATCCAGTATGCCTGCTGTAATTGTTCGCCCTACCTCTTTTGGCTGGCGGCTATTGCCGCTCGTGTTCACGGCCCTAGTTAGTAC     | 4  |
| wt-150-270       | 1429 | CGTTGTGACCGCCACCGCTTGGCCCTCTACTTCTACTCTTGGCAGCAGTGGCCAGCTCATATGCCGCTGCACAAAGAACTGCTGACACCGGTGACAGTGTCTACTGCGGTGTGCAC   | 4  |
| wt-270-390       | 1430 | TTGTGAGTACACAGCACCATTTACAATGCATGATGTTCTGGAGATTGATCTGTCTTAAACAGTTCACTTCCCTCGCTTTTCTCCTCAGTCTTTCGCAATTCGCTAACATGGAGATTGA | 4  |
| wt-390-510       | 1431 | GGACCCACCTTTAATCTCTTCTGTTTGCATTGCTGGCCGACGTGGCGGACTACAAGGCATTTACGGTTAGTGTGCTCTGTTATGAAATGCAAGTTTGACTTCATATGATGCCTTG    | 4  |
| wt-510-630       | 1432 | GCATGACGTCAACTTTACTTTTATTCAGTCTTGGTGTGCTTGTGCTCTGATACTAGCTACAGAGGAGATGGCCCGTTTACTGTTTGTGGCGCATCATGTTTTGGCATGTGT        | 4  |
| wt-630-750       | 1433 | ACTTGTCTCATCGTCGACGCTGTTTTGACAGTGAAGTCCCTCCTTGGAGCTGTAAGTGTGTTTCCATGACGCTGCTGCTACTGGCTTTCGCTCCTGCTCTCGCCAGGGGGCCT      | 4  |
| wt-750-870       | 1434 | AGGTACTCTTGGTGACGCCCTTTAACAATGGCAGCAGTAAGCCACAGTGTGACATTCCTGCTTTTGGCCACATGTTTCTGGACACAGGACTAACCATGCCATCTCTGATTATAG     | 4  |
| wt-870-990       | 1435 | CTCTGGCACTGAGCGTCACTGATTTGGGCACACTTAAGTACACACTTGCCTTCTCATGCTCTTGGACACTTGGACACTTGAAGTTTTCCCTTCTTAACTCACTTGTCTTTT        | 4  |
| wt-990-1110      | 1436 | GTAATCGCAGCTCTAACTTGGCATCTTTTTACAGTGGTTCCTGATTGCTCTTCTGCTCTTATGTCCTACTGAGCAAGATCCTTGGCAGCACTGTTCTATATGCTCTCGCACT       | 4  |
| wt-1110-1230     | 1437 | CTTGTGCTAGCCTCCGCGCTAATCGCTGGTGGCAGTATTTGCAAAACAATCAAGAGTTAAGCAGCACTGAATTTATACCAGTGAGTATCTATTGTTACTCCTGTTAGTTGAA       | 4  |
| wt-1230-1350     | 1438 | GAAAAACAAGCTATTGGATTGTAACACACATTTTACGCTTTGTCCTTAGATTTGTTCTGCATGTTAATTAAGTGTGCTGCTGGCACTCTTCAATCTTGCTATCTGACCAAGTGGGGC  | 4  |
| wt-1350-1470     | 1439 | AGTGGAAATAGAACATACGGTCCAGTTTTATGTGCTCGGTGGCCTGCTCACCATGGTAGCCGGCGCTGTGGTGGTACCGTGATGTCTAACACGCTTTTGTCTGCTGGATTCTTACA   | 4  |
| wt-1470-1590     | 1440 | GCAGGATTCCTGATTTTCTCATTGGTAAGTGTGACACCAACAGGTGTGGCTTGTATGTCACCGTCTGACACATGACTACATGGGTTTGGCTTTTGTAGGCTTTGCCCTTTTGGG     | 4  |
| wt-1590-1710     | 1441 | GTCATTAGATGCTCCGCTACTGCTGCTACTACTGCTTACACTGGAAGGTGAGGAGCGCCACCACCCCATATCGCAACACTGTATAAAGGTAAGTATTATAAATTTAGAGACACT     | 4  |
| wt-1710-1830     | 1442 | ATCACGTGTAACCTGACGTGCAAGGATGGAAGAGAGGGGCGAGGAAACGCAATGCCGTTTGGCCGATGGGGGGCCGTTATTATGGTAAGGCTCTCGGCAAGATGGAGAGGCAAA     | 4  |
| wt-1830-1950     | 1443 | CATACAGGAGGAAAGGCTATATGAGCTACTCTGACCCAGCCTCCGCGCTCGGCTAGACCCGGGGCCCTGATTGCTGAGAACCTGCTGCTAGTGGCGCTGCGTGGCACAACAACGA    | 4  |
| wt-1950-2070     | 1444 | TCCCAGGCCTCAGCCTCAGGAGAGGGCCAGAGAAGTGGCCCTGTTGGCATTCTACTAGGAAACGGCGAGCAGGGTGAACACTTGGGCACGGAGAGTGCCTGGAGGCCTCAGGCAACAA | 4  |
| wt-2070-2190     | 1445 | CTATGTGATGCTACGGACCACTGGATGGCAAGGCCTCCACATGGTCCGCGGAAATCCAGCAATCTCTGCACTCTGGCGCCACGTACGTGCTTCGCTGGAGATGGGACAGCA        | 4  |
| wt-2190-2310     | 1446 | GTTTGGCTTCGAGGTGCATAGAAGCCGGCCCTCTCCGTCAGTTCCAGGCCATCACTACCTTGTCTGTTTTGACAACGCCCTTCGCAAGTACGATTCCGGCCAGGTGGCGGGCGCTT   | 4  |
| wt-2310-2430     | 1447 | CCAGAGGGCCCTTCTGGTGGCGGGCCAGAGACCGCTGACACGAGGCCGGACCTCCGCAAGCTGAATGAGTGGGTGTTTGGTGGCAGGGCTGCTGGTGGCAGACAGTGGCCGACGAGCT | 8  |
| wt-2430-2550     | 1448 | AAAGATCGTGTCCGCGCTGCGAGACACTTACTCGGGCCACTTGGTCTTACGCCACGGAGACCCCTGACACATGGAAGGTGTTGAGCAGGGACACACAGCCGCTCATAGTTGGAGCA   | 4  |
| wt-2550-2670     | 1449 | CGGATTCAATCATGCCGCGGGACCATCCAGGCCAACTGCCACAGCTGTTATGAGACGCCAGCACCCCGGCTCTTCCCTCGTTAATGCAATAGCATCATCGCTGGCTGGTACTA      | 4  |
| wt-2670-2790     | 1450 | CCAGACCGCCACCGCCCCGGAGCAGATGCCAGGGCGGGCGCCGGCCCAACAGGCCTTTACAGCACGGCGGGCGCTGAATGCCATGCCAAAAGCGGGTGGCGGCTGGCCGGCTT      | 8  |
| wt-2790-2910     | 1451 | CTACAGGACCATCAACGCCACGCTCAAGGGAGGAGAGGGCTACAGCCCACTATGTTTAAAGGGGAGCTGGGGCCATCAAGCACAGGCACTTGACACTGTGAGTATGACTACGGCCA   | 4  |
| wt-2910-3030     | 1452 | CTATCTATAATGTTGGGGCATTCCAGCCATGGAGCGGACTGACGGCCCTCCGTGCCCTACGCCAAAGTTTACATGGGCACAGCGGGCGTGCAGACGGCCCTCGAGCTGTTCTCGGC   | 4  |
| wt-3030-3150     | 1453 | CCTGTACCCGGCCCGTGCATCTCGGGCTACGGCGGCCCCCGGGCCCAAGTGTGATGAGCATCTGGGGTCCCTAGTTCAAAAGGGGGTCTGCTGTTGTTCTGCTCACCTACC        | 8  |
| wt-3150-3270     | 1454 | GGATGATGTTAAGGACGGGCTCGGAGAAATGGGGCCGGCCAGGGCCACGGGACCTGGAATGAGCAGATTTGTCAGCAGCTACTTCTCAACCCCGCCTGTTCAACGCTTTCATTACAGT | 4  |
| wt-3270-3390     | 1455 | GAGGCAGCGAGGGGAGAGATCAACGGCCGTACCGTCTCAAGCGCTCGGACGCGCATGCGATGCGAGGCTGCCAGCACTATGCTGGGCTCCACGGTTCCTCCGTTGGTGGACTCAA    | 4  |
| wt-3390-3510     | 1456 | CTTTGTCAACGACCTGGCGTCCCGGTTCCACCGCGGAGATGATGGATGTTTCTCCCTCTTCCAGCTGGAGTTTTCCCGGATTCAGAGAGGGGCAAGTTCCTCCGGTACCCTT       | 4  |
| wt-3510-3630     | 1457 | AGATGTGGACGAGAGCATGGACATCTCTCCGTTACAGAGTTGCCCTGGCTCTCGCTGGAGTCTGCTCACAAAGCATCCTGTACACCCACCGTGGGAAGCAAGGACACTTGGTCAG    | 4  |
| wt-3630-3750     | 1458 | GCACACGGACAGGGTACGGGAGGACGCTGGCACAGCAGCCGGGTAGTCCCTGGACCTGCCGCTGGCGACTACGCTTCTGTTGCCACAGTCAAGTCTGGACAGGCCGGTGG         | 8  |
| wt-3750-3870     | 1459 | GGCTCCTCCCTTCCCTATCGTACCTGGGATCGAATGACAGAGAAGTGTCTGCTCCGCAAAACCGGGCGAGAGAACGTTAAGGTTTACAGTACCGTATTACATTGGGAGAACAGGG    | 4  |
| wt-3870-3990     | 1460 | GTACAAAGTCTCGTTGGATCTGAGGGAGGGAACAGGCTGGCAATGGCTGAGGCGCTGCTGAACGCGCATGTGCCCAATCTTGGATCCGGAAGACGCTTGTCTCACCTCGCATACA    | 4  |
| wt-3990-4110     | 1461 | CCTGGATCCGCGCCGGCAGACAACTTGGCCGTGATGGAGCTATGACGGCGGCGAGTACGCGGCTGGCCTGGCGTGAAGTCTGACCTTGGCTCGCCCTCTCGCCAGACCGG         | 8  |
| wt-4110-4230     | 1462 | CTCGTCCCGCTCAACTTCATGACCTGGTGGCCTCTGCTCCGCCCCAGGGAACTTCCGGTCTGATCACGCCAGTCTCAGAAGACGGGCACTTCCCTGATTCCGGTGGCTTG         | 4  |
| wt-4230-4350     | 1463 | CGGGGATGGCAAGATCCAGGGAGGGTCTGTTTGGACGCTCTTACGACGTGGCCACGACCCACGGGACCCGAGGCGTTGCTCTGAAGAACTCTTCCGGGACGTCAGCAGCT         | 4  |
| wt-4350-4470     | 1464 | GGTCAAGAGCGGCATCGTCTGTCAGGGCATGACATCAGCGACGGGGCCTGGTACCTGCTGGTGGAGATGGCCCTGGCCGGGACGGGGAGTGACCATCACTATGCCGTTGGCCTC     | 8  |

|                |      |                                                                                                                                |   |
|----------------|------|--------------------------------------------------------------------------------------------------------------------------------|---|
| wt-4470-4590   | 1465 | CGACTACCTCCCGGAGATGTTTGCAGAGCACCCCGGCTGGTGTGGTGGAGTGGAGGAGCGCAGCGTGGGTGAGGTGCTGCAGACCTGCGCTCCATGAACATGTACCCGGCAGTCTCGG         | 4 |
| wt-4590-4710   | 1466 | TCGAGTGGGCGAGCAAGGTCAGATCAAATGTTTGGAGTGCAGCAGGCCAGAGACGGTGTTCGCGCAGTCCGCTGCCCTGCTGCTGGGAACCTGGTCATCCTTTGCCAGCGAGCAGTA          | 4 |
| wt-4710-4830   | 1467 | CGAGTGCCTGCGACCAGATCGGATTAACCGGTCCATGCACGTGTCCGACTACGGCTATAACGAAGCACTGGCAGTCTCCCCGTTGACAGGAAAGAATCTCAGCCCACGCCGGTGGTGAC        | 4 |
| wt-4830-4950   | 1468 | AGAGCCTGACCCACGATGTGAGGTGGCCGTGCTATGCGCCCCGGGCACCAGGGGCCATGAAAGCCTCCTGGCGGCCCTCACGAATGCCGGATGCCTGTGCCGACGGGTGTTCTTCGCGA        | 8 |
| wt-4950-5070   | 1469 | GGTTAGGGACAACACGTTCCCTCCGCAACTACGTGGGTCTGGCCATCGGAGGAGTTCATGGGGCCAGGGACTCTGCCCTGGCAGGGCCGTGCCACCTGGCGCTGATTAATCGTTCCCCCG       | 4 |
| wt-5070-5190   | 1470 | CCTGCGTGAGCTATTCTAAAGTTCCTCAACAGGCAGATACGTTCTGCTGGCTGGGGAGTCCAAAGTTCGGCTGGCCCTGGGGCCGTGGGGTCAACAGATAATCCACC                    | 4 |
| wt-5190-5310   | 1471 | CGCCCTGGCGTGGAAGTTAATGTCCAGAGATCACTCTGATTTCCGCCCCCAAGCCCAATGTGCATAATGGTGTGAGTCCAGCTGGCTGAACATTAGCATGCCCGGACCCAGCATGTGAT        | 4 |
| wt-5310-5430   | 1472 | GCTGCGTGGCCTCCGGGGTGGTCTGCTGCCCTTGTGGGTGCAAGGCTCGTGCCTGGCCCTGCAATTTACTAACCTCGGGATGCCATATGTTTTGCAGAATGCCACCAGATCGCCTGCCA        | 4 |
| wt-5430-5550   | 1473 | CTTCCACAGCAATGGCAGGATGCCCTGGCGCTTGTGCTATGAATTATCCAAGAAACCCACGGGAGCAGGGCAACATTGCAGGGCTCTGTTACCGCGATGGTGTGATCTGGCTCTCTGTG        | 4 |
| wt-5550-5670   | 1474 | TGACCCCTCACTTTGTACAGACTTTTGGCAATGGGAGCACATTTCCCCCGCTTTGGGCACCCACGGGGTGTCCCCCTGGACACTTATGTTTCAAGCAGCTCACCTATGGTCACTCAG          | 4 |
| wt-5670-5790   | 1475 | GCACGGTCCGCCCCTCGAGTGACCAGTCACTTCCAGACTATGCATACACTGAATTTAGCCTGATATTGCCCTTAGCCCCGGGCCAGCCCTCTCAGAAAATCTGCATGGAGAAGC             | 4 |
| wt-5790-5910   | 1476 | TGGACGTGAACCTCCCCCAAGCTGTGGCTGATTTACAACACTACAATAAACCCAATGTGCATAATGGTGTGAGTCCAGTACTTTGTGTCCATAAAAATGCAACAATAAGAAGT              | 4 |
| wt-5910-6030   | 1477 | GAAACCTCAGTCAAGGACATTAACCTCAACCACAAAATGGGGTTGGAGAAAGTAAACACATATACTGGAGATGATTTCATGGGCTGGGGTTCCCGGACAATACACCCATCTGGAGTT          | 4 |
| wt-6030-6150   | 1478 | CAACCTAATTACATGGTAGATAAATTAAGAGTCCCTCCTCACACTCGAACTATGGCAGACATTTATAAGATAACGAGGAGAGATGAGGTGAGGGCAGAGGACATTTGGCAGGTGTGG          | 4 |
| wt-6150-6270   | 1479 | GCCACGGGGCAGCTGGCCATATCCCCCGCACTACAGAAAGTGAAGCAAGTGAAGGGCTCGGAAGGCAGGGGGCCTAGCAATGTACACAGTAAATGCCACCAGGGCACACACTCAAG           | 4 |
| wt-6270-6390   | 1480 | CGGGGTCTCGGAGCTCCTAGGTGAGACCAGAAAGTCAAGCTGCAAGGTGGATGGCGTGTTCCTGAGGTATCCCCCTACGTGCAGTGTGGGTGATAGAGACCTAGAATGTGTGG              | 4 |
| wt-6390-6510   | 1481 | AAATGACCAAGCGTCCCGCAGCGGGCTCCCAACACGGGTTCCAGAGAGGGTAAAGAGGGGCCATAAAGCCCAGGGTGTAAAACACCGACCAGCCAGATGGCACACGTGGGG                | 4 |
| wt-6510-6630   | 1482 | GAAATGAGGGTTAGCATAGGCAACCCCGCCTACACACCACTATAGCAAAACCCCGCCCGTACGCGTACGTAGTCTGCTTGAGGAGATGTAGACTGTAGACACTGCAAAAACCTCAG           | 4 |
| wt-6630-6750   | 1483 | GACCTACGCTGCCCTAGAGGTTTTGCTAGGGAGGAGACGTGTGTGGCTGTAGCCACCCGTCCGGGTACAGTCCCGGGTGGTGAAGGCGTGTCTGTGGTTGTCTCCAGACTCTGCT            | 4 |
| wt-6750-6870   | 1484 | TTCTGCCGTTCGGTCAAGTACCAGCTGGTGGTCCGGATGTTTGTATCCAAACTTTGTTCATAGGATTATGCATCCATTATCCCGCAGTCCACCTAAACGGGGCTTAACGTTGCATC           | 4 |
| wt-6870-6990   | 1485 | CCAGAAGATGCACGTTAACCCCGCCTACAACCGTGACGTAGCTGTTACCAGCATGTATAGAGTTACGGTTCGCTACATCAACAGGACAGCCGTTGCCCTAGTGGTTCCGGACACCC           | 4 |
| wt-6990-7110   | 1486 | GCCAACCGCTCAGTGGGTGCTACCCAGGTCAGGTCAGGTCCCGGGGAGGAGAGAGGCTTCCCGCCATAGACATTTGCAAGTCAAGGATTTCTCAATCCCTCTGGGAGCAAGGGTATTC         | 4 |
| wt-7110-7230   | 1487 | GGCTTGTCCGCTATTTTTTGTGGCTAGTTTTGCACCCACAACATGTAAGGGCCCGTACCCTACAACACAAAACAATATCTCCCTAACCATCTTTTTGCCAATCAATTTCTGTGAC            | 4 |
| wt-7230-7350   | 1488 | AGGGTTCCTGGACACCCAGTCTTAGTTCAGGTAGACACCCAGTTATGCAGTCCCAATTTCAACCATTTTTAACTCCTGGAATTCTATCATTAAACGGCATGCAGAAAAGGACA              | 4 |
| wt-7350-7470   | 1489 | AGCAGCGAAAATTCACGCCCTTGGGAGGTGGCGGCATATGCCAAAGGATAGCACTCCCACTCTACTACTGGGTATCATATGCTGACTGTATATGCATGAGGATAGCATATGCTACCCGG        | 4 |
| wt-7470-7590   | 1490 | ATACAGATTAGGATAGCATATACTACCCAGATATAGATTAGGATAGCATATGCTACCAGATATAGATTAGGATAGCCTATGCTACCCAGATATAAATTAGGATAGCATATACTACCCAG        | 4 |
| wt-7590-7710   | 1491 | ATATAGATTAGGATAGCATATGCTACCCAGATATAGATTAGGATAGCCTATGCTACCCAGATATAGATTAGGATAGCATATGCTACCCAGATATAGATTAGGATAGCATATGCTATCCAG       | 4 |
| wt-7710-7830   | 1492 | ATATTTGGGTAGTATATGCTACCCAGATATAAATTAGGATAGCATATACTACCCAGATATAAATTAGGATAGCATATACTACCCAGATATAGATTAGGATAGCATATGCTACCCAGAT         | 4 |
| wt-7830-7950   | 1493 | AGATTAGGATAGCATATGCTACCCAGATATAGATTAGGATAGCCTATGCTACCCAGATATAAATTAGGATAGCATATACTACCCAGATATAGATTAGGATAGCATATGCTACCCAGATAT       | 4 |
| wt-7950-8070   | 1494 | AGATTAGGATAGCCTATGCTACCCAGATATAGATTAGGATAGCATATGCTATCCAGATATTGGGTAGTATATGCTACCCATGGCAACATTAGCCACCCGTGCTCTCAGCGACCTCGTGA        | 4 |
| wt-8070-8190   | 1495 | ATATGAGGACCAACACCCCTGTGCTTGGCGCTCAGGCGCAAGTGTGTGAATTTGTCCTCCAGATCGCAGCAATCGCGCCCTATCTTGGCCCCCACCCTACTTATGCAGGTATCCCC           | 4 |
| wt-8190-8310   | 1496 | GGGGTCCATTAGTGGTTTTGTGGCAAGTGGTTGACCCAGTGGTTAGCCGGGTTACAATCAGCCAAGTATTACACCTTATTTACAGTCCAAAACCCAGGGCGCGTGTGGGG                 | 4 |
| wt-8310-8430   | 1497 | CTGACGCGTGCCCCCACTCCACAATTTCAAATAAAGAGTGGCCACTTGTCTTTGTTATGGGCCCATTTGGCGTGGAGCCCGTTAATTTTCGGGGGTGTTAGAGACAACCAAGTGGAG          | 4 |
| wt-8430-8550   | 1498 | TCCGCTGCTGTCGGCGTCCACTCTCTTCCCCTGTACAAAATAGAGTGAACAACATGGTTCACCTGTCTTGGTCCCTGCCTGGGACACATCTTAATAACCCAGTATCATATTGCACT           | 4 |
| wt-8550-8670   | 1499 | AGGATTATGTGTTGCCATAGCCATAAATTCGTGTGAGATGGACATCCAGTCTTACGGCTGTGCCCAACCCATGGATTTCATTGTTAAAGATATTCAGAATGTTTCATTCTCACT             | 4 |
| wt-8670-8790   | 1500 | AGTATTTATGCCCAAGGGGTTTTGTAGGGTTATATTTGGTGTATAGCAACAATGCCACCCTGAACCCCGCTCCAAATTTTATCTGGGGCGTCACTGAAACCTTGTTCGAGCAC              | 4 |
| wt-8790-8910   | 1501 | CTCACATACACTTACTGTTCAACTCAGCAGTATTCTATTAGCTAAACGAAGGAGAATGAAGAAGCAGGCGAAGATTACAGAGATTTACTGCCCGCTCTTGTATCTTACGACCTG             | 4 |
| wt-8910-9030   | 1502 | CCCTTGTGACTAAAATGGTTCACCTACCCTCGTGGAACTCCTGACCCCATGTAAATAAAACCTGACAGCTCATGGGTGGGAGATATCGCTGTTCTTAGGACCCCTTTACTAACCCATA         | 4 |
| wt-9030-9150   | 1503 | TCGATAGCATATGCTTCCCGTGGGTAACATATGCTATTGAATAGGGTTAGTCTGGATAGTATATACTACTACCCGGGAAGCATATGCTACCCGTTTAGGGTTAACAAGGGGGCCTTAT         | 4 |
| wt-9150-9270   | 1504 | AAACTATTGCTAATGCCCTCTTGAGGGTCCGCTTATCGGTAGCTACACAGGCCCTCTGATTGACGTTGGTGTAGCCTCCCGTAGTCTTCTGGGCCCTGGGAGGTACATGCCCC              | 4 |
| wt-9270-9390   | 1505 | AGCATTGGTGAAGAGCTTACGCCAAGAGTTACACATAAAGGCAATGTTGTTGAGTCCACAGACTGCAAAAGTGTCTCCAGGATGAAGGCCACTCAGTGTGGCAAAATGTGCACATC           | 4 |
| wt-9390-9510   | 1506 | CATTTATAAGGATGTCAACTACAGTACAGAGAACCCTTTGTTGTTGGTCCCGGGGTCACATGTGGAACAGGGCCAGTGGCAAGTGTACCAACCAACTGAAGGATTACATGCA               | 4 |
| wt-9510-9630   | 1507 | CTGCCCGCGGAAATACGTCTACCCAGGAACCCGAAACAGTGTTCGAGAAAGCTGTAAATAAAGAGCTGAAACAGCCCGTGAACCTGCCCACTGTGCAATGCAGCTTTAGCCATGCCATGCTC     | 4 |
| wt-9630-9750   | 1508 | TATAAATCACTTCCCTATCTCAGGTAGGCCTGCACACCTTAGGTATGGAGCGAAGGTTAGTGGTCACTCTGCAGTGCCTGGTGTCTTTACTTGGCACCTGAGTGTGGAGGTACAGACC         | 4 |
| wt-9750-9870   | 1509 | AATGTGACAATTTCCCAAATTTGAGGGACCTAAGAGATGCCTCAGTCTGTTAAACCTTTTCCAGACAAAGGACGAGGTAGATAACCTTTGTCTCAAGGAGTCTCTGCTAGAGG              | 4 |
| wt-9870-9990   | 1510 | ACTTTAAGGGCTACCTTGGATGCCAGGCGCTGTCAGAATGATCCAATTCACCTGGAGGAAGTATGCCACAGGCTGAAAACAGGACCCCTGAAGCCAAAGACCATGCAATTTCTTGG           | 4 |
| wt-9990-10110  | 1511 | GTGAAAATCTAAAGACCTACGGCTCCCGCTGCGCAGGTGCCACAGTTCTCGCGTGTGAGAACAAGAGTAAAGCTGTGGAACAGATAAAAAATGCCTTTAAACAAGCTGCAGGAAAAAG         | 4 |
| wt-10230-10350 | 1512 | AACCCCGCTTTCGACTGTCAATTTACAATAAATGAACCTTTTATCTGTTGCTTCTTGGCTGTTCTTGGCCAGTACCTTCTGTGTTTCCCGCAGGTAACCTTCTTCCCGCGGAAAAGAATAGCTTCT | 4 |
| wt-10350-10470 | 1513 | GCAGAAGGCCATTGACGCAAGTTTTCGCGTGGGATTAACCGACCCAGCCACTTACAGCAATTTTGTCTAGGTCATCTTAGGAGCCCGGCCAGCATTTCTACAGCTTAAACGGGAA            | 4 |
| wt-10470-10590 | 1514 | GAGAAGTGGGAGGGCACTCGCCCACTAACCTTAACACCTGCAGCTACAAGTACACTAGCTGTTTGTCTATTCCGCACTAGAGACCAGCAAGATGCCAAACTACAGGCCCGGGCC             | 4 |
| wt-10590-10710 | 1515 | AGGCCTGCAGGGCAGACGTTAGGCTGACAAGGGGACAAGTGTGGCAGGTGGCGGGAAGGGGCACAAGAATCCCGCGCAACTGACCAACCGTCCACCCCGCCTCAAGCGTCCGGGA            | 8 |





|                |      |                                                                                                                         |    |
|----------------|------|-------------------------------------------------------------------------------------------------------------------------|----|
| wt-16830-16950 | 1567 | TTTTGCCCCCTGGCGGCCAGCCGACCCCGGGCGCCCAAACTTTGTCCAGATGTCCAGGGTCCCGAGGGTGAAGCCAGCCCTCCCGCCCTGTCCACTGCCCGGTCCCG             | 8  |
| wt-16950-17070 | 1568 | CCAGAAGCCCCAAAAGTAGAGGCTCAGGCCATGCCGCGCCTGTACCAGGCTGCCAAAAGAGCCAGATCTAAGCCGGGAGAGGAGCCCAAGCGGGTGCAGTAACAGGTAATCTCT      | 4  |
| wt-17070-17190 | 1569 | GGTAGTGATTTGGACCCGAAATCTGACACTTTAGAGCTCTGGAGGACTTTAAAACCTAAAATCAAACCTTTAGAGGCGAATGGCGCCATTTTGTCCACGCGCATAATGGCGGA       | 4  |
| wt-17190-17310 | 1570 | CCTAGGCCATAAACCCAGGAAGCGGGTCTATGGTTGGCTCGCTGTCTATCTTTAGAGGGGAAAAGAGGAATAAGCCCCAGACAGGGGAGTGGGCTGTTTGTGACTTACACAAA       | 4  |
| wt-17310-17430 | 1571 | GGTCAGGGCCCAAGGGGGTTCGCGTTGCTAGGCCACCTTCTCAGTCCAGCGCGTTTACGTAAGCCAGACAGCAGCCAAATGTGAGTTCTAGGGAGGGGGACCCTGCCCTGGTATAAAG  | 4  |
| wt-17430-17550 | 1572 | TGGTCTGCAGCTATTTCTGGTGCATCAGAGCCAGGAGTCCACACAAATGTAAGAGGGGTCTTCTACCTCCCTAGCCCTCCGCCCCCTCAAAGGACTCGGGCCAGTTTCTAAC        | 4  |
| wt-17550-17670 | 1573 | TTTTCCCTTCCCTCCCTCGTCTGAAGCCCTGCGCCGACCCACCTTACATCCGCTGACTCCGCGCATCAAAGCTTAGGGGAGACCGAAAGTGAAGCCCTGGACCAACCCCGGGGG      | 8  |
| wt-17670-17790 | 1574 | CCCCCGGTATCGGGCCAGAGGTAAGTGGACTTTAATTTTTCTGCTAAGCCCAACACTCCACACACCCAGGCACACACTACACACACCCACCCGCTCTCAGGGTCCCTCGGACAGCTC   | 4  |
| wt-17790-17910 | 1575 | CTAAGAAGGCACCGTTCGCCAGTCTACCAGAGGGGCCAAGAACCAGACGAGTCCGTAGAAGGGTCTCTGCCAGCAAGAAGAGGAGGTGTAAGCGGTTACCTTCAGGGGTAAGT       | 4  |
| wt-17910-18030 | 1576 | AACCTGACCTTCCAGGGCTCACATAAAGGGAGGCTTAGTATACATGCTTCTTGTCTTTCACAGGAACCTGGGGGCTAGTCTGGTGGGATTAGGCTGCCTCAAGTTGCATCAGCCAGGG  | 4  |
| wt-18030-18150 | 1577 | CTTCATGCCCTCCTCAGTCCCTAGTCCCGGGCTTCAGGCCCTCCGTCGCCCTCCAGAGACCCGGGCTTCAGGCCCTGCCTCTCTCTGTACCTTTTGAACACAGCCCTGGAC         | 4  |
| wt-18150-18270 | 1578 | ACATGTGCCAGACGCTTGGCCCTTGAAGCCCTCGGGTCCCTCGACCCCGGCTCAGCAACCCTGCTGCTCCCTCTGCCACCCAGCCTCCCGCTCCCGCTCCCGCTCCCGCTC         | 8  |
| wt-18270-18390 | 1579 | TGATCCTCCCGGTCCCGAGTAGGGCCGCTGCCCTTGCACCCAGTACCTGCCCTCTTGGCCACGACCCCGGGCCAGGCCACCTTAGACCCGGCCAAGCCCATCCCTGAAGACC        | 8  |
| wt-18510-18630 | 1581 | CACCCGGTCCCTCCGGGGGCGAGAGACAGGAGGGCCCGCCGCGAGCTGGCCCGAGGAGGCGCCGGAGTGGGGCCGGTCCGGTGGGCTGGCCAGCCCGGGTCTGGGAGGCTGGGGT     | 12 |
| wt-18630-18750 | 1582 | GGCAGCCTGCTGTCTCAGGAGGGGCTGCTCCGCGGGTGGCCCTGGGGTAAAGTCTGGGAGGCAGAGGCTCGCCCTAGGCCCGGGGAAAGTGGAGGGGATCGCCCGGGTCTGTTGG     | 8  |
| wt-18750-18870 | 1583 | CAGAGTCCGGGCGATCCTTGAGACCTCCGGGCCGAGCGTCCGCTCAGCCCCCAGACAGACCCAGGGTCTCCAGGCAGGGTCCGGCATCTTCAGGGGCGAGGCTCACCACCA         | 8  |
| wt-18870-18990 | 1584 | CAGGCCCCAGACCCGGGCTCGGCCAGCCGAGCCGACCCGCGCCCGCTGGCGCTCTCGGGGCCAGCCCGGGGTTGGTTCTGCCCTCTCTGTCTTCAGAGGAACCCAGGG            | 12 |
| wt-18990-19110 | 1585 | ACCTCGGGCACCCAGAGCCCTCGGGCCCGCTCCAGGCGCCCTCTGGTCTCCGCTCCCTCTGAGCCCGTTAAACCCAAAGAAATGTCTGAGGGGAGCCACCTCGGGGCCAGGCC       | 8  |
| wt-19110-19230 | 1586 | CCAGAGTCCAGAGGTCCAGGGCACCTCAGGGTCCCTCCCGGGTCCAGGCCAGCCGGAGGACCCCGGACGCCGGCGGCCAGAGCCGGTTCCTCGCCCTTCCCGGGCTTCAG          | 12 |
| wt-19230-19350 | 1587 | AGCCAGGATGTCCCCAGAAAGGACCCAGGGTCCCTCTCTCCCTTCCAGGCCGAGCCTCTCCCTCGCGGAGAGGGGCTCTTTGGGCCCTCAAGTCCAGCCCCAGCAGACCCG         | 8  |
| wt-19350-19470 | 1588 | AGTGGCCCGGATCCCGCCAGCCCTTCTCTCTGCCCTGCTCCTCCCAACCTTCGCTCCACCTAGACCCAGCTTCTGGCTCCCGGGTCCACCAGGCCAGCCGGAGGGACCC           | 8  |
| wt-19470-19590 | 1589 | CGGCAGCCCGGGGAGTCCCTTCCCTTCCCTGGGCTCTCTCCCGCTCCAGCCAGCCCTCAGCTTGCCTCCCAAGCCGGTCCATCAGGCCCGGGGAGCCCGGGGCG                | 12 |
| wt-19590-19710 | 1590 | CCGGTGCAGTCCCGCTCGACCGCCAGTCTCTGCCCTCAGGCAAGGGCGCCAGCTTTTCTCCCGCCAGCTGAGGCCAGTCTCTGTGCACTGTCTGTAAGTCCAGCTCCACG          | 8  |
| wt-19710-19830 | 1591 | CCCGTCCAGGCTCCCGGGCCAGCCTCGTCCACCCCTCCCGAGGTTGACAGGCCCTCTGTCCACCCGGCCATCCCGCCCGCTGTGTCCACCCAGTCCCGTCCAGGGGGACTTT        | 8  |
| wt-19830-19950 | 1592 | ATGTGACCTTGGGCTGGCTCCCATAGACTCCCATGTAAGCCTGCCTCGAGTAGGTGCCTCCAGAGCCCTTTTGGCCCGCTGGCGGCCAGCCCGACCCCGGGCGCCCAAACT         | 8  |
| wt-19950-20070 | 1593 | TGTCCAGATGTCCAGGGTCCCGAGGGTGAAGGCCAGCCCTCCCGCCCTGTCCACTGCCCGGTCCCGCAGAAGCCCAAAAGTAGAGGCTCAGGCCATCGCGCCCTGTCCAC          | 8  |
| wt-20070-20190 | 1594 | AGCCCTGCCAAAGAGCCAGATCTAAGCCCGGGAGGACGCCCAAGCGGGTGCAGTAACAGGTAATCTCTGGTAGTGATTGGACCCGAAATGACACTTAGAGCTTGGAGGACT         | 4  |
| wt-20190-20310 | 1595 | TTAAAACCTTAAAAATCAAACCTTTAGAGCCGAATGGCGCCATTTTGTCCCGCCAGCCGACATAATGGCGGACCTAGCCCTAAAACCCCAAGGAAGCGGGTCTATGGTTCGCGTGC    | 4  |
| wt-20310-20430 | 1596 | TGCTATCTTAGAGGGGAAAAGAGGAATAAGCCCCAGACAGGGGAGTGGGCTGTTTGTGACTTACCAAAGGTCCAGGGCCAAAGGGGTTCCGTTGCTAGGCCACCTTCTCAGTCCA     | 4  |
| wt-20430-20550 | 1597 | GCAGCTTACGTAAGCCAGACAGCAGCCAAATGTGAGTCTAGGAGGGGGACCACTGCCCTGGTATAAAGTGGTCTGCAGCTATTCTGGTGCATCAGAGCCAGGAGTCCACAC         | 4  |
| wt-20550-20670 | 1598 | AAATGTAAGAGGGGTTCTTACCTTCCCTAGCCCTCCGCCCCCTCAAAGGACTCGGGCCAGTTTCTAACTTTTCCCTTCCCTCCCTCGTCTTCCCTCGCCCGGGGCCACCTTCA       | 4  |
| wt-20670-20790 | 1599 | TCACCGTGCCTGACTCCGCCATCAAAGCCTAGGGGAGCCGAAGTGAAGCCCTGGACCAACCCGGCCCGGGCCCGCCCGGATCGGGCCAGAGGTAAGTGGACTTAAATTTTTCTGCTA   | 4  |
| wt-20790-20910 | 1600 | AGCCCAACACTCCACACACCCAGGCACACTACACACACCCACCCGCTCAGGGTCCCTCGGACAGCTCTAAGAAGGCACCCGTCGCCAGTCTTACCAGAGGGGGCCAAAGAACCC      | 4  |
| wt-20910-21030 | 1601 | AGACGAGTCCGTAGAAGGGTCTCGTCCAGCAAGAAGAGGAGGTGGTAAGCGTTACCTTCCAGGGTAAAGTAACTGACCTCTCCAGGGCTCACATAAAGGGAGGCTTAGTATACATGC   | 4  |
| wt-21030-21150 | 1602 | TTCTTGCTTTTACAGGAACCTGGGGCTAGTCTGGTGGGATTAGGCTGCCTCAAGTTGCATCAGCCAGGGCTTATGCTCCCTCCTCAGTTCCTTAGTCCCGGGCTTCCAGCCCTCC     | 4  |
| wt-21150-21270 | 1603 | GTCCCGTCCCTCCAGAGACCCGGGCTTCCAGCCCTGCCTCTCTGTTACCCTTTTAAAGAACACAGCCTGGACACATGTGCCAGACGCTTGGCCCTTAAAGCCCTCGGGTCCCGCTGGAC | 4  |
| wt-21270-21390 | 1604 | CCCGGCTCAGCAACCTGCTGCTCCCTCCTGCCACCCAGCCTCCCGCTCCCGCTCCCTTCCCTGCTGATCCTCCCGGGTCCCGAGTGGGGCCGCTGCCCTTGCACCCAG            | 8  |
| wt-21510-21630 | 1606 | GGCCATTGGGCCAGATTGAGAGACCAGTCCAGGGGCCGAGGTTGGAGCCAGCGGGCACCCGAGGTCCAGCACCAGCCGCTCCCTCCGGGGGACAGACAGGAGGCCCCCGGCGACT     | 12 |
| wt-21630-21750 | 1607 | GGCCCGAGGAGGCGCCGGAGTGGGGCCGGTGGGCTGGGCTGGCCAGCCGGGCTGGGAGGCTGGGGTGGCGAGCCTGCTGTCTCAGGAGGGGCTGGCTCCCGGGTGGCCCTG         | 12 |
| wt-21750-21870 | 1608 | GGGTAAGTCTGGGAGGCAGAGGTCGGCTAGGCCCGGGAAAGTGGAGGGGATCGCCGGGCTCTGTTGGCAGAGTCCGGGATCCTCTGAGACCTCCGGGCCGGACGGTCCGCC         | 8  |
| wt-21870-21990 | 1609 | TCAGCCCCAGACAGACCCAGGGTCTCAGGCAGGGTCCGGCATCTCAGGGGAGCAGGCTCACACCACAGGCCCCAGACCCGGGCTCGGCCAGCCGAGCCGACCCGGCCCGC          | 8  |
| wt-21990-22110 | 1610 | GCCTGGCGCTCCTCGGGCCAGCCCGGGGTTGGTTCTGCCCTCTCTGTCTTCCAGAGGAACAGGGACCTCGGGCACCCAGAGCCCTCGGGCCCGCTCCAGGCGCCCTCCT           | 8  |
| wt-22110-22230 | 1611 | GGTCTCCGCTCCCTCTGAGCCCGTTAAACCCAAAGAAATGCTGAGGGGAGCCACCCTCGGGCCAGGCCAGAGTCCAGAGGTCAGGGGACCTCAGGGTGCCTCCCGGGTCCCA        | 8  |
| wt-22230-22350 | 1612 | GGCCAGCCGAGGACCCCGGAGCCCGGGCCAGAGCCGGTTCCTCGCCCTTCCCGGGCTTCCAGAGCCAGGATGTCCCCAGAAAGGACCCAGGCGTCCCGCTCCTCCCTCC           | 12 |
| wt-22350-22470 | 1613 | CTCCAGGCCGAGCCTCCTCCGCGGAGAGGGCCCTTTGGGCCCTCAAGTCCAGCCACCCAGGAGCCGAGTGGCCGGATCCCGCCAGCCGCTTCTCTGTCCCGCTGCTCT            | 8  |
| wt-22470-22590 | 1614 | CTCCAACCTTCCGCTCCACCTTAGACCCAGCTTCTGGCCTCCCGGGTCCACAGGCCAGCCGGAGGACCCCGGAGCCCGGGCAGTCCGCTTCCCTTCCCGTCCCTTCC             | 8  |
| wt-22590-22710 | 1615 | GCCTCCACCCGAGCCCTCAGCTTGCCTCCCGCCGCGGTCACAGGCCGCGGAGGCCAGCCCGGGCCGGTGTGAGTCCCGCTGCAGCCCGCCAGTCTGCTCCAGGCAAG             | 12 |
| wt-22710-22830 | 1616 | GGCCGAGCTTTTCTCCCGCAGCTGAGGCCGAGTCTCTGACTGCTGTAAGTCCAGCTCCACGGCTCCAGGGTCCCGGGCCAGCCTGTCACCCCTCCCGGAGGTTG                | 8  |
| wt-22830-22950 | 1617 | GACAGCCCTCTGTCCACCCGGCCATCCCGCCCGCTGTGTCCACCTGCTCCGTCAGGGGGACTTTATGTGACCTTGGGCTGCTCCCATGACTCCCATGTAAGCCTGCC             | 8  |
| wt-22950-23070 | 1618 | TCGAGTAGGTGCCTCCAGAGCCCTTTTGGCCCTGGCGGCCAGCCGACCCCGGGCCCGCCAAACTTTGTCCAGATGTCCAGGGTCCCGAGGGTGAAGCCAGCCCGCTCCCG          | 8  |
| wt-23070-23190 | 1619 | CCCTGTCCACTGCCCGGTCCCGCAGAACCCCAAAAGTAGAGGCTCAGGCCATGCGCGCCTGTACCAGGCCCTGCCAAAGAGCCAGATCTAAGGCCGGGAGAGGAGCCCAAG         | 8  |

|                |      |                                                                                                                          |    |
|----------------|------|--------------------------------------------------------------------------------------------------------------------------|----|
| wt-23190-23310 | 1620 | CGGGTGCAGTAACAGGTAATCTCTGGTAGTGATTGGACCCGAAATCTGACACTTTAGAGCTCTGGAGACTTTAAACTCTAAAACTCAAACCTTTAGAGCGGAATGGGCGCAATTTTG    | 4  |
| wt-23310-23430 | 1621 | TCCCCACGCGCGCATAATGGCGGACCTAGCCCTAAACCCCCAGGAAGCGGGTCTATGGTTGGCTGCGCTGCTGCTATCTTTAGAGGGGAAAAGAGGAATAAGCCCCAGACAGGGGAGT   | 4  |
| wt-23430-23550 | 1622 | GGGCTTGTGTGACTTCACCAAAGGTCAAGGCCAAGGGGTTGCGGTTGCTAGGCCACCTTCTCAGTCCAGCGGTTTACGTAAGCCAGACAGCAGCCAATTGTCAGTTCTAGGGAGG      | 4  |
| wt-23550-23670 | 1623 | GGGACCCTGCCCCGGTATAAAGTGGTCTGCAGCTATTTCTGGTCCGATCAGAGCGCCAGGAGTCCACAAAATGTAAGAGGGGGTCTTCTACTCTCCCTAGCCCTCGCCGCCCTCC      | 4  |
| wt-23670-23790 | 1624 | AAGGACTCGGGCCAGTTTCTAACTTTTCCCTTCCCTCCCTCGTCTTCCCTGCGCCCGGGGCCACCTTCATACCCTCGCTGACTCCGCCATCCAAGCCTAGGGGAGACCGAAGTAA      | 4  |
| wt-23790-23910 | 1625 | GGCCCTGGACCAACCCGGCCGGCCCGCCGATCGGGCCAGAGTAAAGTGGACTTTAATTTTTTCTGCTAAGCCCAACTCCACCACCCAGCCACACTACACACCCACCCAG            | 4  |
| wt-23910-24030 | 1626 | TCTCAGGTTCCCTCGGACAGCTCCTAAGAAGTCCCTCCGCGGGCCAGAGACAGGAGGGGCCCCCGGACGCTGCCAGTCCGTAAGAAGGTTCTCGTCCAGCAAGAAGGAGGTTGGTA     | 4  |
| wt-24030-24150 | 1627 | AGCGGTTACCTTCAGGGGTAAGTAACCTGACCTCTCCAGGGCTCACATAAAGGGAGGCTTAGTATACATGCTTCTTCTGCTTTTACAGGAACCTGGGGGCTAGTCTGGTGGGATTAGGC  | 4  |
| wt-24270-24390 | 1629 | CCCTTTTAGAACACACAGCCTGGACACATGTGCCAGACGCTTGGCCTCTAAGGCCCTCGGGTCCCCCTGGACCCCGCCCTCAGCAACCCCTGCTGCTCCCTCCTGCCACCCAGCCTCCC  | 8  |
| wt-24390-24510 | 1630 | CCCCTCCCGTCCCGCTTCCGCTCTGATCCTCCCGCGTCCCCAGTAGGGCCGCTGCCCCCTGCACCCAGTACCTGCCCTCTTGGCCACGACCCCGGCCAGGCCACCTTAGACCC        | 8  |
| wt-24510-24630 | 1631 | GGCCAAGCCCATCCTGAAGACCCAGCGCCATTCTCTGGTAAAGAGCAGAGAAGAAGTAGAGGCCCGGCCATTTGGCCAGATTGAGAGACCAGTCCAGGGGCCGAGGTTGGA          | 4  |
| wt-24630-24750 | 1632 | GCCAGCGGCACCCGAGGTCCAGCACCCGCTCCGCGGGCCAGAGACAGGAGGGGCCCCCGGACGCTGCCCGGAGGAGGCCCGGGAGTGGGGCCGGTCCGCTGGGCTGGCCGA          | 12 |
| wt-24750-24870 | 1633 | GCCCGGTTCTGGGAGGTTGGGGTGGCGAGCCTGCTGTCTCAGGAGGGGCTGGCTCCCGGGTGGCCCTGGGTAAGTCTGGGAGGAGAGGGTCCGGCTAGGCCCGGGGAAGTGGAG       | 8  |
| wt-24870-24990 | 1634 | GGGGATCGCCGGGTTCTGTGGCAGAGTCCGGGCGATCCTCTGAGACCTCCGGGCCCGGACGGTCCGCTCAGCCCCAGACAGACCCAGGGTCTCCAGGCAGGGTCCGGCATCT         | 8  |
| wt-24990-25110 | 1635 | TCAGGGGACAGAGGCTCACACCCAGGCCCCAGACCCGGTCTCGGCCAGCCAGCCGACCCGCGCCCTGGCCCTCCTCGGGGCCAGCCCGGGGTTGGTCTGCCCTCT                | 12 |
| wt-25110-25230 | 1636 | CTGTGCTTTCAGAGGAACAGGGACCTCGGGCACCCAGAGCCCTCGGGCCCGCTCCAGGCGCCCTCTGGTCTCCGCTCCCTCTGAGCCCGTTAAACCCAAAGAATGCTGAGG          | 8  |
| wt-25230-25350 | 1637 | GGAGCCACCTCGGGGCCAGGCCCCAGAGTCCAGAGTCCAGGGCACCTCAGGGTGCCTCCCGGGTCCAGGCCAGCCGGAGGGACCCCGGACGCCCGGGCCCGCCAGAGGCCGTT        | 12 |
| wt-25350-25470 | 1638 | CCTCGCCCTTCCCGGGTTCAGAGCCAGGATGTCCCCAGAAAGGACCCTAGGCGTCCCTCTCCTCCCTCCAGGCCGAGCCTCTCCCTCGCGGAGAGGGGCTCTTTGGGCCCT          | 8  |
| wt-25470-25590 | 1639 | CAAGTCCAGCCACCCGAGACCCGAGTGGCCGGATCCCCACCGGCCCTTCTCTGTCCCTGCTCCTCCTAACCTTCGCTCCACCCTAGACCCAGCTTCTGGCCTCCCGGGT            | 8  |
| wt-25590-25710 | 1640 | CCACCAGGCCAGCCGAGGACCCCGCGAGCCCGGGCAGTCCGCTCCCTCCTCCCTGGCCTCTCTTCCCGCCTCCACCCAGGCCCTCAGCTGCCCTCCACCCAGGGTCCATCAG         | 8  |
| wt-25710-25830 | 1641 | GCCCGCGGAGGGACCCCGCGCGCCGGTGTGAGTCCCGCTGCAGCCCGCTCTCTGCTCCAGGCAAGGGCGCCAGCTTTCTCCCCAGCCTGAGGCCAGTCTCCTGTGCACT            | 8  |
| wt-25830-25950 | 1642 | GTCTGTAAGTCCAGCCTCCAGCCGCTCCCGGGCCAGTCCCTCCCTCAGCCAGGCTGCACAGGCTCTGTCCACCCGGGCTCCCGCCCGCCCTGTCCACCCGGGCTCCCGCCAGC        | 8  |
| wt-25950-26070 | 1643 | CCAGTCCCGTCCAGGGGGACTTTATGTGACCTTTGGGCTGGCTCCCATAGACTCCCATGTAAGCCTGCCTCGAGTAGGTCCTCCAGAGCCCTTTTGGCCCTGGCGCCAGCC          | 8  |
| wt-26070-26190 | 1644 | CGACCCCGGGCCCGCCAAACTTTGTCAGATGTCAGGGTCCCGAGGGTGAAGGCCAGCCCTCCCGCCCTGTCCACTGCCCGGTCCCGCCAGAACCCCAAAAGTAGAGGC             | 8  |
| wt-26190-26310 | 1645 | TCAGGCCATGCGGCCCTGTACCAGGCCGTCCAAAGAGCCAGATTAAGGCCGGGAGAGGAGCCCAAGCGGGTGCAGTAACAGGTAATCTCTGTAAGTATTGGACCCGAAATCT         | 4  |
| wt-26310-26430 | 1646 | GACACTTTAGAGCTCTGGAGGACTTTAAACTCTAAAACTCAAACCTTTAGAGGCGAATGGGCGCCATTTTGTCCACGCGCGCATAATGGCGGACCTAGGCCTAAAACCCCGGAAG      | 4  |
| wt-26430-26550 | 1647 | GGGGTCTATGTTGGCTGCGTCTGCTATCTTTAGAGGGGAAAAGAGGAATAAGCCCCAGACAGGGGAGTGGGCTGTTTGTGACTTACCAAAGCTCAGGGCCCAAGGGGTTGCGG        | 4  |
| wt-26550-26670 | 1648 | TTGCTAGGCCACCTTCTCAGTCCAGCGGTTTACGTAAGCCAGACAGCAGCCAACTTGTCAAGTCTAGGGAGGGGAGCCACTGCCCTGGTATAAAGTGGTCTGCAAGTATTCTGGTCG    | 4  |
| wt-26670-26790 | 1649 | CATCAGAGCGCCAGGAGTCCACACAAATGTAAGAGGGGTTCTTACCTCTCCCTAGCCCTCCCGCCCTCCAAGGACTCGGGCCAGTTTCTAACTTTCCCTTCCCTCCCTCGTCTT       | 4  |
| wt-26790-26910 | 1650 | GCCCTGCGCCCGGGCCACCTTCATCAGCTGCTGACTCCGCCATCAAAGCCTAGGGGAGACCGAAGTGAAGGCCCTGGACCAACCCGGCCCGGGCCCGCCCGTATCGGGCCAGAGGTA    | 8  |
| wt-26910-27030 | 1651 | AGTGGACTTAATTTTTTCTGCTAAGCCAACTCCACCACACCAGGCACACTACACACACCACCCGCTCTCAGGGTCCCTCGGACAGCTCCTAAGAAGGCACCCGGTCCGCCAGT        | 4  |
| wt-27030-27150 | 1652 | CCTACCAGAGGGGCCAAGAACCAGACGAGTCCGTAGAAGGTTCTGTCAGCAAGAAGAGGAGTGGTAAGCGTTACCTTCAGGGTAAGTAACTGACCTCTCCAGGGCTACA            | 4  |
| wt-27150-27270 | 1653 | TAAAGGGAGGCTTAGTATACATGCTTCTTGGTTTTACAGAACTGGGGGCTAGTCTGGTGGGATTAGGCTGCCCTAAGTTGATCAGCCAGGGCTTATGCCCTCCTCAGTTCCTTA       | 4  |
| wt-27270-27390 | 1654 | GTCCCGGGCTTCCAGCCCGCTCCGTCGCCCTCCAGAGACCCGGGCTTCCAGCCCTGCCTCTCTGTTACCCCTTTAGAACCACAGCCTGGACACATGTGCCAGACGCTTGGCTC        | 8  |
| wt-27390-27510 | 1655 | TAAGGCCCTCGGGTCCCGTGGACCCGGGCTCAGCAACCTGCTGCTCCCTCCTGCCACCCAGCCTCCCGCCCTCCCGTCCCGCTTCCGCTCTGATCCTCCCGGGTCCCGAGTAG        | 8  |
| wt-27510-27630 | 1656 | GGCCGCTGCCCGCTGCACCCAGTACCTGCCCTCTTGGCCACGACCCCGGCCAGGCCACTTAGACCCGGCCAAGCCCATCCCTGAAGACCCAGCGGCATTTCTCTGGTAACG          | 8  |
| wt-27630-27750 | 1657 | AGCAGAGAAGAAGTAGAGGCCCGGCCATTGGGCCAGATTGAGAGACCAGTCCAGGGGCCGAGGTTGAGCCAGCGGGCACCCGAGGTCACAGCACCCGGTCCCTCCGGGGGGCAGA      | 8  |
| wt-27750-27870 | 1658 | GACAGGCAGGGCCCGCCGGCAGTGGCCCGAGGAGGCCCGCCGAGTGGGGCCGCTCGGCTGGGCTGGCCGAGCCCGGGTCTGGGAGGTTGGGGTGGCGAGCCTGCTGCTCAGGAGGG     | 12 |
| wt-27870-27990 | 1659 | GCCTGGCTCCCGGGTGGCCCTGGGGTAAGTCTGGGAGGAGAGGGTCCGGCTAGGCCCGGGGAAGTGGAGGGGATCGCCCGGGTCTCTGTTGGCAGAGTCCGGGCGATCCTCTGAGA     | 8  |
| wt-27990-28110 | 1660 | CCCTCCGGGCCGGAGGGTCCCGCTCAGCCCCAGACAGACCCAGGGTCTCCAGGCAGGGTCCGGCATTTAGGGGAGCAGGCTCACCACACAGGGCCCCAGACCCGGGTTCTCG         | 8  |
| wt-28110-28230 | 1661 | GCCAGCCGAGCCAGCCGCCCGCGCCTGCGCCCTCCTCGGGCCAGCCGCGGGTGGTCTGCCCCCTCTCTGTCTCAGAGGAACAGGACCTCGGGCACCCAGAGCCCTC               | 8  |
| wt-28230-28350 | 1662 | GGGCCCGCTCCAGGCGCCCTCTGGTCTCCGCTCCCTCTGAGCCCGTTAAACCCAAAGAATGCTGAGGGGAGCCACCTCGGGGCCAGGGCCAGAGTCCAGAGGTCAGGGGCAC         | 8  |
| wt-28350-28470 | 1663 | CTCAGGGTCCCTCCCGGGTCCAGCCAGCCGAGGGAGGCCCGCCAGCCCGGGCCAGGGCCGTTCTCGCCCTTCCCGGGCTTCCAGAGCCAGGATGCCCCAGAAAGG                | 12 |
| wt-28470-28590 | 1664 | ACCCTAGGCGTCCCTCTCCCTCCAGGCCGAGCCTCTCCCTCGCGGAGAGGGGCTCTTTGGGCCCTCAAGTCCAGCCCAAGGAGCCGAGTGGCCCGATCCCCCACCGGC             | 8  |
| wt-28590-28710 | 1665 | CCTCTCTCTGTCGCCCTGCTCCTCCAACTTCTGCTCCACCTAGACCCAGCTTCTGGCTCCCGGGTCCACCAGGCCAGCCGAGGGACCCCGGACGCCCGGGCAGTCCGCTTC          | 8  |
| wt-28710-28830 | 1666 | CCTCTCCCTGGCCTCTCTCCCGCCTCCACCCGAGCCCGCTAGCTTGCCTCCCAACCGGGTCCATCAGGCCCGGGGAGGACCCCGCGGGGTTGCACTCCCGCTGCAGCTCCCGCTGCAGCC | 12 |
| wt-28830-28950 | 1667 | GCCCAGTCTGCTCCAGGCAAGGGCGCCAGTTTCTCCCGCCAGCCTGAGGCCCGCTCTCTGACTGCTGTAAGTCCAGCCTCCACCGCCCTCCAGGCTCCCGGGCCAG               | 8  |
| wt-28950-29070 | 1668 | CCTGTCACCCCTCCACAGGTGACAGCCCTCTGTCCACCCGGCCATCCCGCCCGCTGCTGCCACCCAGTCCCGGGGAGCTTATGTACCTTGGCCCTGGCTCC                    | 8  |
| wt-29070-29190 | 1669 | CATAGACTCCATGTAAGCCTGCTCGAGTGGTGCCTCCAGAGCCCTTTGCCCGCTGGCGGCCAGCCCGAGCCCGGGCCCGCCAAACTTTGTCAGATGTCAGGGGTC                | 8  |
| wt-29190-29310 | 1670 | AGGGTGAAGCCAGCCCTCCCGCCCTGCTCACTGCCCGGTCCCGCCAGAACCCCAAAAGTAGAGGCTCAGGCCATGCGCGCCTGTACCAGGCTGCCAAAGAGCCAGATCTA           | 8  |
| wt-29310-29430 | 1671 | AGGCCGGGAGAGGAGCCCAAGCGGGTGCAGTAACAGGTAATCTCTGGTAGTGATTGGACCCGAAATCTGACACTTTAGAGCTCTGGAGGACTTTAAACTCTAAAACTCAAACCT       | 4  |

|                |      |                                                                                                                           |    |
|----------------|------|---------------------------------------------------------------------------------------------------------------------------|----|
| wt-29430-29550 | 1672 | TAGAGCGCAATGGGCGCCATTGTGCCACGCGGCATAATGGCGGACCTAGGCTCAAACCCCGAGGAAGGGGGTCTATGGTTGGCTGCGCTGCTGCTATCTTTAGAGGGGAAAAGAG       | 4  |
| wt-29550-29670 | 1673 | GAATAAGCCCCCAGACAGGGGAGTGGGCTTGTGGTGTGACTTACCACAAAGGTCAGGGCCCAAGGGGGTTCGCGTTGCTAGGCCACCTTCTCAGTCCAGCGGTTTACGTAAGCCAGACAGC | 4  |
| wt-29670-29790 | 1674 | AGCCAATTGTCAGTTCTAGGGAGGGGGACCCTGCCCTGGTATAAAGTGGTCTCGCAGCTATTTCTGGTCGCATCAGAGCGCCAGGAGTCCACACAAATGTAAGAGGGGGTCTTCTACC    | 4  |
| wt-29790-29910 | 1675 | TCTCCCTAGCCCTCCGCCCCCTCCAAGGACTCGGGCCAGTTTCTAACTTTCCCTTCCCTCCCTCGTCTGCCCTGCCGCCGGGGCCACCTTCATCACCGTCCGCTGACTCCGCCATCC     | 8  |
| wt-29910-30030 | 1676 | AAGCCTAGGGGAGACCGAAGTGAAGGCCCTGGACCAACCCGGCCCGGGCCCGGGTATCGGGCCAGAGGTAAGTGACTTTAATTTTTCTGCTAAGCCCAACACTCCACCACCCAGC       | 4  |
| wt-30030-30150 | 1677 | GCACACTACACACACCCACCCCTCTCAGGTCGCCCTCGGACAGCTCTAAGAAGCCAGCCGTCGCCAGTCTACCAGAGGGGACCAAGAACCCAGACGATCCGTAAGGGTCTCT          | 4  |
| wt-30150-30270 | 1678 | GTCCAGCAAGAAGAGGAGGTGTAAGCGGTTACCTTACAGGGTAAGTAACTGAGCCTCCAGGCTCACATAAAGGAGGCTTAGTATACATGCTTCTGCTTTTACAGAGCCCTGG          | 4  |
| wt-30270-30390 | 1679 | GGGCTAGTCTGGTGGGATTAGGCTGCCTCAAGTTGCATCAGCCAGGGCTTCATGCCCTCCTCAGTCCCTAGTCCCGGGCTTCAGGCCCCCTCCGTCGCCCTCCAGAGACCCGGG        | 8  |
| wt-30390-30510 | 1680 | CTTAGGCCCTGCCTCTCTGTACCCTTTTAGAACACAGCCCTGGACACATGTGCCAGACGCCCTTGGCCTCTAAGGCCCTCGGGTCCCGCTGGACCCCGGGCTCAGCAACCTGCTGCT     | 4  |
| wt-30510-30630 | 1681 | CCCCTCTGCCACCCAGCTCCCGCCCTCCCGTCCCGCTTCCGCTCTGATCCTCCCGGTCGCCAGTAGGGCCGCTGCCCGCTGCACCAGTACCTGCCCTCTTGGCCACGCAC            | 8  |
| wt-30630-30750 | 1682 | CCCGGGCCAGGCCACCTTAGACCCGGCCAAAGCCCATCCCTGAAGACCCAGCGGCCATTCTCTGGTAAACGAGCAGAGAAGAAGTAGAGGCCCGCGCCATTGGGCCAGATTGAGAGA     | 4  |
| wt-30750-30870 | 1683 | CCAGTCCAGGGGCCGAGTTGGAGCCAGCGGGCACCCAGAGTCCAGCACCCCGTCCCTCCGGGGGAGAGACAGCCAGGGCCCGCCCGGCTGAGCCCGAGGAGCCCGGAGT             | 12 |
| wt-30870-30990 | 1684 | GGGCCGTCGGCTGGGCTGGCCGAGCCGGTCTGGGAGGCTGGGGTGGCGAGCCTGCTGTCTCAGGAGGGGCTGGCTCCGCCGGTGGCCCTGGGGTAAGTCTGGGAGGAGAGGGT         | 8  |
| wt-30990-31110 | 1685 | CGGCCTAGGCCCGGGGAAGTGGAGGGGATGCCCGGGTCTGTGGCAGAGTCCGGGGATCCTCTGAGACCCTCCGGGCCGGAGCGTCCCGCTCAGCCCCAGACAGACCCAGG            | 8  |
| wt-31110-31230 | 1686 | GTCTCCAGGCAGGGTCCGCATCTTACAGGGCAGCAGGCTCACACACAGGCCCGCCAGACCCGGGTCGCGCCAGCCGAGCCGACCCGCCCGCCCTGCGCCTCTCCGGGGCAGC          | 12 |
| wt-31230-31350 | 1687 | CGCCGGGGTGGTCTGCCCTCTCTGTCTTCCAGAGAACAGGGACCTCGGGCACCCAGAGCCCTCGGGCCCGCTCCAGGCGCCCTCTGCTCCCGTCCCTCTGAGCCCC                | 8  |
| wt-31350-31470 | 1688 | GTTAAACCCAAAGAATGTCTGAGGGGAGCCACCCTCGGGGCCAGGCCAGAGTCCAGAGGTCAGGGGCACCTCAGGGTCCCTCCCGGGTCCAGGCCAGCCGAGGGACCCGGCAG         | 8  |
| wt-31470-31590 | 1689 | CCCGGGCGCCCGAGAGGCCGGTCTCGCCCTTCCCGGGCTTCCAGAGCCAGGATGTCGCCAGAGGGACCCTAGGCGTCCCTCTCTCCCTCCAGGCCGAGCCTCTCCCTCG             | 8  |
| wt-31590-31710 | 1690 | CGGAGAGGGGCTCTTTGGGCCCTCAAGTCCAGCCACCGAGACCCGAGTGGCCGGATCCCGCCACCCGGCCCTCTCTGTCGCCCTGCTCTCTCAACCTTCCGCTCCACCCTAGA         | 8  |
| wt-31710-31830 | 1691 | CCCCAGCTTCTGGCCTCCCGGGTCCACAGGCCAGCCGGAGGGACCCCGGCGAGCCCGGGGAGTCCGCTTCCCTCTCCCTGGCCTCTCTCCCGCCTCCACCCGAGCCCGCTCAGC        | 12 |
| wt-31830-31950 | 1692 | TTGCCTCCCCACCGGGTCCATCAGGCGCCGGGAGGGACCCCGGGCCCGGTGTGAGTCCCGCTGACAGCCCGCCAGTCTCTGCCTCCAGGCAAGGGGCCAGCTTTTCTCCCCCAGC       | 8  |
| wt-31950-32070 | 1693 | CTGAGGCCAGTCTCCTGTGCACTGTCTGTAAGTCCAGCCTCCACGCCGCTCCAGGCTCCCGGGCCAGCTGTCACCCCTCCACGGTGGACAGGCCCTCTGTGACCCGGG              | 8  |
| wt-32070-32190 | 1694 | CATCCCCCGCCCTGTGTCCACCCAGTCCCGTCCAGGGGGACTTTATGTGACCTTGGGCTGGCTCCCATAGACTCCCATGTAAGCCTGCCTCGAGTAGGTGCCTCCAGAGCCCC         | 8  |
| wt-32190-32310 | 1695 | TTTTGCCCGCTGGCGGCCAGCCCGCCGGCGCCCGCCAAACTTTGTCCAGATGTCCAGGGTCCCGAGGGTAGGCCAGCCCGCTCCCGCCCTGCTCCACTGCCCGGTCCCG             | 8  |
| wt-32310-32430 | 1696 | CCAGAAGCCCCAAAGTAGAGGCTCAGGCCATGCCGCGCCTGTACCAGGCCCTGCCAAAGAGCCAGATTAAGGCCGGGAGAGGCCAGCCCAAGCGGGTGCAGTAACAGGTAATCTCT      | 4  |
| wt-32430-32550 | 1697 | GGTAGTGATTTGGACCCGAAATCTGACACTTTAGAGCTCTGGAGGACTTAAAACTTAAAACTAAAACTTTAGAGGGCAATGGGCGCCATTTTGTCCACGCGCCGATAATGGCGGA       | 4  |
| wt-32550-32670 | 1698 | CCTAGCCCTAAAACCCCGAGGAAGGGGCTATGTTGGCTGCGCTGCTGCTATCTTTAGAGGGGAAAAGGAATAAGCCCCAGACAGGGGAGTGGGCTTGTGTGACTTACCAAAA          | 4  |
| wt-32670-32790 | 1699 | GGTCAGGGCCCAAGGGGTTCCGCTTGTGCTAGGCCACCTTCTCAGTCCAGCGCGTTTACGTAAGCCAGACAGCAGCCAAATTTGTCAGTTCTAGGGAGGGGACCACTGCCCTGTATAAAG  | 4  |
| wt-32790-32910 | 1700 | TGGTCTCGAGCTATTTCTGGTCCGATCAGAGCGCCAGGAGTCCACACAAATGTAAGAGGGGGTCTTCTACCTCTCCCTAGCCCTCCCGCCCTCCAAGGACTCGGGCCAGTTTCTAAC     | 4  |
| wt-32910-33030 | 1701 | TTTTCCCTTCCCTCCCTCGTCTTGCCTGCGCCGGGGCCACCTTATCACCGTCCGCTGACTCCGCCATCAAAGCCTAGGGGAGACCAGGAGTGAAGGCCCTGGACCAACCCGGCCGGG     | 8  |
| wt-33030-33150 | 1702 | CCCCCGGTATCGGGCCAGAGGTAAGTGGACTTTAATTTTTTGTGTAAGCCCAACACTCCACACACCCAGGCACACACTACACACACCCACCCGCTCAGGGTCCCTCGGACAGCTC       | 4  |
| wt-33150-33270 | 1703 | CTAAGAAGGCACCGTCCGCCAGTCTACCAGAGGGGCAAGAACCAGAGCAGTCCGTAGAAGGGTCTCTGCCAGCAAGAAGAGGAGGTGTAAGCGGTTACCTTACGGGGTAAGT          | 4  |
| wt-33270-33390 | 1704 | AACCTGACCTCTCCAGGGCTACATAAAGGGAGGCTTAGTATACATGCTTCTTGGTTTTACAGGAACCTGGGGCTAGTCTGGGTGGGATTAGGCTCCCTCAAGTTGCATCAGCCAGGG     | 4  |
| wt-33390-33510 | 1705 | CTTCATGCCCTCCTCAGTCCCTAGTCCCGGGCTTCAGGCCCCCTCCGTCGCCCTCCAGAGACCCGGGCTTCAGGCCCTGCTCTCTCTGTTACCTTTTAGAACCACAGCCTGGAC        | 4  |
| wt-33510-33630 | 1706 | ACATGTGCCAGACGCTTGGCCTTAAGGCCCTCGGGTCCCGCTGGACCCCGGCTCAGCAACCTGCTGCTCCCTCCTGCCACCCAGCCTCCCGCCCTCCCGTCCCGCTTCCGCTCC        | 8  |
| wt-33630-33750 | 1707 | TGATCCTCCCGGTCGCCAGTAGGGCCGCTGCCCGCTGCACCCAGTACCTGCCCTCTTGGCCACGACCCCGGGCCAGGCCACCTTAGACCCGGCCAAAGCCCATCCCTGAAGACC        | 8  |
| wt-33750-33990 | 1709 | CACCCGGTCCCTCCGGGGGACAGACAGGCAGGGCCCGCCGAGCTGGCCCGGAGGAGCGCCCGGAGTGGGGCCGCTCGCTGGGCTGGCCGAGCCCGGGTCTGGGAGGCTGGGGT         | 12 |
| wt-33990-34110 | 1710 | GGCGAGCCTGCTGTCTCAGGAGGGGCTGGCTCCCGGGTGGCCCTGGGGTAAGTCTGGGAGGCAGAGGCTCGCCCTAGGCCCGGGGAAAGTAGGAGGGGATCGCCCGGGTCTGTGG       | 8  |
| wt-34110-34230 | 1711 | CAGAGTCCGGGATCCTCTGAGACCTCCGGGCCGACGGTCCGCTCAGCCCGCAGACAGACCCAGGGTCTCCAGGCAGGGTCCGGCATCTTACGGGGCAGCAGGCTCACACCA           | 8  |
| wt-34230-34350 | 1712 | CAGGCCCGCCAGACCCGGGCTCGGCCAGCCGAGCCGACCCGCGCCGCGCTGGCGCTCCTCGGGCCAGCCGCGGGTGGTCTGCCCCCTCTCTGTCTTACAGGAACCCAGGG            | 12 |
| wt-34350-34470 | 1713 | ACCTCGGGCACCACAGAGCCCTCGGGCCCGCTCCAGCCCGCTCCTGGTCTCCGCTCCCTCTGAGCCCGTTAAACCCAAAGAATGCTGAGGGGAGCCACCTCGGGGCCAGGCC          | 8  |
| wt-34470-34590 | 1714 | CCAGAGTCCAGAGGTACGGGACCTCAGGGTCCCTCCCGGGTCCAGGCCAGCCGAGGGACCCCGGAGCCCGGGCGGCCAGAGGCCGGTCTCTCGCCCTTCCCGGGCTTCAG            | 12 |
| wt-34590-34710 | 1715 | AGCCAGGATGCCCCAGAAAGGACCTTAGCGTCCCTTCTCCCGCTCCAGGCCAGCCTCTCCCTCGGGAGAGGGGCTTTGGGCCCTCAAGTCCAGCCCGCCAGCCCGGACCCG           | 8  |
| wt-34710-34830 | 1716 | AGTGGCCCGATCCCCCACCGCCCTTCTCTGTCCCCCTGCTCTTCCAACTTCCGCTCCACCTAGACCCAGCTTCTGGCCCTCCCGGGTCCACCAGGCCAGCCGAGGGACCC            | 8  |
| wt-34830-34950 | 1717 | CGGACCCCGGGGAGTCCCTTCCCTTCCCTGGCTCTCTTCCCGCTCCACCCAGCCCGCTCAGCTTCCCTCCCGGGTCCATCAGGCCGGCCGAGGGACCCCGCGGCGC                | 12 |
| wt-34950-35070 | 1718 | CCGGTGTAGTCCCGCTCGACCCCGCCAGTCTCTGCTCCAGGCAAGGGCGCCAGCTTTTCTCCCGCCAGCCTGAGGCCAGTCTCCTGTGCACTGTCTGAAAGTCCAGCCTCCACG        | 8  |
| wt-35070-35190 | 1719 | CCCGTCCACGGCTCCCGGGCCAGCCTGCTCCACCCCTCCCGACGGTGGACAGGCCCTTCTGCCACCCCGGCCATCCCGCCCGCCCTGTGTCACCCAGTCCCGTCCAGGGGAACTTT      | 8  |
| wt-35190-35310 | 1720 | ATGTGACCTTGGGCTGGCTCCCATAGACTCCCATGTAAGCCTGCTCAGTAGGTCGCTCCAGAGCCCTTTGCCCGCTGGCGCCACCCAGCCCGCCCGGGCCCGGAACTT              | 8  |
| wt-35310-35430 | 1721 | TGTCAGATGTCCAGGGTCCCGAGGGTGGAGGCCAGCCCGCTTCCCGCCAGCCCGCTTCTCCCGGAGATTTTTGGGAATGGTGAATTTTCTCCCTTGTATTTGCTATTCAA            | 4  |
| wt-35430-35550 | 1722 | TCAACTGATTTCCCGTCTCATACCTCCACTTACAACCAAGCCACTACGGCCAGTCCCGGCTCCCGCTCGGGTAAGTCTTTTTCATTTTAGCCCCAGCCCTCCTCTATAAGTT          | 4  |
| wt-35550-35670 | 1723 | CTAGGCAACCTCCAATCACAGCCACCTCCAATGATGCTCTTAGAGAGTGGCTGCTACGCATTAGAGACCACCTTGGCCACCCACAGTAACACCCAGCCCAATCTGTCTACATA         | 4  |

|                |      |                                                                                                                                    |    |
|----------------|------|------------------------------------------------------------------------------------------------------------------------------------|----|
| wt-35670-35790 | 1724 | GAAGAAGAAGAGGATGAAGACTAAGTCACAGGCTTAGCCAGGTGATTTGTGAATTCAGTTATTTACTTTCTTCCAATCAAGCTTCCAGCCTCCGCTGTAGTCTAGTTATGGG                   | 4  |
| wt-35790-35910 | 1725 | TTTTCCATGGGGACTTAGTATCCGTTCTATTAGATTAACTGCAAGACGCTAAACTTAACCAAGGTCAGCCAAGGGACGCGTGTATCCCAGGCTGCCACCCTGAGGATTTCCCCCA                | 4  |
| wt-35910-36030 | 1726 | AAATCCTCCTACCCTCTCTTTATGCCATGTGTGTGTGGCTGTGTAGTGTCTATGTAATGCGTTGCCGCCAGGTGGCAGCCTGTTATAGATGTGCAGTACCCTTAATGTTAGTCT                 | 4  |
| wt-36030-36150 | 1727 | GCTTAGGGCTGCCAGGTGGCCCAATCTAGGATTAATTCACCTGTATCCCTTTCCCTCCACCAGCAGTAACCCAGCACTGGCGTGTACGTTGGTAAAGTTTGCCTGAACCTGTGGTT               | 4  |
| wt-36150-36270 | 1728 | GGGCAGGTACATGCCAACACCTTCTAAGCACCCCGCCTGTGTGTTTGTCTTATCTGCCCATCATGCCATACATTTCTGCGTTACATGGGGGACAAACATATCATCTAATGTTGT                 | 4  |
| wt-36270-36390 | 1729 | ACACGGATAGTCTTGGAAACCCGCTACTCTCAGTAATCCCTCGAATCCCTACCAGGAACAAGTGTACAGACACTCCATAATCCACTAACAACTTTTGTGGGAAAAACAGGGGGTGC               | 4  |
| wt-36390-36630 | 1730 | CACCTGACGACAGGGATGCCATGGGACAAAGCAACCACTCTTGATAGGGATGACGATAGGATGACGCTGGGGCCAGCCATGGTGGCCACCCATCTGCCATCTGCTATGCGAATGCTTTGGATGGCTAATT | 4  |
| wt-36630-36750 | 1731 | ATATTGTAAGACAATCACGGGGTGACCGGGGCTTATTTTGGCACAAGGCCACAAACAGCCCTCAGGCCAGGTTGGTCCAGCCACATGTCCCCCTCTACGCCGACAGCACCCACCA                | 4  |
| wt-36750-36870 | 1732 | TTTTGTACCTCTGTACAAACCGAGGCTTACCCTCCACAACCACTCATGATGCCACCAAGGCTACCCTCCTACCCTCTGCCACCTGCAACACTAACGGTGCACCAAGGCTACC                   | 4  |
| wt-36870-36990 | 1733 | GTCCCTACCCTCTGCCACCCACACCACTACTCACGGTACTACAAGGCTACCAGAACTCAACCCACACCATACCACCAACGATGCATCTCCCTGTCTTGCATGTGCCAGACCAATCAA              | 4  |
| wt-36990-37110 | 1734 | TGCACCTCTTACTCATCAAAGCACCCTAATGATCCAGATAGTCCAGAACCAGGTCGCCGACTGATTTTATAACATCCACCTATGCCATTACCCCTCACAATTGCCACCACCA                   | 4  |
| wt-37110-37230 | 1735 | CAGCACGACAGCCACCTCCAGGGGTATCAACGACCAACAATACATCATCTACCCTGGGGCCAGCCATGGTGGCCACCCATCTGCCGACCCCTGCGACCCCTCAAGACTCAAGGCC                | 4  |
| wt-37230-37470 | 1736 | GTCCATGACATGCCGAAGTCCAGTCTCGGCTTCTATCAGGGACAAGGGGCTGGGGACTACCAACTCCTGGCCATCCAATGCCGCCCGGTTGTAGAAATTCACACAGGCAA                     | 4  |
| wt-37470-37590 | 1737 | CCCCTAAGGTTTACCATAACATGAACCGGAGTCCCATAATAGCCAGAGGCTCCATTCTCTCCCGATGATGGTATCCTCCATCTATAGACCCGACAGACTAGACGAAAGTTGGG                  | 4  |
| wt-37590-37710 | 1738 | ATTACATTTTGTAGACAACAGAACTCTCCTAGCTCAGATGAAGATTATGTGGAGGGACCCAGTAAAAAGACCTGCCCTCCATCCAGTAAAAACCTTGGCTCTCCAGCAACCAATGAT              | 4  |
| wt-37710-37830 | 1739 | CCCAAATAAATGTTACTTCTTTGCTCTTAACCAATTGACACGCTGTCTTCTATCAATTAACAAGGGAAAAAGGTTAGCTATTCCACCAACACGACCCCAAGGAAGGCTTGCACAAA               | 4  |
| wt-37830-37950 | 1740 | TGGTGCCCTGTCTCAGCACTTTGCCAGCAACTATAGCATGGTAGGCAGCTCAACTCGGCCGCTTACTGCCAGCCACTCTCCACTCCAGTCCATGTTCGCACTCCTATGCATT                   | 4  |
| wt-37950-38070 | 1741 | TCCTGCCCTCCACTTTTACCCAGTCCCAACCCAAAACACACACAACACATAGAATTTGTTAGTTTAAACAGTTTATTGATAGGTGGCTGCTTTAGCCTAATTGTATTGCTCTCGT                | 4  |
| wt-38070-38190 | 1742 | TGCCAAAACCTGTTGTAAGGGCCGGCACCCGCAACATGGGAAAAACATAACCGCCGCCATCCCATGGGAGGGTAGAGCGGTTGACATGTAGGTGAGTAGTGAAGAAGCATGGCGAAG              | 4  |
| wt-38190-38310 | 1743 | TAGACAGTTACTTTTAGAGTGTAGTGTACAGGGCCGGGCCAACAGTGCACCAACCCGGGGTCTGAGCATTCCATGGGCAGCAGGGACACTGCACTACCGCCAGGCTCCTGGGGCAGCC             | 4  |
| wt-38310-38430 | 1744 | GGGGTTCCTGGCGCTCCGGGGGACGCCGGGGCCGCCGGTGGTCCGCTGGGCCGCTGCCCGCTCCGGTGGGGGGTGGCCCGCTGGGCACCCGCTGCGCCGCCAGGCTCCTGGG                   | 12 |
| wt-38430-38550 | 1745 | CAGCCGGGGTCTGGCGCTCCGGGGCAGCCGGGGCCGGCCGGTGGTCCGCTGGGCCGCTCCGGTGGGGGGTGGCCCGCTGGGCACCCGCTGCGCCGCCAGGCTCCTGGG                       | 12 |
| wt-38550-38670 | 1746 | TGGGGCAGCCGGGTTCTGGCGCTCCGGGGCAGCCGGGGCCGGCCGGTGGTCCGCTGGGGCCTGCCCGCTCCGGTGGGGGGTGGCCCGCTGGGCACCCGCTGCGCCGCCCA                     | 12 |
| wt-38670-38790 | 1747 | GGTCTGGGGCAGCCGGGTTCTGGCGCTCCGGGGCAGCCGGGGCCGGCCGGTGGTCCGCTGGGCCGCTGCCCGCTCCGGTGGGGGGTGGCCCGCTGGGCACCCGCTGCGCCG                    | 12 |
| wt-38790-38910 | 1748 | CGCCAGGTCCTGGGGCAGCCGGGTTCTGGCGCTCCGGGGCAGCCGGGGCCGGCCGGTGGTCCGCTGGGCCGCTGCCCGCTCCGGTGGGGGGTGGCCCGCTGGGCACCCGCTGC                  | 12 |
| wt-38910-39030 | 1749 | GCCGCCGCCAGGTCCTGGGGCAGCCGGGTTCTGGCGCTCCGGGGCAGCCGGGGCCGGCCGGTGGTCCGCTGGGCCGCTGCCCGCTCCGGTGGGGGGTGGCCCGCTGGGCAC                    | 12 |
| wt-39030-39150 | 1750 | GCTGGCCGCCGCCAGGTCCTGGGGCAGCCGGGTTCTGGCGCTCCGGGGCAGCCGGGGCCGGCCGGTGGTCCGCTGGGGCCTGCCCGCTCCGGTGGGGGGTGGCCCGCTGGG                    | 12 |
| wt-39150-39270 | 1751 | GCACCCGCTGCCCGCCAGGTCCTGGGGCAGCCGGGTTCTGGCGCTCCGGGGCAGCCGGGGCCGGCCGGTGGTCCGCTGGGGCCTGCCCGCTCCGGTGGGGGGTGGCCCG                      | 12 |
| wt-39270-39390 | 1752 | GCTGGGCACCCGCTGCCCGCCGCCAGGTCCTGGGGCAGCCGGGTTCTGGCGCTCCGGGGCAGCCGGGGCCGGCCGGTGGTCCGCTGGGCCGCTGCCCGCTCCGGTGGGGGGT                   | 12 |
| wt-39390-39510 | 1753 | GCCCGCTGGGCACCCGCTGCCCGCCGCCAGGTCCTGGGGCAGCCGGGTTCTGGCGCTCCGGGGCAGCCGGGGCCGGCCGGTGGTCCGCTGGGCCGCTGCCCGCTCCGGTGGG                   | 12 |
| wt-39510-39630 | 1754 | GGGTGGCCCGCTGGGCACCCGCTGCCCGCCGCCAGGTCCTGGGGCAGCCGGGTTCTGGCGCTCCGGGGCAGCCGGGGCCGGCCGGTGGTCCGCTGGGCCGCTGCCCGCTCCGG                  | 12 |
| wt-39630-39750 | 1755 | GTGGGGGTGGCCCGCTGGGCACCCGCTGCCCGCCGCCAGGTCCTGGGGCAGCCGGGTTCTGGCGCTCCGGGGCAGCCGGGGCCGGCCGGTGGTCCGCTGGGCCGCTGCCCGC                   | 12 |
| wt-39750-39870 | 1756 | TCCGGGTGGGGGGTGGCCCGCTGGGCACCCGCTGCCCGCCGCCAGGTCCTGGGGCAGCCGGGTTCTGGCGCTCCGGGGCAGCCGGGGCCGGCCGGTGGTCCGCTGGGCCGCTGCCCGC             | 12 |
| wt-39870-39990 | 1757 | CAGCCCGCCGATCCTCCCCAGGGCGTACCAGGCTTGCCTGGTTCTGGGGCTCCTGGGGTCCGCTGCATCCGCCGTAGGGTTGGAATGGGGTGGTCCGCTGCTGCTGGCC                      | 8  |
| wt-39990-40110 | 1758 | GGTACGCTGGATTGCCGGCTGGGGGTGGGGTCCCGGACGCCCCCTCCTGCTCCACCAGGTTCCCTCCCCAGGGCGTGCCCGCTTGCCTGGTCTGGAGCTCATCCGGGATGC                    | 8  |
| wt-40110-40230 | 1759 | TGCATCCGCTAGTCCGACTGGGTGGTGGCGTCCGCTGCCCCACCCCTGGGGTAGCCCGGGTCTGCTGGTCCGCTGCACCTGGAAGGCAGGGGGGGGGCAGTGAGGGAGGGCGT                  | 8  |
| wt-40230-40350 | 1760 | GGTCTGGGACCCCGCCGACTGGCAGGGGGTCCCATGGCACAGGCTAGGGTCCAGGGGGCAGCCGGCCAGCCCGCCGTTACGGGGAGGACCCGCGCCAGCCAGG                            | 12 |
| wt-40350-40470 | 1761 | GGCCCGGGGGGGTGGGGGGTGGCGCTCCAGGCCGACCCCTGGTGGCAGGCAGGGACCCCGCCACCCGCTTATGGGGGGGAGGCCCGCCGCAAGGACGCCGGGGGGCTGGGAGGTG                | 12 |
| wt-40470-40590 | 1762 | TGCACCCCGGAGCGTCTGGACGACGCTGGCGAGCCGGGGCCGGCTGCCTCTTTTATCCTCTTTTGGGGTCTGTGTAATACTTAAAGTTTGTCTCAGGAGTGGGGGCTTCTATTG                 | 4  |
| wt-40590-40710 | 1763 | GTTAATCAGGTGTGCATTTAGCCGTTGGGTTTATTAAAGGTGTGCACAGTGGTGGTACTGGAGGTTATTCTATTGGGATAACGAGAGGAGGAGGGGCTAGAGTCCGGGAG                     | 4  |
| wt-40710-40830 | 1764 | ATTTGGGTAGGGGAGCCCTCAGGAGGTTCCCTCCATAGGGTTGAACAGGAGGGGGAGGATTGGGCTCCGCCCGATACCTAGTGGGTGAGCCCTAGAGGTAGGTATCCATAGGGT                 | 4  |
| wt-40830-40950 | 1765 | TCCATTATCCTGGAGGTATCCTAAGCTCCGCCCTATATACCAGTGGGTGGAGTGGTGGTACTGGGTTCTACTGGGGTACCCTACCTACCTAAGGTGCGCCACCCCT                         | 4  |
| wt-40950-41070 | 1766 | TCTCTTCCGTTTAAATGGTAGAATAAACCCTATAGGTTATTAACCTAGTGGTGGAAATAGGTTATTCAGACTGGGTATATACCTAAGGTATATAGAACCAGAGGAAAGGAAACCTATAG            | 4  |
| wt-41070-41190 | 1767 | TGTAATCCCTCCCCCCTACCCCCCTCCCTTACGGTTGCCTGAGCCATCCCCACCCAGCACCCGGGGTACGTTGGCACCCCGCTGCCTACTGACTTGTACCTTTGCACAT                      | 8  |
| wt-41190-41310 | 1768 | TTGGTCAGCTGACCGATGCTGCCACTTCTGGGTGATGACCTGGCTGTGCTTGTCCCGTGGACAATGTCCTCCAGCGTGGTGGCTGCCTTTGGATGCATCACTTTGAGCCACTAA                 | 4  |
| wt-41310-41430 | 1769 | GCCCCGTTGCTGCCTTGCCTGCCTACCATGACACACTAAGCCCTGCTAATCCATGAGCCCGCCCTTATGGAAGCACCAGTCCCGGGGACGGAAGGGGACTTGGGGTGAATTTCTA                | 4  |
| wt-41430-41550 | 1770 | TGTGGGGTGGAAATAGAGCAAGAATAAAGCAGCGCTTATTAACCTGATCAGCCCGGAGTGTGCTTTCATCACTAACCCCGGGCTGAAGAGTTGACAAGAAGGGTCAAGGTT                    | 4  |
| wt-41550-41670 | 1771 | TCGTCTGTGTGTAAGGGCAGGGGCTGTGGGTGATCTGGAACGGCTTACCTCGGTAAGTGTTCCTTCCCAAAAAGTTGGGGATAGGTTTAGCCCTTTAGCTGCCATTTCAAGCT                  | 4  |
| wt-41670-41790 | 1772 | GGGGTGTGCAGATGCAGTCTCCGGGTGGGCAGCAGTACGAGATGTCACCTGTGTTGCTTTCTCCACCCCTGTCTGGCTGTGGCAAAATGCGAACCTCATAGAGTTGTGTTTCAG                 | 4  |
| wt-41790-41910 | 1773 | GTCTGTGCTGTTTTCGGTGGGTTATTTCTCCCTCAGTGTGGCCAGTATTTCCCAAGTTTTCACGACTGGGGCTGTGGACACCTGAGGGAGCCGGCTTGGTGGTATGTGT                      | 4  |
| wt-41910-42030 | 1774 | TGGAATTGCTCCACCCTCAATTTTCGCTTGCCTTCTCCCTGTTAACCTGATAGCATAGCCTTAGGTTTCTTGTAGTCTGTTGGGTTGTGGTTACGTTGTGTAACCTGAA                      | 4  |

|                |      |                                                                                                                              |   |
|----------------|------|------------------------------------------------------------------------------------------------------------------------------|---|
| wt-42030-42150 | 1775 | TTTTTTGGTTTTCTAGTTCCTTAATTACATTTGTGCCAGATCTGTGAGAGCAAGATGGCCTATTCAACAGGGAGATACTGTAGCCCTGTGTATACGGGACAGTCGTGTGCATGGA          | 4 |
| wt-42150-42270 | 1776 | AATGGTACCCTGCATCCTGTGTTGGAGCTAGCAGCAAGAGAAACACCTCTCCGCTTTCCGCCAGAGGACACTGTAGTTCTGCGTTATCATGTGTTGCTTGAGGAGATAATTGAACGAAAT     | 4 |
| wt-42270-42390 | 1777 | TCAGAGACATTTACAGAAACTTGAACAGATTTAATACACACACCCGAACATGTGGATCTGGATTTAACTCAGTATTTTAGAGATATTTACCCTGGAGACCCCAAGCCTTGGGCGCGC        | 4 |
| wt-42390-42510 | 1778 | TTGGCCTGGATGGCCTGGTGCATGCATGCTGCAGGACATTTGTGTTGAACAGTCTACTCCTTACTATGTTGTGGACCTGTGAGTTCGTGGGATGTTAGAAGCCAGCGAAGGCCTGGAT       | 4 |
| wt-42510-42630 | 1779 | GGTTGGATTCAACAGGGCGGCTGGTCTACATAAATGAAGACAACATTCCTGGATCCAGAAGGTTTAGCTGGACTGACTTGTAGTCTGTTAGTTATATGT                          | 4 |
| wt-42630-42750 | 1780 | AGTTATTTATTTATCTCCAGAGGAACTAATCTATACATTTTCTCAGCCTTTATGAATCAGGGTCATTTGGCCGCGGAACTGAGCCAGTAGGATATAGGCAAGGGTGACA                | 4 |
| wt-42750-42870 | 1781 | CAGTGCCTATGCATTATAAATTAACCAACACAGTGTCTGCTGTTTAGGCCGCGCATGGGGCTTTACAAGCAATAACAGTCCCAATGACCCGCCCCCACTTTTAAATCTGTTGCAGACA       | 4 |
| wt-42870-42990 | 1782 | TAGCTGATACCCAATGTTATCTTTTCCGCGCAGAAATGAAAGTGTGGCCATATCTACAATTTGGGTGCTAGTGGGATATACGCCTGTGGTGTCTAACGGGAAGTGTGAAGCACAC          | 4 |
| wt-42990-43110 | 1783 | ACGTAATTTGCAAGCGGTGCTTACGCCTCTTCGTTAAAATAACACAAGGACAAGATACTAAAGAAATAACTGAGGTGAGTGTGGGAAGATGGGAATACATATGTGTTATGTTAACGGGTGA    | 4 |
| wt-43110-43230 | 1784 | GAGCCTACTGCAGCCAGACTCGGGGGGAGGAGAAATGGTAAGAGTTACTCTACTTATCTTTTTGACACTACATTTAACTGTTATGTAACAATGTTTCTTATTTTTCATGTTC             | 4 |
| wt-43230-43350 | 1785 | ATAAAGCCTATGTTAATGATGAAGAACCTGTGTTCTTTGGAAGTGGGCCAATGGGTAGTAGGTTTTGGGAGGTTGCCGTCTAGATATTTCAACTGCCACAGACCCCACTTTGTCCCA        | 4 |
| wt-43350-43470 | 1786 | CCTGTACCACATTTAGTCTGCATCCACCTCAGTGGGCGAGTGTCTCACCATTGGCTCTTTAGTGGATGGAACACAGTCCAGCCCAAGGCTACCTGTTAAATCTGTTGCATGTCCA          | 4 |
| wt-43470-43590 | 1787 | CCCCACCTGTGTTACTGTGCGCTGATTATCCTGGCTTAGCAGCCTCCAAGTTTACAAGACGTCCCAATGCCCTGCCCTGGTCCAAGTCTCGCCGTTTTACGAGCCTGTTGTAGC           | 4 |
| wt-43590-43710 | 1788 | CTGCCCAAGTTTCGACAGTTTCCCCATGCTTCCACCCGTTAACCCAATAGCATGACAGCCAATCCAACACGAGGCAAGTTTTAAGAGTTAAAAGCAACTACTGTTTATTTCCAAAA         | 4 |
| wt-43710-43830 | 1789 | TGAGCTGGATATAGTTGATGATCTGTAGGCCAGCTCATCCCACTTCCAGGTCCTTGTAGGCTCGTAGATGGCATCTTCGTCACATTGACAGCCTTCTCATATACCGTGTCTCTGG          | 4 |
| wt-43830-43950 | 1790 | GGCTGACCTTATACAGAAGCGTCCCCTACTAGGTCACCGCCAGCTCGTAGGTGGGGCTATGTTTTCACATAACAGTTTCAAGCAGGTCTCTGGGATGTGAAGGGAGGTGCCCTGGA         | 4 |
| wt-43950-44070 | 1791 | CGAGGAGATGCATGATTAGGCCCCCTTTCCATTTGTGCTGAAGATGGGGCAGATGGTGCCACAAAAGTGCCTGACCCAGGTAAGCGTAGAGAAGGCTGGGTTGGGAAAGTCCAGCT         | 4 |
| wt-44070-44190 | 1792 | TACTGCACTGGGAGAGCTGCTGAGCAGAGACATAGAAGTCTTGTGGGATTATCTTGTGGACATTGTTGAAGAAGGAGAGCTGGGTGGAGCTAAACTCCTGAGGCACATGAACCT           | 4 |
| wt-44190-44310 | 1793 | GGACCTATTGATGCAGATCTCGCAGTGAGACCCAGAGTCAGGCTGTGGCCGAAGGGAGACAGCGCAAGGCAGCGCCCGGGGGAGAGAGTGACAGTGACAGTGGGAGAACACGGCCT         | 4 |
| wt-44310-44430 | 1794 | CTGAGACATGATGGGGGTGTTTCATCTCACGCAGAAAATCTTTGCCAGCTCAAAGTTGGCAGAGATTCGCCGTAAGAAGTCCCGTAGTGAAAAATGGGATCTGTCTACACCATGCTCTGG     | 4 |
| wt-44430-44550 | 1795 | TGTGCCGGGAACATATTGATCGGGCCACTGCCAACCTTTCCATCTTCCAGCTCTGAGCGAGATTTCCACACCTGGACACCCGACTTCAAGCTATGCGCCGAGGCTTTGAGGCCG           | 4 |
| wt-44550-44670 | 1796 | TGTAGTTCTGTGGTGGGATGCATTAGCCGGCGCAATGCGGGATCTGCCGCTGTGTCGCTGATTTACAGGCTGCGGGTGGCCATCTGGGGTACCCGGGCCATCGGGTTTACTTTTTCACAGTAGA | 4 |
| wt-44670-44790 | 1797 | CCTGGGAAGTTTATAGGACTGTACCAGGTCAAGGCCGTGGATGCGCAGACCACGCTCCAGTTCTTACTGACATCCACGAGGATTGTTTTGCCACTCTGGCCACTTGTGTGGATTTAA        | 4 |
| wt-44790-44910 | 1798 | ATATGTACACAAGCGTAATTAACGAGTCACAGACCCCTGTTCCAGATTCTGACCGCTGCAAGCGCTGCCTTAAAGGCCTGGAAGCTGGGTGGGTAATCTGACCAACAGCAGCTCG          | 4 |
| wt-44910-45030 | 1799 | GATTCGTGATGCTGTGGTGTATGACACAGGGGGTCCGAGAACAGGTGCTTGTGGAAGTCTTGGGGGTGCACATCTGCAGCCAGGCCCTTACGCTGGGGCATGGCACATCCAGCAGCG        | 4 |
| wt-45030-45150 | 1800 | TGTTTTGGCTTGTATGAGGAACACGATCCTGTCTAGGATTTGATGTTGTTGCCGAACGATCAAGAATCAGGCTCTGAAGCCGTCAAGGGTGTCTTGGCGTCCGGGTGGGCCCGCA          | 4 |
| wt-45270-45390 | 1802 | CCAATCCGCCAGCTCATCCGCGTGTATCCGCTTTAAACCGATAGCATGGTGGCTGGCCCGGAGCAGGCTCCCTGCCAGTACTAATAGTAGTCCACAGTAGTCGCCCT                  | 4 |
| wt-45390-45510 | 1803 | TGGTTGTAATTTACAGGAGAGAGTCTCCCTTTTCCGCGCTGAGAAAATGGAATGCTGCTCGTTTCTGGTAGGCAGGTGGCAGCAGAGGGCGGTACAGGCCCTGCCAGCTCCCTCG          | 4 |
| wt-45510-45630 | 1804 | GGACATCCTGGGAATCTTTCAGGTTCTGGTCCAGGGAGGGTAAGAAAAGTGGGGTGGTCTGGGCCACATGGACTTGAAGCAGAAGTGGCCGGGACTGGCCGTGAGGATGGATT            | 4 |
| wt-45630-45750 | 1805 | TCAGAACTCCAATTTGTAGTAGCCAGGTTGGCATTCTAATCATGTGAGAAAGGACACAGGGAGGAAGCACCAGCAATGTAAAGTGAAGCTGGATGTCAATGGCAAGAACTCTGG           | 4 |
| wt-45750-45870 | 1806 | AGGGCATGAAGAGGGAATCCAACCCCGCCATGGGGAAGTATTTATCAGGATGTGTAAGAAAGTCCATGCCTGTGATGAGGCTAGAGATCCAGGCTCGTGGGGCATTTAGACAGTAGT        | 4 |
| wt-45870-45990 | 1807 | AGCAGACAGGGCATAGTCTCAAGAAGGCCACGGGGGCATCTGAGTGATTACACAGGCTGTCGAGCAGATCAAACTCGGCAGTGTGCTGGTGGAGAGAGGACTCGTAGGTGTGGA           | 4 |
| wt-45990-46110 | 1808 | CGAGTGGTGGTAGGCTATCCCTTCTCCGCTTGGCTGGAAGATAGGAGTGGCCATCAAAAGGCCGACTGCCCTGAACTGGCTTTTTCAGATTGTCCAGGTCCAGGCCACAAAGTCCCT        | 4 |
| wt-46110-46230 | 1809 | CCATCTTTGGAGTTCTGCCCGCATCTGTGCCACCTCTGTACGCCACTCCTCGTAGGGGGCAGCTGGACAGTCTTTTCCGGTCAAGGGGTTGGCTCGTTTCCGCTCGTACTTTGT           | 4 |
| wt-46230-46350 | 1810 | GAGCCATGACACATCTGGTGGCAAGGTGAGGTCCTTCTGGTTTTTAAATACGGGGTCCGCCACAGTTTCTGGGACACCGCCACAAGGACAAGGTGGGCTAGCAAGTTCTCGAGTCTACG      | 4 |
| wt-46350-46470 | 1811 | AAGACTCCGGGGCAGTCTTTTGTGTTTCTGCCTATGATCCACCCCAATCTCGCCCCCTAATTGCGCCATCTGCCTACGCGAGGCTGAACCTCCTGAATCACTGCATCTTTCTGAGG         | 4 |
| wt-46470-46590 | 1812 | CGTTTAAAGAAGAGAATAGTGGCCAGGGCCTCGTGGGGTCCAGCGTGAGGCTTATTTTGAAGGAGGATATATAAAACAGGTCATTGCTCGGATTGTGGCAGCCGATAGCACCCCTAG        | 4 |
| wt-46590-46710 | 1813 | ATCTAGTGAATCATGGCGAGCCCGGAAGAGAGGCTCCTAGACAGCTCAATAACGTAATTTGTGTCATTTCTGTGTGACTCGGGTCTCGGAAAGTGAAGAGATGCTCCGGGGCAGTGTG       | 4 |
| wt-46710-46830 | 1814 | TTCTCCAGGGCAGCTCCCAACCCCTCTGCACCGTGAAGCTGCGCCACGGACAGATTTACCACCTGGAGTTTGTCTACAAGTTCTGGCCTTAAGCTGAAGAAGTGAACCTACCCCTCC        | 4 |
| wt-46830-46950 | 1815 | TCGCCGTGTTTGTGATATCCAACAACGGCCTGGCCACACCCCTGAGGTGCTTTTGCACGAGCCGTGGGTCTCAGATCGGGCCAGAGCGGCCCTTGCCTGGTCTCTCAACGGATGTT         | 4 |
| wt-46950-47070 | 1816 | GACCTACCAAAAGAACTCCATCATTATGTGGGCCAGGATGACTTCATTAAGTTAAAAGCCCCCTGGTCTCCCTGCTGAGCTGATCTCCTGAAATCTATGGTGGTCTGCCGGCCCTAC        | 4 |
| wt-47070-47190 | 1817 | ATCACGGAACACCCGACGACGATGCGATTTCTGGTGTTCAGGCCGCCAACCCCAAGGCGCTCGCGGGTATGATATGATTAGTATGATGTTCTCAGCAACTGTCTCGGTCTGGTCAA         | 4 |
| wt-47190-47310 | 1818 | GTCGAGGATACGGCCGCCAGAGTCACAGGTGAGGAGTCCAGGCTGGCCGTCACGCACTCGGGGTGCTTGGGACTCACACGTTAGGGGGCGCGTGGTGGGACTGGATAACTTT             | 4 |
| wt-47310-47430 | 1819 | TCAGAAGCTGAGACCGAAGACGAGGCGAGTTACGCTCCTGGAGGACAAAGACTCGTGGTCCGAATCCGAGGCGGCCCTGGAAGAAGGAAGTCTGAGGCACCCCATCCGCAGGCAC          | 4 |
| wt-47430-47550 | 1820 | CGGACACGCGAGACTCGCCGATGCGCGGGAGCCATTACGGGTGGAACAGCTGCCCCCGAGACCCGGGAGACGGTGGTGGGGGAGCATGGCGTTATCTTGGCGGCCACACCTTAT           | 8 |
| wt-47550-47670 | 1821 | CTGGCAGGGTCTGGCTGTACAGGCCGTGGCCCTGCTCCTGATGTTTCTGAGGTGGACCTGACGTTGCAAGCCCTTGGGAGCGGGGGTCTCCAGGCTCCTGATCTGGGGCTGGCCT          | 8 |
| wt-47670-47790 | 1822 | GCCTGACTGAGCTATGTGAAATGAGGGAAATTTGTGGTTTTGGGCGAGGCCCAAGCTCTGAGGCGCTGCTGCGCTCTACGCCAGGCTCGCTTTCCGAAGCCACTCGTCCGCCTACT         | 4 |
| wt-47790-47910 | 1823 | GGTTGTGAGGCTGGAGAGCCCGGGGCTTTGTCCGCTGGCCAGTGCACAGCAGCCCTCAGCCCTGACCTGACCCGCCCCCTCTGGCCCTCCCTCTGGCCCTTTGACGTGCTA              | 8 |
| wt-47910-48030 | 1824 | CCGGTGGTGGTGTGAGCCGTGGCCCTTTTGAACGCCCTTTTCTAGCTTATTTTTGGTTGTGCGGCTGTTTTCCCGCGTTTTCCGATAGAAATAGCTCGGATCTGCGACCGGT             | 4 |
| wt-48030-48150 | 1825 | CCCCTTTCTGCGAAAACACCCGGGCGTGGCCAGGGTTACCAGGCGCTCGTGAAGAGTTCTTGGCATTCTGTTGAGCGTAGTAGCTATGACCCCCCTTGTGAGGCAAACTCTA             | 4 |
| wt-48150-48270 | 1826 | GGCCTGTGAGGCTGCTTTGCCATCAAGAATTATGTCCCGGCCTGGACTCACAAAGCTGTGTGACGGTCCGAGCTTCTCCCGCTGGGCCAGTCTACGCCAGCGACTCGATCCCC            | 4 |

|                |      |                                                                                                                         |    |
|----------------|------|-------------------------------------------------------------------------------------------------------------------------|----|
| wt-48270-48390 | 1827 | GGGAGATTGCGACAGAGTACACCAGCGACTGCACCTTCGTTCTGGTGTATCATGCTCGGCTCTATTGGCCTCCCTCCAGAAGAAGCGCTCGACACCCCTGTGGGAATCCCATTC      | 4  |
| wt-48390-48510 | 1828 | AGTGGATGTGGTACCCTGTTGGTAAACTCGTGCTGAGGAGTGCCTACTGTTCTGCTATACCTGCCGTCTGAGGGGGGAGAAAGACGGCGGGGGCGTAGGGAGGAGCTCG           | 4  |
| wt-48510-48630 | 1829 | TGGGGCCCGGGGGCCCTGCCTGAGCCGGGATGTTTTCTGGCGATCGTAAGCCGCAATGTTCTCTGCTGCTGCTGAACGTGCCTGCCCGGGTCCCGGGCTACAAGTGTTCAGAT       | 4  |
| wt-48630-48750 | 1830 | CCCACGCCTCCAGACCCGGTGTCTGGCCCGGATTACCTCCCTTGGCCGTGTTTGCATGGACTGCGGTACTGCTTGAACTTGGAAAGCAGACAGGTGTAGGAGGCAGGCTCAATTCTC   | 4  |
| wt-48750-48870 | 1831 | TTAGACCCACTCTCCAGTTTTATCCCCGTGACCAGAAGGAGAAGCATGTGCTGACCTGCCATGCCACGCGCCGTGTACTGCTCCAACCTGCGGCTCTGCGCGGTGGGCTCGCAGGCG   | 4  |
| wt-48870-48990 | 1832 | TGGCTGAGCCACCAGCGCCCTCGGCTGGCGCCCGCAATCCGGCAGTGTCTGCCACACAGCCGGCTAGAGCTGCACCGTGGCTCCCGCTCTGGATGCCATCACCTCTGCT           | 8  |
| wt-48990-49110 | 1833 | TGGGACCCAGCCGCACTTGCATGCGCGCGGTGTCTGCGGGGGTGCAGCGTGCAGGCACTGTATTTAACTTTGCGGACAGAGGCCAGAGCCGTTGCTCCATCTGTGAGCAACGCC      | 4  |
| wt-49110-49230 | 1834 | AAGCTCCAGAGGACGCCCGCAGCAGCCTCACCTGTTCTCCTCTGTTAGAGGTAGAATTGCCACCTGGTGAACGGTGTGCGGGCTGCCGTCTATCAGACGCGTTATGGCACGCCGG     | 4  |
| wt-49230-49350 | 1835 | CTGCCAAAGCCACCTCCAGGGGAGGCTGGAGGCGGATTTCCAGACAGTCCCTGCTCTCAAATTTCAAGAGCTGAACCAGAAATATCCCCAATGATGTTTTCGGGAGGCTCAA        | 4  |
| wt-49350-49470 | 1836 | AGAAGTTACCTGGTATTTCTGACATCCCAGTTCTGCTACGAAGAGTACGTGCAGAGGACTTTTTGGGGTGCCTCGGCCCAACCGCCATAGACAAGAGGCAGAGGCCAGTGTGGCTGGG  | 4  |
| wt-49470-49590 | 1837 | GCTGTGCTCATGCACACCTTGGCGGGTATCCGCCACCCCGTCCAGCAGCTCAGGCCGCGCATCCGCTGGACCGGGGCTTGGCATCATCAGCGCCGTCCACGGCCGTAGCCCG        | 8  |
| wt-49590-49710 | 1838 | TCCGCGACCCCTCTGTTTCTCATCTATTAGCAGCCTCCGGCGCGGACTTCCGGGCGGACTGCCCGCCCTCCGCCCGCCGACAGCCGTCGATACCCGGTCAAGTGGCGGGGACAACCC   | 8  |
| wt-49710-49830 | 1839 | CACGACACCGCCACGCGGGGACGTAAGAAACAGTAGAGGGCACGAAACATGGTGTATGCACCTTATTATAAACAATTACAGATACAAAACTTGTAGTCTCTCAGGCTCGCGATGA     | 4  |
| wt-49830-49950 | 1840 | GGCGGTGGGTGGAACGCTCCAGCTTGGCGGAAGCTGGCTCACGAAGCGAGACAGTACTCGGCTAGCCTGACTAAGGGTGAAGGCTATAACGCGAGTCTGTTCCGGGGCGCGGTGGATA  | 4  |
| wt-49950-50070 | 1841 | GAGAGGAGGGGATCCGGAGGGGACCACTAGTTCGCCGGAGGTTCAGCCCTCCTGTCACACCTCCCTGATAATGTCTTCAATAGACAGAAATTTGGGTGACCACTGAGGGAGTGTCCACA | 4  |
| wt-50070-50190 | 1842 | GTAATGTTGCTGCTGCTAGATGGCGGGGTGAGGCCACGCTTTGCGAAAACGAAAGTGTGAAAAGGCGCGGATAGCGTGCCTACCGGATGGCGGGTAATACATGCTATCCTTAC       | 4  |
| wt-50190-50310 | 1843 | ATTTTGGCATTTTGGGCAGCTGGGAGCGCGGATGGGGTGCCTTTTCGCACGGTGTATGTTTGGGAGCCCGCATGCCGGTACTGGGATAGCGCACCTCGGGCCGCGCCAGGCT        | 4  |
| wt-50310-50430 | 1844 | CCGAGCCGGAATGCATTGGGGGCAATGGGATTGCGGGGATTGTGCTGCTGCTGCTGACAGGGAGAGACACGCGCGGGGAGATGCAGCCAGCGCGGGGCGCGGTGGGCTGCCCCC      | 8  |
| wt-50430-50550 | 1845 | GAGGACGGCGCCGGCCGACGCGCCCGTGGCCTTTGGCACGGGCTGGCACCCACCGCTTTAATTGTTGGGGTGGGACGGCAGCTGCATCTTGGGCTTTGTGCTTGGCTTTTT         | 8  |
| wt-50550-50670 | 1846 | GGGGCGCGGTGCCAATGCACAACTGGGGTGTGCGCCGGGCGGCAAGCCGACCCAGGGCGGGTGCCTGGGGATGGGAAAGCCGACGCGCTTCCCGGGTCAACGCTGGAG            | 8  |
| wt-50670-50790 | 1847 | TAGCGGAGGCTGCTGCGCCGGCGCCACCGGGCGCACGGGTCGACGCGCCGACGGCCTGGGGAGGCGGGTGGCGGAGGGCCGAATCTCCCGGCTTCTCCCGCCCTGCTGTT          | 12 |
| wt-50790-50910 | 1848 | TCTTCCCGTTGCATGATAGATGGCCATAGGGTGGTCTGAGAGAGGCTGTGTGCTCGGGCTGGAGCCCAAAGTCTGTTAAGATGCCGCTGATGGTGTGGAGTATGCCTC            | 4  |
| wt-50910-51030 | 1849 | CCGTGCTGCGCCGGCTTGTAGGGGCTGAGGGTGGATAACTGGGCTTGTGAAAGCCCAACCTGGAATCTGGATGGTATGTTTCTTGTGACCCGAGGCAGTGCATGGTGTAG          | 4  |
| wt-51030-51150 | 1850 | AGTGTGGAGCAATGTGTAGACGATGGCCCTTGTTCAGAAAGCCAGGACTTGAAGGGGCTGTTGGTGTGCTGTTGGGAAAGGAGCTCCAGGAAATCTTGGCCATGGCTTGGGG        | 4  |
| wt-51270-51390 | 1852 | CGTCCCGGGGGAGGAGGTAGGAGACAGCCAGTCCCTGGCCCTGCCAGGGGCCACCTTCTAAGAGGGGGCTCTGTGGCTGGGAGGGCCAGAGCCCTCAGATTACGAGTAGTGTCTC     | 8  |
| wt-51390-51510 | 1853 | CCTTTCCCGTGGTCCGCTCCCTCCTCCCACTGCTGGAGCCGGTCCGAGGAGGGCCGGGTGTTATCTGCTGACTGAAACCCGTCGCCGCTGACCACTCCGTGCCCGCCACCTTGGG     | 8  |
| wt-51510-51630 | 1854 | GGAAACCGGAGAACAGCTCTGGACGTTGCGTGGATTGCGGGGAAGTGTATCCAACGGCAGCTGGAGGATCTCGTGCCTGTAAGAAGGAGGGTGTAGTACATCGGTGGCCATCGTG     | 4  |
| wt-51630-51750 | 1855 | AGGCCCGGCGCGTAAAGTAGAACCTGCACGTCGGCAGATTTGCCGATAGGTGAAACACTTCCAGATGATGTTTTCTGTTGGCCAGGATGGCCAGCTGGGGGCGCCCTCCT          | 4  |
| wt-51750-51870 | 1856 | TAGGTTGGCGCCCTGGCTCGGTGAGAAGCTCGCGTAGCCACACGGCTGGCGTCAAAGATGGACATCTCGCTCGAAAGACTCGGAGTAGCCGTCCAGGTCCTGCAGAAAATTCA       | 4  |
| wt-51870-51990 | 1857 | GCGAGATGGTCTCCACAGGGACCGAAGGGCTCAGAGTCCCGTCCGAGTAGAGGAGGGAGAACACCCCTGACTGTCCAGGGTCTCAGTTAAACAGATATTGAGAGGAGACAA         | 4  |
| wt-51990-52110 | 1858 | AGAGAGTTAGGGGCGACCGAGGAAGGCCCGCCACGGCCGCTCAAAAACGGAGACGGGATGGTGTACCCGAGCCCTCTTAGGACCGGTAATGGGAGTGCCATAAGGCATAAGAT       | 4  |
| wt-52110-52230 | 1859 | TTCTCAGGGCCCGCGGTAACGGTCCGTAGGAAGACGGGTTTCGCGGGGACCTCGACTCCCTCCCGCTGGGAGCTTCTCCCGTGTATAGGCCTGCTTCAAAAGTCGCGC            | 8  |
| wt-52230-52350 | 1860 | GGTAGTCCGAAATGCAGCCGGCCCTCCAGCGGGCAGCAATGAGTGCACAGCTGCTGAAGGGCTCGGGGCGCAAGCACCCGGCTGCAGGAGCAGCATGCAGGCTCGGGCGGGCCG      | 8  |
| wt-52350-52470 | 1861 | TACTTTGGTGTGGACCAGGCCAAGAAGTCCGGGTGCGGCCAGAGGGCGGCTCGGGTATCCATCTCCTCCAGCGCTCTGGAAGAAGATGAAGCCGGTGGTGGACCGCGATGCGGT      | 4  |
| wt-52470-52590 | 1862 | GGCGGTGAGGCGGCGCGCTTCCCGTGTGCTGCCGCGGTGGTTGAGGGCATGCCCCCTCCCGGAGGCTGGACTCCTGACCAGCCTGTAGGTGAGGACCGAGTCCGACAGGA          | 8  |
| wt-52590-52710 | 1863 | GGTCTCCAAACCCCATCTCTCGCTAGAGCCGAGACAGCCGAGTCCCTGCTAGAACGATGGGGCGCCAGGAAGCGCGCAGCGTAGCCGGATGTGTGCCACCGACGCGCCATCA        | 8  |
| wt-52710-52830 | 1864 | TCTCCGTTGTTCAATAGAATAACTTCCCGTCTGTGGCCGGGCTGGATAAGGGGGTATTCTAGAGGCGATGAGACTGGCGTGCCTAAAAGTGCATGGCCACAATGGGGTGT          | 4  |
| wt-52830-52950 | 1865 | CTGCCAGGCTTCCATCAGGGCTTTGGGCGCAGAGACGATTTCCGAAAGCAGCTCCCGCGCTGGACTCCACGTCGGGCCAGGTGCCAGTAGGAGTGGCGGGCGGGCGCTGAGGC       | 8  |
| wt-52950-53070 | 1866 | GGGCGAAGCTACACTGGCCAGGGTCTTCTCCTCCTCTTGGTATCCTGCGGGGACCAATAGTGTGGGGCGTCCGGTGGGGTCAAGGAAAGGCCTCTGGTTCTCAGCACGG           | 4  |
| wt-53070-53190 | 1867 | TGGGCATGACATATCCAGAAGTGTGGTAGAGGGGATGAGTTGAGCGGCTCTGGGTGCTGCGGAGAGCTAGCCGGGTTAAGGGGTGCGAGGGAGACTGTTTCCAGCCAGA           | 4  |
| wt-53190-53310 | 1868 | GGTGCCGCGTATTTGCGCCGGCCCTCCCGCCGCGAAGAAATGTGCCCGCGGGTGGGGCTCCATTGCCCATCCAGTTGGTGGTGGCGAAATCGTATAGGAGGGGCGAGTTGTTGG      | 8  |
| wt-53310-53430 | 1869 | TCAAGGGATGCTTAAACGAAAACGGTAGGCTGGCGGTCTCGTAAAAGCCAGGAAACTGCTTGGCCGAGGCATAGCCGAGCAGCTTGTCTTGGAGGGGCACTGGGAGCCAGCCG       | 4  |
| wt-53430-53550 | 1870 | AGGCCCAAAGCCAGCCCTGACGCTCCACACGATCTTGGCTGCGCGGGTGGTGTGGCCCTGGCTGGGTGACCAGATCCTGCAGCCTTCCCTGCAGCTGGGACTTCTCT             | 8  |
| wt-53550-53670 | 1871 | GGCCTCCTGGATGATGGCTCCAGTGGGAGAGGGCCCTTTCCAGTCTGCGACGGTCTCCTTGGCCCGCGACCCGCTGGGGTCCAACGTGGCCAGACCACTCAGCTCCTCCA          | 8  |
| wt-53670-53790 | 1872 | TGCCATCCATGGAGTTCTGGCCATGCCCTCGACTCCAGGAGCCGTTAGCTCATGAATTCACCGTCAGCCGACGCGGCTAGGTTACGCCAGGCACCCGCGCCCGCAGCTAAGGCCA     | 4  |
| wt-53790-53910 | 1873 | GGGCTCCTTCGAAAGACCCCGCACGGCCTCGAGATGCCCGGATCCACTTGGCGCTGCCAGGGATTTCCGGTAGGGCCATGAGCCGTTCCCGCCGCTGCCCGGGCCAGGGCGGCT      | 8  |
| wt-53910-54030 | 1874 | CGAGGGGAGCCTGGACAGGGGTTGGGCGGGAGGGAAGCAGGCTCCGGAGTTCATCGTGGGGGCTTCGTCGCTGACCTGGAGAGGACGGCTCCAGAGCCGTGAAAGCCCGCC         | 8  |
| wt-54030-54150 | 1875 | GAGTGCCTGCCCATCTGCTGGGCTTCCGATCAGGCTGCTGCTCCTCCGACCTGCTTCCAGCGGCTCGGCGCTCGGCTGGTACCAGATCCTGCAGCAGCTCCGAGAGGAGTCCC       | 8  |
| wt-54150-54270 | 1876 | CCGTGCTGGAGGAGATCGTCCCGCTCTGCTGCTGACGACGCTGGGCTTCTAGCCGAGAGCCGCGAGTCCGAGCCAGCCTGGCGGGGCGGTTGCTGGGGATAGTTGGAGGAG         | 8  |
| wt-54270-54390 | 1877 | GAGGCAGTTAGCCTGGCCTGGTCAATAGTGGCTTCCGGTAGCGTCCGATCCAGTACTGCTCAGCATGGCCGTAGGGCAGCCTCGGCTGCTGCTTTTTCCAGAAGCCCGCCA         | 4  |
| wt-54390-54510 | 1878 | GCCCCGCTCGTACTCCGCTAGGGGGCTCCAGATCCGTGTTGACCACCGCTGATTTTCATGCTCCGGGACTGCAGGGCCTGGCGCTGCGCGAGGGCCGAACCGATGGCATCGGCCG     | 8  |

|                |      |                                                                                                                        |    |
|----------------|------|------------------------------------------------------------------------------------------------------------------------|----|
| wt-54510-54630 | 1879 | CCGTCTGGCGGAAAGAGGGCCCCGGCGCTTCTCCGCTCTCGCCTCTCTCTTCTTGGCGGTAGCCGGGGGTGGCGGGCAAGCGTCCAGTCTGGCCAGAGGGCCGGTCT            | 8  |
| wt-54630-54750 | 1880 | CGATATCCGTGAACCAGCCGGGTTCCGGCCCTCAATCTCTCCGCCACCAACATCGTCCACGAGCAGGATCGCAGTCTCTCCCTCTCACCTCGTATTCCCAATAGCATAGCGG       | 4  |
| wt-54750-54870 | 1881 | CAAGGATCTGTGTAGGGAGTCCAAGATGTCCTGTCTTCTGGCTACTGCCGCCGCTGCTGCCGGCTGAGTCCGATTGTCTGGCAGCAGGGAGGCCAGCAGGGTGTCCAGTCACTCGG   | 4  |
| wt-54870-54990 | 1882 | GCGAAGTGGGAGCGGGCTCTGGCGTGCCGCCAGCGCCTTCTAATTCTGGCCAGGCGCTATTGCGCTCTCGCGCTCGCCGCTCTGCCTCTCTTGTCTTCTCGGAGCTTCT          | 8  |
| wt-54990-55110 | 1883 | CCTTTTCTTGGCCCCGTCTCCATAAGCTGCCGACGCTTCTTCATACTGTCCGTGAGCTCTTGTGGGGGAGTGTCCAGAAAGGCCCTCGAGCTGTTCTCGGTGGCGGGCTTAA       | 4  |
| wt-55110-55230 | 1884 | AGCCTTCGGCTCCAGCGCCAGGCTGCACCTCTCTGTGAGCTGATCGTGTGTTATTTCAATTTCTCAGTAACCTAGGAAGCGTTTCTGAGCTTCCCTGGGATGAGCG             | 4  |
| wt-55230-55350 | 1885 | TTTGGGAGAGCTGATTCTGCAGCCAGAGAGTAGTCTCAGGCACTCTCTCAGGCTAGCTGTGATCGTGCATCATTAGACCCGCACTAGACCTGGGAGCAGATTACCCTCGCGGCC     | 4  |
| wt-55350-55470 | 1886 | TCTCTTTAAGGTGCTGTGAGTAGCAAAATCTGCAAGGCCACTAGGCGCGCTGGCTCCAGCGTCCAGCGGTTGCCATCTCGAATGTGTGCAGGGCTCTGAGACCATGGGTCCAGGA    | 4  |
| wt-55470-55590 | 1887 | TGCGGTCAATGCCATCTGACCTCAGGCTCAAGGACCAGGCAAGTACGATAGAGGTGGTCTATGCTCTCTCGAAGGAGGCAATGAGTTATCGATGGTGTAGAAAGGTGATGATTTCA   | 4  |
| wt-55590-55710 | 1888 | GGATGTCATCAGTACTTTTTGGAGCGAAACATCTGCTGTATAGTGTACCTAGCGGATGTACGTGGGGTCTTTGCGGCCCGACTATGACCCATGCAATTTGGATGTACTTTTCTA     | 4  |
| wt-55710-55830 | 1889 | TGACGGGATGGTGAAGGCCGCGTGTCCGCCAGCGTGGCTGGCTTGGGTTGCTGGTGTGGCGGTTGTCGACAGGAGGAGCGGGAGAGATGGGGCGCTGGGGCCGAGGCCA          | 8  |
| wt-55830-55950 | 1890 | CACCGGCCAGGCCAAACATTGCCGTGTCGTCAGGATGGTGGCAGGCGCTTTCGTTTTCTGTTTTTCCGACTCTTCTGTTTTTCCGAAAGG                             | 4  |
| wt-55950-56070 | 1891 | GGCAATGCTGGGTGCTCTCTCAACTCGCTCCAGGGCCAGGGGATACCGCTCATACTAAGGGCGGTGCCAGGTAGAGGAGCTCGCATAGTCCATTCAATGGACGTGTACC          | 4  |
| wt-56070-56190 | 1892 | GGATGTTTAGGAGAGGCGAGGGAGCGATGATCTGGCATGTGTGCCGAGGTGTGTGAGGAGTGTGCAAAATCCATCACTGTTGGGAGGCTTGGTCTCAAGTAGGAGAGATAATCGG    | 4  |
| wt-56190-56310 | 1893 | AGGCCGCCAGGCCACCTTGTCCCTGATGTCCGCCGTACACCTGCCACGTGCAGGGCCGATCTTGGACCGGACCGCCACGTTGTGGACAAAGGGGGGCACTGAGGCCGGGGAGGGG    | 8  |
| wt-56310-56430 | 1894 | CCCCATACTATCGTGTCAACAGCGCCAAAAGCGGACGTCTCTCATCTACCCAGCCTGTTGTCTGGCCAGCGCGTTCGGCGGCCCTCCGCCAGGGATAGGAGGCGCTTCCAGC       | 4  |
| wt-56430-56550 | 1895 | TTTCGTCTCAGGACCAAGGGGACGTCACCTGCCGGCCCTGTAGATGGAATATCCTCGGTTCTCTCTCTTCCCCGCTCTGATCTCCGCCGAGAGCAGGTGCGTCAAACTCTGGAAGG   | 4  |
| wt-56550-56670 | 1896 | GTCTGCGGGCCGCTCCAGGTCAAATTTCCATCGTCTGCTCGGCCAGCTGGGAAATTCAGCCAGCATCTTAGCACCGGCATCTACAGGACCGCGTCTTCTGTTGCCAGGACGGCA     | 4  |
| wt-56670-56790 | 1897 | GGCAGGCTCCAGCTTGGCGCCAGGTGCTTATGGAACCTCCCGCTCTCCCTTGTGTTTCTGATAGCATGTTGCGAGGTTTGGATGTTAAGTTCCGAAGTGAGCAGTTGCTCCAGGT    | 4  |
| wt-56790-56910 | 1898 | CCAGCGTGGGGACCTGCAGATGTCGCCAGCAGTCCCTTAAAGAAATCCAGCAGATTAGCACAGACGATCGTCCCTACTCTTATTAGCCCTGCTCGAGGACCACTGTCAAGAAGAT    | 4  |
| wt-56910-57030 | 1899 | AGTCTATCATGCTCAAGGCATCTCGCTTGGCACTTCCCGTTAGAGGCCGGTGTAGACGATGGCCTGTTCTGGTAGGATGTCCGGCTATTCTCGCAATGTTGCTCTCGAGGGGA      | 4  |
| wt-57030-57150 | 1900 | CAAAGCTCATCTCAGGAGTCTATGTGCAAGAGTGTCTAGATATTTGGCTCTGGCGGTGTCAGGTGTGATGGGGGACGTGGGGCACTGGATCCCGATCCAGGCTTGGAGAA         | 4  |
| wt-57150-57270 | 1901 | CTTCATCTCGAACATGTCTTATCTCTGTGGTGGGGATATCGGAGGCTAAGTCTGCTCTCCGCTTCTCAGAGTGGACATGGATAGGAAAGGCTCCTTAGGTGAGACAGGTAGCGGA    | 4  |
| wt-57270-57390 | 1902 | CGAGGCCAGAACCCAGATGCATCATCCCAAAGGAGGGCTGCTGCCGAAGGAGGTGATGGGATATCTCCGTTCCAGCCCTGTGAGCGCCGGGGATGGTTTTTCTGTTCTGA         | 4  |
| wt-57390-57510 | 1903 | GTGTCGTGGCTGATGGTGGGAGCTGCTGAGCAGGAGGAGGAGCCGGGGTAGCTGATGGCAGGGGCTGCTGCTGAGGAGGAAGAGGAGAGCCGGCGGCTGATGGCGGGGCTGCT      | 8  |
| wt-57510-57630 | 1904 | GCTGAGGAAGAAGTGGAGAAGGAGCCGGGGCGGCTGATGGCGTGGGCTGCTGCTGAGGAAGAAGTGGAGAAGGAGCCGGGGCGGCTGATTGCGGGGGCTGCTGCTGAGTTGGAGGAGG | 8  |
| wt-57630-57750 | 1905 | AAAGAGTCGTGGTGGTGGGGCTGCTGCTGCAGTGGGGAAAGGGATGGGGTGTGAGAGGATTTTGGGTTGAGGGAGCTGCCTGTGCCAGAGGATGGGTATTGCAAAAGGAGG        | 4  |
| wt-57750-57870 | 1906 | GAGGAGATGAGTGAAGGAGGCTGCTATCAGCACCGGGCGTCCCGCCGCTCCCATCACTGGACACAAGCTCGGGCCCAACAGGTCAAAGCCGCTGCCGTTGGCTCATAAAAGT       | 4  |
| wt-57870-57990 | 1907 | GGGGCGATGGGGCGAACGTGGGTGCGTGGCAGCTGATCATCTCTGTGTGAGTGGTGGAGGACAGAGGGAGGGCGCGCCGAGGTGGGCTTCTTGGGGGCTATCTTTGCCAATC       | 8  |
| wt-57990-58110 | 1908 | CTTTTTCTCTTGGAGTCTGAGGCGCTGCCCGCTCGACGCCCTTGGTGGCGTGGAGGGAGCGGGACCCCGGGGTGTGACCTAGGCCGGGGATGGGGATGAAGAGGGAGGGCTGG      | 8  |
| wt-58110-58230 | 1909 | AGGCCGGGGCCGAGGCGGGGGCCGCGGAGGCCGGGGCCGCGGAGGCCGGGGCCGCGGAGGCCGGGGCCGAGAGGCCGGGGCCGAGAGGCCGGGGCCGAGAGGCCGGGGCCGAG      | 16 |
| wt-58230-58350 | 1910 | AGCCCGAGACGACGCGGGGAGTTGGTCTTTGCAAGACTATACCTGGCGCAGGGAATGAGTCCGATGTGAAAGTGCAGAGGGCAGTGGCTGAGGTTATACGGTATTATTCGCGTT     | 4  |
| wt-58350-58470 | 1911 | CAAACGGTAGCATGACGGGAGGCTGCTATCAGCACCGGGCGTCCCGCCGCTCCCATCACTGGACACAAGCTCGGGCCCAACAGGTCAAAGCCGCTGCCGTTGGCTCATAAAAGT     | 4  |
| wt-58470-58590 | 1912 | CATACAGCCATAGTGTCCAGCATAAAGATGCGGGGGTCTCTGTCTCAAAGGCCCGGGTAGAAAATAGAGATGCACGCAAGTGTACTGGGCCCTGGTGCCTCCAGTACTGCAGGA     | 4  |
| wt-58590-58710 | 1913 | TGTCGTGCGCATAGGTGCTGACTCTGACATGGCGGGGGTCCCGGGGCCGATCCTTCTGGCAGTGGGGTCAAACAAGTAGAAGGAGCCATCTGTCTCGATGATGATGGCCCCCGCT    | 4  |
| wt-58710-58830 | 1914 | AGATGTCGCAGATGTAGAGGATGAACTGGGCCACCCGTTGTAACCTGCCGTGCAGGACCTCGGCCAGGACTGAACAACCTGCCAGTTTGCATCTGGGACGGGAATAGGACAGGGCAA  | 4  |
| wt-58830-58950 | 1915 | AGATCTCCCGAGCGGTATATGTGCACGCGCCACCGCCCTCAGGACCAGGAGCTGGGCACGTCCTCAACTGGGCCATCTGTCGCCCTTGGAGTGGCGCTCTGGCGCATGAGGG       | 8  |
| wt-58950-59070 | 1916 | CATCCAGCCGCGCCCTCGTCCAGGACCTCGTCCAGCTCAGGGCGGGAGGTGAGGGGGCGGCCGCGCCAGGAAGCTCTTGACCAGTAGAGGACGCAAGTGTGACGCACTGATGCCGG   | 8  |
| wt-59070-59190 | 1917 | CAAAGCGGCAAACTGCAAGTGGGCTGGTTGCACGAGGCCGTGCCAGGATGCGGAGGGCCGAGCCTCCACTCCCGCCCGGGGGCATTACATCCATGGTCTGATCCGCGCACGG       | 8  |
| wt-59190-59310 | 1918 | GGCCGTTCCCGGGTGGCTGGCTTTGCCCCAGTCGCGTACTCATCTCGGGGTGGGGGGGAGGACGCTTGTGCCCCCTTCTGGTCCGGGTCTTACCGGCTGGCGCG               | 8  |
| wt-59310-59430 | 1919 | GCAGCCGCCAGAGATAAGGGGGTACGTGTGTGCTCCGCTCTCTCTGTCTGGCCGCGCCGCGCTTCCCGCCCTGAAGGAGAGGGGGTACTCCGCGGACTGCGTCTCGGGGG         | 8  |
| wt-59430-59550 | 1920 | CAGGAGTCTCAACCTTCTGGCTGGGGCGCGGTTGCATATCCGATGGCCTTCCCTGTCTTCTCTGATGCTCTCTCTCTCTCCCGGCACGCCCCCTGAGATCTGCCTCCCT          | 4  |
| wt-59550-59670 | 1921 | CCCTCTCCCTGCTGCTCGGAAAGTCTGAGGAGGAGAAGGAAATGGGGAGGAGTCCAAAACGCGCACGCCACCTGCCGTGGGGCGGTGGTACAGGTTCCCGCTGGCCGGCGCTTG     | 8  |
| wt-59670-59790 | 1922 | CTCGCTTCTGCGTTACCCAGGAGAATGGCCGAGTTTTTTGGCGGGGAGGATGCGGAATGGCGGGCGTTTGTCCACGGGTGAGGGGGAATCGTGGTTAGGGCCGCGCAGGG         | 8  |
| wt-59790-59910 | 1923 | TGGTGGTCTGACCCGGGCGTGCAGCAAAAGCGGCGAGAACCGAGGGGCTCTGGGGTACTGTGATCTGTTCCGGAATTAGGTCATGGCGGTGTGATGTTTAAAGGGGTG           | 4  |
| wt-59910-60030 | 1924 | GTCTTGGCGCGCAGGATGATGGTGCAGGACCTCCACAGGGCCTTGCAGATGCTTGCCTAGATACAGGATGTCGTCCATGCTGAGGGGAGGTGGGGTGTCTGCTCCCGCTGCGGA     | 4  |
| wt-60030-60150 | 1925 | AGCCGCTGGGTGCGGGATGAAGACAGGTGGTGGCGGGCTCTCGCCGACTATGGCTCGGCACGCTCGCGCTGATGGCGGGTGGTGGAAACAGGCGGGGCAATGTGTAATCCCG       | 8  |
| wt-60150-60270 | 1926 | AACCGTAGGCGACGCTGCGCTGAGGGCGCCCTGACGCTGTATCCAGCTCCAGGCGCTCCACCCGCTGTTGAGCTCTCGAGATCCGACGACGAGGGCTCGTGGTGGCC            | 8  |
| wt-60270-60390 | 1927 | CAGAGGGGTGATCCGCTGATCCCGGCTCTCCCTGAGGGCGGACCAAGGAGGCCCTTCTGAGGGTGGCCGTGTCGGCGGTGCCAGGGCCACCTGGCGCGCGCTCCGCGCACACA      | 12 |
| wt-60390-60510 | 1928 | TCCTGGATGCCCTCCACGACGCTTTAGCTGTGGAGTCCGTGGAGTAGTGGCGGGGGAGGATGAAACGCTTTTTCTTACCCTACCACCGCTCTCTCTCTCTTCCGTCGCC          | 4  |
| wt-60510-60630 | 1929 | AGAGGATGTCACCTCCCGTCTCTGCTGTACAGGAGCGGGCGGGAGCACAGCTCCAAGTGCCTCCGAGAGGGTCTACCCGAGACCAGAAAG                             | 8  |



|                |      |                                                                                                                         |    |
|----------------|------|-------------------------------------------------------------------------------------------------------------------------|----|
| wt-60630-60750 | 1930 | CGGCGGGTGGCCAGGCCAACGACTCCGCCGTCGTGCTGTATCTCAGGGTGAAGAGGAGTAAAAGAGGGAGGTGGGCCAGGCAAGCGTGGTCTCCGCCGCCGCTCTGAAGCTGAG      | 8  |
| wt-60750-60870 | 1931 | ATAGTCTCGGAGATGATGCCTGAGACCTCTCGGACGGCCTCATGATCCTAAGGACTGCGTCTGGGACGACAGCCCCAGGGGCCCGCCCTTCTGCTTCTGCACCCCTCGGCTCCT      | 4  |
| wt-60870-60990 | 1932 | GCGTCCCCGGCCTTGCCCTCCCCCTCTAAGTTGAGGGGGCGCAGTCCGACCCCTGGGGGACTCCCAAGCATCGGAGGGGCCCGTCATAGATCTCCAGACGGTGGCGTATATGAGC     | 8  |
| wt-60990-61110 | 1933 | TCGAGAGGACGCGGGGCCCGGGTCACTCGGGGGAAGGAGGGCCAGGTCGCTGCCAAGGAGACACGCCAGCGAGGGCGGCCAGAGAGCGGGTTTTGGGCAGCTCGTTGGAGAGGACC    | 8  |
| wt-61110-61230 | 1934 | CGGCGAAGGGCGGGCCAGATTTGAACTCGATGAAGCGGGCCGGGAAGAAGGGGCTGTGGACATAGGCCGGATCCCGCGCCGCCGTTTGGCCGGCCCTCAGGGACCGGCAGTATGCTCCG | 8  |
| wt-61230-61350 | 1935 | ACGTCTGTCGGCGGGCCGCCACCGCTGCCCTCACTCTTCCCTGCTCGCCGGAGTAGGGGGGCTTACAGGGGAGGGCCGAGCCGGGGCCGGGGCTGCCACAGCGGG               | 12 |
| wt-61350-61470 | 1936 | CTGTAGCGGACCCATAGCAGAGACTGAGGAGTTCCGATGAAAGCTTCCCGCCACTGCTCATACTGCGCCCGGAGGGGGGACGATGAAGTTCGCGCAGAGGGGTTGCCGCCCAA       | 4  |
| wt-61470-61590 | 1937 | GGGTCGCGCCGCCGCCACACCCACAGCCGTCGCGGGCGGGGGCGGGCGGTAGAGGGGCCGCTGGTGCGCCGGGCTCGTCTGCCAGCCCTCGGCCCTCGGCCCGCAGTAGGCC        | 12 |
| wt-61590-61710 | 1938 | GCCCCGGCCACACGGGGCAAGCGGCTCGTGGGGCTCGCGGTGGGACGAGTCCGAAAAGTGCAGGGCAAAGCCGATAGACTCTCTAGGAGGGCGGGGTTGGCCTCGAGCCACCTCCAC   | 8  |
| wt-61710-61830 | 1939 | CGCGAGCGGGACACCCGGGGCACAGAGCCAGCATCATGGCTAGTCCCGCCACCGGTCGTTGAGCCCGGCCGAGAGCAGAACCCTGGCCACCTGCTCGATGGCGGCTGGAGAGAAG     | 8  |
| wt-61830-61950 | 1940 | GATGCCCGGCTCCCGCCGCTCTGCACACGAGCGGCCAGGCCCTCATCTGCGCCATCCCGCCAGGAAGCCCTCGATGACCGAGTCTGGACGCCGTAAGTCTGGTCCCAGAGC         | 8  |
| wt-61950-62070 | 1941 | AGGGCTCGGTACACATAGTCTGAAAAGAGGGCCCTGAGGGCTCCAAAAGCCGAGCCGGCGGCTCAAAGGCCAGGACGGGCACAGCCGACGGGGGGGCTTTGCCCGCTGCC          | 8  |
| wt-62070-62190 | 1942 | TCCGCGTACACGCCAGGATCTCTACCGCCCGCCGGGCCAGGGGACGAGGCCACCACGCTGAAAAGTACTCGGGGGGTTGAAAGAGACCACCACCGCTTCTTCCACCTCTCCC        | 8  |
| wt-62190-62310 | 1943 | CGCCGGCCCCCGCCCACTGTGCTCCACGAGTCCAGGCCATGGCCTTGATGTCGCGGGCGTGGGCTGACCTGCGCTGCAGCCGCCAGGGGTAGCGGTTGGTCTCCGGTATACG        | 8  |
| wt-62310-62430 | 1944 | GTGACACGCCATCTCCCAAGCCTGTTTTCCGCCGTTAAAAGCGTAGAATGACAGCCCTCCCGCGGGAAGCGTCCACCGGGCCAGATAAGTGTCCGCCACCGCTTCTCCACGAAG      | 4  |
| wt-62430-62550 | 1945 | GCAAAGGTGGCCGTTGGGCGAGAGCCGCGAGCACCTCCCGCTGCCCTTTCGATGATGCGCCGTTACGCGGCCAGGGCCCGGGTCTCTGCGATGAGCCGAGAGCCGTCAGCGGA       | 8  |
| wt-62550-62670 | 1946 | TCGTCCGTTGGCCGAGAGGCTGCTGTTGGGGGCGAGTGAAGATGCCAGCAGTCCAGGCGCCCTCCAGATGGCCGAGGCCGAAGCTGCGCCTGGA AAAAGAGGGCCCGCCGGAGTAG   | 8  |
| wt-62670-62790 | 1947 | TAGGCGTGGTGGCGGAGGACCGCCCGGGTAAGCGTGGCCGCTCATGAGGTTGAGAGTATTAAAAATCGCGCACCAGCACCAGGCTGGGCCAAATCCCCAGTCCAAAAGATCCCCAGC   | 4  |
| wt-62790-62910 | 1948 | TCCAGAGGCATCAGCGCGCGCAGGGGGCAGCGGGTCTCCAGACAGCAGCAACTGACGGTCAAGCGGGCAGCCCGCTCCACCTTGCAGGGGTGGCTGGGCTGTCGCCCT            | 8  |
| wt-62910-63030 | 1949 | CCGCTACCGCCCTGCTGTCACTCTCCATAGCGGACGCCATGAAGTCCAGGGGTCGTCGATGCGCCGCTGTGCAACGCCGAATCGCGGGGCTGCTGCCCCCTCCGCCCGGGCTCTA     | 8  |
| wt-63030-63150 | 1950 | AATATTTCCCGGGGTCGAATTCACGCGGGACGTTCTGGGCTGGTTGAGGAACACGCGCAGGCCCTCTCGTGTAGTGCGGCGCCGCTTGGCGCGCAGGGCTGCTGGCCCGGGGGG      | 8  |
| wt-63150-63270 | 1951 | GTGGCGCTGCCGGGGTGGCAGTGGAGGGGGGAGTTACGCTGGTCTGGGTTGGCGGGCCAGTCTTTGGGGGTTTGGGGGTTGATACAGCCAGCTCTTCAACACGCCCGCCAGTGA      | 8  |
| wt-63270-63390 | 1952 | ACGCCCTTTTCAATTAAGCAGAGTACCCGTTCTCGGGCTCGACGCGGATTACTCTCTCTCCCTGTTTATCTAATGAATACGCGCGGGGTGATCGCCCGGGTGGAGGCA            | 4  |
| wt-63390-63510 | 1953 | GGTGGGGCCTGACCGGATGGCCAACTGCTGTACGACAGCCCGCAACCTGGCTGACCTGGTCCCGGACTTTGGCGGCTGGTGGCCAGCCCGCTTCCAACTTCATACCCCT           | 8  |
| wt-63510-63630 | 1954 | GTGGGCCCTGGTGAGAAATAAAGAGCACCTATCTGAATAAAATCACACGGTGGTCCAGCGGCTGTGGTAGCAGAACGCCATCCCTCGCAGCAGCTCAAGGTGACGGTGGCCAG       | 4  |
| wt-63630-63750 | 1955 | GAGGCTTTGTGGATCTGGACGCGTGGCTCTCCGGCGGCCCGGGGGTGGCGGTGGAGTATGCTTCTCGTGGGGGGTGGGCTGCAGCCGTGCCCGCCGATGCGCGCTCTATGTCCGCT    | 8  |
| wt-63750-63870 | 1956 | CTGACTATGAGGAAGCCGGCCCGGTTTACGTTTTCCAGTCTCGCCGGCCACTCATGAGTATGAATATCTTAAGAAATTTACTACCATCCATCATGACCCGCTATGCTGTG          | 4  |
| wt-63870-63990 | 1957 | GTCCAGCCCTACATATAGAGAGCTAACCTTCGGGGCGGTTGCTGTCTGGGGACATTTAGTGTCTACTGACGGTGGAGGAGGTTGAGGAGGTTGAGGAGGTTGAGGAGGTTGATTACT   | 4  |
| wt-63990-64110 | 1958 | GTGGAGATTGACAGCTTTTATCCAAGCTCTGACTGGGAGGTGATTCTCTAGACTTAACGGGAGGAAACAGGAGGAGGAGGGGACAGAGCACA AAAAGTGGTTGAGTGGACCCAC     | 4  |
| wt-64110-64230 | 1959 | CACACAGCATGGCAACGACCATGTCGAGCATGAGCTCCTCTCCAAATGATTGATGAGTTAAAGGTCAAGGCCAACTCAGACCCCGAGGCTGATGCTCGCCGGCCGCTGCTCC        | 4  |
| wt-64230-64350 | 1960 | ACCGCTTAAGGCCGAGTCAAGTACACACAGTAGCCGAATATCTGGAGGTTCTTCTGACAAATTTACGATGAGGAATTTCCAGATGACCCGGGATGAGTGGAGACCCGAGTCT        | 4  |
| wt-64350-64470 | 1961 | CTGCTTTCGCGCAGAGCCCGCCTACGAGCCATGCTCCAGCGCTACTGTCGGCCCTGCTACTATGACACCTATGATGTTGGGGCGCAGCGGGAAGCAGGAGAGTGTGCAGC          | 4  |
| wt-64470-64590 | 1962 | ACTTTTACATGCGGTTAGCCGGTCTGTGCCTCAACCACTGCCTCACGCGGTTGCTGTCAGGGGACATTTAGTGTCTACTGACGGTGGAGGAGGTTGAGAGTGAATGAGGTTGATTACT  | 4  |
| wt-64590-64710 | 1963 | ACTTTGAGCACCTAACCTCCAGACGGTGTGCTGCTCCACGCCCTTTATGCGCTTTGCCGGGGTGGAAAATCCACTCTGGCCAGCTGCATCTCCACCACCCCGACCTCAGCTCCGAGT   | 4  |
| wt-64830-64950 | 1965 | TGATCAACAGCCAGTGGAGTACCACAATATGGCTGCAAGAGGGCGGTCAGTGTGGCGGCTACATGGAGCCCTGGCAGCAGCAGATTTCAAGTTTTGGAAACGAAGTGCAGGAGA      | 4  |
| wt-64950-65070 | 1966 | ACCACGAGAGTGCCTCGGCATCTTACGGGGCTTTGTCCCGGAGCTTCTTCAAGCTTTTAGGGACACGCCCTGTGCGGACTGGTACCTGTTTACCCCAAGGACCCGGGGAC          | 4  |
| wt-65070-65190 | 1967 | TGGAGAGGCTACGGGGAGGAGTTGAGCGCGAGTACTATCGGCTGGTACAGCGGGCAAGTTTTGGGGGGTCTCCATCAAGTCCCTGATGTTCTATCTGTAAGTGCAGGCTG          | 4  |
| wt-65190-65310 | 1968 | AGGCCGCGAGCCCTTTCATCCTTTTGAAGGAGGCGCTGCAACGCCCACTTTTGGCGCGACTGCAGGGCGAGGCCATGAACGCCGCCAACCTGTGCGCCGAGGTGCTGCAGCCCTGAGGA | 8  |
| wt-65310-65430 | 1969 | AGTCTGTGGCCACCTGCAATCTGGCCAACATCTGCCTCCCGCGCTGCCTGGTGAATGCGCCTCTGGCGGTGCGGGCACAGCGGGCCGACACCGAGGGGATGAACCTCTGCTGGCCCTCC | 8  |
| wt-65430-65550 | 1970 | CTCGACTCTAGTACCCCTACTGGAGAGGGGGCAGTGGTGTGATGATCTCGCTAGCCCGCTCAGAGATGCCACCCAGTGTGCCACCTTTGGTGGGCTGCTCCATTCTCAGGGAT       | 4  |
| wt-65550-65670 | 1971 | CCCCACTTATGATCCAGGATATGCGCTCCATGGGCTCGGGTGCAGGGCTGGCCGATGCTTTGCGGACCTGGGCTGGCAGTACTGACCTCCCTCTCGCTCGTTAAACAAGG          | 4  |
| wt-65670-65790 | 1972 | AAATATCGAACAATGACTTTACGGCCCTGCACCAAGTGTGATGGACTTACACAGGAAGATTTTCCGGGTTTCAACAGAGCAAGTATGCCGGGGGTTGGTTTCACTGGC            | 4  |
| wt-65790-65910 | 1973 | ACGATTGGCAGGAACAGACCTTTCTTATCCAGGAAATTTGGTCTCGCCTCTGAAACGCATTTGAGGAGTGGGCTTTTCAATTCACAGTTTATCGCCCTGATGCCACCTCAGGCT      | 4  |
| wt-65910-66030 | 1974 | GTGCCAGGTGACGGGCTGTTCCGACGCTTCTACCCCTTCTATGCCAATGCGTCCACCAAGGTACCAACAAGGAGGAGGCCCTTAGGCCAAACCGGCTTTTTGGCGTATGTGCGTC     | 4  |
| wt-66030-66150 | 1975 | TGGATGACAGGAAGCTTTGAATCTGTGGGGGCGGCTGCTCCTGCCTCCCGAGGCTCTGCGGCAGCGCTACTGCGTTTTCAACAGCCCTTTGATTACAACCAGGAGGACTGATTC      | 4  |
| wt-66150-66270 | 1976 | AGATGTCGGGACAGAGGCCCTTTGTGGACCAGAGCCAACTCACAGCCTGTTTTGCGTGAGGAAGATGCCGCGGGGCCAGCAGCTAGCCAACCTACTGGTGCAGACTACGAGC        | 4  |
| wt-66270-66390 | 1977 | TGGGCTGAAGACTATCATGTAATGTCGCTTGGAGGAGGAGGCGGCTGCGGGTGGTGGAGTGAAGGCCAGCGGGCTGTGCTGGTCCCGGGGAGGAACAGAAATGAGCGGAGTCT       | 8  |
| wt-66390-66510 | 1978 | CCGCTGACGAGATGCCCGCTCGTCCATGGAACCGCGCAGTTGCGGGCGGTTGACATGATGAGCAAGGGCCAGGGAGGACCAGTGGTGGTGTGCGCCGGGGATGGAAG             | 4  |
| wt-66510-66630 | 1979 | TGTGCTATAAGTACCGTACGCTTCTCAGAGGATGATCTGTTGAGACTGACGTTTTACTGAACGACCTGTGAATCTTCCAAATAAACGTTTTATTGCCATGTCCAAGTTGTTGACG     | 4  |
| wt-66630-66750 | 1980 | TGCGTATCATGAGGGCTTTGCCTGCCTAACGGTCAAACCCACCGCAACCGCTGGTTCCGGCTCACATTGCTCCTACCAAGGACTGCGGGTGTCTCAAGTACTCAATGAGAGGACT     | 4  |
| wt-66750-66870 | 1981 | TGGAGTTTTACAAGTCTCTTTACGTTCTGGCCATGCGCGAGAAGCTTGTGAACTTTAACTTATGATGAACGGTACCAGCTTCGAGAGCCAGCAGTATGACTACTACCCGAGC        | 4  |

|                |      |                                                                                                                         |   |
|----------------|------|-------------------------------------------------------------------------------------------------------------------------|---|
| wt-66870-66990 | 1982 | AGAAGGCCATGGAGAAGCTCCAGGGGAGACTTATGCTAACATTTAAACATGCTCTTTGATGGGGACAGGGCGGCATGAACGCCATACGCAGAGGCCATCATGGCCAGGAGCCCTGC    | 4 |
| wt-66990-67110 | 1983 | AAGCCAAGATTTCCTGGCTCCGTGACAAAGGTGGCGGCCCGCTACCCCTGCCGGAGAAAGATTCTGTGTCTGGTCTGATTGAAGGCATCTTTCTTATAGCTCCTTCTACAGCATAGCCC | 4 |
| wt-67110-67230 | 1984 | TGCTGCGGGTCCGGGGCTAATGCCTGGCATCTGCCTGGCCAAACTACATAAGTAGGGATGAGCTGCCACACCCCGCTGCCTCCCTGTTATAACAATAGCATGACAGCCAAAGGCTG    | 4 |
| wt-67230-67350 | 1985 | ACCGACCAAGGGCCACCTGGATCCAGGAGCTGTTTTCGCACTCGGTTGGAGGTAGAGACTGCCCTCATCGAGGCTCGTGGAGAGGGGGTACCTTGGTGGATGTGGAGCCATAAAGCAGT | 4 |
| wt-67350-67470 | 1986 | TTCTGGAGGCCACGGCCGATCGCATCTGGGTGACATTTGGTACGCTCCCTTTGATGGCACACCCACCCCAAGGACTGCCCGCTCACTACATGACTAGCATCAAGCAAACTAATTTCT   | 4 |
| wt-67470-67590 | 1987 | TTGAGCAAGAGATTCCGATTACACCATGCTGGTGGTAGACTACCTTTGAGTCAGGGTGGCTACTTGTCCAGTCTTCTGGGCATAAATCTCCTGCCTGCCTGTGCTGTGAGTTGGC     | 4 |
| wt-67590-67710 | 1988 | TTCTGTGCTGCTTGTGATCATGGAAACCACTAGACTCCTCCGCTTAAAGTAGCAAGGCCCTAGCCCTCTGTGCTCAAGACTATGACCATGGCCAGCTCATCTCAAGGGAGGATGCTGC  | 4 |
| wt-67710-67830 | 1989 | AGGTAACCTTCTGTCTGTAACATGAGAGGCCCCGCTGGCCGCTGGCCACGCAGGCACGGCCGGCTAATCAGCTTCGAGGCTCCTCCCTGACGCTGTGGCCAGTGGCAGAATC        | 4 |
| wt-67830-67950 | 1990 | ACCAGAGCCAGAGGAGGCCCCCGCCCGCTGTCATTAGAAACCTTGCCCTAGCCGCGACCTGTGCTGGGAAGGAGCTGTTGGCTCGGCTGTGGAGCAGGCTCCCTGCAAATTTT       | 4 |
| wt-67950-68070 | 1991 | ACAAGCGGCCACAAGGGGTTCCCGGCTGAATTTGTTAAGCTCACTATGGAATATGATGATAAGGTGTCCAAGAGCCACACCTGCACCCTGATGCCCTATATGCCCCGGCCAGCG      | 4 |
| wt-68070-68190 | 1992 | ACAGGCTGAGGAACAGCAGATGATGGCAGTGTGTTGATGCCAACAGCGCTTCCTGTTGACAAGTGGCACGCCAGCAAGCTCAGGCGCGTAAAGTGACACTCAATCCGG            | 4 |
| wt-68190-68310 | 1993 | ATCTCTACGTCAACCACTATACTTTAGGGAGGCCCTGCCCTACCTAGACTACAAGCCCTGAGTGTGGGCCATACGAGGCCCTCACTGGCCCTGTGGCCAAGGCTCAGGACTGGGGG    | 4 |
| wt-68310-68430 | 1994 | CCGTTGAGGCCACGTGTCTGCTCGGTAGCAGCGGACTCGCTGGCGCGGCGCTTAGCCTCTGCCGCTTCCGGCCGTTAGCGTGCCAATCTTGAGGTTTTACAGGCTGGCATCATAG     | 4 |
| wt-68430-68550 | 1995 | CTGTTGGTGGCCGCTGCTGACGTACGCGGGGACCTGCCGTTGGATCTTAGTGTATTATTAAACACGCTCCTGAAGAGGGCGGCCAGTACGGCTCTGAGCCAGAAGATAAAA         | 4 |
| wt-68550-68670 | 1996 | GTCCCGGGTGAACCACTGGGCACAGGACTCCAACAACGCCCCAGACATACGGTCACTGTCCTTACCTCCGCCACTCCTAGGACCCCTACTTGGAGAGTCCGGCAAGGCCAG         | 4 |
| wt-68670-68790 | 1997 | AGACACCTCGCCTGCCATTCCAGCCACTCCAGCAACCCGACTGGAGAGGGCTCTGGCTGTTCACTCGGAGGAAAAGGACATCGTGGAGGCCAGGCAAGCAGAAGCAGCCCA         | 4 |
| wt-68790-68910 | 1998 | AGAAAGTGAAGCAGGCCCTTAAACCCCTATTAAACCATGTTCTCGTGAAGCAGCACTGCTCCTGGGGCCCTGTTCTTCTGTCTCGGCCCTCCGCCAGCACCCTTCAATTTGG        | 4 |
| wt-68910-69030 | 1999 | TGCTTTGTCTTTGCCAACCTGCTCTCTCTGGAGATTTCTCACCCTGGCAGACACAGTGTACAGGCTTGGATTCGCCAGGCATGCCTAATGGCCGCTCTGGACGCTGGTACCAGCC     | 4 |
| wt-69030-69150 | 2000 | AAGCAGCGGTGAGGGCGCTCACTCCAGCCATCATGCTGAATATGCCAGCGCTTGATCTTCTCTCCTCAGAGTCTACTCGACCAGCAGTGGGTTCTGCCCCCTGTCTTTCTG         | 4 |
| wt-69150-69270 | 2001 | GCCAACTGCCTCTTATGCCTGTGGCCCGGCTGGCCATCGAATGTTTACATCTGCCCGCTATACACAAAGGTTCTTTGAACCTGGGTTGCTCTGGCCTGCACCATCTTTGCC         | 4 |
| wt-69270-69390 | 2002 | CTGTCCGTGGTCTCCAGGGCCCTGGAGGTTGCGGCTGCTTCATGCTCCGATTTTTCATCTTTCTGGCTTGGGCTTGGAAAGCCTGGCCGGTGTCTGGCGTAACCAGATTTACACCTG   | 4 |
| wt-69390-69510 | 2003 | GGTCTCGAGCGGAGCAGCATTTTCTGCGCCGGGGAGATCATTCCTGGCAGGCCCTCATAAATGGCCGTGGGATCTGCTGGCCATCTGCCCTTCTGAGCTTCTT                 | 4 |
| wt-69510-69630 | 2004 | GTCGTCTGTGATGATTTGTGTTGCATGTCACGCAGAGGTGTTCTTTGAGCTCTAGATACTGCCCTTTCTCTGTGGGGCGATGGCCTCCGGGGGCTGTACTGGGCCATTCC          | 4 |
| wt-69630-69750 | 2005 | AGCATCATTGCATGTGCATGGCCACCTCTGCACCCTGACATCTGTTGTGTATATTTCTCCATGAACCTTTGGACCCCTGGGCAAGCCGTGCTGTTATCTCAATCTTTGCTAT        | 4 |
| wt-69750-69870 | 2006 | TACTTTAGCGGGTAGCGCCCTGAGCGCAGTATGCGCTACAAGCTTAAAGAGTTTGTGAACGGACCCTGGTCCATCTCGGTTGTGATACATGTCTGTTTGTCTTACTTTTGT         | 4 |
| wt-69870-69990 | 2007 | GAATATCTGTTGGTGACATTCAAATCCTAACGACCCGAGTCTGCTCTTTGTGTTCTGGGGGACTGAGTTAGCTGCTTTCTTATACATTGGGCTAACGGGAGGAAATGA            | 4 |
| wt-69990-70110 | 2008 | ACCCAGGGTGGCAGTGGATGGGTCATTTATGGGCAAACTCACAGGACATGTTTGGGGATTAGCATTTGGCCTGGGAAACACAGCTTGGCAGTTAATACCCGACCAGCTAACAGGA     | 4 |
| wt-70110-70230 | 2009 | CATGTTTGGGGAGTTGGCATTGGCGTACGAGACACGGCTCTGTACAGTTACACCCTAGATGCCATGTGTGCCAGTGCCCTAATCACCGTCCCTATTTTGTGTGCCCTCAA          | 4 |
| wt-70230-70350 | 2010 | ATGTTCCAGAAGTCGGCCACAGGGAGGTGGCTGAATTAGGGCTTTTCCCTATTCCCCTAGAGACCCAGTGGCAGGCCCTAGGGCTACATTCCCTCCCAGTTTCCCTTCGCGTG       | 4 |
| wt-70350-70470 | 2011 | AGGCATCCGATATGACTGAATTTTCGAGTCTCTTTCCCTCTCCCTTGTTATTCATAGAAATTACAGTGAAGTTACACAGGTGGAGATTCAGTTTAACCATTATTGATTAAATCCA     | 4 |
| wt-70470-70590 | 2012 | GGAACAAAAACAGTCTAGTGACCCAGTGCCCGGAGAGAGAATGGCCCTGACAAGTCCGGTGCATGATGACTTCGGCAGTCACGTGTGAGTCTCCAGGCCCTGTCAAAGGGAG        | 4 |
| wt-70590-70710 | 2013 | CTTAGCGTGCACGGTGTAAATCTTGTGTGAGTGGCCAGGAATTCAACTTCATCGTCTCCTGTCCAGTTGCCGTTAATGTAGGCTGGGCTACTGCCCATATGCTGCAAGAGA         | 4 |
| wt-70710-70830 | 2014 | CAGAGGGGCTGCTTACATATGAGCTGCTCAGGCTCCACCACCTTGTTTGACGGCCGTGGCACAGGTGTGTAAGAAGTTGCTTCAAAAGTTGAGTCTCGCTGTTAGGAAG           | 4 |
| wt-70830-70950 | 2015 | AAGCAGGGTGCACGCTTTTGAGCTTGGTCAGGATCACCTTGCTAAGACTCATGGCCAGGCCAGGAGGATGCTTCCCGGGAGGCTAGGGCCAGTGCCCGTGGTAGGTATCTCCTGG     | 4 |
| wt-70950-71070 | 2016 | AGCCAAAAGATGGTCTCTTCTAGCATGGCCACCAGGGTGCAGAGCCCCGCTTGTGGATCGCTGCATGCCGTGCATCCAGCCATGTGTCTTGTGGTTGACTTGGTAAAAACTCAGCT    | 4 |
| wt-71070-71190 | 2017 | AGTGTCTTTGAGTCTTCCGAGCTCGTGTCTGGGTTGCACTTTCTGCCAGGCTCCAATCTCGGATGGCGGGCACCACCAGCATCGACTGAGGAACGGGTCTTGGATGGGCTCAGG      | 4 |
| wt-71190-71310 | 2018 | GTCAGAGAGGCGAGGGGCTGGCAAGGTGACAAATGTAATCTTGGAGACAGGCTTAAACAGACTCATGTCAAACCAGGTTTGTTCGGCAGGGGCCTTGGCTGCTTCTTCCCTCGCC     | 4 |
| wt-71430-71550 | 2020 | CTGGGCGCTTGTGCTCCCGGGGGCAGGTGTCGGCCTTCCATAAATTTTCATCGGTGCAGCCATGACCTCTCCGGTCCGCTTTTGTGGCCTCGGTGTAAGAGGAGTTGCCAGTCTCC    | 4 |
| wt-71550-71670 | 2021 | TCCTTCTCGTCTCTCCTGCACAGGGGTGAGCGATGCAATGTACTGCTTGTCTGTAGTCCCACCTTCTTCTGGAAATCACAAACGATGCCAGGTAGGGGTTATGACCAGCTG         | 4 |
| wt-71670-71790 | 2022 | GAGGGCGTGCAGGTATGGCGTGGCCGAGTTGGATCTTCATCTCCTCTCTGAGGATGAAATCTTCCATCTGTGGAGTGTCTTCTGCTGCCCTCCATAGGTCAGATCGCAGTCT        | 4 |
| wt-71790-71910 | 2023 | GTGTTGGTGTCTGAGACCGCTTCGAGTTCCAGAATGTGGCTCTGCAAGGGGAGACAAAAGTTGGAGACTGCCTTGAGCACCCTGCTCTAGGCACCAGGATGCCCCGGCTCCAGGGC    | 4 |
| wt-71910-72030 | 2024 | CCCGGCACTGGCCGGTGTAGCTTCTTACCTCGGGATCCTCGTTGGAGGAAATGCTGTAGTTCCGGAGAGTCTCTGAGAAGAAACCATCTTGTCTGTCTACGACGGGCTAGTGGG      | 4 |
| wt-72030-72150 | 2025 | ATGTAGTGTCTTGTACTGGCCTCAGCCCTATTATGATTCTGGAGCCGGCACGCTGATGGAGAAATGGCGGTGCGTTGATTGGCCCAAGCAGCCAGCCGGAAGCACTGACTCATGA     | 4 |
| wt-72150-72270 | 2026 | AGGTGACCTGATGGCCTGTGATGTGATGAGTAGACCCAGAAACCCCTCACTTCTGGAGCTGGCCCTGTTGGTATGCCTCAGGCACGCAAAAGTTCTGCCCCGGGATGGCACACCT     | 4 |
| wt-72270-72390 | 2027 | GAACCAAGTTTGGCCCGTTCCTCAAACGTCACATGGAGAACTGGGGAAATTTGCTTCTGGCACAGCTGTTGCCAGGTGCTCATGAGCCAGGGCCAGATGCAGGAGCTGACCAGG      | 4 |
| wt-72390-72510 | 2028 | CGACGAGATCCAGGCCAGATGTCCCTTATCATGGCCGAGACATTTCCACGGTGGGGGGCAGGGTCTCGCGGGCTCTGGATTAGATGTCAGCCCATCATCCGCATGTGGTAGC        | 4 |
| wt-72510-72630 | 2029 | AGAAGGTTTTGGGGCGGCCACGCCACCTGAGGTCAGCTGAGTGTGAAGAGGTTTGAATGTTGAGGGCATTCTAATAGTGTGCTTGTCTTCCCTTCCGGATGACAGACAAGAGGC      | 4 |
| wt-72630-72750 | 2030 | GCAGTGCCGGCTAAGACACCCGCTGCACTTGTAGGTAGCGGACCCGCTGACACCCGCTGTCAAAAGCAGCCAGCCGCAAGCACTCTTTGATCTTGT                        | 4 |
| wt-72750-72870 | 2031 | GACGATGCGGGCAGCCAGGCGGCTTAGGCCATTGAGCTTCTGCAGCACAGACAAAACCTTGTACTCGCTTGTCTCCACAATAGCATGGCTTAGGTAGGGGGGATGACCGCGAA       | 4 |
| wt-72870-72990 | 2032 | AGCCAGTTTCCCGTGCATATGCAAAAGGGGAGCACATCTTCCATATATCCGGTGGCGGGTGGACAAGCTGATTTGAAAAATAGACTGGTGGCCCTGGCACTGGACCCAGGC         | 4 |
| wt-72990-73110 | 2033 | GGCGCATGAGGCCGAGTACCTCAGCCGACGGTCCGGCACAGGTCCATAGATTTCTCCAGCCAGGAGGGCCCTTGTATCTTATAGTCCAGGTCCAAGACCAGGTTGCAGACCCGAA     | 4 |





|                |      |                                                                                                                          |    |
|----------------|------|--------------------------------------------------------------------------------------------------------------------------|----|
| wt-85830-85950 | 2140 | AATGTCGGCCAGGGGCAACAGCAGACTCTGGAGTGGGAGGAACTGCTAACAGGAAAGGGACATGTTGGGGCTGGGGGACATTGCAGTTTCTCCCTTCTCTTGAACATCGAAC         | 4  |
| wt-85950-86070 | 2141 | GATGAGTGATTTCCGCCATGTAACAAGAACTGGGATGAACCCTGGGGCAACAGACTGCGGGGAGGAGGGGGCAGTGATAAGTCATGACAATTTAGATGAGGTAGAAAATTTTGCATATT  | 4  |
| wt-86070-86190 | 2142 | TTCAGACCACCATGGAATCATTGAAGGACAGGGGACTCTAGACAGTCAACCAGCAATGAGCGGGGAGATAATGTACAGACTACCGCGGAGCATGATCAGGACCTGGCCGGGGCCT      | 4  |
| wt-86190-86310 | 2143 | CCATCCAGTGGGGCTTCTGAGAGATTGTTACCAGAGAGTCACTAACAAGAGATCAGCAACTTTGGGGGCAAGCAGGGGTGATGAAAACAGAGGCTGATGAGCGCATCAGCGCAAGG     | 4  |
| wt-86310-86430 | 2144 | CGGAGAAGACGGGCTGCCTTGTCCGGCCATCTTTAGACACGGAAAGCAATGTGCCGCCATGTTGCCTCCACACGACATACACCATATACCGCAAGGAATATCAGGGATGCTGCCTGC    | 4  |
| wt-86430-86550 | 2145 | CGGGCTGTCAAGGTGAGTATGCTCTAAGTGGTTCATGGGGCCATTAAGGCCACGTGTGACCCATGTTCCATTAATTTAGCAATGCACCTGCAAGCGCTATCAACCTGATAC          | 4  |
| wt-86550-86670 | 2146 | TCGATAGTGGGTTAGACACACAACACTCTTGTGCTTCTGTGATGGAGCCGCTCTCAGGACATTTGCAGCTGGACCCTTGGTTGCGGAGGGCGGTGGGTTGGCGACATTTGGC         | 4  |
| wt-86670-86790 | 2147 | TTCTAACATCTCCAGCCAATCCTGGCCCATGGGATATCGTACAGCAACACTACGCACATTAACCTCCGTGCCTAACAGGGTTGGGGCTGACAGCATCATGTTAACTGCCACATTTGGAT  | 4  |
| wt-86790-86910 | 2148 | GCCAAAATGCGGCACGAACTCTAAACACCTTCTCTGCCACCCTGTGGACACACCCCATGCTGGACCAAGAGAGCAAGAAAGATACGCTCGGGAGCCGAGGTACGCTTCTCTGTGGTA    | 4  |
| wt-86910-87030 | 2149 | AATGCGAGAGGGGTACCGAAGAATCTATGATTTGATAGAACTGTGTGGCTCTCTGCACCACATCTGGCAAACTTGTCCAGACCGAGGAGAACCTTTTAGATTTCTGTGCTTTTCATGG   | 4  |
| wt-87030-87150 | 2150 | GTGTCATGTCCAGCTGCAATAATCCAGCTGTAATTAAGTCTGTTTACAAGACAATCGGAACTTTAAGCCATATTCCCGTGGAAATGCACACCTAATGAAAATCCATATCACGCGCGGA   | 4  |
| wt-87150-87270 | 2151 | GAGGCATAAAAGAACACGTAATCCAGAACGCAATTCGAAAGGCACAATAACAGGGTTTATCAATGTTAGCAACGGAGGTGAACCCAGAGGTGATGCTACTAGTGAACAGGACGATGATG  | 4  |
| wt-87270-87390 | 2152 | AGGACACCCGTAGACAGGGTTCGGACGTGGAGCTAGAGTCTCGACGATGAGCTGCCATATATCGATCCCAATATGGAGCCGGTTCAGCAGAGGCCCGTCATGTTGTGAGCCGTGTGC    | 4  |
| wt-87390-87510 | 2153 | CTGCAAGAAACCGAGGAACTGCCTTGGCCACGCCCAGACGCACCCAGTGAAGCGCACAAATGTTAAGACCTCTGATAGATCTGATAAGGCAGAAGCACAAAGCACCCCTGAAAGGC     | 4  |
| wt-87510-87630 | 2154 | CGGGCCCTTCGAAACAATCATTAGTGACCGTGGAGCCCGCCACCCGACCCCGGTGGAGATGCCAATGTTGATTTCTCCATCAACACCTCCAGTGCCTAAACCGGTTCCAGTCAAGCCTA  | 4  |
| wt-87630-87750 | 2155 | CGCCACCCCTTCCCGTAGGAGAAGGGGAGCGTGTGTTGTGTACGACGATGATGTCATAGAGGTGATTGATGTTGAAACCACCGAAGATTTCATCGTCAAGTGTACAGCCAAATAAGCCAC | 4  |
| wt-87750-87870 | 2156 | ATCGGAAACATCAAGACGGCTTTCACAGTTCAGGCCGACGTCAAAACGAGCCGCGCCTCCACCCTGAGTCTTCGGATACTGGCCCTCTCCGCTGGGGCCCTCTGCCGCGGGCCTC      | 4  |
| wt-87870-87990 | 2157 | CTGCCGCGGGCCTCTGCCGCGGGCCTCTGCCGCGGGCCTCTGCCGCGGGCCTCTGCCGCGGGCCTCTGCCGCGGGCCTCTGCCGCGGGCCTCTGCCGCGGGCCTCTGCCGCGGGCCTC   | 12 |
| wt-87990-88110 | 2158 | ACATAGTGACGCTCTTCCGCCCGCCTCGTATAATGGCGCTCCCGTCTGATGATGTTTATGAGGGAGCGACAGCTCCCCAGTCCACCGGCCGTAACCTCAGTGCTTCTGGGAAA        | 4  |
| wt-88110-88230 | 2159 | TGCGGGCTGGTGTGAAATACACAATGCAACAAGAACCAAGTTCACACCTGCAGTCCGCCACTCAGCCTACACCGCCTCGCCCATCATGGGCCCATCAGTCTGCCCTCTCTGGTGA      | 4  |
| wt-88230-88350 | 2160 | TGGATGCTGGTAAGGCCAGCCATAGAAAGTTCACACTTGAGTTCATGTGCGCCACACAGCCGATATCGCACGAAGAACACCCCGGTATGAGGATCCTGACGCTCCTCTGGATTTAA     | 4  |
| wt-88350-88470 | 2161 | GTTTACATCCAGCGTTGCTGCTCAACAGCTCCCCAGGCTTACACAGGGATACAGGAGCCGCGCCAGCTCCATACCAGGGTACCAGGAGCCGCGCCCGCCAGGCTC                | 8  |
| wt-88470-88590 | 2162 | CATACCAGGGATACCAGGAGCCGCGCCACGGGCTCCAAATCATCTTATATCCAGGATATGCGGGTCCCTGGACCCCAAGGTCTCAACATCCATGTTATAGGACCCCTGGGCACCAT     | 4  |
| wt-88590-88710 | 2163 | GGTCTCAAGATCCTGTGCATGGGCACCCAGGTCATGGATCCAGGGCACCATCTCCACCTCAGTGGATGGATCTGCAGGACATGGCCAGGATCAGGCTCTCCAGTCTCCAC           | 4  |
| wt-88710-88830 | 2164 | ATCTGCAATCGGAGACAGGCCACCACGCTTCAACTTTCAATTTGTTGCCACTGGTCTATCCTCTGCACCATCATGGTATCTCCACAGCCCGAGCCCCATACGCCCATCCCAACAA      | 4  |
| wt-88830-88950 | 2165 | GATCCCCCTCCCCTATGCCGTTACAAGATAGCATGGCCGTGGGGTGTGACTCATCAGGTACAGCATGCCAAGCATGCCCTTGGCCAGTATTACAGTCAAGGTGCATTTACCCAC       | 4  |
| wt-88950-89070 | 2166 | TGGACATTAATGCCACCAGCCAAAAGGCGCTCGAGTAGAAGAAAGTTCACAGGACCTGCCGGTGTCCCAAGCTACTGCTGAAGCAGGAGATTCTCAGTGACAATTTGAGATCT        | 4  |
| wt-89070-89190 | 2167 | CCGTGTTCCCAAAGGACGCGAAGCAGACTGACTACGATGCATCCACTGAAAGTGAGCTAGATTAAAGGGATCCAAAGGTGACCCCTGTAGCTATTGACTGACACATAAACAT         | 4  |
| wt-89190-89310 | 2168 | GGTTAAAGGAATGAACACTCATGGTGTGAGACTGGAAGTGTACTAAATTTGCTGACATATGCAATGAGAGCCAAAATTTGATAAACCTTAAAAGTCCCCCATCTAATGATGTCCAG     | 4  |
| wt-89310-89430 | 2169 | TTCCCTTCTCCACCTGTACACCCGACCCAAAGGACTCAATGGCATTGAGATTTCTAGTTACCACAGGTAGAATATCGGGCGTGGCCATAAAAATAAGTGCATGGATATAGCTCT       | 4  |
| wt-89430-89550 | 2170 | GCACAGGCTTGGAAACACCCATTCCAGGTGTGCTCTTTTGGTGAATAAAAACAGCATCCTTTATATGAAAATGTGATTTCTCTGGTGTTCAGTATGTACAGTTAGCTTTGGTATAG     | 4  |
| wt-89550-89670 | 2171 | TTTTGGGTACTGAAATGTGTGAGGGTGGGTGTCATGTGGCAGTTTACCTCTTTGTCGCCATACTCTGCTCGGCCGCTTTGTTAAAGTTAACCGCGGTGGAGGATCCACCGGC         | 4  |
| wt-89670-89790 | 2172 | CAGACCTCTACATTTGGTTGGGTACCCAGGTGATGGCCGCGGCTGCCACCCGCTCCTCTCTTACCCTGGGTGGCAAAAAGTATGCCAGGAGTAGAACATAACCAAGTCCGATGGCG     | 4  |
| wt-89790-89910 | 2173 | GTAACAATGGCACCTCACCTGCTTAAATGAAACCATGGCAACCCTTCAAAGAGAGCCGACAGGAAGATATTTATTAATATTCATTAGTAAACAGGGCGTGAAGCAGGCGTGGTTTC     | 4  |
| wt-89910-90030 | 2174 | AATAACGGGAGTTAGAAATTTAAGAGATCCTCGTGTAAAACATCTGGTGTCCGGGGGATAATGGAGTCAACATCCAGGCTTGGGCACATCTGCTTCAACAGGAGGGCGAGCCTGTCAATT | 4  |
| wt-90030-90150 | 2175 | TCAGATGATTTGGCAGCAGCCACCTGCGGACAAAATCAGGCGTTTAGATGGGGCATTATGTTGGGACGCTAGCCGCTGGGCATTCGTGTTAGTATATACTGACCTCACGGTAGTGC     | 4  |
| wt-90150-90270 | 2176 | TGCAGCAGTTCCTAACTTGGCCCGGCATTTCTGGAAGCCACCCGATTCGTATCGCTTATTCTAGTTTCAAGTGCATTCCTCCAGCTGCGAGCAAGGGAATGCGTTACTACAA         | 4  |
| wt-90270-90390 | 2177 | GTGGTGCCTAGTCAGTTGAAACAAGCCCAACCATCCGCTGCCGCCCTCCATGAGCCCAACCGTCCGCTGCCGCCCTCCTTGGAGCCCTCCTTACCAGTCTGGCTGTTGGTITCCG      | 4  |
| wt-90390-90510 | 2178 | TGTGCGTCTGCCGGGACGCACTGGTGCAGGCTGTGGAACCAATGTCTGCTAGCTGTTGCTCCTTGGTTAGCCCGGGGCAAGCAACACCACTGCTGCTGCTGTTGAACAGTAGA        | 4  |
| wt-90510-90630 | 2179 | ATTGTCTCCAGGTTGAGGTGCTTCTCCCGGCTTGGTTAGTCTGTTGATTCTGGGTTATGTGGGAGACTGGGAACAGCTGAGGTGCTGCATAAGCTTGATAAGCATTCTCAGGAGCAGG   | 4  |
| wt-90630-90750 | 2180 | CTGAGGGGAGAAAACACGACCCAGTCCGAGCGGTTGAAACATGATAGGCAATTAGCTGGCCCTTGGCAGAGGCTCTGGCAGCACCAGGACACAAAGGCAAGGAGCTTGGCA          | 4  |
| wt-90750-90870 | 2181 | TGGCCCTCCAGGTCCTGATAGACTCTGGTAGCTTGGTCAAAAGCTGTGACAAAAGGCACTGGATGGGTGAGGTGAAATTTATCATCTTCAGAAAGTTCAGGTTGGGTCATCATCTT     | 4  |
| wt-90870-90990 | 2182 | CAGCAAAAGATAGCAAAAGTGGCCGCGCAAGGTGCAATGTTTGTGAGTTACCTGTCTAACATCTCCCTTTAAAGCAAGGACCCAGCCTCCTCTGTGATGTCATGGTTGGGACGTGCTA   | 4  |
| wt-90990-91110 | 2183 | AATTTAGGTGTCTATGAGGTACATTAGCAATGCCTGTGGCTCATGCATAGTTTCTAAAAGAGGAGGAGGAGTCTTTTCAAGAGTGTCTAAAATAAGCTGGTGTCAAAAATAGACAGCCC  | 4  |
| wt-91110-91230 | 2184 | AGTTGAAATATGCATGGCATGCAGCAGACATTCATCATTTAGAAATGTATCCAAGATTTCAATTAAGTTCGGGGGTGAGGGGGAGTCCAGATTCAAATCCTCTGTCTGACTTAGTGT    | 4  |
| wt-91230-91350 | 2185 | TGTGCTCAGTTCGTTCAAAATGGCCACGAGGGGGCGGGTGCCTCAGTCCATCTGTCCACATATGGCTGCTCCTCCTTCTGGGGAATAACAGTGTACAGCATCTCCTTAGGGCCTCAC    | 4  |
| wt-91350-91470 | 2186 | GGCCTGACTGTTTCTTATCAGGGTCCCAACAGCATGACTTGCCTCGGGGGTACTGCGGGGGCGGGTCAAGTGGCTGGGGCACCCGGGCTGGCTTAGGGATCCGACCCGTTTCATG      | 4  |
| wt-91470-91590 | 2187 | GACAGGCTCTGTGGGGTGGGAGCCAAAGAGCAGGACGGGCGGTTGGCCACGGGGTCCGGGTGGATGAAAGGGCTGATCCTCTTTGGCTGACACACCTCGCCCTCGCCGCTGAACAC     | 8  |
| wt-91590-91710 | 2188 | GTCAGATATGCACACTGCCGCTTCCGCTTTGGCAGGAACATACCTTCCGGCTATCCTGAGGCCCTTCTCTTTTAAACGGGAGGAAGAAAGGTGGGCTTTAGGGGTGGGGAATAT       | 4  |
| wt-91710-91830 | 2189 | GGGTCTCTCATCGTCTCTTGGTGGACCGCTGCTATCCAAGGCTGTTCAAGTTCGCGCGGTTGGAAGGACATGGAGTTTACCACGGTGGCCCTGGATGTCCGCGCGACTTTGGGGC      | 4  |
| wt-91830-91950 | 2190 | CCGACGGCGGGGCTCGGCCCTGCGCTCTTCCGCTCGCTCTGCTGGTGTCACTGTTGCCGAGTCACTGCTGCTGGAACCTGCTGTACCCGAGTCCGCGCTTTGGGCACCCGGCTT       | 4  |

|                |      |                                                                                                                           |   |
|----------------|------|---------------------------------------------------------------------------------------------------------------------------|---|
| wt-91950-92070 | 2191 | CAGGGGCATGGTCGGGCTCGGGAGACTTTCGAGTTTCACTGTAAAAGCATGAAACTGTCCGGACTCCGAGTAGCGGGCCTCGGTGTGAGAGGCCACCCCATCATTCCCATGAGCTCCTC   | 4 |
| wt-92070-92190 | 2192 | GTCCATCCTGTCGGCTCCGGACACGAGGATAGGAGTTCCTCACTGCCTTGACTTGGTTGACAGCAGGCCAGCGGGGAAAGCACGCCGCTCACGTAGCTCCTGTGTCGGGCTGGCTGGAGTA | 4 |
| wt-92190-92310 | 2193 | GGAGGCCCGGGCAGTGTCTTAATCAGAGCCCTGACATCCTTAACATCGTCCGTGACATGCGCTGTCTTGGACGAGACCATAGCTGGAACATCTCTCGAGGACGGGATAGTGAACAC      | 4 |
| wt-92310-92430 | 2194 | CCACTTGCAAAGGCCCTTGAACCTGGAGCTTAGGAGGCTTCCTTCTCCATCCTGTTACAGGTGTCCACTACCTGCTTGCCTGGAGGCCATGATGGCCGCGCGGTCCACGCCAGCACCTT   | 4 |
| wt-92430-92550 | 2195 | GCTGTAGGTGTAGGCCCGCACCAGACTGTGTTTTAGGAGCTTGTACATAGCGGTGCCTATGGTGGCAGGAAATCATCACCCGGTGTCTGGGGCCCTGGATGAAGAACTGTCTAGTACCCAC | 4 |
| wt-92550-92670 | 2196 | TATCAGGTGGTCAACAGTAGCCATCATCTATGGCCACCGGATGGAACATCGTGTGGCGCCTTCCAGCCCTGTCTTACCCTGTGGTTTTGGAGAATGGCCAAAATAGGCA             | 4 |
| wt-92670-92790 | 2197 | GATGTTGAGCGTGGCCATTAGCCGCCCCTATTGCTGCCCCCTGGCCCTGCGCTTATAAAATGCCTTTTGTAGGATCTCAGAGTAATCTCCACAGCTCCCGGCTGTAAATTC           | 4 |
| wt-92790-92910 | 2198 | CTTGTTGAGGACGTTGCAGTAGTCAGAGACCAGAGAGCCAGCTGCTTTTTGATTTTTCAGGAGTTAGCCTCAGAAAGTCTTCAAGCCATCCTTTTTAGGCCCTCATGGCTAGTAGTAACAG | 4 |
| wt-92910-93030 | 2199 | AGGAAATGCCGACCATTAAAATCTTTCCCTCATGAGCTTTACCTGAAACATATCCCGAAGTGGGGATGTGGTGCATCTACTGAAACCATCGGGGTCGACTGCGACCCTCCACCTAG      | 4 |
| wt-93030-93150 | 2200 | CCACCCTCCTGACAGCCCAGAGGGGGCTTCTTCTGGCAAGAGTGTGACAGGCTGTACAGCAGCACAAGCTGCTGGAAAGACACCATCGTCCCAAGATCTTAAAGAAAGTGGCTTATTT    | 4 |
| wt-93150-93270 | 2201 | CTTAGAGCTGCTAAGCTACTACTCCCAAGGATGAACAGCGTAGCATGCCGAGGTTCTTGACCACTCAAGCAATCGGGACCTGGGGCTGGACGACAGACTCTGGCCCTGATTAG         | 4 |
| wt-93270-93390 | 2202 | GAACTGCGCCAAGACAGACACCATGCTCTGTAAATGCTCCATGCCGGAAGCGACTACACAGCCCTGTGCTCTGACAGTACTACGACGGCATCTCCACAGGTATGAGGAAGGTAATCGC    | 4 |
| wt-93390-93510 | 2203 | GGATGCTGCCGAGTGGCTATGCCCTCCATGCCCTCCATGACGGCCACGCACAACCTCTCCACCAGCTTGTGATGGCTCCCGGGCCAGTGAAGAAACCGTCCCGCTGGCAGCGGTTCTT    | 8 |
| wt-93510-93630 | 2204 | TAACCAGTCTCCTCTGGACTGTGGCCCTCTGCAAGTTTTCGACAGTGACTTACTATAACTACATTAGGGATCTATAGCCACCATCTCCAGCTTCTGCACCTCGAGATCAAGGCCCT      | 4 |
| wt-93630-93750 | 2205 | CTGACAGCTGGATAATATCCAGGATGGCATGCGCCCTTTCACAACAGCAGGCCCTCTCTCACCCTTGGAGAGCGTGGCCGAAATCAGGAGGTACGGATGCCATTACCTGCGCTGA       | 4 |
| wt-93750-93870 | 2206 | CTGCGCTGAATACATAGACTACTAAAGCAGCAAAAACATGTCTTAGAAACTGTTCTGCCATGCAATAAATAAATTTCTCTTACCTGCGTGTGTGGTAGTGAGGTGGTGTGTGC         | 4 |
| wt-93870-93990 | 2207 | TGTATGGTACTTACTTTTTAAAAGGCCGGCTGACATGGATTACTGGTCTTTTATGAGCCATTGGCATTGGCCGGAACAATCGAATAAAAACCTGACCATCACATGGGGCATTAGGCCGA   | 4 |
| wt-93990-94110 | 2208 | CTCTGATCAGCATCGCTTAAATGATGAGTGGGACAGCAGAGGGCTCGTATTTTTGGTTCCTGAACATCTGGTGGGCACTTAACTAAGCTTATGAGCGATTTTATCACAGGACAAGATG    | 4 |
| wt-94110-94230 | 2209 | TCACTTTTCTGGAGGAAATATGACAGTCAAATTCGGATGCTATAAACACAGACCCCGGGGGTGGTGATGTAGTATACTTTCTTCCCTGTTGTCTTATGGAATGCCCTCCCAACAT       | 4 |
| wt-94230-94350 | 2210 | CTGGTAGACAATCCTCCAGGGACGATTAATCCAGCGCCGCTGCAGGGCTTAACCAAGCCGCAACTTATGTCGGGTGTATTCCAGGTGAGACCTCACACAAGGACACACCCAGT         | 4 |
| wt-94350-94470 | 2211 | CATTGCTCCGGCTATCGTGACGGGTCTCCAAAATGTGGTGGATTCGTCGGGATGCCAGAGTGCCTACAATGTCTTAAAGGATTGAAGGCAATTAAAGCCGGCTTTATGAAATCC        | 4 |
| wt-94470-94590 | 2212 | CTAGATAATACCACACTAAGCAGTGTAGTCCCTGTAATCTGTAACATGTGTCCCAAGCTTGGTCCAGCATTGACGCTTGCATGTCCAGCTTGACATGACAGCAGGGCCTGACGCG       | 4 |
| wt-94590-94710 | 2213 | CTGACTTTACGAAATCCCTGACCTCGATGACTCCGATGTGTTTTGCACGCACCTTATTGGACGCTTATTTACCTCAATATGTTCTTTATTTACAAAGATTACATAACACAAGACT       | 4 |
| wt-94710-94830 | 2214 | CCATGAGCTTGAAGCAGGCCCTCAGTGGTCATTGGATGTCTGCCAGGGCAACCCCTGCTGCAGCAGCGGAAACCTCGAGACTACTTGAAGCTTTCCGAAATCGGATAATCACT         | 4 |
| wt-94830-94950 | 2215 | TTTATCTCCCGACGACAGGGCTTTAAACACCTTCCAATTTCCCGAAGAGCTTCTGGGGCGCGTGTGTTATGATTCTCTTTGTGTCGCGCAGTACAGTTCAGGACGTATCACCC         | 4 |
| wt-94950-95070 | 2216 | ATGGTGTGGGGCGGGTGTTCCTGCTCGTTTCGGCCCTGCCTCCGGCCCATCCCGCAGGCCAGCACGACATGCTCTCAGTTAACGACGAGAGGAAATGAAAGCTCAGGGCGAA          | 4 |
| wt-95070-95190 | 2217 | ACTTGGGCCAGCCCGGGGGACCTCCCTGCTTCCCCAGTTTGCCCATGCTTCCCTGACGGCTCAGGGGCCAAGCAAACCGGGGCGCATGGATCCCTGACTTAGCCAAGC              | 8 |
| wt-95190-95310 | 2218 | CTGAGAAACCTCCCCCGCCCTCCCCAGATGCCCATCGCTTCCCGAGCGGCTCAGGATCAGGGCCAAAGACATAGAGATGGTGTCCGGAGACCCAAAACGTCCTTGTGCTGCAAA        | 8 |
| wt-95310-95430 | 2219 | TTGCCAGTAGCATCTGTCTGTGTTGACCTTGAAGAGGAAAGAGGGGGTCCCGAGAATCCCATCCCTACCCTCAGCAAAAAGGGGACGAGGAATTTAGGGCTGGCTTAGGGCTC         | 4 |
| wt-95430-95550 | 2220 | AGGACGCAAACTTGGAGGATGTTACGCGGAGTTTCCCGGCTGCGAGTAATTGGTGATGAGGACGAGGATGGTTCGGAGGATGGGAAATTTTCCAGACCTGGATGCTGTGACAGCGACC    | 4 |
| wt-95550-95670 | 2221 | ATGAAGGGGATGAGGGTGGGGGGCTGTTGGAGGGGGCAGGAGTGTGACTCCCTGTATTACTGAGCGTGTCTAATAAAGATGTCTATTGATCTTTTATGTGAATCATGCTGTGAC        | 4 |
| wt-95670-95790 | 2222 | GAGGGCCAGGTACAGGACTGGAATGGCTAGGAGAGAAAGGGAGACACACTTGGACCAGAAGGCTCCGGCCAGTGGACCTCAAAGAAGAGGGGGTATAACCATGGACGAGGACGG        | 4 |
| wt-95790-95910 | 2223 | GGAAGAGGACGAGGACGAGGAGGGCGGAAGACCAGGAGCCCGGGCGCTCAGGATCAGGGCCAAAGACATAGAGATGGTGTCCGGAGACCCAAAACGTCCTTGTGCTGCAAA           | 4 |
| wt-95910-96030 | 2224 | GGGCCACGCTGGAACAGGACGAGGAGCAGGAGCGGGAGGGGACGAGGAGGGGAGGAGCAGGAGGAGGGGACGAGGAGGAGGGGACGAGGAGGGGACGAGGAGGGGACGAGGGG         | 8 |
| wt-96030-96150 | 2225 | GCAGGAGCAGGAGGAGGGGACGAGGAGGAGGGGACGAGGAGGGGACGAGGAGGGGACGAGGAGGAGGGGACGAGGAGGAGGGGACGAGGAGGAGGGGACGAGGAGGAGGGGCA         | 8 |
| wt-96150-96270 | 2226 | GGAGGGGACGAGGAGGGGACGAGGAGGAGGGGACGAGGAGGGGACGAGGAGGGGACGAGGAGGGGACGAGGAGGGGACGAGGAGGGGACGAGGAGGGGACGAGGAGGAGGGGACGGA     | 8 |
| wt-96270-96390 | 2227 | GCAGGAGGGGACGAGGAGGGGACGAGGAGGGGACGAGGAGGGGACGAGGAGGGGACGAGGAGGGGACGAGGAGGGGACGAGGAGGGGACGAGGAGGGGACGAGGAGGAGGGGACGGA     | 8 |
| wt-96390-96510 | 2228 | GCAGGAGGGGACGAGGAGGGGACGAGGAGGGGACGAGGAGGGGACGAGGAGGGGACGAGGAGGGGACGAGGAGGGGACGAGGAGGGGACGAGGAGGGGACGAGGAGGAGGGGACGGA     | 8 |
| wt-96510-96630 | 2228 | GCAGGAGGGGACGAGGAGGGGACGAGGAGGGGACGAGGAGGGGACGAGGAGGGGACGAGGAGGGGACGAGGAGGGGACGAGGAGGGGACGAGGAGGGGACGAGGAGGAGGGGACGGA     | 8 |
| wt-96630-96750 | 2229 | GCAGGAGGTGAGGAGCCGGGTGAGGAGGCGGAGTGGAGGCGGGGTGAGGAGGTAGTGGAGGCGGGGTGAGGAGGTAGTGGAGGCGGGGTGAGGAGGTGAAAAGGACCGAGGGG         | 8 |
| wt-96750-96870 | 2230 | GGAAGTGTGAAAGAGCCAGGGGAGAGGTGTTGAGGCTGGAGAAAGAGGGCCAGGAGTCCAGTAGTCAGTCATCATCGGGTCTCCACCGCGCAGGCCCTCCAGGTTAGAAGG           | 4 |
| wt-96870-96990 | 2231 | CCATTTTCCACCTGTAGGGGAAGCCGATTTTGAATACCACCAAGAGGTTGCCCATAGTGGTAGGCTGACGTTCCCGGGGAGGATAGAGGAGGGCCCGCAGATGACCCAGGA           | 4 |
| wt-96990-97110 | 2232 | GAAGCCCAAGCACTGGACCCCGGGTTCAGGGTGATGGAGGCGGCAAAAAGGAGGGTGGTTTGAAGGACATCGTGGTCAAGGAGGTTTCAACCCGAAATTTGAGAACATTGAGAA        | 4 |
| wt-97110-97230 | 2233 | GGTTTAAAGACTCTCCTGGCTAGGATCAGGTGAGAAAGGACTACCAGCAGGAACTTGGCTCCGGGTGTGTTGATATGAGGATAGTAAAGCTCCCTTTACAACCTAAGGCAGGA         | 4 |
| wt-97230-97350 | 2234 | ACTGCCCTTGTATTCCACAATGCTGCTTACACCATGAGTCTCCTCCTTTTGAATGGCCCTGACCACCGCCCAACCTGGCCCTCAGGGAGTCCATTGTCTGTTATTTTCATG           | 4 |
| wt-97350-97470 | 2235 | GTCTTTTACAACCTCATATATTTGCTGAGGTTTGAAGGATGCGATTAAGGACTTGTATGACAAAGGCCGCTCCTACTGCAATATCAGGGTACTGTGTGACGCTTTGACGATGGA        | 4 |
| wt-97470-97590 | 2236 | GTAGATTTGCCTCCTGTTTCCACTATGGTGGAAAGGGGCTGCGCGGAGGGTGTGACGGAGATGACGGAGATGAAAGGAGGTGATGGAGATGAGGGTGAAGGAGGGCAGGAGTATGT      | 4 |
| wt-97590-97710 | 2237 | AACCTGTTAGGAGACGCCCTCAATCGATTA AAAAGCCGTGATTTCCCCCGCAATAAAGAAATCCCAACAGTACAGATCATGCTGCTGTTGGTGTATTCTGGCCATCTGCTTGTGCTC    | 4 |
| wt-97710-97830 | 2238 | CATTTTGTCTCCCAACATGGGCAATTGGCAATACCATTGTTGCAGTCACTAGCTCCAGCTTCAACACTTCTCGCGTTGAAACATTAGGACATTTACCTGGTGAACAATCA            | 4 |
| wt-97830-97950 | 2239 | GACATCGAGCGCTTACGCTTTCGCTTAAATTTACCTAAAGATGGGAGCAACCACTGGTGCATCAGCCGCTGCGCAACCGACTCAACGTGGTCTCCTTTCTTCTCATCCTCTGAA        | 4 |
| wt-97950-98070 | 2240 | GCGAAGCAGCTCCGCCCTCACGGCCATCTCGTGAGTTGTTAACCCCTGGAGACTTTTACGGTTCATTCTCAGTGAAGACCTGTTGGTGGCACTTAAACAGATACCGCATGGCA         | 4 |
| wt-98070-98190 | 2241 | TGCGGGGGCTAGACCTCTGGCTGGATGAGCAGTGTGGAAGAGGAAAACAGGAGATTGGTGTAAAGGAGAAAATCTGCTTCTCCCGACTTATGGCTAGATTTCTACAACCTACGCC       | 4 |



|                  |      |                                                                                                                        |   |
|------------------|------|------------------------------------------------------------------------------------------------------------------------|---|
| wt-104310-104430 | 2293 | CTGGCCAGGTCACCCAAGGATTACTGCGCGGATCTAAACAAGGAGGAAGATGCCAACTCGGGCTTACATTTAACTCTTTTATCAAGATTCTTTATTGACCAAGCATTTCAGTGCCAG  | 4 |
| wt-104430-104550 | 2294 | ACCGTCCTCCAGACCTTGAGACGCAAGTGCCTCGGGAGTGACACGGTCTCAAAAATAATCCCTAGAATAAACTGAGAACAGTCATCAGTAAATCTGTCTCTCGCGTATTCCATAGGA  | 4 |
| wt-104550-104670 | 2295 | ATGGTGTAGCCGGGTGGAGGGCCGATATCACATCAAGCAGAAAGGCCATAATCTCTCGAAAGTAGGCGGTGGGGCTGAGACCATGCTCAGTGGCCGTCTGGCAGGGGGCCGGGCGCT  | 4 |
| wt-104670-104790 | 2296 | CCGTCTTGTCCAGGAGACACACTGGCTTCCAGAGAGCGCAGCCAGCCCTCCGAGCCGCTGAAGCCAGGCTCGCGGAAGAGCCAAAACCTGTTTCGCGCCGCCCGGGGGCCAGT      | 8 |
| wt-105030-105150 | 2299 | TCTCCACCCATCACATCCCGGTGAGGCGGCTGGCATTCCCGAGTCTTTACGCGCTTCAGGAAAGCCTAGGAGATACAGCAACAGAAAGCTATTAGCCGGTGGTTCACCCACCATCAT  | 4 |
| wt-105150-105270 | 2300 | TCTTCTGTAAACGGGAAGAATAAGAGTTGGGCAACCCCGGGCCGCGCTCCACCCAGCCCGCTTCTCACCTGTGTAGTGGCTCTCTGAAGGATGGCGGAGGTTGGTGCCA          | 4 |
| wt-105390-105510 | 2302 | TGCCATAGCGGTGAAGGGCCCGAGCCGCTTTGCGCGTCCCGCGCTGCCCTCCGCTCAGGCGTTCACCGGGGGCCCTGGCAGAGAGGTCGACGAGCCAGCCAGTCTGTAGAGCC      | 8 |
| wt-105510-105630 | 2303 | ACCAAGTGGCATCAGCCTCAAGGATGGCTGTGGCTCCGCGCGCCGACCACCGTCTGCTCTGCTCTCCCGCTCCCTCGCGCCTTCCCGGTGCAAACTGGCGAGGGTTAATCTCT      | 8 |
| wt-105630-105750 | 2304 | TTCGGGTGCGGGGCCAGATTTGTTGTAGGAGAGCGAGCCGCTGTTGCCCTGACCGCGGTGAGGCCAGGAGGGGCTGTCAGGGGGCTCCAGAGACTCCAGGTTAGGTTCCA         | 8 |
| wt-105750-105870 | 2305 | GTAGCAGGAGACCCCTCGTGTGTGGCGCCCGTGCAGAAAGCCCGCTCGCCCTCCACATAATGGATGGCAGGAAGGAAAGCCCGGACATAGGGCTGAAATCTGAGCCCCCTG        | 8 |
| wt-105870-105990 | 2306 | GGCAGAGTTCGGGTCCAGGAGTAGAAGATGGCTTGGTCTGTGGTGGCTAGCAGGAGGCATAGATCTCGGAGGAAGCGTAGCCGCCCGCCCGCCGACATCAAGAGT              | 4 |
| wt-105990-106110 | 2307 | TGACAAGCCAGGACTGAATCCCCAGCCGCTCAAGAATTTTCAAGTTCAGGCTGACCGCGTCCCTCGGGCTCCACACCAGCCGCGTGGCCCGTGGCAGACACCCAGATCTACTATAAG  | 4 |
| wt-106110-106230 | 2308 | TGACCGGTGCGAGGATGTCCTAAAGGGGACGGGAGAGGGTCTCGGGAGTCTCGGTGGAATAGTGAAAACATCCCCACCGGTGTCCTGATGATACGTCCAACGTCCGGGAGACT      | 4 |
| wt-106230-106350 | 2309 | CAGAGTGCCTCTGAGCATGGGGCATGTCTGTCCCGCTCCATCTCGACCAGGACCATCAACAGTGGGGTGTGGTCCCGCCATCATCCCGGAGCAGCTTTGGCAGACCCT           | 4 |
| wt-106350-106470 | 2310 | GTGCTGAAAGAGAGGCTGGAAGATGAGCCCTGCTCATCTCCACCTGGCGGCGACAAGAGTCTGCGGTCTCGGGTCTAAATGAAAGGTCAAATAGTCTTCTCGCGGCATCGG        | 4 |
| wt-106470-106590 | 2311 | CGAGCATAGCAATGAGCCCCCGCTGCGCTGAGCTCCCGCTCCATCGAAAAGTTGAGTTCCGTAGTCGAGGGCGGTTGACCACGGGGGCTCCAGGGAGCCTCAAGCGCGGCT        | 8 |
| wt-106590-106710 | 2312 | GGCAGGCTGCACCCAGTACAGATCTCAACGTCTCCCTTTTGTAGGGCAGCATGCCACAGCCAAATGCCACCCAGCCCTGCGGTCTGGGTAACATTAATAAGGTAACCCGAGC       | 4 |
| wt-106710-106830 | 2313 | TGACGCGGGCCCTGACGCTCTCCGCGGGTGTTCATCATTTTGTGATCTGAGGAGGACTGGACCTTTAAAACATCCGGTACGCGCTTTCGAAATTAATAAGGTAAGTGTCTCA       | 4 |
| wt-106830-106950 | 2314 | ACTGAGACCATCGCAATCATGAAGTCTCAAGAATGACACGTTCTATAGAACGTTGGTCAAACGCTTGTGTACTTTGTGATGTTGTCATGTGCGGGTGGTCCCATCACC           | 4 |
| wt-106950-107070 | 2315 | GCCATGTTCCCAACCTGGGGTACCCTGCTACTTTAACGCAGTGGTGTATACGGGCACTTAACCTGACCAATACAACTGGCCACCCAGCTGACCCCAAGCTCTATCTGGAGCCG      | 4 |
| wt-107070-107190 | 2316 | CCGGAGATGTTGTCTACATCACACTGGCTTTATCGCGGACTGCGTGGCTTCTACTACTCGCCTCGGGGAGGTTGGCGCTAATCAAGGCCGAAAAAGGTTCTGGGTCTTACAGC      | 4 |
| wt-107190-107310 | 2317 | CTCTGGGCTGGTCTCGGCAGTGGCTCCCAACCGTGTGTTTTGGCCATCTCAAGCTTGGTCTTACAGGCTTCTTCTTACAAGCACTTCTTCTCGGGC                       | 4 |
| wt-107310-107430 | 2318 | TTTGTGACTTTTTGCACTTCTGCGCTCAGTTCTACACGCTGCGCATGTGTGACCCGCTTCTCCCGGTCTGGTGGTCAAGGCCAGGACAACCTTATTTCCAGGACACCTTTTG       | 4 |
| wt-107430-107550 | 2319 | TGGTGGTGGTCTTCTACTGAAGCCGTAGTTACAAACCTGTACCTGGGTGCTTCCCTGGAGAGCTGGTCTTCTCGCTCAGCGTGTCTGGCCCTGGGCAACAGCTTTACTTT         | 4 |
| wt-107550-107670 | 2320 | ATGGTGGGGACATGGTGTGGAGCCGTAACCTTCTCATCTGCCATCTTCTGGTACATTCTGACGGAGGTGGTGGCCTCTTCTCGCGCAACCTTTGGCTTCTACTGC              | 4 |
| wt-107670-107790 | 2321 | GGCATGTTTCATCGCTCCATCATCTGATCTGCCCTGGTCAAGTACGAGGCCGCTTGTCTCCGCCAAGTGCACACCACTGTGGCCATCAATGTGGCCATCATACCTATCTGTGC      | 4 |
| wt-107790-107910 | 2322 | TGGTGGCCATGCTCATCAGGATGCGGATTTTCAAAGCATCGCCAGGCACTGACTATGCTCTGTCGGAGACGGTGAAGTGGAGCTAGAGTCAGAGCCAGGCGCTAGGCC           | 4 |
| wt-107910-108030 | 2323 | TGCGCACCGCCATCACCCGGGCCAACCGCCGCGCTTCTACGCTCATCTTCCAGTCAAGGAGACAGAGGCGCTCTACCAAGCCCTGCTTCCAGCCGCTTTTACCG               | 4 |
| wt-108030-108150 | 2324 | ATGACGACGGACAGGAGGAGATCTTCCCTAATGAATAAAACTTAAACACTGAGGTTACTTTCCCGTACTTCTTCCGGGAAACGAGGGGAGGCGGGAATTGGGTTAAGATAG        | 4 |
| wt-108150-108270 | 2325 | GGCGAAGGGTGGGGTGGGTGCAAGAATTGGGGCTGGGAATGGAGAGGGGAGTGGGCTAGGTGCCACACCCGGGTGCCAAGATAATGGATTGAGTAAGCATGGGGCTGTATCGGGT    | 4 |
| wt-108270-108390 | 2326 | CGCCGGTCTCAGGGGTGAGTGGGTGGGCATTGCATATTTTTGCCCGGTGCTGTTGGGCTTGGACTCGGGGTGATCATCCGTACCATACCCGCACCCGACCCAGTCCACAGCC       | 4 |
| wt-108390-108510 | 2327 | ACCGGCAAGTCTGGGCTCCACCCGTTATGCCTCCCGCTTACCATAAATAAAGAGATGTTAGTTGGTTTTTATTTGGCAAAACAGCAATTCATATTTACAGATCC               | 4 |
| wt-108510-108630 | 2328 | TCATCATATTCAGCCCTCGTTGGTTTTCCCGCAGGCCCTCCCTTCTCGGCCGCTATTAGCTTAGTAGTCTCCAGGTTAACTCCTCATAGTCATTATACAGGTTGATTATCCCGC     | 4 |
| wt-108630-108750 | 2329 | TCCACGTCGCTATGGAGTTGACTGCTGCTCGGCAAAAGAGACCAGAGGCCACCCATGCGCGGTGTCAAAAGTATTGTCTGCGTACGCTTTCAGGAGCCAGCCGCGGTGCTCAAGGTCT | 4 |
| wt-108750-108870 | 2330 | TACGGATGACAGAGTCCGCGAGACCAGGGTGTACCAGCACCGCCAGGGAATCTCCACCGAGGCGTCCAGAAGCAGGCTGAGCCGAGCGTGCAGGTGCGCGGGTCTAGAGGCGACC    | 8 |
| wt-108870-108990 | 2331 | GTTTTCGAAAGAGGCCGTCACAATGTTACCCGGGTGAGCAGTCTCCCGGGCTTGCACCCCACTGTGGCGGACGAGTCTCCAACAATTTGTATTGGAGGAGCACCTGGTAGA        | 4 |
| wt-108990-109110 | 2332 | AGTAGTTGTCCGTGGATTGATGAAGATGTTGACTGGGACCCGGCTTTAATACCAATGCGCCCCGATTTTCGTTGGTCCGTCATTACGTAGAGCATAGACTCCACCCCTGTTGG      | 4 |
| wt-109110-109230 | 2333 | CAGCTAGGCTGTCTGCCACAGGTGATGACCGGGGCCAGTTTTGCGCTTACGGACATCTTAAAGATTCCAGGCCATCTCTGCGTCAACAGATAGTCAACCTCCGAGGGCAACCCGCCAT | 4 |
| wt-109230-109350 | 2334 | CCGGGACGTACTCCAGGTAGGACGAGCTAAGAATTGATAAATCTGATAAATGACCTTGCATGGCCTTGTAAAGCGCAGTGTAGGATGGGTAGATGGGGTCAAATTTGACTTGG      | 4 |
| wt-109350-109470 | 2335 | AAAAGAGGTACTTGAAGCGCACTTAATCTCATAAATGCAGCTCCGGTCCGTGAACAGTAAAGTCTCCCTGTGACTCCACATTGACGCAAAAGTCCAGAGACCCCAAAATGCCAT     | 4 |
| wt-109470-109590 | 2336 | CCGTGGGACTAATCATAAAGCCAAATTGACGGTTGGCGGATGCGTCCCGCAGATGAGCTTACAGACAATGCTTGAACCGTGCCTCACACCCGAGGCCAAAGGCCACAGTCCCCCAA   | 4 |
| wt-109590-109710 | 2337 | AGTAGTATTGTGGAGATGGGAGTGGCTCAAACACCTTGGTGGTCCATTTCTAATGGTGGAGAGCAGCTTGAAGAGGAAATGATGCCATTTCCGAATATGTCCACATCAGGTTCT     | 4 |
| wt-109710-109830 | 2338 | CAGACTGCCCTGTCTGACATGGAAGTCCAGTCCAGTACGAGCAGAGAACAGTCTCTGCTGCGTGGCCTCTGATGCCCCAGTAAATGGATTTCAGGGGAGGACCGTCTTCTGTCAATCT | 4 |
| wt-109830-109950 | 2339 | CTTGACTAACGAGGAGACAAAGTACAGAAAGCCAGTTTACCAGAGAAGTCTTGTATTTGTTTACAGAGCAATAGAGATAGACAAAGCCGATGGCCGGCATCTGAGGTGGACGGTCAA  | 4 |
| wt-109950-110070 | 2340 | GGTTACGGACAAGGCCTCAGTCTCCGACTCGGAGGAAGCGGCAACAGTGTAGGAGGTCATCTCTCCATGGGATCTCGAGCTCATCCAGTCCGCCATCTGGACCAAGAAAGTCTG     | 4 |
| wt-110070-110190 | 2341 | TCTGCCAAGATTGACTACAGACCTGGAAGATGAGGGTCTCAAAACCTGGGCGACAGTTGAAGAAGTACTCTCTTGAACCTCTTTTAAAGCTCCGGCACCACTGCAAGAATTGA      | 4 |
| wt-110190-110310 | 2342 | CTCATATGCTCCCGGTGACATCCAGCAGGACTCTCGCCACAGGAGTCCAGGCCATGTCTAAGTTCAGGTTCCACATCTGCGACAGCACCTTCAACAGCACCACTTTGGGGTGC      | 4 |
| wt-110310-110430 | 2343 | AATTGCAAAAAGTAGAGCGGGTCCAGTCCAGTCCGTTCAAATCCCTGTACAGGTTGGGGATTTTGTGGTGGAGTACGAGGTCATGATACCATAGAGCAGCGAGTACCGAGCGAC     | 4 |
| wt-110550-110670 | 2345 | TCCTTGGCTATAGAAAATGGTCCCTCTGCAATAGAGCGATAGAGCTGCCGCGCTTGAAGAAGCTTACGCCACATCCAGCATCTTGTTCGGTCTGGAGGGGAAGCAGTCCCATAA     | 4 |
| wt-110670-110790 | 2346 | TCAGTCAAGACAGCTACCATGCCCCACATGGTGTCTGTAATCCACCAGGATGTTGCTGGGCTAATGTCGAATGGAAGAGGCCGAGTCCGATTGAGAAAGTAAACGGCATCT        | 4 |
| wt-110790-110910 | 2347 | TTGAGCCCTGAAAGCCCGCACCAGGGGCTCAATACTACCATCATGCCAGTGGCCATAATCTGGAGACTGCATCTGAACCTGGGGCATAAACAGGGCTGGCAGGACGTGACGGCCGAC  | 4 |



|                  |      |                                                                                                                               |   |
|------------------|------|-------------------------------------------------------------------------------------------------------------------------------|---|
| wt-110910-111030 | 2348 | AGGTAGTCCACCAGGGCCTGTCTGCCATCCTCGGCCGTGGCCCTCCCAATCTGAATCATGTGCACACACCATGAGCTCGTGATACAGCTCCGTGACAGAGTATAGAGTTTGACCGTG         | 4 |
| wt-111030-111150 | 2349 | GCATTATCTGCATGTGCATACACGGCCCGTAGCTCCCCGCCAGCAGATACTCGCAGGTAATGGGGAGGTGATCACAGCGCGTCATGTTCTCCGGCAGCTTTACATAGAGGGTCTCC          | 4 |
| wt-111150-111270 | 2350 | GTCATGTCAATGTTGGTACACCTCAGGTGTTTGTGCTGAAAGGTGAAGTAATCAATGACAGTACCTTCCCCAAAAGGCCTGGGTCTCTCGAGGGGGTCTGGGGAGACTCAAC              | 4 |
| wt-111270-111390 | 2351 | TGCGCACTGCTGGAGGAGTTCCTCGGGCTCAACTCCGCAGCCATATTACATCCATGTTCCCTCAAATGGCTCGAGGGCTGTCGAGCTCGTCTCGGCCCAAGCTCCTGCTCACGGAG          | 4 |
| wt-111390-111510 | 2352 | CTCCTCCACCCGCTAGCTGCTGTGATGTTTGGAAATTTAGTCTTGGTCTGGTCCGGTGACCACCCCTGTAGAGTGAATAAGTGTGTTGGACTCAAACGCTCCCTTCGGCTGGCG            | 4 |
| wt-111510-111630 | 2353 | CAGGGACTTAAGGCACCCGAGCAGTAACTGTGTTTCAAACAGCGTGGTCCCTCCAAATCTGCATGCGCTCACAGCCGCTCTTTTCTACCGAGGCTTCTAGTGTCTG                    | 4 |
| wt-111630-111750 | 2354 | GGCCACCACTCGCTTAGAATACTCATCTTCAATAGTCCACATGTCGCCCAACTTAGGGCCAGATCATACGTGGGTAGAGTACGGTAGTTCCAGTGGAGGCTCCATCCCGGTAATTTTC        | 4 |
| wt-111750-111870 | 2355 | CCACAGCGTCCACCATATATCTTCTGCCTCTCCCGTTAGAATTAGGCAAGGATCATACGTGTCCACCCGCCCTTTATACTGAGCGTTTAGGTTTTGTTATGTAGCAAGCACAAAAGGC        | 4 |
| wt-111870-111990 | 2356 | ACACACGAGTGATGCAAAGGGTTCCTGAGGCGAGGCGAGAGCTGTTTGGCCATTTTATTCAGGCGGCTAACGTCAAAGGGAGGAGCTATATCCTACCCTTCAGTCCAGCACGCTCCA         | 4 |
| wt-111990-112110 | 2357 | AGTACAGGGCATAACACACCTGGTGAGGTGTGCCAGGAATGCCTCTATGTTGGACATGGTGTATAAACCCGAGTGGGTAGCAGAATAGGGCCCTTTTCCCGCTGCCGACGCTAAA           | 4 |
| wt-112110-112230 | 2358 | CGCATGACGCTTTCGAGTGGACCTGGGCCGTAGAAGAGGGCCACATCAAGGAGTGGGTCTCAGGCACAGGAGGTCAGGTTTGGAGTGGCCCAATTTTGAAGGCT                      | 4 |
| wt-112230-112350 | 2359 | GACCTATAACCTCATCTTTGTTCCAGGCCAGCCCAATTCGCATAAGTCCCCATCAAAACCTCAAACACAGACCCTGCCCATTTTCAAGGCTGAGAGGGCTCCATCCCGCTGACCAAC         | 4 |
| wt-112350-112470 | 2360 | CTTGTCCACCAACTGCCATTCTTCTGGTAAACGGGGGTTGAGGGGCAAGAGCTCAAAGCCAGGCTCGAGAAGTATAGTATCCTCGGCCACACGGCCGGAGCTCCGGCCCTCGTGCC          | 4 |
| wt-112470-112590 | 2361 | AGGGCCTGTTGTCTGGGGGAGGATATGGACACGAGCAGGAAGCTTTGAGTGGCGTCTCCACCAGCTTAAATGCTCGGGGCTGCTGGCAGGCTCCAGTCCAGTCCAGACT                 | 4 |
| wt-112590-112710 | 2362 | GCCCATACCTCGGGCGAGCATCGGGTATCGGGCATATCGGCCCTTGACCGCGTTGAACATGCTGTATGCCTCGCAGCGCGGCCGTGACCCGAGAACCTAAGAAACGCCCTTCAGCAGG        | 4 |
| wt-112710-112830 | 2363 | ACAGCACCACGCAAGGCTGCCTGGGTGCCGAGACCCGAGTATTATGTACACAGGGCCAAAGTACAGAGGTGGGCTCACCTCTGGTGGGCACAATTCAGCCAGTAAATTTATTTGCC          | 4 |
| wt-112830-112950 | 2364 | CAATGCTTCGAGCATACTGCCGCCACTAGGCCCCAGGCCCGTGTGTTGAGCTTCTGATGAATCAATACCCTATGTTCCGGTGCAGGCCCTGCCCTTACACCCAGTCCAGGTCAGATGT        | 4 |
| wt-112950-113070 | 2365 | GCCTACTACCAGAGTACGCGACAGCTTACAGCGCTGCTGCCACCACCCAATCTTGAAGACTCCGAGGCCCTGACGGAATTCAGACCAGCGTGTCTCTGCCGTCGCATCCTTGAGG           | 4 |
| wt-113070-113190 | 2366 | ACCCCACTTTTGGAGATGAGAGATTTGTCCACAGCTGGCCAGCTTCTGAGTGGTCACTACAAGCACAAGCCCGCCGCTAGAAGCATTCCAGAAACAAGTAGTGTACATCTT               | 4 |
| wt-113190-113310 | 2367 | TTTATTTCTGATCTCAATCAAATCTTTAGAGATTACAGACACCATGTTTGACATCTTTCAAAGTGTCTTCGGATTGGAAGAAATGACGCTGGAGAAGCTGCACATTTTAAAGCAAAAAG       | 4 |
| wt-113310-113430 | 2368 | CCAGCGTGTCTTATCCCCAGGCGCCAGCCGCAAGACCTGGATAGTCTGGCCATCATCAGCTCATCTCTCGAATCTCTCAAACGTGCAAATAGGCTACGTGGCTCACCAGAAACATG          | 4 |
| wt-113430-113550 | 2369 | TGCGCTCGCCGTTTCACTGAATATTGACACCTTGACCAGCTTCGACTCCAAGCGGTAGAGTCAACAAGGAGACCAGCACCATCACGTTTAGGCACAGTGGGAAATCTCCA                | 4 |
| wt-113550-113670 | 2370 | GCACCGTAATGTGTCCACCTGCTTCAATAAGAAATGAAGACCTGACGTTTCACTACTGGCAATTTGATAGACATAGCCCGCTGTAAGGTCAGAAAATCGCAGCAGGGTCCAAGGTTG         | 4 |
| wt-113670-113790 | 2371 | TGCTGTACATGGGACCTTTCCATTAGCAAGAACCCTGCAGGACACGTGACATGTCGGGTGCAATTTGGGTGGGTTAAATCTCAGTCCACCACAAGGGGGCATCCTCCGGTTT              | 4 |
| wt-113790-113910 | 2372 | GAACATCAGACCCAAACAAGCCGATGCCAGTTATGGGTACGTAGTGGTGTTCAGGGCCGTGCATGGCAGCAGACAAGGACAGGTGCCAGATGTGCCTGGGCTATCGTCTCCGTCCA          | 4 |
| wt-113910-114030 | 2373 | GCCACGCAGGATGTTACAGTGGGCCCGGCCACCATAGCATGTGCACACATCCCCGTTATCATCTGGTTAGCAGGTTGATAAAATGGGTCAAGTGGCAATTTGGGCA                    | 4 |
| wt-114030-114150 | 2374 | GCACATCAGCATGTCCATGTTAACGAAAAACATGTACAGGGCCCTTCTGCATACAGGCACCCCGTCCAGTGGGATGATCTCCGAGGGTGTGATCTTCAGTCTTCTACTGT                | 4 |
| wt-114150-114270 | 2375 | TTTAAACGGCGGTTGAGGTGGTAAAGACCTGGCCCGTGGTCAAGTCTGTGCAGACTGTGCAGAGTGAACGGTTACCCCTAATCTCCACAGGCACCCCTCACCCACTGCATCTGAGAATACCCAAA | 4 |
| wt-114270-114390 | 2376 | GTACATGAGAGTCAAGGCTGTGTGGCCCTGGACTGCCTTAGTGAAGAGAACCTCGGGCCTGGCCACGGTGGCTAGGGTTCCATTGATGTAGACGGTACATAGGTGGGCTTCTTCTGGG        | 4 |
| wt-114390-114510 | 2377 | CTTCAGCACAATGAGGGTAACATTATGTAGGTTTTAGGAGTCCGGCTATCTGAGGCAGTACACAGCTGACACGGCGGTTGTGGCCGATAGACTTTTATCTGGGGCTGAGAGGCATC          | 4 |
| wt-114510-114630 | 2378 | GCTCAGCACCAGAGGCACTCCTGTTGAGGAACTTGCAGAGCTGTTCCCGGCTACTGTTCCGGCGGATGCCATGACGTGCCAGAAATATCCCTCTCCTCGGGGGTGGAGTCCCAAT           | 4 |
| wt-114630-114750 | 2379 | GGCCTTTAATAACAAGCCCGCAGCAGCACAATAATGCTGCCGTCCGATGTGGTGGCCAGTGGACGAGTCCCGTCACTTCCAAGGGCTACTAGTGGGAAGCAGCCCAACCA                | 4 |
| wt-114750-114870 | 2380 | GCCACCCGGGGGCTGGAGTCGATCACCTTACCACAGGCCAGGCCCTTCCCTATACAGCGGGTGGCTATCTATCCATAGGCAGGCATCCGGCGTCTTTGGTGCATTGGAGATAGTAG          | 4 |
| wt-114870-114990 | 2381 | CTTTCACCCAACTTTCCCAACTAACCCGTGTCTGGACAGTGAAGAAGCTTCCCTGATCAGGTCTGAATTTTTATAGATACGGGAGTAGGAGTGGGAATAACAACCTGGGATTTCTT          | 4 |
| wt-114990-115110 | 2382 | GTTGTGCTGTCCAGGCCTGCATGGCCAGTTTTTCCCTGAAGCTAGCAGAAATCTGAGGGCCACTGAAATGAGGAAGCGAAACTCCCTCTCTGGAGTCCCAAAATGAACCTCAGCAA          | 4 |
| wt-115110-115230 | 2383 | GATCTGTTGCTGGGGAGGCATGGGTGACAGCTGTACCTCTGTGACGTCTGCCCTGGGCACTCAGCTCTGGATATGTGACAACATAGAGAGCGTGGGGGTAAAAATATGAGCAATCCCC        | 4 |
| wt-115230-115350 | 2384 | TGACCAGGGCCCTGGACTCAGCAATGGCCCGACGGGTCTTAGAGAAAGAACAGGCACCCCTCGAGAGTCCCGCAGCCGACCCACAGTCCGCCAGTCCCTGCTCGGCCTCCGCCG            | 8 |
| wt-115350-115470 | 2385 | CTTCCCAACCGCGCTGCCCGGATGTTGCTGGGTTCTCGAGGGCTGGGTGCTTGAACACAGAGGTCTCAGCAGCCGCTTGGTCTCGGCCCGCCCTAAGTCTGAGCCCGAGGC               | 8 |
| wt-115470-115590 | 2386 | AAAGGGCCGACTCCAGCGTGGCCCAACCTCTGCTCCCTCTATTCTCCTCTTGCCTTATCTCCAATAGAATTTGCTTGGAGTACAGTGTGAGGTTGAGGTTGCTGACCTGGGCCGCGGCCA      | 4 |
| wt-115590-115710 | 2387 | CCGGCATATGCTCTATACCCGCCCTCGGGGGGCCAGGATCTATAGTATGGGTGCATAGCCGAGCAGACTCCTGGACCCAGAGGCTCTCTGATAAGATGCCGCTGGTCCAGAG              | 4 |
| wt-115710-115830 | 2388 | CCCTTTTGGCCCTTCAAAGAGAGACAGGTAATAAATCTGTAGCTCCCAACAGCCCTCCTTCATCGTAAATGAAAGGGCGGCCACGTGGAAGGGGTTGATAGCTCTGGAAGGCCCT           | 4 |
| wt-115830-115950 | 2389 | CATCGAGTACACTGGCACACTGGTAAACGTGCCCGATGGCTAGGCCGTCGGGGCAGCATGCCCGAGCAGCAAAACAGCGGCAGACCCTCGTGAAGCCGTCGGTCACTGAAGAGAG           | 4 |
| wt-115950-116070 | 2390 | TCTGGCACAGGCCCTCGCATTTGGCACGCGATTGGGGCAAAGCTGCCATAACCGGTGTCGGGAACAAATAGGTGCACGAGGAGGGGGTCCCGAGGCCACTCAACACTTGGTTGT            | 4 |
| wt-116070-116190 | 2391 | CAATGTGGACATCCATAGCTCTCATGCGTTTGGCTACAGCATATAGCGCTTGTCTGGTGGATTAAATAACAGGGCCCGTAGACAGTCTTTTGTGAGTAAATAGAGATGATGAC             | 4 |
| wt-116190-116310 | 2392 | ATGGATGTAGAGACTGAGGACCACATCCACCACCTTCTCGGAGGAGGCCCTAAACAGCATCAGGCAGCAAGGAAACACAAGGAAACAGGGCCGGATGTGAGGCCTCAGGCCCC             | 4 |
| wt-116310-116430 | 2393 | CTCCTGATCAAAGAGGGCTCGCTGACCCCGAGATGACATTTCTATTAGAAAAGTGTGATAGAGGTGATTGACCACAGTCTTAAACCAGGCCCTGGACTTGTTCAGGCTCCCACTTGTCT       | 4 |
| wt-116430-116550 | 2394 | CCGCTGGCTGTGTGCTTGTCCGATCTCGGTCCAGGGCTCAGCGCCGCTGGAATGCGGCCCTATGATGTGCTGTAAGGGCGCACACCACTCCCTATGGGTCTCAATCAGGGT               | 4 |
| wt-116550-116670 | 2395 | GCACCTCGTGGATCCATACATAGCTGTGACTCGCCACAGCCCCAGCAGGCAAAACAGGAGCCACTGCTCAGTTAACGGGAGATGGAACCTCAGCTTACTATACGACACAGTGGCGG          | 4 |
| wt-116670-116790 | 2397 | ACCTCCTGCTCAAAGAGACCTCCACCCGACGTAGACGCGGGCCACCGTCCGGGAAAGGTCAGTGGGGTCCAGCTCAGCAATTTCCAAATTTCTCTCCCAATAGTGCCTCGCTTC            | 4 |
| wt-116790-117030 | 2398 | TTATCCTGCTTTTACAGACATCCGGGGCAGACATTTACCTCTTGTGTTGTGGACGAGGCTAACTTTATCAAGAAGGAGGCCCTGCCGGCATCCTGGGCTTTATGCTCAGAAGGATGC         | 4 |
| wt-117030-117150 | 2399 | CAAGATTATCTTATCTCGTCTGTAACCTCGGCTGACCAGGCCACAGCTTTCTTTAAGCTGAAGGATGCTCAGGAGCGGCTGTAACGTGTAAGTTATGTGTGTCAGGAGCATCG             | 4 |

|                  |      |                                                                                                                             |   |
|------------------|------|-----------------------------------------------------------------------------------------------------------------------------|---|
| wt-117150-117270 | 2400 | GCAAGATTTTGACATGCAGGACAGCATGGTCTCATGCCCTGCTTTGCGCTGCACATCCCGTCTACATACCATGGACAGCAACATCCGAGCAACCACCAACCTCTTTCTGGACGGGGC       | 4 |
| wt-117270-117390 | 2401 | CTTTAGCACCGAGCTGATGGGTGACACCTCCTCGCTGAGCCAGGGTAGCCCTGAGCCGACTGTGCGTGACGATGCCATCAACCAGCTGGAGCTCTGCCGGTTGACACCCTCAACCCCG      | 4 |
| wt-117390-117510 | 2402 | AGTAGCCGGACGCTAGCCTCCTCCTCTACGTGTACGTTGATCCGGCTATACCAACAACACATCCGCATCAGGCACCGGAATCGCCGCCGTGACTCAGCAGGGCGGACCCTAACAG         | 4 |
| wt-117510-117630 | 2403 | GGTCATCGTCCGGCCTGGAACACTTCTCCTCAAGGACCTAACAGGGGACGCTGCCCTCCAGATCGCCACCTCGCTCGTGGCCCTCGTCTCCTCGATCGTCACCTGCACCCCACTT         | 4 |
| wt-117630-117750 | 2404 | GGAGGAGGTGAAGGTAGCCGTGGAGGCCAACAGCAGCAGTCCAGACTCTCGGGTGGCCATGGCTCAATCATTTGGGAAATCCTGCCCCCTCCCTGCGCTTCTGTCACCAAGGACAAAGAC    | 4 |
| wt-117750-117870 | 2405 | GTCCAGCTGCAGTGGCCATGACTCTGACTAATGAGAAGTCAAGGCCCTTTGAGAGGCTCATCTACGCAGTGAACACGGCCAGCCTTTCTGCCAGTCAGTCCAGCTTCCAACAC           | 4 |
| wt-117870-117990 | 2406 | CATCCAGCTCCTCTCGATCCGGTCTCTATCTCATCTGCAAGTCCAGGCTCAAGGCCATCAAGCCCTCTCCGGGAGTGTGTTGGTGTCTACACCTACACCCGCAAGCAGCCCACTCTCTCACGA | 4 |
| wt-117990-118110 | 2407 | CGTGTGGTTGCGCTAGTCATGGCTCATTCTCGCAACAACACAGAACACAGCTTCAAGAAAGTTCATTAACCTTTATTGACTACACCAGTCCCTGTAAAGCGACGGGTCTCGCGTG         | 4 |
| wt-118110-118230 | 2408 | ACGGCATTCTGAGCAGGGCTTCGTCCAGGGGCTTGTCTTGGCGGACATCATAGCCAGCCGCAAAATAGCAATAGCATCAGAAAAGTGAGCCCCACAAACACCAGTGTCCAGAGA          | 4 |
| wt-118230-118350 | 2409 | GGAAGACCCTAAGATAAAGATGGCTGCCTCTCATCTGGAACGGTGGGAAGCTCAGCAGTTGTTTTGTGGCATTGGACGTCCTTTGGAGGACAGCGTGGGGGCCAAGGTGGTAGCGTTG      | 4 |
| wt-118350-118470 | 2410 | GTAATACGGGTAGTAGCACTGGTGGTGGAGGAGCCTGGTGGTACATGCTAGTACACCCGTTGAGGTTCTGTTCCGGCTCGTGGCAGTGTCTGTGTCAGTAACTTAGTG                | 4 |
| wt-118470-118590 | 2411 | GTGACATTGATGGTGGATCGTGGAAAGTGTGGGACTGGTGCAGGCTCAAGGCTTCCAGTGAATGTACCCTGGAGTGTGTTGGTGTCTAGAAATAGCAGTTGGTTATAGGGCCGCTAGTC     | 4 |
| wt-118590-118710 | 2412 | GTGGTCAAGGTCGTAGACTGGTTTGTGCTAGGACCCGATGCCGACGGTGTGGTGTAGTACAGCCGTTGTGCCTGTCACGTTCCCGCCGAGGCCGTCGAACTGCCACTAGATGTCCAA       | 4 |
| wt-118710-118830 | 2413 | ATAAGGCTGTCTCACAGATGAGTATCATGGCCATAACAGCCCTGCCTTGTCTCTGGCGTGTGCCATCGCGTCTGGACGAGAAGGCTCCCGCCCTTTTATAGTGTCTCCACAC            | 4 |
| wt-118830-118950 | 2414 | CCAATACTCTACTGAACCATCACATACATGACCTCCTCGAGGTATGACAGGGAATGAGCGGTCCGTGAGCCGGTCAACACGACATTGCTCCGTTTATGCTCCAGCTGCCCTGACCAG       | 4 |
| wt-118950-119070 | 2415 | TTAGGACCCCTGACGGATGCTTTAACGGCCGCGTGCAGTTGGTCAACAATGACGGCCCTAAAGGCCAACACATCCTGAAGCAGGGCGTAGGAATGGTACCAACTCGGGGCCACCCCA       | 4 |
| wt-119070-119190 | 2416 | TCAAAGACATAAATATGCTCATAGTGGCAGTGATGATGCATCACCACACAGCAGTCCGACAGCCCTCTGCATATCTTTGACAAAGCCGCTTCAACTCGGCCACTGGCTCTGGTACG        | 4 |
| wt-119190-119310 | 2417 | TTAAATGCTCTGTTCTATTAGTACAGCCTGTAGATTGGGCACCCAGACTCAAAAAGTGCAGCTACATGAAGGGCAGCCGCTCAAATCCACCATGACCCCATGGCTGTCCGTGTTG         | 4 |
| wt-119310-119430 | 2418 | TTGGGTAATAAGTCACATTGTAATGACCACGGCCGGGATAAGGGTGAACCTTGCAGAATGGATTGGTCGGACACCATAAGACAGGGGCACCCCAAAATACGCCCCCTTACCCTCGA        | 4 |
| wt-119430-119550 | 2419 | AGCACCTTGGCCCCACCAGGCATAAAGCTGGGCAAAAAGAGTGGGTTAAACCAAAAGGCGAGTAGGGCCAGGAACGCCAAATAGCAGCAGTAATAGATGAAAACAAAGCTCAGCATGAAA    | 4 |
| wt-119550-119670 | 2420 | CAGCGTGGAGGCTCAGTAGGGTCTCGCTCTCCATCATAGACATCTTCTTGAATCTCATTCTCTCACCAGTACCTCGCTCTCATCAGGAGGGGGCCATGGCTGCCATTCTACCA           | 4 |
| wt-119670-119790 | 2421 | GTTAACGAGGAGAGAGAGTAGTCCGCGGAAATTTGGTCCCATCTGCCCTGACGAGGCCAGTGGTGCATCCATCTCCGCGCTCCGTTCTTACGCTTTGGCATTGGTCGGGTC             | 4 |
| wt-119790-119910 | 2422 | CGGGTGGTCTGATTTGATTCTGATCCTGGTATTGGTCTTGGTCTCTCTCCCCATTGGCATGGATTGGCATAGTGGGTGGTCTCAGGCTCAGGTTCCGGCCCTGGGACGGCAGCA          | 4 |
| wt-119910-120030 | 2423 | GCCGCCGGACGGTGAAGTCTGGAAGGTAGAGGCCCTGCCCTCCGAGGTCGTGGGGCCGAGCCTTATAAAGACTTCCACCCTCTCCCGCTGGCAAGACACGCCCTCGTGGACC            | 8 |
| wt-120030-120150 | 2424 | ACGCCATCTCTCCCGCTGATTGTGTGGCTGACGGTGGCCGTGTCCACCGCCACTTGTTCATCGACCATGGTACCCCTTTATCTTAACCAGCAAGTGGCCGTGAGGGTCTCTTGAGA        | 4 |
| wt-120150-120270 | 2425 | GTATGCCGCTGTGGCAAGCGAGGCCCAAAATTAATAGTGTGCAAAAGACTGTAGGTAGGTATCATCACAGCATCGTGTATAATCATCCGCCACTGACAGGTATCCAGGCTCAT           | 4 |
| wt-120270-120390 | 2426 | CCGGGCTATCTATCCGGCACCATTCTCTGGAAGAGATTCAAGAGGTGCTGATGCTCATGCCGATAAGGCTCGACCAGGCGCATACTGCCCTGGGACGAGGGTACCATTGATGCA          | 4 |
| wt-120390-120510 | 2427 | AAAGTAGAGACTCAGATTGTCCAGCAGGGCCAAGCCAAAGGGCCCTGGCACCTCCGGGAGGCCCAACTCGTAGTGTGTCGACCCAGGATGAAAACAGAGCCAAAGTGCATGTATACAG      | 4 |
| wt-120510-120630 | 2428 | CATGTCTCGTTCCTCCGGAGCCTGCATGACAACCCGGGAGTACAGTTAAACAGGAGAATCTTCTGCAGCACCTCTCTGCTATGGGCGTAGGCAGCACCATGGGAAAACAAATGTCCAC      | 4 |
| wt-120630-120750 | 2429 | ATCATTGGACTCTAACTTACCGTGGATGCTCTCGTCCAAATACCGGGGCATAACACTGAGGCTCCCGTCCCATGCCACTGGAAAAGGGGCTGGTACTTGTCTTAATGGCGTAGGT         | 4 |
| wt-120750-120870 | 2430 | CTGACCTGGAACAATCTTGGTGTAGTATCAAACCTGCCACGCTAACCTCATCCAGCACGGCCAGGGTCAATCAGACAGGTAGTTGTACATGGACACGTAGTCCGGGACCGTCTTAGAGA     | 4 |
| wt-120870-120990 | 2431 | GTACACCTGACCCAAGCCAACTCCCTGCACATCTCGTCCGCTGAGTGGAAAGCCAGGGTAAGATGCAGCCAATCTCTGTGTCATCTGGCAATCTCATGGTATACAGACGAGGAGA         | 4 |
| wt-120990-121110 | 2432 | GAGAGACTACCACTTTCAAATCCATCTTTATTGACAATTAACAAAACACCTTATTTCCAACTTTAATATTCTTCCGACCCGCCCACTCTTCAAATATATAGTCCGTAATG              | 4 |
| wt-121110-121230 | 2433 | GATGGGGCGTGGTCTGTTTGACAGACATAAACTCATCGATGAGTGCCTGGGAGGAGGCTGAGAGTGGGGGAATGCCTCCTGCAGAAAAGTGCAGGGCTGCTCCAGAAAACAGTCACT       | 4 |
| wt-121230-121350 | 2434 | GCCAGCAATCACTACAACTGCACCTCTGTGTTGCTGGTGGCTGGTGGCCCTCAAGTCCGCTGGCTGACTCGTTGACCATGTTGTAGAGTCCCTGTTGTTGGCAGAAAGCTCCTCCTT       | 4 |
| wt-121350-121470 | 2435 | GTTGAAAATGCCCGCAGGGGCTGTAGAGGCCGGGACGGCCCTGTGGCGATAGGAGGAGTTGTACATGATGCACCCAGAGAACCAGCTGAGATGCCAGGGATTACAGTCTCCG            | 4 |
| wt-121470-121590 | 2436 | GTATTATAGCCGCATCCGGGCGAAGTGGTATAGATGAGCCCTCGGCAACCTCTGATTGTAGTTTTCACAGGAGACCACAGGCGCCCGTCCCTTGGAGAGTTGGACTTTTG              | 4 |
| wt-121590-121710 | 2437 | AAAATAAGCCACGCTCGCCGTGACCGGTGTTACGATAATCTCACAGGTGGCCTGCTGGCCGTGGCAGAGTCCGAGTCCATTAACATTAGTCATACCTGCCAGGTATGCTCCGGGTC        | 4 |
| wt-121710-121830 | 2438 | CCGAAGCAGCGTCCCATTGCGCTGAGCGCCACCTTGGCCTGATGTAGTCACTTGTCTGGTGGCAAAGGCCCTCGCCGGAAGACGCTAAAGAAGTCTGGGTGTGGATACCCAT            | 4 |
| wt-121830-121950 | 2439 | GTCAGTAGTATGGCCGCCACCTGGCCGGAGTCATGGTGGAGTATAACTAAGCCGGTGTGATGAGGCCATCTCGTATGCACCTCAAAGTACCAGCTCCACCTGGCCTCCCG              | 4 |
| wt-121950-122070 | 2440 | GCGGCTAACATTTGGGGTCCCAATGAACATGGATGTTGAGGCCCTGGAGCTAAACAATATGTTTTACAGAGGATCTCATCGTCCGACACGCTCATGGCCACCCCTGGGTGGATCTT        | 4 |
| wt-122070-122190 | 2441 | GAGCTTGGCCTGGGCAATATAGGCCATGGGGACATCTTGATGTGCATGGCGGTCACTTCACTGATTGAAACGAGGGGAAGGACATTCGGCCCGTATTTGCCCATGGGCGAGCGGTG        | 4 |
| wt-122190-122310 | 2442 | CCACTCCCGTACTCGCAAAGAGCTGCTTGGCCGGTTGAAGGCTTCCAGGCCCGCTGCTGAGGATTGCGCATAACAAGGTGGAACAATCCTGGTGCATGGTGGCAGCCACTCGCGG         | 4 |
| wt-122310-122430 | 2443 | GTCCCGTAAAACATATGAAAAGGAATGGCGTAAAAGAGACACTGGGTGACGGCCCGGTCCTCTCGGAGAAGGCAAAAGGCCACAGCCCGTTACCAAAAACAGTCTGCTCTGCCGCTT       | 4 |
| wt-122430-122550 | 2444 | GTCGGCGGATTCCGGGCCAGCTGCTCGCTAACGTCATTGTCCACCACACACGACGACGCGGCGGTAAGTGGGGCAGGTCATGAATGAGGCGCTGAGTCCCTGATCATGCCACGGT         | 4 |
| wt-122550-122670 | 2445 | GGGGCGGAGTCCGAGATCTCCAGCAGATCCCTGACGCTCCATTCTCCAAATTTGTCAGGATGTCTCGTCCCTGGTAAAATGGTGGCTGAAGGCTGGCCGTTGATAGGCCAGGGTCTG       | 4 |
| wt-122670-122790 | 2446 | GGCCACGCTGAAAGTCCACCCGAGCCGACATGGGGCATTGGTGCAGGTTGGGAGGAAAACAGTAGTAAAGATCTTTCCAGCACATCCGCATGCCCTCATCTACATAAGGGCC            | 4 |
| wt-122790-122910 | 2447 | TAGGTGCAGAGGAAATCGTGGTCTCCGTTAACCCTGACCGTACAAGGCCACAAATGGGCAGCATCTCATCATGTTTCCAACCTCAATAAACTGGGCGCGGCCAG                    | 4 |
| wt-122910-123030 | 2448 | GGTGTACGCTAAACCTCATTTCGATAAATACTGGGGGCCGGTCACTAACGGTGAAGAAGTGGGTGAAATGTCTGTGAGGCCACCGGGGGAGCAGGTTAGGGTCCAGGAGAC             | 4 |
| wt-123030-123150 | 2449 | GCAGACATACTGACCCACGCTCTCATCCCCACAACATCTGACCCGGCCAGGCGCATCAGGGCTGCTCTAGGGCTATAAGTCCCCATAGATTTTTCTATACATGGAATAGGCCTCCTT       | 4 |
| wt-123150-123270 | 2450 | GGAGATGGCGTATTTCCAGGTGGCGGAGATGAACCTTGATCATGAAAAGCTGTTCAAAAGGCCAAGCCTCCCTGACCGTCCCAGTAGGTGTGATGCACAGGGACACAAAGGCAC          | 4 |

|                  |      |                                                                                                                          |   |
|------------------|------|--------------------------------------------------------------------------------------------------------------------------|---|
| wt-123270-123390 | 2451 | GTTATGACAAACCTTTTCTCAAACCCGTTGGATCATAGCTCGACTACGTAGAAAGAGGCTGGATAGGCAGTGTATAGGCAGTATCCTGCACAGTCTCAATAACGGCCTGATCCACCAC   | 4 |
| wt-123390-123510 | 2452 | GTGGGCCAGAGATGTGGCGGTCTCAAACCTGCTGCCCGGGCCCTTTGGAATGCAGCTGGGGCCAGGGAGTCGGCAGGTTACCCACCATTAGCCGGTGCACAGCCCTGTGCCCTGGCCCT  | 8 |
| wt-123510-123630 | 2453 | CTCCCGGCATCCCTGCCAATGTAAATATCATAAAGGGGGTGCAGCTCCAGCCGCAGCAGGTATAAATGGACGGGTGGAGGAAGTCTTCGGTGGGCAGCCCGCACTTGAGAGCTATATC   | 4 |
| wt-123630-123750 | 2454 | TGTACAGGGGGCTGCATACCTGTTATCATAGAACCTCCACAAATAACAAAGCACATTTCATGTATTGGGCCCTCTGTGTTGCAGGGAGTAGGTTCTCGCCGCTGTCTCGCGGGCCGGGGC | 4 |
| wt-123750-123870 | 2455 | CGCGTTGAGGCTGTTTAGGGTATGGCGGGGTGTGGAGTCCGGGGTGACAGAGAACCCTTGAGAGCATCTGTAGGTTAAACGCGAGGAGAAGGTTATTCTTGTTTACGATCCCATGCCCT  | 4 |
| wt-123870-123990 | 2456 | CACCGTAGCTGCTGTGGGGTGTCCAGCATTTTGTAGCGCGGGAGCTGTACTTGGATTGGCCATAAACAGGCCCACTGGGAATAGTAGCTACTGCATCTCTGTGTAG               | 4 |
| wt-123990-124110 | 2457 | GGGGTATGGGGACTGAGTGTCACTTTTGCAGGCTTTCCAGGCTTCCAGCCAGCCGCGTGGTTCGCCAGCTTGTATGACGGCGGCTGAGATCGGCACCCGGGGCTGATCCTCGACCCCTGC | 4 |
| wt-124110-124230 | 2458 | GGCCACAGCCGGCAGGTGAGACTTGGTGTCTCCGGCTTTTCCGGTGAGTCCACGATCTAGCCATGAAATGCTCAAACGTACGCATCACGGCCCGTAGCTCACGGCAGTGACCAGGTT    | 4 |
| wt-124230-124350 | 2459 | CTCCCGCGTACCACAAAAGAGCATAGCTCGAGGGCCCATTAATCTGGTGTGCGCCCTCTCACCCAGGAAGGTCAAGAGCTGGCGCAGAACGTTGTCCGGTGCATAAAACCCCGCC      | 4 |
| wt-124350-124470 | 2460 | CACTGGCTCTCCCGCTTGGCGGTGCTGTAGTACTGACCCCTTGAGCAGCTCTCCCGGACACGGCCGCTACCATCTCAGAGAGACGGCTTCGCACGACTGAGAAAACCCGGAGCC       | 4 |
| wt-124470-124590 | 2461 | CATGTTCTCGCCCGGTCCAGGAAGAAGGAGTGTCCAGCAGATGCCTTTGAACATGGCAATGAGGTGACAGTTCGAGAGTTCGGAGAACCCTCTCAGTGAAGGTGGGATCCCGCAG      | 4 |
| wt-124590-124710 | 2462 | GGTCTGACAGATAAACATGGGAGGGCATGGCGAAGCTTCCACTCAGGACGGTGAATGAGGCCCTTCCAGGGCATCGACCCAAACTGTAGGGCCGAGGCCACGCTTTCGACAGC        | 4 |
| wt-124710-124830 | 2463 | CCCCAGTACTCTCGCTACTCGACCGGGGTCTCGGGGACTATGACGAGTCTCCAGATCCAGCATGGACAGTTCCTATTCCGTAATAATGTTGGTGTGTTGGCAATTTTGACCACAAT     | 4 |
| wt-124830-124950 | 2464 | GAATGTCCGCTGCTTGTGGTCTCCTTCGTCGCCCGTGGAGCAATGGTGGGACGGAGATTGAAATGAATCTTGCATCCGTCATACGACTCAGGCTTTGAAATCCGTGTTACACA        | 4 |
| wt-124950-125070 | 2465 | GGACACGGCCAGTGCCGCTCCAGGAAGCGAACAATTTGGATGGCGTTCGTGTAGACCCCGAGTAGCACCTCAAACCTTGATGCCCGCCTCTCGGCATCCTTCCACCAGCAGGTCAAA    | 4 |
| wt-125070-125190 | 2466 | GCTATGAACAACCCCTCAGCCGCTGACTGCCGCGAGTTCGAGAGCAGGTCCGCATCCACCGTCAGATAGGGGAAGGGTCTGTTTCCACACCCTCATTTGAGGCCATGACACAAGGTAA   | 4 |
| wt-125190-125310 | 2467 | GAGGGAGATGGGGGAGGTCTCGAGGGCTCTCTTACAGCTGGGTCTTTTTACGCCCTGGCCGCAACCCGAGCCACCCACACTTCCGAGGATGCTACCCTCTAATCAAAATGGTT        | 4 |
| wt-125310-125430 | 2468 | GGACACGGCCCTGGCAGGGAGGCCACCTTTACGCGTGTGGGCTATGCGTGGCTTCTACTCGCGTATCCGAATGAATGACTGCCAGGAGCTGCCACCCGGTTAATAAATCTGAG        | 4 |
| wt-125430-125550 | 2469 | TCCGGCACCGTCCCTGGCCCTTGGAGTCCAGAGTCTGGAGCATACAGACTGCGAAATATGGTCTCTGCCACCCTGACCACGCTGCCACCTCCCGGTGCCAGGGTCATCACATA        | 4 |
| wt-125550-125670 | 2470 | CACCGACTGCCCGGTTCCATAAACACAGCTCAATGTTTCGCCTTATCATCCGCTACTTGTCTCATCAACAATTTGAGCGCTGCTTCGAGCAGTTCGCGCGTGGTCCCGCGTGGCT      | 4 |
| wt-125670-125790 | 2471 | CCTAGGGACCTGAAGCGAAACTGCAAAAGATGCTGGCTCATCTGAATCAGGTTACCAGGATCCCCCTGTCCGCCCTTCCAGCGGGGGGAGCCAGACTCAAGTCCACTTCTTCTC       | 4 |
| wt-125790-125910 | 2472 | CTGGAGCAGTTCATGCTGTATGCGCAAACTGCCACTCCGGGAGATTGAGCAGAGGGGCGCCCAACTGACCCACCACCACATCTGATGGTACTCTGTACCAGCCCTTCC             | 4 |
| wt-125910-126030 | 2473 | GCAGACCCATTCTGACACCGCAGCGGTGCTCTATACCGCTTCTGACCTGTTGCAACTGCACCTGCCCAATATCTCCATCCAGCAGTGAAGGCCGGGACAGACCAGGGGACCTGGA      | 4 |
| wt-126030-126150 | 2474 | GATCATTCTACAGAGTAACGGCGGAGGGAGCCCGCAGCTTCCAGTCCCCTCTCCCAACTGGCTCCCTATTGGATGCATAGTGTGCTGCTCCCTGCTGCCGGAGGTGCTCGTGGG       | 4 |
| wt-126150-126270 | 2475 | GCACCAGGAGCTGCTCCGCTCGGCTCCAGAAAGCCAGGGAGGGCAGACGGATGTGAGTCCGGCCCGGACCCGCGGAGACTGGTGGCCCTCTCGCAAGGGGAAGATGGGGCACCTAA     | 8 |
| wt-126270-126390 | 2476 | AGACCCCTCTGGGACCGTTTGGACACCCCGGGGGCCCGCCGGCCAAAGAGCGAAGACGAGGAGTGTGAGCGTCCGACGCGCCCTCCACCCCGCTCGATCCAGTCCAAAGCTTC        | 8 |
| wt-126390-126510 | 2477 | CCGGTTGGTCCCGTGGGGCTGGGTTTCGCTGCTGTTCAACACCAATCGGGTGATCAACTAAATGGTGTGCTCAGAGCCCTGGTGAAGATCGAGTTTGAATGTCCCGCC             | 4 |
| wt-126510-126630 | 2478 | CCTCATCAACAATTTGTAGCCCGCAAGTACGTGGTGAAGAGACGGCGTTCCACCCTGATCTATTTACGACGAGGGTGGGGCCCAACTAGCCATCAATGTCAATATCAGTGGCAC       | 4 |
| wt-126630-126750 | 2479 | CTATCTGAGCTTCTATTGGCCATGACGTACTGCGGTGCTTCTGCTGTGGAGGCTATTTATCCCGCGCGGTGTCAAACCTGGAAGTCTGACTCTAGATCTCCATGGGCTGGAAAAATCA   | 4 |
| wt-126750-126870 | 2480 | GAGCCTAGTACAGAGAGAACCGAAGCGGGTCTTTTGGACTACCAACTTCCCTCGGTGGTGTCTGCCGGGAGCGTCTCAACGTGTCTGGTTAAGGCCGCAACTGCCACCATATCTCG     | 4 |
| wt-126870-126990 | 2481 | AGTGCACGGGCAGACATTGGAGCAGCACCTGATCCGTGAAATCACCCCATCGTGACGCATCGAGAGGCAAAAATCTCCCGGATTA AAAACCCGGCTTTTACCCTGCTAGAGCTACGCAA | 4 |
| wt-126990-127110 | 2482 | TCGGAGTCAGATCAAGTGTGCACAAGCTTTCTGGAAGGCTGCTAGACTGCGCTCCCTCTGCGCTGGATCCAGCTGTATCAACCGAATCGCTCCGAGGGCTGTTTGATT             | 4 |
| wt-127110-127230 | 2483 | CTCCAAGAGAAGCATCGCCCACTCCAAAAACCGACAGAGTGCAGGCTTTCGGTCCAGACATTCGGCGAACGTGACAAAAGCTGGTGAAGCAGCGCAAGACCCGCTGGACATACT       | 4 |
| wt-127230-127350 | 2484 | GGCCGTAACGCTAATTTTAAACGAGGTGAAGCATCAGGTTAATCTAAGACAGTCACTATTTCTGACCCTCTGAGGCACATCCGCCGACGCTGGGGCTGGGCGTGTCTCCGT          | 4 |
| wt-127350-127470 | 2485 | AAAACGAGAGATTACCCTTCTCCTGGCCACCTCGCGAAAAGACAGCCCATCCACTGCGGTGATGCTCAAGTGAAGCAGCCCGGGCCCGCTTATTACGGGGCGGTGCACCTGC         | 4 |
| wt-127470-127590 | 2486 | CATCGGGACAGATTGCTTCCACACCATCCACAGCCCACTTTGCCCTCGCGCTGGGACTGCCTGGGGAAAATGTACCCATCCCGGCCCTTCCGTGCTCGGGCTCAACGCTCCGTG       | 4 |
| wt-127590-127710 | 2487 | AGAGCCTACCCATGACCAACATGAGGGCACCAGTATCTCGCTGGCTCGCTCATCTTCCGCCCCAACCCCTATATCTAGAGGGACAGCTGACGGTGGCATGACACAGGACAACGGCA     | 4 |
| wt-127710-127830 | 2488 | TTCCCGTGTCTTTTGGCAGGCTGTCAATGAGGTA AAAAGCGGGCGCTGAGTCCCAACATTAAGCCTCTCGCAACTATGATAGCAGAAGACTCCTGCCTGAATCAGATCGCCCTTTT    | 4 |
| wt-127830-127950 | 2489 | CCGCATCAGAGCACCCGCTTCTCCATGTTGAGTCCGTA AAAACGAGTCCGGGTGATGAGGGAGCAAAACCCGGCGCACCATCCGGGATATTCTGGAGATCCCGGTGACTGTGCTCT    | 4 |
| wt-127950-128070 | 2490 | CATCCTGCAACTGTCTCCACCAAGTCCATCTGAAAAAGGCACCGGAGCCCGACCTCGGGAGCCCAAGCCACTTCGATGCCACCCCTATGCCGCATCTTTACGACATCGGGC          | 4 |
| wt-128070-128190 | 2491 | GACAGGTGCCAAGCTGGGCAATGCCCGCGCGCAGGTGAGCAACGTGCTCATCGCAACCGCTCCCAACTCTCAAGGCTGGTGCCTAATCCGGACTGCTGCTCTCCAGATT            | 4 |
| wt-128190-128310 | 2492 | TGTACCTCAAGCAGTGTGCTAAAGAGTCTGAATCTGGAGAATAAGTGCAGGACTTTGAGGCCATTTCACTCCCGCTGTATACCATCAGTGGGCTGAAACCAAGGCCTTTGAGA        | 4 |
| wt-128310-128430 | 2493 | AGCTGGTGAGCAAGCCAAAAACCGTAGAGAACAATGCTTTTGCCTCAACAGCATCTGTTCCACTCTACACTCCAGATGCTGTCCCGGATGTCAATAACCCAAACATTAGCCTGG       | 4 |
| wt-128430-128550 | 2494 | CTCTAGAGAAGTATTTCTCATGTTCCCTCCCTCAGGCACCATATGAGAAATGTCAGATTGCGCACCCCATCGTCCGGCTTGTGCAAGGGGCTGAGCTTGGCACCATGGCACAGT       | 4 |
| wt-128550-128670 | 2495 | TTCTAGGAAAGTACATCAAGGTCAAGAGGAAACTGGAATGTACACTGGTCAAGCTTTATTACCTGCTGCGCATCAAAGGAAAAACATAACAATCTTGTGAACGAGAAAGATACCCA     | 4 |
| wt-128670-128790 | 2496 | GAGCAAAAGCAATAAAGTACAGGATTATTGCCAAAAACAGTGTGCTTTTCTCATACAGGCCCGCAATTTCCATGACAGTCCCGTGGTGGTTCAGCAGCAGATAGTGAACGTGGAGGT    | 4 |
| wt-128790-128910 | 2497 | TGTCAAATCAAAGTAGTTGGAGCTCAAGTAGGAGTTTGGACTTCTGGGAGGTGATGAGTGTGATTTCAGGCCCTTCTTTTCATCATAACTGAGCAGGGCAAGGCCAAAAAA          | 4 |
| wt-128910-129030 | 2498 | TGCAGGATTTCTGCGCTGCTGAAATTTGAACTTTGGAATCTGGCGGGCTCCCGACAGCACCTGCGAACAATTTATTCAATTAACGGGGGAGAGAAAGAGAGACTGCTGA            | 4 |
| wt-129030-129150 | 2499 | GATAGGTGGTGTGCTGCGCTGTATAGCCCGAGCTCGGACCTCAGCTACTAGAGATTAGAATGTACATTGATGAGCGGATAATCATCAGAACCTTTGTCGAGCTGTCCAGCTT         | 4 |
| wt-129150-129270 | 2500 | TGTAGCGGGGAGATGCCACGCATCCCTGTCTTCTCGTCCAAAGAGACCGCCCAAGAAACCCATCCACAGCATTGAAACGGCCGCTGGTCCAGGCTTGCCTCTGGGGGCCATGC        | 4 |
| wt-129270-129390 | 2501 | TCAGCAGCTTGTCTGTGAGGTCAAATCGTAGGCTGAGGTAGCACGGTGAAGAAGCCGCTCTGTGCCAGGGCTAGCCCGCAAAAACCTCCCAATCTTAGGGCCGAGCACA            | 4 |

|                  |      |                                                                                                                               |   |
|------------------|------|-------------------------------------------------------------------------------------------------------------------------------|---|
| wt-129390-129510 | 2502 | GGGCGGTGGACAGCAGTTGGTATAGGGCAAGTGGGCCCCGGGTAGTACAGTTACAGCCCAACTCGCGTAGCACCAGTGGCTGCCGATAAACAGGGTCTCTCATCACGGTATGCA            | 4 |
| wt-129510-129630 | 2503 | GGGGCTGGA AAAAGGGGGTGGCGTTGTAGGCCGAGAGAAGCACAGATGTGGCGCCTCCAATGAGCCACTGTAAACCCCGGCCTTGGGGTAGCCGACGGTGGCTAACCTCAGCCGCTACT      | 4 |
| wt-129630-129750 | 2504 | CCTGTTTCTCAGTAGTCAGGTGACCCAGCTCCTCCATCTTGACCGTGGCCATCAGCATGGCGGCCAAGCGCTCCAGCCCGTAGGATTGCATGCCCTTGACAGTGGCCCAATAACATATGC      | 4 |
| wt-129750-129870 | 2505 | CGATGATGCTTTT CAGGACAGCTACGCTCAAGAAGAGCTCTTGGCCAAACCAGCGGAGGTCCACGCGACCCATTGCCAGTCTCACCCACAGCATGACCCACCTTAAAGAAGGCCACAGAAACCT | 4 |
| wt-129870-129990 | 2506 | CAAACATGGTAGTCAGCGTTTCCGTGTCCAGTTCGGGCTCCCGGACGCTCCCTTCACTCCAGCAGGACCCAGTTTCTGGAGAACGTAGCGAGCGTAGCTGGCGGCTGTATGGTGCACGG       | 4 |
| wt-129990-130110 | 2507 | CTCGGAAAACATATCCTT CAGTGTGGTACAAGTAGTTGTGAAAGTTGGCATAATGCACAAAGGTTGTAACAATCACCAGGGAATAGTCCCGCTTGGCAGCTGTTGAAGTAGGGT           | 4 |
| wt-130110-130230 | 2508 | AACTAAAGGCCCTCAGATCCGGCAGGCTCTCGTCTTGCCTGCTTGCCTGCTTGCCTGCTTGCCTGCTTGCCTGCTTGCCTGCTTGCCTGCTTGCCTGCTTGCCTGCTTGCCTGCTTGCCTGCT   | 4 |
| wt-130230-130350 | 2509 | TGGCCCCCGTGTACTGAAACTGTCCCGTGTGATGGACAGGGCCACATAAGACAAGTGACAGCGCAGCTGATAAAAAGACATAGCTGTGTGGCCCGTGTGGGCAGCATGGTGCCAAATAT       | 4 |
| wt-130350-130470 | 2510 | AGTAGAAGAGCTGCTTCTCAAGGGGGGCACTAAGCATGCAGGCGAGGGGAATTGAGCCCGCTAATGACTCCGGGATGGACCTTAGATGCATCCACTTGCATGGATCCTCAGAGACAGCAG      | 4 |
| wt-130470-130590 | 2511 | GGATATCGACAGGCTCGGCCAGCGCAATACCAAGGGTACCAGACGCTTTGTAATAA TACTTGTAGCGGTTAAGCATAGACGCCAAATCTTCGGTGACATTTGCCCTCTCCACAGCGCCT      | 4 |
| wt-130590-130710 | 2512 | CTGGGCTAAGGCTGGGACCTTGCATCAGTTCGGTCCATGGATGGTGTATGCGAAGCATGCCCTCTATGTCCAGGTGCAGCTTAACCTCGTGAGGCTGGCAGCCCACTCC                 | 4 |
| wt-130710-130830 | 2513 | ATAGCAACACCAGGCAAAAACACAGAGCAACTGCTCTAGTCCCGATTCCCTCTCAAAATCAGATATCCCTTCTCAGACCAGCCCAATCGAAAAACTGAGATCGTATTGCCGGA             | 4 |
| wt-130830-130950 | 2514 | TTCTTCAATGCCTGCATGTAATCTCCGTCACAGTCCAGGTAATCGTCTGAAACTCTGAGAGGTCACAAAGCACAAACTGAAGGTAGGCTAGCGTTCGGGTGAACGCAAGCAAACT           | 4 |
| wt-130950-131070 | 2515 | TCCAACAACACCGGCTCGGCTCGGAAAGGCTGTATGACTTCCCTAAGTACACTAAAGATGCTGTTCTTATACAGCTTCTCGGCCACACCCTTCAATATGGGGGTGGCTTTGATGA           | 4 |
| wt-131070-131190 | 2516 | CATACTGTCGTGATTGTTGTAGACCGGCACATACCTTCAACATGCTCCTGGGGGCAAAATACTGTGTTAGGAGCCAGGCACAGTAAACGGCGTGATATGCATCGTTGACACTCTTCAGG       | 4 |
| wt-131190-131310 | 2517 | TAGCCAGCATCCAGTCTGACTCATGTTTCTCCCTCGCTTCTTACGGCGGCGCATGTTCTCTCCACGTTTAACTTATCCAGACTATGGTGTCCCGGGTCTGGGTAAACGTGGCC             | 4 |
| wt-131310-131430 | 2518 | AAAACCTTGAATAAAGTCACTATAGGAGAGAGAGCTGGCTCCGGAGCAGCATTAGAGGGAAAACACGGAGCCGACAGCAAAATGGCGATCATGCAAAATCCAACAACTCAGGGGCGCGACT     | 4 |
| wt-131430-131550 | 2519 | GACCTGGCACCAGACTCGGTAACCAGCAAGCTCCGCTTCTAGAGGCCAAGACTCTGAAAGGGTGGTAAATTTTCACTGGCATGCTAAAACCTCAGCCGACGTGCTTCCCTTCCATGC         | 4 |
| wt-131550-131670 | 2520 | CTCGCCGAGTACATTCTTGTGCATGGCTTAAATGGCATTTTCATACACATGAGTCCAGTACCAGCATCGGTTACAGGACTACAATGGTCCAGTCCCAAGACAGCCCTCAAAATGATTC        | 4 |
| wt-131670-131790 | 2521 | AGCATAGTAGTCTTCCACACACAGGGGCACTTCCAAAAATAGGGAACAGGCGAGGTTGATTA CTGGTACATGATTTGTTAGGTTGGTCAAAATGGAACCCCGCATGCTCTCTCCCT         | 4 |
| wt-131790-131910 | 2522 | TGAGCCTTGGCCTGGCGGGTGTCTTGGGCATCATCCAGATT CAGAACAATTCATCACACTCCCACTTAGCCGCTTCACTGGGCGAGCATGCTGGATAACTTACTAAACTCGCGCCCATGG     | 4 |
| wt-131910-132030 | 2523 | CGCGCCAGGTGTTGGAAGAGACCGAAGGCTTACCCTTGGCCACTTCTTTGTTTAAAGCCGGAATGAGAAGAGGGGCTCGGGAATTAGACTCTCAGACTCAGACTCAGACTCAGATTG         | 4 |
| wt-132030-132150 | 2524 | TCATCGAGCCCAAGGCCGCGCAGGCCCTCTCAAAGCCCTTCTGTTACATGAAGTCCGGCTCGTGGAGTCCGCACCTCCTTCTGTGCACGAATTTTTCGGAACCCAGGAGAGGGGTCT         | 4 |
| wt-132150-132270 | 2525 | GGCGTCTGCTGGGGCCACTCCCGCTACGGGGCTTCGGGGTAGGGGCGTAGGCTTTTGGTGTGGGGTCTGGTGGTGGCTCCCTGGGCAGGGTAAAGGGGCGACGATGTGTGC               | 8 |
| wt-132270-132390 | 2526 | CGGCTACCCGGAGAGTTCCAGATTAGATGTACAGGCGAGCCTGGGTCGGGACCGCACCTCTCCACAGACAGTCCGGTGGAGCCATCAAGGGGGGCGAGTGGGTGGGCACCTGGTAG          | 8 |
| wt-132390-132510 | 2527 | AGGCCCTGCTCATCTTCTCACCTGCCCTGAGTCACTACCGGTTGGGGTAAAGACTGAGGGGGCAAGTCACTCAATCTCAGCGTAAAAGTTTTCGTGTCTTTCGTTTTCAGGGGACTCA        | 4 |
| wt-132510-132630 | 2528 | TCCTCGTGACATTTTCGCAGCCGCGGGCGGGCTCTTCTTCTGAAATCCAGCCATGGATCCACCCCGGGTCTGTGTGCCCTCTCCACACAGCAGCTGGCAAAATTTACAGT                | 4 |
| wt-132630-132750 | 2529 | CTTCCCGCGGCTAGAAAGCGCGCAGTAGAAGCGAGCGCACCTTCCCTTACTCCAAGCTGCTCTCTCTTAAAGAGCTGGGAGCAACTGGCTCTTTTTTCTCTGCCCCGGGACCCACG          | 4 |
| wt-132750-132870 | 2530 | TTTACAGACTTTAGACTATTTTTCGAAGTCAACCTGGGTGGGAGAAATCGCAGATTGCGTTGTGGTAGCTCTGCAGCCTTATCCCGGTGTTATATTGAGAATTTAAGACGGCCATGAGC       | 4 |
| wt-132870-132990 | 2531 | AACAGGGCAACCCGCAAGCGTACTCGAAAGGCACAGAGGCTAGAGGGCACCGCCAGTGTGTGACTGTGCCAATTTCTTGCACGCTCTGCCCCCGTGTGGGCAGTCAGGGC                | 4 |
| wt-132990-133110 | 2532 | CTGGAAGTCTTGGCGGCGTGGTATTTAAAACACAGCGATCCCTGAGAAGCCTCCAGGTAGAGTTTCCAGCCCTGGGGCAAAAGACCTCCCACTCCACACCCGGCCTGCTAAACCTC          | 4 |
| wt-133110-133230 | 2533 | CTCTCCGCTGGCAGGATGGCGCTCTCCGGGACGCTTGTATAGACCCGCGGAGCTGCCAGGGACACAGGCCCCGAACTCATGTGGGCCCAAGCCTTCGAACTCACTGGCGGTGC             | 8 |
| wt-133230-133350 | 2534 | CCCCGAAGCGCTCGAGCTGGCAGAGCGGGAGGGCCGAAAGGGCCAGGTCCGAGCGGTGGGACAGGTGTGCCAGGTGCTCAAAAATAGGCTGCTCCCGGTGGAGCTGGAGGATCATGCGG       | 8 |
| wt-133350-133470 | 2535 | TGACCACCTGGCCAGGGCGGAGGAGATCCGCCAGGACCTGGATGCTGTAGTGGCTTCTCTGATGGCCTGGAGAGCATGCAGGTCCAGTCCCGCTCCACGGGAGGGGCGCTCTGCGCCAGC      | 8 |
| wt-133470-133590 | 2536 | CCCGCCTCCCATCCCAAGCCAGCGGTTCACTCGGCTCACCGGAACGCCAGTATGCAGTCTCAATCTCTCCACGGACCCCTCTGATGGTGGCCGGCAGCCTGGCTCAAAGCT               | 8 |
| wt-133590-133710 | 2537 | GCTTGGTAATCTGTACGGGAACATCAACAGTGGTACCCTGCTTTCGACCCCTGGTACAGGACCATGTCCGGCTAATGCCATGCAGCGGCGCGTGTCCCTAAGCAGCTGAGGGGCAACCT       | 4 |
| wt-133710-133830 | 2538 | GAACCTTACCAACTCCGCTCTCCCTAAAGCTGATGACAGAAGTGGTGGCGGTGCTTGGGGCACCCACAGGACTTTTCTCAGACGTACGGACCTGCCAGACCTCCAGGCTGCCCTGAT         | 4 |
| wt-133830-133950 | 2539 | CCTCTCGGTGGCTACCTGCTACTCCAGGGGGGCTCTCACACCAAGCAGCGGCCCTCCCTGCTCAGCGGAAGAGCTGCTGGAGCTGGGCCCGGAGAGCCTAGAGAAAATCATCGCCGA         | 8 |
| wt-133950-134070 | 2540 | CCTCAAGGCCAAGTCAACCGCGGAAATTTTATGATTTTAAACAGCGAAACAAGGAAGCGCCAGTCAATAGCCCTCTCAACCAGCAGGGGCATATCCACCCGGCACATTGCGGGA            | 4 |
| wt-134070-134190 | 2541 | CAATAAGATTTACAACCTGTTTGGGAGCGGGACTACTGCCACGACGGCGCGCTGAACGTGCCCGGGGCGGGGTCGGGACCGGGACCTGGTGTACCGGATCGCCAACAGATCTT             | 4 |
| wt-134190-134310 | 2542 | CACCGCGCTCTACACCTATCGTCCCTGCTCCCCAGGCAATGCAGCGCGCAAGCCTGCCATGGCGTACAGTGGTATGCCGGGCGCCTATCCAGTCCAGACGCTTTTCCGCCACGGGGA         | 8 |
| wt-134310-134430 | 2543 | GCTCTCCGCTTCACTGGGCCACTACGTGAGGGCCACGGTGGCGGACAGCCCCAGGCTCCATCAGCTCTTTTTCCCGGGGCTGGTTTGTCTGGCCCTGGAGCTGAAGTTGATGGA            | 4 |
| wt-134430-134550 | 2544 | TGGGACGGCTCCCTCCATTATGCCATAAACTGACCGGACAAAAGTTTACACCCCTTTGAGATTTCAACCAAGAGCTTTTATTTTACAGCCCGCTGCCATGCTGGCGGCGGCAC             | 4 |
| wt-134550-134670 | 2545 | ACAGCTGCGTCTAGCCTTCGAGGACGGCGTGGTGTGCCCTGGGGCGCCCTCGCCATGCTTCCGGCGCGGGAGATCCTGGAGCGTCACTTCTCAGCTCGGATGACTACGACCGGCT           | 8 |
| wt-134670-134790 | 2546 | GTACTTCTGACGCTGGGCTACCTGGCTCCCGGTTGGCCCCAAGCTGAGCCAGTCTCTCGACTGGAGTGGTTCATTGGCAAAAAGGTAATAAACTCATCGACGGGGTTTTGGCTC            | 4 |
| wt-134790-134910 | 2547 | GTTAGGGAGGACACTGCCAAGGTTGAAGAGCAGATTTCCGTGAGCCAGGGTACCTGGCTCAGGTCGGGCGCCCTGCGCAGTCCAAGCTGCGCCACACACATGCACAGACGGCCCTGT         | 4 |
| wt-135270-135390 | 2551 | GACATCAGGCGGTCATGCAAAAACAGACAAAAGAGACCGTTCAGCGGTTACCGGGCGCAGGGCTCTGCCGGGAAGCCACCCCGGGCCAGGCGCCGTTAAAGCAGGTACCAAGTATTCATC      | 4 |
| wt-135390-135510 | 2552 | GGCACCTTGGCGGCAACACAGATTGTCGGGTTTTCAGGATTTTACCGGCTCCCGCCAGTGAACCTTAGGTCAGCAGCTTGGTCAGGGATAGGTCGAAAACCT                        | 4 |
| wt-135510-135630 | 2553 | GAGCTGCTCTGCGCAGAGCGAAAGCGCCAGTCTTTAGCATCTTACAGGAGGAGCCCGTGAATCCAGGTTGCTATTCGCGCTCATCCCGCGCACCCCAAGTCCCATTAACATAGC            | 4 |
| wt-135630-135750 | 2554 | GGGCACAATGGTGCAGGCACCGTCTGTATACGCTCTGGGCTTCTGGAGCGCCGGACGCCCAACCAAGGACGCGCTGCCTTCACTGGATCCCTCACCGTCAAGAGCCAGCTCCCTCT          | 8 |
| wt-135750-135870 | 2555 | GAAGAAGCCCTTGCACACTCACGGTGAACACCTGCCGGATGCTCCGGTGGCTCAGTCTTTGGCCTTTACAGAGCCGAGCGGGTCTTTAGCGCAGCCTGATTACCTCTGGGACTT            | 4 |

|                  |      |                                                                                                                             |    |
|------------------|------|-----------------------------------------------------------------------------------------------------------------------------|----|
| wt-135870-135990 | 2556 | CCTGTCCCTGTGGACTCAATTTACCACGATTGGGATATTGCACAGAGTACAGCGCTGCCCTCCCTCGAGAACCACAAAGGTGGAGGCTCTGCACGCTGGTCCCTCACTGTACTGGC        | 4  |
| wt-135990-136110 | 2557 | CTCCCTCCACCAGACATACCCCAAAACCACCGCAGATGGAGGCAAGCTGTCTCTTTGACCAGTGTCTATCTGTGCCCTGGGTCGTGGCGCGGCACCACGGCAGTCTACGGTACAGA        | 4  |
| wt-136110-136230 | 2558 | CCTTGGTGGGCTCTGAAGCACTTTAGTGACCTGGAACCGTCTATCGCCGCCAGATTGAGAATGACGCCAATGCCGAAAGCGTGAATCCGGATGCCGGAAGACCACCTCTGCCCT          | 4  |
| wt-136230-136350 | 2559 | CACGAAGCTCATAGCTAAGGCAATCGATGCTGGATTCTGAGAAACCGCGTGGAGACTCTGAGGCAGGACAGGGGTGTGGCCAATATCCAGCCGAGTCTGATTTAAAGGCCAGCGACCG      | 4  |
| wt-136350-136470 | 2560 | CCCGGACCTACAAAGCCGGACAAGGCACCTTCAGAGCCACCACCGGCTCCACAGACCACGCCACCTGCTATCAGGTAACGCAGGAGAAGGACAACAGCCTGCGGAGGTTCCGGCCG        | 4  |
| wt-136470-136590 | 2561 | CGCGGGCCAGGACCTCATCAGCTGCCCGCAACCTTTATGACACTGCTTCAGACCACTGGACAACAACCGCCGAGGCAGCACCCTGCTACCCGCGCCCGCTGCCCTT                  | 8  |
| wt-136590-136710 | 2562 | TTCCACCAGGCAATAGCCACCGCCCTCTACGGTCTTACGGTCTGGGGCCGGAGCGGTCGCCCGCGCGCTACTTTAGCTCCCAAGGAGTTACTACGCCGGCCCGCGGGGACCC            | 8  |
| wt-136710-136830 | 2563 | GGGTGCCTTCTGGCGATGGACGCTCACACCTACCACCCCAACCCACACCCCTCCGGCTACTTTGGCTTCCCGGGCTCTTTGGCCCTCCACCCGTCCTCTTACTACGGATC              | 8  |
| wt-137070-137190 | 2566 | CTACACCCACTCGGGGCTTACGGATTTCAGCCTCATCAAAGCTACGAAGTGCCAGATAGTCCCTCATCCGCCCCACCACCAACTTCTACACAGGCAGCTCAGGCGCAGCCTCCACC        | 4  |
| wt-137190-137310 | 2567 | CCCGGCCACACAGGCCCCGAAGCCACTGTGTGGCCGAGTCCACGATCCCTGAGGCGGGAGCAGCCGGAACTCTGGACCCCGGGAGGACCAACCTCAGCAGCCACCACCGAGGG           | 8  |
| wt-137310-137430 | 2568 | CCACCACCGGGAAGAACTGGTCAGCGCTCGCTCCGGAGCTCAGTCTAAGGAGCCACCACCCCAAGGCCAAGTCTGTGCAGCCACCTCAAGTCCATCTTTTGCAGGA                  | 4  |
| wt-137430-137550 | 2569 | ATTGCTGAATAAACCGCGTGGCTTGAAGTAACTTTATTGCGTGTAGTACTGCTTCAACAGTCCATTCACAGGGGTATCCAGCCCTTGCGCCCGCTCCCCAGCCCGCCAGCCACCCGACAGGGA | 4  |
| wt-137550-137670 | 2570 | ATGATAATGATGAGGAGCACCAGCCACCACAGCAAGTATTAGGAGCAGGGCCAGTGCACCCAGTGGTCTTAGGGCGCCAGGGATCGATTGAAAAGGGCCAGGGTCACTGGC             | 4  |
| wt-137670-137790 | 2571 | TTATGCGTGGGACGTTTAGAAGCAGCCGCTATGGGGCTGTGACTGGTGTCTTGGTGTGGGAGACTAATGTGGTGGGGCTATGGTAGTGGCTGGGATAACAGTAAGATGCATACGC         | 4  |
| wt-137790-137910 | 2572 | TGAGTGAGGGTCCGGTGGCATTGGTATTGGTGTCTTCCCTGCAGAGTAATTGCAAGTGGACCCCGGAGGCCACACTGCAATTTCTCAGTGTACATTGCACGTGTAGTAACCTGCA         | 4  |
| wt-137910-138030 | 2573 | TGCGCAAGGGTACATTTGGGATTATCAGAGAGCAGGAGGTGGTGGAGTCAATTTACCCTTCTAGGGTAAGGCTATAATTGTAACCCCGTTAGTTATAGTTCGGTGTGGAAAGTA          | 4  |
| wt-138030-138150 | 2574 | GCTACGGCCAAAGGGCAGTTGCCATCCCGGGAGTGTATCCCGGCCCAACTCGATCCGAGAGACCACACTATTGCTAGGAACGCTGCAGGTGAGATTCACTAGCACCTGCATGGCGC        | 4  |
| wt-138150-138270 | 2575 | GTGACATTTTCAAATTAACAGATCTGAGAAAAATGCACAACAGACCCACACAGCAGCACAATAGAAGCACTAAATGAGTATTCTAAACTGTCAGTTTAAAACTCCCTGCTTCT           | 4  |
| wt-138270-138390 | 2576 | CAGGCCTAAATATGTGGTGGGGTGTGCTTAGGATCACTTTTCAATTTCTGCAACAACAGCCATACCCGGAAGAGGAGCTGCCGGTGGCCATTTTCAAGCTGCTAAACCAGAGTGGCAGC     | 4  |
| wt-138390-138510 | 2577 | AGGCCTAAGAAGCTCCTCAGCAACATGGAGACTCGAAGGGAACCTGGCAGGAGCAGGGAGTACGATAGGCACCTAGCCTCTTATGTGAGGTAAAGAGATCGTAAAAAATGGGATCAGGGT    | 4  |
| wt-138510-138630 | 2578 | ATGTAACCCGAGTTTTCGGGGGATGGTGGCCAGCAGCGCGGGTGGGGGAAGGAGCTGACACGATTGAGTAAAGGGCCAAAAATACACCAGCTATAAGGAATTTGCTCAGGCCAAAG        | 4  |
| wt-138630-138750 | 2579 | TTGTCTCAGGTGGCTTACGGCTAATGTAGGCAATTCGCTGGCCAGTGTGTAATGTCCCTTTCCTGCTTATGCAAAATTTACCTCCCGCGCTGGTGGCAAAAT                      | 4  |
| wt-138750-138870 | 2580 | TCTGCCTCAGAATACTAACAGCTAATCCAAGTAACTTCTATCAGTAAACGGGCAGAAAACTGATAAGACCAGGAGTTTGGCCCTCCCGGTGTCCGGTGGTCTCACAGTGCCT            | 4  |
| wt-138870-138990 | 2581 | CCCCCGGGCCGATGGCTGAGGCCCGAATATGCAAGTGCATCTTTAACCAGTAGGGCCCTCACCTAGTGTCTTTGTAATCTTTAGTGGAACTAGTGGAGTGTGTGCTCGGG              | 4  |
| wt-138990-139110 | 2582 | TACCCCTATCCTATAGTCTACCGGAGCTCCTTGTCTTATGATAATCCCTGTAACAACACACCACCTAAGAACAAGGCATTGTTAACCTTTGGTGAACCTAGTGTAGTGTGTGCTGTA       | 4  |
| wt-139110-139230 | 2583 | AATAAGTGTCCAGCGCACCACTAGTCCACAGGTGTACCCGGAGGCTACTTGCCTCAGTGCCACTTTTACCTTCTCAAATCTATACGGGGGGGGGGGGCTGTAAACATTTGGTGGGAC       | 4  |
| wt-139230-139350 | 2584 | CTGATGCTGTGGTGTGCTGTAATAAGTCCGCTAGCACATCAGCTAGGCACAGGTGTACACAGGGCTACTTGCCTGGCATCTCTCACCGGAGAAGGGTTAACAACCCGTTGGGGGG         | 4  |
| wt-139350-139470 | 2585 | TCTTAGTGAAGTGCAGTGTGCTGTAATACAGGTCATAGCACCTATCCACTATGTCTGCCCGGGCTATATGTGCGCTTACCTCCCTATATAGTACAGCCCAACCGAACCGCAT            | 4  |
| wt-139470-139590 | 2586 | GATGTAGAATAAAATTTATGCATCATCTTAATCTGTGCCGCTTGGAGGGAACATGACCACCTGAAGTCTGTTAACAGGTCAGTGGTGTGTTTCTTCTGATAGAGACACAAGGACT         | 4  |
| wt-139590-139710 | 2587 | GCCAGCCCATTTGGGAGGGGGGGTGGGTACGGGAGAGTTTGGGCTCGTTTAAACAAGTCTCATCTGATGCTCTGTGGCACCTCAAGGTGAATATAGTGCCTCATCGATATCGCTGG        | 4  |
| wt-139710-139830 | 2588 | AAACCCGGTGGGCGCTGTTACCTAAAGTGCAGCAAGGTCTGTACGCCACAGGGTCCGTTTACCAGGCTTTCAGTGTGGAATTTAGATAGAGTGGGTGTGTGCTTGTTTAATTACA         | 4  |
| wt-139830-139950 | 2589 | CCAAGTACACCACCTCTATCCATATCCACAATTTGATAAACTCCGCATGTCCAACCACCAGTGAACAGGATGTGCACCCCTAAGAGGACCGCAGGCATACAAGTTATACCCAGTC         | 4  |
| wt-139950-140070 | 2590 | CTTGTATGCCTGGTGCCTTAGTGGGACGACGGCCTAGGTAGCATCAATTAACATAAAAGCAGTACCTTGTGGTACTTTAAGGTTGGTCCAATCCATAGGCTTTTTTGTGAAAC           | 4  |
| wt-140070-140190 | 2591 | CCGGGATCGGACTAGCCTTAGAGTAACTCAAGGCCAAGCATTTCACACCTGCAAAATGCACCATGTAACCACAGATCTAAACTGAAAGTTGCAGCTTTAGATGGCAAGGAACTTGGGTT     | 4  |
| wt-140190-140310 | 2592 | TCAGGCATAGAAGCCTGGCTCACTATAGCAGCCATGTTTGTCCAGGGTGGGGGAAAGGCACGTGCCCTAGAAAACCTAGCTGCAAAAATTTCTATTGTGGGAGAGCCTCTATAT          | 4  |
| wt-140310-140430 | 2593 | CTAAAGCCCTTCTCACAATACAAAATGTTACTAACGCTGCCCTCGGAGACCTGCTATGTGGCTAGACGATAGGCCTACCCAAGACGTTGGGGGTCTCGGGTAGGCCATGATCTTCC        | 4  |
| wt-140430-140550 | 2594 | AGGCATAGGTTACAACCACTGCTATCAAGCCTACTCAGTCCCAACGACGACATACCCCGCCCTCCTGCCATGAGGACTTATGGCAGTGTACTGTGCTTACTCTT                    | 4  |
| wt-140550-140670 | 2595 | GGACCAGGCTGCTATTCTATCAGAATAACAGGGGAAGCAAGGCCCTCTGTTACGCGGGACACGTTTCTAGAATCTCGGAGCCAATAACTACCTGCCCTCTAATCTGTATGCTGCAT        | 4  |
| wt-140670-140790 | 2596 | GAAAACCCACATACACGTGATGTAAGTTAGCCAGTTTATTGTTACACCAATGCCCGAAAGTCTCCCTTGTCCCTTGGGTCTCAGGACCCAGCCCTGGAGCTCGGGGGCGCCGGGT         | 4  |
| wt-140790-140910 | 2597 | GGCCACCAGGTCGCTGGTCCGCTGCCCGCTCCGGCGGGGGTGGCCGGCTGCAGCCGGTCCGGGTTCCGGCCCTGGAGCTCGGGGGCGCCGGGTGGCCACCAGGGTCCGCTG             | 12 |
| wt-140910-141030 | 2598 | GGTCCGCTGCCCGCTCCGGCGGGGGTGGCCGGCTGCAGCCGGTCCGGGTTCCGGCCCTGGAAGCTCGGGGGCGCCGGGTGGCCACCAGGGTCCGCTGGGTCCGCTGCCCGCTCC          | 12 |
| wt-141030-141150 | 2599 | GGCGGGGGTGGCCGGCTGCAGCCGGTCCGGGGTCCGGCCCTGGAGCTCGGGGGCGCCGGGTGGCCACCAGGGTCCGCTGGTCCGCTGCCCGCTCCGGCGGGGGTGGCCGGCT            | 12 |
| wt-141150-141270 | 2600 | GCAGCCGGTCCGGGGTCCGGCCCTGGAGCTCGGGGGCGCCGGGTGGCCACCAGGGTCCGCTGGGTCCGCTGCCCGCTCCGGCGGGGGTGGCCGGCTGCAGCCGGTCCGGGT             | 12 |
| wt-141270-141390 | 2601 | CCGGCCCTGGAGCTCGGGGGCGCCGGGTGGCCACCAGGGTCCGCTGGTCCGCTGCCCGCTCCGGCGGGGGTGGCCGGCTGCAGCCGGTCCGGGGTCCGGCCCTGGAGCTCGGG           | 12 |
| wt-141390-141510 | 2602 | GGCGGGGGTGGCCACCAGGGTCCGCTGGTCCGCTGCCCGCTCCGGCGGGGGTGGCCGGCTGCAGCCGGTCCGGGTTCCGGCCCTGGAGCTCGGGGGCGCCGGGTGGCCCA              | 12 |
| wt-141510-141630 | 2603 | CCGGTCCGCTGGTCCGCTGCCCGCTCCGGCGGGGGTGGCCGGCTGCAGCCGGTCCGGGTTCCGGCCCTGGAGCTCGGGGGCGCCGGGTGGCCACCAGGGTCCGCTGGTCCG             | 12 |
| wt-141630-141750 | 2604 | CTGCCCGCTCCGGCGGGGGTGGCCGGTGCAGCCGGTCCGGGGTCCGGCCCTGGAGCTCGGGGGCGCCGGGTGGCCACCAGGGTCCGCTGGTCCGCTGCCCGCTCCGGCGGG             | 12 |
| wt-141750-141870 | 2605 | GGGTGCCGCTGCAGCCGGTCCGGGGTCCGGCCCTGGAGCTCGGGGGCGCCGGGTGGCCACCAGGGTCCGCTGGTCCGCTGCCCGCTCCGGCGGGGGTGGCCGGCTGCAGCC             | 12 |
| wt-141870-141990 | 2606 | GGGTCCGGGGTCCGGCCCTGGAGCTCGGGGGCGCCGGGTGGCCACCAGGGTCCGCTGGTCCGCTGCCCGCTCCGGCGGGGGTGGCCGGCTGCAGCCGGTCCGGGGTCCGGCC            | 12 |
| wt-141990-142110 | 2607 | CTGGAGCTCGGGGGCGCCGGTGGCCACCAGGGTCCGCTGGTCCGCTGCCCGCTCCGGCGGGGGTGGCCGGCTGCAGCCGGTCCGGGGTCCGGCCCTGGAGCTCGGGGGCGG             | 12 |
| wt-142110-142230 | 2608 | CCGGGTGGCCACCAGGGTCCGCTGGTCCGCTGCCCGCTCCGGCGGGGGTGGCCGGCTGCAGCCGGTCCGGGGTCCGGCCCTGGAGCTCGGGGGCGCCGGGTGGCCACCAGGGT           | 12 |

|                  |      |                                                                                                                        |    |
|------------------|------|------------------------------------------------------------------------------------------------------------------------|----|
| wt-142230-142350 | 2609 | CCGCTGGGTCGCTGCCCGCTCCGGCGGGGGTGGCCGGCTGCAGCCGGTCCGGGTTCCGGCCCTGGAGCTCGGGGGCGGCCGGTGGCCACCGGGTCCGCTGGTCCGCTGCC         | 12 |
| wt-142350-142470 | 2610 | CGCTCCGGCGGGGGTGGCCGGCTGCAGCCGGTCCGGGTTCCGGCCCTGGAGCTCGGGGGCGGCCGGTGGCCACCGGGTCCGCTGGTCCGCTGCCCGCTCCGGCGGGGGTGG        | 12 |
| wt-142470-142590 | 2611 | CCGGTGCAGCCGGTCCGGGGTCCGGCCCTGGAGCTCGGGGGCGGCCGGTGGCCACCGGGTCCGCTGGTCCGCTGCCCGCTCCGGCGGGGGTGGCCGGTGCAGCCGGTCC          | 12 |
| wt-142590-142710 | 2612 | GGGGTCCGGCCCTGGAGCTCGGGGGCGGCCGGTGGCCACCGGGTCCGCTGGTCCGCTGCCCGCTCCGGCGGGGGTGGCCGGTGCAGCCGGTCCGGGGTCCGGCCCTGGAG         | 12 |
| wt-142710-142830 | 2613 | CTCGGGGGCGGCCGGTGGCCACCGGGTCCGCTGGTCCGCTGCCCGCTCCGGCGGGGGTGGCCGGTGCAGCCGGTCCGGGGTCCGGCCCTGGAGCTCGGGGGCGGCCGGT          | 12 |
| wt-142830-142950 | 2614 | GGCCACCGGTCCGCTGGTCCGCTGCCCGCTCCGGCGGGGGTGGCCGGTGCAGCCGGTCCGGGGTCCGGCCCTGGAGCTCGGGGGCGGCCGGTGGCCACCGGGTCCGCTG          | 12 |
| wt-142950-143070 | 2615 | GGTCCGCTGCCCGCTCCGGCGGGGGTGGCCGGCTGCAGCCGGTCCGGGGTCCGGCCCTGGAGCTCGGGGGCGGCCGGTGGCCACCGGGTCCGCTGGTCCGCTGCCCGCTCC        | 12 |
| wt-143070-143190 | 2616 | GGCGGGGGTGGCCGGCTGCAGCCGGTCCGGGGTCCGGCCCTGGAGCTCGGGGGCGGCCGGTGGCCACCGGGTCCGCTGGTCCGCTGCCCGCTCCGGCGGGGGTGGCCGGCT        | 12 |
| wt-143190-143310 | 2617 | GCAGCCGGTCCGGGGTCCGGCCCTGGAGCTCGGGGGCGGCCGGTGGCCACCGGGTCCGCTGGTCCGCTGCCCGCTCCGGCGGGATGGGGGTGCGCTCCAGCCGGACCGCTG        | 12 |
| wt-143310-143430 | 2618 | GTGCCAGGAGGACCCCGCCACCCGCTTTCATGGGGGGAGGGCCCGCAAGGACGCCGGGGGGTGGAGGTGTGCACCCCCGAGCGTCTGGACGACCTGGCAGCCGGGCCA           | 12 |
| wt-143430-143550 | 2619 | GCTCGCTTCTTTATCCTCTTTGGGCTCTGTGCAATACCTAAGTGTTCAGGAGTGGGGGGTCTCATTTGGTAAATTCAGGTGTGTATTTAGCCGTTGGGTACATTA              | 4  |
| wt-143550-143670 | 2620 | AGGTGTGAACCAAGGTGGGTGGTGGTGGGTCACCTTTGGGATAACAGAGGAGGAGGGGCTAGAGGCCCGCGAGATTTGGGGTAGCCGACCGCTCAGGAGGGTCCCGCCATAGG      | 4  |
| wt-143670-143790 | 2621 | GTTGAACCAAGGAGGGGAGGATCGGGTCCGCCCGATACCTAGTGGGTGGAGCTAGAGGTAGGTATCCATAGGGTCCATTATCCTGGAGGTATCCTAAGCTCCGCCCTATATAC      | 4  |
| wt-143790-143910 | 2622 | CAGGTGGGTGGAGCTAGTAGGATTCAGTAGTTCCTACTGGGGTACCCCGCTACCTACCTAAGGTGCCCGCCCTCTCCTTCCGTTTTAATGTAGAATAACCTATAGGTATT         | 4  |
| wt-143910-144030 | 2623 | AACCTAGTGGTGAATAGGGTATTGCAGCTGGTATATACCTATAGGTATATAGAACCCTAGAGGAAAGGAAACCTATAGTGAATCCCTCCCGCCCTACCCCGCCCTCCCTACGGTTG   | 4  |
| wt-144030-144150 | 2624 | CCTGAGCCATCCCCACCCAGCACCAGGGGTGACGTGGCACCCCGCTGCTTACTGACTGTGCACCTTTGCACATTTGGTCAAGTGCACCGATGCTCGCCACTTCTGGGTCAATGAC    | 4  |
| wt-144150-144270 | 2625 | CTGGCCTGTGCCCTTGCCCATGGACAATGTCCCTCCAGCGTGGTGGCTGCCCTTGGGATGCATCACTTGGAGCCCTAAGCCCGGTTGCTCGCCTGGCTGCACCATGACACACTA     | 4  |
| wt-144270-144390 | 2626 | AGCCCGTCTAATCCATGAGCCCGCTTTAGGAAGCACCACGTCCGGGGACGGAAGCTGGATTTGGCCAGTCTCAATTTGGGAGTGGTTTTGTGTGAGCCGGAAGTGGCAATG        | 4  |
| wt-144390-144510 | 2627 | GGGTGAGGTGGCGCTGGTAAAGCTGACGACCTCCCAAGTCTCTCACCTGGGTACACAGTGGGGCGGACGCTCTAAGTGGTGTGGCCTTATTCTCCCTTCCCTAGCCAGG          | 4  |
| wt-144510-144630 | 2628 | GCCATGTCTCCTGCATGTCTACTTGCCTCTGTGGTGGCAGACTGGCCCTGGGCCAACCCCGCTTGGGAGCCTGTAGGGGCAACACCCCTGGTTTTGTTGTCTCCTGTTTTGC       | 4  |
| wt-144630-144750 | 2629 | TGGCACTTACTGGCAGCCGAGCAGATTCTAATGGGCGCCCGCTTCTTCTCTTGTTTAATAGAAATCTAGCCAGGACCTATACCTGAGACTCAAAGTCTGGTCTGGGTTT          | 4  |
| wt-144750-144870 | 2630 | TGAGCCCCAAAGATTGTGATGACACCTGGTATGGTATGGTTTTCTATTCTTAGGTGTAATAAAAAATTCAAAAATGCATAAATTCCTTACCTGTTTTAG                    | 4  |
| wt-144870-144990 | 2631 | GGTATTGTCAATTTTCAGCCTGCCTATTTCAATTTGCCTAAGGTGGCAATTTAAGATGTGGTTAATAAACATTTTCTGCTGACACCACTGCATGGCAACCGGGTCCATGGCA       | 4  |
| wt-144990-145110 | 2632 | CATTTAGAGATAAATAGATGCTTGTCTTGCTCATGTGCAGAGGAGGGGGTGTGGTGTGCAATATAGTTTCTGGATTCCAATTTAGTTGGGGGTGCTATTTCACTATGGAATTA      | 4  |
| wt-145110-145230 | 2633 | ATTACTGACATTAGACAGTGACACCAGGGCTATATGTGGGATGTCTGTGGCCTTGCTCATTTCCTCTAGAAGGTAATCCCGCATTAACCTCCCTTTAAATTTGATGCAAGCCCTGGG  | 4  |
| wt-145230-145350 | 2634 | TTATTTATAGAATGATTATCTAGGTTGATGCTGAAAGGCTGGGCAGAGAAATGTTGTAATTTTATCACTTCTTTACCCCGCAGGATCCAGTTCTAGAAGATCTCCTGATATC       | 4  |
| wt-145350-145470 | 2635 | CCGGGTGCCATTATCCCTTAGTGTATAGCTTCTCTTAACTAAGCAAGGCTCCAGGATTTAGCTTTTTGGTGGGCTGGTTGTCAGGAAGAGGTTCCAGTGTGTCTTTAT           | 4  |
| wt-145470-145590 | 2636 | TTTTAGATGTTAGCTTTGTAGGTAGTATGGCTGGTATTCCTAGTGAAGGCAACTAACACAGTTAGACGTCTAGTTGTGCCACTGGTTGTTATCCGGTCCCAAATGTCACCA        | 4  |
| wt-145590-145710 | 2637 | CAGAACACAGGGGCTGGATTGGCAGCAGCACTTGTGCTTTTGTGATTTTACCCTGTATCAGAGTGGGGATGCTAGCCAAATTTAGCTTCCCTCCCTTAACAGGGGTCTCGCG       | 4  |
| wt-145710-145830 | 2638 | GGTGCCAAATGTCCGCTCCCTCCCGCTCCCTTGTAACTTATAGCATGATAGGTAGGTACCTAACGTGGAAGCCTGGTGGGTGATCCTTCTCGTAGGGAGCGCTTAGGGCT         | 4  |
| wt-145830-145950 | 2639 | GTTGAGCTCAACAGCCCACTGGGTAAATGTATGTTCTAAAGAGTTACCCAAATTAACAAAACCTGTTGTAGGGTAACGAAGACCTGATGGAAGTGGTATTGTTGCCGTTGAAAGACG  | 4  |
| wt-145950-146070 | 2640 | GGTGTCTGGCTCAAGTTCGCACCTCCTATACAGTGTAAAGCCTGTATCGGAAGTTGGGCTCGTCCAGTACTGATGATAATGTCGACTGCTGCAAGAGGTTGGACCGTCTTCCA      | 4  |
| wt-146070-146190 | 2641 | GTAGGTGTTGGGGTCCCAAATCAGAGGTTAGGCAAGTGCACCTGGCTCTTAGGAGGGACCCTAAGCCAGACAATGATGCCCCTTTTTTTTGCAAAATGGCCTTATTAATTAATT     | 4  |
| wt-146190-146310 | 2642 | CTTGTTAACTAATCTGTTCTATGACCCTGTGTTTTTCAGATGCCGTTGAACGTGTCACTGAGCTGAATTTGGACGCACTACTTACCTTTGCCCGCTGCCTCCAGCGTGATAAG      | 4  |
| wt-146310-146430 | 2643 | TGCTCGCTCCACTTTGTGTACAGGTGGCCAAACCTCCAGAATATCAATTTGGTGGGCCCTTGGTGGGCTGCATAAGGCAGTAGTTTGGGAGCTACTTGGACCATGTGGATCCAGT    | 4  |
| wt-146430-146550 | 2644 | GTCTGATCCTGGACCTTGACTATGAAAACAAATTTAAAAAAATGCATCATAGTCCAGTGTCCAGGGACAGTGCACCTCGGAAGTCTCATCTCCGTTTTGTTGTTAGTTGGCCAGTA   | 4  |
| wt-146550-146670 | 2645 | CGGCCACCCCTGTCACGCCCTGGCATGCTGTGCATCTGGCCGCAATTTACGCGGCCCTTTCCCGCTTGTACCACCATAGCAAGAGGGTAGGTTACATGGGTATTTCCCAT         | 4  |
| wt-146670-146790 | 2646 | CAGCACCTGACTGGCCGGTGAATTAGAGGAGAGGGCAACACGCAAGGCTGTTGTTTTAATTTGGGTTACAAGAGCTGCGGCGGTGCATGGGTTCACTGATTACGGTTTTCTAGATTGA | 4  |
| wt-146790-146910 | 2647 | CAGATGAAGTGAAGTGTCAACATCTATGGGGTGCAGAGTGTGCTTACCAGACTCCATGGAAGATGTGAATTTGCTGCTAGCTATATGGGTTGCTATGGGCTCCCTAGGGACTC      | 4  |
| wt-146910-147030 | 2648 | ATGTAGTGGGGCTTTGTGATAGCTAATGAATGTGGCAGCTGTGTTGTTGACTGGACCCTGAATTTGGAACAGTAACCTGGATTCTGTAACTTTCATGGTCCCGTAGTGAACTATGC   | 4  |
| wt-147030-147150 | 2649 | TGAATATCTTGAATATGGGAGGAGGGGGCTTTGGGTTCCATTTGTTGCCCTTTCTGGCCAACTGAGGGTCCAGTGTATAGGGCGTGGCAGTTTTCTGAGGGCTAATAACCCGGG     | 4  |
| wt-147150-147270 | 2650 | TGAGGCGGTTGTACAGGTGTAGACCTGGAGTTGAACCACTGACTGCGGTGCAAAAGTCAATGGTCTAGTAGTTGTGACCTGCAAGGCTACGTTGGGGATGAGCAGCCAGGACTTG    | 4  |
| wt-147270-147390 | 2651 | TTTGCAAGCAGACAGCGCGCATTTGAAACCCAGAGGAGTCCCGGGCCACCTCTTTGGTTCTGTACATATTTGTTATGATACAACCATGGAGTTGGCTGTGGTGCATCCAT         | 4  |
| wt-147390-147510 | 2652 | CTGGTAAGGGGCTGTTGCGGACGCTGTTTATAGCTATGCCAATTTTACCTGCCTGGGTTACTATTTCAAACAGACACACCTTTGAGGACACTGGAGCCCTGATCATTCTCGGCT     | 4  |
| wt-147510-147630 | 2653 | TTTACTGCCACCTGGCTTCTGTTGGGTGAGAGTGGTGGCGCTAGTTGTGCTTAGCAGAACGCACACCAGGCTGACTGCTTAGCAGTGTGGCCCTTTATTGTCATCCTAAGG        | 4  |
| wt-147630-147750 | 2654 | AGGGATCTGGAGTCCCTTTCGCGTGAAGCATGCCCTGAGAGCTACTCGAGTATAGGACTTAATCGCTCCTGTCGCGCTGGATGAGGGAGCGCAATTTGTACATCTAGCTCTGGCCATA | 4  |
| wt-147750-147870 | 2655 | GAGTTAGCCACCTTGTGTCTCCTTTGGCCCTTGGCCGTGCCAATTTCCGGTGGTTCCTTTTCCGCGGTTTATCCAATAGCATGTAAGAGAGTTGCCTAGATTTGGCAACTTTGA     | 4  |
| wt-147870-147990 | 2656 | GGGAAGCTCCCGTGTAGCTGGTACCTAACCCGCCCATCACACCCGACAGACTTGAACCTGTCTGTGGTTGGTGTGGTTTTGGGGTACGAGGAGTACGTTGGAACTCCTTTG        | 4  |
| wt-147990-148110 | 2657 | GAGCCAGAGGGATGGGCCGCTTGTGCGCTTATGTTACACGGTGCACAAACCGCGGCGGCTGCCCGTACCCTGGCCCTGAGCCGTTGGCCCTTACCTTCTGGCCATCGGGAGCCCTGGT | 8  |
| wt-148110-148230 | 2658 | CTAGGGTCCCTTGTGTTGCTTCTGCCATAGGGGGAAAGCATGCCTTACAGATTTGGTGTCTCCGTTGGAACATTTGAGGCTACTGTATCCGTGCTGACAACTTCCCGCAACA       | 4  |
| wt-148230-148350 | 2659 | TGACATGGGTTAATTTAAACATGTTTTGTTGCTTGGGAATGCTCTTAGGCCTGGAAGCTTGTCAATGGATTATCGTTTCTGAACACTACAGCGTAGGGCTATTGTAGCAGGCATGT   | 4  |

|                  |      |                                                                                                                        |   |
|------------------|------|------------------------------------------------------------------------------------------------------------------------|---|
| wt-148350-148470 | 2660 | CTTCATTCCTGCGTACCGAATGGCATGAAGGCACAGCCTGTACCATTGGCACCTTTTTCCATGTAACCTCCGTGATCCTGGGTCTTTGGAGACTCAAGTGTGAATTTGTTTGGTG    | 4 |
| wt-148470-148590 | 2661 | TTCCGGCCAGGGTATCTCGACGTTGGAATGTCAACTCAACTTGGGCACCTCGATAACCGGCTCGTGCTCGTACAGACGATTGTTGGCTCTGTAACCTGCCAGGACGGCTGACGATG   | 4 |
| wt-148590-148710 | 2662 | TGTTTAGTCTGCCACTTGCATCCGGCGCTTTGGTTACTCGGGAGACTAATGGGGGTGTGGTATGCCACAGGCTGGGGTGAAGTCTGGGATGTCCCTGGCGTTGCTGCAGCCCATTCG  | 4 |
| wt-148710-148830 | 2663 | CCCTCTGGGGATGAGATGTTACAGGGTGGCCGTACCCCTACGCTGCCGATTACATAATATAAAATGTAATGCTGCAGTAGTAGGGATCTGCACGCGCCAGCTGCTACTCTTCGGAAAC | 4 |
| wt-148830-148950 | 2664 | GCCAAACCAGGAGCGTGCCTCTGGCCCCATACTCCCGCCATGCGACTGCTCGCCCTCCAGGCTCCTGGTGAGCCCTTCCCGCTCCCGCATTCCTGCTTTCCGGCCCTCCGG        | 8 |
| wt-148950-149070 | 2665 | ATCCCGATGCACAGCAGGCTTTCTTCCCGGTAATGAAAAGAAATGACAGTGAGGTTGTACAGAAAGACAGCTTTAATCAGTTTACAGAGTGCCCTCGGAGGCTACGATATCCCGTT   | 4 |
| wt-149070-149190 | 2666 | AAATGTCTTGTGATTCTCTCAAAATGGGGGTGGGCTGCCGACAGCCTTCCACAACAATGTTCCCTGGCAGCTGAGCGGACAGCCCTGCCGTTGGATGATCTCTCATGATGCTGATAGA | 4 |
| wt-149190-149310 | 2667 | GGGGTCTCCGGCTAGATGAAAAGGCCTGGCCATGCTCTGGCCGTCACGATCGTTATGGGGTGTGGAAATGTTCCGGACCTGAGCTTGGGGTCTGGCCCGCTTCCACTCTG         | 4 |
| wt-149310-149430 | 2668 | TGGGTAGACGTAGAAGACCGGGTGGAGGAGTGGGACACGACAAACGGCGTAATCTTGGAGCTCAGGGGGGCTCGTAGGTTGTTGATTCCAGCTCCGTGATGAAATAGGAGGAAT     | 4 |
| wt-149430-149550 | 2669 | AATCACAGGGGAGCCAAAGTAGCGGATGCTGTGGATTCCCGTCCACAGCGCCAGTGGCTCTTAGGGTAGGGTGTAAACGGAAAGCAATACATCATCAATAGGGTATGCCAC        | 4 |
| wt-149550-149670 | 2670 | CTTGACGTTACGGGGCCCTCTGTTTCAGTCCGGCGTGTCCACGGAGACTCGGACTAGCCCTTACCGCGGCTATGGCTTTACCGACACACTTCCCGGGAATGTGTAATACG         | 4 |
| wt-149670-149790 | 2671 | GGCGTATGACTTTAGAAATGGGGGTGGGCTGCCGACAGCCTGTAAGGCAGCACTCGTCTGGCTGGTACGGGACAGCCACTGAGGAAGATCTGGGCTCGCTGGTGTGATGATAGA     | 4 |
| wt-149790-149910 | 2672 | CCCGCTCTGGGTGACGAGCGTGTGAGTGAATGTCGCTCTGCCCGGCAGAACTGACAGTGTAGGTTAGGGTCTTGTACCAATCTGATGGGCACAATGTACCAGTAAACTTCCCTTT    | 4 |
| wt-149910-150030 | 2673 | CTCTATGAACAGGCTGCCGGATTACGACGCTTACGACGATGCTCTGGTACAGTGCATAACGAAGAAGGGCTTGGAGTAACCTCGTTGTCTTCCGCTCCAAAGAACAAAAACGGCAG   | 4 |
| wt-150030-150150 | 2674 | CGTAAAGTAGCGGCTGCCGTAGGTGGTCTGTTGAGAGGAAAGAAAGTAACTGAAAGCTGAGTATCTGGCCACCAGGGGGAGGGAGGAGCTTGGCACTGCGCGTCCAGCTGCAA      | 4 |
| wt-150150-150270 | 2675 | TACCTGCTTGTGGTGACGCGGACGATGAGGGGAAATCTGTAATCTCCACACGCCTCTCATGAACGACGTGTCTGGTTTTTTCAGTGGCCCGCAGGCGGGGAGGCTGTTCTGAACGA   | 4 |
| wt-150270-150390 | 2676 | CGAGCGCCGGACGCTAGTGTGCATGGGCTCCTCCGGGTAAAGCTTCGGCCATGGCCGAGCTCGTGCACGGCAAGGTGAGAGTCCGGGGGGGGCCAGCGTCCGGCCCAATACAAAC    | 8 |
| wt-150390-150510 | 2677 | TCTCCGCTCGTTAGCTGGTAGAATATCCGCCCGCGTCTAGGTTGTAACCTCGCTCGCCCGGCAGAAAGAGCGCAAGTCCAAGTCTGGTCTGGGGCCGATGTGCAGCGGTTTGTGCCCG | 4 |
| wt-150510-150630 | 2678 | CAGTTGTAGACTGTCAATTTTATGGCGAGTGGCGGTCCACACGCGCGGGCCGACACCCATTGGTGCACGCGGCTCCTGGAATGTAACCCCGAGAGAGGGGCTGCCGCTCGG        | 4 |
| wt-150630-150750 | 2679 | AGATGGCCCTGTGCCATACATGATTTCTCCTCTGGGTGGAACAACGGCGTCTGTCTCCGGTGGAGGGGAATAGCTCCAGGCATCTTTCAGGGTACAGAGACCGGGTCCATGCTC     | 4 |
| wt-150750-150870 | 2680 | AGAGAACAGCCCTCCCGGGCGGTGGCGCGCCGGGCTCCAGCAGAAGCTCGCAGACCCAGCCCTCCTCGGCCCTGTCCACTGTATGTCAGGTGCACGGACCCGGAGGCTGCGTCTCGT  | 8 |
| wt-150870-150990 | 2681 | GACATGGCCAGGCTGGTGCAGCCGACGCTCCCGGTGCCAGCGAGGCGCGCCGAGCTGACTCAGGGCCACATCCCTCGGCCCGGGCCAGCGGCTCGCCA                     | 4 |
| wt-150990-151110 | 2682 | GCCCCGGGCTTTCATGGGCCGCTTCTACCTCTCTCCGGACCCACGCTGGTGCAGCGCAGAGGAAGCATGACCTTGGGGTGGGACGGGCGAGGCTGATCCTGGGCGCAATCTTTG     | 8 |
| wt-151110-151230 | 2683 | CCGATCCCCACACTTCACTCCTGTTAGTGTGATAGAATGTCGGTACCAGCCACGGGGGGGGCCGCATAGGGAAAGCCAGGGAGAGCGATGTGGCGAGGATGGGCTCAGCGG        | 4 |
| wt-151230-151350 | 2684 | CCCCAGACACGCAATTTGCCCCCTGGCGCGCCGACGCTGCCCTCGCGGCCGTCGCCAGCTCCGTACAGGGGGCCGATAGGAGGGGTATATCTAGGATAGCCGACCTACACAA       | 8 |
| wt-151350-151470 | 2685 | ATGAGACACAGACAGGTCGTGAGGATTTAGGCAACGACGAGCTTGTCTTATAGTTACAACACTGGGAGCGTGCACCTGGAAGATGCAGCTGGGGTAGATCTTACATCTTACAGGGC   | 4 |
| wt-151470-151590 | 2686 | GCAGCGCCCGCAGACACTGAAGGCGAGGTTACGCGCGGCACCTCCAGAGGGAGCCACAGCCCTGACTGGCCAGGCGAGGCTCGTAGGCCGAGACGGGCGAGCCGGAGCTTG        | 8 |
| wt-151590-151710 | 2687 | TGGTACTGCTCCCGAGGTGGAGTGGGACACAGTTAGAGAACAATAGTCCCTATCTCCACCAGGCGAGCCTGTGTGAGTTTTCAGTTTGCAGGGCCATCTCCGACTCAGGTGG       | 4 |
| wt-151710-151830 | 2688 | ACTGGCTAGGCACCTTCTGAAGTATCTGGCGGTGACTGTACCTGGTCTTGGAGAGTCCATAAAATGGTGAAGCTCCAGCGGTATAGTATAATGAGCAACAGGGCCAAACAGGCGG    | 4 |
| wt-151830-151950 | 2689 | CGGGGCTGGGTAGTAGCGGGCAACGAGAGACTCTGTGCAATCAACCCAGGCTCCCGGCTCACCAGGAAGAGCAGCGGACAGGACAGCATAAACCAGGAGAGGCGCAATGAGTC      | 4 |
| wt-151950-152070 | 2690 | CGGTGAAGGTGACGTTGCATATCAGGCGCGGCTTCTCCGAATTTGTGCGCAAAAGTTCCAGATGATGATAACTGTGAGGAGGACGATCAGGACTGCCCGCAGTAGGATGACGCGG    | 4 |
| wt-152070-152190 | 2691 | CTTTCAGTCTTGGACGGCCGTGTGCATGCTTTGGTGGGGCTTCCCTGCACATGTTGGGGCTCTGTTGAGATTGGCTCGGGCCCATGGTAATGAGGAGGATGATAATCAGCAGGA     | 4 |
| wt-152190-152310 | 2692 | GTACCAGACAAAACAGCCCATCAGGTACAGGCACACATTTCTGTGGGAGGTTCTTGGCGTTCCGGCTGAACAATGCTAGGGTCTTCCAAAGCCATACCCAAGTGAAGTCCATACGG   | 4 |
| wt-152310-152430 | 2693 | AGCACATCAGGCCCAAGAACATCATGTTCTGGTCAAAGGCAGAGCCGGTAGACGAGAACTCTGAATCATTTTCCAGCACCCAGAGCAGGTTCTATGAGAAGAGCTATCAGCC       | 4 |
| wt-152430-152550 | 2694 | AGACATCCATTCCGTGAACCAATTTCTTACAAGATGATAAACAGATGCCAGCCAGTGTAGCAGAAATCAGCAGGACGAGCAGGCTGTGCATGCCGCTGAGGAAGGCGCTGTAGG     | 4 |
| wt-152550-152670 | 2695 | ATTTAGTGACGCACTTCCGTTGCATTGACGGAAAGTCATGTTGGCCACCAGGTCGCCAGGTGGACCCGGGGCCATGGTGGAGAGCATCTTGTGGTGCAGGCCAGACTGGTGGTG     | 4 |
| wt-152670-152790 | 2696 | TCTGCAGCAAAAGAGGAACTGGCCAGCGACTAGTATTTGCATGCCACCTCCTGCCTGGTGGACTCCAGACTATTTCTGCATTCCGCTTCCGTTGCCATTGTTGCAAGGAGCG       | 4 |
| wt-152790-152910 | 2697 | ATTTGGAGAAAATAAACTGTGAGTTTACAGATCCACGGGCCACGCTCCCTGGGGGCTTCATGATCCACCGCTTTCCCGATGATGATGACAACCGCGGCTGTCTGAAGCGGCTGACG   | 4 |
| wt-152910-153030 | 2698 | AAATCGTGTGAGATTCTGATGAGAGGCTTGGGGGGTCTTTGCCCTCAAGGCGAGGCTCCTTCTCCTAGGAATGCCAGCCCTGCAGTACTTCCGCTCCACTGGGATCTTGGCAGC     | 4 |
| wt-153030-153150 | 2699 | CTTCACTAGATTACGCGATCCCCGGTGGGAATCTTCCGACGCCCGCTCCTGCTATCCGCTCGTCCGCGGCTCCCATGCTAAGGGCCCTTCTTTCCCTTACTTGGGG             | 4 |
| wt-153150-153270 | 2700 | ATATTCCGAGTCTGCTCTCGCCGCTCTTCTCTCGTTAAACAGAGAGAATAGTAGTAGGGTCCAGTCTCAGGCCCTCACTTTGGGCTTAGAATGGTGGCCGGGCTGAAAAATCTG     | 4 |
| wt-153270-153390 | 2701 | GAGGACGGAGAGGGCGGCCCCGGAGTTGTTATCAAAGGACACTGGAGGATGTTGGCCGCTCCTTGGAGCAGCTTGTGAAATAATGATCCACGGCCAGGGAACCGCTGCCGCTCGG    | 4 |
| wt-153390-153510 | 2702 | GTAGGCCGGTCTCGGCCATCTCCGCTTCTTCCGCCCTTCACTCCCCCTTGGGCTCCACAAGAGACTGAGGATCGCGCTCGTGGATCTGGGCGAGTCTCCTGTTGGCTCGACGAA     | 4 |
| wt-153510-153630 | 2703 | CTTCTGGTAGACGGCCAGGTGAGGCATCTGGTGCTTGTAGGCTGAGAGCTTCCGGCTGAGCTCCGTTGAAAAGCAGAGCTCCCCATGGGACCTGCCTTACGGAGGCTGTGTA       | 4 |
| wt-153630-153750 | 2704 | GGCCTGTTTAGGATGTCAATGACGGGCAAAAGCCACAGGTAGCCCTTGTGTAATGACTCTTGAAGGGCCGGTGGAGAGGAGGCTGGCCGCTCCTTACCAGGCTCCGCCAG         | 4 |
| wt-153750-153870 | 2705 | CACCAGGTGCAGCACGCGCCGGCAGCGTGTCTGCACAACTGCAGGCCGCTTCCGGAGGAGCTCCACCCCTTCACTAGGGTCTTGGCTCCGTGAGCACCCCAATATCTTCTT        | 4 |
| wt-153870-153990 | 2706 | TGTAATCAGCATCAGGCAGGAGAAGTCTTCCGCCCTCCAGGAGTGGGGGCCACAACAGGCTCCGGTGGTGTGGCCGGCCAGGGCATCGGCAAGGCGAGGCTCGCTCTCGTA        | 4 |
| wt-153990-154110 | 2707 | AAACCCCGGCACTCGATAAACAGCGAGTCCGTGTCCCGTAGATGACTCGAAGCTGGCCCTGGGGTTCAGGAGGCGCCAGCGCTCCGGGAGGGGGCCAGGCTCGAGTGTCCGGG      | 8 |
| wt-154110-154230 | 2708 | GCTCAGGGCTCCACGAAAGGCTTGGCCCGCTCAACATCTGTGCGGCCCTGCAGCGTCAACCGTCTCGCGATGAGAGGCGAGGAAAGAGGCGGTTGGCCACCCCGTGAAGCGTAGAC   | 8 |
| wt-154230-154350 | 2709 | GGCGTTGCAGCTGCACTTGTGTCAGGCTGCTGCTTGTGCGAGGATGGTCTTTGGCGGGATCCTCGAGGCCGCCAGCAGCTTCTGATGGCCTTGGCTTGGCCAGCCAGGAGTCAA     | 4 |
| wt-154350-154470 | 2710 | CAGACTAGCCAAGAAGACTCGTGCACGTGCTTTTACAAGTGGTAGACGCCCGCTGAGCCTGAAGACTCATAGTCTTCCCGGGCGCAGGCGGGCTAGCCTGTGCTTCTCC          | 4 |

|                  |      |                                                                                                                            |    |
|------------------|------|----------------------------------------------------------------------------------------------------------------------------|----|
| wt-154470-154590 | 2711 | CGGCGTTATCATGTGTAAGAATAACAGAGATTATGACCTGAATGATGCTCGGGTAGAGGCTGGCAAAGTCCACCACCAGAACCAGGGGAGTTGTAGAATCCGGACAGGGGCTGGATGACGGT | 4  |
| wt-154590-154710 | 2712 | GGCCCCCTGGTAGCCGTCCCGGTGAGAGCCGAGGGCATGGGCAGGATAAAGTTTTCTTTTGGCGGCCCGCAGGAGGCAGGAGAACACGCGGATCTGCTGCCCATCGTCCAGCACCCG      | 8  |
| wt-154710-154830 | 2713 | CCTGCAGGGGATGTGAGCGATCTTGGCAATCTCTGCCACCTCCACGTGGATCACGAAATGGTTTAGCAGATCCATGACCAGGGCCGAGTCTCGACGCAGTACATGCCAGCCGCTGCG      | 4  |
| wt-154830-154950 | 2714 | CCCCTCGGGGCCCGCTGCAAAGAGGCCGAGGAATCTCCTGTAATGCACATCCTCCTTCTGGCCCCAGTAGGTGCGCTGGCTACTGTGTCCAGCTTGTAGTCTGAGAGGCTGAGCTTGTG    | 4  |
| wt-154950-155070 | 2715 | CCGGCACACGGCGTACATGTCGATGGGGATGAGGCCGGTATGCGGACCTTGGTGTGGCCCGCAAGAAGCCCTTGGCCGCATCATGGGGTGCCTGACCTCGCAGACGCCCCAGCCCT       | 8  |
| wt-155070-155190 | 2716 | AATTTTGGCCAGAGAGGCTGGTGTAGTGTAGATGTGCCTGGCTGTGCCAAGTGTAGGGCCAGTCAAAGTTGGCCACGTTGACCCGGTCAACAATCCACGCTGAGGCTCTGAT           | 4  |
| wt-155190-155310 | 2717 | GAGCTGGAAGAAGCCGTAGAGATCTCCAGCTCCGATGGGAACTCGTAGACCTAAACCCCTCATGTCTTCGACAGTGCAGGAGTGCAGGATGCGCCTATAGCGCCCGCCCTCCTC         | 4  |
| wt-155310-155430 | 2718 | CCCTGTGCACCAGAGGACGCGAGATATCTGCAGGATCAGGTGAGCCTCGTTGGTGGCCGTGGGGAAGCCCTCCTCCCCAGACACTCGATATCGAAGGCCAGGGCCTGGTAGGAGGGCCA    | 4  |
| wt-155430-155550 | 2719 | GGAGCTGTCTTACGCCGAGCCGAGAGGTGCCACCCTCACAGTCTACTCGAGCTCGGGTACGAGTCCCGGTGCTGAGGCGGGGGATGGCGCGGGCGGAGCTGTACCAGCCAAAGGT        | 8  |
| wt-155550-155670 | 2720 | GACAAAGTCATTGTCCAGGACAAAGCGCGCTGGCATCCACGTTGGCCTCAAAGATCCGACACCCGCTGTTGCTTGCAGCCACGTTGGCCACGTTGACACACTGTTGGGATGGGAGAG      | 4  |
| wt-155790-155910 | 2722 | GAGGACTGCAAACTCCACGTCACAGCCTGAGCGCGCTGGCGTAGAAGTAGGCTGCTGCCAAACACGTTACACACACGCTGGCCCCATCGCCCTTGGCCGGCCAGTAGCTTGTAT         | 4  |
| wt-155910-156030 | 2723 | GACGATGCCACATGGCACCACATACCCTGTTTATCCGATGGAATGACGGCGCAATTTCTGCTGCTGTACCCGCTCTGAGTATGTGTAAGTGCAGTGGAAAGTCCAGAGGGCTCCGCTGGGT  | 4  |
| wt-156030-156150 | 2724 | GTCTGCCTCCGGCCTTGGCGTCCCTCTTGGGCACGCTGGCGCCACCACATGCCCTTCCATCCTGTCACCCCCACCACCGTCAGGGAGTCTTGGTAGAAGCACAGGGGGGGCTGAGG       | 8  |
| wt-156150-156270 | 2725 | CCCCGCACATCCACCACCCCTGCGCGCCTGGTGTCTGGAACACTTGGGAATGAGACGCAGGTAATCCTTGTACAGGCTTTTCAGAAAGCCCTTATTAGTCTTAGAAAGGGTTATA        | 4  |
| wt-156270-156390 | 2726 | GAAGAGTCCCCAGACATGGTTAAACTCAGTCTCTGCCCTCCCAAGCAGTGCAGCGGGGCTCTGGATCGTGATAGCGTCTTCTGCGTAGGCCCTGGAACACGGTCCCTGGCTGCCCTGC     | 4  |
| wt-156390-156510 | 2727 | AATGCTCTGCTGGCCACTGAGGGTCCGGCCGCTCTGAGTGTCTCTTTTGGTCTCTGGTTTGGTCTATGCAGCGCTAACATGATGGCTTGAATTTCTGCTTACTAATGGGATTAATG       | 4  |
| wt-156510-156630 | 2728 | CCTGGACCCCTACCAGAGGCATGTTGCTGAGCGAGCTCGTGCATCCGGGGTAGAGCATCTGCCACCGGCTGCTGCGACATCTGGCGCGTCCGCTCTGAGGGAATAACCCAGATCAC       | 4  |
| wt-156630-156750 | 2729 | ACCCCGCCACCAGGACCAGAATGAGCATGCCCGCAAGGGTTTTGAAAGAGGAGATGAAACCAGAGACCAGGCTGCTAAACAAACCCCCACCCTGCTGACTAGGTTGGTATGGAC         | 4  |
| wt-156750-156870 | 2730 | TGACCACGCTACCAGACTGTCCATAAGTTCGCCAGCCGTCACGAAATGATTTCTCCGTTTGACACTGCATTGTCCAAATCCTTCCGAGCCGGCGATGTTTGGCCCTGGAAG            | 4  |
| wt-156870-156990 | 2731 | TTGTACTCCCGAAGATGCCCTCCAGGTCAAAGACGTTGGAGGCACGCTGTTCTGCCCTGAGTACAGCTCCAGGGAGGCAAAGTCAATGTTCTCGATGAGGGAGGTGTTTAGTGAATG      | 4  |
| wt-156990-157110 | 2732 | AAGGTCTGCAGGGTGGCAATGCCGTCCAGCTCGATGGTTTTAAAGTGGTGTAGTCTGTGTAGACGTGGATCTCGTTGCCGGACTGGAAGTAGTACTGGCTGGTGCCTGGCACACCTCC     | 4  |
| wt-157110-157230 | 2733 | GTATCTTTTTGTGAGGAAGATCTGCTGCGTCCAGCTGCTCCCTGAGGCTTGGTGTCTGATAAAGTGAAGGACACCAGGGGGCGGAGTAGCACATGGTCTCGGAGCCA                | 4  |
| wt-157230-157350 | 2734 | GGGACCCCTCATGCTCTTGCAGAGGGTACGGTGGCCTGGTTAACGGGCACGCACTGGGAGACTGAGATGACATCCCCAGGCGCTTGGCCGCCACCGCCTTACCGTAGATGTGGACATG     | 4  |
| wt-157350-157470 | 2735 | ACGGTGGTTGATTAATCTGGTTAGTCTCTCAGCACCATGTTCTGCCTCTTCTGCTCCAGGCACCAGGCCCGCAAGGCTCCAGCATCGGTTGATCTGGCGGCGCAGGGAGTCTG          | 4  |
| wt-157470-157590 | 2736 | TAGGCAAATGGATCTGAGCGGTGGCGGAGTTGTTGAGGGTCCCGAGGACTTCCCGGGGGCCGTGGGGGGACCAGGTGGTGGCGTTCCCGCATCCCGCCTCCAGCGCTCAGAACG         | 8  |
| wt-157590-157710 | 2737 | GCGCGGGGGTGTCCCGCGGGCCGCGGATGGGGCTGGGGCGATGGACTGCTGGGGGTGAGGAAGTCCGGATGGTAAAGTCCGTCAGGTTCTTACGGTGGCCAACAGGACCGGGGGTCC      | 8  |
| wt-157710-157830 | 2738 | AGAGGTAGCCAAGCTAATAACAATCTCCCGCTCGTTATAAAATATGTAATGGCTCTTGGCCCTCTGTGTAACGATCTGGACGGCTCGTACTTCTCATGCTGCTTGTTCACCTGC         | 4  |
| wt-157830-157950 | 2739 | TCTTCGATGCACTTGAAGGCGTCCGGAGCTCTATGCCACGGTGTGTGGTACAGGACTAGAGGTCCCTCGTCCGCGTGGTACAGGAGTCCGCGTACCAGCAATGTAGATGAGAATG        | 4  |
| wt-157950-158070 | 2740 | GAGTCAAAGTGGCCAGTGTGAAGCGGGCAGTAGGCTGTCTGTTCTGAGCTTCCAAGATAGCGTGAAGTGCCTTGTCCAGGAAGGCTCGCGGTTCCGCTTGGCGGTTGCTCCCT          | 4  |
| wt-158070-158190 | 2741 | CGGTTGTCGATGCTCCTACTTGTAGTTAGTTCTCAGCTGGAAGGAGTCTGCCCGCTCATGGAAGGTTTCTTATTTTCCCGTCATAGAAAGGGGACATTTCCACAGTCTGCCCGGTG       | 4  |
| wt-158190-158310 | 2742 | GTGGTCACAAAGAGTCAAGGGGGTGTGGACTTGGCCATCATGTACAGTTATCAGGCAGTTGACGGTAGTCTTGTGTTCTGTAAGTCCATATCAACCACCCGGGGCGTCATAGAGCTCC     | 4  |
| wt-158310-158430 | 2743 | GTCTGGCTGGCGTAGCGGCGCACCCCGTTGGCCAGGCCCGGGTGGGCTTTAGGTTGACGGTGTGTTAACTCCGTCGCGGTCTACATACACGCGGCTCAGCCCATCTTTGTGATCTTG      | 4  |
| wt-158430-158550 | 2744 | ACCGCGTTGTAGCACTGGTAGATGGTATCCATCTGCTGAGTTTTGTCAGCTGTCAACGGAGAATTTCTCCTCGTCCGCGTGGTACAGGAGTCCGCGTACCAGCAATGTAGATGAGAATG    | 4  |
| wt-158550-158670 | 2745 | TTGGTCACTATCTGGTGTAGGAGCGGACCTTAAACGAGTAGGGAATAATGTTGCTTTAAACACCATCAACAGGCCCTCCGTTGATTCTCCCGCTGCCAAACAGGGGACACTGGATG       | 4  |
| wt-158670-158790 | 2746 | TCCGAGGAGAAGCGGAACAGGTGCGCGTGGCTGGAGAGCTCGCAGACTCGGAAAGGAAAGTGGTTTGGTACGCGTGGCGGTAGGCTGCACCGTGGTGGCGGGGGTGGCGGCTGCTCT      | 8  |
| wt-158790-158910 | 2747 | GGGGTCTGCGCACCGAGACGGCAGCCAGGCGGCTAGCAGCACACCACGCTTAGCACCTACGCGGAGTCACTCTCATTTGGAGGTGCAAGTAGAGAAGGGCATATAGATCCTTAAA        | 4  |
| wt-158910-159030 | 2748 | TACCCACCCCTGCCCTTATACAGAAGAATAGGGGGCGGTGAGTGTGACGTGAGGTAAGCCCATCCGGGGCAGGGCCTGGCCGGGGTACCAGCTCCGCCCGGCGCAGGATCAA           | 8  |
| wt-159030-159150 | 2749 | GGACCGCCCCAGGTCTTGTGTAGAGGGACACGGTTAGGACGGCCTCGCGCAGCGCCCGGCACAGAATTTGCTGGTATGATGCCAGTACGAGCCCGGGTACGCTGTAGAAGCTGTTGAA     | 4  |
| wt-159150-159270 | 2750 | GGAGGTCTCTATCCAGTCGCTCGGCTCGATGCCTGGCCATATCAGGGAAGTCAAGGAATGCCTTCTGGTGGGGCAGCGTACCTGCGCGTACAGCAGCGAGCCAGGGCCACGTTGCTGGG    | 4  |
| wt-159270-159390 | 2751 | TGGGGGAAAGAGCCGCTCTCCTCCGCCAGGGGCCCGGTGATGAAGTGTACAGGCTGTGGTACGCGGTGCAAGTGTCCGAGCTCAGGGTCTGGGTAACAGGTGTGTTTTGATGTA         | 4  |
| wt-159390-159510 | 2752 | CTTGGAAATCTCAAAGCGGGACCCCTCGCCGCGCGCCTGTCTCCAGGGACCCGAGACGAAAGCCCGTCTGTAGAGAAAGTGGTGGCGATGCGGGCCAGCTCCAGTAGACCACGTC        | 8  |
| wt-159510-159630 | 2753 | CCCCAGACGCGCAGGACAGGGTCTCGGTGAGGCTCTGCTGTTGCGCCAGGCGAGCTGACGTTGGCCAGACCTCGGTGGCCACCTGGCCGAGGTAAGTCTGCTTGGCGTTGAG           | 8  |
| wt-159630-159750 | 2754 | CGCGTCCGAGAGGGCGCCGACGGCCGGCTCTGCTGCCAGCCGCGGGGACCTCCGGGCTCTCCGGGAGCGCCTCCTCGCTCGCCGACCCGCTCCCTCGCTGGCCCAACCGCTGCGTGGTTGAG | 12 |
| wt-159750-159870 | 2755 | CCGCGTGTACAGCTCGTCTCTTTTGCAGGATGGCCCGGTACTGGGGTGGCGCTGAAGGCGGGCGCGCAGTCCGCTTACAGCGCTCCACCAGCGTCCCGGAGGAGCTGTAGACCCC        | 8  |
| wt-159870-159990 | 2756 | GCCGAGAAGAGCCGCTCCGTGGCCCCGGAGCCACGGCTCAAACAGGTGAGTACGCTTGGCCCCGCGAGCGCTCCTCGCAGGCCCCCGCACCAGGGCCAGGCGACGCTCCCGGGC         | 12 |
| wt-159990-160110 | 2757 | AAACAGGCGAGAGAGCGGGAAATGGCCGCCACCCTCCCCCTGCCCGTGTGACCGATAGCATGGCCGCCAGAGTTCCAATAGAGGAGTCCGAGAGCTCCGCCACCTCCGGGGCACTGT      | 8  |
| wt-160110-160230 | 2758 | CGAGAAGACGTTGTAGGTGTCCAGCGCTCTGGTCCGCCCTCTGCTCCGGCCCGCCGGCCCGGGACCCGCGCTCCTCTGGCCCGCCCGGCTCCCTCTCTCAGCCTCCAAC              | 8  |
| wt-160230-160350 | 2759 | GTGCCAGGCCCGCCGCTGGCGACTTCACTTCAAACAGTCCCGAGCCGGCTCCGGATACCCGGACCGCCAGCTCCGGGCTCTCCGGGAGCGCCTCCTCGCTGGCCCAACCGCTGCGTGGTGG  | 8  |
| wt-160350-160470 | 2760 | GTGGTTGGGCAGAACCATCAGCTCGCCACACAGCCAGCAGGACAGGATGATGAGAGCGCGGGTCTGGATGGGACTTACGCCCGAAAGCGGCCCAAGCATCCAGGGGCCG              | 8  |
| wt-160470-160590 | 2761 | TTCCAGGCTCTCCAGCCCATGGTGTGAGACATGCAATAAAACACGCTATTGATCTCTTCAATAAATCTATGTCATTTATTAGGCACAACTTACATCGACTTTATGCCCCCGTA          | 4  |
| wt-160590-160710 | 2762 | AAACTCCACAGAGTACGCGACTGAGGGGTACGGAGAGGCGGGACCCGGTACCCTTCTACCAGGGCGAGCAGCGCGGAGAGGGCTCTCTGAGTCTCTAGCAGGTGCACCAGCTC          | 4  |



|                  |      |                                                                                                                          |   |
|------------------|------|--------------------------------------------------------------------------------------------------------------------------|---|
| wt-160710-160830 | 2763 | CAGGGACAGGGCGTGCATGCACGGTCACTCTGCCGCTCAAACGGGGAAGGAGGATGGCTCCAGCTCGGCCAGCAGGCCGGCGTTGGCCACCACCGCAGCCAGCTCCAGACTCCGGGG    | 8 |
| wt-160830-160950 | 2764 | GTCCAGCCGGGTGCACACGCTCAGCTCAACCGCCAGGGCGTACACCTGGCTGTACGCCGCCAGCAGCCCCGACATCGCCGCCAGGGTCTCTAGACCTCGAGTCCGGGGAGAACG       | 8 |
| wt-160950-161070 | 2765 | GTGGCCAGACGGCGCTTGCCTGTCGCCCGGAGCCCTGCCCTCTCCACCAGCAGCAGCCCGGCCAGGCCCTGCGACGGTGTGCTGACCCGCTCGGCCACGCTGATAAGTTGTCTGG      | 8 |
| wt-161070-161190 | 2766 | GCTGCCCGGGCCACCCACACTCCCTCCAGAAAGTCCCGAGCGGGCTCCGCCGTCACCTCTATCCCGCTGGAGGCAATGGTGCCAGGGTTCTAGGACGCTGTCCGCCAGGACGGAG      | 8 |
| wt-161190-161310 | 2767 | AAGCGGCCCAATAAGTACTCCGCGTCCCTAGTACAGCGAGGCGCATGCCCTGCCCATGGCATCCACAAGTTGCACACCACATCAAACACACAGTCTTCCCTCTGTTTTGTGATATA     | 4 |
| wt-161310-161430 | 2768 | ATGGCTCCAGGCCAGCCGTGATGTTCAATCTCATATGTGTGTCGGCTTGGTCCGGCTCCACGTTACCCCTAGGGTGGGGTGGCAAAGACAACCTCTCCGATGGAGAG              | 4 |
| wt-161430-161550 | 2769 | CCCCGGCCTGCTTGCAGCCAGCCCGGGGGTGGATGATGTAGTTCTCCCTCCCTGGTAGTCCAGCCCGCCGACATAAAGTATCCAGTTCCCGGCCGGAATACTCGTTGTGCCGTTGACCC  | 8 |
| wt-161550-161670 | 2770 | GTGTACTTGTGATGGTCACTGGCAGCGTGACAACCGGACGGCCCTTGCAGACCTGGTAAAGACAGTCTGTGGCCGCGCAGACCACCGTGGTGCAGTAAGGGAGGAGTGGCTCCGCG     | 4 |
| wt-161670-161790 | 2771 | TAGGCCGCTGCCGACTCCACCGCCCGCTGCCAGTACGTGGGGTAGTACAGGGCGGCCAGCGACTGGTCTCCGCCACAGTCCCTGAATCAGGCTGATGTAGAAGTGGGTCCGCG        | 8 |
| wt-161790-161910 | 2772 | CACGCTTTCAGGATGGCGTGTGAGCCTCTGCTTGGCGTAAGTACCAGGTTGCCAGGCACACATCTATGACCTTCTCTCTGTTGGCCCGGGAGCCCGTCCACAAGAGGGCC           | 4 |
| wt-161910-162030 | 2773 | AGGTACAGTACTCTCCGCGTGGCCCGCTGGGACAGGACCGAGCCCGCTGAAAAGTTGGTCCACAGTACAGGCTTGTAGAGCTTAGTGTCCGGGAATAGGGTCTTGTGTAG           | 4 |
| wt-162030-162150 | 2774 | GTGTTGAGGAATTCATGTAGGGCCCTGCGGCTCTTCTAGCTTCTCCCTCCCTGGTAGTGGACTTGAAGCTGTTCTGGAGGGCGGCATTCTCCCGCTGAAGACCACTGTTCTGATC      | 4 |
| wt-162150-162270 | 2775 | TTGATGTTCTGGGCGCAGCATCAGCACCTTGGACATGCGCACAGGCGCCCGGCCGTACACCGGCCCTGCAGGGCCGCTCCAGGCTGGCAGGTGCGAGGTGGCTCCCATGC           | 8 |
| wt-162270-162390 | 2776 | ACCACCTTGGCTCCTTGGCGGTGAGGACCCCTTGTGATGGCCAGGCTCCTAAAGTTGGTGCACAGGCTGTGGTAGTGACCTTTAGCCACTCTGGGGGGCTCTGGCCAGCCCGGG       | 4 |
| wt-162390-162510 | 2777 | TTGTCTTCTATAGCACATACAGATGGGCGAGGAGATGCTCTGCAGGATGGTGCAGAGTGCAGCGGTAACACACTGGGTGAAGATGGGGCAGGCGGGCTCGCAAGGGGTGCACAG       | 4 |
| wt-162510-162630 | 2778 | TACTGCATCAGTGGTAGCAGCTTGGACAGGCTTGTAGGTGATGTTGTTTGGCCATGCTGTTCAAACTGGACCACTTCGGCGTCCACCGCCGATCCACGCTCTTGAACATC           | 4 |
| wt-162630-162750 | 2779 | TTGACAAAGTACGCGGGCCATGGGGCTCTTCTAGCTTCTCCCTCCCTGGTAGTGGACTTGAAGCTGTTCTGGAGGGCGGCATTCTCCCGCTGAAGACCACTGTTCTGATC           | 4 |
| wt-162750-162870 | 2780 | TCGTCGGCGCGTCCCGCTGCTCTCTATCGATGAAGTTGAGAAAGTTGCCAAAAAGTCCGTTCTGTTGAGGAGCCGAGGCCCGGAGATCACATAGGGTCCCTCCGCTGCGTG          | 4 |
| wt-162870-162990 | 2781 | GACATGACGGGGGGAAGCGTCCCTCAGCCTAAAGAGAGCGTGTTCAGGCACAGCGCCGGGGCCCGCCCTCGCAGAGCGAGCACATGGACTGGCGGCCCGCCCGCACGTAGCTG        | 8 |
| wt-162990-163110 | 2782 | CCCGTCCCGGACCGGGGTGACAGAGCTCTTCTGCTCCCTGGCAAACTGCAGGTAGTAGGCATAGCGGGCAAGAAAGTTGGGCGAGAAAGAGGGCCGATAGACAGGCTCCACAGG       | 4 |
| wt-163110-163230 | 2783 | TAGTTTCCCGACCGTGGTTCGGTGCAGCTGGCCACCCAGCCGAGAAGCAGGGTCCGGCGCAGGGTCCAGGTCCTCCCTCTGACGGTCCCGAGCCGTTGGGTATGTAGAAA           | 8 |
| wt-163230-163350 | 2784 | CTGTTAAAGAGACTCCTTGGCCGTGACCGTTGACTTCGAGACCCCGGAGCAGTGCAGGAGCGAAATGGTGGCAAGATCTGCGTGGACAGTGGGGGGCCAGGCTGGCATTATCGG       | 4 |
| wt-163350-163470 | 2785 | TGTAACGACGACACACGGCCCTTGGACCTCACAGTCCGCAACAGGGGCCACGAGTCTGAGTTGAGGCTGGCCGGGTCTGTCGAGGCTCCAGCATGGCGGGTGCAGTCTACC          | 8 |
| wt-163470-163590 | 2786 | GCCAGCTCGCATGCCGCGTGTCCACAATCATAAGGCTCCGAGTCCGGGTGACTGATGTTGAGGCTGGAACTCCTTGGGGGGCCACCTTGGCCACCTTGGCTGGTCTGCAGG          | 4 |
| wt-163590-163710 | 2787 | CTCTGCTTCTCCAGCAGCTCCACAGCTTCCACCCGTCGACACCGCTCGGACGCGCAGCGCTCGCCAGCCCGGTGTACAGCGCTCGTGCATGCAGCGGTGAGTCCGAGTTGAAACTGGCGG | 8 |
| wt-163710-163830 | 2788 | AGCTGGGACAGCCCTCTGGGAACACTCCTTGTGCTAGAGCGGGACCTAACGCTCGCAGACTGCCCCACCGTACCTCTGTTTAAACGATGGAATGGCCACCAGGTTCCGCTGTAG       | 4 |
| wt-163830-163950 | 2789 | AGTCGCTCCTTGAAGCCCTCGTATTGACCACCGCCCGAGTAGGCAGAGGATAGCTAGCCCTTCCGGGAAGAAGTCCCGCCGCTGGAGCTTCCCTGGTAGGGCGCTGAGGCGTCCG      | 4 |
| wt-163950-164070 | 2790 | TACCAAAACACTCCCTGGTCTCGCCACAGAGGGCTCGAGACCCGGCCCTCAAAGATGGGGGAACCATATGGGCAATGTTGGAAACCGAGTATGTTCCCTGTGATAGGAGTACGGCGT    | 4 |
| wt-164070-164190 | 2791 | AGGAGCCCGCAGTTGGGGTGGGCTCCTGTGCAGAGCCTTGCATTGATGCTGAAGCCCGGCTCCACGGTGTGCGCAAAAGGAGCGGCACCGTCCAGCACCTGTGGCCCGGTAGCCG      | 8 |
| wt-164190-164310 | 2792 | GTCCCCAGTGTGGCCACCTCCCTAAGAGGGTAGGTGGCCAGGGGTAAAAGTAGATGAGCCGACGAGCCCGGCTGGCTGTGGCTGCCAGATTATCTCGTAGTCTGTGCACCCCTGC      | 4 |
| wt-164310-164430 | 2793 | ATGATGCCCAAGGTATCGCCCGGCTCCAGTCCACATTAATGTTACACTTTACTCATACGCAACACCCACTGTTTATTCATTTACAAAGATTTTCAGGAAGTCACTAGGCTGGCC       | 4 |
| wt-164430-164550 | 2794 | AGGGCCACGTCACGGGAAGTACGCTCAGCGATCTGGCATGCCGCCAGCTCGCAAAACAGAGTCTGCATAGAGGGCCAGGTAGTGGCGATTGCCCCAGCACGAAGCGCGG            | 8 |
| wt-164550-164670 | 2795 | CTCTTGTGGTACCCAGTAGTTTCCGACCCGAAACACCACTGTGTAGCACAGCACCCCTGAGCCGCGACCAAGTGTGATGTTGTTGACACTGCGCGCAGGACCTGATGATG           | 4 |
| wt-164670-164790 | 2796 | AGCCGTACGTGCGTGTCTTGGCCCGATGTGGCTGTCTGCAGGCCAGCTCCGCTACAGCTTCTATCCTTCTCAGGGAGGCCCTGATGAGCCGCGAGGACCAGGGCTGGCAAA          | 4 |
| wt-164790-164910 | 2797 | GGCAGTCTTCTCATCCGGGTGAACACCGGTACATGGCCCTGAACATGAGGTAGCTGACTAGCCACCTTGTGCTCCGGCGGCGAGGGCGGACCCAGCCCTCGACCGGGTCCCTC        | 8 |
| wt-164910-165030 | 2798 | ACAAACACAGAATCTGTAGACTTGGCTGGCCCTCATGCTCTGTCAGGCCAGCTCAGGGCTTACGGCTTATATGATAAAATGGGCGTGGCAAGATGATAAGACGCGAGGCTGGGTGA     | 4 |
| wt-165030-165150 | 2799 | GGAGAGTCCAGAGCAATGGCCAGGTTATCGCTCAGCTCCTCTGTTGGCTCCTGTGTGGCCCGCGCCAGGCTGTACCCGCTTCTTGGGTGAGCGAGTACCCTGACCTCCTACTGG       | 4 |
| wt-165150-165270 | 2800 | AGGAGGGTGAACCTCGGTCCAGAGATTGAGGTCAAGCTGGTTTTAAACTGGGCCAGGAGAGGAGCAGTGTCTATTGGGCGCATGCACCACGATGTCATCTTTATAGAGTGGCCCTTCAGG | 4 |
| wt-165270-165390 | 2801 | GGCTCTTTGATATCCACAGAAGTGCACACACTTCTTTTTAGTAGTACCCTGCCAACATCTCCATGACGGCAACTACCTGTGCCGATGAAACTGGGCGAGACCAGGTCACCAAG        | 4 |
| wt-165390-165510 | 2802 | CAGGAACACTGAGCGTGGTGAAGCCTTAAGCCTGTCTGTCCACTCGAAAGGCTCAGTTCAGACTTCTGTCTTACTGTGACATGCACCGTGAATGCATTTCCCATCCAC             | 4 |
| wt-165510-165630 | 2803 | GTCCAGTGGCTCATGCCCGAGGGCTGTGAGCCCGACCAACTGCGGCAAAATGGCGGTGTTATGAAGGAAAAGGATGGGAGCCTCTCTGTTGCTGTGACCTGTCACTTCCCAAGCCCTGG  | 4 |
| wt-165630-165750 | 2804 | CACCTGCCAGTACCTGCGTTGGGAAAATGACAAGGAGGAAGCCACGGGTTTATGTTTGGGATACTGTGCAATAAACGCACCTTGCCATTTTACCTTGTTTAGTGTGGCATTG         | 4 |
| wt-165750-165870 | 2805 | GGGGGTGGCATTGCGGGTGGATAGCCTCGCAGCTGTGGGAAAATGGGCGGAAGGGCACCGTGGGAAAATAGTTCCAGGTGACAGCAGCAGTGTGTGAAGATTGTACAGCTGCTGGTT    | 4 |
| wt-165870-165990 | 2806 | TGGAGAAAACGGGGTGGGCGGTGATCAGGGAGAACAATCCCGGGGACACCTGCACGAGACCCTGGGCTCTCAGGAACTCCGCCAGGCTTGGCAATGGGGTGTCTGTAGCCG          | 4 |
| wt-165990-166110 | 2807 | CGCGGTTTCAGCATCACAGTTATTTGCTGAAGCTTGTGGGGCTAAATCCCTCTCGCTTGTCTCAGAGAGCATTTCAGCCGGTTTTGCAGTCTGCTGACGATATGGGGTCT           | 4 |
| wt-166110-166230 | 2808 | CCTAGAAATGTTGCAATGGGCGGGGTCCTTAGCCCGCGGGGATCCGGATGGGTACGATGGCGGAAACAACCTCCCAATATCCATCTGCTTCTGGCTTCTTGGGAACACCCCCAC       | 4 |
| wt-166230-166350 | 2809 | CCCACCGAAGCATGAGGAACGTGAATCTAATGAAGAGCCCCACCCGCTTATGAGGACCAATATGGGGGATGGCGACCGTCACTCGGACTATCAACCCTAGGAACCCAAGATCAAA      | 4 |
| wt-166350-166470 | 2810 | TCTGTACTGGGATTGCAACACGACGAAGTTCAGGGCTCCTCCCTCCTACTCTCAGCGGATGACTCATCAACACATATACGAAGAAGCGGGCAGAGGAAGTAAAGTGGCA            | 4 |
| wt-166470-166590 | 2811 | TCTATCTGTACTTTATTTTATGATCACAAGTACACATCAATAAAGGGCGCCTTACGCGGATGTTATCCACACATCCCAATTCACATCTCAGGGACAACAGGTCAAAGTCTT          | 4 |
| wt-166590-166710 | 2812 | TGTTGACACCCACGCGTGGCTCCAGGGGTGGAAGCGTTGGATGCAGTCTCCGCATCGGGCGGACGCTCTCCCAACCGGTTTCTGCGGATCAGTCTGGTGGGATCGG               | 8 |
| wt-166710-166830 | 2813 | AGTCGGTGGGCGTCTCCACGGGACACGCTCTTCTTGGCCTGTTCTTTGACCTTTTGGACATTTCTTGAAGGAACGGCGGAGAGTAGCCTAGAAATCCAGCCAGTGGTCTACCCGG      | 4 |

|                  |      |                                                                                                                           |    |
|------------------|------|---------------------------------------------------------------------------------------------------------------------------|----|
| wt-166830-166950 | 2814 | TCGCATGGTGGCTTCTTAGATGAGGAGCAGGCATAAAAGTCCAACACAGACACAGAGTACCACCAGGAGTAGTCTTAGTCTGCTGACGCTCTGGTCTCGGGCCAGGGGTGGCTAGGCCT   | 4  |
| wt-166950-167070 | 2815 | GGTCTCCGTAGAAGAGCCGGCCAGCCGCAGGACAGAGGACTGCTGCTCTAGCAAAGCACGCTCCAGGACGTGACCATCTCGAGAGTGAGGCCACAGCTTTTTCTGGACTTTTTATACAG   | 4  |
| wt-167070-167190 | 2816 | TAAGGACAAGGAAAGAAAGGCCAGAGGAATGTGGAAGATGAGCGAGGACAGGTGTGGAGGTTTTGGGCTAGCTCTTAGTTTTCTGGTGTGAGAGAGGGATTAAGTGCTTATGCGCAAAG   | 4  |
| wt-167190-167310 | 2817 | AATGTGTCAACAACAGGTGTTCCCTGCCTCTGCTGGCATGAGTGTAGGTGGGCTTGGGCTGAATCCAAATGTGATTTGGCACAAAGATGGAAGCAAAGTGTCTGGAGTACTGGGGGGAG   | 4  |
| wt-167310-167430 | 2818 | ACAGGGATGTATGTTGGTCCCCCGTGGTATGCCAGTACCCTGTGGAAGTAAGGGGCTCATCTGCTGGTAGTTGTGTTGTGTCAGAGGTCTGATGTGTGAGGAGGGTGGGTCAACCGC     | 4  |
| wt-167430-167550 | 2819 | AGGGGGCTTGGTGGCGGAGTCTGGCAACGCCGGTCTGCTGCTGCTGTTAGGCGTGGTAAGCGTGGTAAGGTGTGTCCEAATTCGCGATGTCTCCTTTCCCTTGTGTTTTGAAT         | 4  |
| wt-167550-167670 | 2820 | AGAATATGAAATGGCTTTTCAGCCTTACAGAGCAGAGGTTGCTTAAAGGTGTTGAGGTAGTTAGCTAACGCAATGTCAGTAATGAGGAGGAGTCAAGTGGGAGGAGGCTA            | 4  |
| wt-167670-167790 | 2821 | TGACATGGTAATGCCTAGAAGTAAAGAAAGTGTAGTCATAGTAGTCTAGCTGAATGGGCGTGGGGTGTGCATCATCTCCACCAGCAACAGGAAGCAACCAAGCAGCGTAGGAAGGT      | 4  |
| wt-167790-167910 | 2822 | GTGGATCACCCGCCCATGGCCGAATCATGACTATGACCGCGCTCCGTCTGTCATCAAAGCCGGGCTGGTCACTCTTGTTTTTCAACCTCTCCGTCAATGTGAGGGGCCCTC           | 4  |
| wt-167910-168030 | 2823 | CATCATTTCCAGCAGAGTCGCTAGGGCTATGAGGCGAGCGGTTCATGTTGGCCATTGTCATCAGTGTGTGTCAGGGCTCTGGGCAATTGTCATCAGTGTGTGTCAGGGTCTGAGGCAGCG  | 4  |
| wt-168030-168150 | 2824 | GGTCATGTGGCCATTGTATCAGTGTGTGTCAGGGCTGCTGGGCAATTGTATCAGTGTGTGTCAGGGCTCTGGGCAATTGTCAGGACCACTCCAGGTGCGCCTAGTTTTGAGAGC        | 4  |
| wt-168150-168270 | 2825 | AGAGTGGGGTCCGTGCGCGGCTCCACTCACGACGAGGTGGTGTCTGCCCTCGTGGAGTTAGAGTCAGATTCATGGCCAGAATCATCCGTAGCTTGTGAGGGTCGGGAGGAGTTCAT      | 4  |
| wt-168270-168390 | 2826 | CGTGGTGGTTCATCACTGTGCTGTTGCCATGGTAATACATCCAGATTAATAAGTCCGAGAAACAGGAGGACGCAAAAGGAGATCAACCAATAGAGTCCACCAGTTTTGTTGTAGATAGA   | 4  |
| wt-168390-168510 | 2827 | GAGCAATAATGAGCAGGATGAGGTCTAGGAAGAGGCTAGGAAGAAGGCCAAAGCTGCCAGATGGTGGCACCAAGTGCAGAGCATCTCCAATAAGTAGATCCAGATACCTAAGACTG      | 4  |
| wt-168510-168630 | 2828 | CGTTGAAAAAGAGTGTAGGGTTGAAAAAGTGGGGTGTGGTAAATAATTCCTAGGGAAATGTTAGATCTTACCAAGTAAAGACCCGAAAGTAGAAGGACCAATCCAAGGAACAATGCC     | 4  |
| wt-168630-168750 | 2829 | TGTCCTGCCAATTCAGAGAGCGATGAGCAGGAGGGTACTGGGAAAGAGGAGAAAGTGCCTTAGAGAAGGAAAGTAAAGGGAAAGGGGTGTGGGGCAAAAGGGGTGAATACTTACTC      | 4  |
| wt-168750-168870 | 2830 | ATCAGTAGGATATACAAAGGGCTCAAAGTGGACAGAGAAGGCTCTCTGAAAGATAAAGATGATCAAATAATATAAGTAAAGCATGAGAGCAAAGGAAATAGAGGACAAAGAGGCTCCCT   | 4  |
| wt-168870-168990 | 2831 | CCAGTCCAGTCACTATAACGATGTACAGCCAAACAGTAGGCCAAGAGGAGGAGAAGGAGGAGCAAGGCTAGGGAAGAGGAGAGGGGGTCTCGAGGGGGCGTCGCGGGCCCGGT         | 4  |
| wt-168990-169110 | 2832 | GGCCCTCTCAAGGTCGTGTTCCATCTCAGGCGAGTGTGTGAGGAGCAAGGCAAGTTGAGGAAGAAAGGGGGCAGGACAGTGTGAGAGGCTTATGTAGGGCGGTACGTACAGTAACG      | 4  |
| wt-169110-169230 | 2833 | CGTGTTCCTGGGATGTAGGGCCGCGGGGATTGCGGGGTGTCGCGGAGCAGTACGGGTACAGATTCCCGAAAGCGGGCGGTGTGTGTGTCATGTAAGCGTAGAAAGGGGAAAGTAGAA     | 4  |
| wt-169230-169350 | 2834 | AGCGTGTGTTGTGTTAGAAAAAGCGGTCGCCGGGGCGCAAGCTGTGGAAATCGGTGGCCAAAGTGCACAGGAAATGGAAGGCGAGTGGGCAATCAGAAGGGGAGTGCCTAGTGTGG      | 4  |
| wt-169470-169590 | 2836 | CCGTATGGGAGCGGGTGGGCGGCTAGAGGGCTTAAAGGCTGAGGGGCTGACGAAAGCAGCAGGCGGATGAGGAGTGGCGGATTAGAGCGAAAAGGGGTGGGC                    | 4  |
| wt-169590-169710 | 2837 | TGTGCGAGTGTGATGAGGCAGCGCCGAAAGTCTGCTGGGCTGGGGGGCCCGCAATTCCTGAAAAAGTGGAGGGGGCGTGGCCTTCCCGCGGGCCCCAGCCCC                    | 8  |
| wt-169710-169830 | 2838 | CGCACAGAGCGCGCTACGCGGGCGGGCGGGGGTCTGGGGTCCGCGGCTCCGGGGTCTCGGGCGGTGGATGGCGGGACGTTCCGGGGATCGGGGGGTGGGGGGCGCCCGC             | 12 |
| wt-169830-169950 | 2839 | CGGGCCGACCCATGCTGACCGTGTGAGGGGGCAGGGTCGACGGGGTGTGTCTGGTGGGGGCGGGAGCGGGGGCGGGCGGGAGCTGCACGGCTTGAGGGGTAGAATGACAGGGG         | 8  |
| wt-169950-170070 | 2840 | GCGGGGACAGAGAGGGTCTGCAGCCCGGCGCCAGCAGCCAAAGGCGGGGAGCGGGCAATGGAGCGTGACGAAGGGCCCCAGGGGTGACCCCGCAAACGTGACCCCG                | 12 |
| wt-170070-170190 | 2841 | GGCTCGGGGTGACCCAGCAAGCTGACCAAGGGGCGCTGGTGTACACAGGCAACCTGACAAGGCCCGCCAGGAAAGACCCCGGGGGATCGGGGGTGGGCATGGGGGGCCG             | 8  |
| wt-170190-170310 | 2842 | CGCATTCCTGAAAAAGTGGAGGGGGCTGGCCTTCCCGCGGGCCCCAGCCCCGACAGCGCACAGAGCGGCGCTTCCGGGGATCGGGGGGCGGGGGTCCGGGGTCCCGGGTCCCGGGG      | 12 |
| wt-170310-170430 | 2843 | TGCGGGCGGTGGATGGCGCGGACGTTCCGGGGATCGGGGGGTCTGGGGGCGCCGCGGGCGGAGCCATGCGTGTAGCGTGATGAGGGGGCAGGGTTCGAGGGGGTGTGTCTGGTGGG      | 12 |
| wt-170430-170550 | 2844 | GCGGGAGCGGGGGCGGGCGGGAGCCTGCACGCCGTTGGAGGGTAGAATGACAGGGGGCGGGACAGAGAGCGGTGCGGCCCGGCGCGCCAGCAAGCCCCAAGGGGGGCGGGG           | 12 |
| wt-170550-170670 | 2845 | AGCGGCAATGGAGCGTGACGAAGGGCCCCAGGGTGAACCCCGGCAAACGTGACCCGGGCTCGGGGTGACCCAGCAAGCGTACCAAGGGGGCCCCGGTGGGTGACACAGGCAACCTGA     | 8  |
| wt-170670-170790 | 2846 | CAAAGGCCCGAGAAAGACCCCGTGGGCGATGGGGGCGCGCATTCCTGAAAAAGTGGAGGGGGCGTGGCCTTCCCGCGGGCCCCAGCCCGCGCACAGGCGCGCTAGC                | 8  |
| wt-170790-170910 | 2847 | GCGGGGGGCGGGGGGGTGGGGTCCGCGGGCTCCGGGGTCTGGGGGCTGCGGGCGGTGGATGGCGGGCGGAGTCCGGGGATCGGGGGGTCGGGGGGCGGGGGCGGCCATGCGTGA        | 12 |
| wt-170910-171030 | 2848 | CCGTGATGAGGGGGCAGGGTCTGCAGGGGGTGTGTCTGGTGGGGGCGGGAGCGGGGGCGGGCGGGGAGCCTGCACGGCTTGGAGGGTAGAATGACAGGGGGCGGGGACAGAGGGCGGT    | 8  |
| wt-171030-171150 | 2849 | GCGGCCCGGGCGCGCCAGCCAAAGCCCCAGGGGGGGGAGCGGGCAATGGAGCGTGACGAAGGGGCCAGGGTACCCCGGCAAACGTGACCCGGGGTCCGGGGTACCAGC              | 12 |
| wt-171150-171270 | 2850 | CAAGCGTGACCAAGGGGGCGGTGGTGTGACACAGGCAACCTTACAAGAGCCCCAGGAAAGACCCCGGGGGGATCGGGGGTGGGCGATGGGGGGCGCGCATTCCTGAAAAAGT          | 8  |
| wt-171270-171390 | 2851 | GAGGGGGCGTGGCCTTCCCGCGGGCCCCAGCCCGGCGCACAGGCGGCTACGGCGGGGGCGGGGGGTCGGGGTCCCGGGTCCGGGGGTCGGGGGGTGGATGGCGG                  | 16 |
| wt-171390-171510 | 2852 | GCGACGTTCCGGGGATCGGGGGGTCGGGGGGCGGGCGGGGGCACAGCCATGCGTGAACCGTATGAGGGGGCAGGGTTCGAGGGGTCGAGGGGGTGTGTCTGTTGGGGGGCGGAGCGGGGGG | 12 |
| wt-171510-171630 | 2853 | CGGGAGCCTGCAGCCGTTGGAGGGTGAATGACAGGGGGCGGGGACAGAGAGGCGGTGCGGCCCGGCGCCAGCCAAAGCCCCAAGGGGGCGGGGAGCGGGCAATGGAGCGTGA          | 8  |
| wt-171630-171750 | 2854 | GAAAGGGCCCCAGGGTGAACCCGGCAAGCTGACCCGGGGTCCGGGGTGAACCAAGCGTGACCAAGGGGCCGTTGGGTGACACAGGCAACCTTACAAGGGCCCCAGGAAAG            | 8  |
| wt-171703-171823 | 2855 | GGCCCGTGGGTGACACAGGCAACCTTACAAGGGCCCCAGGAAAGACCCCGGGGGGATCGGGGGGGTGGTGGCGGGGGTGGGGGGTGGATTTCGCCCTTATTGCCCTGTTT            | 8  |
| wt-60-180        | 2856 | GAATCCAGTATGCCTGCCTGAATTTGTGCGCCCTACCTCTTTGGCTGGCGGCTATGCCGCTCGTGTTCACGGCTCAGTTAGTACCGTGTGACCGCACCCGGCTTGCCCTCTC          | 4  |
| wt-180-300       | 2857 | ACTTCTACTCTGGCAGCAGTGGCCAGCTCATATGCCGCTGCACAAGGAAACTGCTGACACCGGTGACAGTGTACTGCGGTTGTCACTGTGAGTAGACACAGCAACATTACAATGC       | 4  |
| wt-300-420       | 2858 | ATGATGTTGAGATTGATGCTGTCTAACAGTTCACCTCTGCTTTCTCCCTCAGTCTTGAATTTGCCAATACAGGAGTTGAGGACCCACCTTTAATCTTCTGTTTTGC                | 4  |
| wt-420-540       | 2859 | ATTGCTGGCCGACGTGGGCGACTACAAGCATTACGGTTAGTGTGCTCTGTATGAAATGACAGTTGACTTCATATGATGCCCTGGCATGACGTCAACTTACTTTTATTTAGT           | 4  |
| wt-540-660       | 2860 | TCTGGTGTGCTTGTCTCTGACTAGCAGTACAGAAAGGAGATGCGCGCTTTGACTGTTTGTGGCGGCATCATGTTTTGGCATGTGACTTTGCTCCTCATCTGCAGCGTGTTCG          | 4  |
| wt-660-780       | 2861 | GCTGAGTCCCCTCTGGAGCTGTAACTGTTGGTTTCCATGACGCTGCTGCTACTGGCTTTCCGCTCTCTCCAGGGGCGCTAGGTACTCTTGGTGCAGCCCTTTAATCATT             | 4  |
| wt-780-900       | 2862 | GGCAGAGGTAAGCCACACAGTGAACCTGCTGGCTTTTTGCCATGTTTCTTGACACAGTAACTGCTGACCACTGATGATTAGCTGCTGACCTGTAAGCTGACTGATTTTTG            | 4  |
| wt-900-1020      | 2863 | GCACACTAAGTCTGACTACAAGTCTTCTCTGACTGCTTGAAGTTTCCCTTCCCTTAACCTAATACTTGTCTTTTGAATCGCAGCTCAACTTGGCATGTTTT                     | 4  |
| wt-1020-1140     | 2864 | TACAGTGGTCTCTGATTGCTCTCTGCTCTTCTATGCTCACTGAGCAAGATCCTTCTGGCAGACTGTCTCTATGCTCTGGCCTCTTGGTGCAGCCTCCCGCTAATCGCTGG            | 4  |
| wt-1140-1260     | 2865 | TGGCAGTATTTGCAACAACCTCAAGAGTTTTAAGCAGCACTGAATTTATACCCAGTGTGATCTAATTTGACTCTCTTTAGTTGAAGAAAAACAGCTATTGATTGAACACACAT         | 4  |

|              |      |                                                                                                                          |   |
|--------------|------|--------------------------------------------------------------------------------------------------------------------------|---|
| wt-1260-1380 | 2866 | TTTACGCTTTGTTCTTAGATTGTCTGCATGTTATTACTGATTGTCGCTGGCATACTCTTCTTCTGTATCCTGACCGAATGGGGCAGTGAAATAGAACATACGGTCCAGTTTTT        | 4 |
| wt-1380-1500 | 2867 | ATGTGCCTCGGTGGCCGCTACCATGTTAGCCGGCGCTGTGTGGCTGACGGTGTCTAACACGCTTTTGTCTGCCTGGATTCTACAGCAGGATTCTCGATTTTCTCATTGGTAAG        | 4 |
| wt-1500-1620 | 2868 | TGTGACACCAACAGGTGTTCCTTGTATGTCACCGTCTGACACATGACTTACATGGGTTTGGCTTTTGTAGGCTTTGCCCTCTTTGGGGTCATTAGATGCTGCCGCTACTGCTGTAC     | 4 |
| wt-1620-1740 | 2869 | TACTGCCTTACACTGGAAGTGAGGAGCGCCACCGACCCATATCGAACACTGTATAAAGTAAAGTATTATAAATTTTAGAGACACTATCACGTGTAACCTGACGTGCAAGGATGGA      | 4 |
| wt-1740-1860 | 2870 | AGAGAGGGGCAGGGAAACGCAATGCCGTGGCCGGTATGGGGCCCGTTTATTATGGTAAGGCTCTTCGGGCAAGATGGAGAGGCAACATACAGGAGGAAAGGCTATAGAGCTACT       | 4 |
| wt-1860-1980 | 2871 | CTCTGACCCACGCTCCGCGTCGGCTGACCCGGCCCGCTGATTGCTGAGAACCCTGCTAGTGTGGCCTGCTGGCACCAACACGATCCAGGCTCAGCGTCAGGAGAGGGCCAG          | 8 |
| wt-1980-2100 | 2872 | AGAACTGGCCCTCGTTGGCATTACTAGGACGCCAGCCCGCCGCTGTAACACTTCGGTACGACGGAGATGCCCTGAGGCGCTCAGGCAACAACTATGTGTATGCCCTACGGACAGATGGAT | 4 |
| wt-2100-2220 | 2873 | GGCAAGGCCCTCCACATGGTCCGCGGAAATCCAGCAATTCCTGCGACTCCTGGGCGCCACGTACGTCTTCGCGTGGAGATGGGCAGGCAGTTTGGCTTCGAGGTGCATAGAAGCCGGCC  | 4 |
| wt-2220-2340 | 2874 | CTCCTTCGCTCAGTCCAGGCCATCAATCACCTTGTCTGTTTGTGACAACGCCCTTCGCAAGTACGATTCGGCCACAGTGGCGCGGGCTCCAGAGGGCCCTTCTGTTGGCCGGCCGAGA   | 4 |
| wt-2340-2460 | 2875 | GACCCTGACACGAGCGCCGACCTCCGCAAGCTGAATGAGTGGTGTGGTGGCAGGGCTGCTGGTGGCAGACAGCTGGCCGACGAGCTAAAGATCGTTCGCCGCTCGCAGACACTTA      | 4 |
| wt-2460-2580 | 2876 | CTCGGGCCACTTGGTCTTACGCCACGGAGACCTTGACACATGGAAGTGTGAGCAGGGACACAGCAACCCTCATAGTTTGGACACGATTCATTATGCCCGGGGACCATCCA           | 4 |
| wt-2580-2700 | 2877 | GGCCAACTGCCACAGCTGTTTATGAGACGCCAGCCCGCCGCTTTCCCTTGTAAATGCAATAGCATCATCGCTGGCTGGTACTACCAGACGCCACCCGCGCCGAGCAGATGC          | 4 |
| wt-2700-2820 | 2878 | CAGGGCGGCGCCCGGCCAACAGGCCCTTTCAGACCAGGGCGGGCTGAATGCCATGCCAAAAGCGGGTGGCGGCTGCTGGCCGGCTTTCAGAGACCATCAACGCCACGCTCAAGGG      | 8 |
| wt-2820-2940 | 2879 | AGGAGAGGGCTACAGCCCACTATGTTTAAAGGGGAGCTGGGGCCATCAAGCACCAGGCACTTGACACTGTGAGGTATGACTACGGCCACTATCTATAATGTTGGGGCCATCCAGCC     | 4 |
| wt-2940-3060 | 2880 | ATGGAGCGGACTGACGGCCCTCCGTGCCCTACGCCGAAAGTTCATGGGCACAGCGGCCGTCGACAGCGCCCTCGAGCTGTTCTCGCCCTGTACCCGCCCCGTGCATCTCGGGCTA      | 8 |
| wt-3060-3180 | 2881 | CGCGCGCCCCGGGGCCAGTGTGTGATCGAGCATCTGGGGTCCCTAGTTCCAAAGGGGGTCTGCTGTTTCTGTCTCACCTACCCGATGATGTTAAGGACGGGCTCGGAGAAAT         | 4 |
| wt-3180-3300 | 2882 | GGGGCCGGCCAGGGCCACGGACCTGGAATGCAGCAGTTTGTACAGACTACTTCTCAACCCCGCTTCCAAACCTTTCATTACAGTGAAGCAGCGAGGGGAGAAATCAACGGCCG        | 4 |
| wt-3300-3420 | 2883 | TACCGTCTCAAGCGCTCGGACGCGCATGCGATATGGCAGGCTGCCAGCACTATGTGCTGGGCTCCACGGTTCCTCGTGGACTCAACTTGTCAACGACCTGGCGTCCCGGTTTC        | 4 |
| wt-3420-3540 | 2884 | CACCGCGAGATGATGGATGATTTCTCTCCCTTTCACCGTGGAGTTCCCGGATTCAAGAGGAGGGCCAAAGTTCCTCGGTACCTTAGATGTGGACGAGAGCATGGACATCTCTCC       | 4 |
| wt-3540-3660 | 2885 | GTCTTACGAGTTCGCCCTGGCTCGCTGGAGTTCATGCCTCACAAGCATCCTGTACACCCACCAGTGGGAAGCAAGGAGCACTTGGTACGGCACACGGACAGGGTCAGCGGAGGACGGT   | 4 |
| wt-3660-3780 | 2886 | GGCACAGCAGCCCGGGTAGTCCCTGGACCTGCCGCTGGCGACTACGCTTCTGTTGCCACAGCTAGGCTGTGGACAGGCCGGTGGGGCTCTCCCTTGCCTATCGTACCTGGGA         | 8 |
| wt-3780-3900 | 2887 | TCGAATGACAGAGAAGCTGCTTGTCTCCGAAAACCGCGGGAGAGAAAGCTTAAAGTTTTCAGGTACCGTATTAGTTGGGAGAACAGGGGTAACAAGTGTCTGGATCTGAGGGAGGG     | 4 |
| wt-3900-4020 | 2888 | AACCAGGCTGGCAATGGCTGAGGCGTGTGAACGACGATGTGCCCAATCTGGATCCGGAAGACGCTTGTCTCACCTGCATCTACACCTGGATCCGCGCGGGCAGACAACCTCGGC       | 4 |
| wt-4020-4140 | 2889 | CGTGTGAGGCTATGACGGCGGAGTACTACGCGCTGGCTGGCGTGAAGCTGACCTTTGGCTCGGCTCTGCCCGAGACCGGCTCGTCCGCTCAACTTCATGACCGTGGT              | 8 |
| wt-4140-4260 | 2890 | GGCCTCTGTCTCCGCCACAGGGAAATCTCGGGTCTCTGATCAGCCAGTGTTCAGAAAGCGGGCAGTCTCTGATTGCGGTGCGTTCGCGGGATGGCAAGATCCAGGGAGGTCGCT       | 4 |
| wt-4260-4380 | 2891 | GTTTGAGCAGCTTTAGCGACGTGGCCACGACCCACGGGACCCGAGGCGTGTCTCTGAAGAATCTTCCCGGCGAGTCCAGCAGCTGGTCAAGAGCGGCATCGTGTGTCAGGGCA        | 4 |
| wt-4380-4500 | 2892 | TGACATCAGCAGCGGGGCTGGTACCTGCTGTGGAGATGGCCCTGGCCGGCAGCGGGAGTGACATCACTATGCCGTGGCTCCGACTACCTCCGGAGATGTTTGCAGAGCA            | 8 |
| wt-4500-4620 | 2893 | CCCCCGCTGGTGTGAGGTGGAGGAGCGCAGCGTGGGTGAGTGTGCTGACAGCCCTCGCTCCATGAACATGTACCCGCGAGTCCCTCGGTGAGTGGCGAGCAAGGTCCAGATAAAT      | 4 |
| wt-4620-4740 | 2894 | GTTTGAGGTGCAGCAGCGCCAGAGACGGTGTGCGCCAGTGCCTGCGCTGCTGCTGGAACTGGTATCTTTTCCAGCGAGCAGTACGAGTGCCTGCGACCAGATCGGATTAACCG        | 4 |
| wt-4740-4860 | 2895 | GTCCATGCACGTGTCCGACTACGGCTATAACGAAGCACTGGCAGTCTCCCGTGTGACAGAAAGAAATCTACGCCACGCGGTTGGTGAACAGGCTGACCCACGATGTGAGGTGGCCGT    | 4 |
| wt-4860-4980 | 2896 | GCTATGCGCCCGGGCACCAGGGCCATGAAAGCCTCTGGCGGCTTACGAATGCCGGATGCCTGTGCCGACGGGTGTTCTTCCGCGAGGTTAGGGACAACAGTTCCTCGACAAGTA       | 4 |
| wt-4980-5100 | 2897 | CGTGGTCTGGCCATCGGAGGATTCATGGGGCAGGACTTGCCTGGCAGGCCGTGCCACCGTGGCGCTGATTAATCGTTTCCCGCCCTGCGTGAAGTATTCTAAAGTTCTCAA          | 4 |
| wt-5100-5220 | 2898 | CAGGCCAGATACGTTCTCGGTGGCCTTGGGGAGCTGGGGTGAAGTTTGGCTGGCCTGGGGCCGTGGGGTCAACAGATAATCCACCCGCCCTGGCGTGGAAAGTAAATGTCAGAG       | 4 |
| wt-5220-5340 | 2899 | ATCACCTCTGATTCTGGCCCCAACGCCCTTGGCATGTTTGTAGTCCCGCTGGCTGAACATTAGCATCCCGGCGACCACGCTGTGCATGCTGCGTGGCCTCCGGGGCTGCGTCTGCC     | 4 |
| wt-5340-5460 | 2900 | TTGTTGGTGCAGGCTCGTGCCTGGCCGTCGAATTTACTAACCTCGGGATGCCATATGTTTTGCAGAATGCCACCAGATCGCTGCCACTTCCACAGCAATGGCACGGATGCTGGCG      | 4 |
| wt-5460-5580 | 2901 | CTTTGCTATGAATTTACAAAGAACCCACGGAGCAGGGCAACATTGCAGGGCTCTGTTACGCGATGGTGTGATCTGGCTCTCTGTGTGACCCCTCACTTTGTACAGACTTTTGGA       | 4 |
| wt-5580-5700 | 2902 | ATGGGAGCACATTCGCCCGCTTTGGGCACCCACGGGCTGCTCCCTGGACACTTATGTTTCAAGCAGTCACTATGGTCACTCAGGCAGGTCGCCCTCCGAGTGACCAGTCAAC         | 4 |
| wt-5700-5820 | 2903 | CTTCCAGACTATGCATACACTGAATTTAGCCTGATATTTGCCCTAGCCCGGGCCACGCCCTCTCAGAAAACTCGCATGGAGAAGCTGGACGTGAACCTCCCGCCAGCCTGTGT        | 4 |
| wt-5820-5940 | 2904 | GCTGTATTTACAAACTACAATAAACCAATGTGCAAAATGTGGTTGTATGGTACTTTGTGTTCTAAAAAATGCAACAATAGAAGTGGAAACCCCTCAGTCACGGGACATTAACTCA      | 4 |
| wt-5940-6060 | 2905 | ACCACAAATGGGGTTGGAGAAAGTAAACCACATATACTGGAGATGATTCATGGGCTGGGGTTCGGGACAAATACCCATCTGGAGTTCAACTAATTACATGGTAGATAAAATTAAGA     | 4 |
| wt-6060-6180 | 2906 | GTCCCTCCTACCACCTGAAACTATGGCAGACATTCTATAAGATAACGAGGAGAGATGAGGTGAGGGCAGAGGACATTTGGCAGGTGTGGCCACGGGGCAGCTGGCCATATCCCGGCA    | 4 |
| wt-6180-6300 | 2907 | CTACAGAAGTGAAGCAAGTGAAGGCTCGGAAGGCGAGGGCGGCTAGCAATGTACAGCTAAATGCCACCAGGGCACACACTCAAGCGGGTCTCGGAGCTCTAGGTGACAGCCAC        | 4 |
| wt-6300-6420 | 2908 | GAAAGGTGACCTGCAAGGTGGATGGCGTGTCTGAGGTTATCCCGCTACGTGCAAGTCTGGGTGATAGAGACCCTAGAATGTGCAAAATGACCAAGCTGCCCGCAGCGGGGCTC        | 4 |
| wt-6420-6540 | 2909 | CCAACACGGGTTCCAGAGAGGGTAAAAGAGGGGCCATAAAGCCAGGGTGTAAAACACCAGCCGCGCCACCAGATGGCACAGTGGGGGAAATGAGGGTTAGCATAGGCAACCCCGC      | 4 |
| wt-6540-6660 | 2910 | CTACACACCAACTATAGCAAACCCGCCCGTACGGTACGCTAGTCTGTCTTGGAGAGATGTAGACTGTAGACACTGCAAAACCTCAGGACCTACGCTGCCCTAGAGGTTTGTAGG       | 4 |
| wt-6660-6780 | 2911 | GAGGAGACGTGTGTGGCTGTAGCCACCCGTCGGGGTACAAAGTCCCGGGTGGTGGAGCAGGTGTCTGTGGTTGTCTTCCAGACTCTGCTTCTCGCGTCTCGGTCAAGTACAGCTGG     | 4 |
| wt-6780-6900 | 2912 | TGGTCCGATGTTTGTATCCAACTTTGTTTGTAGGATTTATGCATCCATTATCCCGCAGTCCACCTAAACCGGGCTTAAAGTTCATCCCAAGAGATGACCGCTTAAACCCGCTACA      | 4 |
| wt-6900-7020 | 2913 | ACGGTACAGTGTGTTTACCAGCATGATAGAGTTACGGTTCGCTACATCAACAGGACAGCCGTTCCGCTAGTGGTTTCGGACACAGCCCAAGCTCAGTGGGCTGACCCGCG           | 4 |
| wt-7020-7140 | 2914 | AGGTCAAGTCCCGGGGAGGAGAGAGGCTTCCCGCTAGACACTTTCGCAAGTCAAGTCTCTAATCCCTTGGGAGAAAGGTTATCGGCTTGTCCGCTATTTTTTGTGGCTAGTT         | 4 |
| wt-7140-7260 | 2915 | TTGCACCCACAACATGTAAGGGCCGCTACCCCTACAACAAAAACAACATCTCCCTAACCATCTTTTGCATCAATTTCTGTGACAGGGTTTCTGGACACCCAGTCTTAGTTCA         | 4 |
| wt-7260-7380 | 2916 | GGTAGACACCCAGTTATGACGTGCCACCAATCCAACTTTTTAAACCTCTGGAATTTCTATCAATAAACGGCATGCAGGAAAAGGACAAGCAGGAAAATTCACGCCCTTGGGAGG       | 4 |

|                |      |                                                                                                                           |    |
|----------------|------|---------------------------------------------------------------------------------------------------------------------------|----|
| wt-7380-7500   | 2917 | TGGCGGCATATGCAAGGATAGCACTCCACTCTACTACTGGGTATCATATGCTGACTGTATATGCATGAGGATAGCATATGCTACCCGGATACAGATTAGGATAGCATATACTACCCAG    | 4  |
| wt-7500-7620   | 2918 | ATATAGATTAGGATAGCATATGCTACCCAGATATAGATTAGGATAGCCTATGCTACCCAGATATAAATTAGGATAGCATATACTACCCAGATATAGATTAGGATAGCATATGCTACCCAG  | 4  |
| wt-7620-7740   | 2919 | ATATAGATTAGGATAGCCTATGCTACCCAGATATAGATTAGGATAGCATATGCTACCCAGATATAGATTAGGATAGCATATGCTATCCAGATATTTGGGTAGTATATGCTACCCAGATAT  | 4  |
| wt-7740-7860   | 2920 | AAATTAGGATAGCATATACTACCCCTAATCTCTATTAGGATAGCATATGCTACCCGGATACAGATTAGGATAGCATATACTACCCAGATATAGATTAGGATAGCATATGCTACCCAGATAT | 4  |
| wt-7860-7980   | 2921 | AGATTAGGATAGCCTATGCTACCCAGATATAAATTAGGATAGCATATACTACCCAGATATAGATTAGGATAGCATATGCTACCCAGATATAGATTAGGATAGCCTATGCTACCCAGATAT  | 4  |
| wt-7980-8100   | 2922 | AGATTAGGATAGCATATGCTATCCAGATATTTGGGTAGTATATGCTACCCATGGCAACTATAGCCACCCTGCTCTGACGACCTCGTGAATATGAGGACCAACACCCCTGCTTGGCG      | 4  |
| wt-8100-8220   | 2923 | CTCAGGGCAGTGTGTGTAATTTGCTCCAGATCGACAACTGACCCGCCCTATCTGGGCCGCCACTACTTATGCAAGTATTCGCCGGGTGCCATTAGTGGTGTGGGCAAGT             | 4  |
| wt-8220-8340   | 2924 | GGTTTGACCCGAGTGGTTAGCGGGGTACAATCAGCCAAAGTTATTACACCCCTATTTTACAGTCCAAAACCCGAGGGCGGCGTGTGGGGGCTGACGCGTGCCCCACTCCACAATTTCAA   | 4  |
| wt-8340-8460   | 2925 | AAAAAAGAGTGGCCACTTGTCTTTGTTATGCGCCCATTTGGCGTGGAGCCCGCTTAATTTTCGGGGGTGTAGAGACAACCAAGTGGAGTCCGCTGCTGCGGCGTCCACTCTCTTTCC     | 4  |
| wt-8460-8580   | 2926 | CCTTGTACAATAAGAGTGTAAACAATGGTTCACCTGCTTTGGTCCCTGCCTGGGACACATCTTAATAACCCAGTATCATATTGCACTAGGATTATGTTGGCCATAGCCATAAAT        | 4  |
| wt-8580-8700   | 2927 | CGTGTGAGATGGACATCCAGTCTTACGGCTGTCCCACCCCATGGATTTCTATTGTTAAAGATATTCAGAATGTTTCATTCTACACTAGTATTTATGCCAAGGGTTTGTGAGGG         | 4  |
| wt-8700-8820   | 2928 | TTATATTGGTGTACATAGCACAATGCCACCCTGAAACCCCGCTCAAATTTTATTCTGGGGCGTCACTGAAACCTGTGTTTCGAGCAGCTCACATACACCTTACTGTTCAACTCAG       | 4  |
| wt-8820-8940   | 2929 | CAGTTATTCTATTAGCTAAACGAAGGAGAATGAAGAAGCAGGCGAAGATTGAGGAGAGTTCAGTCCCGCTCCTTGATCTTACGCCACTGCCCTTGTGACTAAAATGGTTCACTACCCCTC  | 4  |
| wt-8940-9060   | 2930 | GTGGAATCCTGACCCCATGTAATAAAACCGTGACAGCTCATGGGTGGGAGATATGCTGTTCTTAGGACCTTTTACTAACCTAATTGATAGCATATGCTTCCCGTGGGTAACA          | 4  |
| wt-9060-9180   | 2931 | TATGCTATTGAAATAGGGTTAGTCTGGATAGTATATACTACTACCCGGGAAGCATATGCTACCCGTTTAGGGTTAAACAAGGGGGCTTATAAACACTATTGCTAATGCCCTCTTAGGGT   | 4  |
| wt-9180-9300   | 2932 | CCGCTTATCGGTAGCTACACAGGCCCTCTGATTGACGTTGGTGTAGCCTCCCGTAGTCTTCTGGGGCCCTGGGAGGTACATGTCCCCAGCATTGGTGTAAAGAGCTTACGCCAAGAGT    | 4  |
| wt-9300-9420   | 2933 | TACACATAAAGGCAATGTTGTTGCAAGTCCACAGACTGCAAAGTCTGCTCCAGGATGAAAGCCACTCAGTGTGGCAATGTGCAATCCATTATAAGGATGTCAACTACAGTCAGAG       | 4  |
| wt-9420-9540   | 2934 | AACCCCTTTGTGTTGGTCCCCCGTGTACATGTGGAACAGGGCCAGTTGGCAAGTTGTACCAACCAACTGAAGGATTACATGCACTGCCCGCGGAAATACGCTCCTACCCAGG          | 4  |
| wt-9540-9660   | 2935 | AACCCGAAACAGTGTTCAGAGAAGCTGTAATAAAGACGCCCTGGAAGTGCACACTGTGCAATGCAGCTTTAGCCATGCCATGCTCTATAAATCACTTCCCTATCTCAGGTAGGCC       | 4  |
| wt-9660-9780   | 2936 | TGCACACCTTAGGTATGGAGCGAAGGTTAGTGGTCACTCTGCAGTGCCTGGTGTGCTTTACCTGGCACCTGAGTGTGGAGGTACAGACCAATGTGACAATTTTCCCAAAATGTTGAGGG   | 4  |
| wt-9780-9900   | 2937 | ACCTAAGAGATGCCCTCAGTCGTGTTAAACCTTTTTCCAGACAAGGACGAGGTAGATAACCTTTTGCTCAAGGAGTCTCTGCTAGAGGACTTTAAGGGCTACCTTGGATGCCAGGCC     | 4  |
| wt-9900-10020  | 2938 | TGTCAGAAATGATCCAATTTCTACTCGGGAAGTCTGCCCACAGGCTGAAAACCCAGGACCTGAAAGCCAAAGACCATTGCAATTTCTTTGGGTGAAATGTAAGACCCTACGGCTCCGCC   | 4  |
| wt-10020-10140 | 2939 | TGCGCAGGTGCCACAGTTCCTGCCGTGTGAGAACAAGAGTAAAGCTGTGGAACAGATAAAAAAGTGCCTTTAAACAAGCTGCAAGAAAAAGGAAATTTACAAGCCATGAGTGAATTTGACA | 4  |
| wt-10260-10380 | 2940 | AAATGAAACCTTTTATTCTTGATTGCCCTTGTGTTCTTCCGCCAGGTACCTTCTGTGTTCTCCCCACGGAAAAAAGAAATAGCTTCTGCAGAAGGCCATTGACGCAAGTTTGGCCG      | 4  |
| wt-10380-10500 | 2941 | TGGGGATTACCCGACCCAGCCACTTACAGCACATTTTGTCTAGGTCCATCTTAGGAGCCCGGGCCAGCATTCTATCAGCTTAAACGGGAAGAGAAGTGGGGAGGGCACTCGCCACTAAC   | 4  |
| wt-10500-10620 | 2942 | CTTAACACCTGCAGCCTACAAAAGTACACTAGCTGTTTGTCTATTTCGCCACTAGAGACCCCAAGATGCGAAACTACAGGCCCGGGCCAGGCCCTGCAGGGCAGACGGTTAGGCTGAC    | 4  |
| wt-10620-10740 | 2943 | AAGGGACCAAGTGTGGCAGTGGCGGGGAAGGGGACAAAGAAATGCCGGGAACTGGACCCGCTCACCCCGCCCTCAAGCGTCCGGAGCCGGGGCTCGCTAAGGAGGGCGGCCCT         | 8  |
| wt-10740-10860 | 2944 | TGCCAACAATATTAGTAGCTACCAACAAGGGCCCCAGATGCCCCCAAGATCACCCCGGTGTCCCACTCACATATCCACTTTATTTTAAATTAATGTGCCCAATTAGAAACC           | 4  |
| wt-10860-10980 | 2945 | CAAGCGCAGAAATAGTTGAGAGGCTAGTGTTTAAACATGCACCTTAGGCCAGCCAGAGATAATGTCACAAGATTATCAAGTTGGTGTAAACACGCCGTGGGAAAAAATTTATGGTTCA    | 4  |
| wt-10980-11100 | 2946 | GTGCGTCGAGTCTATCTTTGGAACAGTAGAAAATGAACTTGTGGCGGGAGAAAGAAATACGCCCTTATCTGGGAGGAGCGACGGATTATAGCCAATAAGAGAGCTCAAGACCGCAGGG    | 4  |
| wt-11100-11220 | 2947 | CTCGCAAAGTATAGTGGCCCGTGGACCTTAGAGGTGGAGCAACGTCTAAAGTGGTAAATACACCAGGCGGGGCTGGGCAAAGGGTCTACGGGCGGGGATTAATACGCCCTTGTCTAC     | 4  |
| wt-11220-11340 | 2948 | GCAAGCTCAGTTAATTCGCCACGACTTGAAAAATGAGCCCTTAAACCAATTTGGCGGCCCTAAGGGGGGACTAAGTCCCCTACAAAAACTCTGTCTGTCTGCAAAATTTAGATC        | 4  |
| wt-11340-11460 | 2949 | AGATGGCATAGAGACAAGGACACCCGAAGCCACCCAGAGCCCTATCGCAGGGTCTTACCATGCGGCCATGTAGGCCACTTAACTACAAGACCTACGCCCTTCCATTATCATGTAA       | 4  |
| wt-11460-11580 | 2950 | CCCACAAATCATCTAAACCGTAAGTCTAAGGGCCTCCTGAGGTTTTCTCAGGAGGCCCTAATGTATAATTAATCATGCATTTGATTTTAAAAAAGTAGGTTACACTCATTTTAGGCCAGA  | 4  |
| wt-11580-11700 | 2951 | CTTTATTGCGAGATTAATAATTTATGTATTCTCCTTCCCTTAGGACTGAAGAAACAGCCCTCTGCAGTGTAGCATGTATCTGAAATAATTTATGTATAGTGAATGATTAGAAA         | 4  |
| wt-11700-11820 | 2952 | GTCATAAACCCACTTCCCTTTACATGAATCTGGGCACTGAAATTTTGGGTACTCTTAAAGACTAACGTGTTGATTTTGGGGTCACTTCCCTTTTATAAGTGTGTGAACAGTGAATTTCA   | 4  |
| wt-11820-11940 | 2953 | GTAACACTAAGAGATATTTGGTGTCACTTCCGCTTTAAGTTTTCAGAAAATTTAAAAATTAATTTGAAATTTCTCTCAAAAATTTCCAATGAAACTTCAAGAATCTTATGTATG        | 4  |
| wt-11940-12060 | 2954 | TAATTTCTTTTGGCCAAACTGGGCTTCCAGATGCTTCTATTGCACTCTCAAAAAAATTTCTGGACACATGTGCCAGACGCTGGGCTTAAAGGCCCTCGGGTCCCTGGACCCCGGC       | 4  |
| wt-12060-12180 | 2955 | CTCAGCAACCTGCTGCTCCCTCCTGCCACCCAGCCCTCCCCCTCCCGTCCCGCTCGCTCCTGTTCTCCCGGGTCCCCAGTAGGGCCGCTGCCCCCTGCACCCAGTACCTG            | 8  |
| wt-12180-12300 | 2956 | CCCTCTTGGCCACGACCCCGGGCCAGGCCACTTAGACCCGGCCAAAGCCCATCCCTGAAGACCAGCGGCCATTCTCTGGTACGAGCAGAGAAGAAGTAGAGGCCCGCGCCAT          | 8  |
| wt-12300-12420 | 2957 | TGGGCCAGATTGAGAGACCAAGTCCAGGGCCGAGGTTGGAGCCAGCGGGCACCCGAGGTCACAGCACCCGCTCCCTCCGGGGGACAGAGACAGGAGGGCCCGCCCGGAGCTGGCC       | 8  |
| wt-12420-12540 | 2958 | GAGGAGGCGCCGGAGTGGGGCCGCTCGGCTGGGCTGGCCAGCCGGGCTGAGGAGTCTGGGGTGGCGAGCCTGCTGTCTCAGGAGGGGCTGGCTCCGCCGGGTGGCCCTGGGGTAA       | 12 |
| wt-12540-12660 | 2959 | GTCTGGGAGGACAGAGGCTCGCCCTAGGCCCGGGGAAGTGGAGGGGATGCGCCGGTCTGTTGGCAGAGTCCGGGATCCTCTGAGACCTCCCGGGCCGAGCGGTCGCCCTCAGC         | 8  |
| wt-12660-12780 | 2960 | CCCCAGACAGACCCAGGCTCTCCAGGCAGGCTCCGGCATCTTACAGGGCAGCAGGCTCACCACCACAGGCCCCAGACCCGGTCTCGGCCAGCCAGCCGACCCGCCCGCTG            | 8  |
| wt-12780-12900 | 2961 | CGCTCCTCGGGCCAGCCCGGGGTTGGTCTGCCCTCTCTGTCTTCCAGAGGAACAGGACCTCGGGCACCCAGAGCCCTCGGGCCCGCTCCAGGCCCTCTGGTCTC                  | 8  |
| wt-12900-13020 | 2962 | CGCTCCCTCTGAGCCCGTTAAACCCAAAGAAATGTCTGAGGGGAGCCACCTCGGGGCCAGGCCCCAGAGTCCAGAGGTCAGGGGACCTCAGGGTGCCTCCCGGGTCCAGGCCAG        | 8  |
| wt-13020-13140 | 2963 | CCGGAGGGACCCCGCAGCCCGGGCGCCAGAGGCCGTTCTCGCCCTTCCCGGGCTCAGAGCCAGGATGCCCCAGAAGGACCTTAGGGCTCCCTCTCTCCCTCCCTCCAG              | 8  |
| wt-13140-13260 | 2964 | CGCCGAGCTCTCCCTCGGGGAGGGCCCTAGTGGCCCTCAAGTGGCCACCCAGGACCCGAGTGGCCGGATCCTCTGAGACCTCCCGGGCCGAGCGGTCCTCTGTCCTCCCTCTCCAA      | 8  |
| wt-13260-13380 | 2965 | CCTTCTGCTCCACCCTAGACCCAGCTTCTGCGCTCCCGGCTCACACAGGCCAGCCCGGACCCCGGACCCCGGAGTGCCTTCCCTCTCCCTCGGCTCTCTCCCGCTCC               | 8  |
| wt-13380-13500 | 2966 | CACCCGAGCCCTCAGCTTGCCTCCACCCGGGTCATCAGCCGGCCGAGGAGCCCGGGCGCCGGTGTGAGTCCCTCTGAGCCGCCAGCTCTGCTCCAGGCAAGGGCGCC               | 12 |
| wt-13500-13620 | 2967 | AGCTTTTCTCCCCAGCCTGAGGCCAGTCTCCTGTGCACTGTCTGTAAGTCCAGCCTCCACGCCGCTCCAGGGTCCCGGGCCAGCCTCGTCCACCCCTCCACCGTGGACAGG           | 8  |

|                |      |                                                                                                                                      |    |
|----------------|------|--------------------------------------------------------------------------------------------------------------------------------------|----|
| wt-13620-13740 | 2968 | CCCTCTGTCCACCCGGGCCATCCCCGCCCCCTGTGTCCACCCAGTCCCGTCCAGGGGGGACTTTATGTACCCCTTGGGCTGGCTCCCATAGACTCCCATGTAAGCTGCGCTCGAGT                 | 8  |
| wt-13740-13860 | 2969 | AGGTGCCTCCAGAGCCCTTTTGCCTCCGCGGCCAGCCGACCCCGGGCCGCCCAAACCTTTGTCCAGATGTCCAGGGGTCCCCGAGGGTGAGGCCAGCCCTCCCGCCCTG                        | 8  |
| wt-13860-13980 | 2970 | TCCACTGCCCGGTCCCCCAGAAGCCCAAAAGTAGAGGCTCAGGCCATGCGCGCCTGTACCAGGCTGCCAAAGAGCCAGATCTAAGGCCGGGAGAGGCAGCCCAAGCGGGTG                      | 8  |
| wt-13980-14100 | 2971 | CAGTAACAGGTAATCTCTGTGTAGTATTGGACCCGAAATCTGACACTTTAGAGCTCTGGAGGACTTTAAACTCTAAATAAATAAACTTTAGAGGCGAATGGCGCCATTTTGTCCCA                 | 4  |
| wt-14100-14220 | 2972 | CGCGCGCATAATGGCGGACCTAGGCCATAAACCCCGAGGACGGGTCTATGTTGGTGCCTGTCTATCTTTAGAGGGGAAAAGAGGAATAAGCCCCAGACAGGGGAGTGGGCTT                     | 4  |
| wt-14220-14340 | 2973 | GTTTGTGACTTACCAAAGTCAAGGCCCAAGGGGTTCCGCTTGTAGGCCACTTCTCAGTCCAGCGCTTTACGTAGCCAGACAGCAATGTCAGTTCTAGGAGGGGGACC                          | 4  |
| wt-14340-14460 | 2974 | ACTGCCCTGGTATAAAGTGTCTGACGCTATTTCTGTGTCATGATCCCCGGCTTCCAGGCCCTCCAGCCCTCCGCTCCAGAGACCCGGGCTTCTACCTCTCCCTAGCCCTCCGCCCT                 | 4  |
| wt-14460-14580 | 2975 | TCGGGCCCCAGTTTCTAACTTTTCCCTTCCCTCCCTCGTCTTGCCTGCGCCCGGGGCCACCTTCATCACCCTCGTGTACTCCGCCATCCAAGCCTAGGGGAGACCGAAGTGAAGGCCCT              | 4  |
| wt-14580-14700 | 2976 | GGACCAACCCGGCCCGGCCCCCGGTATCGGGCCAGAGGTAAGTGGACTTAAATTTTTTCTGCTAAGCCCAACTCCACCACACCCAGGCACACACTACACACCCACCCTGCTCAG                   | 4  |
| wt-14700-14820 | 2977 | GGTCCCTCGGACAGCTCTAAGAAGGCACCGTCCGCCAGCTACCAGAGGGGGCAAGAACCAGCCAGAGTCCGTAGAAGGGTCTCGTCCAGCAAGAAGAGGAGGTGGTAAGCGGT                    | 4  |
| wt-14820-14940 | 2978 | TCACCTTCAGGGTAAGTAACTGACCTTCCAGGGCTACATAAAGGAGGCTTAGTATACATGCTTTCTGCTTTTACAGGAACCTGGGGGTAGTCTGGGTGGGATAGGCTGCCTC                     | 4  |
| wt-14940-15060 | 2979 | AAGTTGCATCAGCCAGGGCTTCCGCTCCCTCAGTCCCTGCTCCCGGGCTTCCAGGCCCTCCGCTCCAGAGACCCGGGCTTCCAGCCCTGCTCTCCCTGTTACCTTT                           | 4  |
| wt-15060-15180 | 2980 | TAGAACCACAGCCTGGACACATGTGCCAGACGCTTGGCCTCTAAGGCCCTCGGGTCCCCCTGGACCCCGCCCTCAGCAACCTGCTGCTCCCTCCTGCCACCCAGCCTCCCCCTC                   | 8  |
| wt-15180-15300 | 2981 | CCCGTCCCCCTCGCTCCTGATCCTCCCGCGTCCCCAGTAGGGCCGCTGCCCCCTGCACCAGTACCTGCCCTTGTGGCCAGCCACCCGGGCCAGGCCACCTTAGACCCGGCCAA                    | 8  |
| wt-15300-15420 | 2982 | GCCCCATCCCTGAAGACCCAGCGCCATTTCTCTGTGTAACGAGCAGAGAAGAAGTAGAGGCCCGCGCCATTGGGCCAGATTGAGAGACCAGTCCAGGGGCCGAGGTTGGAGCCAGC                 | 4  |
| wt-15420-15540 | 2983 | GGGACCCGAGGTCCAGCACCCGGTCCCTCCGGGGGCGAGAGACAGGCAGGGCCCCCGGCAGCTGGCCCGAGGAGCGCCCGGAGTGGGGCCGGTCCGCTGGGCTGGCCGAGCCCGG                  | 12 |
| wt-15540-15660 | 2984 | GTCTGGGAGGTCTGGGGTGGCGAGCCTGTGTCTCAGGAGGGCCCTGCTCCCGGGGTGCCCTCCAGCAAACTGTAAGAGGGGGTAAAGTCTGGAGGCAGAGGGTCCGCTTAGGCCCGGGGAAGTGGAGGGGAT | 8  |
| wt-15660-15780 | 2985 | CGCCCGGTCTGTGGCAGAGTCCGGCGATCCTCTGAGACCCTCCGGCCCGGACGGTCCGCTCAGCCCCCAGACAGACCCAGGGTCTCCAGGCAGGGTCCGGCATCTTACAGGG                     | 8  |
| wt-15780-15900 | 2986 | GCAGCAGGCTCACCACCAGGCCCCAGACCAGGCTCTGGCCAGCCAGCCGACCAGCCCGCCGCTGGCCCTCCTGGGGCCAGCCCGGGGTTGGTTCTGCCCTCTCTGT                           | 12 |
| wt-15900-16020 | 2987 | CCTTCAGAGAACCCAGGACCTCGGGCACCCAGAGCCCTCGGGCCCGCTCCAGGCCTCCCTGGTCTCCGCTCCCTCTGAGCCCGTTAAACCCAAAGAATGCTGAGGGGAGCC                      | 8  |
| wt-16020-16140 | 2988 | ACCCTCGGGGCCAGGCCAGAGTCCAGAGGTCAGGGGACCTCAGGGTCCCTCCCGGGTCCCAAGCCAGCCGAGGGAGCCCGGCAGCCCGGGCGGCCAGAGGCCGTTCTCCG                       | 12 |
| wt-16140-16260 | 2989 | CCCTTCCCGGGCTCAGAGCCAGGATGCCCAAGAAGGGACCTAGGGCTCCCTCCTCCCTCCAGGCCGAGCCCTCTCCCTCGCGGAGGGGCTCTTTGGGCCCTAAGTC                           | 8  |
| wt-16260-16380 | 2990 | CAGCCCCACCGAGACCCGAGTGGCCGGATCCCCCACCAGCCCTTCTCTGTCCCTGCTCCTCCAACCTTCTGCTCCACCTAGACCCAGCTTCTGGCCTCCCGGGTCCACCA                       | 8  |
| wt-16380-16500 | 2991 | GGCAGCCGAGGGACCCCGCAGCCGGGAGTGCCTTCCCTCCTCCCTGCTCCTTCCCGCTCCACCCGAGCCCTCAGCTTGCCTCCCACCGGGTCCATCAGCCCGC                              | 12 |
| wt-16500-16620 | 2992 | CGGAGGGACCCCGCGCCCGGTGTGCTCCCGCTGACGCGCCAGTCTGCTCCAGCAAGGGCCAGCTTTTCTCCCCAGCCTGAGGCCAGTCTCCTGTGACTGTCTGT                             | 8  |
| wt-16620-16740 | 2993 | AAAGTCCAGCTCCACGCCCTGCCAGGCTCCCGGGCCAGCCTCGTCCACCCTCCCAAGGTCAGCCGCTGTGCCACCCGGCCATCCCCGCCCTGTGTCCACCCAGTC                            | 8  |
| wt-16740-16860 | 2994 | CCGTCCAGGGGACTTTATGTACCTTGGCTGGCTCCCATAGACTCCATGTAAGCTGCCTCGATAGTGTCTCCAGACCCCTTTTGCCTCCGCGCCAGCCGACCC                               | 8  |
| wt-16860-16980 | 2995 | CCGGGCGCCCAAACTTTGTCCAGATGTCCAGGGTCCCGGAGGGTGAAGCCAGCCCTCCCGCCCTCCAAGGACTCGGGCCAGTTTCTAACTTTTCCCTTCCCTCCCTGCTTGCCTG                  | 8  |
| wt-16980-17100 | 2996 | CATGCGCCCTGTACCAGGCTGCCAAAGAGCCAGATCTAAGCCGGGAGAGGCAGCCCAAGCGGGTGCAGTAACAGGTAATCTCTGGTAGTATTGGACCCGAAATCTGACACT                      | 4  |
| wt-17100-17220 | 2997 | TTAGAGCTCTGGAGACTTTAAACTCTAAATAAATAAACTTTAGAGGCGAATGGCGCCATTTTGTCCCAACCGCGCATAAATGGCGACCTAGGCCTAAACCCCAAGAAAGCGGGT                   | 4  |
| wt-17220-17340 | 2998 | TATGGTTGGCTGCGCTGTCTATCTTTAGAGGGGAAAAGAGGAATAAGCCCCAGACAGGGGAGTGGGCTGTTTGTGACTTACCAAAGGTCAGGGCCCAAGGGGTTCCGGTGTCTA                   | 4  |
| wt-17340-17460 | 2999 | GGCACCTTCTCAGTCCAGCGGTTTACGTAAGCCAGACAGCAGCAATTGTGACTTCTAGGAGGGGACCAGTCCCTGGTATAAAGTGGTCTGCAGCTATTTCTGGTGCATCAG                      | 4  |
| wt-17460-17580 | 3000 | AGCGCCAGGAGTCCACACAAATGTAAGAGGGGCTTCTACCTTCCCTAGCCCTCCCGCCCTCCAAGGACTCGGGCCAGTTTCTAACTTTTCCCTTCCCTCCCTGCTTGCCTG                      | 4  |
| wt-17580-17700 | 3001 | CGCCCGGGCCACCTTCATCACCCTGCTGACTCCGCCATCCAAGCCTAGGGGAGACCGAAGTGAAGGCCCTGGACCAACCCGGCCCGGCCCCCGGTATCGGGCCAGAGGTAAGTGA                  | 8  |
| wt-17700-17820 | 3002 | CTTAAATTTTTTCTGCTAAGCCCAACTCCACCACCCAGGCACACTACACACCCACCCTGCTCAGGGTCCCTCGGACAGCTCCTAAGAAGGCACCGGTGCCCGCTCTACC                        | 4  |
| wt-17820-17940 | 3003 | AGAGGGGGCAAGAACCAGACAGTCCGTAGAAGGGTCCCTCGTCCAGCAAGAAGAGGAGGTGTAAGCGGTTACCTTACAGGGTAAGTAACTGACCTTCCAGGGCTCACATAAAGG                   | 4  |
| wt-17940-18060 | 3004 | GAGGCTTAGTATACATGCTTCTGCTTTTACAGGAACCTGGGGCTAGTCTGGTGGGATTAGGCTGCCTCAAGTGTATCAGCCAGGGCTTCCATGCCCTCCTAGTCCCTAGTCCCC                   | 4  |
| wt-18060-18180 | 3005 | GGGCTTACGGCCCTCCGTCCTCCGCTCCAGAGACCCGGGCTTCCAGCCCTGCTCCTCTGTTACCTTTTGAACCCCTTTAAGAACCACAGCCTGGACACATGTGCCAGAGCCTTGGCCTTAAGGC         | 4  |
| wt-18180-18300 | 3006 | CCTCGGGTCCCTGGACCCCGGCTCAGCAACCTGCTGCTCCCTCCTGCCACCCAGCCTCCCCCTCCCGTCCCTTCCCTGCTCCTCCCGGTTCCCGTGGGAGGTAAGTGA                         | 12 |
| wt-18300-18420 | 3007 | CTGCCCTGACCCAGTACCTGCCCTTGTGGCCAGCCACCCGGGCCAGGCCACCTTAGACCCGGCCAGGCCATCCCTGAAGACCAGCGGCCATTCTCTGGTAACGAGCAGA                        | 8  |
| wt-18420-18540 | 3008 | GAAGAAGTAGAGGCCCGCGCCATTGGGCCAGATTGAGAGACAGTCCAGGGCCCGAGGTTGGAGCCAGCGGGACCCGAGGTCACAGCACCCTCCCTCCGGGGGCGAGAGACAGG                    | 8  |
| wt-18540-18660 | 3009 | CAGGGCCCCCGCAGCTGGCCCCGAGGAGGCGCCGGAGTGGGGCGGTGGCTGGGCTGGCCAGCCCGGGTCTGGGAGGCTGGGGTGGCGAGCTGCTCTCAGGAGGGGCTGG                        | 12 |
| wt-18660-18780 | 3010 | CTCCGCGGGTGGCCCTGGGGTAACTGGGAGGACAGAGGTCGGCTTAGGCCCGGGGAAGTGGAGGGGATCGCCCGGGTCTGTTGGCAGAGTCCGGGCGATCCTCTGAGACCTCC                    | 8  |
| wt-18780-18900 | 3011 | GGGCCCGGACGGTCCCTCAGCCCCCAGACAGACCCAGGGTCTCCAGGCAGGGTCCGGCATCTTACAGGGCAGCAGGCTACCACCAGGCCCCCCAGACCCGGGTTCTCGGCCAGC                   | 8  |
| wt-18900-19020 | 3012 | CGAGCCGACCGCCCGCCTGCGCCTCCTCGGGCCAGCCCGGGGTTGGTTCTGCCCTCTCTGTCTTCCAGGAAACCAGGACCTCGGGCACCCAGAGCCCTCGGGCC                             | 12 |
| wt-19020-19140 | 3013 | GCCTCAGCGCCCTCCTGGTCTCCGCTCCCTCTGAGCCCGTTAAACCCAAAGAATGTCTGAGGGGAGCACCCCTCGGGGCCAGGCCCCAGAGTCCAGAGGTCAGGGGACCTCAGG                   | 8  |
| wt-19140-19260 | 3014 | GTGCCTCCCGGGTCCAGGCCAGCCGAGACCCGACCCGACCCGCGCCCGCCAGAGCCGGTCTCCGCTCCCTCCGCTCCCTCCGCTCCCTCCCGGGTCCAGGCCAGGATGTCCCCAGAAAGGACCTA        | 12 |
| wt-19260-19380 | 3015 | GGCGTCCCTCTCCTCCCTCCAGGCCAGGCTCCTCCGCGGAGAGGGGCTCTTTGGCGCTTAACTCCAGCCACCCAGAGCCGAGTGGCCGATCCCGCCAGCCCTCTCT                           | 8  |
| wt-19380-19500 | 3016 | CTCTGCTCCCTGCTCCTTCCAACTTCCGCTCCACCTAGACCCAGCTTCTGGCTCCCGGGTCCAGGCCAGCCGGAGGACCCCGGAGCCCGGGGAGTCCGCTTCCCTCTC                         | 8  |
| wt-19500-19620 | 3017 | CCCTGGCTCTCCTCCGCTCCACCCGAGCCCTCAGCTTCCCTCCACCCGGTCCATCAGGCCGCGGAGGACCCCGGGCCCGGGTGTGAGTCCCTCCCTGACCCGCGCCAG                         | 12 |
| wt-19620-19740 | 3018 | TCTCTGCCTCAGGCAAGGGCCAGCTTTTCTCCCGAGCCTGAGGCCAGTCTCTGTGACTGTCTGTAAGTCCAGCCTCCACGCCGCTCCAGGGCCAGCCTCGT                                | 8  |

|                |      |                                                                                                                          |    |
|----------------|------|--------------------------------------------------------------------------------------------------------------------------|----|
| wt-19740-19860 | 3019 | CCACCCCTCCCCACGGTGGACAGGCCCTGTGCCACCCGGGCCATCCCCGCCCTGTGTCCACCCAGTCCCGTCCAGGGGGACTTTATGTGACCTTGGGCTGGCTCCCATAGA          | 8  |
| wt-19860-19980 | 3020 | CTCCCATGTAAGCCTGCCTCGAGTAGGTGCCTCCAGAGCCCTTTTGGCCCTGGCGGCCAGCCGACCCCGGGCGCCCAAACTTTGTCCAGATGTCCAGGGGTCCCGAGGGTG          | 8  |
| wt-19980-20100 | 3021 | AGGCCAGCCCTCCCGCCCTGTCCACTGCCCGGTCCCCCAAGAGCCCAAAAGTAGAGGCTCAGGCCATGCGCGCCCTGTACCAGGCCTGCCAAAGAGCCAGATCTAAGGCCG          | 8  |
| wt-20100-20220 | 3022 | GGAGAGGCAGCCCAAGCGGGTGCAGTAACAGGTAATCTCTGGTAGTATTGGACCCGAAATCTGACACTTTAGAGCTCTGGAGGACTTTAAAACTCTAAAAATCAAACCTTTAGAGG     | 4  |
| wt-20220-20340 | 3023 | CGAATGGGCGCCATTTGTCCCCACGCGCATAATGGCGGACCTAGGCCTAAAACCCCGAGGAGCGGGTCTATGGTTGGCTGCGCTGTCTATCTTTAGAGGGGAAAAGGAGATAA        | 4  |
| wt-20340-20460 | 3024 | GCCCCACAGAGGGGAGTGGCTTTGTGACTTACCAAAGGTCCAGGGCCAAAGGGTTCGCGTTGTAGGCCACTTCTCAGTCCAGCGCTTACGTAAAGCCAGACAGGACCA             | 4  |
| wt-20460-20580 | 3025 | TTGTGAGTCTAGGGAGGGGACCTGCCCTCCGTTAAAGTGGTCTGCAGCTATTTCTGTGTAACGATCAGAGAAAGTAGAGGCCCGGGCCATTTGGGCCAGATTGAGAGCCAGTC        | 4  |
| wt-20700-20820 | 3027 | AGGGGAGACCGAAGTGAAGGCCCTGGACCAACCCGGCCCGGCCCGCCGGTATCGGGCCAGAGGTAAGTGGACTTTAATTTTTCTGCTAAGCCCAACTCCACCACCCAGGCACAC       | 4  |
| wt-20820-20940 | 3028 | ACTACACACCCACCCGCTCTCAGGGTCCCCTCGGACAGCTCCTAAGAGGGACCGGTGCGCCAGTCTACCAGAGGGGGCCAAAGAACCAGACGAGTCCGTAGAAGGGTCTCGTCCAG     | 4  |
| wt-20940-21060 | 3029 | CAAGAAGAGGAGGTGGTAAGCGGTTACACCTTCAAGGGTAAGTAACCTGACCTCTCCAGGGCTCACATAAAGGGAGGCTTAGTATACATGCTTCTGTCTTTACAGGAACCTGGGGCTA   | 4  |
| wt-21300-21420 | 3032 | CTGCCACCCAGCCTCCCCCTCCCCCTTCCCTTCCGCTCTGATCTCCCCGGTCCCAAGTAGGCCCGCTGCCCCCTGCACCCAGTACCTGCCCTTTGGCCACGCACCCGGG            | 12 |
| wt-21420-21540 | 3033 | CCAGGCCACTTAGACCCGGCCAAAGCCCACTCCCTGTAAGACCCAGCGCCATTTCTCTGTGTAACGATCAGAGAAAGTAGAGGCCCGGGCCATTTGGGCCAGATTGAGAGCCAGTC     | 4  |
| wt-21540-21660 | 3034 | CAGGGCCCGAGGTTGGAGCCAGCGGGCACCCAGGTCACAGCACCCTCCCTCCGGGGGAGAGACAGGCAGGGCCCGGACGCTGGCCCGAGGAGGCGCCGGAGTGGGGCCG            | 12 |
| wt-21660-21780 | 3035 | GTGGCTGGGCTGGCCGAGCCGGTCTGGGAGGTCTGGGGTGGCGAGCCTGCTGTCTCAGGAGGGGCTGGCTCGCGGGTGGCCCTGGGGTAAGTCTGGGAGGCAGAGGGTGGGCT        | 8  |
| wt-21780-21900 | 3036 | AGGCCCGGGGAAGTGGAGGGGATGCGCCGGTCTCTGTTGGCAGAGTCCGGCGATCCTCTGAGACCTCCGGGCCGACGGTCCGCCCTCAGCCCCAGACAGACCCAGGGTCTCC         | 8  |
| wt-21900-22020 | 3037 | AGGAGGTTCCGCGATCTTCAAGGGGACAGGCTCACACCACAGGCCCCAGACCCGGTCTCGCCAGCCGAGCCGACCCGGCCCGCCCTGGCGCTCTCGGGCCAGCCCGCGG            | 12 |
| wt-22020-22140 | 3038 | GGTTGGTTCTGCCCTCTCTGTCTTCCAGAGGAACCCAGGGACCTCGGGACCCAGAGCCCTCGGGCCCGCTCCAGGCCCTCTGGTCTCCCGTCCCTCTGAGCCCGTTAA             | 8  |
| wt-22140-22260 | 3039 | CCCAAAGAAATGTCTGAGGGAGCCACCCTCGGGGCCAGGCCCCAGAGTCCAGAGGTCAGGGGCACCTCAGGGTCCCTCCCGGGTCCAGGCCAGCCGAGGGACCCCGGACGCCGGG      | 8  |
| wt-22260-22380 | 3040 | CGGCCCCAGAGGCCGTTCTCTGCCCTTCCCGGGCTTACAGCCAGGATGTCCCCAGAAGGGACCCTAGGCGTCCCTCTCTCCCTCCAGGCCGAGCCTCTCCCTCGCGGAGA           | 8  |
| wt-22380-22500 | 3041 | GGGGCTCTTTGGGCCCTCAAGTCCAGCCCAAGGAGCCAGGAGCCGAGTGGCCGGATCCCCCAACCCGGCCCTTCTCTGTCCCGCTGCTCTCTCAACCTTCCGCTCCACCTAGACCCAG   | 8  |
| wt-22500-22620 | 3042 | CTTCTGGCCTCCCGGGTCCACAGGCCAGCCGAGGGACCCGGCAGCCGGGCGAGTCCCTTCCCTTCCCTGGCCTCTCTTCCCGCTCCACCCGAGCCCTCAGCTTGCCT              | 8  |
| wt-22620-22740 | 3043 | CCCCACCGGTCATCAGGGCCCGGAGGGACCCGGCCGGTGTGACTCCCCCTGCAGCCCGAGCTCTGCCCTCAGCCAAAGGGCGCCAGTCTGCCCTCAGCCAAAGGGCGCCAGG         | 8  |
| wt-22740-22860 | 3044 | CCCAGTCTCTGTGCACTGTCTGTAAGTCCAGCCTCCACGCCGTCACAGGCTCCCGGGCCAGCCTCGTCCACCCCTCCACGGTGGACAGGCCTCTGTCCACCCGGCCATCCC          | 8  |
| wt-22860-22980 | 3045 | CGCCCCCTGTGTCCACCCAGTCCCGTCCAGGGGACTTTATGTGACCTTTGGCCTGGCTCCCATAGACTCCCATGTAAGCCTGCCTCGAGTAGGTGCTCCAGAGCCCTTTTGC         | 4  |
| wt-22980-23100 | 3046 | CCCCCTGGCGGCCAGCCCGGCCGCCCCAAACTTTGTCCAGATGTCCAGGGTCCCGAGGGTAGGGCCAGCCCGCTCCCGCCCTGTCCACTGCCCGGTCGCCCAAG                 | 12 |
| wt-23100-23220 | 3047 | GCCCCAAAGTAGAGGCTCAGGCCATCGCGCCCTGTCCACAGGCTGCCAAAGAGCCAGATCTAAGGCCGGGAGGGCAGCCCAAGCGGGTGCAGTAACAGGTAATCTCTGGTAGT        | 4  |
| wt-23220-23340 | 3048 | GATTTGGACCCGAAATCTGACACTTTAGAGCTTGGAGACTTTAAACTCTAAAAATCAAACCTTTAGAGGCGAATGGGGCCATTTGTCCACGCGGCATAATGGGGACCTAGG          | 4  |
| wt-23340-23460 | 3049 | CCTAAACCCCGAGGAAGCGGGTCTAGTGGCTGCGCTGCTGCTATCTTTAGAGGGGAAAGAGGAATAAGCCCCAGACAGGGGAGTGGGCTGTTTTGTGACTTCAACAAAGTCCAG       | 4  |
| wt-23460-23580 | 3050 | GGCCAAAGGGGTTGCGGTTGCTAGGCCACCTTCTCAGTCCAGCGGTTTACGTAAGCCAGACAGCAGCAATTTGCTAGTTAGGGAGGGGACCACTGCCCTGGTATAAAGTGGTCC       | 4  |
| wt-23580-23700 | 3051 | TGCAGTATTTCTGGTGCATCAGAGGCCAGGAGTCCACACAAATGTAAGAGGGGGTCTTACCTTCCCTAGCCCTCCGCCCTCCAAAGGACTCGGGCCAGTTTCTAACTTTCC          | 4  |
| wt-23700-23820 | 3052 | CCTTCCCTCCCTGCTTGGCCCTGCGCCCGGGGCCACCTTATCACCTGCTGACTCCGCCATCAAAGCTAGGGGAGACCAGTGAAGGCCCTGGACCAACCCGGCCCGGGCCCCC         | 8  |
| wt-23820-23940 | 3053 | GGTATCGGGCCAGAGGTAAGTGGACTTTAATTTTTTGTCTAAGCCCAACTCCACCACCCAGGCACACTACACACCCACCCGCTCAGGGTCCCTGGACAGCTCTAAGA              | 4  |
| wt-23940-24060 | 3054 | AGGCACCGTCCGCCAGTCTACCAGAGGGGGCCAAAGAACCCAGACAGTCCGTAGAAGGGTCTCGTCCAGCAAGAAGAGGAGGTGTAAGCGGTTACCTTCCAGGGTAAGTAACCTG      | 4  |
| wt-24060-24180 | 3055 | ACCTCTCAGGGCTCACATAAAGGAGGCTTAGTATACATGCTTCTGCTTTTACAGGAACCTGGGGGCTAGTCTGGTGGGATTAGGCTGCCTCAAGTTGCATCAGCCAGGGCTTCAT      | 4  |
| wt-24180-24300 | 3056 | GCCCTCTCAGTCCCTAGTCCCGGGCTTCCAGGCCCTCCGTCGCCCTCTCCAGAGACCCGGGCTCAGGCCCTGCCTCTCCTGTTACCTTTTAGAACCACAGCCTGGACACATGT        | 4  |
| wt-24300-24420 | 3057 | GCCAGAGCCTTGGCCTTAAGGCCCTCGGTCCCGTGGACCCCGGCTCAGCAACCTGCTGCTCCCTCTGCCACCCAGCCTCCCGCCCTCCCGTCCCGCTTCCGCTCTGATCC           | 8  |
| wt-24420-24540 | 3058 | TCCCCCGTCCCAAGTAGGGCCCTGCCCTTGCACCCAGTACCTGCCCTTTGGCCACGACCCCGGGCCAGGCCACTTAGACCCGGCAAGCCCATCCCTGAAGACCCAGCGG            | 8  |
| wt-24540-24660 | 3060 | GTCCCTCCGGGGGAGAGACAGCAGGACAGGCCCGCCCGCAGCTGGCCCGAGGAGGCCCGGAGTGGGCGGGTCCGCTGGGCTGGCTGGCCAGCCCGGGTCTGGGAGGTCTGGGGTGGCGAG | 12 |
| wt-24780-24900 | 3061 | CCTGCTGTCTCAGGAGGGGCTGGCTCCGCGGGTGGCCCTGGGGTAAGTCTGGGAGGCAGAGGTCGGCTAGGCCGGGGAAGTGGAGGGGATCGCCCGGCTCTGTTGGCAGAGT         | 8  |
| wt-24900-25020 | 3062 | CGGGGATCCTCTGAGACCTCCGGGCCGGAGGTCGCCCTCAGCCCCAGACAGACCCAGGGTCCAGGCAGGTCGGCATCTTCCAGGGGAGGAGGCTCACCACCAGGCC               | 8  |
| wt-25020-25140 | 3063 | CCCCAGACCCGGTCTCGGCCAGCCAGCCAGCCGCCCGCGCCTGGCGCTCTCGGGGCCAGCCCGGGGTTGGTCTGCCCTCTCTGTCTTCCAGAGAACAGGGACCTCG               | 8  |
| wt-25140-25260 | 3064 | GGCAGCCAGAGCCCTCGGGCCCGCTCCAGGCCCTCTGGTCTCCGCTCCCTTCCAGCCCGTTAAACCCAAAGATGTCTGAGGGGAGCCACCTCGGGCCAGGCCCAAG               | 8  |
| wt-25260-25380 | 3065 | TCCAGAGTCCAGGGGACCTCAGGTTCCCTCCCGGGTCCAGGCCAGCCGAGGACCCCGGGCCCGCCAGAGCCGGTTCCTCGCCCTTCCCGGGCTTCCAGAGCCCA                 | 12 |
| wt-25380-25500 | 3066 | GGATGCCCCAGAAGGGACCTAGGCTCCCTCTCTCCCTCCAGGCCGAGCCTCTCCCTCGCGGAGAGGGCCTTTTGGGCCCTCAAGTCCAGCCCAAGGAGCCGAGTGGC              | 8  |
| wt-25500-25620 | 3067 | CGGATCCCCCAGCCCTTCTCTGTCCCGTCTCTCTCCAACCTTCCCTCCACCTAGACCCAGCTTCTGGCTCCCGGGTCCACCAGCCAGCCGAGGGACCCGGCAG                  | 8  |
| wt-25620-25740 | 3068 | CCCGGGCAGTCCCTTCCCTTCCCTGGCCTCTCTTCCCGCCTCCACCCAGGCCCTCAGCTTCCCTCCCGGGTCCATCAGGCCGGCCGAGGGACCCCGCGGGCCGGTGG              | 12 |
| wt-25740-25860 | 3069 | TCAGTCCCCCTGCAGCCGCCAGTCTCTGCCTCCAGCAAGGGCCAGCCTTTCTCCCCCAGCTGAGGCCAGCTCCTGTGACTGTCTGTAAGTCCAGCCTCCACGCCCTG              | 8  |
| wt-25860-25980 | 3070 | CAGGTCCTCGGGCCAGCCTCGTCCACCTCCACAGGCTCCAGGACCCGCTGTCCAGCCGACCCCGGGCCCGCCCTGTGTCACCCAGTCCCGTCCAGGGGAGCTTTATGTGA           | 8  |
| wt-25980-26100 | 3071 | CCCTTGGCCTGGTCCCATAGACTCCATGTAAGCCTGCTCAGTGGTCCAGAGCCCTTTTGGCCCTGGCGGCCAGCCCGGGCCCGCCCAAACTTTGTCCA                       | 8  |
| wt-26100-26220 | 3072 | GATGTCCAGGGTCCCGAGGGTGGAGCCAGCCCTCCCGCCCTGTCCACTGCCCGGTCCCGCCAGAGCCCAAAAGTAGAGGCTCAGGCCATGCGCGCCTGTCCAGGCCCT             | 8  |
| wt-26220-26340 | 3073 | GCCAAAGAGCCAGATCTAAGGCCGGGAGAGGCAGCCCAAGCGGGTGCAGTAACAGGTAATCTCTGGTAGTATTGGACCCGAAATCTGACACTTTAGAGCTCTGGAGACTTTAA        | 4  |

|                |      |                                                                                                                          |    |
|----------------|------|--------------------------------------------------------------------------------------------------------------------------|----|
| wt-26340-26460 | 3074 | CTCTAAAAATCAAACCTTTAGAGGCGAATGGGGGCCATTTGTCCACGCGCGCATAATGGCGGACCTAGGCCTAAAACCCCGAGGAAGCGGGTCTATGTTGGCTGCGCTGCTGCTAT     | 4  |
| wt-26460-26580 | 3075 | CTTTAGAGGGGAAAAGAGGAATAAGCCCCACAGACAGGGAGTGGGCTTGTGTGACTTCACAAAGGTGACGGCCCAAGGGGTTGCGTGTGCTAGGCCACCTTCTCAGTCCAGCGCGT     | 4  |
| wt-26580-26700 | 3076 | TTACGTAAGCCAGACAGCAGCCAATTGTGCTTCTAGGGAGGGGACCCTGCCCTGGTATAAAGTGGTCTGCAGCTATTTCTGGTCCGATCAGAGCCGACAGGAGTCCACACAAATGT     | 4  |
| wt-26700-26820 | 3077 | AAGAGGGGGTCTTCTACCTCTCCCTAGCCCTCCGCCCCCTCAAGGACTCGGGCCAGTTTCTAACTTTTCCCTTCCCTCCCTCGTCTTCCCTCGCCCGGGGCCACCTTCATCACCG      | 4  |
| wt-26820-26940 | 3078 | TCGCTGACTCCGCCATCCAAGCCTAGGGGAGACCGAAGTGAAGGCCCTGGACCAACCCCGCCCGGGCCCGCCCGGTATCGGGCCAGAGGTAAGTGACTTAAATTTTTCTGTCAAGCCCA  | 4  |
| wt-26940-27060 | 3079 | ACACTCCACCACCCAGGCACACACACACCCACCCGCTCAGGGTCCCTCCGACAGCTCTAAGAGGCCCGGTGCGCCAGTCTACCAGAGGGGGCCAAAGAACCCAGACGA             | 4  |
| wt-27060-27180 | 3080 | GTCCGTAGAAGGGTCTCGTCCAGCAAGAAGGAGGTGGTAAGCCGTTACCTTCCAGGGTAAAGTAACTGACTCTCCAGGGTACACATAAAGGGAGGCTTAGTATACATGCTTCTTG      | 4  |
| wt-27180-27300 | 3081 | CTTTTACAGGAACCTGGGGGCTAGTCTGGGTGGGATTAGGCTGCCTCAAGTTGCATCAGCCAGGGCTTATGCTCCCTCCTCAGTTCCTTAGTCCCGGGGTTCCAGGCCCTCCGTC      | 4  |
| wt-27420-27540 | 3083 | CTCAGCAACCCCTGCTGCTCCCTCCTGCCACCCAGCCTCCCCCTCCCGTCCCGCTTCCGCTCCTGATCCTCCCGGGTCCCAAGTGGGCGCCCTGCCCCCTGCACCCAGTACTCTG      | 8  |
| wt-27540-27660 | 3084 | CCCCTTTGGCCACGCACCCCGGGCCAGGCCACCTTAGACCCGGCCAAAGCCCATCCTGAAGACCCAGCGGCCATTCTCTGGTAACGAGCAGAGAAGAAGTAGAGGCCCGCGGCCAT     | 8  |
| wt-27660-27780 | 3085 | TGGGCCCAGATTGAGAGACCAGTCCAGGGCCCGAGGTTGGAGCCAGCGGGCACCCGAGTCCAGCACCCGGTCCCTCCGGGGGACAGAGACAGGACAGGCCCCCGGCAGCTGCCCC      | 8  |
| wt-27780-27900 | 3086 | GAGGAGCGCCCGAGTGGGCGCGTCCGCTGGGCTGCCAGCCCGGGTCTGGAGGCTGAGGAGTCCAGGCTGCTCTCAGGAGGGGCTGAGTCCCGCGGGTGGCCCTGGGGTAA           | 12 |
| wt-27900-28020 | 3087 | GTCTGGGAGGCAGAGGGTCCGCCATAGGCCCGGGGAAGTGGAGGGGATCGCCCGGGTCTGTGTGGCAGAGTCCGGGCGATCCTCTGAGACCCCTCCGGGCCGACGGTCCGCTCAGCC    | 8  |
| wt-28020-28140 | 3088 | CCCCAGACAGACCCAGGGTCTCCAGGCAGGGTCCGGCATCTTCCAGGGGACAGGCTCACCACCACAGGCCCCCGAGACCGGGTCTCGGCCAGCCGAGCCGACCGGCCCGCGCTGG      | 8  |
| wt-28140-28260 | 3089 | CGCCTCTCCGGGGCCAGCCGCGGGGTTGGTTCTGCCCTCTCTGTCTCAGAGGAACAGGGACCTGGGACACCCAGAGCCCTCCGGCCCGCTCCAGGCCCCCTCCTGGTCTC           | 8  |
| wt-28260-28380 | 3090 | CGTCCCTCTGAGCCCGTAAACCCAAAGATGTCTGAGGGAGCCACCCTCGGGGCCAGGCCCCAGAGTCCAGAGGTCAGGGGACCTCAGGGTGCCTCCCGGGTCCAGGCCAG           | 8  |
| wt-28380-28500 | 3091 | CCGGAGGACCCCGGCAGCCCGGGCCAGAGCCCGGTTCTCCGCCCTTCCCGGGCTTCCAGAGCCAGGATGTCAGAGCCAGGATGTCAGAGCCAGAGGACCTAGCGCTCCCTCTCCCTCCAG | 8  |
| wt-28500-28620 | 3092 | GCCCCAGCCTCTCCCTCGCGGAGAGGGGCTCTTTGGGCCCTCAAGTCCAGCCCAACCCAGAGCCGAGTGGCCCGGATCCCCCACCGGCCCTTCTCTGTCCCTGCTCCTCCTCAA       | 8  |
| wt-28620-28740 | 3093 | CCTTCGCTCCACCCTAGACCCAGCTTCTGGCCTCCCGGGTCCACCAGGCCAGCCGAGGGACCCCGGACCCGGGCGAGTCCGCTTCCCTCTCCCTGGCTCTCTTCCCGCTCC          | 8  |
| wt-28740-28860 | 3094 | CACCCGAGCCCTCAGCTTGCTCCCAACCGGGTCCATCAGGCCGCGCGGAGGGACCCCGCGCCCGGTGTCACTCCCCCTGCAGCCGCCAGTCTCTGCCTCAGGCAAGGGCGCC         | 12 |
| wt-28860-28980 | 3095 | AGCTTTTCTCCCCCAGCCTGAGGCCAGTCTCCTGTGCACTGTCTGTAAGTCCAGCCTCCACGCGCTCCACGGCTCCCGGGCCAGCCTCGTCCACCCTCCCAAGGTTGGACAG         | 8  |
| wt-28980-29100 | 3096 | CCCTGTGCACCCGGGCACTCCCGCCGCTGTGTCCACCCAGTCCCGTCCAGGGGAACTTATGTAGATGTCAGAGGGTCCCGCAGATCCCATAGACTCCCATGTAGCCCTGCTCGAGT     | 8  |
| wt-29100-29220 | 3097 | AGGTGCCTCCAGAGCCCTTTTGGCCCTGCGCGCCAGCCGACCCCGGGCCGCCCAAACTTTGTCCAGATGTCAGAGGGTCCCGAGGGTGGAGCCAGCCCTCCCGCCCTG             | 8  |
| wt-29220-29340 | 3098 | TCCACTGCCCGGTCCCGCAGAAGCCCAAAAGTAGAGGCTCAGGCCATGCGGCCCTGTACCAGCCCTGCCAAAGAGCCAGATCTAAGGCCGGGAGAGGACCCCAAGCGGGT           | 8  |
| wt-29340-29460 | 3099 | CAGTAACAGGTAATCTCTGGTAGTATTGGACCCGAAATCTGACACTTTAGAGCTCTGGAGGACTTAAAACTCAAATAAATAAATTTAGAGGCGAATGGGCGCAATTTTGTCCCA       | 4  |
| wt-29460-29580 | 3100 | CGCGGCATAATGGCGGACCTAGGCCATAAAACCCCGAGGAAGCGGGTCTATGTTGGTGGCTGCTGCTATCTTTAGAGGGGAAAAGAGGAATAAGCCCCAGACAGGGGAGTGGGCTT     | 4  |
| wt-29580-29700 | 3101 | GTTTGTGACTTCAACAAAGTTCAGGGCCCAAGGGGTTCCGCTTGTAGGCCACCTTCTCAGTCCAGCGGTTTACGTAAGCCAGACAGCAATTTGCTAGGAGGGGGAC               | 4  |
| wt-29700-29820 | 3102 | ACTGCCCTGGTATAAAGTGGTCTGCACTATTTCTGGTCCGATCAGAGCCGAGGAGTCCACACAAATGTAAGAGGGGGTCTTCTACCTTCCCTAGCCCTCCCGCCCTCCAGGAC        | 4  |
| wt-29820-29940 | 3103 | TCGGGCCAGTTTCTAACTTTTCCCTTCCCTCCTCGTCTTCCCTGCGCCCGGGGCCACCTTATCACCCTGCTGACTCCGCCATCCAAGCCTAGGGGAGCCGAAGTGAAGGCCCT        | 4  |
| wt-29940-30060 | 3104 | GGACCAACCCGCGCCCGGGCCCGGATCGGGCCAGAGGTAAGTGGACTTAAATTTTCTGCTAAGCCAACTCCACCACACCCAGGCACACACTACACACACCCACCCGCTCAG          | 4  |
| wt-30060-30180 | 3105 | GGTCCCTCGGACAGCTCCTAAGAAGCCAGCGTCCGCCAGTCTACCAGAGGGGGCAAGAACCAGACAGTCCGTAGAAGGGTCTCGTCCAGCAAGAAGAGGAGGTGGTAAGCGGT        | 4  |
| wt-30180-30300 | 3106 | TCACCTTCAGGGTAAAGTAACTGACCTTCCAGGGCTCACATAAAGGAGGCTTAGTATACATGCTTCTTCTTTTACAGGAACCTGGGGGCTAGTCTGGTGGATTAGGCTGCCTC        | 4  |
| wt-30300-30420 | 3107 | AAGTTGCATCAGCCAGGGCTTATGCCCTCCTCAGTTCCTAGTCCCGGGCTTCCAGGCCCTCCGTCGCCGTCCTCCAGAGACCCGGGCTTCCAGGCCCTGCTCCTCTCCTGTTACCCCTT  | 4  |
| wt-30420-30540 | 3108 | TAGAACCACAGCCTGGACACATGTGCCAGACGCTTGGCCTCTAAGGCCCTCGGGTCCCGCTGGACCCCGGCCCTCAGCAACCCCTGCTGCTCCCTCCTGCCACCCAGCCTCCCGCCCTC  | 8  |
| wt-30540-30660 | 3109 | CCGTCCCGCTTCCGCTCCTGATCCTCCCGCGTCCCGAGTAGGGCCGCTGCCCGCTGCACCAGTACCTGCCCTCTTGGCCACGCACCCGGGCCAGGCCACCTTAGACCCGGCCAA       | 8  |
| wt-30660-30780 | 3110 | GCCCCATCCTGAAGACCCAGCGGCAATTTCTCTGTGAACGAGCAGAGAAGAAGTAGAGGCCCGCGGCCATTGGGCCAGATTGAGAGACCAGTCCAGGGGCCGAGGTTGGAGCCAGC     | 4  |
| wt-30780-30900 | 3111 | GGGACCCGAGGTCACAGCACCCTCCCTCCGGGGGCGAGACAGGACAGGGCCCGCCGAGTGGCCCGAGGAGGCGCCCGGAGTGGGGCCGCTCGGCTGGGCTGGCCGAGCCCGG         | 8  |
| wt-30900-31020 | 3112 | GTCTGGGAGGTTGGGGTGGCGAGCTGCTGTCTCAGGAGGGGCTGGCTCCCGCGGGTGGCCCTGGGGTAAAGTCTGGAGGACAGAGGGTGGCCCTAGGCCCGGGGAAAGTGAAGGGGGAT  | 12 |
| wt-31020-31140 | 3113 | CGCCCGGTCTGTGTGGCAGAGTCCGGGCGATCCTCTGAGACCCCTCCGGGCCGAGCGTCCGCTCAGCCCCCAGACAGACCCAGGGTCTCCAGGCAGGGTCCGGCATCTTACAGG       | 8  |
| wt-31140-31260 | 3114 | GCAGCAGGCTCACCACCAGGGCCCCAGACCCGGGCTCGGGCAGCCGAGCCGACCGGCCCGCGCTGGCGCTCCTCGGGCCAGCCCGGGGTTGGTTCTGCCCTCTCTGT              | 12 |
| wt-31260-31380 | 3115 | CCTTCAGAGGAACAGGGACCTCGGGCACCCAGAGCCCTCCGGCCCGCTCCAGGCCCTCCTGGTCTCCGCTCCCTCTGAGCCCGTTAAACCCAAAGAAATGCTGAGGGGAGCC         | 8  |
| wt-31380-31500 | 3116 | ACCCTCGGGGCCAGGCCAGAGTCCAGAGGTCAGGGGACCTCAGGGTGCCTCCCGGGTCCAGGCCAGCCGAGGGACCCCGGCAGCCCGGGCGGCCAGAGGCCGTTCTCCGC           | 12 |
| wt-31500-31620 | 3117 | CCCTTCCCGGGCTTCCAGAGCCAGGATGTCGCCCAAGGGACCTTAGGGCTCCCTCTCCCTCCAGGCCAGCCCTTCCCTCGCGGAGAGGGGCTCTTTGGGCCCTCAAGTC            | 8  |
| wt-31620-31740 | 3118 | CAGCCCCACCCAGACCCGAGTGGCCGGATCCCCCACCAGCCCTTCTCTGTCCCGCTGCTCCTTCAACCTTCCCTCAGCCCTAGACCCAGCTTCTGGCCCTCCCGGGTCCACCA        | 8  |
| wt-31740-31860 | 3119 | GGCAGCCGAGGACCCCGCAGCCCGGGGAGTCCGCTTCCCTCCTCCCTGCGCTCCTTCCCGCTCCACCCAGCCCGCTCAGCTTGCCTCCCAACCGGGTCCATCAGGCCGCGC          | 12 |
| wt-31860-31980 | 3120 | CGGAGGGACCCCGCGCGCCGGTGTCACTCCCGCTGCAGCCGCCAGTCTGCTCCAGGCAAGGGCGCCAGCTTTTCTCCCGCCAGCCTGAGGCCAGTCTCCTGTGCACTGTCTGT        | 8  |
| wt-31980-32100 | 3121 | AAAGTCCAGCCTCCACGCCCTCCACGGCTCCCGGGCCAGCCTCCAGCCCTCCACCCAGTGGACAGGCGCTGTCCACCCCGGGCCATCCCCCGCCCTGTGTCCACCCAGTC           | 8  |
| wt-32100-32220 | 3122 | CCGTCCAGGGGGACTTATGTACCTTGGGCTGGCTCCCATAGCTCCATGAAAGCTGCTCGAGTGGTGCCTCCAGAGCCCTTTTGGCCCTCCAGCCCGCCAGCCCGAC               | 8  |
| wt-32220-32340 | 3123 | CCGGGCGCCCAAACTTTGTCCAGATGTCCAGGGTCCCGAGGTTGAGGCCAGCCCGCTCCCGCCCTTCCACTGCCCGGGTCCCGCAGAAGCCCAAAAGTAGAGGCTCAGGC           | 8  |
| wt-32340-32460 | 3124 | CATGCGCGCCTGTACCAGCCCTGCCAAAGAGCCAGATCTAAGGCCGGGAGAGGACCCCAAGCGGGTGCAGTAACAGGTAATCTCTGGTAGTATTGGACCCGAAATCTGACACT        | 4  |
| wt-32460-32580 | 3125 | TTAGAGCTCTGGAGACTTAAAACTCTAAAAATCAAACCTTTAGAGGCGAATGGGGCCATTTTGTCCCAACCGCGCATAATGGCGGACCTAGGCCTAAAACCCCGAGGAAGCGGGT      | 4  |

|                |      |                                                                                                                        |    |
|----------------|------|------------------------------------------------------------------------------------------------------------------------|----|
| wt-32580-32700 | 3126 | TATGGTTGGCTGCGTGTCTATCTTTAGAGGGGAAAAGAGGAATAAGCCCCAGACAGGGGAGTGGGCTGTTTGTGACTTACCAAAGGTGACGGGCCAAGGGGTTGCGGTTGCTA      | 4  |
| wt-32700-32820 | 3127 | GGCCACCTTCTCAGTCCAGCGCGTTTACGTAAGCCAGACAGCAGCCAATTGTGACTTCTAGGGAGGGGGACCCTGCCCTGGTATAAAGTGGTCTGCAGCTATTCTGGTCGCATCAG   | 4  |
| wt-32820-32940 | 3128 | AGCGCCAGGAGTCCACACAATGTAAGAGGGGCTTCTACCTCTCCCTAGCCCTCCGCCCCCTCAAGGACTCGGGCCAGTTTCTAACTTTTCCCTTCCCTCCCTCGTCTTGCCCTG     | 4  |
| wt-32940-33060 | 3129 | CGCCCGGGGCCACCTTTCATCACCGTGCCTGACTCCGCCATCCAGGCTAGGGGAGACCAGAGTGAAGGCCCTGACCAACCCGCGCCGGCCCGCCGGTATCGGGCCAGAGGTAAGTGGA | 8  |
| wt-33060-33180 | 3130 | CTTTAATTTTTTCTGCTAAGCCCAACACTCCACCACCCAGGCACACACTACACACACCACCCGCTCAGGGTCCCTCGGACAGCTCTAAGAAGGCACCCGGTCCGCCAGTCTAC      | 4  |
| wt-33180-33300 | 3131 | AGAGGGGCCAAGAACCAGCAGTCCCTAGAAAGGTCCTCGTCCAGCAAGAAGAGGAGTGTGAAGGTTACCTTACAGGGTAAGTAACTGACTCTCCAGGGTCCATATAAGG          | 4  |
| wt-33300-33420 | 3132 | GAGGCTTAGTATACATGCTTCTGCTTTTTCACAGGAACCCGAGTGGGCTAGTCTGGGTTAGGCTGCCTCAAAGTGCATCAGCCAGGGCTTACAGCTCCCTAGTCTCCATGTC       | 4  |
| wt-33420-33540 | 3133 | GGGCTTACAGGCCCTCCGTCCTCCGCTCCTCAGAGACCCGGGCTTACGGCCCTGCCTCTCTGTTACCCTTTTAGAACCACAGCCTGGACACATGTGCCAGACGCTTGGCCTTAAGGC  | 4  |
| wt-33540-33660 | 3134 | CCTCGGGTCCCTCGACCCCGGCTCAGCAACCCCTGCTGCTCCCTCTGCCACCCAGCCTCCCGCTCCCGCTCCCGCTTCGCTCCTGATCCTCCCGCGTCCCGAGTAGGGCCGC       | 12 |
| wt-33660-33780 | 3135 | CTGCCCTCGACCCAGTACCTGCCCTCTTGGCCACGCACCCCGGGCCAGGCCACCTTAGACCCGGCCAAAGCCCATCCCTGAAGACCAGCGGCCATTCTCTGGTAAACGAGCAGA     | 8  |
| wt-33780-33900 | 3136 | GAAGAAGTAGAGCCCGCGCCATTGGCCAGATTGAGAGACCAGTCCAGGGGCGCCAGGTTGGAGCCAGCGGGCACCAGGTTCCAGCACCCTGGTCCCTCCGGGGGAGAGACAGG      | 4  |
| wt-33900-34020 | 3137 | CAGGCCCCCGGCAGCTGGCCCGAGGAGCCGCGAGTGGGGCTGGGCTGGGCTGGCCAGCCCGGGTCTGGGAGGCTGGGGTCCGCGCTGCTCAGGAGGGCCCTG                 | 12 |
| wt-34020-34140 | 3138 | CTCCGCGGGTGGCCCTGGGGTAAGTCTGGGAGGCAGAGGTCGGCCTAGGCCCGGGGAAGTGGAGGGGATCGCCCGGGTCTCTGTTGGCAGAGTCCGGGCGATCCTCTGAGACCTCC   | 8  |
| wt-34140-34260 | 3139 | GGGCCCGGACGGTCCGCTCAGCCCCCAGACAGACCCAGGGTCTCCAGGAGGGTCCGGCATCTTACAGGGCAGCAGGCTCACCACCAGGCCCCCCAGACCCGGGTCTCGGCCAGC     | 8  |
| wt-34260-34380 | 3140 | CGAGCCGACCGGGCCCGCGCTGGCGCTCCTCGGGCCAGCGCCGGGGTGGTCTGCCCTCTCTCTGCTTACAGGAACCCAGGGACCTCGGGCACCCAGAGCCCTCGGGCCC          | 12 |
| wt-34380-34500 | 3141 | GCCTCAGGCGCCCTCCTGGTCTCCGCTCCCTCTGAGCCCCGTTAAACCCAAAGAAATGCTGAGGGGAGCCACCTCGGGGCCAGGCCCCAGAGTCCAGAGGTCCAGGGCACCTCAGG   | 8  |
| wt-34500-34620 | 3142 | GTGCCTCCCGGGTCCAGGCCAGCCGGAGGGACCCCGCAGCCCGGGCCAGCCAGAGGCGGTTCTCCCGCTTCCCGGGCTTACAGGCCAGGATGTCGCCAGAAAGGGACCTA         | 12 |
| wt-34620-34740 | 3143 | GGCGTCCCTCTCCCTCCAGGCCGAGCCTCTCCCTCGCGGAGAGGGGCTCTTTGGGCCCTCAAAGTCCAGCCACCAGAGCCAGTGGCCGGATCCCGCCAGCGCCCTTCT           | 8  |
| wt-34740-34860 | 3144 | CTCTGTCCTCTGCTCTCTCCAACCTTCGCTCCACCTAGACCCAGCTTCTGGCTCCCGGGTCCACCAGGCCAGCCGGAGGACCCCGGCAGCCGGGCGAGTCCCTTCCCTCTC        | 8  |
| wt-34860-34980 | 3145 | CCCTGGCTCTCCTTCCCGCTCCACCCGAGCCCTCAGCTTCCCTCCACCCGGGTCATCAGGCCGGCCGAGGGACCCCGCGGGCCGGTGTCACTCCCGCTGACGGCCCGCAG         | 12 |
| wt-34980-35100 | 3146 | TCTCTGCTCCAGGCAAGGGCGCCAGCTTTTCTCCCGCAGCCTGAGGCCAGTCTCCTGTGCACTGTCTGTAAGTCCAGCCTCCACGCCCCGTCACGGCTCCCGGGCCAGCCTCGT     | 8  |
| wt-35100-35220 | 3147 | GACCCCTCCCGCAGGTGGACAGGCCCTGTGTCACCCGGGGATCCCGGGCCCGCTGTTCCAGCCAGTCCCGTCCAGGGGGACTTTATGTGACCCCTGGGCTGGCTCCCATAGA       | 8  |
| wt-35220-35340 | 3148 | CTCCCATGTAAGCCTGCCTCAGTAGTGGTCCAGACCCCTTTTGGCCCTGGCGCCAGCCGACCCCGGGCGCCCCAACTTTGTCCAGATGTCAGGGGTCCCGAGGGTG             | 8  |
| wt-35340-35460 | 3149 | AGGCCAGCCCTCTCGCCAAGCTGCTTTGATTCTGGGATATTTTGGGAATGGTGAACCTTCTCCCTGTATTTGCTATTCAATCAACCTGATCCCGTCTCATACCTCCA            | 4  |
| wt-35460-35580 | 3150 | CTTACAACCAAGCCACTACGGCCAGTCCCGGGCTCCCGCTCGGGTAAGTGCCTTTTTCATTTTACGCCCCAGCCCTCCTCTATAAGTCTAGGCAAACCTCAATCACCAGCCACT     | 4  |
| wt-35580-35700 | 3151 | CCAATGTAGTCTTAGAGAGTGGCTGCTACGCATTAGAGACCATTGAGCCACCACAGTAACCCAGCCAGCCCAATCTGTCTACATAGAAGAAGAAGAGGATGAAGACTAAGTCACA    | 4  |
| wt-35700-35820 | 3152 | GGCTTAGCCAGGTGATTTGTAAATTCAGTTTATTTACTTCTTCCAATCAAGCTTTCCAGCCTCCGCTTGTAGGTCTAGTTATGGGTTTCCATGGGGACTTAGTATCGTTCTA       | 4  |
| wt-35820-35940 | 3153 | TTAGATTAACGTGCAAGACGCTAAACTTAAACCAAGGTGAGCAAGGGACGCGTGTATCCAGGCTGCCACCTCAGGATTTCCCGCCAAATCCTCTACCTCTCTTTATGCCATGT      | 4  |
| wt-35940-36060 | 3154 | GTGTTGTTGGCTTGTGTAGTGTATGTAATGCGTGGCCGAGTGGCAGCCTGTTATAGATGTGCAGTACCCTTAATGTTAGGTCTGCTTTAGGGTCCAGGTGGCGCAATCTAG        | 4  |
| wt-36060-36180 | 3155 | GATTAATTCACCTGTATCCCTTTCCCTCCACCCGAGTAACCCAGCACTGGCGTGTGACGTGGTGTAAAGTTTTGCTGAACTGTGGTGGGAGGTACATGCCAACACCTCTAAGC      | 4  |
| wt-36180-36300 | 3156 | ACCCGCGCTGTGTTTTGCTTTATCTGCCGCATCATGCCTACATTTCTATCTGCGTTACATGGGGGACAAACATATCATCTAATTGTTGACACGGATAGTCTTGAACCCGTCACCT    | 4  |
| wt-36300-36420 | 3157 | CAGTAATCCCTCGAATCCCTACCAGAACAACTGTGACAGCTCCATTAATCCACTAAACATCTTTGTTGGGAAAAACAGGGGTGCCCCACCCTCCACCACCCCGCCACCAC         | 4  |
| wt-36420-36660 | 3158 | AGCCATCACCTTTGATAGGGATCCGCTAGGATATGACGTGGGCATGGACCTCTAGCATCTGCTATGCGAATGCTTTGGATGGCTAAATTAATGTAAGACAATCAGGGGTGACCGG    | 4  |
| wt-36660-36780 | 3159 | GCCTATTTTGGCCAAAGGCCACAAACAGCCCTCAGGCCAGGTTGGTCCAGCCACATGTCCCGCTCTACGCCGACAGCACCACCAATTTGTACCTCTGTACAAACCGAGGCTTA      | 4  |
| wt-36780-36900 | 3160 | CCCTCCACAACCACTCATGATGCCACCAAGGCCCTACCCCTCCTACCCTCTGCCACCTGCAACACTAAGGTTGCCACCAAGGCCACCCGTCCTACCCTCTGCCACCCACACCACTAC  | 4  |
| wt-36900-37020 | 3161 | TCACGGTACTACAAAGGCCCTACCAACTTCAACCCACACCATCACCACAGCATGCATCCCTGTCTTGCATGTGCCAGACCAATCAATGCACCCCTTACTCATCAAAGCACCCCAA    | 4  |
| wt-37020-37140 | 3162 | ATGATCCAGATAGTCCAGAACCAGGTCCTCCGACTGTATTTTAAACATCCACCTATGCCATTACCCCTCACAATTGCCACCACAGCAGCACCAGCACGCCACTCCAGGGGTCA      | 4  |
| wt-37140-37260 | 3163 | TCAACGACCAACAATTACATCATCTACCTCGGGCCACCATGGTGGCCACCCATCTGCGACCCCGCACAACCTCTAAGACTCAAGGCCAGAGCCGGGACAGAGCAGGGGGAGGGGCA   | 4  |
| wt-37260-37380 | 3164 | GGGGCAGGGGAGGGGCAAGGGCAAGGGCAAGTCCAGGGACAAGCAACGCAAGCCCGTGGACCTTGGAGACCAGAGCCAAACACCTCCAGTCTAGCATGCCTGAATAGTCCAGTCC    | 4  |
| wt-37380-37500 | 3165 | TGGTCTTTCATCAGGGACAAGGGCTGGGGACTCACAACCTCTGGCCATCCAATGCCGCCCGCTTTGTAGAAATTCACACAGGCAACCCCTAAGCTTTCACCAATACATGAACCGG    | 4  |
| wt-37500-37620 | 3166 | AGTCCATAATAGCCAGAGGCTCCATTCTCTTCCCGATGATTGGTATCCTCCATCTATAGACCCCGCAGACTTAGACGAAAGTGGGATTACATTTTGGAGACAACAGAAATCTCTA    | 4  |
| wt-37620-37740 | 3167 | GCTCAGATGAAGATTATGTGGAGGGACCCAGTAAAGACCTCGCCCTCCATCCAGTAAACCCCTGGCCCTCCAGCAACCAATGTATCCCAAATAAATGTTACTTCTTTGCTCTTA     | 4  |
| wt-37740-37860 | 3168 | ACCATTGACAGCCCTGATTTCTAATCAATTAACCAAGGGAAAGGTTTAGCTATTCCACCAACACGACCCCAAGGAAGGCTTGCACAAATTTGGTCCCTGCTCTCAGACTTTGCCAGC  | 4  |
| wt-37860-37980 | 3169 | AACTTATAGCATGGTAGGCAGCTCAACTCGGCCGCTTACTGCCAGCCTACTCTCACTCCAGTCCATGTTGCACTCCTATGCATTTCTGCCCTCCCACTTTTACCCAGTCCCA       | 4  |
| wt-37980-38100 | 3170 | ACCCAAAACACACACAACACATAGAATTGTTAGTTAAACAGTTTATTGATAGTGGCTGCTTTAGCTAAATTTGTAATGCTCTCGTTGCCAAAACCTGTTGTAAGGGCCGGCACCC    | 4  |
| wt-38100-38220 | 3171 | GCAACATGGGGAAAACATAAACCGCCGCATCCCATGGGGAGGTAAGAGCGGTTGACATGATAGTGAAGTGAAGAAGCATGGCGAAGTAGACAGGTTACTTTAGAGTGTAGTGTAC    | 4  |
| wt-38220-38340 | 3172 | AGGGCCGGGCGCAACAGTGCACCAACCCGGGCTGAGCATTTCCATGGGACGAGGACACTGCACCTACCCAGGTCCTGGGGCAGCCGGGTTCTGGCGCTCCGGGCGCAGCCGGG      | 8  |
| wt-38340-38460 | 3173 | GGCCGCGGTGGTCCGCTGGCGCTGCCCGCTCCGGGTGGGGGTGGCCCGCTGGCCAGCTGCGCCGCGCAGGCTCTGGGGCAGCCGGGTTCTGGCGTCCGGGTCGGGGCAG          | 4  |
| wt-38460-38580 | 3174 | CCGGGCGCGCGGTTGGTCCGCTGGCCGCTGCCCGCTCCGGTGGGGGTGGCCCGCTGGGCACCGCTGCGCCGCGCCAGGTCCTGGGCGAGCCGGGTTCTGGCGTCCGGG           | 12 |
| wt-38580-38700 | 3175 | GGCAGCCGGGCGCGCGGTTGGTCCGCTGGCCGCTGCCCGCTCCGGTGGGGGTGGCCCGCTGGGCACCGCTGCGCCGCGCCAGGTCCTGGGCGAGCCGGGTTCTGGCGCT          | 12 |
| wt-38700-38820 | 3176 | CCGGGGCAGCCGGGCGCGCGGTTGGTCCGCTGGCCGCTGCCCGCTCCGGTGGGGGTGGCCCGCTGGGCACCGCTGCGCCGCGCCAGGTCCTGGGGCAGCCGGGTTCTG           | 12 |



|                |      |                                                                                                                          |    |
|----------------|------|--------------------------------------------------------------------------------------------------------------------------|----|
| wt-38820-38940 | 3177 | GCGCTCCGGGGGACGCGGGGGCGCCGGTGGGTCCGCTGGGCCGCTGCCCGCTCCGGGTGGGGGTGGCCCGCTGGGCACCGCTGCGCCGCGCCAGGTCTGGGGAGCCGGGGT          | 16 |
| wt-38940-39060 | 3178 | TCCTGGCGCTCCGGGGGACGCGGGCGCGCCGGTGGGTCCGCTGGGCCGCTGCCCGCTCCGGGTGGGGGTGGCCCGCTGGGCACCGCTGCGCCGCGCCAGGTCTGGGGACGCC         | 12 |
| wt-39060-39180 | 3179 | GGGGTTCCTGGCGCTCCGGGGGACGCGGGGGCGCCGGTGGGTCCGCTGGGCCGCTGCCCGCTCCGGGTGGGGGTGGCCCGCTGGGCACCGCTGCGCCGCGCCAGGTCTGGGG         | 12 |
| wt-39180-39300 | 3180 | CAGCCGGGGTTCCTGGCGCTCCGGGGGACGCGGGGGCGCCGGTGGGTCCGCTGGGCCGCTGCCCGCTCCGGGTGGGGGTGGCCCGCTGGGCACCGCTGCGCCGCGCCAGGTCC        | 12 |
| wt-39300-39420 | 3181 | TGGGGCAGCCGGGGTTCCTGGCGCTCCGGGGGACGCGGGGGCGCCGGTGGGTCCGCTGGGCCGCTGCCCGCTCCGGGTGGGGGTGGCCCGCTGGGCACCGCTGCGCCGCGCCCA       | 12 |
| wt-39420-39540 | 3182 | GGTCTGGGGCAGCCGGGGTTCCTGGCGCTCCGGGGGACGCGGGGGCGCCGGTGGGTCCGCTGGGCCGCTGCCCGCTCCGGGTGGGGGTGGCCCGCTGGGCACCGCTGCGCCGCG       | 12 |
| wt-39540-39660 | 3183 | CGCCAGTCTGGGGGACCGGGTTCCTGGCGCTCCGGGGGACGCGGGGGCGCCGGTGGGTCCGCTGGGCCGCTGCCCGCTCCGGGTGGGGGTGGCCCGCTGGGCACCGCTGCG          | 12 |
| wt-39660-39780 | 3184 | GCCCGCGCCAGGTCTGGGGCAGCCGGGGTTCCTGGCGCTCCGGGGGACGCGGGGGCGCCGGTGGGTCCGCTGGGCCGCTGCCCGCTCCGGGTGGGGGTGGCCCGCTGGGCACC        | 12 |
| wt-39780-39900 | 3185 | GCTGCGCCGCGCCAGGTCTGGGGCAGCCGGGGTTCCTGGCGCTCCAGTGCACCTGGAATGCAGGGTGGGGCGTGGTCCCTGGACCCAGCCCGCGATCCCTCCCCAGGGCGTA         | 12 |
| wt-39900-40020 | 3186 | CCCGCTTGCCTGTTCTGGGGCTCCTCTGGGGTCCGCTGCATCCCGGTTAGGGTTCAATGGGCGTGGTCCGCTTGTCTGCTGGCCCGTACGCCTGGATTGCCGGCTGGGGGTGG        | 8  |
| wt-40020-40140 | 3187 | GGTCCCGGACGCCCCCTCCTGCTCCACCCGGTTCCTCCCCAGGCGCTGCCCGCTTGCCTGGTCTGGAGCTCATCCGGGATGCTGCATCCGTAAGTCCGACCTGGTGGGTGGC         | 8  |
| wt-40140-40260 | 3188 | GGTCCGCTGGCCCAACCCTGGGGTTCCTGGCGCTCCGGGGGACGCGGGGGCGCCGGTGGGTCCGCTGGGCCGCTGCCCGCTCCGGGTGGGGGTGGCCCGCTGGGCACCGCTGCG       | 12 |
| wt-40260-40380 | 3189 | GGTCCCATGGCACAGCCTAGGGTCCAGGGGGGACGCGGGGGCGCCAGCGCCCGCTTACGGGGAGGACCGCGCCGAGCCAGCCAGGGGGCGCGGGGGTGGGGGTGGCGTCCCA         | 12 |
| wt-40380-40500 | 3190 | GGCCGGACCTGGTGCAGGCAGGGACCCCGCCAGCCGCTTATGGGGGGGAGCGCCGCAAGGACGCGGGCGCGCTGGAGGTGTGCACCCCGAGCGTCTGGAGACGCTGG              | 12 |
| wt-40500-40620 | 3191 | CGAGCCGGCCGCTCGCCTCTTTATCTCTTTTTGGGGTCTCTGTGAATACTTTAAGTTTGTCTCAGGAGTGGGGGCTTCTATTGGTTAATCAGGTGTGCATTTAGCCGTT            | 4  |
| wt-40620-40740 | 3192 | GGGTTTCATTAAGGTGTGCACAGGTGGGTGGTACCTGGAGGTATTTCTATTGGGATAACGAGAGGAGGAGGGGCTAGAGGTCCGCGAGATTTGGGGTAGCCGAGCCTCAGGAGGGTC    | 4  |
| wt-40740-40860 | 3193 | CCCTCCATAGGGTTGAACCAGGAGGGGGAGGATTGGCTCCGCCCGATATACCTAGTGGGTGGAGCCTAGAGGTAGGTATCCATAGGGTTCCATTATCTCGAGGTATCCTAAGCTCCG    | 4  |
| wt-40860-40980 | 3194 | CCCCTATATACAGGTGGGTGGAGTAGGTAGGATTACAGTAGGTTCTACTGGGGTACCCCTACCTACCTTAAGTGCACCACCTTCTCCTTCCGTTTTAATGGTAGAATAACC          | 4  |
| wt-40980-41100 | 3195 | TATAGGTTATAACCTAGTGGTGAATAGGTTATTCAGCTGGGTATATACCTATAGGTATATAGAAGTACAGGAAAGGAAACCTATAGTGAATCCCTCCCGCCCTACCCCGCTC         | 4  |
| wt-41100-41220 | 3196 | CCTTACGGTTCGCTGAGCCATCCCGACCCAGCACCAGGGGGTACGTTGGACCCCGCTGCCTTACTGACTTGTACACCTTGTGCACATTTGGTCAGCTGACCCGATGCTCCGCACTTC    | 4  |
| wt-41220-41340 | 3197 | TGGGTGCATGACCTGGCGTGTCCCGTGGACAATGTCCTCCAGCGTGGTGGTGCCTTTGGGATGCATCACTTTGAGCCACTAAGCCCGGTTGCTGCCTTGCCTGCCTCACC           | 4  |
| wt-41340-41460 | 3198 | ATGACACACTAAGCCCTGCTAATCCATGAGCCCGCTTTAGGAAAGCACCAGCTCCCGGGAGCGAAGGGGACTTGGGGTATTTCCTATGTGGGGTGGAAATATGAGCAAGATAAG       | 4  |
| wt-41460-41580 | 3199 | GACGGCTCCTTATAACCTGATCAGCCCGAGTTGCCTGTTTCATCACTAACCCCGGGCTGAAGAGTTGACAAGAAGGGTCAAGTTTTCGCTGTGTGTTGAAGGGCAGGGCTGTT        | 4  |
| wt-41580-41700 | 3200 | GGGTGCATCGAACGGCTTACCTCGGTAAGTGTGTTGCCATTAAGGTTGGGATTAGGTTTAGCCCTTTAGCTGCCATTTGAACCGGGGTGCAGATGCAGGTCTCCGGTGGG           | 4  |
| wt-41700-41820 | 3201 | CAGGCAGTACGAGATGTCACGTTGTGTTCTTCCACCCCTGTCTGGCTGTGGCAATGCGACCTCATAGAGTTGTGTTTACAGTCTGTGTCTGTTTTGCGGTGGGTTATTT            | 4  |
| wt-41820-41940 | 3202 | CTTCCCTCAGTGTGGCAGCTTATTTCCAGTTCCTACGTAAGTGGGCGCTGTGGACACCTGAGGGAGCGGGCTTGGTGGGTATGTGTTGGAATGCTCCACCCCTCAATTTTCGCTT      | 4  |
| wt-41940-42060 | 3203 | GCCTTCTCCCTTGTAACTGATAGCATAGCCTTAGGTTTCCTTGTAGGTTCTTTGGTGTGTTGGTTCAGTGGTCTAACTTGAATTTTTGGTTTTCTAGTTCCTCTTAATTA           | 4  |
| wt-42060-42180 | 3204 | CATTTGCGCAGATCTTGTAGAGCAAGTAGGCTTATTAACAAAGGAGATACTGTTAGCCCTGTGTATACGGGACAGCTGTCGTGCATGGAATGTTACCCCTGCATCCTGTGTTGGAGCTA  | 4  |
| wt-42180-42300 | 3205 | GCAGCAAGAGAAACACCTCCTCCGCTTTCGCGCAGGAGACTGTAGTCTCGCTTATCATGTGTTGCTTGGAGGATAAATGAACGAAATTCAGAGACATTTACAGAACTTGAACAGA      | 4  |
| wt-42300-42420 | 3206 | TTTATAACACACACCGAACATGTGGATCTGGATTTTAACTCAGTATTTTAGAGATATTTACCCGTGGAGACCCAAAGCCTTGGGCGCGCTTGGCCTGGATGGCCTGGTGCATGCC      | 4  |
| wt-42420-42540 | 3207 | TGCAGGACATGTGTTGTAACCACTACTCCTTACTATGTTGGACCTGTGAGTTCGTTGGGATGTAGAAGCCAGCGAAGCCCTGGATGGTGGATTCAACAGGGGGCTGGTCT           | 4  |
| wt-42540-42660 | 3208 | ACATTAATTGAAGACAACATTCCTGGATCCAGAAGGTTTAGCTGGACTTTGTTTCTGCTGGACTGACTTTGAGTCTGTAGTATATATGATGTTATTTATCTCCAGAGGAAGACAC      | 4  |
| wt-42660-42780 | 3209 | TAATCTATACATTTTCTCAGCACTTATATGAATCAGGGTCAATGGGCTCGCGGGAAGTACAGCAAGTGGATATAGGCAAGGGTACACAGTCCCGATGCATTAATTAACCAAAAC       | 4  |
| wt-42780-42900 | 3210 | AGTGGTCTGAGTTTTAGGCCGGCCATGGGGGCTTACAAGAATAACATGCCAATGACCCGGCCCACTTTAAATTTCTGTTGCAGCAGATAGCTGATACCCAATGTTATCTTTTGGCGG    | 4  |
| wt-42900-43020 | 3211 | AGAAATTGAAAGTCTGCGCATATCTACAATGGGTGCTAGGTGGGATATACCGCTGTGGTGTCTAACGGGAAGTGTGAAGCACACACGTAATTTGCAAGCGGTGCTTACGCTCT        | 4  |
| wt-43020-43140 | 3212 | TCGTTAAATAACACAAGGACAAGTAAAGAAATAACTGAGGTGAGTGTGGGAAGATGGGAATACTATGTGTTATGTTAACGGGTGAGAGCCTACTGACGCCAGACTCGGGGGG         | 4  |
| wt-43140-43260 | 3213 | AGGAGGAAATGGTAAGATTACTCTACTTATCTTTTTGACACTACATTAAGTGTATGTAACAATGTTGCTTATTTTCATGTTCAATAAACGCTATGTTAATGATGAAGAACCTG        | 4  |
| wt-43260-43380 | 3214 | TGTTCTTTGGAAGTGGGCCAATGGGGTAGTAGGTTTTGGGAGGTGCCGTGTAGATATTTCAACTGCCACAGACCCCAATTTTGTCCACCTGTTACACACATCTAGTCTCGCATCCA     | 4  |
| wt-43380-43500 | 3215 | GTGGGCCAGGTGTCTACCATGGCTCTTCTAGGTGGATACCACAGTCCAGGCCCAAGGCTACCGTCTAATACCTCCTCATGTCCACCCCGCCCTGTGTTACTGTCCGCTGATTA        | 4  |
| wt-43500-43620 | 3216 | TCCTGGCTTAGCAGCTCCAAGTTTACAAGAGTCCATTGCCCTGCCCTTGGTCCAAGTCTCGCGGTTTTGAGCAGCTGTTGTAGCCTGCCCAAGTTTCCAGGTTTCCCCAT           | 4  |
| wt-43620-43740 | 3217 | GCCTCCACCCGTTAACCCAATAGCATGACAGCCAATCCAACAGGCAAGTTTAAAGATTAAAAGCAACTACTGTTATTTCCAAAATGAGCTGGGATATAGTTGATGATCTGTAGGC      | 4  |
| wt-43740-43860 | 3218 | GCAGCTCATCCCCACATCCAGGTCCTTGTAGGCTCGTAGGTCATCTTCGTCGACATTGACAGCCTTCTCATATACCGTGTCTCTGGGGTACCTTTATACAGAAAGGCGTCCCCTA      | 4  |
| wt-43860-43980 | 3219 | CTAGGTCCAGGCCAGCTCGTAGGTGGGCTATGTTTTCACATAACAGTTTCAAGCAGTCTCTGGGATGTGAAGGAGGTTGCCCTGGAGCAGGAGATGCATGATTAGGCGCCTTTTTC     | 4  |
| wt-43980-44100 | 3220 | CATTTGTGCTGAAGATGGGGCAGATGGTCCACAAAAGTGTCCGGTGACCAGGTAAGCGTAGAGAAGGCTGGGTGGGAAAAGTCCAGCCTTTACTGCACTGGGAGAGCTGCTGAGCAGAG  | 4  |
| wt-44100-44220 | 3221 | ACACATAGAAGTCTTGTGGTATTATCTTGTGGACATTGTTGAAGAAGGAGAGCTGGTGGAGCTAAACTCCTGAGGCACATGAACCTGGGACCTATTGATGCAGATCTCGAGTGAG      | 4  |
| wt-44220-44340 | 3222 | ACCCAGAGTCAAGGCTGTGGCCGAAGGGAGACAGGCGAAGGCAAGCGCCCGGGGGAGAGATGCACAGTGCAGTGGGAGAAACACGGCCTGTGAGACATGTATGGGGTGTTCATCTCAC   | 4  |
| wt-44340-44460 | 3223 | GCAGAAAATCTTTGCCAGCTCAAAGTTGGCAGAGATCCCCTGAAGAAAGTCCCGTAGTGAAGAAATGGGATCTGTCTACACCATGTCTGGTGTGCCGGGAACATATTGATCGGGCCACAC | 4  |
| wt-44460-44580 | 3224 | TGCCAACCTTTCCATTTCCAGCTCTGAGGAGATTTCCACACTTGACACCGACTTACCGTATCGCCGAGCGCTTTGAGGCCCTGTAGTTTTCTGTGGTGGGAGCTGCAATGAGC        | 4  |
| wt-44580-44700 | 3225 | GGCGCAATGCGGGATCTCGCGTCTGTTGGCGTGAATTTACGCGATCTGGGTGACCGGGGACCTCGGGTTTACTTTTACACAGTACGCTGGGAAAGTTGATAGGACTGTACCAGGT      | 4  |
| wt-44700-44820 | 3226 | CAAGGCCGTGGATGCGCAGGACACGCTCCAGTTCCTTAGTGACATCCACGAGGATTGTTTTGCCACTCTGGCCACTTGTGTGGATTTAAATATGTACACAAGCGTAATTAACGAGTCA   | 4  |
| wt-44820-44940 | 3227 | AGACCCCTGTTCCAGATTCTGACCGGCTGCAAGCGCTGCCTTAAAGCGCTGGAAGCTGGTGGGTAATCTGACCAAACAGCAGCCTCGGATTCTGTGATGCTGTGGTTGATGGCACACA   | 4  |

|                |      |                                                                                                                            |    |
|----------------|------|----------------------------------------------------------------------------------------------------------------------------|----|
| wt-4490-45060  | 3228 | GGGGGTCGCAGAACAGTGTCTTGGAAAGTCTTGCGGGGTGCACATCTGCAGCCAGGCCCTTAGCCTGGGGCATGGCACATCCAGCAGCGTGTTTGGGTCTTGATGAGGAACAGCATCC     | 4  |
| wt-45060-45180 | 3229 | TGCTAGGATTTGATGTTGTTGCCGAACGAGTCAAGAATCAGGCTCTTGAAAGCGGTCAAGGGTGTCCCTTGGCGTCCGGTGGGCCCCGAGGCTCTCGCAGAGTGGCAGATGGTCCGTG     | 4  |
| wt-45180-45300 | 3230 | AGGCATTCTTGTCCTTAGTCCAACATGGGGGCCAGGAGGCGAGGGCCCTGCGAATGCTGCCAGCCTCCGGTCTGGTGTAGGCCAGGGCCAATCCGCCAGCTCATGCCGTGTATT         | 4  |
| wt-45300-45420 | 3231 | CCGCGTTTTAAACCAGATAGCATGGTGGCCTGGCCCCGAGCAGGTCGGTCCCTGCCACGTACTAATAGTAGTCCACAGTAGTGGCCCTGGTGTAAATTTAGGAGAGAGTCCCTCCCT      | 4  |
| wt-45420-45540 | 3232 | TTTTCGGCCCTGAGAAATGGATGCTGAACCTCGGTTCTTGGTAGGCAGGTGGCAGCAGAGGGCGGTGACAGGCCCTGCCCAGCTGCCCTGGGACATCTGGGAATCTTTCAGAGTTCTGG    | 4  |
| wt-45540-45660 | 3233 | GTCCAGGGAGGTAAGAAAAGTGGGGTGGTTCTGGCCACATGGACTTAAGCAGAAGTGGCCGGGATGCCCAGTGGAGTAGGATTTAGAAAATCCAAATTTGTAGTACCAGGT            | 4  |
| wt-45660-45780 | 3234 | TGGCATTCTAATCATGTGCAGAAAGTGGCAGCCAGGAGGACCCGCATAAAGTGTAAAAGTGAAGCTGGATGTCAATGGCAAGAATCCTGGAGGGATGAAAGAGGAAATCCAAACCCC      | 4  |
| wt-45780-45900 | 3235 | CCATGGGGAAGTATTTATCAGGATGTGTA AAAAGTCCATGCCTGTGATGAGGCTAGAGATCCAGGCTCGTGGGCCATTAGACAGTAGTAGCAGAGCAGGGCATAGTCTCAAAGAAGG     | 4  |
| wt-45900-46020 | 3236 | CCACGGGGGCATCTGAGTGATTGACCAGGGTGTGAGCAGATCACAACTCGGCAGGTGTGGCTGGAGAGAGGGACTCGTAGGTGTGGACGAGTGGTGGGTAGGCTATGCCTTCTCCG       | 4  |
| wt-46020-46140 | 3237 | CGTTGGCTGGAAGATAGGAGTGGGCCATAAAAGGCCAGTGCCTCGAACTGGCTTTTCAGATGTCACGGTCCAGGGCACAAAGTCCATCTTTGGAGTTCTGCCCGCATCTGTG           | 4  |
| wt-46140-46260 | 3238 | CCACTCTGTTACGCCACTCCTCGTAGGGGCAGTGCAGAGCTTTTTCCGGTACAGGGGTTGGCTGTGGCTTGTGACCCATGACACATCTGGTGGCAAGTGA                       | 4  |
| wt-46260-46380 | 3239 | GGTCTTCTGGTTTTAATACCAGGTCGGCACCAAGTTTTCTGGACACCCCAAGGATGCTGGCAGCAGCAAGGATGGGTGCAGATGTCAAGGCTACGAGGATCCGGGGGCATCTTTGAGTTTCT | 4  |
| wt-46380-46500 | 3240 | CGCCTATGATCCACCCCAATCTGCCCCCTAATGCGCCATCTGCCTACGCGAGGCTGAACCTCCTGAATCACTGCATCTTTCTGAGGCTTTAAAGAAGAATAAGTGCCAGGGCC          | 4  |
| wt-46500-46620 | 3241 | TGGTGGGGTCCAGCTGAGGTCTAATTTTGAAGAAGGATATATAAAACAGGTCATTGCTCGGATTGTGGCAGCGCATAGCACCTAGATCTAGTGAATCATGGCAGCCGGAAGAG          | 4  |
| wt-46620-46740 | 3242 | AGGCTCTAGACGAGCTCAATAACGTAATTGTGTCATTCTGTGTGACTCTGGTCTCTGGAAGTGGAAGATGTCTCCGGGGCGCATGTGTTCTCCAGGGGCAGCTCCAAACCCCTCTGC      | 4  |
| wt-46740-46860 | 3243 | ACCGTGAAGTGCGCCAGGCAGATTTACCACCTGGAGTTTGTCTACAAGTTCTGGCCCTTAAGCTGAAGAACTGCAACTACCCTCCTCGCCGTTTGTGATATCCAAACAAGGC           | 4  |
| wt-46860-46980 | 3244 | CTGGCCACCACCTGAGGTCTTTTTGACAGAGCCGTGGGTCTCAGATCGGGCCAGAGCGGCCCTTGCCCTGGTCTCAACGGATGTTGACCTACCAAGAACTCCATCATATGCTG          | 4  |
| wt-46980-47100 | 3245 | GGCCAGGATGACTTATTAAGTTCAAAGGCCCTGGTCTTCCCTGCTGAGCTTGTACTCTGAAATCTATGGTGGTCTGCGGGGCTACATCACGGAACACCCGACGAGCATGCGATTT        | 4  |
| wt-47100-47220 | 3246 | CTGGTGTTCAGGCCCAACGCCAGAAAGCCCTCGGGTCTGCGGTCATGGATATGATTAGTATGATGTCTCAGCAACTGTCTGGTCTGGTCAAGTCGAGGATACGGGCGCCAGAGTCACAGG   | 4  |
| wt-47220-47340 | 3247 | GGAGAGGTCCAGGCTGGCGTACGACACTCGGGTGTCTGGGGACTCAGACTTAAAGGGGGCGGTTGGTGGGACTTGGATAACTTTTCAGAAAGTGAACCCAGAGCCAGAGCGGAG         | 4  |
| wt-47340-47460 | 3248 | TACGCTCTTGGAGGGACAAGACTCGTGGTGGAAATCCGAGGCGGCGCCTGGAAGAAAGAACTCGTAGGACCCCCATCCGAGGCACCCGACGAGACTCGCCGATGCGCGGG             | 8  |
| wt-47460-47580 | 3249 | AGCCATTCAGGGTGGAAACAGTGCACCGGAGGGGAGGACCGTGGTGGGGGAGCATGGCTTATTCTGGCCGCCAGCATTATCTGGCACGGGTGGGTGGGTACCGCCGTG               | 4  |
| wt-47580-47700 | 3250 | GCCCTGCTCTGATTTCTGAGGTGGACTGTGACTGTGCAGGCTTGGGAGCGGGGTTCTCCAGGCTCTGGATCTGGGGTGGCTGCCTGGATCTGAGCTATTGGAAAATGAGGG            | 4  |
| wt-47700-47820 | 3251 | AATTTGTTGTTTTGGGCCAGGCCAGCTTCTGAGGCGCTGTGGCCTACGCCAGGCTCGCTTTCCGAGCCACTGCTCCGCTACTGGTGTGCGAGGTGGAGAGGCCCGGGGGCC            | 8  |
| wt-47940-48060 | 3253 | GCAACGCCTTTTCTAGCTTATTTTTGGTTGTGCGGCTGTTTCCCGCGTTTTCCGATAGAATAGTGCCTGGATCTGCAGCCGCTCCCTTCTGCGAAAACACCCGCGCCGTGG            | 4  |
| wt-48060-48180 | 3254 | CCAGGGTACCAGGGCTCGTGAAGAGTCTTGGCATTCGTGTTGAGCGTAGTACTATGACCCCTTGGTAGGCAAACTAGGCCCTGTGGAGCGCTGCTTGGCATCAAGA                 | 4  |
| wt-48180-48300 | 3255 | ATTATGTCGGGCTGAGCTACAAAGCTGTGACAGGTCCGAGCTTCTCCGCTGGCCAGTCTCAGCCAGCAGTCTATCTGGCACGAGTTCCGCACAGAGTTACACAGCGA                | 4  |
| wt-48300-48420 | 3256 | CTGCACCTTCGTCTGGTGTATGATGCTGCACAAACCGGCCACGAGCTACAGCTGCACCCGCTTGGATGCCATATCCCTGTCTGGAGCCGACCAGTTCGATCGCGCCGT               | 4  |
| wt-48420-48540 | 3257 | CGTGCCTGAGGAGTGGCCACTGTCTTCTGCCTATACCTGCGCTCTGAGGGGGGAGAAAGACGGGCGGGGCTAGGGGAGGAGCTCGTGGGGCGCGGGGGCCCTGCCTGAGCGGG          | 8  |
| wt-48540-48660 | 3258 | ATGTTTTCTGGGCATCGTAAAGCCGAATGTTCTCTGCTGTGCTGAACGTGCCTGCCGCGGGTCCCGGGCCTACAAGTGTTCAGATCCACGCTCCAGACCGGTGTGTCGGCCGG          | 4  |
| wt-48660-48780 | 3259 | ATTACCCTCCTTGCCCGTGTGTTGATGGACTGCGGTTACTGCTTGAACCTTGGAAAGCAGACAGGTGTAGAGGCGAGGCTCAATCTTTAGACCCACTCTCCAGTTTATCCCGTG         | 4  |
| wt-48780-48900 | 3260 | ACCAGAAGGAGAGCATGTGCTGACCTGCCATGCCAGCGGCGTGTGACTGCTCAACTGCGGCTGCGGGGTGGCTGCCAGAGGCTGGCTGAGCCACCGAGCGCCCTCGGGCT             | 8  |
| wt-48900-49020 | 3261 | GGCGGCCCGCAATCCGGGCAGTCTGCCGCACAACCGGCCACGAGCTACGAGCTGCACCCGTGGCTCCCGCTTGGATGCCATATCCCTGTCTGGAGCCGACCAGTTCGATCGCGCCG       | 8  |
| wt-49020-49140 | 3262 | TGGTCTGCGGGGGTGGAGGTCAGGCAGCTCTGTATTAACCTTGGCGACAGAGGCCAGAGCCGTTGTCCATCTGTGACGAACGCCAAGCTCCAGAGGACGCCGCGAGCAGCCTC          | 4  |
| wt-49140-49260 | 3263 | ACCTGTCTCTCTGTTTAGAGGTAGAATTGCCACCTGGTGAAGGGTGTGCGGGCTGCCGCTCTATCAGACGGTTAGGACGCGGGCTGCCAAGCCACCCCTCCAGGGGAGGCTG           | 4  |
| wt-49260-49380 | 3264 | GAGCGGATTTCCAGACAGTCCCTGCTTCTTAATTTCAAGAGCTGAACAGATAATCTCCCAATGATGTTTTGGGGAGGCTCAAAGAAGTACTTGGTATTTCTGACATCCCAG            | 4  |
| wt-49380-49500 | 3265 | TTCTGCTACGAAGAGTACGTGCAGAGGACTTTGGGGTGCCTGCGGCCAACCGCCATAGACAAGAGCAGAGCCAGTGTGGTGGGGTGGTGTCTATGCACACTTGGCGGGT              | 4  |
| wt-49500-49620 | 3266 | TCCGCCACCCCGTCCAGCAGGCTCAGGCCGCCATCCGCTGGGACCGGGGCTTGGCATCATCAGCAGCGGTCCACGGCCGTAAGCCAGTCCGCGACCCCTGTGTCTTCAATCTATT        | 8  |
| wt-49620-49740 | 3267 | AGCAGCCTCCGGGCGCAGTCTGGGGGCGACTGCCGCCGCTCCGCCGCCGAGCGTCGATACCGGTCAGTGGCGGGGACAACCCACGACACCCGCCACGCGGGGCAGCTAAG             | 12 |
| wt-49740-49860 | 3268 | AAACAGTAGAGGCACGAAACATGGTGTATGCATTTAATAAACAATTACAGATACAAAACTTGAGTCTCTCGAGGTCGCGATGAGCGGTTGGTGGAACGCTCCAGCTTGGCG            | 4  |
| wt-49860-49980 | 3269 | GAAGCTGGCTCAGAAAGCAGAGACTACTGGCTAGCCTGACTAAGGGTGGAGCTATAACGCAAGTCTGTTCCGGGGCGCGGTGGATAGAGAGAGGGGGATCCGGAGGGGACCACTA        | 4  |
| wt-49980-50100 | 3270 | GGTCCGGGAGGTTCAGCCCTCTGTCAACCTCCCTGATAATGTCTTCAATAGACAGAAATGGGTGACCCTGAGGGAGTGTCCACAGTAAATGTTCTGGTCTGATGGCCGG              | 4  |
| wt-50100-50220 | 3271 | GTGAGGCCACGCTTTCGAAAACAAAGTGTGTA AAAAGCGCGGATAGCGTCCGCTACCGGATGGCGGTAATACATGCTATCCTTACATTTTGGCACTTTGGCAGCTGGGAGCGG         | 4  |
| wt-50220-50340 | 3272 | CGGATGGGGTCTTCTTTTCGCACGGTGTATGTTGGGGACCCGATGCCGCTACTGGGATAGGCACCTCGGGCCGCCAGGCTCCGAGCCGGAATGCAATGGGGGAATGGGA              | 8  |
| wt-50340-50460 | 3273 | TTGGGGGATTGTTGCTGTCTGCTTGCAGGGAGAGACACGCGCGGGGAGATGCAGCCAGCGCGGGCCCGGTTGGCTGCCCCGAGGACGGGCGCGCCGCCAGCGCCCGC                | 12 |
| wt-50460-50580 | 3274 | TGGCCTTTGGCAGGGCCTGGACCCACCGCTTAAATGTTGGGGGTGGCAGGGCAGCTGCATCTTGGGGCCTTGTGCTTGCCTTTTGGGGGGCGGTTGCCAATGCACCAACTGGG          | 4  |
| wt-50580-50700 | 3275 | TGTGCGCGGGGGCGCAAGCCGACCCAGGCGGGTGCCTGGGGATGGGAAAGCCGAGGCGGCTTCTCCGGTGGCAAGCTGGAGTCCGAGGAGGCTGCTGCGCCGCGGGCACCA            | 12 |
| wt-50700-50820 | 3276 | CGGGCCAGGGGTTCGAGCCCAGGCGGTGGGGAGCGGGTAGCGAGGGCGAATTCGCGGCTCTTCCGCCCCCTGCTGTTTCTCCGTTGCATGATAGAATGGCCAT                    | 8  |
| wt-50820-50940 | 3277 | AGGGTGGCTCCTGAGAGGAGCTTGTGTTCTGGGCTGAGCAGCCAAAGCTGTTAAAGATGCCGCTGATGGTGGGAGCTATGCTCCGCTGCTGCTGCGCGGGCTTGTAGGGGGCTG         | 4  |
| wt-50940-51060 | 3278 | AGGGTGGATAACTGGGCTCTGTAAGGCAACCCCTGGAATCTGGATGATGTTTCTGTGACCCGAGGCACTGGTGTAGAGTGTGGAGACAATGTGATAGCATGGGGC                  | 4  |
| wt-51060-51180 | 3279 | CTTGTTCAGAAAGCCAGGGACTTGAAGGGGGCTGTTGTGGTGTGTTGGGAAGGAGCTCCAGGGAATCTTTGGGCATGGCCTTGGGGAGCTTCCCGAGACCGGCTGCGGCTCTCGG        | 4  |

|                |      |                                                                                                                              |   |
|----------------|------|------------------------------------------------------------------------------------------------------------------------------|---|
| wt-51180-51300 | 3280 | AAGCCCTCGTTTCGGCCCCGAATAGGGCCTTGCCATCAATCGGGGGCCTGGGAGAGTGATGGGGGGCCCAATCCCGGGTAACTGTACGTCCCGGGGGAGGAGGTAGGAGACAGCC          | 8 |
| wt-51300-51420 | 3281 | AGTCCTGGGCCCTGCCAGGGGCCACCTTCTAAGAGGGGGCTGTGGGCTGGGAGGGCCAGAGCCCTCAGATTCAGCAGTAGTGCTCCCTTTTCCCTCGTCCCTCCCTC                  | 8 |
| wt-51420-51540 | 3282 | CCAACTGCTGGAGCCGGTGGAGGAGGCCGGGGTGTATCTGCTGACTGAAACCCGCTCCCGCTGACCAGTCCGTGCCACCCCTTGGGGGAAACCCGGAGAAGCTCCTGGACGTTGC          | 8 |
| wt-51540-51660 | 3283 | GTGGATTGGGGGAAGCTGGTATCCAACCGGCAGTGGAGGATCTCGTGCCTAGAAAGGAGGGGTTGAGTACATCGGTGGCCATCGTAGGCCCGGCCGCTTAAAGTAGAACTGCA            | 4 |
| wt-51660-51780 | 3284 | CGTCCGGCAGATTGTGCCGATAGGTGAAACACTTCCAGATGATTTTTTCTGTTGGCCAGGATGCCACCGTGGGGGGCCCTGGCCCTTCTAGTGTGGCGGCCCTGGCTCGGTGAGAA         | 4 |
| wt-51780-51900 | 3285 | GCTCGCTAGCCACAGCCCTGGCTGCAAGAGTGACATCTCGCTGCAAGCTGGAGTACCGCTCAGGATCCTGCAGAAAATTCAGCGAGATGTCCTCCACCGAGCCGGAAGG                | 4 |
| wt-51900-52020 | 3286 | GCTCAGAGTGCCTGCAGTAGGAGGACGCCCCCTCCCGGAGGCTGACTCCTGACCAGCTGTAGGTAGAGATTCAGAGGAGACAAAGAGAGTTAGGGGGCCAGCCGAGGAGCCGG            | 4 |
| wt-52020-52140 | 3287 | CCGCCACGGCCCTCAAACCGGAGACGGGGATGGTGTACCCGGAGCCCTCTTAGGACCCTGATGGGAGTGCATAAGGCATAAGATTTCTCAGGGCCCGCCGGTAAACGGTCCGT            | 4 |
| wt-52140-52260 | 3288 | AGGAAGACGGGGTTTCGGGGGGACCTCGAGTCCCTCCGCCCTGGGGAGCTTCTCCGCGTGTATAGGCCCTGCTTCAAAAGTCGCGCAGGTAGTCTGAAATGCGACCCGGCCCTCCA         | 4 |
| wt-52260-52380 | 3289 | GCGGGCGCAATGAGTCCAGAGCTGCTGAAGGGCTCGGGGGCGAAGCACCCGGCTGCGAGGAGCAGCATGACGGCTCGGGCGCGGGCCCTACTTTGGTTGGACCCAGGCCAAAGAACT        | 8 |
| wt-52380-52500 | 3290 | CGGGTGGCCAGAGGGCGCTCGGTATCCATCTCTCCAGCGCTGGAAGAAGATGAAGCCGGTGGTGGACCCGGCATCGGTGGCGGTGAGCCGGCGCGCTTCCCGCT                     | 8 |
| wt-52500-52620 | 3291 | CGTTGCTCCGCGGGTGGTTGAGCGGCTCCCTGGGTCTCGCGAGACGTAGCCGGGTTAAGGGGTCGACGGGAGACTCTGTTCCAGCCAGAGGGTCCCGGCTTCCAAACCCCATCTCTCGCTAG   | 8 |
| wt-52620-52740 | 3292 | CCGAGACCAGCCGAGTCTGCGTAGAACGATGGGGGCCAGGAAGGGCCAGCGTAGGCCGGATGTGTGCCAGCAGCAGCCCATCATCTCCGTTGTTCCAATAGAATAACTTCCC             | 4 |
| wt-52740-52860 | 3293 | GGTCTGTGGCCGGGGTGGATAAAGGGGGTATTCTAGAGGCGATGAGACTGGCGTCCGCTAAAAGTGTATGGCCACAATGGGGTGTCTGCCAGTCTTCCATCAGGGCTTTGGCG            | 4 |
| wt-52860-52980 | 3294 | CAGAGACGTATCCCGAAGCAGCTCCCGGGCTGGACTCCACGCTGGGCCAGGTGTCCAGTAGGAGTGGCGGGCGGGCCCTGAGCGGGCGGAAGCTACACTGGCCAGGGTTCTTC            | 8 |
| wt-52980-53100 | 3295 | TCCTCTCTTGGTATCTGCGGGGACCAATAGCTTGGGGCGTCCGGCTGGGTGACGAGTCCCTGCAGCTTCCCTGCAGCTGGGACTTCTCGGCTCTCGATGATGGCTCCAGTCGGG           | 4 |
| wt-53100-53220 | 3296 | AGACGGGATGATGTTGAGCGGCTCCCTGGGTCTCGCGAGACGTAGCCGGGTTAAGGGGTCGACGGGAGACTCTGTTCCAGCCAGAGGGTCCCGGCTATTTCCCGGCCCTGCC             | 8 |
| wt-53220-53340 | 3297 | CCGCCAGAAATGTGCCCGCCGGTGGGGCTCCATTGCCCATCCAGTTGGTGGTGGCGAAATCGTGATGAGGAGGGCAGGTTGTTGGTCAAGGGATGCTTAACGAAAACGGTAGGCT          | 4 |
| wt-53460-53580 | 3299 | CCACCAGATCTTGGCTGGCCGGGTGGTGTGGCCCTGGCTGGGTGACCAGATCCTGCAGCTTCCCTGCAGCTGGGACTTCTCGGCTCTCGATGATGGCTCCAGTCGGG                  | 8 |
| wt-53820-53940 | 3302 | CGCAGATCCCGGATCCACTTGGCGGCTGCCAGGATTTCCGGTAGGGCCATGAGCCGTTCCCGGGCGCTGCCCGGGCAGGGCGCCCTCGAGGGGAGCCTGGACAGGGGCTTTGGGCG         | 8 |
| wt-53940-54060 | 3303 | GGGAGGGAAGCAGGCTCCGGATTCTCGTGGGGCTCGTGGGCTGACCTGGAGAGGACGGCTCCAGAGCCGTGAAAGCCCCCGGAGTGTGCGCCCATCTCGTGGGCTTCC                 | 8 |
| wt-54060-54180 | 3304 | CCATCAGGCTGGCTTCCCGGACGCTGCTCCAGCGCCGGACTCGGCCGCTCGGGCTCGGCTGGTACGACAGTCCGAGAGAAAGTCCCGCTGGCTGGGAGATGCGCCGCTCTC              | 8 |
| wt-54180-54300 | 3305 | GCCTTGTGAGCAGCTGGGGCTTCTTAGGCCAGAGCCGAGTCCGAGGCCAGCCTGGCGGGGGCGTTCCCTGGGGATAGTTGAGGAGGAGGAGGAGTTAGCCTGGCTGGGTATTAG           | 8 |
| wt-54300-54420 | 3306 | TGGCTTCGGTAGCGTCCGATCCAGTACTGCTCAGTACGATGGCCGTCAGGCCAGCCTCGCTGCTGCTTTTTCCAGAAGCCCGCCAGCCCGCTCGTACTCCGCTAGGGGGCT              | 8 |
| wt-54420-54540 | 3307 | CCAGATCCGTTGACCAACCGTATTTATGTCGGGGACTGCAAGGGCTGGCGGCTGCGCGAGGGCCAAACGGATGGCATCGGCCCGCTCTGCGCGAAAGAGGGCCCGGGCG                | 8 |
| wt-54540-54660 | 3308 | CTTCTCCGCTCTCGCCCTCTCTCTCTTCTTGGGGTAGCCGCGGGGTGGCGGGCCAAAGCTCCAGTCTGGCCAGAGGGCCGGTCTCGATATCCGTGAACAGCCGGTCTCCGCGG            | 8 |
| wt-54660-54780 | 3309 | CCTCAATCTCTCCCGCACCAACCATGCTCCAGAGCAGGATCGAGTCTCTCCCTCCCTACCTCTGTTTCCCAATAGCATAGCGGCAAGGATCTGTGTGAGGAGTCCCAAGATGT            | 4 |
| wt-54780-54900 | 3310 | CCGTGTTCTGGCTACTGCCCGCTGCTGCCCGGCTGAGTCCGTTGCCATCTCGAATGTGTGACAGGGCTCTGAGACCATGGGTCCAGGATCGGTCAATGCCATCTGCACCTCAGGGT         | 8 |
| wt-54900-55020 | 3311 | CCAGCGCTTCTAATCTGGCCAGGCTCAATCGCTCTCGGCTCGCCGCTCTGCTCTCTCTTCTGCTTCTCTCGGAGCTTCTCTTTCTTCTGCGCCCGTCTCCATAAGCT                  | 4 |
| wt-55020-55140 | 3312 | GCCGAGCTTCTCTACATGCTGCTTGGCTTTGTTGGGGCAGTGTCCAGAAAGGCTCGAGCTGTTCCCGTGGCGGGCTTAAAGCCTCGCCCTCCAGGCCAGGCCGCTGCA                 | 4 |
| wt-55140-55260 | 3313 | CCTCTTCTGTGAGCTGATCGTTGTTGTTATTCTCAATTTCTGCAAGTAACTTAGGAAGCCTTCTTGGCTTCCCTGGGATGAGCGTTTGGGAGAGCTGATTCGACGCCAGAGA             | 4 |
| wt-55260-55380 | 3314 | GTAGTCTCAGGCATCTCTGGAGCTGACGTGATCGTGCATCATAGACCAGCAGTACCTGGGAGCAGATTACCCCGCGGGCGCTCTCTTAAAGTGTGTGAGTAGCAAAAT                 | 4 |
| wt-55380-55500 | 3315 | TCTGCAAGGCCACTAGCCGCGCTGGCTCCAGCCTCAGCCGTTGCCATCTCGAATGTGTGACAGGGCTCTGAGACCATGGGTCCAGGATCGGTCAATGCCATCTGCACCTCAGGGT          | 4 |
| wt-55500-55620 | 3316 | CAAGGACCCGCAAGTACGATAGAGGTGGTCTAGCTCTCTCGAAGGAGGCAATGATGTTATCGATGGTGTAGAAGGTGATGGATTTCCAGGATGTTTCATCAGGTACTTTTGGAGCGAA       | 4 |
| wt-55620-55740 | 3317 | CAATCTGCTGATAGTGCACGTAGGGGATGACGTGGGGTCTTTCGGGCCCGACTATCGACCCGATTCGATGACTTTTCTATGACGGGATGGTGGGGCCCGGCTGTCGG                  | 4 |
| wt-55740-55860 | 3318 | CCAGCGGTGGCGTGGCTTCGGGGTGTCTGGTGGTGGCGGGTGTGCGAGAGGAGAGGGCGGAGAGATGGGGGGCGCTGGGGCCGAGGCCACACCCGGCCAGGCCAACATTGCCTCGATGT      | 8 |
| wt-55860-55980 | 3319 | CGTCCAGGATGGTGGGAGGCGCTTTGTTTTCTGTTGGTCTCGAGCTCCTCTGTTTTTTCGCGACTGTCTCAACTCTGGAAGGGGGCAATGCTGGGGTCTCTCTCAACTC                | 4 |
| wt-55980-56100 | 3320 | GCTCCAGGGGCCAGGGGATACCCGCTCATACTAAGGGCGGTGCCAGGATAGAGGAGCTCGCGATGCCATGCCATTCAATGGACGTGACCGGATGTTAGGAGAGGCAGGGAGCGGATGA       | 4 |
| wt-56100-56220 | 3321 | TCTGGCATGTGCGCCAGGTGTGTCAGGAGTCTGCAAAATCCATCACTGTTGGGAGGCTGGGTCTCAAGGTAGGAGAGATAATCGGAGGCCCGCAGGCCACCTTGTCCCTGATGT           | 4 |
| wt-56220-56340 | 3322 | CCGCGTACACCTGCGCAGTGCAGGGCCGCACTTCTGGACCGACGGCCAGTGTGGACAAAGGGGGGACTGAGGGCGGGGAGGGGGCCATACTATCGCTGCAACAGCGCCA                | 8 |
| wt-56460-56580 | 3324 | CGTGGGGCCCTGTAGATGGAATATCCTCGGGTCTCTCTCTCTTCCCGGCTCTGATCTCCGCCGAGAGCAGGTGGTACGGCTCTGGGGCCGCTCCAGGTCAAATTTTC                  | 4 |
| wt-56700-56820 | 3326 | TATGGAATCTCCCGCTTCCCTTGTGTTCTGATAGCATGTTGCGAGGTTTGGATGTTAAGTTCGGAAGTGAGCAGTGTCCAGGTCCAGCGTGGGACCTGCAGATGTCGCCGAC             | 4 |
| wt-56820-56940 | 3327 | AGTCCCTTAAAGAAATCCAGCAGATTAGCACAGACATCGGTCCCTACTCCTTATTAGCCCTGCTCGAGGACCACTGTCAAGAAGATAGTCTATGCTCAAGGCATCTCCGCTC             | 4 |
| wt-56940-57060 | 3328 | GCACTTCCGGTTAGAGCCGGTCTGACAGCATGGCCTGTTCTGGTAGGTATGTCGGCTATTCTCGAATGTTGCTCTCGAGGGGACAAAGTCCATCTCAGGAGTCTCTATGCAA             | 4 |
| wt-57060-57180 | 3329 | AGGTGGTCTGATGATATTGGCTCTGGCGGTCCAGTGTGATGGGGAGCTGGGGCACTGGATCCCGATTCCAGGCTGTTGGAGAACACTTCATCTCGAACATGCTTTCATCTCTG            | 4 |
| wt-57180-57300 | 3330 | TGGTGGGATATCGGAGGCTAAGTGCCTCCGCTTCTCAGAGTCCGACATGGATAGGAAAGGCTCCTTAGTTCAGACAGGTAGCGGACGAGGCCAGAACCCCAAGATGCATATCCC           | 4 |
| wt-57300-57420 | 3331 | CAAAGGAGGGCTGCTGCCAGAGGGAGGTGATGGGGATATCTCCGTTCCAGCCGCTGACGGCGCGGGGGATGGTTTTTCTGGTTCGAGTGTCTGGTGTGGTGGGAGCTGCTGAG            | 4 |
| wt-57420-57540 | 3332 | CAGGAGGAGGAGCCGGGTGATGGCAGGGCTGCTGCTGAGGAGAAAGGAGCCAGGAGCCCGGGCTGATCAGGAGAAAGTGGAGCCCGGGGCTGCTGCTGAGGAAGAAAGTGGAGAGGAGCCGGGG | 8 |
| wt-57540-57660 | 3333 | CGGCTGATGGCTGGCTGCTGCTGAGGAAGAAGTGGAGAAGGAGCCGGGGCTGATTGCGGGGCTGCTGAGTGGAGGAGGAGAAGAGTGTGGTGGTGGGGCTGCTGCTG                  | 8 |
| wt-57660-57780 | 3334 | CAGTCCGGGAAGGGATGGGGTGTGACAGGGATTTTGGTTCAGGGAGCTGCTGTCGAGAGGGATGGGTATTTGCAAGGGAGGCGAGGAGATGGAGTACTGAAGGAGCGATAG              | 4 |
| wt-57780-57900 | 3335 | TTGAGACTGGCGGGGTGGGGTGTGGGGAGCCGGTGGTATTGGTGGGGATGGGGATTACTGGAGGGGAAGGCCAGCTGCTGAAGGGGGCGATGGGGCGAACGTGGGTGCGTG              | 8 |

|                |      |                                                                                                                                 |    |
|----------------|------|---------------------------------------------------------------------------------------------------------------------------------|----|
| wt-57900-58020 | 3336 | GCAGCTGATCATCCTCTGTGTGAGTGGTGGAGGACAGAGGGAGGGCGGGCCGGAGGTTGGGCTTCTTGTTGGGGCTATCTTTGCCAAATCCCTTTTTCTCTTGGAGTCTGAGGCGGTG          | 4  |
| wt-58020-58140 | 3337 | CGCCGCTCGACGCCCTTGGTGGCGTGAGGGAGCGGGACCCCGGGGTGTGACCTAGGCCGGGATGGGGATGAAGAGGGAGGCGTGGAGCCGGGGCCGGAGCCGGGGCCGGG                  | 12 |
| wt-58140-58260 | 3338 | AGCCCGGGCCGCGGAGGCGGGCCGCGGAGGCCGGGGCCGGAGGCCGGGGCCGAGAGGCCGGGGCCGAGAGCCGGGGCCGAGAGGCCGGGAGACGACGCCGGGAGTTGGTCT                 | 12 |
| wt-58260-58380 | 3339 | TTGCAGGACTATACCTGGCGCGCAGGGAATGAGTCGGATGTGAAGAATCGAGAGGCCAGTGGCCTGAGGTTATACGGTATTATTCGCCGTTCAAACGGTAGCATGACGGGAGGGCTGCTAT       | 4  |
| wt-58380-58500 | 3340 | CAGCACCGGGGTCCCGCCGCCTCCCATCACTGGACACAAGCTCGGGCCCCACCAGTCAAAGGCTGCGCTGGCCATCAAAGTATACACGCATAGTGTCCAGCATAAAGA                    | 4  |
| wt-58500-58620 | 3341 | TGCGGGGTCTCTGTCTCAAAGCCTCGGTAGAAAATAGAGTCAAGGCGAGTACTGGCCCTGGTGCCTCCAGTACTGCAGGATGCTGGCCATAGTGTGCTGACTGTGACT                    | 4  |
| wt-58620-58740 | 3342 | GGCGGGGGTCCCAGGCGCCGCTTCGTCAGTGGGGTCAAACAAGTGAAGGAGGCCATCTGTCTCGATGATGATGGCCCCCGGCGGAGCCGGCCAGAGATAGAGGAGGCTGAACTGGG            | 4  |
| wt-58740-58860 | 3343 | CCACCCCTTGTAAGTCCGCGTGCAGGACCTCGGCCAGGGACTGAACAACCTGCCAGTTCGATCTGGGCGAGGAATAGGACAGGGCACAAGATCTCCGCCAGCGGTATATGTGCACGC           | 4  |
| wt-58860-58980 | 3344 | GCCCACCGCCCTCAGGACACGGAGTGGGCACGTCGTCGCAACTGGGCCATCTCTGTGCCCTTGGAGTGCCTGTGGCGCATGAGGGCATTACGCCGGCCCCCTGTCAGGACCT                | 8  |
| wt-58980-59100 | 3345 | CGTCCAGTCAAGGCGGGAGGTGAGGGGCGGCCGCCAGGAGCTTGTACCAGGTAGAGGACGCAGTTGTGACGCACTGGATGCCGGCAAAGCGCCAAACTTGCAGTGGGCCTGGT               | 8  |
| wt-59100-59220 | 3346 | TGCACGAGCCGTGCCTAGGATGCGGAGGGCCGAGCTCCACTCCGCCCCGGGGGCACTCATCATGATGTCCTGTTCCGCGATTCGGCGCACGGGGCCGGTCCCAGGGTGCCTGTGGT            | 8  |
| wt-59220-59340 | 3347 | CCCAGTCGCGTACTCATCTTCGCGGGTGGGCGGGAGGACGCTTGTGCCCCCTTCTGGTCCGGGGTCTACGCGGCTGGCGGCGGAGCCCGGAGAGATAAGGGGGTACGTG                   | 8  |
| wt-59340-59460 | 3348 | TGTGCTCCGCTCTCTCTGTCTGGGCGCCGCCGCGCTTGGCCGCTTGAAGGAGAGGGGGTAGTCCGGGACTGCTCTGCGGGGCGAGGAGTCTCAACTTCTGGGCTCGGGCC                  | 8  |
| wt-59460-59580 | 3349 | GCGGTGTCGATATCCGATGGCCTTTCCCTGTCTCTCGTATGCTCTCTCTCTCTCCCGCAGGCGCCCTGAGATCTGCCTCCCTCTCCCTCTCGTCTGGTCCGAAAAGTCT                   | 4  |
| wt-59580-59700 | 3350 | GAGGAGGAGAAGGAGAATGGGAGGAGTCCAAAACGGCAGCCACCTGCCGTGGGGCGGTGGTGACAGTCCCGBGCTGGCCCCGGCGCTTGTCTGGCTTCCGCTTACCAGGAGAATG             | 8  |
| wt-59700-59820 | 3351 | GCCCGGATTTTTGGCGGGAGGATGCCGAATGGCGGGGGCCTTTGCCACGGGTGAGGGGGAATCGTGGTTAGGGCCGCGAGGAGGTGGTGGGTGGACCCGGGGCCGTGCAGGCA               | 8  |
| wt-59820-59940 | 3352 | AAGCGCGCAGAAACAGGAGGCTTCCTGGGGTACTGATCTGTTCGGGATTAGTCCATAGGCATGGCGGGTGTATGTTTTAATAGGGGTGGCTCTGGCGGGCAGGATGATGGTCGAGG            | 4  |
| wt-59940-60060 | 3353 | ACGTCACACAGGGCTTGCAGATGCTCTTCCTAGATACAGGATGTCGTCATGCTGAGGGAGGTGGGGTGTCTGCTCCCCCTCGGAAAGCCGCTGGTGGGGATGAAGACAGGT                 | 4  |
| wt-60060-60180 | 3354 | GGTGGCGGGCCTCGCGGACTATGGCCTCGGCACGCTCGCGTCGATGGCGGTGGTGGAAAGCCGGGGAATGTGTAATCCCAGAACCGTAGCGACGCTGCGCCTGAGGGCG                   | 8  |
| wt-60180-60300 | 3355 | CCCGTCAGGCTGATCCAGCTCCAGGCGGTCCACCCGCTGTTGAGCTCCTCGAGATCCGGACGCAAGGGCTCGCTGGTGGTGGCCAGAGGGGGTATCCGCGATGCCCGGCTC                 | 8  |
| wt-60300-60420 | 3356 | TCCCTGAGGGCCGGCACAGGAGGGCCTTCTGAGGGTGGCCGCTGTCGCGCTGGCCAGGGCCACCTGCGCGGCGCTCCCGCCACACATCTGGATGCCCTCCAGACGCTCTTAGC               | 8  |
| wt-60420-60540 | 3357 | GTCTGGAGTCCGTGGAGTAGTGGCGGGGGAGGATGAACGCTCTTTCCCTTACCGCTACCCGCTCCGCTCCTTCCTTCCGTCGCCAGGAGTCTGACCCTCCCGGCTCTGGC                  | 4  |
| wt-60540-60660 | 3358 | TCGTACAGGAGCGGGCGGAGCAGCCTCAAAGTCCGCGTCAAAGCGGAGATGCTCCGAGAGGGTCTACCCGAGACCAGAAAGCGGGGTGGCCAGGCGAACGACTCCGCC                    | 8  |
| wt-60660-60780 | 3359 | GTCGTGCTATCTCAGGGTGAAGAGGAGTGAAGAGGGAGTGGCCAGGCAAGCGGTGGTCTCCGCCCGCCTGTAAGTGAGATAGTCTCGGAGATGATGCTGAGACCTCT                     | 4  |
| wt-60780-60900 | 3360 | CGGACGCGCTCATGATCCTAAGGACTCGCTGTGGGACGACAGCCCCAGGGGCCCGCCCTCTCGTCTTGCACCTCGGCTCTGCTCCCCGCGCTTCCCTTCCCTCTAAG                     | 8  |
| wt-60900-61020 | 3361 | TTGAGGGGGCGAGTCCGACCCTGGGGGACTCCCAGGCATCGGAGGGGGCCCGTATAGATCTCCAGACGTTGGCGTATATGAGTCTCGAGAGGAGGGCCGGGGCCGGCTCAGCTCG             | 8  |
| wt-61020-61140 | 3362 | GGGAAGGGAGGGCCAGTCCGTCGCAAGGAGACCAGCCAGCGGCGGCGGCGAGAGCGGGTTTTGGGCGTCTGTTGGAGAGACCAGGGCCGAGGGGGCCGAGATTTGAACTCG                 | 8  |
| wt-61140-61260 | 3363 | ATGAAGCGCGCGGGAAGAAGGGCTGTGGACATAGCCGATCCGCGCCGCGTTTGGCCGCCCTCAGGACCGCAAGTATGCTCGACTCTGCTGGCGGGGCGCCGCCACCCTG                   | 8  |
| wt-61260-61380 | 3364 | GCCGTCAGCTCTCTCCCTGCTCGCGGGGAGTAGGGGGGCTTACAGGGGAGGGCCGAGCCGGGGCCGGGGCTGCCACAGGCGGTGTAGCGGACCATAGCAGAGACCTGAGG                  | 8  |
| wt-61380-61500 | 3365 | AGTTCGGATGAAAGTCCCCGCCACTGCTCATCTCGCCGCGGAGGGGGGACGATGAAGATGCCAGAGGGTTACGGCGTCCAAGGGTCCCGCCCGCCCCCACACCACAGCC                   | 8  |
| wt-61500-61620 | 3366 | GTCCGGCGGGGGCGGGCGGGCGGTAGAGGGGGCCTGGTGGCCGGGCTCGTGTCCACGGCCTCGGCTCCGCCCGCAGGTAGGCGGCCGGGGCCACAGGGCGAAGCGGCTCGTG                | 12 |
| wt-61620-61740 | 3367 | GGGCTCGCGTGGGCAGCAGTGGAAAAGTGCAGGGCAAGCCGATAGACTCTTAGGAGGGCGGCTGGCTCGAGCCACCTCCACCAGCAGCGGGACACCCGGGGCAGAGGCC                   | 8  |
| wt-61740-61860 | 3368 | AGCATATGGCGTAGTCCCAGCACGGCTCGTTGAGCCCGGCGAGAGCAGAACCCTGGCCACTGCTCGATGGCGGCTGGAGAGAAGGATCCCAGGGCTCCCAGGCTCCCTGCGG                | 8  |
| wt-61860-61980 | 3369 | CGAGCGCCAGGGCCTCATCTCTCGCCCATCCCAGGCGAGGAGCCGTGATGACCCGAGTCTGGGACGCGTAAGTCTGGTCCCAGAGCAGGGCCTGACACATAGCTGAAAAGAGG               | 4  |
| wt-61980-62100 | 3370 | GCCCCGAGGGTCCAAAAGCCGGAGCCGGCGGGCTCAAAGGCCAGGACGGGCACAGCCGCGACGGGGGGGTGTGCCCCCGTGGCTCCGCTACAGCCAGGATCTTACCGCC                   | 8  |
| wt-62100-62220 | 3371 | CGCCCGGGGCCAGGGCAGCGAGCCACCAGCTGGAAGGACTCGGGGCGGTGAAGAGACCACCAGCGTTCCTTACCCTTCCCAGGGCCCGCCCGCCTACTGTGCTCCACC                    | 8  |
| wt-62220-62340 | 3372 | AGCTCCAGGGCCTGGCCTGATGCTCCGCGGCGTGGCTGACCCCTGCCCTGACGCCCGCCAGGGTAGCGGTTGGTCTCCCGGTATACGGTAGCCAGCCATCCCCAGGCTGTTTT               | 8  |
| wt-62460-62580 | 3374 | AGCACCCTCCCCTGCTCCCTTTCGATGATGCGCGGTACGCGGCCGCGAGGGGCCGGGTCTCTCGCATGAGCCAGAGGCTCCAGCGGATGCTGGTGGCCGAGAGGCTGTGTTGGG              | 8  |
| wt-62580-62700 | 3375 | GGCAGTGAGGATGCCAGCAGTCCAGGCGCCCTCCAGATGGCCGAGGCGAAGCTGCCCTGGAAGGAGGGCCCGCGGAGTAGGTAGTAGGCGTGGTGGCGGAGGACCGCGCGGG                | 8  |
| wt-62700-62820 | 3376 | TAAGCGTGGCGCTATGAGGGTGAGAGTATTAATAAATCGCGCACCAGCAGCCGCTGGGCCAATCCCGAGTCAAAGATCCCCGCTCAGAGGCATACGCCGCGCAGGCGGGCA                 | 4  |
| wt-62820-62940 | 3377 | GCGGGGTCGTCGCCAGACAGCACTGACGCGTACGCGGGGAGCCCGGCTCCACTTGCAGGGGTGGTGGCGTCTGCCCTCCGCTACCGCCGCTGCTGACTCTCCATA                       | 8  |
| wt-62940-63060 | 3378 | GCGGACCCATGAAGTCCAGGGGCTGCTGATCGCCCGCTGTCGAAAGGCGGAGTGCAGCCGCGGAGTGCAGCCGCGGAGTGCAGCCCTCCGCGCGGCGTCAAATTTCCGGGGTCCGAATTCACGGG   | 12 |
| wt-63060-63180 | 3379 | GACGTTGCTGGCTGTTGAGGAAACAGCGCAGGCTCTCGCTGAGTGGCGGCCGCTCTGCGCGCAGGGTCTGGCCGCGCAGGCTGCTGCCCCGGGGGAGTGGCGGTGCGCGGGGTGGCAGTGGAGGG   | 8  |
| wt-63180-63300 | 3380 | GGGAGCTTCACTGCTGGTGGTGCGGCCAGCTTTTGGGACTTTCTGATACAGCCAGCTCTTCAAACAGCCGAGGCCACTGGAACGCCCTTTTCAATTAAGCAGAGTGAC                    | 4  |
| wt-63300-63420 | 3382 | CTGTACGACAGCCCGCAACCCTGCTGACTGGTCCGCGACTTTGGCGGCTGGTGGCCAGCCGCGCTCCACAACCTCATACCCTGTGGGCCCTGGTGGAGAATAAAGAGC                    | 4  |
| wt-63420-63540 | 3383 | ACCTATCTGAATAAATACACCAGGTTGCTCCAGGGCTGTGTCAGCAAAGCCATCCCTCGCAGCACCCTCAAGGTGACGGTGCCTCAGGAGGCTTTGTGGATCTGGACGCCGTGCTC            | 4  |
| wt-63540-63660 | 3384 | TCCGGCGCGCGGGGGTGGCGGCTGATGCTCTGTGGGGGCTGGCCCTGACGGCTGCCCCCGGATGCGCGCTATGTGCTGTGACTGACCTATGAGGAGCCGGGGCCGCTTT                   | 8  |
| wt-63660-63780 | 3385 | ACGTTTTTCCAGTGTCCCGCGGACTGTAGATCATGAATATCTTAAGAATTTACTACTCACTCATCATGACCCTATGCTGTGGTGCAGCCCTACATATAGAGGAGC                       | 4  |
| wt-63780-63900 | 3386 | TTCGGGGCGGTTGCCTGCTGGGCACTTAGTGTACTGACGTTGGAGGAGGCTGCTCAATTTACCGGTCGCTGAGTGCCTCAGGCTGCTGCCCCGGGGGAGTGGCGGTGCGCGGGGTGGCAGTGGAGGG | 8  |
| wt-63900-64020 | 3387 | TTCGGGGCGGTTGCCTGCTGGGCACTTAGTGTACTGACGTTGGAGGAGGCTGCTCAATTTACCGGTCGCTGAGTGCCTCAGGCTGCTGCCCCGGGGGAGTGGCGGTGCGCGGGGTGGCAGTGGAGGG | 4  |
| wt-64020-64140 | 3387 | TCTGACTGGGAGGTTACTCTAGACTTAAAGGAGGAAACAGGAGGAGGAGGGGGACAAGAGCACAAGGTTGTCAGTGACACCCACCACACAGCATGGCACGACGAGCTGATGTCG              | 4  |
| wt-64140-64260 | 3388 | AGCATGAGCTCCTCCAAATGATTGATGAGTTAAGGTCAGAGCCAACTAGACCCCCGAGGCTGATGTCCTGGCGGGGCGCTGCTCCACCGCTTAAGGCCGAGTCAATACACA                 | 4  |

|                |      |                                                                                                                                   |   |
|----------------|------|-----------------------------------------------------------------------------------------------------------------------------------|---|
| wt-64260-64380 | 3389 | CAGTAGCCGAATATCTGGAGGTCTTCTGACAAATCTACGATGAGGAATCTCCAGATGCACCGGGATGAGCTGGAGACCCGAGTCTCTGCTTCGCGCAGAGCCCGGCTACGAGC                 | 4 |
| wt-64380-64500 | 3390 | GCATCGTCTCCAGCGGCTACCTGTGCGGCCCTGCCTACTATGACACCTATCTGTATGTTGGGCGCAGCGGGAAGCAGGAGAGTGTGCAGCACTTTTACATGCGGTAGCCGGCTCTGTG            | 4 |
| wt-64500-64620 | 3391 | CCTCAACCACCTGCCTCTACGCGGTCTCAGGGCAGCCCTGCAGCGGGCCAGGCGGAGATTGAGAGTGACATGGAGGTGTTTGATTACTACTTTGAGCACCTAACCTCCAGACGGTGT             | 4 |
| wt-64620-64740 | 3392 | GCTGCTCCACGCCCTTTATGCGCTTTGCGGGGTGGAAACTCCACTCTGGCCAGCTGCATCCTCACCACCCCGACCTCAGCTCCGAGTGGGACGTGACCCAGGCCCTTATAGGCACC              | 4 |
| wt-64740-64860 | 3393 | TGGGGCGCTACCTCTTTACGACGAGCCGGGTGGGTGTAGGGGTGACGGGGCTGGCCAGGATGGAAACAATCATCAGCCTCCTGATGAGGATGATCAACAGCCACGTGGAGTACCACAAC           | 4 |
| wt-64860-64980 | 3394 | ATGGCTGCAAGAGCCGGTCACTGTGGCGGCTACATGGAGCCCTGGCACAGCCAGTTCATGATTTTGGAAACGAAGCTCCGGAGAACCCAGAGGTGCCCGGCATTTTACGG                    | 4 |
| wt-64980-65100 | 3395 | GGCTCTTTGTCCCGAGCTCTTTCTTCAAGCTTTTAGGACACCTGGCTCGGACTGGTACCTGACCCCTCAAGGACCGCGGGACCTGGAGAGGCTCTACGGGGAGGAGTGTGAGC                 | 4 |
| wt-65100-65220 | 3396 | GCGAGTACTATCGGCTGGTGACAGCGGGCAAGTTTTGTGGCGGGTCTCCATCAAGTCCCTGATGTTCTCTATCGTCAACTGCGCGTCAAGGCCGGCAGCCCTTATCCTTTTGAAGG              | 4 |
| wt-65220-65340 | 3397 | AGGCCGCAACGCCACTTTTGGCGGAGCTGCAGGGCAGGCCATGAACGCCGCCAACCTGTGCGCCGAGGTGCTGCAGCCCTCGAGGAAGTGTGGCCACTGCAATCTGGCCAACA                 | 8 |
| wt-65340-65460 | 3398 | TCTGCCTCCCGCTGCCTGGTGAATGCCCTCTGGCGGTGCGGGCAGCAGCGGGCCGACACCGAGGGGATGAACCTCTGCTGGCCCTCCCTCGACTCTCAGTCAACCTACCTGGAGGG              | 8 |
| wt-65460-65580 | 3399 | GGCAGTCGGTGTGATGATCTCGCTAGCCCGCTCAGAGATGCCACCCAGTGTGCCACTTTGTTGGTGGCTCTCCACTCTCAGGGATCCCCACTTATGATCCAGGGATATGGCT                  | 4 |
| wt-65580-65700 | 3400 | CCATGGCCCTCGGGTGCAGGGCTGGCCGATTTTGGGTGAGGAAGATGCCCGCGGGCCAGCAGCCTGAGTGTGCGGCTGCTCCCTCTGCTCTTAAACAAGGAAATATTCGAACATATGACTTTACGGCCC | 4 |
| wt-65700-65820 | 3401 | TCTGCACCAGTAGTCTGATTGGACTTCACACCAGGAAGTTTTCCGGGTTTCAAACAGAGCAAGTATGCCGGGGGTGGTTTCACTGGCAGATTGGGCAGGAACAGACCTTTCTATT               | 4 |
| wt-65820-65940 | 3402 | CCAGGGAAATTTGGTCTGCGCTCTGAACGCATTGTGAGGGATGGGCTTTCAATTCACAGTTATCGCCCTGATGCCACCTCAGGCTGTGCCAGGTGACGGGCTGTTGCGAGCGCT                | 4 |
| wt-65940-66060 | 3403 | TCTACCCCTCTATGCAATGCGCTCCACCAAGGTCAACAACAAGGAGGAGGCCCTTAGGCCAAACCGGTCTTTTGGCGTCATGTGCGTCTGGATGACAGGGAAGCTTTGAATCTTGTC             | 4 |
| wt-66060-66180 | 3404 | GGGGCGGTCTCCTGCCTCCCGGAGGCTCTGCGGCAGCGCTACCTGCGTTTCAAACGCCCTTTGATTACAACAGGAGGACCTGATCAGATGTCCCGGGACAGGGCCCTTTGTGG                 | 4 |
| wt-66180-66300 | 3405 | ACCAGAGCCAATCTCACAGCCTGTTTTGCGTGAGGAAGATGCCCGCGGGCCAGCAGCCTGAGTGTGCGGCTGCTCCCTCTGCTCTTAAACAAGGAAATATTCGAACATATGACTTTACGGCCC       | 4 |
| wt-66300-66420 | 3406 | GCATTGAGAAGGCCCGCATCTGGGGTGTGAGTGTAAAGGCCAGCGGGCTCTGTGCGTCCCGGGGAGGAACAAGAATGAGCGGAGTCCCGTGTGAGCAGATGCCCGCTCGTCCCATGG             | 8 |
| wt-66420-66540 | 3407 | AACCGGCGCAGGTTGCGGGCCGGTTGACATCATGAGCAAGGGCCAGGGGAGGACCAGGTGGTGGTGTGTCGCCGGGGATTGGAAGTGTGCTATAAGTACCGTCACTCTTCTCAG                | 4 |
| wt-66540-66660 | 3408 | AGGATGATCTGTTGGAGACTGACGTTTTACTGAACGAGCCTGTGAATCTTGCAATAAACGTTTATTGCCATGTCCAAGTGTGTACGTGCGTGTGATGAGGGCTTTGCCTGCCTAA               | 4 |
| wt-66660-66780 | 3409 | CGGTGCAAAACCACCGCAACCGCTGGTTCGCGGCTCACATTGTCTCACCAGGACTGCGGGTGTCTCAAGTACTCAATGAGAGGGACTTGGAGTTTACAAGTTCTCTTTACGTTCC               | 4 |
| wt-66780-66900 | 3410 | TGGCCATGGCCGAGAAGCTTGTGAACCTTGAACCTTGTGACACTGGTCCAGCCTCTCGAGAGCCAGACATGATCAGTACTACACCAGGAGGAGCCATGGAGAAGCTCCAGGGGAGA              | 4 |
| wt-66900-67020 | 3411 | CTTATGTAACATTTTAAACATGCTCTTTGATGGGACAGGGCGCGATGAACGCCCTACGACAGGGCCATCATGGCCGACGAGGCCCTGCAAGCCAAGATTTCTGGCTCCGTGACAAGG             | 4 |
| wt-67020-67140 | 3412 | TGGCGGCCCGCTCACCTGCCGAGAAGATTCTGTGTTCTGCTGATTGAAGGCATCTTCTTATTAGTCTCTTACAGCATAGCCCTGCTGCGGGTCCGGGGCTTAATGCCTGGCA                  | 4 |
| wt-67140-67260 | 3413 | TCTGCTGCCAATAACTACATAAGTAGGGATGAGTGTCCACACCCGCGCTGCTCCCTGTTATACAATAGCATGACAGCCAAGGCTGACCGACCAAGGGCCACCTGGATCCAGGAGC               | 4 |
| wt-67260-67380 | 3414 | TGTTTCGCACTGCGGTGGAGGTAGAGACTGCCTTCATCGAGGCTCGTGGAGAGGGGTTACCTTGGTGGATGTGCGAGCCATAAAGCAGTTTCTGGAGGCCACGGCCGATCGCATCTGG            | 4 |
| wt-67380-67500 | 3415 | GTGACATTTGGTCAGGCTCCCTTGTATGGCACACCACCCCAAGGACTGCCCGCTCACTCATGACTAGCATCAAGCAAACCTAATTTCTTGGAGCAAGAGTTCGGATTACACCATGC              | 4 |
| wt-67500-67620 | 3416 | TGGTGTAGATGACCTTTGAGTCAGGGTGGCTTCTCGTTGCAAGAAGTGGGCACGCCAGCAAGGCTCAGGCGGCGTTAAGGTGACACTCAATCCGGATCTCTACGTCAACAGTATACTTCTGGG       | 4 |
| wt-67620-67740 | 3417 | CTCAGACTCTCCGCTTAAAGACCAAGGCCCTAGCCGCTCTGTCCAAGTGTATGACCATGCCAGACTCATCTCAAGGGAGGAGTGTGACAGTAAACCTTCTGTGTAAACTATGGAG               | 4 |
| wt-67740-67860 | 3418 | GCCCCGGCTGGCCGCGTGGCCAACGAGGCAGCCGCGGCTAATCAGCTTCGAGGCTCCCTGACGCTGTGGCCGAGTGGCAGAAATCACCAGAGCCAGAGGAGGCCCGGCCGCGC                 | 8 |
| wt-67860-67980 | 3419 | TGTCATTTAGAAACCTTGCCTACGGGCGCACCTGTGCTCTGGGAAGGAGCTGTTGGCTCGGCTGTGGAGCAGGCTTCCCTGCAATTTTACAAGCGGCCACAAGGGGTTCCCGGCCCTG            | 4 |
| wt-67980-68100 | 3420 | AATTTGTTAAGCTCACTATGGAATATGATGATAAGGTGCAAGAGCCACACACTGCGCCCTGATGCCCTATATGCCCGGCCAGCAGGCTGAGGAACGAGCAGATGATTGGG                    | 4 |
| wt-68100-68220 | 3421 | AGGTGCTGTTGATGCCCAAGCGGCTTCTCGTTGCAAGAAGTGGGCACGCCAGCAAGGCTCAGGCGGCGTTAAGGTGACACTCAATCCGGATCTCTACGTCAACAGTATACTTCTGGG             | 4 |
| wt-68220-68340 | 3422 | AGGCCTGCCTCACCTAGACTACAAGCCTCTGAGTGTGGGCCATACGAGGCCCTCACTGGCCCTGTGGCCAAAGGCTCAGGACGTGGGGGCGGTTGAGGCCACGTTGTCTGCTCGGTAG            | 4 |
| wt-68340-68460 | 3423 | CAGCGACTCGCTGGCGGCGCGCTTAGCCTCTGCCGATTCCGGCGTTAGCGTGCCAATCTTGAAGTTTTACAGGTCTGGCATATAGCTGGTGGCCGGCTGCTGACGTCAAGGG                  | 4 |
| wt-68460-68580 | 3424 | GGGACTGCGCTTGGATCTTAGTGTATTTTAAACACGCCCTCCGAAGAGGCGGCCGCCAGTACGGCCTGTAGCCAGAAGATAAAAGTCCCGGGTCAACCACTGGGCACAGGAC                  | 4 |
| wt-68580-68700 | 3425 | TCCAACAACGCCAGACATACGGTCCAGTCCATCTCTTACCCTCCGCCACCTCTAGGACCCCTACTTGGGAGAGTCCGGCAAGGCCAGAGACACCTCGCCTGCCATTCCAGCCACT               | 4 |
| wt-68700-68820 | 3426 | CCAGCAACACCGCACTGGAGAGCCCTTGGCTGTTGAGCTCGCGAGGAAAAGACATCGTGGAGGCCAGGCAGAAAGCAGAAAGCACCCCAAGAAAGTGAAGCAGGCTTTAAACCCCTCA            | 4 |
| wt-68820-68940 | 3427 | TTTAAACCATGTTCTCGTGAAGCAGCACCTGTCCCTGGGGGCTGTGCTCTGTCTCGCCCTCTGGCCAGCACCCCTTCAATTTGGTGTCTTGTCTTGGCAACCTGCTCTCTG                   | 4 |
| wt-68940-69060 | 3428 | GAGATCTTCTACCGTGGCAGACACGCTGTACAGGCTTGGATCCCGACGGCATGCCTAATGGCCGCTCTGGACGCTGTTACCCGCCAAGCAGCGGTGAGGGCCGCTACTCCAGCC                | 4 |
| wt-69060-69180 | 3429 | ATCATGCTGAATATGCCAGCGCCTGATCTTCTCCCTCAGAGTCTACTCGACCAAGCAGTGGGTTTCTGCCCTGTCTTCTTCTGGCCAAACCTGCCTCTTATGCCTGTGGCCC                  | 4 |
| wt-69180-69300 | 3430 | CGGCTGGCCATCGAGATTGTTACATCTGCCCGGCTATACACAAAGGTTCTTGAACCTGGGTTGCTCTTGGCTGACCATCTTGGCCTGTCCGTGGTCTCCAGGGCCCTGGAGGTG                | 4 |
| wt-69300-69420 | 3431 | TGGGCTGCTTCAATGCTCCATTTTTCATCTTCTGGCTTTGGGCTCTGGAAGCCTGGCCGGTGTCTGGCGTAAACAGATTACACCTCGGGTCTCGAGCGAAGCAGCATTTTCTGC                | 4 |
| wt-69420-69540 | 3432 | GCCCCGGGAGATCATTGGTGGCATCCCTGAAGGAGACCCCTCAATAAATGCCCGTGGGATCTGCTGGCCATCTGCTCTGACCCTTCTGTCTGTGATGATTGTTGATGTTG                    | 4 |
| wt-69540-69660 | 3433 | CACGCAGAGGTGTTCTTGGACTCTAGATACCTGCCCTCTTCTCTGTGGGGCAGTGGCCTCCGGGGGCTGACTGGCCATTCCAGCATCATTGCATGTGATGTTGATGTTGATGTTG               | 4 |
| wt-69660-69780 | 3434 | TGCACCTGACATCTGTTGGTATATTTCTCCATGAACACCTTGGACCCCTGGCAAGACCGTGTCTTTATCTCAATCTTGTCTATTACTTTAGCGGGGTAGCGGCCCTGAGCGCA                 | 4 |
| wt-69780-69900 | 3435 | GCTATGCGCTACAAGCTTAAAGAAAGTTGTAACCGACCCCTGGTCCATCTCCGTGGTATACATGCTGCTTTGTCTTTACTTTTGTGAATATCTGTTGGTGGATTCATTAATCC                 | 4 |
| wt-69900-70020 | 3436 | TAACGACCGGAGTCTGTCTTGTGTTCTGGGGACTTGAAGTGTGCTTCTTCTTATTACATTTGGGCTAACCGGAGAAATGAACCCAGGGTGGCAGTGGATGGGCTCATT                      | 4 |
| wt-70020-70140 | 3437 | ATGGGCAAAACTCACAGACATGTTGGGGAGTTAGCATTGGCGTGGGAAACAGACTCTGGCAGTTATAACCGCACAGCTAACAGGACATGTTGGGGAGTTGGCATTGGCGTACAG                | 4 |
| wt-70140-70260 | 3438 | GAGACACGGCTGTGCAAGTATCACCGTACCATGAGTGCATGTGTGCCAGTGCCTAATCACCGTCTCTTCTTGTGCTCTCTCAATGTTCCAGAAGTGGCCACAGGGGAGGTG                   | 4 |
| wt-70260-70380 | 3439 | GCTGAATTAGGGCTTTTCCCTCATTCCCCATGAGACCCACGTGGCAGGCTAGGGGCTACATTCGCTCCACGTTTCCCTTGGCTGAGGCATCCGATGACTGAATTTTCGAGT                   | 4 |

|                |      |                                                                                                                                        |   |
|----------------|------|----------------------------------------------------------------------------------------------------------------------------------------|---|
| wt-70380-70500 | 3440 | CTCTTTTCCCTCTCCCTTGTATTCCCATAAGAATTACAGTGGAGTTACACAGGTGGAGATTACAGTTAACCAATTTATTGATTTAATCCAGGAACAAAAACAGTCTAGTGACCCAGTG                 | 4 |
| wt-70500-70620 | 3441 | CCCGGAGAGAGAATGGCCCTGACAAGTCGCTGCATGATGCACTTCGGCAGTCACTGTTGTAGTCTCCACGCCCTCTGTCAAAAAGGAGACTTAGCGTGCCAGGGTTGTAATTTCTTGATG               | 4 |
| wt-70620-70740 | 3442 | TAGTGGCCAGGAATCAACTTCATCGTGTCTCCGTGCAGTTGGCGTAATGATAGGCTGGGGCTACTGCCGCATATGCTGCCAAGAGACAGAGGGGCTGCTTCACATATGAGCTGCTC                   | 4 |
| wt-70740-70860 | 3443 | AGGGTCTCCACCACCTGTTTTGACGGGGCCTGGACAGAGGTATGTAGAAGAGTGTCTTCAAAAGTTGTAGTCTCCGCTTAGGAAGGAAGCAGGGTGCCAGCTCTTTGAGCTTGGTC                   | 4 |
| wt-70860-70980 | 3444 | AGGATCACCTTGCTAAGACTCATGGCCAGGCCAGGAGGATGTCTCCGGGGAGCTAGGGGCAGGTCCGCTGGGTAGGTATCTCCTGGAGCCAAAAAGATGGTCTCTTAGCATGGCC                    | 4 |
| wt-70980-71100 | 3445 | ACCAGGTGCAGAGCCCGCTTCTGGATCGCCTGCATCGCTGCATCCAGCCATGTGCTCTTTGGTTGACTGTGGTAAAACTCACGTAGTCTTTGTAGCTCCTGGCAGCTCGTGT                       | 4 |
| wt-71100-71220 | 3446 | CTGGGTGCACTTTCTGCCAGGCTCCAATCTCGATCTGGATGGCGACCCGACCCAGTCCACTGTGAGAGTTTCGCTGCCCAGATAGGGTCCAGATCGAGTCTGTTGGTGTGAGCTGAGCCAGGCTGGGCAAGGTG | 4 |
| wt-71220-71340 | 3447 | ACAAATGTAATCTTGAGACAGGCTTAACAGACTCATGTCAAACCCAGGTTTGTTCGGCAGGGGCTCTGGCTGCGTTCCTTGCTCTCGCTGCTTCCTTGCTCTCCGGCCCTCGA                      | 4 |
| wt-71340-71460 | 3448 | GATTCTGACCCGGGACCTCGTGTCTGTGCTTCCGGGAGCTCTGGAGACCTCGTGCTTAGGCACCCCTGGGGGCCCTTGGGGCTCTGGCGCTCTGTCTCCGGGGGAGAGTGT                        | 8 |
| wt-71460-71580 | 3449 | CGGCGCTTCCATAACTTCATCGGTGCAGCCATGGACCTCCTCCGCTGCGCTTTTGTGGCTCTGGTGTAAAGAGGAGTTGCCAGTCTCCTCTCTGCTCCCTGTCACAGGGGT                        | 4 |
| wt-71580-71700 | 3450 | GAGCGATGCAATGTGACTGTCTGTCTGTAGTTCCACTTCTTTCTGGAAATCACAAAATGACCCAGGTAGGGGTTATGACCACGCTGGAGGGCTGACAGGTATGGCTGGGCGGGA                     | 4 |
| wt-71700-71820 | 3451 | GTTGGATCTTCATCCTCCTCCTCCTGAGGATGAAATCTCCTCCTGTGGAGTGTCTTCGCTGCCATAGGCTGTTGAGGAGGCTCTGTTGGTGTGAGACTTCGAGCTTC                            | 4 |
| wt-71820-71940 | 3452 | AGAATGTGGCTCTGCGAGAGGGGAGACAAAAGGTGGAGACTGCCTTAGCACCTGTCTCAGGCACCGGATGCCCCGGCTCCACGGCCCCGGCCACTGGCCGTTAGCTTTTACC                       | 4 |
| wt-71940-72060 | 3453 | TGCGGATCCTCGTTGGAGAAATGCTGCTAGTTCGGGAGAGTCTCTGAGAAGAACCATCTTGCTGTCTTACGACGGCTAGCTGGGATGTAGTGTGCTTGTAGTGGCCAGCC                         | 4 |
| wt-72060-72180 | 3454 | TATTTATGATTTCTGGAGCCGGCACGCTGATGGAGAAATGGCGCTCGGTTGATTGGCCCCACAGCGACCGCCGAAGCACTGACTCATGAAGGTGACCGTGATGGCCTGTGATGTGTAGT                | 4 |
| wt-72180-72300 | 3455 | AGAGTACCAAGAACCCCTCACATTTCTGGAGCTGGCCCTGTGGGTATGCTCAGGCACGCAAGTTCCTGCCCGGGCATGGCACACCTGAACTAAGTTTGGCCGGTTTGCTCAAACG                    | 4 |
| wt-72300-72420 | 3456 | TGACATGGAGAAACTGGGGAAATTTGCTCTCGCACAGCTGTTCCAGGGTGTCTATGAGCAGGGCCAGATGCAGGAGCTGACCAGCCGACGAGATCCAGGCCAGATGTCCCTTA                      | 4 |
| wt-72420-72540 | 3457 | TCATGGCGCAGACATTCTCCAGGTTGGGGGACGGTCTCGCGGCTCTGATTAGATAGTCACGCCCATCATCCGGATGTTGGTAGCAGAAGGTTTGGGGGCCGGACGCCACGT                        | 4 |
| wt-72540-72660 | 3458 | GCAGTGAGTGATGTAAAGGTTTGAATGTTGAGGCACTTAAACATAGCTGTCTTCTCTCCTCCGGATGACAGACAAAGAGCCGACAGTCCGGCTAAGACCACCGCCCTGT                          | 4 |
| wt-72660-72780 | 3459 | CCACCTTGATGATGACGGCAGCCGATGCACCCGCCGGGCTGATACACGCCCTGTCAAAAAGCGGGGCCCAATCTCTTGTATTTGTGACGCATGCCGGCAGGAGCCGTAGGC                        | 4 |
| wt-72780-72900 | 3460 | CCATGAGCTTCTGCAGCACAGACAAACCCTTGACTGCGCTGTCCCAACAATAGCATGGCCTTAGGTAGGGGGGTGATGACGCGAAAGCCAGTTTCCCGTGATATGCAAAAAG                       | 4 |
| wt-72900-73020 | 3461 | GGAGCATCTTCATATTATCCGGTGTCGGGTTGAGCAAGCTGATTTGAAAATAAGACTGGTAGGGCCCTGGACACTGGACCAGGGCCGATGAGCCAGCTACCCACCGCA                           | 4 |
| wt-73020-73140 | 3462 | CGGTCGGGCACAGGTATAGATTTCTCCAGCGACCCAGGGGGCCCTTGATCTTTAGATCCAGTCCAAGACAGGTTGCAGACCGGAAGCCGGGATTAAGATTTCATGCCGGGAGA                      | 4 |
| wt-73140-73260 | 3463 | CAAAGAGCTGCTCGCTCAGGCTGTTCTGTGAATAGTACACTGGGTTGAGGAGGGCCCTGGTGCAGACGTTCTGGGAGCGGAGTTGGTGGGGTGGAGACGACTCCGCCAGT                         | 4 |
| wt-73260-73380 | 3464 | GGGATGAGAAGGGGTGAGCGGCTGTCAATAAAGTAGTGCCTGTCTCGCAAAATGGCAGAGGAAGACCGGTAGCCGCTGCAACCTTTCGAAGGAGCGTGGGTGGGAGGAATGTCTCTGG                 | 4 |
| wt-73380-73500 | 3465 | GATTCCACTGGCCCGGCAGGTGGCCCTGGCCGGCCAAGCATAGAAAACCTTGAAGCGTGGGGGGTATGTGGGACCCCTCATCCGCTGCCAGCGGCGGAGCTCCACCAGCTCCCGGGCCA                | 8 |
| wt-73500-73620 | 3466 | CGTCCACTGAGCCCGGCCAGGCCCATGATCGCTATCGGGTGCGGCTGCCAGTGTATGGGGCCGGGGCTCCATGCCGATTTTTCAGTCTGGACACGACACATCACTGACCCA                        | 8 |
| wt-73620-73740 | 3467 | GTAAGCTCCCGGGTGAAGTAGTGCATGTGCTCCGCAAGCCCTGTCCAGGAGCGAGGGGACCCCGCCGCGATAGTGTAGTGGATAGACGGTCCGCGGTGAGCCGCGCAGGAAG                       | 4 |
| wt-73740-73860 | 3468 | AGTATCGCTTAAAGGTTCCCTCGTGAAGCACTGTGCGTGGGCCAAATAGACGTAGCGCACGAGATCGGCCAGGCCAGGGGAAAGGCCCGCCCTGTAGGCGTCTATCGTCTTGCACAG                  | 4 |
| wt-73860-73980 | 3469 | CGCGGATCTCTCGGAGTCCCGCGCAGTTTCTCGTGCAAAAGTGGGCAAAAGCCTCGGTCTGCTCCGCCATGCCGAGGAGCAAAGACTCCCCAGCTCGGCCAGGAGCTGACGG                       | 8 |
| wt-73980-74100 | 3470 | CGGCCAGGCTGACCCAGCTCGGAAGTAAATAGTCCGTGAGGTGCGCCAGGGTCTAATCGTACAAGGAATGCCCAAAAATAGTAAAGCAGCCGTACTAGCACGAACTGGGCCTCGT                    | 4 |
| wt-74100-74220 | 3471 | GGGAGCAAAGGTGCTAATGAACCACTGGCCGAGATGTTAACCGGTAGATGCGGCGCAGACAGCCACGATCTGGGACGACGACGCCACCGCGCTCGCATCCCCCTGTGGCT                         | 4 |
| wt-74220-74340 | 3472 | GTTTTTAGCGCTCAGTGTGAGCAGTTCCACAGGGGGCTGAGCGAGCGCAGGGCCCGCCCGCGGATAGTGTAGTGGATAGACGGTCCGCGGTGAGCCGGCTGAGCCGCGCAGGAAG                    | 8 |
| wt-74340-74460 | 3473 | GGAAGGCCTCCTCCGCGGAGGTGACGCGTCAGAACCAGGCGCCAGCGGCTCTGTGAGGTGACCGCTTCTTGGGCAAGTGAAGTGCAGTTCACAGAGAGAACCAGCCAGTGGTGGA                    | 8 |
| wt-74460-74580 | 3474 | GGGGCAGGCGTGTGGCACAAAACAAAGCCGGAAGCCCTGTCAGGCGCGGAGAGGATGGCATCGAGGATGGCTCCGCAATGTCAGTGTGGAGCCACAAGGGCCTTGATACGA                        | 4 |
| wt-74580-74700 | 3475 | CGGGGCGGACATTTAAGACCAGGAGGCCCAACGCCGGGTAAACAGAACATGATGGCTTCTATCTCCAGACTGGTCTGTGCGGGCTGCTGGCTTTTGGCCGGCCAGGAATAG                        | 4 |
| wt-74700-74820 | 3476 | ATACAGCCAGTCCCTGAGGAGCCGAGACTTTGAGTGCACCAGCCCTGGCGAGCCGAGATAGATCGGCGCTGCCCTGGTGTGCAGGTGGGAGATTTGTAAGAAATGAGCAGAC                       | 4 |
| wt-74820-74940 | 3477 | GATGGGCTCACTGAGACAGGTTTTATTGCTCGCTGTTCAAGCCAATAGCATCACGGATCACCTGAAAGCGCTTTCAGCGGCTCCGCTGAGAGCTGTCTGGGTTGGTGGAGGCCCA                    | 4 |
| wt-74940-75060 | 3478 | GGTGCCAAAGCTTGGAGCCGTCGCTCAGTCTGGAATACCATGATCTCTGCTGTGAGGTCAGCGCTTCTTGGGCAAGTGAAGTGCAGTTCACAGAGAGAACCAGCCAGTGGTGGGA                    | 4 |
| wt-75060-75180 | 3479 | CAGCCTGGCCCTGATGGAGATGGAGAAGGTGGCCAGGCGCTCAAGATGGACGAGACCGGTGCCCTGGGCGCAAGAGATCTCGCCGTTGTCTCATCGGTGACCAGCCCTCAGCCTCGGC                 | 8 |
| wt-75180-75300 | 3480 | CCCTTTCATAACTCCGCTTTGAGCCCGAGGTGCCACCCCGCTCTTGCACCGCTCCCGTGTGGGCAAGGAGCTCTGGCCACCGGAGCTCTGGCCACCGAGCTCGGTTAAGTACGAACCCAGA              | 8 |
| wt-75300-75420 | 3481 | CTCCACACAAATAAACAATTTATTGGTAAAAAAGGGATAGAAGGTGTCATTGACCCAGGATCAAAACCCCTCCCTGCTCCCTCGAGCGCTCGCTCAGCCACTATCACCCA                         | 4 |
| wt-75420-75540 | 3482 | TGGCCAGCTCGCACCTCCTCGAAGGTGCAGCTGGCCACCTAAAGAGAGATCTGGGGCCAAAGACCCCGCGTCACTGTGGGGCTTAGAAGGAGGTGAGGTGGTGGTTGTAAGT                       | 4 |
| wt-75540-75660 | 3483 | AAACAAGCTGACAGAAAGCGCCGACTTGTTAAGGAACAGGTCTGGTCACTAAAGTTGGTCAGGCTGACGTCCACCCACCCGCGCCACTGCAGGGCTTCACTAGAATACCTGCA                      | 4 |
| wt-75660-75780 | 3484 | TGGCCAGGCCGACCTGCCAAAGATTGCGCCCTGTGGTGGAGATAGAAGGGGGGGCAGGTGAGTGTCTGAGACGCTGATGGGGGAAGAGGGCCAGTCTTTGGCAAGAGA                           | 4 |
| wt-75780-75900 | 3485 | CGTCCAGGCCACGTCCTCGGGGTAAGTGGGGTGGTTGATGGGACCTTGTCTCCCTCATCTGGGGGGTGGCATACTGAAGGCAGCCAGTGGATTTGAGCTCCGATGGACGACGG                      | 4 |
| wt-75900-76020 | 3486 | TGGAGTGTAGCGCCGCTGATTCGGAGGATAGCCGGGTTCCCGCTGTAGCCGGATCGATGTCCAAATGAGACGTGACCCGACGGGAGGTGCTCCACAGCATGAGCCCCA                           | 4 |
| wt-76020-76140 | 3487 | GACCTCGGGTGGCGGGCATAGAGCCCTAGCCTGACAGTTGTGTCTTATCGGGGCGACGAGTGGGTCTTTGTACCAAGGTGAGCCGCTACACTAGCTGTGAGGCAACA                            | 4 |
| wt-76140-76260 | 3488 | CGTGTGATTTGGAAGGCTAGCGTATGTGTGACAGCCCTCCATGGTGTGATGATCTAACACAGAGGACGGCGCGCTATATAAAGAGCCCAAGACCCGCTCTTTACTGCAAAAT                       | 4 |
| wt-76260-76380 | 3489 | GGGGAAGTCTAAGAAAGCCGTTGCAAAAGGCTGTGCCACTGCTTCTCGCCGCCACTGGCTTGTACCGGGGTGCTGCGGCCGGCGCTTCCAGTCCACAAACCGCGCGCGGC                         | 8 |
| wt-76380-76500 | 3490 | TCCCTGACTGAAGCCAGGACAGTCTACTCCTACACATGTAATGCGGACACATCTCGCCTCTTTGACCAGCTTGGCTCCATCTGGGCATCTGACGCTGTCTTAGTCAATAT                         | 4 |

|                |      |                                                                                                                            |   |
|----------------|------|----------------------------------------------------------------------------------------------------------------------------|---|
| wt-76500-76620 | 3491 | AGCCTCAGCCATCTACCTGATGTACGCTGCTTTAAACAAGTTTGTGAACACGCTGCTGACGGATTAGATGGGGATATTTAAAGGGGGCAGCAATCTCGGCTGTTTGACTCTTCTCTG      | 4 |
| wt-76620-76740 | 3492 | TCGTTAAACCAATAGCATGTGAGCTCCACGCAAAAGTCAGATTGCCTTCTGTTAAGGCTGTTGACATGAGCATGGAAGACATGGCCGCCCGCCTGGCTCGCTGGAGTCTGAAATAAGGC    | 4 |
| wt-76740-76860 | 3493 | TCTGAAGCAACAGGTCCTCAGAGGGGGTGCCTGTGCCTCTGCTACCTCTGTTCTTCTGCTCCAGTGCCTCCGCTGAGCCGCTTACAGCTCGACAGCGAGAGGTAATGATTACGCAGGC     | 4 |
| wt-76860-76980 | 3494 | CACGGCCGTTTGGCGTCTCAGGCTATGAAGAGATTGAAGACAAGGTTCCGAAATCTGTTGACGGTGAACCTACCCGCAATGAAATGGAAATATATTGCAAAATCTGACCCCTCCGCAT     | 4 |
| wt-76980-77100 | 3495 | TCAAGTATCTATGTTGGGTGCAAAAGGCCAACCCAGCCCTGGTGAGGGAAACACGACCACGAGAATCAAACGACCCCAACGCCACCCGACGTGCCCGCTCCCGCTCCCGGGGACGTGAAGC  | 4 |
| wt-77100-77220 | 3496 | AAAGAAATGCAAAATTTCTGATTAATAAAATTTTATTGACTTTATACATAGGCTCTCGCGCTCATCATATGGTGGGTGGTGTAGGTATGGGATGTAGACAAGTTACGCCTAAAGGCAGC    | 4 |
| wt-77220-77340 | 3497 | TCCGCCATGACCAGCAGCAGAAAGGGTCAGCACAGCCAGAGGCCACTGCTGAGTACATGGAAGAGTTGAACITGAAGTTATGTTATGTTGGCTGGGTAACAGCACTGGTGCAGGTTGGTGG  | 4 |
| wt-77340-77460 | 3498 | GCTGTGGTAACCGGTGGGCTCGTAAAGTCCAGCGGGGCCAGTTTGTAGAAAGTGTGGGAGGTAGATAGGTGGTGCATTGTATCTCGGTCTTGGCGTAGTTGAATCACCGCCGTAA        | 4 |
| wt-77460-77580 | 3499 | TCTGTGGTGGGCTCTGACTTGTCCGGGCTCCATGCTCTGTGGTGTGCTTTCCACCGGTGGTAGAATTTGGCCTTCCACCTGTTGAGGTGACCGTGGGAACCCCGCTTTTGGCCACTG      | 4 |
| wt-77580-77700 | 3500 | GGGCCCTGGGGCCACGTTGCATTTTGGGGGGCGTGCCTTTGGTGACATTAACCTCCCCGGTTTTGGATGTGGAACGTTTCCAGGGCCTGACGCTTGGCTGGTGGTGCCTGGCCGG        | 4 |
| wt-77700-77820 | 3501 | GGTGTGCGCAACTGGTGGACACATGATGTGTGATAGAGGCTGGTGCACCTGTGTATTTTACCACCTGTGGGTGAGCGGAGGTTAGTAAAGGCATATGTGACGTTGAATTTG            | 4 |
| wt-77820-77940 | 3502 | TCACCTGGTGAGGGGCTGAGTGTCTCGGGTTTGAACCTGGTCTGAGTACATGGAAGAGTTGAACITGAAGTTATGTTATGTTGGCTGGGTAACAGCACTGGTGCAGGTTGGTGG         | 4 |
| wt-77940-78060 | 3503 | TGGCTGGTAACACTGCGGTGGGACTTGTCTCTCTAAGGTGTGGTGGTGGCATTTCCTGCTGGACTTGTCTCCACAGTAGGGCCGGTGGCAATTTGGGTTGGGGTAGTCACTGCT         | 4 |
| wt-78060-78180 | 3504 | GAGGTGGGCTTGTTTTCCCAAGTGGGGCTGGTGGCATTGGGGTTGGGGTAGTCACTGCTGAGGTGGGGCTGTTTTTCCCAAGTGGGGCTGGTGGCATTGGGGTTGGGGTAGTC          | 4 |
| wt-78180-78300 | 3505 | ACTGCTGAGGTAGGACTTGTTTTCCCAAGTGGGGCTGGTGGCATTGGGGTTGGGGTAGTCACTGCTGGGTGGGGCTGGTGGCATTGGGGTTGGGGTAGTCACTGCTGGGTGGGG         | 4 |
| wt-78300-78420 | 3506 | CTGGTGGCATTGGGGTTGGGGTAGTCACTGGTGGGTTGGAGCTGGTGCATGCTGGGGGCCCTTACTTCTGTGCCGTTGCCATGGAGATGGACTGGTGTCAACCGGTGATGCGCTGAC      | 4 |
| wt-78420-78540 | 3507 | GTTGTGCCGGCTGGTGTGGGCTGGTGCATCCCGGGTGCATACAGTGGGCTGTGCTTGCAGGTGCGGTGAGGTTGGTAGGCACGTGAGTAGAGCTGGGTAGACCTGTCTGTGATTG        | 4 |
| wt-78540-78660 | 3508 | GGATCAGCAAATCCAGTTGATTCAAGGTAGGGGAGGTGGTGGTGTCTCGGGTGCCTTGGAGAATAAACCTTGGGGTTGTTGGTGGCATTGGTAGCCGTTCTGTGATAATGAGT          | 4 |
| wt-78660-78780 | 3509 | GTCCTGGGGCCGTGCCAAGCCGAGACAGTAATGTCAAATGTCGGATTGCTCGCAAATGCACCAGAAATATTTCCACACCCGAAGGTGCCCGGAGGTGAGAGTCCATTTGCACCTTA       | 4 |
| wt-78780-78900 | 3510 | AAGTCAGTTTCAGTGTTTGGCCAGGCCCAAAGGCAGTCACTGTAACATTTGGCGAGTTTGCCTCCTCAGAAAGTACCATTGGCAGTGAATAGGTAGCATTGTACCCACATATGTG        | 4 |
| wt-78900-79020 | 3511 | ATGCTGTGGTGTGTGCGGATGCTCTGTGAAGCTGGAATCTCATCAGAGAACAATGTTGGACTGAAATCGAGTAATCTCCCCCGCTCGCCTTCGGTCCATTCCAGAGTAAACACG         | 4 |
| wt-79020-79140 | 3512 | TACAGGTAAGTGTATTGCCAAGAAATCGTGCATCCCGGGTGCATGAGAGGCTGTATGATACCTGTACCAGGTATTGGGGTGGCCAGGGGAGTGTGATGTCAGAGTTCGG              | 4 |
| wt-79140-79260 | 3513 | CCGCTGGGAACATGGCTCTCGTATCCACTGCAGGTGATGTTAAATTTGTTGCTCCGGGAGAACTTGTGAAATTTCCGCACTCCCTATAATACACTCAATATCTATCTCATTACCGAGC     | 4 |
| wt-79260-79380 | 3514 | ATTTCTGTTTTACGCTGAAATTCGAGTCTTGAGCTGACGTTGGCAAATTAAGGGTAGCGTGACATCCAGCCCTGTGCCCTCACTACTGCCGTTATATTGGTAGAATTACAGTTATCC      | 4 |
| wt-79380-79500 | 3515 | CACITTTATGATGGCACTGTTTCTGTATCAGGTACACGGGTTTTGCATTTCTGCATGGTGGCACCACATGGTTCCAAACACATCTTGAAGGTAGACATCTACAGATTCCAGGCTTACT     | 4 |
| wt-79500-79620 | 3516 | TGTTGCTCCTCCGGTGGTGCAGTTAATGGAAGCTTCTTAGACCCGATAGTTAGAGCCAATTCCTGCAACCAAGGAGCTCCAGTAGAAAGAGATTGGTGGCATTCTGAGCCACCA         | 4 |
| wt-79620-79740 | 3517 | AATGCACCTCGAGTTGGTAGACGCTTCGTATGGGGTGTGAGTGGCCAAAGTCAAGATCAAGTTGATGCTTTTCCCGCCGACATCGAAATGATAGTTACATTGACATCTGCCGTG         | 4 |
| wt-79740-79860 | 3518 | CAAAACATTGCATGTGGGGTAAATCGGAAATTCGGGAATCTCAACATTTGAAAAAACCCAGGATCTTCCACCGTGAGATGGATGAGTCAAGGCTCGGATGGTGTACTGACACACAAGCCGTC | 4 |
| wt-79860-79980 | 3519 | TCCATTGTCTCGCCACCGATTTCTAGGCAGCATCCTCTTAATAGGTACAAGGGGGTGCAGTTGGTGGTGGTGCACACTTTGTTGCAGACAAAATGGACAAGGACAGGCCGGTCCCCC      | 4 |
| wt-79980-80100 | 3520 | GGCCCTGGATGACAACATGGAAGAAGAAAGTCCCATCTACCTCGTTGTGCAGGAACAGGTATCGCGGGAGATTGGGAAAATGCTCCTCATAGAGTTATCAGATAGCAGCTCAGAAAAGGA   | 4 |
| wt-80100-80220 | 3521 | AGCAGAAGATGCCACCTGGAGCCGGCCAGAAGGGTACGAAGAGAAGCGGGTGCATGATGCGCGTGGGTGAGTCCAGCAGCAGCCATGCTCCACCCAGCCGGATCTCCCTGG            | 4 |
| wt-80220-80340 | 3522 | GCGAGAAGCATTCTCCGAGGTTTCCACTAGATCTAAGAACACTTCTCAAGCGATTGGAGCCGGCTACGGTGAACATCCATATGGCTAAGTGTGATGTGTTTTTACCATG              | 4 |
| wt-80340-80460 | 3523 | ACACAACAACAAGGTAAGTAATTTGTTGCCGTTGGTTTCAAGCGATCGACACACGAGCCATAGACCAGTTTTCCGATCCAGATTTCAAATACCGAGATGTACATAATGATGCCATGG      | 4 |
| wt-80460-80580 | 3524 | CCATTGACAGGCCATTAGAGATCGTCGGAGAAATCCAGCTTCTGATAGATCAGGCCAAATGGAGACTGCAAACCTGCGCCGGGATGGCCTATGGGTTACCAGGCATACAGCAGCT        | 4 |
| wt-80580-80700 | 3525 | GGATGTACAGCTACACCGATACACAGCAGCTCCACATTCGTACATCTCCAGGCGACACTTGGTGCACAGGTGGCCGTAGGTGTCAGCTGACCTTTCCGCCGGCACCCTTAAGCTGC       | 4 |
| wt-80700-80820 | 3526 | CGCGATGTACCCCGGGATCGCCAGTGGTGTATGTTTCCAGAGCTCCGTGGGTAACATTTGACAGAGCTGTAATCCCGCTACAGATTTTTCTTGTACTATATGCTATACACAGGAGCC      | 4 |
| wt-80820-80940 | 3527 | TCACGAAAATCTGGGAGGAAGTTTAAACCTGACCAGCGTGTTCATTTATGGAATTCCTAGGATTTTGCAGAGAACCGATTTGCTCCTATATCAAGAGCTTTGTCAGCGATGCCCTGG      | 4 |
| wt-80940-81060 | 3528 | GCACCATAGTATCCAAACACCGTGGATCGATGACAATCCTAGCACGGAGACGGCACAGGCTTGGAAATGCCCGCTTCTCCGGGGTTCGTCGATGGGATAGACTTCTTAGAACTGAAG      | 4 |
| wt-81060-81180 | 3529 | GGAAACATGTCGAAGGTGCTACCGGTGAAACGCGAGAAGAAAGTGAAGACACGGAGAGCGATGGAGATGATGAAGATCTTCTTGTATAGTGTCCAGAGGTGGACCTAAGGTCAAACGAC    | 4 |
| wt-81180-81300 | 3530 | CCCTATATTTATAAGAGCTCTGCACAGGTTGCTGCTGATGAGAGCGGGCAAAACGAACAGAGGCAAGGAGGTAAGTGGAAAAGGCCCGTGGGAGCACTTATGGCACACCTAGGCCGC      | 4 |
| wt-81300-81420 | 3531 | CTGTTCCGAAACCAAGACCAAGGTCACCAAAAGCGAGAGACGCTACCACTGACGGGTCCGGCGAAGTCCAGAAACCCCAACCATCACCTAGCAGCTCAGGGAATGGCATAACCCAT       | 4 |
| wt-81420-81540 | 3532 | TACATGAACAACAGGCATGGCCCGGTGTCGGTGTGACAGGCCCCACCTACGCCCTTCCCGCTGATCTCCAGGGGATCAACTCCCAGGTGTTTTAGCGACGGGGAGTGGCGTGTG         | 4 |
| wt-81540-81660 | 3533 | CACCAGTACCAGCCCGGCTGGGCTATTGTCGGGCTGGGAGCCATCCCTGACACAGGCTGGGGGAGGCTTTGACCCCTGTAGACCAACAACATGCCAGTGAAGCCGTCCTCG            | 8 |
| wt-81660-81780 | 3534 | TCCCAGCAGTGGCACTTGGAGCAGCAGTTTACCCCAAGCCAGTTCGTCGGCACCTCCTAAGATTGCTATGACAGGGCCCCGGGAAACTTCTGGCATTAGACGCGCGGGAGCGTTGGA      | 4 |
| wt-81780-81900 | 3535 | GGCCGCACCTTGGAGCCAAATCCACCCGTTCTCCAGTCAAGTGTCCGTGCGTGACCGTCTGGCTGTTTGCCTGCTGAGGCACAGGTCAAACAGGCTAGTGTGAGGTGCAGCCCC         | 4 |
| wt-81900-82020 | 3536 | CCAGTTGACCAAGTATCCCTCAGCAACCAATGGAGGGGGCGTTGGTACCAGAGCAGAGATGTTCCCTGGTGCCTTACGCCAGGTTGCTGATGTGTCGGGACCTGGGGTAC             | 4 |
| wt-82020-82140 | 3537 | CGGCGATGACGACAGTACTTGTACCTCCCCTTAATTCAAACCATTAGCCAGCCGGGGACCCCGTGGCCCGCTTAGGGGCTAGTATGGGCCGCTGACCTCCGGTACCAGCAACACAGCCAC   | 4 |
| wt-82140-82260 | 3538 | AGTATTTGACATCCCTTAACTGAACCAATTAACAGGGGGCATCCGCGCCGCTTTCTCCCTGACCAACCGTATGGAGGGCCGTTGGTACCTGACAGTGGATGTTCCAGGTCGCC          | 4 |
| wt-82260-82380 | 3539 | CCCTGAGCCAGAGTGTAGGCCAAGGGTAGCGCAGTCAACAAATTTTGAACCTCCCTTAACTCAACCAATTAACCATGGGGCACCAGCCCATTTCCCTCCATCAGCCCAATGGAGG        | 4 |
| wt-82380-82500 | 3540 | GGCGTGGTACCCGAGCAGTGGATGTTCAAGGTGCCCCCTAGCCAAAGGCACTGACGTGGTCAACATCAGCTGGATGCTTTGGGGTATACACTCCATGGTCTTAACCATCCCGGG         | 4 |
| wt-82500-82620 | 3541 | TCCCGTGTCTCCTGCCGTTAACCAATATCATCTCAGCCAGGCTGCCCTTTGGGTTACCTATTGATGAGGATGAGAGTGCCGAGGGGTCGATACCTCCGAGCCGTGTGAAGCTCTTGATT    | 4 |

|                |      |                                                                                                                            |    |
|----------------|------|----------------------------------------------------------------------------------------------------------------------------|----|
| wt-82620-82740 | 3542 | TGTCAATCCATGGCAGGCCTGCCCTCAGGCCCCGAGTGCCCTGTTCAGAGGAGGGTGGCCAGGATGCCACCAGAGTCTTATTGTCATTCATGGCAGGCCCGCCCTCGGACCC           | 4  |
| wt-82740-82860 | 3543 | CCGAGTGGCCTGTCAAGGGGAAGGTGCCAAATGTACAGGCCCTGAAACTAGAAAGGTGGTGGTGTGAGCCTGTTTGCATGTGTACAGGATGACGAGTTCCGGATCTACAAGATC         | 4  |
| wt-82860-82980 | 3544 | CTCCAGATGAGGCCTAAGCAAAGGTGTAGAAGTGTGTCCCTCCATTCCACCCACTGATAATACGCCCGACAATAAAGTTGATGATATTGAATCCACACCTGCTTGTTGTGATTT         | 4  |
| wt-82980-83100 | 3545 | TATTTCAATTCATGAGAGACCTCGCATATTTGCAGAAAGGGTCACTGAAACATCTTATCTTAAACAGTTACACCTGAATAATGAAGAAGCGTGGCTCAGCAGAGCACAAGGAC          | 4  |
| wt-83100-83220 | 3546 | GATGCCGGGGGGGCATCTGGCTGGCAGGACCACCAGATTAGGAGATCAAGGTAAATGTGACACAGGTGGGATGTAGCCATTTACACCTGAGATTGGCCCCTTTGAACCTCTCTCGCGCC    | 4  |
| wt-83220-83340 | 3547 | AGTGAGGATGATCTCAATCTGGCAGCTGGAAGAGAAATTTAGATCCCGCTGCAAGAGAGGAAACCTCATGAGCAGGAGACAAATGGTGGCAGATCCCTTGGATGTCACACT            | 4  |
| wt-83340-83460 | 3548 | CGCCACCTAGATTTGTGGATGTGAACCCAACCCAGGCTCCAGTGTCCAACACTGCCAGCAGGTCTTATGATTCCATGTTGGTAAAGAGGCCTAGAACAATTTCCAGATGTTCCGCTTG     | 4  |
| wt-83460-83580 | 3549 | ATTTTTGGCCAGTCTTAATTGATGTCATTTGGTTCAGCAATCGGACCTCGGCCCTTAGGCAGTTTATTCCTTGAGCAAAACCTGAACATCGAAGAAATTTATATGGATGTGCATGACC     | 4  |
| wt-83580-83700 | 3550 | GTGCGTCACAGATGTCAGGCCATCAGAAAAAACCAATACCAATTGTAAGCAGAGGCGTTGGAAGCTCCTGTCATCTTGACGATCCTGGCGTATGGGTACCGCACGACATAACCTCAAA     | 4  |
| wt-83700-83820 | 3551 | GTAACAGTTTTGAGTCAGGGGGGACAATGTCACCCGGTCTTTGTACTGTCTACGCTAGGATGTGATGAGGGACCGGGCATGCAACAACCTACAGTGTGCGCATTGTACAGATACCA       | 4  |
| wt-83820-83940 | 3552 | CGAATATCAGACAAAAACCAAGATCGAAACAGCCTCTCTGATGCCAGTCTGTCTAGTCACTTTGCGCAGAAAGATATACTTTGTTCTTGTGATTTAGTATCTCCGGAACACCCCTG       | 4  |
| wt-83940-84060 | 3553 | TATGCTATATGGATTGGCTGGGCACGAAAAACCCAGTTTCAATTTAGATTTGTAGGATGTTTGAAGAAGGACCACACTCATATACCGGAATGGTTCGCCAGTGCACCCGGGAGA         | 4  |
| wt-84060-84180 | 3554 | CCCAAAGCAGCCAAAGCCATGGTTAAGAGCGCATCCTGTCCGATTTCTTATGATGATCCGTTAAACAAACGAGGAGATTGATCTGGCCTATGCCGCGGGCAGGCCATGAATATTGAGGCT   | 4  |
| wt-84180-84300 | 3555 | CCTAGACTGCCAGATGATCCTATAATTGTTGAGGATGACGACGAAAGTGAGGAAATTAAGCTGAAAGCGACGAGGAGAAGACAAGAGTGAATGGAATCTTAAAAATATACCGCAA        | 4  |
| wt-84300-84420 | 3556 | AACTGCCGTACAATCCAAAGTATACGGCAGGCACGGCTGGTTTGAACGAAAGTACAGTCAAAATCAACAAAAAATGCAAGGCGCATAAGTACTACTTTAGTGAATCAAGGCCATT        | 4  |
| wt-84420-84540 | 3557 | GAAGAGAACACAGAAGAAGAGCAGCCAGAACAGACGAGCCAGGAGGACCCGCTGAATCCAGGCCCCACAGTGGTCTCCAGGACCCACCGCAGCAAGAGCCTGGCCCCGTC             | 4  |
| wt-84540-84660 | 3558 | GGCCCACTGAGTGTCCAGGCTCGGCTGGAGCCATGGCAACCTTTGCCCTGGCCCAAGTACACGAGTCTACTTACGAAGAATCCATGACGGGTGCCAAGTACATGGTTCCGATGCTA       | 4  |
| wt-84660-84780 | 3559 | GACCTTCTGAAAAAGACGATGAAGTCAATGGAGCAGAGGGTTATGGCAACCTACTGCCACCAGTACCACAACAGCCCCGGGCTGGCAGAAGAGGCCCTTGTGTCTTACCAGTACCTA      | 4  |
| wt-84780-84900 | 3560 | GCCATAGAGAGTGTAGGCGCCCTCGACAGAGCCGTTGATGATGACTACTGCTGCCAGGACTGACCCTCTTGAATCCAAACACTAACGTCACCCACGCTCTCAACTTAGC              | 4  |
| wt-84900-85020 | 3561 | AGTTCGGCACCAAGCTGCGCACAACCTCCATGGCCGGTGGTTCAGCACAAGTACAGTCCAGATGACCAACGAAACAGTCCCGGCCACCGGAAACAGCTGCCACGCCAGTGGCCAAATG     | 4  |
| wt-85020-85140 | 3562 | CCCCTGCGACCTATCCCTATGCGCCCTTGCCGATGCAGCCAATCCCATTTAATCATCCAGTGGGCCCTCCCATCAGACACTCAAGTGGAAATAACCCATATAAGGCCACTTTGG         | 4  |
| wt-85140-85260 | 3563 | GCTCAGATAGGGCACATCCATATCAGCTACGCCAACCGGCTGCTACTGACTGCTGTTGGCCAGTGGACACCCGACCTGCGAGACCCAGCAGAGGAGGCGCCACTCCCATGTACCA        | 4  |
| wt-85260-85380 | 3564 | CCTGAGGTGCCACCCGTTCCCGCAGAGGCCCTCGGGGGCGGCCACTCCCACGCACTCCTCAGGTGCGCGCCGTTCCCGGCAGAGGCCCTCGGGGGCGCCACTCCCAGCCACT           | 12 |
| wt-85380-85500 | 3565 | CCTCAGGTGCTGCCACTCCATGCAGCTGCCACTAAGGGCTCCTGCTGGTCAAGAGGCGGCAAAAGCAAAATTTGCGCAATGTTAAACGGGGGCGTCAAGAAAGGGAGACCATCA         | 4  |
| wt-85500-85620 | 3566 | CTAAGTTACAGGCCGCCCTTAGCGTCAAGCCGCTGCGGGCTGGCAGCCCTACCAGGTCGCGCACCAAGTGTGAGGCGCCATTGTCAGCGCCCTATTTCTACCACCCGTTTTGCAGCCC     | 4  |
| wt-85620-85740 | 3567 | ATACAGTTATGGGCAAGGGGTTCCCAACGGCCATGGCCGCTCAGCGGTGACACAGGCGCCCAAGGAAATACCAGGGAAGGAGGGGAGTGGGGCCTATGCCTCCCACCGATTT           | 4  |
| wt-85740-85860 | 3568 | CCGCGCTAAACGAGCGAAGATCGAGGCTATACAGAGCCGAGATCCGCACGCGGGGGCCTCGCACTCTCCCGTGTATCTTGGAGATGTGCCAGGGGCAACGACAGACTCTG             | 4  |
| wt-85860-85980 | 3569 | GAGTGGCGGAACTGCTAAACAGGAAAAGGACATGTTGGGGCTGGGGGACATTCAGATTTCTCCCTCTTCTGAAACATCGAACGATGAGTATTCGCCATGTAAACAAGAAC             | 4  |
| wt-85980-86100 | 3570 | TGGGATGAACCTGGGGCAACAGACTGCCGGGAGGAGGGGGCAGTGATAAGTCAAGAAATTTAGATGAGGTAGAAATTTGCATATTTTACAGCCACCATGGAATCATTGAAGGA          | 4  |
| wt-86100-86220 | 3571 | CAGGGGACTCTAGACAGTCAACCGACAATGAGCGGGGAGATAATGTACAGACTACCGGCAGCATGATCAGGACCCCTGGCCGGGGCTCCATCCAGTGGGGCTTCTGAGAGATTGGTA      | 4  |
| wt-86220-86340 | 3572 | CCAGAAGAGTCACTCAAGAGATCAGCAACCTTTGGGGCAAAAGCAGGGGTGATAAAACAGAGGCTGGATGCAGCGCATCAGGCGAAGGCGGAGAAGACGGGCTGCCCTGTCGGCCAT      | 4  |
| wt-86340-86460 | 3573 | CTTTAGACACGGAAGACAATGTGCCCATGTTGCTCCACAGACATCACACCATATACCAGGAAATACAGGGATGCTGCTGCCGGCTGTCAAGGTGAGTATGCTCAACT                | 4  |
| wt-86460-86580 | 3574 | GGTTCATGGGGCCATTAAGGCCACGTGTGACCCATGTTCCATTAATTTAGCAATCGCACCTGCAAGCGCTATCAAACTGATACTCGATAGTGGTTCAGACACAAACACATCT           | 4  |
| wt-86580-86700 | 3575 | TGTGCTTGTGATGGCAGCCAGGCAGCTTTCAGGACATTCAGCTGGACCCCTGGTTCGCGAGGGGCGTGGTGGTGGCGACATTGGCTTCAACTCTCCCAGCCAACTCGGCCA            | 4  |
| wt-86700-86820 | 3576 | TGGGATATCGTACAGCAACTACGCACATTAACCTCCGTGCTAACAGGGTGGGGCTGACAGCATGATGTTAAGTGCCACATTTGATGCCAAAATCGGGACGAACTCAAAACCT           | 4  |
| wt-86820-86940 | 3577 | TCTCTGCCACCGTGTGGACACACCCCATGCTGGACAAAGAGAGCAAGAAATACGCTCGGGAAGCGGAGTACGCTTCCCTTCTGTGTTAAATGGCAGAGGGGCTACCGAAGATCTATG      | 4  |
| wt-86940-87060 | 3578 | ATTTGATAGAAGTGTGGCTCTGCACCACATCTGGCAAACTGCTCCAGACCAGGAGAACCTTTAGATTCTGCTGCTTCATGGTGTGATGCTCCAGTGCATAATCCAGCTG              | 4  |
| wt-87060-87180 | 3579 | TGAATTAAGCTGTTTCAAGACAATCGAAACTTTAAGCCATATTAACCCTGGAAGTGAACACCTAAATGAAAATCCATATCAGCGCGGAGAGGCATAAAAGAACAGTAAATCCAGAACG     | 4  |
| wt-87180-87300 | 3580 | CATTTGAAAAGGCACAAATACAGGGTTATCAATGTTAGCAACGGGAGTGAACCCAGAGGTGATGCTACTAGTAAACGAGCAGTGTAGGACACCGGTAGACAGGGTTCCGAGCTGG        | 4  |
| wt-87300-87420 | 3581 | AGCTAGAGTCTCGGACGATGAGCTGCCATATATCGATCCCAATATGGAGCCGGTTCAGCAGAGGCCCTGATGTTGTTGAGCCGTGTGCCTGCAAAGAAACCGAGGAAACTGCCTGGC      | 4  |
| wt-87420-87540 | 3582 | CCAGCGCCAGACGCAACCAAGTGAAGCGCACAATGTTAAGACCTCTGATAGATCTGATAAGGCAAGAGCAAAAGCACCCTGAAAGCGCGGGGCCCTCCGAACAACTCAGTAGCCG        | 4  |
| wt-87540-87660 | 3583 | TGGAGCCCGCCACCCGACCCGTTGGAGATGCCAATGGTATTCTCCATCAACCACTCCAGTCCCAACCGGTTCCAGTCAAGCCTACGCCACCCTTCCTGAGGAGGAGGGAG             | 4  |
| wt-87660-87780 | 3584 | CGTGTGTTGACGACGATGATGTCATAGAGGTATTGATGTTGAAACCCAGGAAGATTCTGTCAGTGTACAGCCAATAAGCCACACTCGGAAGACATCAAGACGGCTTCAACGGT          | 4  |
| wt-87780-87900 | 3585 | CAGGCGACGTCAAAAACGAGCGCGCCTCCCACCGTGAGTCTTCGGATACTGGCCCTCTGCCGTGGGGCTCCTGCCGCGGGGCCCTCCTGCCGCGGGGCCCTCCTGCCGCGGGGCC        | 8  |
| wt-87900-88020 | 3586 | CTGCCGCGGGCCTCCTGCCGCGGGCCTCCTGCCGCGGGCCTCCTGCCGCGGGCCTCGCATACTGGCCTCTTTCGCTGGGCTCCTGCCGCGGGCCTCACATAGTACGCCCTCCTCGCGCGGCC | 12 |
| wt-88020-88140 | 3587 | GTATAATGGCCCTCCCGTCGTACGTATGTTTATGAGGGAGCGACAGCTCCCCAGTCCACCAGCCGTTAAACCTCAGTGTCTTGGGAAATGCGGGCTGGTGTGAATACACAAATGC        | 4  |
| wt-88140-88260 | 3588 | AACAAGAACCAAGTTCACACCTCGAGTCCGCCACTCAGCTCAACAGCCTGCCCACTGAGTGGCCCATCAGTCTGCCCTCTCGTGTGATGGTGGTCAAGGCCAGCCCATAGAAA          | 4  |
| wt-88260-88380 | 3589 | GTTCAACTTGAGTTCGATTCGCCACACAGCCGATGTCAGCAGAGCAACCCGATGAGGATCTCAGCTCCTCGGATTAAGTTCATCCAGCTGGTGGTTCACAGG                     | 4  |
| wt-88380-88500 | 3590 | CTCCCCAGCTCCATACCAGGATACCAGGAGCCCGCCGCCAGCTCCATACCAGGATACCAGGAGCCCGGCCCCCGCCGCTCCATACCAGGATACCAGGAGCCCGCCGCC               | 8  |
| wt-88500-88620 | 3591 | ACGGGCTCCAATCATCTTCATATCCAGGATATGCGGGTCCCTGGACCCCAAGGTCTCAACATCCATGTTATAGCCACCCCTGGGCACCATGGTCTCAAGATCTGTGCATGGGCACACC     | 4  |
| wt-88620-88740 | 3592 | AGGGTCCATGGGATCCAGGGCACCACATCTCCACCTCAGTGGGATGGATGTCAGGACATGGCCAGGATCAGTCTCCAGTCCCAGATCTGCAATCGGAGACAGGCCACCACGTC          | 4  |



|                |      |                                                                                                                            |   |
|----------------|------|----------------------------------------------------------------------------------------------------------------------------|---|
| wt-88740-88860 | 3593 | TTCAACTTTCATTGGTGCCACTGGTCTCATCTCTGCACCATCATGGTCTATCTCCCAGCCCGGAGCCCCATACGCCCCATTCCAACAAGATTCCCCTCCCCATGCGGTTACAAG         | 4 |
| wt-88860-88980 | 3594 | ATAGCATGGCCGTGGGGTGTGACTCATCAGGTACAGCATGCCAAGCATGCCCTTTGCCAGTGATTACAGTCAAGGTGCATTTACCCCACTGGACATTAATGCCACCACGCCAAAAAGGC    | 4 |
| wt-88980-89100 | 3595 | CTCGAGTAGAAGAAAGTTCTCAGCGACCTGCCCGGTGTCCCAAGCTACTGCTGAAGCACAGGAGATTCTCAGTGACAATTCTGAGATCTCCGTGTTCCCAAAGGACGCGAAGCAGACTG    | 4 |
| wt-89100-89220 | 3596 | ACTACGATGCATCCACTGAAAGTGAGCTAGATTAAAGGGATCCAAAGGTGACCCCTGTAGCTATTTGATCTTTGACTGACACATAAACATGGTTAAAGGAATGAACACTCATGGTGTGAG   | 4 |
| wt-89220-89340 | 3597 | ACTGGAAGTACTAAATTTGCTGACATATGTACAATGAGAGCCAAAATTTGATAAACCTTAAAAGTCCCCCACTAATGATGTCCAGTTCCCTTCTCCCACCTGTACACCCCGACC         | 4 |
| wt-89340-89460 | 3598 | CAAGGGACTCAATGGCATTAGATTCTAGTTACCACAGGTAGAATTCGGCCATGTGCCCATAAAAAAGTGCATGGATATAGCTTGCACAGGCTTGGAAACACCCATTCCAGGTG          | 4 |
| wt-89460-89580 | 3599 | TGCTTCTTTTTGGTGAATAAAAAACAGCATCCCTTTATATGAAATGTGTATTCTCTGGTGTGCAGTATGACTGACCTCACGGTATAGTTTTGGGTATAGTTTTGGGGTGAATGTGTGCGGGT | 4 |
| wt-89580-89700 | 3600 | GGTGTCCAATGTGGCAGTTTTACCTCTTTGTCCCCATACTCTGCTCGGCCGTCTTGTAAAGTTAACCGCGCGTGGAGGATCCACCGGCCAGACCTCTACATTTGGTTGGGTACCCAG      | 4 |
| wt-89700-89820 | 3601 | GTGATGGCCGCGCTGCCACCCGCCCTCCTCCTTACCTGGGTGGCAAAAAGTATGCCAGGAGTAGAACAATAACAAGTGCATGGCGGTAACAATGGCACCCCTCACCTGCTTAAAT        | 4 |
| wt-89820-89940 | 3602 | GAAACCATGGCAACCATTCAAAGAGAGCCGACAGGAAGATATTTAATATTCCATTAGTAAACGAGCGCTGAAGCAGCGCTGGTTCAATAACGGGAGTTAGAAAATTAAGAGATCC        | 4 |
| wt-89940-90060 | 3603 | TCGTGTAACAACATCTGGTGTCCGGGGATAATGGAGTCAACATCCAGGCTTGGGCACATCTGCTTCAACAGGAGGCCAGCCTGTCAATTTTCAGATGATTTGGCAGCAGCCACTCGGA     | 4 |
| wt-90060-90180 | 3604 | CAAAAATCAGGCGTTTAGATGGGGCATTATGTTGGGACGCTAGCCCGCTGGCCATTCTGTTAGTATATACCTGACCTCACGGTAGTCTGCAGCAGTTGCTTAAACTTGGCCCGCAT       | 4 |
| wt-90180-90300 | 3605 | TTTCTGGAAGCCACCCGATTCTTGTATCGCTTTATTTCTAGTTTCCAGATCGCATTCTCCAGCTGCGAGCAAGGGAATGCGTTACTACAAGTGGTGCCTAGTCAAGTTGAAACAAGCCCA   | 4 |
| wt-90300-90420 | 3606 | CCATCCGCTGCCGCCCTCCATGAGCCACCGTCCGCTGCCGCCCTCCTTAGCCCTCCTTACCGATTCTGGCTGTGTGGTTCCGTGTGCGTGTGCCGGGGCAGCCACTGGTGC            | 8 |
| wt-90420-90540 | 3607 | AGGCTGTGGAAACCAATGTCTGCTAGCTGTTGCTCCTTGGTGTAGCCCGGGGCAAGCAACACCACTGCTGCTGCTGTTTGAACAGTAGAATTGTCTCCAGGTTGAGGTGCTTCCCC       | 4 |
| wt-90540-90660 | 3608 | GGCTTGGTTAGTCTGTTGATTCTGGTATGTGCGGAGACTGGGAACAGCTGAGGTGCTGCATAAGCTTATAAGCATTCTCAGGAGCAGGCTGAGGGGCAGAAAACACGACCCAGTCCG      | 4 |
| wt-90660-90780 | 3609 | AGCGGTTGAAACATGATAGCGAGTTAGCTGCCCTTGTGGCAGAGCTCTGGCAGCACCCGCGCACAGCACACAAGGCAAGGAGCTTGCATGGCCCTCCAGGTCCTGATAGACTCTGGT      | 4 |
| wt-90780-90900 | 3610 | AGCTTGGTCAAAGCTTGTACAAAAGGCACCTGGTATGGGTGAGGTGTAATTTTACATCTCAGAAGTCGAGTTTGGGTCCATCATCTTCAGCAAAGTAGCAAAGGTGGCCGGCAAG        | 4 |
| wt-90900-91020 | 3611 | TGCAATGTTTAGTGAGTTACCTGTCTAACATCTCCCTTTAAAGCAAGGCACCAGCCTCCTCTGTGATGTCATGGTTTGGGACGTGCTAAATTTAGGTGTGTCTATGAGGTACATTAGC     | 4 |
| wt-91020-91140 | 3612 | AATGCCTGTGGCTCATGCATAGTTTCTAAAAGAGGAGGAGCAGTTTTCAGAAGTGTCTAAAATAGCTGGTGTCAAAAATAGACAGCCAGTTGAAATATGCATGGCATGCAGCAGACA      | 4 |
| wt-91140-91260 | 3613 | TTTCATCATTAGAAATGTATCCAAGATTTCATTAAGTTCGGGGTTCAGGGGGAGTCCAGATTCAAATCCTCTGTGATGGACTAGTGTGTGGTTCAGTTTCGTTCCAAATGGCCACGAG     | 4 |
| wt-91260-91380 | 3614 | GGCGGGTGGCTCAGGTCCATCTGTCCACATTTGCTCCTCTTCTGGGGAATAACAGTGTGACCCCTTAGGGCCTTACGCGCTTACGCGGTTTCTTTCATCAGGGTCTC                | 4 |
| wt-91380-91500 | 3615 | CAACAGATGACTTCCCTCGGGGTTACTGCGGGGGCCGGTCAAGTGGCTGGGGCACCAGGGCTGGCGTTAGGGATCCGACCGGTTTCATGGACAGGTCCTGTGGGGTGGGAGCCAAAAGA    | 8 |
| wt-91500-91620 | 3616 | GGCAGGCAGGGCCGGTGGCCACGGGATCCGGGTGGATGGAAGGCCTGATCCTCTTGGTGTACACACCTCTGCCCTCGAACACGTCAGATATGGCACTGCCGCTCCGGCTT             | 8 |
| wt-91620-91740 | 3617 | TGGCAGGAACATACCTTCCCGCTATCCCTGAGGCCCTTCTCCTTTAACGGGAGGAAGAAAGTGGGCTTTGAGGGTGGGGGAATAGGGTCTCTCATCGCTCTTGGTGGACCGC           | 4 |
| wt-91740-91860 | 3618 | TGCTATCCAAGGCTTTCAGGTTCCGCGCGTGGAAAGGACATGGAGTTTACCACGGTGGGCTGGATGTCCGCGCGCACTTTGGGGCCCGAGGCGCGGGGCTCCGCCCTGGCCCTC         | 8 |
| wt-91980-92100 | 3620 | GAGTTTCATCTGTAAAAGCATGAAACTGTCCGACTCCGAGTAGCGGGCTCGGTGTGAGAGGCACCCCCATCATTTCCCATGAGCTCCTCTGTCATCCTGTCCGCTCCGACACAGGATG     | 4 |
| wt-92100-92220 | 3621 | AGGAGTTTCCACTGCCCTTGGACTTGGTTGACAGCAGGCACCGGGAAGCAGCCCTCAGTACGCTCTGTCCCGCTGGCTGGAGTAGGAGGCGCGGCAAGTGTCTTAATCAGAGC          | 4 |
| wt-92220-92340 | 3622 | CCTGACATCCTTAACATCGTCCGTGAGTGGCCTGTCTTGGCAGAGACCATAGTCTGGAACATCTCCTCGAGGACGGGATAGGTGAACACCCACTTGCAAAAGGCCTTGAACCTGGAGCT    | 4 |
| wt-92340-92460 | 3623 | TAGGAGGCCCTTCCCTTCCATCCTGTTTCCAGTGTCCACTACCTGCTTCCGGAGGCCATGATGGCCGCGCGTCCAGCCAGCACCTTGTGTAGGTGTAGGCCCGCACCCGACTGTG        | 4 |
| wt-92460-92580 | 3624 | TTTTAGGAGCTTGTACATAGCGGTGCCATGGTGGCAGGAATCATACCCGGTGGTGGGGCCCTGGATGAAGAATCTGTGAGTACCACATCAGGTGGTCTAACACGTAGCCGATCAC        | 4 |
| wt-92580-92700 | 3625 | TATAGGGCAGCGATGGAACATCGTCTGTTGCCGGCATTCTCAGCCGCTCTTACCCCTGTTGTTTGGAGAAATGGCCAAAATTCAGATGTTGAGCGTGGCCATTAGCCCGCCCA          | 4 |
| wt-92700-92820 | 3626 | TTCTCGCCCGTGGCCCTTGGCCCTATTATAAATGCCCTTGCATATTTGTAGGATCTCAGAGTAATCTCCACACTCCCGGCTGTAATTTCTTGTGAGGACGTTGCAGTAGTCAGAGAC      | 4 |
| wt-92820-92940 | 3627 | CAGAGAGCCAGCTGCTTTTTGATTTACAGGAGTTAGCCTCAGAAAGTCTTCAAAGCCATCCTTTTTAGGCCATCGGCTAGTAGTAACAGAGGAAATGCCCGACCTAAAATCTTTCCT      | 4 |
| wt-92940-93060 | 3628 | CCATGAGCTTTACCTGAAACACTATCCGAGAGTGGGGATGTGGTGCATCTACTGAACACCATCGGGTGCAGTGCAGCTCCCACTAGCCACCCACTCCTGACAGCCAGAGGGGGCT        | 4 |
| wt-93060-93180 | 3629 | GTTCTGGCAAGAGTCTTGCAGGCTGTACACGAGCACAAGCTGTGGAAGACACCATCGTCCCAAGATCTTAAAGAAGCTGGCTTATTTCTTAGAGCTGTAAGCTACTACTCCCCAA        | 4 |
| wt-93180-93300 | 3630 | GGATGAACAGCGTGACATCGCCGAGGTTCTTGACCACCTCAAAGCAATCGGGACTGGGGCTGGACGACAGACTTGGCCCTGATTAGGAAACTGCCCAAGACAGACACCATGCCTC        | 4 |
| wt-93300-93420 | 3631 | TGTAATGTCTCATGCCAGGAAGCGACTACACAGCCGTGTCGCTGCAGTACTACGACGCACTCCATAGGTATGAGGAAGTAATCGCGGATGTCTGCCGAGTGGCTATGCCCTCAT         | 4 |
| wt-93420-93540 | 3632 | GCCCTCCATGACGGCCACGCACAACCTCTCCACCAGCTTGTGATGGCGTCCGGGCCAGTGAGGAACCGTGCAGCTGGCCGCGGTTCTTAAACAGTCTCCTCTGGACTGTGGCCCT        | 8 |
| wt-93540-93660 | 3633 | CTGCAAGTTTCCGAGATGCATTTACTATAACTACATTCAGGGATCTATAGCCACCATCTCCAGCTTCTGCACCTCGAGATCAAGGCCCTCTGCAGCTGGATAATATCCAGGATGGCAT     | 4 |
| wt-93660-93780 | 3634 | GCGCCTCTTCAACACAGCAGCCCTCCTCCTACCCCTTGGGAGAGCGTGGCCGCAATCAGGAGTACGGATGCCATTACCTGCTGACTGCGCTGAATACATAGACCTACTAAAGCA         | 4 |
| wt-93780-93900 | 3635 | CACAAAACATGTCTTAGAAAAGTCTTCCCATGCAATACAATAAATTTCTCTTACCTGCTGTGTTGTGTAGTGGGTTGTGTCTGTATGGTATTTACTTTAAAAGGGCCGGC             | 4 |
| wt-93900-94020 | 3636 | TGACATGGATTACTGGTCTTTTATAGCCATTGGCATGGCGGGCAACTCGCAATATAAAACCTGACCATCACATGGGCATTAGGCGACTCGCATGCATGCATCGCTTAAGTATGAGTG      | 4 |
| wt-94020-94140 | 3637 | GGCAGCAGAGAGGCTCGGTTATTTGGTCTGAACATCTGGCTGGGGCATTAACTAAGCTTATGAGCGATTTTATCACAGGACAAGTGTCACTCTTCTGGAGGAAATATGCAAGTCA        | 4 |
| wt-94140-94260 | 3638 | AAATTCGCGATGCTATAAACAGACCCCGGGGGTGGTATGTAGCTATATCTTCTCCTGTTGCTTTATGGAATGCCCTCCCAACATCTGGTAGACAATCTCCAGGGACGATTTAA          | 4 |
| wt-94260-94380 | 3639 | TCCCAGCCCGCTGCAGGCCCTTAAACACGGCCACAACTTATGTCTGGGTGTTATCCAGGTGAGACCTCACACAAGGACACACCCGAGTCAATGCTCCGGCTATCGTGACGGGTCTCC      | 4 |
| wt-94380-94500 | 3640 | AAAAATTTGGGTGGATTCTGTCGGATGTCCAGAGTCCCTACAATGTCTTAAAGGATTGAAGGCAATTAAGCCCGGCTTTATGAAATCCCTAGGATAATACCACACTAAGCAGTGA        | 4 |
| wt-94500-94620 | 3641 | GTCCTGTCAATCTCCTGAACATGGTCCACAGCTTGTGGCTTACTGTTGCTGTGAGGCTGCATACAGCCCGTGTCTGACGCTGACTTTCAGGAACTCCCTGACCTGCATG              | 4 |
| wt-94620-94740 | 3642 | ACTCCGATGCTGTTTTCGACAGCCTTATTGGCAGCCTTATTTACCTCAATATGTTCTTATTCTCAAAGTACATAACACAAGACTCCATGAGCTTGAAGCAGGCCCTCAGTGGTC         | 4 |
| wt-94740-94860 | 3643 | ATTGGATGCTGCCACGGGCAACCCCTGCCTGCAGCACCAGAAACCTGCGAGACTCTTGAAGCTTCCGAAATTCGGATAATCACTTTTATCTCCGACGACAGGGCCTTAAACA           | 4 |
| wt-94860-94980 | 3644 | CCTTCAAATTTCCCGAAGAGCTTGGGGCGGTTGTTGTTATGATTCCTTCTTGTGTCGCCAGTACAGTTCAGGACGTTATCACCATGGTGTGGGGCGGTTCTCCTGCTCCT             | 4 |



|                  |      |                                                                                                                                    |   |
|------------------|------|------------------------------------------------------------------------------------------------------------------------------------|---|
| wt-101340-101460 | 3696 | TGTGCACGGAAAGCGTTCAGCTTCGTCCACCACGATACATTGGTGGTCCATAGCTGCCCTGGTGCATGTCTCTCAGGACCTCAAAGGGGGGGCCAGAGACTCCCAGTAGAGCCCC                | 4 |
| wt-101460-101580 | 3697 | TGGGCTTGGTTCGCCTGAACCTCGCGGCAATGTCGGAGAGTACCGCCAGTATTTGGCCAGTCCCGCCCTGGAGTTCCCTTAGGGCGGCGTCCGTAGAGCGACCATGACTGCTGACCC              | 4 |
| wt-101580-101700 | 3698 | GCTGCGTCATATTTATGTGGCGCTCTTGAACCCAAAGGCGCTATAGACGGTTGGCCAGTAGGCTCGGAGTGTCTGGGAGAGGTTCTGTGCGGCCACGGTTGTGGTCCCCTGACCAGGC             | 4 |
| wt-101700-101820 | 3699 | AGTCCATCGTGTGGTGGAGGACGCTAACGCTGGTGTCTTGCAGCCGCCCGCGTTCGCCATAATTACATAGGCTGAAAAGGGCAGGAAAGGGGGCTCCGAGAGCTCCGGGTCAAACCTCGG           | 4 |
| wt-101820-101940 | 3700 | GGGAGAACGCTCCATATCCGGGAGTGTGGACGCGGCCCTAGCCAGGGCCCTATCCCTCTGACTATACGCCCTCACGGAGGGCTGTGAGGTCAATGTTCAACATGAACCTGGACGAGA              | 4 |
| wt-101940-102060 | 3701 | GCGCCTCTGGCGCCCTCGGCTCGGCCATCTCTTACCACCCAGCCCGCTCGGTCAGCTTTTGGATGACTGTCAGGGAAAGTACGCCCTACGTCCAGGGACAGACCATCTACGCCA                 | 4 |
| wt-102060-102180 | 3702 | ACCTTCGCAACCCCGGAGTCTTCTCGAGCGCTTACCAGAACTTTTACCATGTCCTACCAGCAGCTGAGCATGCGACGTACGATGACGTGCTACATGACTGGAACCAAGTTTCGAGCCCTGATCC       | 4 |
| wt-102180-102300 | 3703 | AGAAGCGATGGCCGAGCGATGACTCGTGTGCGAGCCGGTTCGTGAGTCCACCTTCGAGTCTGGTCCACGACCATGAAGCTGACCGTGCCTGACCTGCTGACCACCAACATCTACCGAG             | 4 |
| wt-102300-102420 | 3704 | TGCTACACAGCCGCTCCGTGCTCTCTATGAGCGTTATGTGGACTGGAATCTGCGCCACCCGGCATGGTGCCTCCGTTAAGAAGCCATAACCCAAGAGCTCCACTCCAAGATAAAGAGCC            | 4 |
| wt-102420-102540 | 3705 | TGAGGGACAGGTGCGTCTGCGGAATGGGGACAGGAGGACCATCAGGAGTATCGGGACGGAATATATGAGGCAACGAAGGAAATAATAGAGTCCGCTCAACTCCACCTTACATCCCC               | 4 |
| wt-102540-102660 | 3706 | AGTTTACGAGGTGACCATCGAGTACCTCCGAGGAGCAGAGTATGTGGCTACTACTGTGCCCGCCGATCAGGCTGCATGTCTTCCCCCGGCCATTTTGGCGAACGGTGA                       | 4 |
| wt-102660-102780 | 3707 | CTTCGACAGCCCGGTGCAGCGCTTACCAGAACTTTTACATGTGCTACCAGCAGCTGAGCATGCGAAGTCTGCCAGCTCCTGAACACGGCCCTCAAGGCCATCGTGGGCCAGC                   | 4 |
| wt-102780-102900 | 3708 | GGGGCGAGACATGTACAAGGACATCTGGCCATCTGGAGCAGAAGTCCACAGCGCAAGGACCCCAAGAAGGAGCTGCTGAACCTGCTGGTCAAGCTCCTCGGAGAACAAGACCATCAGCG            | 4 |
| wt-102900-103020 | 3709 | GGTCCAGGACGTGGTGGAGGAGTTCATAACGGATGCCTCAACAACCTGGTGGACCGCAACCGTCTATTTGGCCAGCCCGGGGAGACAGCTGCACAGGGCCTAAGAAAAAGTCTCCA               | 4 |
| wt-103020-103140 | 3710 | ACACGGTGGTCAAGTGTCTGACTGATCAGATAAACAGCAATTTGACCAGATTAATGGCCTAGAGAAGGAGAGGGAGCTCTATCTAAAGAAGATCCGCTCCATGGAGTCTCAGCTGCAGG            | 4 |
| wt-103140-103260 | 3711 | CCTCCCTGGTCCCAGCGCAACAACCCAGCGCGTCCAGCCCCCGCCAGTGGCGCAGAAGCCCGCTGTAGATATACTGACGGGCGACCCGCTCCGCAATCGAAAAAGTGTTC                     | 8 |
| wt-103260-103380 | 3712 | ACTCCCGTCCGCCAGCCTGGGTGCCAGGGTGTCTGGTCACAATGAAAGCATCCTAAACAGTTTCGTTTCTCAATACATCCCCCTTCGCGGGAATGACTAAGGATCTGACTGAACCTT              | 4 |
| wt-103380-103500 | 3713 | GGGAAAGCGAGCTGTTAACACCTCAAGTTAACACCCGTTGGTATAATCAGGGGACGCTCTCTACGTCAGATACTGTCAGACACGATCTCTATATTATGGGCCCTTACCTATC                   | 4 |
| wt-103500-103620 | 3714 | TGGTGGCAGAGCTTTCACCGGTGGAACCTGTCAGACAGTCTACGCCACCTAGGCATCGTGAGATCATCGACGAGCTTACCAGGACAGTCCGCTGGCCATCTACATCGAGGACCTCG               | 4 |
| wt-103620-103740 | 3715 | GTCAAAAATCTGCCCGCAGCGCCACCGGGGGAGATCATGGCATCCGGCAAGCACCATCAGCCCGGGGGACACGGAGCCTGACCATGCAAAAAGTAAAGCTGCGCGTGACCCCCCGC               | 8 |
| wt-103740-103860 | 3716 | CTGGTGTGGAAGTTAACCGCCATAACGCCATCTGCTGGCCACCAACGTCCTGAGTTCATAATGCCAGGGGGGACCTTAAACATCCGAGACCTCCGGGCCACGTCAGGCCCGGATG                | 4 |
| wt-103860-103980 | 3717 | ATCTCGTCCCAGTTTGGCGGTACGCTCCTGAGTGTCTGGACTCCGAGCAGCTGACCCACCTCAACATATTTCCCCACGTGTTCTCCGAGAGGATGATCCTGTCAAAACCCAAC                  | 4 |
| wt-103980-104100 | 3718 | AATGTGAACCTTATGGAGATGTGCGCCTGCTCTCGATGATTGAGAATGCCAAGAGCCCTCCATAGGCCCTCTGCCGGGAGTGTGGTCCGCTGACCTCTTGCATCCAAGTGCAAC                 | 4 |
| wt-104100-104220 | 3719 | AATCTGGACTCTGTTTCTGTACAATGGGGCCAGGACGCTGCTGCCACCTGGTCAAGTACCAGACCTGGAGGAGGGGCTGCCACCCCGGGCCGTGAATGAGGGCTGAGTCTC                    | 4 |
| wt-104220-104340 | 3720 | TTAAGCTGCACAAGGAGCTGAAGCGCCGCCATCCGAAGCCGGGACCTCATGCAGAGCCTTTTCTGACCTCGGGGAAGATGGGTGCTGCCCAGGTACCCAAAGGATTACTGCGCG                 | 4 |
| wt-104340-104460 | 3721 | GATCTAAACAAGGAGGAAGTGCACCTCGGGCTTACATTTAACCTGTTTATCAAGATTCTTTATGACCAAGCATTTCAGTGCCAGACCCCTCCAGACCTTGAGACGCAAGTGC                   | 4 |
| wt-104460-104580 | 3722 | CTCGGGAGTGACACGGTCTCAAAAATAATCCCTAGAATAAACTGAGAACAGTATCAGTAAATGTCTCTCGGTGATTTCCATAGGAATGGTGTAGCCGGGTGGAGGGCCATATC                  | 4 |
| wt-104580-104700 | 3723 | ACATCAAGCAGAAAAGGCCATAATCTCTCGAAAGTAGGCGGTGGGGCTGAGACCATGCTCAAGTGGCCGTGTAGAGGCCCCCGAGTCCCGTCCGCTGCTGAGGTGCCATAGCCGTGAAGGGCCGACGCTG | 4 |
| wt-104700-104820 | 3724 | CCAGAGAGGCGCAGCCAGCCCTCCGAGCCGCTGAAGCCAGGCTCGCGGAAGAGCCAAAACCTGTTTCGGCGCCCGGGGGCCAGTCTCCGGGTGAGTCCGCGGACAGGGTCAAC                  | 8 |
| wt-104820-104940 | 3725 | AGGTGGTGTGGGATGGCGGGGCTTGTCTGCCTCGGGTCTCGCCGCTAGTGGTCCAGGGTCCAGGAGAAGGCTTCTGCGCAAACAAAAGGGCCCGAGTGTCCCTACATCCACCC                  | 4 |
| wt-105060-105180 | 3727 | CTGGCATCTCCGAGTCTTTCACGCCTTGCAGGAAAGCCTAGGAGATACAGCAACAGAAAGCTATTAGCCGGTGGTTCGCCACCATCTTCTCTGTTAACGGGAAGATAAGAGTTG                 | 4 |
| wt-105180-105300 | 3728 | GGCAAACCCGGGGCCGCGCTCCACCCAGCCCGCTTCTACCTGTGCTAGTGGTCTCTGAAGGATGGGCGGAGTGGTGGCCAAAAGCCAGGATGAACCTGCTGCATAAG                        | 4 |
| wt-105300-105420 | 3729 | CCCAGGTACGCTTAGGTACGCGCCCGGTGTAGGAGAAACCCGGGTGACGGCGGTGTAGAGGCCCCCGAGTCCCGTCCGCTGCTGAGGTGCCATAGCCGTGAAGGGCCGACGCCAGG               | 8 |
| wt-105420-105540 | 3730 | TTTGGCGTCCCGCCCTGCCCTCCGCCATCAGCGTTCACCGGGGGCGCCCTGGCAGAGAGGTGGCAGCGGGCAATTCGTAGAGCCCAAGTGGCATCAGCCTCAAGGATGGCTG                   | 8 |
| wt-105540-105660 | 3731 | TGGCTCCGCGCGCCGACCACCGTCTGCTCCTCCCGCTCCCTCGCCGCTTCCCGCTGCAAACGTGGCGAGGGTTAATCTCCTTTCCGGTCCGGGGCCAGATTTGTTGTAGGA                    | 8 |
| wt-105660-105780 | 3732 | GCAGCGAGCCGCTGTTGCCCTGACCGCGCTGAGGCGCCAGGAGGGCTCTGCCAGGGCGTCCAGAGACTCCAGGTTCAAGTCCAGTAGCAGGAGACCCTCGCTGTGGCGCCC                    | 8 |
| wt-105780-105900 | 3733 | GGTGCAGAAAGCCCGCTCCCGCTCCACATAATGGATGGGCGAAGGAAAGCCCGGACATAGGGCTGGAATCTGAGCCCTGGGCGAGTTCGGGTCCAGGAGGTAGAAGA                        | 4 |
| wt-105900-106020 | 3734 | TGGGCTTGGTGCCTGTGTTGGGTAGCAGGAGGCATAGATACTCGGAGGAAGGCGTAGAGCCCGCCCGGCCATACTCCAAGAGTTGACAAGCCAGGACTCGAATCCCCAGCCG                   | 4 |
| wt-106020-106140 | 3735 | GCTCAAGAAATTTAGGCTGACGCGGTGCCCTGGGCGTCCCCACACGCGCGTGGCCCGTCCGACGACACCAGATCTACTTCATAAGTGACCGGTCCGAGGATGTCCCTAAAGGGGA                | 4 |
| wt-106140-106260 | 3736 | CGGGAGAGGGTCTGGGAGTCTCGGTGGAATAGGTGAAACATCCCACCGGTGCTCTGATGTATACGTCCAAGTGTCCGGGAGACTCAGAGTGCCTCTGAGCATGGGGCATGTCT                  | 4 |
| wt-106260-106380 | 3737 | GTTCCCTCCATCTCGGACCCGAAGCCATCAACAGTGGGGGTTGTTGGTCCCGCCATCATCCCCGAGCAGCTTTGGCAGACCACCTGTGCTGGAAGAGAGGCTGGAAGATGAGGC                 | 4 |
| wt-106380-106500 | 3738 | CCTGCTATCTCCACCTGGCGCGGACAGAGTCTCGGGTCTCGGGTCTAAATGAAAGGTCAAAATAGGTCCTTCTCGGGGCATCGCGGAGCATAGCAATGAGCCCCCGCTCGCC                   | 4 |
| wt-106500-106620 | 3739 | TGAGCTCCCGCTCCATCGCAAAAATTGAGTTCGGTAGTCGAGGGCGGTTGACCACGGGGGCTCAAGGAGCCTCAAAGCGCGGCTCGGAGCCTGCACCAGCATCAGAGTCTCAA                  | 4 |
| wt-106620-106740 | 3740 | CGTCTCCCTTTGATGGGCAGATGCCACAGCCAAATCGCCACCCAGCCCTGCGGTCTGGTAACATTATAAAAGGTAACCGAGCTGACCGGGCCCTGACGCTCTCCCGGGTG                     | 4 |
| wt-106740-106860 | 3741 | TTCCATCATTGTTGAGATCTGAGGAGGACTGGACCTTTAAACATCCGTCACGCCCTTTCGAAATTTTAAAGGTGAATGCTCAACTGAGACCATCGAATCATGAAGTCTCC                     | 4 |
| wt-106860-106980 | 3742 | AAGATGACAGCTTCTGCTATAGAAGCTGGGTCAAACGCTTGTGTGTACTTTGTGATTTGTATGTGCGCGGTGGTCCCATCACCAGGATGTTCCCAACCTGGGGTACCCTGC                    | 4 |
| wt-106980-107100 | 3743 | TACTTTAACGCACTGGTTGATTACGGGGCACTTAACTGACCAATTAACCTGGCCACCACCTGACCCCAAGCTCTATCTGGAGCCCGGAGATGTTGTCTACATCAGCTGGTCT                   | 4 |
| wt-107100-107220 | 3744 | TTATCGCGGACTCGTGGCTTTCATCTACTACGCTGCGGAGGTGGCGCTAATCAAGGCCGAAAGGCTCGGGTCTTACAGACTCTCGGCTGGTCTCGGCAGTGGGCTCC                        | 4 |
| wt-107220-107340 | 3745 | CCAACCGTGTGTTTTGGCCATCCAAAGCTTGGTCCATCAGGCTTTCATCCAGTCTTCTACAAGCAGCTCTTCTCTCGGCTTGTGACTTTTGCACCTTCTGCGCTCA                         | 4 |
| wt-107340-107460 | 3746 | GTTCTACAGCCTGCGCATGTGTGACCCGCTTCTCCCGGTCTGGTGGTCAAGGCCAGGACAACCTTATCCCAAGGACACCTTCTTGGTGGTGGTCTTCTACTGAGCCCGTA                     | 4 |
| wt-107460-107580 | 3747 | GTTACAAACCTGTACTGGGGTGCCTTGCCTGGAGAGCCTGGTCTTCTCGCTCAGCGTTCCTGGCCCTGGCAACAGCTTTTACTTTATGGTGGGGACATGGTCTGGGACCCGTG                  | 4 |

|                  |      |                                                                                                                                |   |
|------------------|------|--------------------------------------------------------------------------------------------------------------------------------|---|
| wt-107580-107700 | 3748 | AACCTCTTCTCATCTGCCCATTCTGGTACATTTCTGACGAGGTGTGGCTGGCCCTCTTCTGCGGCACAACCTTGGCTTCTACTGCGGATGTTTACATCGCTCCATCATCTGATC             | 4 |
| wt-107700-107820 | 3749 | CTGCCCTTGGTCAGGTACGAGGCCGCTTTTGTCTCCGCCAAGCTGCACACCACTGTGGCCATCAATGTGGCCATCATACCTATCTGTGCTCGGTGGCCATGCTCATCAGGATATGCCGG        | 4 |
| wt-107820-107940 | 3750 | ATTTTCAAAGCATGCGCCAGGGCACTGACTATGTCCCTGTCTCGGAGACGGTGAAGTGGAGCTAGAGTCAGAGCCGAGGCTAGGCCCTCGCGCACGCCATCACCCGGCGCAACCCG           | 4 |
| wt-107940-108060 | 3751 | CGCCGCTCTTACGTCTCATCTTCTCCAGGTCAACCAAGGAGACAGAGGCCCTCTCTACCCAAGCCCTCGTCTCCCTCGTTTTACCATGACGACGGACAGCGAGGAGGATCTTC              | 4 |
| wt-108060-108180 | 3752 | CCCTAATGCAATAAAAACTTAAACAACACTGAGGTTACTTTCCCGTCACTTTTCGGGAAACAGAGGGGAGCGGGGAATGGGTTAAGATAGGGCGAAGGGTGGGGTGGGTCAGAATT           | 4 |
| wt-108180-108300 | 3753 | GGGCTGGAAATGGAGGGGAGTGGCTAGTGGCCACCGGGTCCAAAGATAATGGATTGATGAAGCTAGGCTGATCGGTCGGCCGGTTCTCAGGGGTGTAGTGGGTGGG                     | 4 |
| wt-108300-108420 | 3754 | CATTGCATATTTTGGCCGGTCTGTTGGCCCTTGGCACCCCACTGTGGCGGATCATCGTACCAACATTTTAAAGGCTCCGGCACCCAGTCCACAGCCACCGCAAGTCTGGCCCTGCCACC        | 4 |
| wt-108420-108540 | 3755 | GTTATGCCTCCCCCTTACCATAATTACAAGAGATGTTAGTTGGTTTTTATTTGGCAAAAACAGCAATTCATCATTTTCAGAGTCTCATCATATTTCAGGCCCTCGTTGGTTTTCC            | 4 |
| wt-108540-108660 | 3756 | CGCAGGCCCTCCCTTCTCGGCCGCTATTAGCTTAGTAGTCTCCAGGTTAAACTCCTCATAGTCAATTATACAGGTTGATTATTCGCCCGTCCACGTCGCCATGGAGTTGACTCGTCGT         | 4 |
| wt-108660-108780 | 3757 | CGGCAAGAGACCAGAGGGCACCCATGGCCGGTGTCAAAGTATTGTCTGCTACGCTTTCAGGAGCCAGCCGGTGTCAAGTCTTACGGATGACAGAGTCCGGCAGGACCACGG                | 4 |
| wt-108780-108900 | 3758 | GTGTACCAGCACCACCAGGGAATCCACCAGGCGTCCAGAAGCAGTCTGAGCCAGCTGCAGTCCGGTCTAGAGGCGACCGTTTTCAAGAAAGGCCGTCAACATGTTCA                    | 4 |
| wt-108900-109020 | 3759 | CCCGGGTGAGCAGTCTCTCCGGGCTTGGCACCCCACTGTGGCGGACTGATCAACATTTTAAAGGCTCCGGCACCCAGTCCAGGTTGTTGAGGAGCACCCTGGTGAAGTATTGTGGGATGGGAGCTG | 4 |
| wt-109020-109140 | 3760 | TGACTGGGACCCGCTTTAATACCAATGCGCCCGCATTTCGCTGGGTCCGTCATTACGTAGAGCATAGACTCCACCCCTGTTGGCAGCTAGGCTGTCTGCCACCAGGTCATGAC              | 4 |
| wt-109140-109260 | 3761 | CGGGGCCAGTTTGGCTTACGGACATCTTAAAGTCCAGGCCCTCATCTGCTCAACAGATAGTACCCTCCGAGGGCAACCGCCATCCGGGACGTACTCCACGGTAGGACGAGCTA              | 4 |
| wt-109260-109380 | 3762 | TAGAAATTGATAAATCTGATAAATGACCTTTCGATGGCTCTTGTAAAGCCAGTGTAGGATGGGTAGATGGGTCAAATCTGACTTGGAAAAGAGGTAAGGCGGCATTAATCT                | 4 |
| wt-109380-109500 | 3763 | CATAAATGCAGTCCGGTCCGTTGAACAGTATAAAGTCTCCCTGTGACTCCACATTGACGCAAGATCCAGAGACACCCCAAAATGCCATCCGTGGGACTAATCATAAAGCCAAATTGAC         | 4 |
| wt-109500-109620 | 3764 | GGTGGCGGATGCGTCCCGCAGATGAGCTTACAGACAATGCTTACCCTGTCTCACCCGAGGCCAAAGGCCACAGGTCGCCCAAGTAGTGAITTTGGAGATGGGAGCTGGCT                 | 4 |
| wt-109620-109740 | 3765 | CAAACACCTTGGTGGTCCATTCTAATGGTGGAGAGCAGCTTGAAGAGGAAATATGCCATTCGCAATATGTCCACATCAGGTTCTCAGACTGCCCCCTGGTCACTGACTCCACGT             | 4 |
| wt-109740-109860 | 3766 | ACGAGCAGAGAACAGTCTCTGCTCGTGGTGGCCCTCTGTAGCCCCAGTAAATGGATTTCAGGGAGGGACCGTCTTGTCTCATTCTTGGACTAACGAGGAGACAAAGTACACAGA             | 4 |
| wt-109860-109980 | 3767 | AGCCAGTTTACCAGAGAACTCTTGTATTTGTTTACAGAGCAATAGAGATAGACAAAGCCGATGGCCGGCATCTGAGGTGGACGGTCAAGGTTACGGACAAAGGCCCTCAGTCTCCGGAC        | 4 |
| wt-109980-110100 | 3768 | TGCGGAGGAAGCGGGCAAACGTGAGGAGGTCATCTCCTCCATGGGATCCTCCGAGCTTACCCAGCTGGCCATCTGGACAAAAGAGTCGTCTGCCAAGAGTTCAGCTACCAGACCTGGA         | 4 |
| wt-110100-110220 | 3769 | AGATGAGGGTGTCAAACCGTGGCCAGAGTTGAAGAAAGTGGCTCCTTCAACCTCTTAAAGGCTCCGGCACCCAGTCAAGAAATGACTCATATGCTCCGCCGTGACATCCACGCAC            | 4 |
| wt-110220-110340 | 3770 | GGACTCTCGCCACACGAGGTGAGGCCATGTCTAAGTTCAGTTCACATCTGCGACAGCACCTCCAACGACACCCTTTGGGCTGCAAATGCAAAAAGTAGAGCGGGTGGATCGG               | 4 |
| wt-110340-110460 | 3771 | TCAAATCCCATGTCAGGTTGGGTAGGGATTTTGTGGTGGAGTACGAGGTCATGATACCATAGAGCAGCGAGTACCGAGCGACTGCAGATCCAGGCCAAGGGCCGTCTGCGCC               | 4 |
| wt-110460-110580 | 3772 | CCCACGGGGCCACACGCCGAGGGTCAAGGATGTGCCAGCCCCCTCAAGATGTAGCACTTGTCAAAGGCGAGAGGGGTTATAGGTGTCTTGGCTATAGAAAATGGTCCCTCTGG              | 4 |
| wt-110580-110700 | 3773 | CAATAGAGGCGATAGAGTCCCGGCCCTTAGAAGACTTAGCCGCACATCCAGCATCTTGTTCGGCTGTGGAGGGAAGCAGTCCCAATCAGTCAGGACCAGCCTACCATGCCCCAC             | 4 |
| wt-110700-110820 | 3774 | ATGGTGTGTGAAATCCACAGGATGTTGCTGGGCTAATGTCCGAATGGAAGAGCCGAGTCCGATTCAGAAAAGTAAACGGCATCTTTGAGGCCCTGAAAGCCCGCCAGCAGGGG              | 4 |
| wt-110820-110940 | 3775 | TCAATACTACCATCATGCCAGTGCAGTGGAGCTGATAGGTAAGAAATAGCTGTTTGGACTCAAACGTCCTCCTTGCCTGGCGCAGGGACTCTAAGGCACCCGAGCAGATGT                | 4 |
| wt-110940-111060 | 3776 | TCCTCGCCGTGGCTTCCCAATCTGAATCATGTACACACCATGAGCTCGTATACAGTCCGTCACAGAGTCATAGAGTTTACCGTGGCATTATCTGCATGTGCATACACGGCCCG              | 4 |
| wt-111060-111180 | 3777 | TAGCTCCCGCCCGCCAGCAGATACTCGCAGTAATGGGAGGTGATCACAGCCGCTCATGTTCTCCGGCAGCTTACATAGAGGGTCTCCGTGATGCATCAATGTTGGTCACTTACAGG           | 4 |
| wt-111180-111300 | 3778 | TGTTTGTGCTGAAAGGTGAAGTAAATCAATGACAGTCACTTCCCAAAAAGGCCCTGGTCTCTCGAGGGGTTCTGGGGAGACACTCAACTCGCCACTGTGGAGGATTCGTCGGGCTC           | 4 |
| wt-111300-111420 | 3779 | AACTCCGACGCATATTCACATCCATGTTCTCAAATGGCTCGAGGGCTGTGCGAGCTCGTCTGCGCTCAAGCTCTGCTCACGGAGCTCCACCCGCTTAGCTGCTTGTAGTT                 | 4 |
| wt-111420-111540 | 3780 | GATTTTGGAAATGAGTCTTGGTCCGGTGAACACCCCTGATAGGTAGAAATAGCTGTTTGGACTCAAACGTCCTCCTTGCCTGGCGCAGGGACTCTAAGGCACCCGAGCAGATGT             | 4 |
| wt-111540-111660 | 3781 | AAACTGTGTTCAAACAGAGCGTGGTCCCTCCCAAACTGTGACGCTGCGCTCACAGCCGCTCTCTTTTACCGAGGCTCTTAGTTGCTGGGCCACAGATCTCGCTTAGAACTACTCAT           | 4 |
| wt-111660-111780 | 3782 | CTTCAATAGTCACCATGTCCGCAACTATGGAGCCAGATCATAGTGGGTAGAGTACGGTAGTTCAGTGGAGGCTCCCGGTAATTTCCACAGGGTCCACCATATATCTTTCTGCT              | 4 |
| wt-111780-111900 | 3783 | CTCCCGTTAGAATAGGCAAGGATCATAGTGTCCACCGGCCCTTTAATGAGCGTTTGGTTTTGTTATGAGCAAGCACAAAAGGCACACAGAGTATGCAAAAGGGTTCCTGAG                | 4 |
| wt-111900-112020 | 3784 | GCAGCAGGACAGCTGTTTGCATTTTATTCAGCGGCTAACGTCAAAGGGAGGAGTATATCTCACCTTCCAGTCAAGGACAGTCCAAAGTACAGGGCATAACACACCTGGTGAAGT             | 4 |
| wt-112020-112140 | 3785 | GTGCCAGGAATGCCTCTATGTTGGCACATGGTGTATAAAACCCGAGTGGGTAGCAGAATAGGGCCCTTTTGGCCGTCGCCGAGGCAAAACGCAGTGAAGCTCTTCGAGTGGGACCTGG         | 4 |
| wt-112140-112260 | 3786 | GGCCGTAGAAGAGGGCCACATCCAAGGGAGTGGTCTTCAGGCACAGGGAGGTCAGGTTGGGAGTGGGCAATATTTGCAAGGCCCTGACCTATAACCTCATCTTTGTTCCAGGCCA            | 4 |
| wt-112260-112380 | 3787 | GGCAATTCGCATAAGTCCCATCAAACACTCAAACACAGACCCATGCCATTTTCAGGCTGAGAGGGTCCATCCGGCTCGACCAACCTTGTCCACAACTGCCATTCTCTGGTA                | 4 |
| wt-112380-112500 | 3788 | AACGGGGTGTAGGGGCAAGAGCTCCAAAGCCAGGCTCGAGAACTCATAGTCACTCCGGCCACAGCCGGAGCTCCGGGCTCGTCCAGGGCTGTTGTCCTGGGGAGGATATTGG               | 4 |
| wt-112500-112620 | 3789 | ACACGAGCAGGAAGCTCTTGTAGTGGCTCTCCACAGCTTAAATGCTCGGGCTGCTCCGAGGCTCCAGTCCAGTCCAGACTGCCATACCTGCGGGCAGCATCGGGTCACT                  | 4 |
| wt-112620-112740 | 3790 | CGGGCATATCGGCTTGGCCGTTGACCGGTTGACAGTGTATGCTCCGAGCCGCGGCTGTGACCCAGAACCTAAGAAACGCCCTTACGACGAGACAGCACCAGCAAGGCTGCCCTGGGTGCCG      | 4 |
| wt-112740-112860 | 3791 | AGACCCGAGTATTATGTACACAGGGCCAAGTCAAGAGGTTGGCTCACCCCTGTTGGTGGGCAAAATTCAGCCAGTAATTTATATTGCCAATGCTTCGAGCATACTGCCCACTATG            | 4 |
| wt-112860-112980 | 3792 | GCCCCAGGCCGTTGTTGAGCTTCTGATGAATCATTACCATGTTCCGGTGGAGCCCTGCCCTCACACCCAGTCCAGTCCAGATGTCCCTACTACCAGAGCTACGCGACAGCTTAC             | 4 |
| wt-112980-113100 | 3793 | AGCGCTGCTGCCACCACCAATCTTGAAGACTCCGAGGCCCTGACGGAATTAAGACCAGCGTGTCTCTGCCCGTCCATCCTTAGGAGCCCCAATTTTTGGAGATGAGAGATTTG              | 4 |
| wt-113100-113220 | 3794 | TCACCAGCCTGGCCAGCTTCTGAGTGGTCAAGCAAGCAAGCCCGCCGCTAGAAGCATTCAGAAACAAGTAGTGTACATCTTTTATTTTCTGATCTCAATCAAATCTTTAG                 | 4 |
| wt-113220-113340 | 3795 | AGATTACAGACCATGTTGACATGTTCAAAGTGTCTTCCGATTTGGAAGAAATGACGCTGGAGAAGCTGCACATTTTAAAGCAAAAAGCCAGCGTGTCTTATCCCGAGCCGACG              | 4 |
| wt-113340-113460 | 3796 | GCAAGACCTGGATAGTCTGGCCATTCACAGCTCATCTCCAACTCCCAATGCTGCAAAATAGGCTACGTTGGCTCACAGAAACATGTCCGCTCCCGCTTTTCACTGAAATTTATG             | 4 |
| wt-113460-113580 | 3797 | ACACCTTGACCAAGAGCTTGCAGTCCAAGCGTGTAGAGGTCAACAAGGAGACCAGCACCATCAGTGTAGGCACAGTGGGAAAATCTCCAGCACCGTAATGTGTCCACCTGCTTCAATA         | 4 |
| wt-113580-113700 | 3798 | AGAATGTAAGACCTGACGTTTTCAGTACTTGGCAATTTAGAGCATAGCCCGGCTGTAAGGTCAGAAAATCGCAGCAGGGTCAAGGTTGTGCTGTACATGGGACCTTTTCCATTAGC           | 4 |

|                  |      |                                                                                                                                |   |
|------------------|------|--------------------------------------------------------------------------------------------------------------------------------|---|
| wt-113700-113820 | 3799 | AAGAACCCTGCAGGACAGTGCATGTCCGGTGCATTTTGGTGGGTTAAATCTCAGTCCCACCACAAGGGGGCATCTCCGGTTTGAACATCAGACCAACAAGCCCGATGCC                  | 4 |
| wt-113820-113940 | 3800 | AGTTATGGGTACGTAGTCGTTGTTACAGGGCGTGCATGGCAGCAGACAAGGACAGTGCAGATGTCCTGGCTATCGTCCCTCCGTCAGCCACGAGGATGTTACAGTGGGCCCGGC             | 4 |
| wt-113940-114060 | 3801 | ACCATAGCATGTCACACATTCGCCGTTATACATCTGGTGTAGCAGGTTGATAAAATGGGTGAGTGTGAAAGGTTGGCATATTGGGCAGCACATCAGCATGTCCATGTTAACGAAAA           | 4 |
| wt-114060-114180 | 3802 | CATGTACAGGGCCCTTCTGCATACCAGGCACCACCCTGCCAGTGGGATGATCTCCGAGGGTGTGATATCTGCAGTTCTTACTGTTTTAACGGCCGGTGTAGGTGGTAAAGACGTG            | 4 |
| wt-114180-114300 | 3803 | GGCCGTGGTCAGATCTGTGCAGGTGACTACAGGGTTACCCTAATCTCCACAGGACCCTCAGCCATGCATCTGAGAATACCCAAAGTACATGAGAGTCAAGGCTGTGTGGCCCTG             | 4 |
| wt-114300-114420 | 3804 | GACTGCCTTAGTGAAGAACTCGCCGCTGCCACGGTGGCTAGGTTCCATTTGATGTAGCCGTCACATAGGTTGGCTTCTTTGGCTCAGCACAATGAGGGTAACTCATGTA                  | 4 |
| wt-114420-114540 | 3805 | GGTTTTAGGAGGTCGGCTACTCTAGGACCTGACACAGCTGTGACACGGCCGTTGGCCGTTAGACTTTCTCTGGGGCGTAGAGGCATCGCTCAGCAATGCCCTGACCAGGGCCAGGCACTCTTTGAG | 4 |
| wt-114540-114660 | 3806 | GAACTTGCAGAGCTTCCCGGCTACTGTTCCGCGGGATGCCATGACGTGCCAGAAATATCCCTCTCCTCGGGGGTGTAGTGCCTTTAATAACAAGCCCCAGGCAGCA                     | 4 |
| wt-114780-114900 | 3808 | TACCCAGGCCAGGCCCTTCTCATACAGCGGGTGGCTATCTATCCATAGGCAGGCATCCGGCGCTCTTTGGTGCATTGGAGATAGTAGCTTTACCCCAACAACCTTCCCAACTAACCC          | 4 |
| wt-114900-115020 | 3809 | GTGTCGGACAGTGAAGAAGCTTCCCTGATCAGGTCTGAATTTTTATAGTACGGGAGTAGGAGGTGGGAATAACAAGTGGGATTTCTTTGTTGTGCTGCCAGCCCTGCATGGCCAGTT          | 4 |
| wt-115020-115140 | 3810 | TTCCCTGAAGCTAGCAGAAATCTGAGGGCCATGAAATGAGGAAGCGAACTCCCTCTCTGGAGCTCCAAAATTTGAACCTCAGCAAGATCTGTTGTCTGGGAGGCATGGGTGACAG            | 4 |
| wt-115140-115260 | 3811 | AATAAATCTGAGCTCCCAACAGCCCTCTTCATCGTAAATCGAAGGGCGGCCACGTGGAAGGGTGTGAGACTCTGGAAGGCCCTCATCGCAGTACACTGGCACACTGGTAAACG              | 4 |
| wt-115260-115380 | 3812 | GACGGTCTTAGAGAAAGAACAGGCACCCTCGAGAGTGCCTCCGACCCGACCCACAGTGCCTCCAGTCCCTGCTGGCCCTCCGCGCTTCCCAAGGGCGTGCCTCCGGATGTTGC              | 8 |
| wt-115380-115500 | 3813 | TGGGGTTCTCGAGGGCTGGTGGTCTTGACACAGAGGTTCTAGCAGCGCCTGGTCTGGCCCGGCCCTAAGTCTGAGCCCGAGCAAGGGCCGGACTCCAGCGTGGCCAAAC                  | 8 |
| wt-115500-115620 | 3814 | TCTGCTCCCTCTATTCTCCTTGTGCTTATCTCAATAGAAATTTGCTTGTGAGTACATCGTTTAGGGTGTGACCTGGCCCGGCCACCGGCATATGCTTATACCCGCCCTCCGG               | 4 |
| wt-115620-115740 | 3815 | GGGGCCAGGATCTATAGGTATGGGCTGCATAGCCGACGACTCCTGGACCCAGAGCCCTCTCTGATAAGATGCCCTGGTGTGAGAGCCCTTTGGCCCTCAAAGAGAGACAGT                | 4 |
| wt-115740-115860 | 3816 | AATAAATCTGAGCTCCCAACAGCCCTCTTCATCGTAAATCGAAGGGCGGCCACGTGGAAGGGTGTGAGACTCTGGAAGGCCCTCATCGCAGTACACTGGCACACTGGTAAACG              | 4 |
| wt-115860-115980 | 3817 | TGCCCGATGGTAGGCTCCGGGCAGCATGCCCGAGCAGCAACACGCGGCAGACCCCTGAGACCCGTCGGTCACTGAAGAGAGTGTGCACCAGGCCCTCGCAGTTTGGCA                   | 8 |
| wt-115980-116100 | 3818 | CGCGATTGGGCAAGGCTCTGCATAACCGTGTCCGGAAACAATAGTGCACGAGGAGGGGGTCCCGAGGCCACTCAACACTTGGTTGTAATGTGGACATCCATAGCTCTCTCATGCG            | 4 |
| wt-116100-116220 | 3819 | TTGGCTACAGCATCATAGCGCTTTTCTGTTGATTTAAATAACAGGGCCCGGTAGACAGTCTTTTGTGAGTAAATAGAGATGATGACATGGATGTAGAGACTGAGGACCACATCCAC           | 4 |
| wt-116220-116340 | 3820 | CACCTTCTCGGAGGAGGCCCTTAACAGCATCAGGCAGCAAGGGAACAACAAGGAAACCAGGGCCGGGATGTGAGGCCCTCAGCGCCCTCTCTGATCAAAGAGGGCTCGCTGACCC            | 4 |
| wt-116340-116460 | 3821 | GGAGATGACATTTCTATTACAGAAAGTAGTGTAGAGGTTGACACAGTCTTAAACCAGGCCCTGGACTTGTTCAGGCTCCCATTTGCTCCGCTGGTGTGTCTTGTGCTGATCTC              | 4 |
| wt-116460-116580 | 3822 | GGTCCAGGCCCTCAGCGCCGGCTGAAATCGCGCCCATGTAGTTGCTGTAAGGGCGCACACCACTCCCTCATGGTCTCAATCAGGGTGCCTCGTGGATCCATCACATACGTGGTA             | 4 |
| wt-116580-116700 | 3823 | CTCGCCACAGCCAGCAGGCAACACGGAGCCATGCTCTCAGGTAAACGGAGATGGAACCTCAGCTTACTATACGAGCACAGGTGGCAGGATTGGGCTCATCGTCCCGCTCC                 | 4 |
| wt-116700-116820 | 3824 | CCGCGGAGGCTCAATCGGCCCTTGTCTGACATCCACCCCGGCCAGGTCCAGGAGGGTGCATAATTTCTCCAGCGCTGCACCTCAGAGACCTCTGCTCAAAGAGACCTCCACC               | 4 |
| wt-116820-116940 | 3825 | ACGTAGACCGGGCCACCCTCCGGGAAGGTCAAGTGGGGTCCAGCTCAGCAATTTCTCAAATTTCTCTCCCAATAGTGCCTCGCTTCTATCTGTCTTTCAGAGCATCCGGGGCA              | 4 |
| wt-116940-117060 | 3826 | GACATTTCACTCTTGTGTTGTGGACGAGGTAACCTTTATCAAGAAAGGGCCCTGCCGGCATCTGGGCTTTATGCTTCAGAAAGATGCCAAGATTTCTCATCTGCTGTGAAGCT              | 4 |
| wt-117060-117180 | 3827 | GGCTGACAGGCCACCAGCTTTCTTATAAGCTGAAGGATGCTCAGGAGCGCTGCTCAACCTGGAAGTTATGTGTCTCAGGAGCATCGGCAAGATTTGACATGCAAGGACAGCATGGT           | 4 |
| wt-117180-117300 | 3828 | CTCATGCCCTGCTTTGCTGTCACATCCGCTCTACATCACCATGGACAGCAACATCCGAGCAACCACCACTCTTTCTGACGGGGCTTTAGCACCAGCTGATGGGTGACACCTC               | 4 |
| wt-117420-117540 | 3830 | CGTGTACGTTGATCCGGCTATACCAACAACACATCCGCATCAGGCACCGGAATCGCCCGGTGACTCAGCACAGGGCGGACCCTAACAGGGTTCATGCTCTGGCCGGCAACTTCTT            | 4 |
| wt-117660-117780 | 3832 | CAGCAGTCAAGGACTGCGGGTGGCCATTGCCTCAATCATTGGGGAATCCTGCCCTCCCTGCGCTTCTGTGCACCAAGGACAAGACGTCACGCTGCAGTGGCCATGTACCTCT               | 4 |
| wt-117780-117900 | 3833 | GACTAATGAGAAGTCAAAGGCTTTGAGAGGCTCATCTACGAGTGAACAGGCCAGCCTTTCTGCCAGTCAAGTCAAGTCAAGTCAAGTCAAGTCAAGTCAAGTCAAGTCAAGTCAAG           | 4 |
| wt-117900-118020 | 3834 | TCTCATCTCCAGATCAGGGCCATCAAGCCATCCCTCTCCGCGCAGGTACCTACACCTACACCCGCAAGCAGCCCACTCTCTGACGACGTCGCTGGTGGCTAGTCAATGGCTATT             | 4 |
| wt-118020-118140 | 3835 | TCTCGCAACAACAGAACACAGCTTCAAGAAAGTTCATTAACCTTTATTGACTACACCAGTCCCTGTAAAGCGACGGGTCTCGCTGACGGCATTCTGTAGCAGGGCTTCTGCCAGG            | 4 |
| wt-118140-118260 | 3836 | GGCTTGTCTTGGCGGACATATTAGCCAGCCGAAATATCAGAATTAGCATCAGAAAAGTAGGCCCCACAACACCAAGTGTCCAGAGAGGAAGCCGTAAGATAAAGATGGCTGCC              | 4 |
| wt-118260-118380 | 3837 | TCATCTGGAACGGTGGGAAGCTCAGCAGTTGTTTTGTGGCATTGGACGTCCTTTGGAGGACAGCGTGGGGCCAAAGTGGTAGCGTTGTAATACGGGTAGTACACTGGTGGTAG              | 4 |
| wt-118380-118500 | 3838 | GAGGACCTGGTGGTACATTGCTAGTACACCCGTTGAGGTTCTCTCCGGCTCGGTGGCAGTGTCTGTGACGTAACCTTAGTGGTACATTTGATGGTGGATGGCTTGGAAAGTT               | 4 |
| wt-118500-118620 | 3839 | GTTGGGACTGGTGTGACAGTTGTCCCAAGTGAATGTACCCGTTGTTGTTGGTGTCTCAGAATAGCAGTTGGTTATAGGGGGCGCTAGTCTGGTCAAGGTCGAGACTGGTTGTGCTA           | 4 |
| wt-118620-118740 | 3840 | GGACCCGATGCCAGCGGTGATGGTGTAGTACAGCCGTTGTGCTGTACGTTCCCGCCGAGGGCTCGAAGTCCCACTAGATGTCCAATAAAGCTTGTCTCACAGATGAGTATCATG             | 4 |
| wt-118740-118860 | 3841 | GCCATAACAGCGCTGCCCTGTCTGCGGTGTGCCATCGCTGTGGACGAGAAAGGCTCCCGGCTCTTTATAGTGTCTCCACACCAATCTACTGAACATCACATACATG                     | 4 |
| wt-118860-118980 | 3842 | ACCTCTCGAGGTATGAGGGAATGAGCGGTCGCTGAGCGGTTCAACACGACATGCTTCCGTTTCATGCTCAGCTGCCCTGACCAAGTAGGACCTTGAACGGATGCTTTAACGGC              | 4 |
| wt-118980-119100 | 3843 | GCGGTGACGTTGGTCAACCAATGACGGCTAAAGGCCAACACATCCTTGAAGCAGGGCGTAGGAATGGTACCAAACTCGGGGCCACCCCATCAAGACATAATATGCTCATAGTGGCAG          | 4 |
| wt-119100-119220 | 3844 | TGATGATGCATCACACACAGACTCGCCAGGACCTCTGCATATCTGTACAAGGCGCCCTTCAACTCGGCCATGGCTCTGGTACGTTAAATGCTCTTCTTATGATGCTGACGCT               | 4 |
| wt-119220-119340 | 3845 | TGTAGATTTGGGCACCCAGACTCAAAAAGTGCAGCTACATGAAGGGGACCGCCCTCAAATCCACCATGACCCCATGGCTGCTCCGTTGTTGGGGTAAATGACATGTTAATGACC             | 4 |
| wt-119340-119460 | 3846 | ACGGCCGGATAAGGGTGTAAACCTTGCAGAATGGATTGGTGGACACCCATAAGACAGGGGCCACCCAAAATCAGCCCTTACCCGAGCACCTTGGCCCCACCGGCATAAAGCTG              | 4 |
| wt-119460-119580 | 3847 | GGCAAAAAGAGTGGTTAAAACCAAGGCGAGTAGGGCCAGGAACGCCAAAATAGCAGCAGTAATAGATGAAAACAAGCTCAGCATGAAACAGCGTGGAGGCTCAGCTAGGGTCTCTGCC         | 4 |
| wt-119580-119700 | 3848 | TCTCCATCAGACATCTTCTTGAATCTCATTCTCTCACCCGATACCTCGCTCTCAGCATCCAGGAGGGGGCTGAGCTGCCATTCTACCAGTTAACGAGGAGAGAGGATGTCGGC              | 4 |
| wt-119700-119820 | 3849 | GAAATGTGCCCCCTCTGCCCTCTGACGAGGCGATGGTGTCACTCATCTCCGAGTCCGTTCTTCCAGTGGTGGATTTGGCATTTGGTCCGGTCCGGTGGTGAATTTGATTTGATCTGATCTGG     | 4 |
| wt-119820-119940 | 3850 | GTAATGGTCTTGGTCTCTCCCTCCCAATTTGGCATGGATTGGCATAGGTGGTGGTGGTGGTGGTGGTGGTGGTGGTGGTGGTGGTGGTGGTGGTGGTGGTGGTGGTGGTGGTGGTGG          | 4 |
| wt-119940-120060 | 3851 | GAGGCCCTCCCTCCGAGGTCGTGGGGCCGAGCCTTATAAAAGACTTCCACCTCTCCCGCTGGCCAAGACACCGCTGTGACACCGCATCTTCTCCCGCTGATTGTGTGG                   | 8 |
| wt-120060-120180 | 3852 | CTGACGGTGGCTGTCCACCGCCACTTGTTCATCGACCATGGTACCCTTTATCTTAAACAGCAAGTGGCCGTACAGGCTCTTGTAGAGTATGCCGCTGTGGCCAAGCGAGGCCCAA            | 4 |

|                  |      |                                                                                                                          |   |
|------------------|------|--------------------------------------------------------------------------------------------------------------------------|---|
| wt-120180-120300 | 3853 | ATTAATAGTATGATGCCAAAGACTGTAGGTAGGTCATCATCACACGCATCGGTGATAAATCATCCGCCACTGACAGGTCATCCAGGTCATCCGGGCTATCTCATCCGGCACCATTTCCTG | 4 |
| wt-120300-120420 | 3854 | GAAGAGATTCAAGAGGTCGTATGCTCATGCCGGATAAGGCCTCGACCAGGCGCATACTGCCCTGGCAGCAGGGTCACCATGATGCAAAAGTAGAGACTCAGATTGTCCAGCAGGGC     | 4 |
| wt-120420-120540 | 3855 | CAAGCCAAGGGGCCCTGGCACCTCCGGGAGGGCCAACCTCGTAGTGGTCCCCAGGTATGAAACAGAGCCAAGATGCATGTGTACATCGAGCATGTCTGGTCCCGGAGCCTGCATGAC    | 4 |
| wt-120540-120660 | 3856 | AACCCGGGAGTACACGTTAAACAGGAGAATCTTCTGCAGCACCTCCTCTGCTATGGCGTAGGCAGCACCATTGGGAAAACAATGCCACATCATGGACTCTAACTTACGGTGGCATG     | 4 |
| wt-120660-120780 | 3857 | CTCTCGTCCAATACCGGGGGCAACACTGAGGCTCCCGTCCCATGCCACTGGAAAAGGGCTGGTATGTTCTTAATGGCGTAGGTCGACCTGGAACAATCTTGGTGAGATCAAA         | 4 |
| wt-120780-120900 | 3858 | ACTGTCCACGCTAACCTCATCCAGCAGCGCCAGGTGCAATCAGACAGTAGTTGTACATGGACAGTCTAGCCGGACCGTCTTAGAGAGTACACCTGACCCAAGCCCAATCCCTGCAC     | 4 |
| wt-120900-121020 | 3859 | ATTCTGCGTCCCGTAGTGGAGGAGGTAAGTAGCAGCAATCTCTGTTGATCTTGCATCTGCGAATCTCATCGGTGGAGAGTTGAAATAAGCCACTACCACTTTCAAATCCATCTT       | 4 |
| wt-121020-121140 | 3860 | TATTGACAATTATCAAAAACCACCTTATTTCCAAACTTTAATTTCTTCGTACCGGCCACCTCTTCAATTATATAGTGTCCGTAATGGATGGGGCGTGGGTCTGTTTGACAGACAT      | 4 |
| wt-121140-121260 | 3861 | AAACTCATCGATGAGTGCCTGGGAGGAGGCTGAGAGTGCCTGGGAATGCCTCCTGCAGAAAGCTCGAGGGCTGCTCCAGAAAACAGTCACTGCCAGCAATCACTACAACTGCACCTCTGT | 4 |
| wt-121260-121380 | 3862 | GTTGCTGGTGGCTGGTGCCTCCAAGTCGCTGGCTGTACTCGTTGACCATGTTGTAGAGTCCCTGTTGTTGCCGAGAAGCTCCCTCTTGTGAAAATGCCCGCAGGGGCTGTAGAG       | 4 |
| wt-121380-121500 | 3863 | GCCCGGACGCGCTGCGCATAGGAGGAGTTGATCATGATGTCACCCAGAGAACCAGTGCATGATGCCAGGGATTACAGTGTCTCCGATTCATAGCCGGCATCCGGGCGAGAATG        | 4 |
| wt-121500-121620 | 3864 | GTCATAGATGAGCCCTCGGCAACCTCTGATTGTAGTATTTTCCAGAGGACCCACACAGCTGGCCCTGCCCTGGAGAGTTGGAGTTTGGAAATAAGCCACTGCTCCCGTACCCGTTG     | 4 |
| wt-121620-121740 | 3865 | TACGATAATCTCACAGGTGGCTGCTGGCCGTGGCAGAGTCTGGAGCTCCATTAACTAGTCATACCTGCCAGTATGCTCTGGGGTCCGAAAGCAGCGTCCCATTGCGCTGAGCGCC      | 4 |
| wt-121740-121860 | 3866 | CACCTTGGCCTTGTATGATGACTTGTCTGGTTGCCAAAGGCCTCGGCCGAAAGACGCTAAAGAAGTCTTGGGTGGGATACCATGTCAGTAGTGTAGTGGCCGACCCCTGGCCGG       | 4 |
| wt-121860-121980 | 3867 | AGTCATGGTCGAGCTATAACTAAGCCCGGTGTCATGGAGGCCATCTCGTATGCACCTCAAAGGTTACCGCTCCACCCTGGCCTCCCGGCGGCTAACTTGGGGTCCCAATGAAAT       | 4 |
| wt-121980-122100 | 3868 | GGATGTTGAGGCCCTGGAGCTAAACAATATGTTTTAGAGAGGATCTCATCGTCTGACCACGGTGCATGGCCACCCTGGTGGATCTTGGCTGGCCTGGGCAATATAGCCATGGG        | 4 |
| wt-122100-122220 | 3869 | GGACATCTTGATGTCATGGCGGTATTCCACTGATTGAAACAGGGAAGGAAGACATTCGCGCCGCTATTTGCCATGGGCGAGCGGTGCCACTCCCGTACTCGCAAGAGCTGCTC        | 4 |
| wt-122220-122340 | 3870 | TGGCCGGTGAAGGCTCCACGGCCCGCTGCTGAGGATTGCGCATAACAAAGTGGCAACATCTGGTGCATGGTGGCAGCCACTCGCGGGTCCCGTAAAACATATGAAAGGAATGGC       | 4 |
| wt-122340-122460 | 3871 | GTGAAAGAGACTGGGTGACGGCCGGTCTCTCGGAGAAGGCAAGGCCACCAGCCGTTCAACAAAACAGTCTGCTCTGTCCGCTTGTGCGCGGATTGGGGCCAGCTGCTGCGT          | 4 |
| wt-122460-122580 | 3872 | AACGTCATTGTCCACCAGACACCCAGCCAGCGGTGAAAGTGGGCGAGTGCATGAATGAGGCGCTGAGTCCCTGATCATGCCACCGTGGGGCGGAGGTCGGAGATCCAGCAGATC       | 4 |
| wt-122580-122700 | 3873 | CCTGAGCGTCCCAATTTCCAAATGTCGAGGATGCTCCTGCTCCCTGGTAAATGGTGGCTGAAGGCTGGCCCGTGTAGGCCAGGGTCTGGGCCAGTGTGAAAGTCCACCCCGAGGCC     | 4 |
| wt-122700-122820 | 3874 | GGACATCTTGATGTCATGGCGGTATTCCACTGATTGAAACAGGGAAGGAAGACATTCGCGCCGCTATTTGCCATGGGCGAGCGGTGCCACTCCCGTACTCGCAAGAGCTGCTC        | 4 |
| wt-122820-122940 | 3875 | TCCGTTAACCCGGTAGCCGTACAAGGCCACAAATTTGGCAGCCATCTCATCCATGTTTCAACCCCTCAATAAACTGGGCGCGGCCAGGGTGTACAGCTAAACCTCATTTCGATAAT     | 4 |
| wt-122940-123060 | 3876 | AATCTGGGGGCCCGTCACTAACGGTGAAGAATGGTGAATAATGCTGTGATAGGCCACCGGGGGAGCAGGTTAGGGTCCAGGAGAGCCAGACATACTGACCCAGCTCTCATCCCC       | 4 |
| wt-123060-123180 | 3877 | CACAACATCTGACCCGGCCAGCGCATCAGGGCTGCTCTAGGGCTATAAGTTCCCATAGATTTTTCTATACATGGAATAGGCCCTCCTTGGAGATGGCGTTATTTCCAGGTGGCGGCA    | 4 |
| wt-123180-123300 | 3878 | GATGAACCTGATCATGGAAGGCTGTTCAAAAGGCAAGCCCTCCCTGACCGTCCAGTAGGTTGATGCACAGGGACACCAAGGCACGTTGATGACAAACTTTTCTCAAAACCCGTG       | 4 |
| wt-123300-123420 | 3879 | GATCATAGCCTCGACTACGTAGAAGAAGGCTGGATAGGCAGTGTATAGGCAGTATCTGCAGACTCAATAACGGCCTGATCCACCAGTGGGCCAGAGATGGCGGTCTCAAATG         | 4 |
| wt-123420-123540 | 3881 | ATAAAGGGGTGACGCTCCAGCCGACAGAGGTATAAATTTGACGGGTGGAGGAAGTCTTCCGTTGGGAGCCGCTGATCGGTGGGAGCTTGAAGCTATATCTGTCACGGGGGCTGCATACTT | 4 |
| wt-123540-123660 | 3882 | GAACCTGTCACAATAACAAGCACATTCATGTGATTGGGCCCTCTGTTGCGAGGAGTAGGTCCTCGCCCTGTCTCGGGGGCCGGGGCCGCTTGGGCTGTTAGGGTATGGGCGGG        | 4 |
| wt-123660-123780 | 3883 | TGTGTGGAGTCGGGGGTGACAGAGAACCCTTGAGAGCATTCTGTAGGTTAAACGCGAGGAGAAGTTATCTTGTGTTACGATCCATGCTCCACCCTGAGTGTGTGGGGTGTCCAG       | 4 |
| wt-123780-123900 | 3884 | CATTTGATGGCGCGGAGGTCGTACTTGGGATTGGGCATAAACAGGCCACTGGGAAATAGTAGCTGTACTGCATTCTTCTGTTGAGGGGGTATGGGGACTGAGTGCATTGTACAT       | 4 |
| wt-123900-124020 | 3885 | CTTTGACGGCTTTCCACGGCCACCGCTGTTGCCAGCTTGTACGGCGGCTGAGTCCGACCCGGGCTGATCTCGACCCCTGCCGCCACAGCCGGCAGGTCAGACTTGGTGTCT          | 8 |
| wt-124020-124140 | 3886 | TCCGGCTTTTTCCGGTGAAGTCCACGATCCTAGCCATGAAATGCTCAAACGTACGCATCACGCGCCCGTAGCTCACGGCAGTACCAGGTTCTCCCCCGTACCACAAAGGAAGCATAGCT  | 4 |
| wt-124140-124260 | 3887 | CGAGGGCCCCATAATCTGGTTGTCGGCCTCTCACCCAGGAAGTCAAGAGCTGGCGCAGAAGCTTGTGGTGAACAATAAACACCCCCCTGAGTCTCCCCCTTGGCGTCTGTGTA        | 4 |
| wt-124260-124380 | 3888 | GGTACTGACCCCTTGGACAGCTCTCCCCGGACAGCGCGCTACCATCTCAGAGAGAGGGCTTCGCAGCTACTGAGAAAACCCGGAGCCCATGTTCTCGGCCGGTCCAGGAAGAAGGA     | 4 |
| wt-124380-124500 | 3889 | GTGCTCCAGCAGATGCCTTTGAACATGGCAATGAGTGCAGACTTGCAGCTTGTGAGAAACCCCTCTCAGTGAAGGTGGGATCCGCCAGGGTCTGCAGGATAAACATGGGAGGGGATG    | 4 |
| wt-124500-124620 | 3890 | GCGAAGCTTACACTCAGGACGGTGAATGAGGCCCTCTCCAGGGCATCGACCCAACTGTAGGGCCGAGGCCAGGCTTTCAGAGCCCCACGACTCTGCGTACTCGACCCGGGT          | 4 |
| wt-124620-124740 | 3891 | CTCGGGGATACTATGCAGGATCTCCAGATCCAGCATGGACAGTTCATTTCCGTAATAATGTGGTGTGTTGGCAATTTTTGACCACAATGAATGTCCGCTGCTTGGTCTCCCTCC       | 4 |
| wt-124740-124860 | 3892 | GTCCCGTGAAGCAATGGTGGGACGGAGATCGAAATGAATCTTCCATCCGTCATACGACTCAGGCTTTGAATTCGGTGTTCACACAGGACACGGCCAGTCCCGTCTCCAGGAAGCG      | 4 |
| wt-124860-124980 | 3893 | AACATATTTGGATGGCTTGTGTAGACCCGAGTAGCACCTCAAACCTGATGCCCGCTCTCTGGCATCTTGGCCACCAGCAGGTCAAAGCTATGAAAACACCCCTCAGCCGCTGACTG     | 4 |
| wt-124980-125100 | 3894 | CCGCAAGTTCGAGAGCAGTCCGCATCCACCCTCAGATAGGGGAAGGGTCTGTTTTCCACACCTCATTGAGGCCATGACACAAGGTAAAGAGGAGATGGGGGAGGCTCTCAGGGGCTT    | 4 |
| wt-125100-125220 | 3895 | CTCTTACAGCTGGGTCTTTTACGCCCTGGCTGCAACCCGACGCCACCCACACTTCCGAGGATGCTACCTTCTAATCAAATGGTTGGACACGGCCCTGGGCAGGGAGGCCACTT        | 4 |
| wt-125220-125340 | 3896 | TTACGCGTGTGGGCTATGCGCTTCTACTCGCGTATCCGAATGAATGACTGCCAGGAGCTGCCACCCGGTTAATAATTTGAGTCCGGGACCCCTCCCTGGCCCTTGGAGT            | 4 |
| wt-125340-125460 | 3897 | CCAGAGTCTGGAGCATAACAGACTGCGAAATATGGTCTCTGCCACCTGACCAGCTGCCACCTCCCGGTGCCAGGGTATCACATACACCGACTGCCGGGTTCCATAAACACGAG        | 4 |
| wt-125460-125580 | 3898 | CTCAATGTTTCCGCTTATCATCGCTACTTGTCTCATACCAATTTGAGCGCTGCTTCGAGCAGTCTCGCCGCTGGTCCCGCTGCTTCTAGGGACTGTAGCGAAACTCTGCAAA         | 4 |
| wt-125580-125700 | 3899 | GATGCTGCTCATCTGAATCAGGTTACCAGGATCCCCCTCTGCGGCCCTCAGCGGGCGGAGGCCAGACTCAAGTCCACTTCTTCTCCGAGACATTCATGCTGTATGGCCAAA          | 4 |
| wt-125700-125820 | 3900 | CAATGCCACTCCGGGAGATCAGGACAGGGCCGCCACCACTCACCCACCCACACTTAGTGGATCTGTACCTACCGCTCTCCGAGACCCCACTTCTGACACCGCAGCGGTGC           | 4 |
| wt-125820-125940 | 3901 | TCTATACCGCTTGTACCTGTGCAACTGCACCTGCCCAATATCTCCATCAGCAGTCAAGGCGGGACAGACCGGGGACCTGGAGATCATTACAGAGTAACGGCGAGGGAG             | 4 |
| wt-125940-126060 | 3902 | GCCCGCAGCTTCCAGTTCCTCCTCCCAACTGGCTCCCTATTGCGATGCATAGTTGCTGCGTCCCTGCTGCCGGAGGTCCGCTGGGGACCCAGGACTGTCTCCGCTGCGGTCAG        | 8 |
| wt-126060-126180 | 3903 | AAGCCAGGAGGGCAGACGGATGTCAGGTCGGGCCCGACCCGCGCCGAGACTGGTGGCCCTCTGCGAAGGGAAGATGGGGCACCTAAAGACCCCTCTGGACCGTTTGGACACCC        | 8 |
| wt-126180-126300 | 3904 | CCGGGGGCCCGGCCCGGCAAGAGCGAAGACGAGGAGTCTGAGCGTCGAGACGCCCTCCACCCCGCTCGATTCCAGCTTCCAGCTTCCCGGTTGGTCCCGTGGGGCTGGGTTTCG       | 8 |

|                  |      |                                                                                                                          |   |
|------------------|------|--------------------------------------------------------------------------------------------------------------------------|---|
| wt-126420-126540 | 3905 | CCTGTCGTGTTCAACACCAATCGGGTATCAACACTAAATTGGTGTGCTCAGAGCCCTGGTGAAGATGCGAGTTTGAATGTCCCCGCGCTCATCAACAACTTTGTAGCCGCAAGTA      | 4 |
| wt-126540-126660 | 3906 | CGTGTGAAAGAGACGGCGTACCCTCAGTCTATTCTTTACGGACGGGGTGGGGGCCAACCTAGCCATCAATGTCAATATCAGTGGCACCTATCTAGCTTCCATTGGCCATGACGTC      | 4 |
| wt-126660-126780 | 3907 | ACTGCGGTGCTTCTCGCTGTGGAGGCTATTTATCCCGCGCCGTGTCAAACCTGGAAGCTCAGTCTAGATCTCCATGGCTGGAAATCAGAGCCTAGTCAGAGAGAACCAGCGGGGT      | 4 |
| wt-126780-126900 | 3908 | CTTTTGACTACCAACTTTCCCTCGGTGGTGTCTGCGGGGACGGTCTCAACGTGTCTGTGTTAAGGCCCAACTGCCACCATATCTCGAGTGCACGGGAGACATTGGAGCAGCACCT      | 4 |
| wt-126900-127020 | 3909 | GATCCGTGAAATCACCCCATCGTACGCATCGAGAGCAAAAATCTCCCGGATTAACCCGCTCTTTACCTCGTAGAGCTACGCAATCGGAGTCAAGTGTGCACAAGCG               | 4 |
| wt-127020-127140 | 3910 | TTTTCTGGAAGCGCTGTAGACTGCGCTCCCTCTGCGCTGGATCCAGCTGTATCAACCGAATCGCTCCGAGGCTGTTTGTATTTCCAAGAGAAGCATCGCCACTCCAAAA            | 4 |
| wt-127140-127260 | 3911 | CCGACACAGTGCAGCTTCTGAGTCCAAACATTAAGCCCTCTCGCAAGCTATGATAGCAGAAAGCTGTAAACGAGCGCAAGCCCGCTGGACATCTGGCCGTAAAGCTATTTTAAACGAGTG | 4 |
| wt-127260-127380 | 3912 | TAAGCATCAGTTAATCTAAGACAGTCACTATTTTCTGACCCTCTGAGGCACATCCGCGCAGCTGTGGCCCTGGCCGCTTCCGTAACACGAGAGATTACCTTCTCTGGCCCA          | 4 |
| wt-127380-127500 | 3913 | CCTGCGCAAAAAGACAGCCCATCCACTGCGGTGATGCTCAAGTGAAGCAGCCGGGGCCGCTTCAATCAGGGGCGGTGCACCTGCCATCGGACAGATTGCTTCCACACCATCC         | 4 |
| wt-127500-127620 | 3914 | ACAGCCCCACTTTGCCTCGCGCTGGGACTGCCTGGGAAAAATGTACCATCCCGCCCTTCTCCGTGCTCGGGCTCAACGTCCTGAGAGCCTACCATGACCAACATGAGGGCAC         | 4 |
| wt-127620-127740 | 3915 | CGATCATCTCGCTGGCTGCCTCATCTGCCCCCAACCCCTATATCTAGAGGGACAGCTGACGGTGGCATGACACAGGACAACGCCATCCCGTCTTTTGGCCAGGCTGTCAATTG        | 4 |
| wt-127740-127860 | 3916 | AGGTAACAGCGGGCTGAGTCCAACTTAAGCCCTCTCGCAAGCTATGATAGCAGAAAGCTCTGCTGCTGAATCAGACTCGCCCTTTTCCGCATCAGAGCACCCCGCTTCCATGG        | 4 |
| wt-127860-127980 | 3917 | TTGAGTCCGTAACACGAGTCCGGTGTGATGAGGGAGCAACACCCGGCGCACCATCCGGGATTTCTGGAGATCCCGTACTGTGCTCTCATCCCTGCAACTGTCTCCCAACAGTCCA      | 4 |
| wt-128100-128220 | 3919 | CCGCGCAGGTGACCAAGTGTCTCATGCCAACCGCTCCCAACTCTTAAGGCTGGTCCCAATCCGGACTGTGCTGCTTCCAGCATTGTACTCAAGCAGTGTGCTAAAGAGTC           | 4 |
| wt-128220-128340 | 3920 | TGAATCTGGAGAAATATAGTGCAGGACTTTGAGGCCATCTTCACTCCCGTCTGATACCATAGTGAAGCTGAAACCAAGGCTTTGAGAAGCTGGTGGAGCAAGCAAAAAACCGTAG      | 4 |
| wt-128340-128460 | 3921 | AGAATAGTCTTTGCCTCAACAGCATCTGTCCACCTTACACTCCAGATGTCTGCCCGATGTAATAACCAAACTTAGCCTGGCTCTAGAGAAGTATTTTCTCATGTTCCCTC           | 4 |
| wt-128460-128580 | 3922 | CCTCAGGCACATTATGAGAAATGTAGATTTCGCCACCCCATCTGCTCCGGCTCTGTGCCAAGGGGCTGAGCTTGGCCATGGCACAGTTTCTAGGAAAGTACATCAAGGTCAAGGAGG    | 4 |
| wt-128580-128700 | 3923 | AAACTGGAATGTACACACTGGTCAAGCTTTATTACCTGCTGCGCATCTAAAGGAAAAACATAACAATCTTGTAACAGGAAAGATACCCAGAGCAAAAGCAATAAAGTACAGGATTATTG  | 4 |
| wt-128700-128820 | 3924 | CCAAAACACGTGTGCTCTTCTTCATACAGGCCGCAATTTCCATGACAGTCCCGTGGTGGTCAAGCAGCAGATAGTGAACGTGGAGTTGTCAAATCAAAGTGTGGAGCTCAAGA        | 4 |
| wt-128820-128940 | 3925 | TGGAGTTTGGACTTCTGGGAGGTGATGTAGTTGTAGTTTCCAGGCCTTCTTTTTCATCACTAAGTGCAGAGGCAAGCCAAATAAAGTGCAGGATTTCTGCTCCTGGTAAATTTCT      | 4 |
| wt-128940-129060 | 3926 | GGATCTTTGGAATCTGGCGGGCTCCCAAGCCACAGCACCCCTGCGAACATTTATTATAAGCGGGGAGAGAAAGAGAGAGCTGCTGAGATAGTGGTGTGGCTCGTATAGCGCCG        | 4 |
| wt-129060-129180 | 3927 | AGCCTCGGACTCAGGCTCAGAGATTGAATGTACATTGATGAGCGGGATAATCATCAAGACTTTGTGAGCCTGTCCACGATTTGTAGCGGGGAGATGCCACGATCCCTGT            | 4 |
| wt-129180-129300 | 3928 | CTTCTCGTCCAAAGAGAGCCGCCAAAGAAACCCATCCACAGCATTGAAACGCGCGCTGTCCAGCTTGCCTCCTGGGGGCCATGCTCAGCAGCTTGTCTCGTGTGAGGTCAAATC       | 4 |
| wt-129300-129420 | 3929 | GTAGGCTGAGGTAGCAGGTGAGAAGAGCCGCTCTGTGCCAGGGCTAGCCCGCAAAACCTCCCAATCTTAGGGCCGAGCACAGGGCGGTGGACAGCAGTTGGTATAGGGCAA          | 4 |
| wt-129420-129540 | 3930 | GGTTGGGCCCTGGGTAGTACAGTTCAGCCGCAACTCGCGTAGCACCAGTGGCTGCCGATAAAGAGGGTCTCTCTCATCAGGATGACAGGGGCTGGAAAGGGGGTGGCGGTTGATAGG    | 4 |
| wt-129540-129660 | 3931 | CCGAGAGAAGCAGATGTGGCGCTCCAAATGAGGCCACTGTAACCCCGGCTTGGGGTAGCCGACGGTGGTAACCTCAGCGGCTACTCTGTTTCTCAGTAGTCAAGTGACCCAGCT       | 4 |
| wt-129660-129780 | 3932 | CCTCCATCTTGACCGTGGCCATCAGCATGCGGGCAAGGCTCCAGCCGTAGGATTGCATGCCCTTGACAGTGGCCCAATAACATATGCCGATGATGCTTTTCAGGACAGTCAAGTCAA    | 4 |
| wt-129780-129900 | 3933 | AGAAGCTCTTGCCCAACCAAGCGGAGGTCCACGACGCACTTCCAGGCTGACCTTAAAGAGGGCCACAGAAACCTCAAACTAGGATGATGAGTCAAGGCTTCCCGTCCCA            | 4 |
| wt-129900-130020 | 3934 | GTTCCGGCTCCGGCAGCCTCCCTTCTCAGCAGGACAGTCTTCTGGAGAACGTAGCAGCGTGTGCTGGCGCTGTGATGGTACGGCTCGGGAAACATATCTTCCAGTTGGGTA          | 4 |
| wt-130020-130140 | 3935 | CAAAGTAGTTGAAAGTTGGCATAATGCACAAAGTTGTAACAATCACCAGGGAATAGTCCCGCTTTGGGCATGGTTAAGGATGGGTAACATAAAGGCCCCCTCAGATCCGGCAGGT      | 4 |
| wt-130140-130260 | 3936 | CCTTCGCTTGGCCAAAGACAGGCTCAACACATGCTCATCTCCCTTCTCGGTCACTCGCTTGTAGGTGCCATCAGAAATTTAGAAGTATGCCCCCGTGTACTGAAACTGTCCCCGT      | 4 |
| wt-130260-130380 | 3937 | TGATGGACAGGGCCACATAAGACAAGTACAGCCAGCTGATAAAGACATAGCTGTGTGCCCGTGTGGCAGCATGGTCCAAATATAGTAGAAGAGCTGCTTCTCAAGGGGGGCAC        | 4 |
| wt-130380-130500 | 3938 | TAAGCATGACAGGCGGGAATTCAGCCGCTAATGACTCCGGGATGGACTTAGATGCATCCACTTGCATGGATCTTCAGAGACAGCAGGGAATATCGACAGGCTCGCCAGCGCAATAC     | 4 |
| wt-130500-130620 | 3939 | CAAGGGTACCAGAGCTTGTAAATTAACCTGTAGCGGTTAAGCATAGACGCCAAATCTTCGGTGACATTTGCCTCTCCACAGCGCTCTGGGCTAAGGCTGGGACCTTGGCATCA        | 4 |
| wt-130620-130740 | 3940 | GTTGGTCCATGGGATGGTGAATGCGAAGCATGCCCTCTATGTCCAGGTGCAGCTTAACTCGCTGAGGCTGGCAGCCCCACCTCCCATAGCAACACCAGGCAAAAAACAGAGCA        | 4 |
| wt-130740-130860 | 3941 | ACTGCATCCTAGTCCGATTTCCCTCTCAAATCAGAGATCACTTGTCTCAGACAGCCCAATCGAAAACTGAGATCGTATTGCCGGATTTCTCAATGCCTGCATGTAATCTCCGTC       | 4 |
| wt-130860-130980 | 3942 | CAGCATCCAGGTAATCGTCTGAACTCTGAGAGGTCCACAAGCACAACCTGAAGTGTAGGCTAGCGTTCGGGTGAACGCAAGACAACCTTCAAACAACCCCGCTCGGCTCGAAAGGC     | 4 |
| wt-130980-131100 | 3943 | TGATGACTTCTTAAAGTACACTAAAGATGCTGTTCTTATACAGCTTCTCGGCCACACCACTTCAAAATATGGGGTGTGGCTTTGATGACATACTGCTGATTGTTGTAGACCCGCA      | 4 |
| wt-131100-131220 | 3944 | CATACCTCACAATGCTCCTGGGGGCAAAACTGTGTTAGGAGCCAGGCACAGTAAACGGCGTGATATGCATCGTTGACACTCTCAGGTAGCCAGCATCCAGTCTGACTCATGTTTC      | 4 |
| wt-131220-131340 | 3945 | CTCCCTCGCTTCTCAGCGGGCATGTTCTCTCCAGCTTAACTTATCCAGACTATGGTGTCCCGGGTCTCGGGTAAACGTGGCCAAAACCTGAAATAAAGTCACTATAGGAGAGA        | 4 |
| wt-131340-131460 | 3946 | AGCTGGCTCCGGAGCAGCATTAGAGGGAAACACAGGAGCCGACAGCAAAATGCGCATGATGCAAAATCCAACTTCAAGGGGCGGACTGACCTGGCACCAGACTCGGTAACAGCAAG     | 4 |
| wt-131460-131580 | 3947 | CTCCGCTTCTAGAGGCCAAGACTCTGAAAGGGGTGGTAAATTTCTATCGCATGCTAAACCTCAGCCGACGTGCTTCCCTTCCATGCCTCGCCGAGTCACTTCTGTGCATGGCC        | 4 |
| wt-131580-131700 | 3948 | TTAATGGCATTTCATACACATGAGTCCAGTACCCGATCGGTTGAGGACTCAATGTTGAGTCCCAAGAGCAGCCTCAAATGATTTCAGCATAGTAGTCTTCCACACAGGGGCA         | 4 |
| wt-131700-131820 | 3949 | CCTTCCAAAATAGGGAACAGGCAGGTTTATTACTGGTACATGATTTGTTAGGTGGTCAAAATGGAACCCGATGCTCTCTTCTGAGCCTTGGCTGGCGGTTGCTTGGGCA            | 4 |
| wt-131820-131940 | 3950 | TCATCCAGATTCAAACTTATCACACTCCACTTAGCCGCTTCAAGTGGCAGCATGCTTGGATAACTTAACTCAGCCCATGGGCGCCAGGTGTTTCAAGAGACCAGAAGGC            | 4 |
| wt-131940-132060 | 3951 | TTACCTTGCACCACTTCTTTGTTTAAACGCGGAATGAGAAGAGGGCTGCGGAAATAGACTCATCTCAGACTCAGAGTCAAGATTGTCATCAGGCCAAGGCCGCGCCAGCCCTCC       | 4 |
| wt-132060-132180 | 3952 | TCAAAGCCTTCTGGTACATGAAGCTCGGCTGGTGGAGTCCGCACCTCTGTGTCACGAAGTTTGGCGAACAGGAGAAGGGTCTGGCGTCTTGGGGCCACACTCCCGGCTA            | 4 |
| wt-132180-132300 | 3953 | GGGGCTTCCGGGTAGGGCAGTAGGCTTTGGTGTCCGCTGCTGGTGGCTCCCTGGGAGGCAAGGGGACAGATGTGTGGCGGCTACCCGGAGAGTTTCCAGATTAGAT               | 4 |
| wt-132300-132420 | 3954 | GTCAGCGACGCTGGTCCGGCACGGCACCCTTCCCAAGACAGTCCGGTCCGGAGCCATCAAGGGGGCCAGTGGGTGGCACCTGTAGAGCCGCTGCTATCTTCCACTGCCCCT          | 8 |
| wt-132420-132540 | 3955 | GAGTCACTACCGTGGGGTAAAGACTGAGGGGGCAAGTCACTCAATCTCAGCGTAAAGTTTCTGTTCTTCTGTTTTCAGGGGACTCATCTCTGACATTTTCCGACAGCCCGGGC        | 4 |
| wt-132540-132660 | 3956 | GGCCCGCCTCTTCTGAAATCCAGCCATGGATCCACCCGGGGTCTGTGTGCCCTCTCCACACAGACCTGGCAAAATTCACAGTCTTCCCGGCTAGAAAGGGCGCAGGTAAG           | 4 |

|                  |      |                                                                                                                          |   |
|------------------|------|--------------------------------------------------------------------------------------------------------------------------|---|
| wt-132660-132780 | 3957 | CGAGGCGACCTTCGGTGTACTCCAAGCTGCTCTCTTTAAGAGCTGGGAGCAACTGGCCTCTTTTTGTCTCGCCCGGGGACCACGTTTACAGACTTTAGACTATTTTTGAAGTC        | 4 |
| wt-132780-132900 | 3958 | ACCCTGGGTGGGAGAATCGCAGATTGCGTGTGGTAGCTCTGCAGCCTTATCCCCGGTGTATATTAGATAATTTAAGACGGCCATGAGCAACACGGCCAACCCGCAAAAGCGTTACTCGC  | 4 |
| wt-132900-133020 | 3959 | AAGGCACAGAGGCTAGAGGGCACCCGCCAGTTGTGTGACTGTGCCAATTTCTTCGCACGTCTGCCCCCGTCTGGGCAGTCAGGGCCTGGAAGTCTTGGCGCGTGGTATTTAAA        | 4 |
| wt-133020-133140 | 3960 | AACCAGCGATCCCTGAGAACGCTCCAGGTAGAGTTTCCAGCCCTGGGCAAAAGACCCCTCCCCACCTCCACCACCGGCCTGCTAAACCTCTCTCCCGTGGCAGATGGCGCTCTCCGG    | 4 |
| wt-133140-133260 | 3961 | GCACGCTCTGATAGACCCCGCCAGTGGCCAGGACACAGGCCCGGAACCTCATGTGGGCCCAAGCCTTCGAACTCACTGCGCGTGTCCCCGGAAGCGCTCGAGCTGGCAGAGCGGGA     | 8 |
| wt-133260-133380 | 3962 | GGCCGAAAGGGCCAGTGGAGCGGTGGACAGGTGTGCCAGGTGTCAAAAATAGGCTGCTCCGGCTGGAGCTGGACGGCATCATCGTGCACACTGGCCAGGCGGAGGAGATCCG         | 8 |
| wt-133380-133500 | 3963 | CCAGGACCTGGATGCTGATGGCCTCTCTGATGGCCCTGAGCAGCTCAATAGAGCCCTCAACCAGCAGCGCCCATCCACGGAGCGCCTCTGGCCAGCCCGCCTCCCATCCCAAGCCGCTT  | 8 |
| wt-133500-133620 | 3964 | CACTCGGCTCACCCGGGAACGCCAGTAGTGCAGTCTCAATCTCTCCACGGACCCCTCTGATGGTGGCCGGCAGCCTGGCTCAAACGCTGCTTGGTAATCTGTACGGGAACATCAACCA   | 4 |
| wt-133620-133740 | 3965 | GTGGGTACCGTCTTCGGACCTTGTACAGGACCATGTCCGGCTAATGCCATGCAGCGGCCTGTTCCCTAAGCAGCTGAGGGGCAACCTGAACCTTACCACCTCCGTCTCCCTAAAGCT    | 4 |
| wt-133740-133860 | 3966 | GATGACAGAAAGTGGTGGCGGTGCTTGGGGCACCACCCAGGACTTTTTCTCAGACGTGAGGCACCTGCCAGACCTCCAGGCTGCCCTGATCCTCTCGGTGGCCTACCTGCTACTCCAGGG | 4 |
| wt-133860-133980 | 3967 | GGGCTCTCACACCAGCAGCCCGCTCCCTGCTCACGGGAAGAGCTCTGGAGCTGGGCCGGGAGAGCCTAGAGAAAATCATCGCCAGCTCAAGGCCAAGTCAACCGCGGAAATTT        | 4 |
| wt-133980-134100 | 3968 | TATGATTTTAAACAGCGGAAACAGGAAGCGCCAGTCAATAGAGCCCTCAACCAGCAGCGCCCATCCACGGCAGCATTTCGCGGACAATAAGATTTTACAACCTGTTTTGGGGAGC      | 4 |
| wt-134100-134220 | 3969 | GGGACTACTGCCACGACGCCCGCTGAACGTGCCCGGGGGCGGGTGGGACCCGGACCTGGTGTACCGGATCGCCAACCAGATCTTTGGGGAGGATGTGCCCCCTTCTCATCTCA        | 8 |
| wt-134220-134340 | 3970 | CCAGTGGAACTGCGCGTAGTGTAGCCGCACTCGAGGCCCTGATGCTGCTACACGCTCTGCGAGACCGCAACCTGGCCGAGGGGCCACCCGGCGTCTACACCTATGTCCTGCT         | 8 |
| wt-134340-134460 | 3971 | CCCCAGGCAATGCAGCGCGCAAGCTGCCATGGCGCTCAGCTGGTATGCCGGCGCCTATCCAGTCCAGACGCTTTCCGCCACGGGGAGCTTCCGCTTATCTGGGCCACTACGT         | 8 |
| wt-134460-134580 | 3972 | GAGGCCACGGTGGCGGCAGACCCAGGCCCTCCATCAGCTCTTTTTCCCGGGCTGGTTTTGTGGCCCTGGAGCTGAAGTTGATGGATGGCAGGCTCCCTCCATTATGCCATAAA        | 4 |
| wt-134580-134700 | 3973 | CCTGACCCGACAAAAGTTTGACACCCTTTGAGATTATCAACCAGAAGCTTTTATTTTACGACCCCGCTGCCATGCTGGCGGCGGCACACAGCTGCGTCTAGCCTTCGAGGACGGCGT    | 4 |
| wt-134700-134820 | 3974 | CGGTGTGCCCTGGGCGCCCCCTGCCCATGCTTGCGGCGCGGAGATCCTGGAGCGTCAGTTCTCAGCCTCGGATGACTACGACCGGCTGACTTCTGACGCTGGGTACCTGGCCTC       | 8 |
| wt-134820-134940 | 3975 | CCCGTGGCCCCAAGCTGAGCCAGTTCCTGCACTGGAGTGGGTATTGGCAAAAAGTAAATAAATCATCGCACGGGGTTTTGCCTCCTCTGCTCTTTGTTGGGTAGGGGAGT           | 4 |
| wt-134940-135060 | 3976 | AAGGCGGTGCCAGGCCCATGCTCAGGGCCAGCGCTGCCAGAGGCCCTCGTAGTCTGCGCATTCCGAGAGGATGGCAGGTCAGAAAGCAGATAGCCGGCCAGGCAGAGGAAGGCCAC     | 8 |
| wt-135060-135180 | 3977 | AAAGAGGGGGCAAGGCGTGGCCGAACCCGGTTTTCATGCTGCTGCACCCAGTGGACAAGGCAGTAGAGGACACCCACCAGGCGGTAGGGAGGACTGCCAAGGTTGAAGAG           | 4 |
| wt-135180-135300 | 3978 | CAGATTTCCGTACGCCAGGCTGACCTGGCTCAGTCCGGCGCCTGCGCAGCTCAAGCTGGCCACACAGATGCACAGCGGCCCTGTGACATCGAGCCGGTATGCAGCCAGCAGACA       | 4 |
| wt-135300-135420 | 3979 | GCGGTTTCCAGTATTTATCACGGCTTCCCGCCACAGGTAAAAGTTAACACTTAGGGTACGAGCTTGGTCAAGGATAGGTGCAAAAACCTGAGCTCGCTCCGCGCAGAGCGCAAGCGG    | 4 |
| wt-135420-135540 | 3980 | CCAGTCTTTAGCATCTTCCAGGAGGCCGTGAATCCAGGTGCTATTGCGCGTCACTCCCGCGCACCCCGAGTCCATTAAACATAGCGGGCACAATGGTGCAGGCACCGTCTGTATA      | 4 |
| wt-135540-135660 | 3981 | CGTCTGCCGCTTCTGTGGAGCGCCCGACGCGCCACCAAGGACCGCTGCTTACCTGGATCCCTCACCCTCAGAGCCAGCTCCCTCTGAAGAAGCCCTTGCACACTACGGTGGAAACA     | 8 |
| wt-135660-135780 | 3982 | CCTGCCGGATGCTCCGGTGGCTCAGTCTTTGGCCTTTACCAGAGCCGAGCGGGTCTTTAGCGCAGCTCGATTACCTCTGGGGACTTCTGTCCCTGCTGGACTCAATTTACCACCA      | 4 |
| wt-135780-135900 | 3983 | TTGGATATTGCACAGAGTCAGCGCTGCCCTCCCTCGAGAACAAGGTGGAGGCTGCGACGCTGGCTCCCTCACTGTCAGTGCCTCCCTCACCCAGACATACCCCAACCCAC           | 4 |
| wt-135900-136020 | 3984 | CGCAGATGGAGGCAAGCTGCTCTTTGACCACGTGCTATCTGTCGCCCTGGTCTGCGCGCGGACACCGGCAGTCTACGGTACAGACCTTGGTGGGTCTGAAGCATTTAGTGA          | 4 |
| wt-136020-136140 | 3985 | CCTGGAACCGTCTATCGCCGCCAGATTGAGAATGACGCCAATGCCGCAAAAGCGTGAATCCGGATGCCCGGAAGACCCTCTGCCCTCACGAAGCTCATAGCTAAGGCAATCGATGC     | 4 |
| wt-136140-136260 | 3986 | TGGATTTCTGAAAAACCGGTGGAGACTCTGAGGAGGACAGGGGTGGGCCAATATCCAGCCGAGTCTGATTTAAAGGCCAGCGACGCCCGGACTACAAAAGCCGGACAAGGCACT       | 4 |
| wt-136260-136380 | 3987 | TCAGAGCCACCACCGGCTCCACAGACCCAGCCACCATGCTATCAGTAAACGCAAGGAGAAAGGAGCAACAGCTGCGGAGGTTGCGCCGCGCGGGCCAGGACCTCATAGCTCCCGCG     | 8 |
| wt-136380-136500 | 3988 | CAACACCTTTATGACTGCTTTCAGACAACCTGGACAACAACCGCCAGGACAGCCCGCTACCTACGCGGCCCGCTGCCCCCTTTTCCACCCAGGCAATAGCCACCGCGCTCT          | 4 |
| wt-136500-136620 | 3989 | CTACGGTCTGGGGCCGGAGCGGTGCCCCGGCCGGCGCTACTTTACCTCCCAAGGAGTTACTACGCGGGCCCGGGGGGGGACCCGGGTGCCCTTTTGGCGATGGACGCTCACAC        | 8 |
| wt-136620-136740 | 3990 | CTACCACCCCAACCACACCCCTCCGGCCTACTTTGGCTTGGCCGGCTCTTTGGCCCCCTCCACCCGCTGCTCTTACTACGGATCCCACTTGCGGGCAGACTACGTCCTCCCGCTCC     | 8 |
| wt-136740-136860 | 3991 | CTCGCGATCCAAACAAGCGAAAGAGACCCCGAGGAGGATGAAGAAGCGGGGGGCTATTCCCGGGGAGGACGCCACCTCTACCAGCAAGGACATAGCGGGCCTCTCCAAAGAGTGTGAA   | 4 |
| wt-136860-136980 | 3992 | GCCATCAAAGCTACGAAAGTCCCGCAGATAGTCCCTCATCCGCCCCACCACCACTTCTCACCAGGCACTCAGCGCAGCTCCACCCCGGGCACACAGGCCCGGCAAGGCCACTG        | 8 |
| wt-137100-137220 | 3994 | TGTGGCCGAGTCCACGATCCCTGAGCGGGGAGCAGCCGGAACTCTGGACCCGGGAGGACACCAACCTCAGCAGCCACCAGGAGGCCACCACCGGAAAGAACTGGTGCAGGC          | 8 |
| wt-137220-137340 | 3995 | CTCTGCGTCCGGAGTGGCTCAGTCTAAGGAGCCCAACCCCAAGGCAAGTCTGTGTCAGCCACCTCAAGTCCATCTTTGGCAGGAATTGCTGAATAAACCGCGTGGCTTGAAGTA       | 4 |
| wt-137340-137460 | 3996 | AACTTTATGCGTGTAGTACCTGTCCATTACAGGGGTATCCAGCCCTTGCGCCGCTCCCGCAGCCCGCCAGCCACCCAGACAGGAGATGATAATGATGAGGAGCACCAGGACCC        | 4 |
| wt-137460-137580 | 3997 | ACAGCACAAGTGATTAGGAGCAGGGCCAGTGCACCCAGGTGGTCTTAGGGCCGAGGATCGATTGGAAAAGGGCCAGGGTCACTGGCTTATGCGTGGGACGTTTGAACAAGGCCG       | 4 |
| wt-137580-137700 | 3998 | CTATGGGGCCTGTGACTGGTGTCTGGTGTGGGAGACTAATGTTGGTGGGGCTATGGTAGTGGCTGGGATAACAGTAAGATGCATACGCTGAGTGGGTCCGGTTGGCATGGATTGG      | 4 |
| wt-137700-137820 | 3999 | TCGCTCTTCCCTGCAGAGTAATTCAGTGGACCCCGAGGCCACACTGCAATTTCTCAGTGTACATTGCAGCTGTAGTAACTGCATGCGCAAGGGTCACTTTGGGATTATCAGA         | 4 |
| wt-137820-137940 | 4000 | GAGACGGAGGTGGAGTCAATTTGCCATTTAGGCTATGGGTAAGGCTATAAATTTGAAACCCCGTAGTATATGAGTTCGGTGTGGAAAGTACGACGGCCAGGGCAAGTGTCCATCCCG    | 4 |
| wt-137940-138060 | 4001 | GGAGTGTATCCCCGCCAACTCGATCCAGAGACCGACTATTGCTAGGAACGCTGCAGGTGAGATTCACTAGCACCTGCATGGCGGTGACATTTTCAAAATTAACAGACTGAG          | 4 |
| wt-138060-138180 | 4002 | AAAAATGCACAAAACAGCCACACAGCAGCACAATAGAAGCACTAAATGAGTCAATCTAAACTGTCAGTTTTAAAACCTCCCTGCTTCTCAGGCCTAAATATGTTGGTGGGTGTGCTTA   | 4 |
| wt-138180-138300 | 4003 | GGATCACTTTCATATCTGCAACAACAGCCATACCCGGAAGAGGAGTGCCTGTTGCCATTTTTCAAGCTGCTAAACCACGAGTGGCAGCAGGCCAAGAAGCTCCTCAGCAACATGGAG    | 4 |
| wt-138300-138420 | 4004 | ACCTCGAAGGGAACCTGGCAGGAGCGGGAGTCAAGTAGGCTAGCCCTTTCATGTAGGTAACAGACTGCTAAAAATGGGATCAGGGTATGTAACCCGAGTTTGGCGGGAGTGGTA       | 4 |
| wt-138420-138540 | 4005 | GCCAGACCGCGGGTGGGGAAGGAGCTGACACGATTGAGTAGAAGGGCCAAAATACAGACTATAAGGAATTTGCTCAGGCAAGTGTTCCTCAGGTTGGCTTTAGGCTTAATGT         | 4 |
| wt-138540-138660 | 4006 | AGGCAATTCGCTGCTAGAACTTGTAAATGTCGCCCTGGTTTTCTGCCCTCATGCAATAATTTCACTCCCGCGCTGGTGCAAAATGCTGCCCTCAGAACTAACAGCTAATCCAA        | 4 |
| wt-138660-138780 | 4007 | GCTAACATTCTATCAGTAAACGGGCAGAAAACCTGATAAGGACCGCGGAGTTGGCCCTCCGCGTGTCCGGTGGTCTCACAGTGCCTCCCGCGGGCCGATGGCTGAGGCCCGAAT       | 4 |
| wt-138780-138900 | 4008 | ATGCAAGTGCATCTTCTAACAGTAGGGGCTCCACCTAGTGCTTTGTAATCTTTAGTGGAACTAGTGGGAGTGTGCTCGGGTACCCCTATCTTATAGGCTTACCAGGAGCT           | 4 |
| wt-138900-139020 | 4009 |                                                                                                                          | 4 |



|                  |      |                                                                                                                          |    |
|------------------|------|--------------------------------------------------------------------------------------------------------------------------|----|
| wt-139020-139140 | 4010 | CCTTGTCTTGATAATCCCTGTAAACACACACCACCTAAGAACAAGGCATTGTAAACCTTTGGTGGAACCTAGTGTAGTGTGTGCTGTAAATAAGTGTCCAGCGCACCACTAGTGACCA   | 4  |
| wt-139140-139260 | 4011 | GGTGTCCACCGAGGCTACTTGCCACAGTGCCACTTTTACCTTCTCAAATCTATACGGGGGGGGGGGGCTCTGTAAACATTTGGTGGACCTGATGCTGCTGGTGTGCTGTAAATAAGTGTG | 4  |
| wt-139260-139380 | 4012 | CCTAGCACATCACGTAGGCACCAGGTGTACCAGGGGCTACTTGCTCCGGCATCTCTCACCAGGAGAAGGGGTAAACAAACCCGTTGGGGGTCTTAGTGGAAAGTACGCTGTGAATACA   | 4  |
| wt-139380-139500 | 4013 | GGTCCATAGCACCGCTATCCACTATGTCCTCGCCGGGGTATATGTCGCTTACCTCCCTATATAGTACAGACCCACCAGCCAGGCATGATGAGAATAAAATTTATGCATCATCTT       | 4  |
| wt-139500-139620 | 4014 | CTAATCTGTGCGCGCTTGAGAGGAAACATGACCACCTGAAGTCTGTTAACACAGGTCACTGGTTTGTTCCTTGATAGAGACACAAGGACTGCCAGCCCCATTGGGGAGGGGGGTGGGTA  | 4  |
| wt-139620-139740 | 4015 | CGGGAGAGTTGGGCTCGTTAAACAAAGTCTCATGTCTCTGGCACCTCAAGGTGAATATAGCTGCCATCGACGTATGCTGGAACCCGGTGGCCGCTGTTACCTAAAGTGTG           | 4  |
| wt-139740-139860 | 4016 | ACGCAAGGTTGTACAGCCGCGCCGTTTACCAGGCTTTCAGGTGTGAAATTTAGATAGAGTGGAGTGTGCTTGTGTTAAATACACCAAGATACACCACCTCTATCCATATCCCA        | 4  |
| wt-139860-139980 | 4017 | CAATTGATAAACCTCCGCATGTCCAACACCACGTTGAACAGGATGTGGCACCTAAGAGGACGCAGGCATACAAGGTTATTACCCAGTCTCTGTATGCTGGTGTCCCTTAGTGGGAC     | 4  |
| wt-139980-140100 | 4018 | GCAGGCTAGGTAGCATCAATTACACTAAAAGCAGTACCTTGTGGTACTTTAAGGTTGGTCCAAATCCATAGGCTTTTTTTGTGAAAACCCGGGGATCGGACTAGCCCTAGAGTAACCT   | 4  |
| wt-140100-140220 | 4019 | AAGGCCAAGCATTTACACCTGCAATGACACATGTAAACACAGATCTAAACTGAAAAGTGTGACGTTTAGATGGCAAGGAAACTGGGTTTCAGGCATAGAAAAGCTGGCTCACTATAGC   | 4  |
| wt-140220-140340 | 4020 | AGCCCATGTTGTTCCAGGGTGGGGAAAGGCACGTGCCCTTAGAAAACTTAGCTGCAAAAAATCTATTGTTGGGAGAGCCTATATATCAAAGGCCTTTCCCTACAATAAAATGTT       | 4  |
| wt-140340-140460 | 4021 | ACTAACGTGTCCCTCTGGAGACGCTACTATGTGGCTAGACGTATGGCCACCCAAGACGTTAGAGGCTCTCGGGTGGCCATGATTCCTCCAGCATAGTTACAACCACTGACTGCTATC    | 4  |
| wt-140460-140580 | 4022 | AAGCCTACTCAGTTCCCAACGCAGCACATACCCCCGCTCTCTGCCATGAGGACTTATGGCAGTGTACTGTCTGCTTTTACTCTTGACCAGGCTGTCATTCTATCAGAATAACA        | 4  |
| wt-140580-140700 | 4023 | GGGGAAGCAAGGCCCTGCTTCAGCGGGACACGTTTCTAGAATCTCGGAGCCAATAACTACCTGCCCTCTAATCTGTATGTGCATGAAAACACACATACAGTGATGTAAGTTTA        | 4  |
| wt-140700-140820 | 4024 | GCCAGTTTATTGTTACACCAATGCCCGAAAAGTCTCCCCCTGTCCTTTGGGTCTCAGAACCCAGCCCTGGAGCTCGGGGCGGCGGGTGGCCACCAGGGTCCGCTGGGTCCGCTGCC     | 8  |
| wt-140820-140940 | 4025 | CGTCCGGCGGGGGTGGCCGGTGCAGCCGGTCCGGGTTCCGGCCCTGGAGCTCGGGGGCGGCGGGTGGCCACCAGGGTCCGCTGGTCCGCTGCCCCGCTCCGGCGGGGGTGG          | 12 |
| wt-140940-141060 | 4026 | CCGGCTGCAGCCGGTCCGGGTTCCGGCCCTGGAAGCTCGGGGGCGCCGGTGGCCACCAGGGTCCGCTGGTCCGCTGCCCGCTCCGGCGGGGGTGGCCGGTGCAGCCGGTCC          | 12 |
| wt-141060-141180 | 4027 | GGGTTCCGGCCTGGAGCTCGGGGGCGGCCGGTGGCCACCAGGGTCCGCTGGTCCGCTGCCCGCTCCGGCGGGGGTGGCCGGTGCAGCCGGTCCGGGTTCCGGCCCTGGAG           | 12 |
| wt-141180-141300 | 4028 | CTCGGGGGCGCCGGTGGCCACCAGGGTCCGCTGGTCCGCTGCCCGCTCCGGCGGGGGTGGCCGGTGCAGCCGGTCCGGGTTCCGGCCCTGGAGCTCGGGGGCGCCGGT             | 12 |
| wt-141300-141420 | 4029 | GGCCACCAGGGTCCGCTGGTCCGCTGCCCGCTCCGGCGGGGGTGGCCGGTGCAGCCGGTCCGGGTTCCGGCCCTGGAGCTCGGGGGCGGCCGGTGGCCACCAGGGTCCGCTG         | 12 |
| wt-141420-141540 | 4030 | GGTCCGCTGCCCGCTCCGGCGGGGGTGGCCGGTGCAGCCGGTCCGGGTTCCGGCCCTGGAGCTCGGGGGCGCCGGTGGCCACCAGGGTCCGCTGGTCCGCTGCCCGCTCC           | 12 |
| wt-141540-141660 | 4031 | GGCGGGGGTGGCCGGTGCAGCCGGTCCGGGTTCCGGCCCTGGAAGCTCGGGGGCGCCGGTGGCCACCAGGGTCCGCTGGTCCGCTGCCCGCTCCGGCGGGGGTGGCCGGT           | 12 |
| wt-141660-141780 | 4032 | GCAGCCGGTCCGGGTTCCGGCCCTGGAGCTCGGGGGCGGCCGGTGGCCACCAGGGTCCGCTGGTCCGCTGCCCGCTCCGGCGGGGGTGGCCGGTGCAGCCGGTCCGGGTT           | 12 |
| wt-141780-141900 | 4033 | CCGGCCCTGGAGCTCGGGGGCGCCGGTGGCCACCAGGGTCCGCTGGTCCGCTGCCCGCTCCGGCGGGGGTGGCCGGTGCAGCCGGTCCGGGTTCCGGCCCTGGAGCTCGGG          | 12 |
| wt-141900-142020 | 4034 | GGCGCGCGGGTGGCCACCAGGGTCCGCTGGTCCGCTGCCCGCTCCGGCGGGGGTGGCCGGTGCAGCCGGTCCGGGTTCCGGCCCTGGAGCTCGGGGGCGGCCGGTGGCCCA          | 12 |
| wt-142020-142140 | 4035 | CCGGTCCGCTGGTCCGCTGCCCGCTCCGGCGGGGGTGGCCGGTGCAGCCGGTCCGGGTTCCGGCCCTGGAGCTCGGGGGCGCCGGTGGCCACCAGGGTCCGCTGGTCCGCTCC        | 12 |
| wt-142140-142260 | 4036 | CTGCCCGCTCCGGCGGGGGTGGCCGGTGCAGCCGGTCCGGGTTCCGGCCCTGGAGCTCGGGGGCGCCGGTGGCCACCAGGGTCCGCTGGTCCGCTGCCCGCTCCGGCGGG           | 12 |
| wt-142260-142380 | 4037 | GGGTGCGCGGGTGCAGCCGGTCCGGGTTCCGGCCCTGGAGCTCGGGGGCGCCGGTGGCCACCAGGGTCCGCTGGTCCGCTGCCCGCTCCGGCGGGGGTGGCCGGTGCAGCC          | 12 |
| wt-142380-142500 | 4038 | GGTCCGGGTTCCGGCCCTGGAGCTCGGGGGCGCCGGTGGCCACCAGGGTCCGCTGGTCCGCTGCCCGCTCCGGCGGGGGTGGCCGGTGCAGCCGGTCCGGGTTCCGGCC            | 12 |
| wt-142500-142620 | 4039 | CTGGAGCTCGGGGGCGCCGGTGGCCACCAGGGTCCGCTGGTCCGCTGCCCGCTCCGGCGGGGGTGGCCGGTGCAGCCGGTCCGGGTTCCGGCCCTGGAGCTCGGGGGCGG           | 12 |
| wt-142620-142740 | 4040 | CCGGTGGCCACCAGGGTCCGCTGGTCCGCTGCCCGCTCCGGCGGGGGTGGCCGGTGCAGCCGGTCCGGGTTCCGGCCCTGGAGCTCGGGGGCGCCGGTGGCCACCAGGGT           | 12 |
| wt-142740-142860 | 4041 | CCGCTGGTCCGCTGCCCGCTCCGGCGGGGGTGGCCGGTGCAGCCGGTCCGGGTTCCGGCCCTGGAGCTCGGGGGCGCCGGTGGCCACCAGGGTCCGCTGGTCCGCTGCC            | 12 |
| wt-142860-142980 | 4042 | CGCTCCGGCGGGGGTGGCCGGTGCAGCCGGTCCGGGTTCCGGCCCTGGAGCTCGGGGGCGCCGGTGGCCACCAGGGTCCGCTGGTCCGCTGCCCGCTCCGGCGGGGGTGG           | 12 |
| wt-142980-143100 | 4043 | CCGGTGCAGCCGGTCCGGGTTCCGGCCCTGGAGCTCGGGGGCGCCGGTGGCCACCAGGGTCCGCTGGTCCGCTGCCCGCTCCGGCGGGGGTGGCCGGTGCAGCCGGTCC            | 12 |
| wt-143100-143220 | 4044 | GGGTTCCGGCCCTGGAGCTCGGGGGCGCCGGTGGCCACCAGGGTCCGCTGGTCCGCTGCCCGCTCCGGCGGGGGTGGCCGGTGCAGCCGGTCCGGGTTCCGGCCCTGGAG           | 12 |
| wt-143220-143340 | 4045 | CTCGGGGGCGCCGGTGGCCACCAGGGTCCGCTGGTCCGCTGCCCGCTCCGGCGGGGATGGGGTGCCTCCAGGCCGACCTGGTGCAGGCAGGGACCCCGCCACCAGCT              | 12 |
| wt-143340-143460 | 4046 | TCATGGGGGGAGCCCGCCAGGACCGCCGGTGGAGGTGTGCACCCCGAGCGCTGGAGCAGCTGGCGAGCCGGCCAGCTCGCTTTTATCTCTTTTGGGGT                       | 8  |
| wt-143460-143580 | 4047 | CTCTGTGCAATACCTTAAGGTTTGTCTCAGGAGTGGGGGCTTCTCATTGGTAAATTCAGGTGTGTGATTTTAGCCGTTGGGTTACATTAAGGTGTGAACCAAGTGGGTGGTACCTGGA   | 4  |
| wt-143580-143700 | 4048 | GGTCACTTATTGGGATAACGAGAGGAGGAGGGCTAGAGGCCCGCAGATTTGGGGTAGGCGAGCCTCAGGAGGGTCCCTCCATAGGTTGAACCAAGGAGGGGAGGATCGGGTCC        | 4  |
| wt-143700-143820 | 4049 | GCCCGATACCTAGTGGTGGAGCTAGAGTAGGTATCCATAGGTTCCATTATCTGGAGTATCTAAGCTCCGCCCTATATACAGGTGGTGGAGTATAGTATGAGT                   | 4  |
| wt-143820-143940 | 4050 | AGGTTCTACTGGGTACCCCTACCCTACCTTAAGGTGCGCCACCCTCCTCCTCCGTTTAAATGGTAGAATAACCTATAGGTTATAACCTAGTGGTGAATAGGTTATTCAGCT          | 4  |
| wt-143940-144060 | 4051 | GGGTATATACCTATAGGTATATAGAAGTAGAGGAAAGGAAACCTATAGTGTAAATCCCTCCCCCTACCCCTCCCTTACGGTGTGCTGAGCCATCCCCACCCAGCACCCTG           | 4  |
| wt-144060-144180 | 4052 | GGGTGACGTGGACCCCGCTGCTTACTGACTTGTACCTTTGCACATTTGGTGTGAAATTTGGTGTGAAATTTGTCAGCTGACCATGCTCGCCCTGCTGGTATGACCTGGCTGTGCCCTGTC | 4  |
| wt-144180-144300 | 4053 | CCCTCAGCGTGGTGGCTGCTTTGGGATGCATCACTTTGAGCCACTAAGCCCGTGTCTCGCTTGCCTGCCTCACCATGACACACTAAGCCCTGCTAATCCATGAGCCCCGCTTT        | 4  |
| wt-144300-144420 | 4054 | AGGAAGCACACGTCGCGGGACGGAAGCTGGATTGGCCAGTCTTCAATTTGGGAGTGGTTTGTGTGAGCCGGAAGTTGCAATGGGTGAGGGTGGCCTGGTTAAGCTGACGA           | 4  |
| wt-144420-144540 | 4055 | CCTCCAAAGTCTCTCACCTGGGTACACAGTGGGGCGGACGCTCAACTTTGGCTGTGGCTTATTCTCCCTTCTAGCCAGGGCCATGTTTCTCTGATGCTACTTGCCCT              | 4  |
| wt-144540-144660 | 4056 | CTGTGGTGGCAGACTGGCCCTGCTTCCGCCCCGCTGGGAGCTGTAGGGGGCAACACCCTTGGTTGTTGTGTCTGTTGCTGGCAACTTACTGGCAGCCGACAGATTCT              | 4  |
| wt-144660-144780 | 4057 | AATGGCCGCGCTTCTTCTCTGTGTTTAAATAAGAACTCAGCCAGGACTTACCTGAGACTCAAAGTCTGGTCTGGTGTGAGACCCCAAGATTTGTCATGACACCT                 | 4  |
| wt-144780-144900 | 4058 | GCCACCTGTGGTATTGGGTTCTATTCTTAGTGTGAAATTTGTAATAAAATTCATAAAATGCACTAATCTCTTACCTGTTAGGGTATTGGGTAATTGTCGAATTTCTAGCCTGCCTATT   | 4  |
| wt-144900-145020 | 4059 | TTCAAATTTGCCTAAGGTGGCAATTAAGATGTGGTAAATTAACCATTTCTGTCTGACACCCTGCATGGCAACCGGGTCCATGGCATTATAGATAAACAATAGATGCTTGTCT         | 4  |
| wt-145020-145140 | 4060 | TGCTCATGTGCAGAGGAGGGGTGTTGGTGTGCAATATAGTTTCTGGATTCCAATTTGAGTTGGGGGTGCTATTTTCACTATGGAATTAATTAAGTACTGACATTAGACAGTGGACCCGGC | 4  |











|                |      |                                                                                                                                     |   |
|----------------|------|-------------------------------------------------------------------------------------------------------------------------------------|---|
| wt-4770-4890   | 4323 | CGAAGCACTGGCAGTCTCCCCGTTGACAGGAAAGAATCTCAGCCACGCGCGTGGTGACAGAGCCTGACCCACGATGTCAGTGGCCGTGCTATGCGCCCCGGCCACCAGGGCCATGA                | 4 |
| wt-4890-5010   | 4324 | AAGCCTCCTGGCGGCCTTACGAATGCCGGATGCCTGTGCCGACGGGTGTTCTTTCGCGAGGTTAGGACAAACAGTTCCTCGACAAGTACGTTGGCTGGCCATCGGAGGAGTTCATGG               | 4 |
| wt-5010-5130   | 4325 | GGCCAGGGACTCTGCCCTGGCAGGCCGTGCCACCGTGGCGTGATTAATCGTTTCCCCGCCCTGCGTGACGCTATTCTAAAGTTCCTCAACAGGCCAGATACGTTCTCGGTGGCCTGGG              | 4 |
| wt-5130-5250   | 4326 | GGAGCTGGGGGTGCAAGTTTTGGCTGGCCCTGGGGGCGGTGGGGTCAACAGATAATCCACCGCCCTGGCGTGAAGTTAATGTCACAGATACACTCTGATTCTGCGCCCCAACGCCTC               | 4 |
| wt-5250-5370   | 4327 | TGGCATGTTTGAGTCCCGCTGGCTGAACATTTAGCATCCCCGGCCACCCAGCCTGTGATCTGCGTGGCCTCCGGGGTGGCTCTGCCCTGTTGGGTGCAAGGCTCGTGCCTGGGCCT                | 4 |
| wt-5370-5490   | 4328 | GCAATTTACTAACCTCGGGATGCCATGTTTTCAGAAATGCCACACAGCAGTCCGCTCCACTTCCACAGCAATGGCAGGATGCCTGGCGCTTGTCTGAATTAATCCAAAGAACCCAC                | 4 |
| wt-5490-5610   | 4329 | GGAGCAGGGCAACATTGCAGGGCTCTGTTACGCGATGGTCTGTCATCTGGCTCTCCTGTGTACCCTCACTTGTACAGACTTTTGGCAATGGGACACTTCCCCCGCTTGGGCA                    | 4 |
| wt-5610-5730   | 4330 | CCCCACGGGGTCTCCCCCTGGACACTTATGTTTCAAGCAGCTCACCTATGGTCACTCAGGCACGGTCCGCCCTCCGAGTGACCAGTCACTTCCAGACTATGCATACACTGAATTTAGC              | 4 |
| wt-5730-5850   | 4331 | CTGATATTGTCCCCCTAGCCCCGGGCCAGCCCTCTCAGAAAATCTGCATGGAGAAGCTGGAGTGAACCTCCCCCCAGACCTGTGTGCTGATTACAAAACACTACAATAAACCCA                  | 4 |
| wt-5850-5970   | 4332 | ATGTGCAAATGTGGTTGTATGGCTACTTTGTGTTCTAAAAATGCAACAATAGAAGTGAAACCCCTCAGTACCGGACATTAACCTCAACCACAAAATGGGGTGGAGAAAGTAACC                  | 4 |
| wt-5970-6090   | 4333 | ACATATACTGGAGATGATTATGGCTGGGGTCCCCGGACAATACACCCATCTGGAGTTCAACCTAATTACATGGTAGATAAATAAGAGTCCCTCCTCACCCTCGAAACTATGGCAG                 | 4 |
| wt-6090-6210   | 4334 | ACATTTCTAAGATAACGAGGAGAGTAGGTGAGGGCAGGAGCATTGGGCAAGTTGGGCAAGTTCAGACTCTGCTTTCGCCGCTTCGGTCAAGTACCAGCTGGTGGTCCGCATGTTTTGATCCAAACTTTTGT | 4 |
| wt-6210-6330   | 4335 | GGAAGGCAGGCGGGCCTAGCAATGTCACAGCTAAATGCCACCAGGCCACACTCAAGCGGGTCTCGGAGTCTAGGTGACAGACCAGAAAGGTGAGCCTGCAAGGTGGATGGCGTG                  | 4 |
| wt-6330-6450   | 4336 | TTTTCTGAGGTTATCCCCGTACGTGCAGTGTGGGTGATAGACCCCTAGAATGTGTGCAAAATGACCAAGCGTCCCGCAGCGGGCTCCCAACACGGGTCCAGAGAGGGTAAAAGA                  | 4 |
| wt-6450-6570   | 4337 | GGGGGCCATAAAGCCAGGGTGTAAAACACCGACCCGCCACAGATGGCACAGTGGGGGAAATGAGGGTTAGCATAGGCAACCCCGCCTACACACCAACTATAGCAAACCCCGCCCC                 | 4 |
| wt-6570-6690   | 4338 | GTCACGGTGACGTAGTCTGTCTTGGAGAGATGTAGACTTGTAGACTGCAAAAACCTCAGGACCTACGCTGCCCTAGAGGTTTTGCTAGGGAGGAGACGTGTGTGGCTGTAGCCACCCGT             | 4 |
| wt-6690-6810   | 4339 | CCCCGGTACAAGTCCCGGGTGGTGAGGACGGTGTCTGTGGTGTCTTCCAGACTCTGCTTTCGCCGCTTCGGTCAAGTACCAGCTGGTGGTCCGCATGTTTTGATCCAAACTTTTGT                | 4 |
| wt-6810-6930   | 4340 | TTTAGGATTTATGCATCCATTATCCCGCAGTTCCACCTAAACGGGGCTTAACTGTTGCATCCAGAAGATGCACGCTTAAACCCCGCTACAACCGTACGCTAGCTGTTTACCAGCATGTAT            | 4 |
| wt-6930-7050   | 4341 | AGAGTTACGGTTCGCTACATCAAACAGGACAGCCGTTGCCCTAGTGGTTTTCCGACACACCCCAACGCTCAGTGCGGTGCTACCGACCCGAGGTCAAGTCCCGGGGAGGAGAAGAGAGG             | 4 |
| wt-7050-7170   | 4342 | CTTCCCGCTAGAGCAATTTGCAAGTCAGGATTCTTAATCCCTCTGGGAGAAAGGATTTCGGCTTTCGCCCTATTTTTGTGGCTAGTTTTGCACCCACAACATGTAAGGGCCCCGCTAC              | 4 |
| wt-7170-7290   | 4343 | CCCTACAACACAAAACAACTCTCCCCTAACCATCCTTTTGGCAATCAATTCTGTGACAGGGTTCTCGGACCCAGTCTTAGTTACAGTAGACACCCAGTTATGCAGTGCCACCAA                  | 4 |
| wt-7290-7410   | 4344 | TTCCAACGATTTTAAACCTCTGGAACTTCAATTAACCGGATGCAGGAAAGGACAAAGCAGCAAAATTCACGCCCTTGGGAGGTGGGCATATGCAAGGATAGCATCCCA                        | 4 |
| wt-7410-7530   | 4345 | CTCTACTACTGGGTATCATATGCTGACTGTATATGCATGAGGATAGCATATGCTACCCGGATACAGATTAGGATAGCATATACTACCAGATATAGATTAGGATAGCATATGCTACCCAG             | 4 |
| wt-7530-7650   | 4346 | ATATAGATTAGGATAGCCTATGCTACCCAGATATAAATTAGGATAGCATATACTACCAGATATAGATTAGGATAGCATATGCTACCCAGATATAGATTAGGATAGCCTATGCTACCCAG             | 4 |
| wt-7650-7770   | 4347 | ATATAGATTAGGATAGCATATGCTACCCAGATATAGATTAGGATAGCATATGCTATCCAGATATTTGGGTAGTATATGCTACCCAGATATAAATTAGGATAGCATATACTACCCATACT             | 4 |
| wt-7770-7890   | 4348 | CTATTAGGATAGCATATGCTACCCGGATACAGATTAGGATAGCATATACTACCCAGATATAGATTAGGATAGCATATGCTACCCAGATATAGATTAGGATAGCCTATGCTACCCAGATAT            | 4 |
| wt-7890-8010   | 4349 | AAATTAGGATAGCATATACTACCCAGATATAGATTAGGATAGCATATGCTACCCAGATATAGATTAGGATAGCCTATGCTACCCAGATATAGATTAGGATAGCATATGCTATCCAGATAT            | 4 |
| wt-8010-8130   | 4350 | TTGGGTAGTATATGCTACCCATGGCAACATTAGCCACCCGCTGCTCAGCGACCTCGTGAATATGAGGACCAACACCCCTGTGCTTGGCGCTCAGGCGCAAGTGTGTGTAATTTGTCTC              | 4 |
| wt-8130-8250   | 4351 | CAGATCGCAGCAATCGGCCCTATCTTGGCCCGCCACCTACTTATGCAGGTTATCCCGGGGTGCCATTAGTGGTTTTTGGGGCAAGTGGTTTGACCAGTGGTTAGCGGGGTTACA                  | 4 |
| wt-8250-8370   | 4352 | ATCAGCCAAGTATTACACCCTATTTTACAGTCCAAAACCGCAGGGCGCGTGTGGGGCTGACCGCTGCCCCACTCCACAATTTCAAAAAAAGAGTGGCCACTGTCTTTGTTTAT                   | 4 |
| wt-8370-8490   | 4353 | GGGCCCATTTGGCGTGAGGCCCCGTTAATTTTCCGGGGTGTAGAGACAACCAAGTGGAGTCCGCTGTGCGCGTCCACTCTTTCCTTGTACAAAATAGAGTGTAAACAATG                      | 4 |
| wt-8490-8610   | 4354 | TTACCTGTCTTGGTCCCTGCCTGGGACACATTTAATAACCCAGTATCATATTGCCTAGGATTATGTTTGGCCATAGCCATAAATTCGTGTGAGATGGACATCCAGTCTTACCGC                  | 4 |
| wt-8610-8730   | 4355 | TTGTCACCCACCCATGGATTTCTATTGTTAAAGATATTCAGAATGTTTCATTCTACACTAGTATTTATTGCCAAGGGGTTTGTGAGGGTTATATTGGTGTATAGCAATAGCCACCA                | 4 |
| wt-8730-8850   | 4356 | CTGAACCCCGCTCCAAATTTTATTCTGGGGCGTCACTGAAACCTGTTTTCCAGCACCTCACATACACCTTACTGTTCAACACTCAGCAGTTATTCTATTAGCTAAACGAAGGAGAA                | 4 |
| wt-8850-8970   | 4357 | TGAAGAAGCAGGCGAAGATTAGGAGAGTCTACTGCCCGCTCCTTGATCTTACGCACTGCCCTTGTGACTAAAATGGTTCACCTACCCTCGTGAATCCTGACCCCATGTAATAAACCC               | 4 |
| wt-8970-9090   | 4358 | GTGACAGCTCATGGGTGGGAGATATCGCTGTTCCCTTAGGACCCTTTTACTAACCTAATTCGATAGCATATGCTTCCCGTTGGGTAACATATGCTATTGAAATAGGGTTAGTCTGGATA             | 4 |
| wt-9090-9210   | 4359 | GTATATACTACTACCCGGGAAGCATATGCTACCCGTTTAGGGTTAAACAGGGGGCTTATAAACACTATTGCTAATGCCCTTGTAGGGTCCGCTTATCGGTAGCTACACAGGCCCTCT               | 4 |
| wt-9210-9330   | 4360 | GATTGACGTTGGTGTAGCTCCCGTAGCTTCTCCTGGGCCCTGGGAGTACATGTCGCCAGCATTGGTGAAGAGCTTACAGCCCAAGAGTTACACATAAAGGCAATGTTGTGTTGACGTC              | 4 |
| wt-9330-9450   | 4361 | CACAGACTGCAAACTGCTCCAGGATGAAAGCCACTCAGTGTGGCAAAATGTGCATCCATTTATAAGGATGTCAACTACAGTACAGAGAACCCTTGTGTTGGTCCCCCCCCGTGT                  | 4 |
| wt-9450-9570   | 4362 | CACATGTGGAACAGGGCCAGTTGGCAAGTTGTACCAACCAACTGAAGGGATTACATGCACTGCCCGCGGGAAATACGTCCTACCCAGGAACCCGAAACAGTGTTCAGAGAGTGTGTA               | 4 |
| wt-9570-9690   | 4363 | AAAATAGAACGCCCTGGAACCTGCCCACTGTGCAATGCAGCTTTTAGCCATGCCATGCTCTATAAATCACTTCCCTATCTCAGGTAGGCCTGCACACCTTAGGTATGGAGCGAAGGTTAG            | 4 |
| wt-9690-9810   | 4364 | TGGTCACTCTGCAGTGCCTGGTGTCTTTACCTGGCACCTGAGTGTGGAGGTACAGACCAATGTGACAATTTCCCAAATGTTGAGGGACCTAAGAGATGCCTCAGTCTGTTAAAA                  | 4 |
| wt-9810-9930   | 4365 | CCTTTTTCCAGACAAGGACAGGAGTACATAACCTTTTGTCAAGGAGTCTCTGCTACAGAGACTTTAAGGGCTACCTGGATGCCAGGCCCTGTCAAGAAATGATCCAATTTCACTGGAGG             | 4 |
| wt-9930-10050  | 4366 | AAGTCATGCCACAGGCTGAAAACAGGACCCTGAAGCCAAAGACCATGTCAATTTTGGGTGAAAATCTAAGACCCCTACGGCTCCGCCCTGCGCAGGTGCCACAGGTTCTGCCGTGTG               | 4 |
| wt-10170-10290 | 4367 | CAATTAAGCCAGGTGATAATCCATACCCTGGAAGCAGGAGATGGGTGCATTTACCCCAACCCCTTTCGACTGTCAATTAACAATAAATGAAACCTTTTATTCTTGATTGCCTCT                  | 4 |
| wt-10290-10410 | 4368 | TGTGTTCTGCCGCCAGGTACCTTCTGTGTTCTCCCCACGGGAAAAAGAAATAGTCTTGCAGAAAGGCCATTGACGCAAGTTTTGCCGTGGGGATTACCCGACCCAGCCACTTACAGC               | 4 |
| wt-10410-10530 | 4369 | ACATTTTGTCTAGTCCATCTTAGGAGCCCGGGCCAGCATTCTATCAGCTTAACGGGAAGAGAAGTGGGGAGGGCACTGCCCACTAACCTTAACCACTGACGCTACAAAAGTACACT                | 4 |
| wt-10530-10650 | 4370 | AGCTGTTTCTCTATTCCCACTAGAGACGCCAAGATGCAAACTACAGCCCGGGCCAGCCCTTGCAGGGCAGACGTTAGGCTGACAAGGGGAGCAAGTGGCAGTGGGGGGAA                      | 4 |
| wt-10650-10770 | 4371 | GGGGCACAAAGATGCCGGCCGAACTGGACCACGGTCCACCCCGCTCAAGCGTCCGGAGCCGGCGGCTCGGCTAAGGAGGGCGGCTTGCAGCAATTTATTAGTAGCTACCAACAAG                 | 4 |
| wt-10770-10890 | 4372 | GGCCCCAGATGCCCCACCAGTCCACCGCCGTGTCACCTACATATTCACCTTATTTTAAATAATGTGCCCAATTAGAAACCAAGCGCAGAAATAGTTGAGAGGCTAGTG                        | 4 |
| wt-10890-11010 | 4373 | TTTTAAACATGCACCCCTAGGCCAGCCAGAGATAATGTCAAGATTATCAAGTTGGTGAACACGCCGTTGGGAAAAAATTTATGGTTCAAGTGCCTGCTATCTTGAACAGTAG                    | 4 |

|                |      |                                                                                                                                    |    |
|----------------|------|------------------------------------------------------------------------------------------------------------------------------------|----|
| wt-11010-11130 | 4374 | AAAATGAACCTTGTGGCGGGAGAAGGAATAACGCCTTATCTGGGAGGAGCGAGGATTATAGCCAATAAGAGAGCTCAAGACGAGGGCTCGAAAGATAGTGGCCCCGTGGGACCT                 | 4  |
| wt-11130-11250 | 4375 | TAGAGGTGGAGCAACGTCTAAAGTGGTAATAACACCAGGCGGGGCTGGGCAAAGGGTCCACGGCGGGATTAAATACGCTTGCTTACGCAAGCTCAGTTAATTCGCCACGACTTGA                | 4  |
| wt-11250-11370 | 4376 | AAAATGTAGCCCTTAACCAATTGGCGGCCCTAAGGGGGGACTAAGTCCCACTACAAAACTCTGTGTCTGCTGCAAATTTAGATCAGATGGCATAGAGACAAGGACACCGAAGAC                 | 4  |
| wt-11370-11490 | 4377 | CCCCAGAGCCCTCATCGCAGGGTCTTACCATGCGGCCATGTAGGCCCACTTAACACTACAGACCTACGCTCTCCATTATCATGTAAACCACAAATCATCTAAACCGTAAGTCTAAG               | 4  |
| wt-11490-11610 | 4378 | GGCCTCTGAGGTTTTCTCAGGAGGCCCTAATGTATAATTAATCATGCATTTGATTTAAAAAAGTAGGTTACACTCATTATAGGCCAGACTTTATTTGCAGATTAATAATTTATGTGAT             | 4  |
| wt-11610-11730 | 4379 | TCTCCTCCCTTAGGACTGAAGAACCCCTCTGCACGTGACATGTATGAAATAATTTATGTCATAAGTGAATGATTAGAAAGTCAATAAACCCACTCCCTTTACATGAATC                      | 4  |
| wt-11730-11850 | 4380 | TGGGACTGAATTTTGGGGTACTCTAAAGACTCAACGGTTCAGATTTCCGGGTCTCCCTTTTATAAAGTGTGAACAGTGATTTCAGTAAAACTAAGAGATAATTTGGTGTCACTT                 | 4  |
| wt-11850-11970 | 4381 | CCGCATTTTAAAGTTTCAGAAAAATTTAAATTTAAATTTGAAATTTCTCTCAAAAATAATCCAATGAAAACTCAAAGAATCTTATGTATGTAATTTTGGCCCCAACTGGGCTTCAGA              | 4  |
| wt-11970-12090 | 4382 | TGCCTTCTATTGCACTCTCAAAAAACATCTGGACACATGTGCCAGACGCTGGGCTCTAAGGCCCTCGGGTCCCTGGACCCGGCCCTCAGCAACCCCTGCTGCTCCCTCCTGCCA                 | 4  |
| wt-12090-12210 | 4383 | CCCCAGCTCCCCCTCCCCCTCCCTCTCGCTCTGTCTCCTCCCCGGTCCCAGTAGAGGGCCCTGCCCCCTGCACCCAGTACCTGCCCTCTTGGCCACGCACCCCGGGCCAGGC                   | 12 |
| wt-12210-12330 | 4384 | CACCTAGACCCTGGCAAGCCCATCCCTGAAGACCCAGCGCCATTCTCTGTGAACGAGCAGAGAAGAAGTAGAGGCCCGGCCATTGGGCCAGATTGAGAGACCAGTCCAGGGG                   | 4  |
| wt-12330-12450 | 4385 | CCCGAGTTGGAGCCAGCGGCCACCCGAGTCCAGCCAGCACCCTCGCTCCGGGCTCCCTCGGGCTGGCAGAGACAGGACCCCGGCCAGCTGGCCCGGAGGCGCCGGAGTGGGCCGGTCCGGC          | 12 |
| wt-12450-12570 | 4386 | TGGGCTGGCCAGCCGGGTCTGGGAGTCTGGGTGGCGAGCCTGCTGCTCAGGAGGGCCCTGGCTCCGCCGGTGGCCCTGGGGTAAAGTCTGGGAGGCAGAGGGTCCGGCTAGGCC                 | 8  |
| wt-12570-12690 | 4387 | GGGAAAGTGGAGGGGATCGCCCGGTCTCTGTTGGCAGAGTCCGGCGATCCTCTGAGACCTCCGGGCCGGAGGGTCCGCTCAGCCCCAGACAGACCCAGGGTCTCCAGGCAG                    | 8  |
| wt-12690-12810 | 4388 | GGTCCGGCATCTCAGGGCAGCAGGCTACCACCACAGGCCCCAGACCCGGTCTCGGCCAGCCAGCCGACCGGCCCGCGCTGCCCTCTCTGGGCCAGCCCGGGGTTGG                         | 12 |
| wt-12810-12930 | 4389 | TTCTGCCCTCTCTGTCTTTCAGAGGAACAGGACCTCGGGCACCCAGAGCCCTCGGGCCCGCTCCAGGCCTCTCGGTCTCCGCTCCCTCTGAGCCCCGTTAAACCCAAA                       | 8  |
| wt-12930-13050 | 4390 | GAATGTCTGAGGGAGCCACCCTCGGGCCAGGCCAGAGTCCAGAGTCCAGGGTCCCGGGCCAGCTCTCCCTTTTATAAAGTGTGAACAGTGATTTCAGTAAAACTAAGAGATAATTTGGTGTCACTT     | 12 |
| wt-13050-13170 | 4391 | CAGAGGCCGGTCTCGCCCTTCCCGGGCTTCAGAGCCAGGATGCCCCAGAAGGGACCTAGGCGTCCCTCTCTCCCTCCAGGCCCGAGCCTCTCCCTCGCGGAGAGGGGCC                      | 8  |
| wt-13170-13290 | 4392 | TCTTTGGGCCCTCAAGTCCAGCCCACCGAGACCCGAGTGGCCGGATCCCCCACCGCCCTTCTCTGTCCCTGCTCTCTCAAACCTTGGCTCCACCTAGACCCAGCTTCTG                      | 8  |
| wt-13290-13410 | 4393 | GCCTCCCGGGTCCACAGGCCAGCCGAGGGGACCCGGCAGCCCGGGCAGTCCGCTTCCCTCTCCCTGGCTCTCTCCCGCTCCACCCAGGCCCCCTCAGCTTGCCTCCCCAC                     | 12 |
| wt-13410-13530 | 4394 | CGGGTCCATCAGGCCGGCCGAGGACCCCGGGCCGGTGTGAGTCCCGCTGACGCCCGCCAGTCTGCTCCAGGCAAGGGCCAGCTTTTCTCCCCAGCCTGAGGCCAGT                         | 8  |
| wt-13530-13650 | 4395 | CTCCTGTGCAGTGTCTGTAAGTCCAGCTCCACGCCCTCGAGGGTCCCGGGCCAGCTCTGCCACCCCTCCACCGGTGGACAGGCCCTCTGCCACCCTCCCGGCTCCCGCCCT                    | 8  |
| wt-13650-13770 | 4396 | CCTGTGTCCACCCAGTCCCGTCCAGGGGGACTTTATGTGACCCTTGGGCTGGCTCCCCATAGACTCCCATGTAAGCCTGCCTCGAGTAGTGCCTCCAGAGCCCTTTTGGCCCCCT                | 4  |
| wt-13770-13890 | 4397 | GGCGGCCAGCCGACCCCGGGCCGCCCAAACCTTTGTCCAGATGTCCAGGGTCCCGAGGGTAGGCCCAGCCCTCCCGCCCTGTCCACTGCCCGGTCCCGCCAGAAGCCCC                      | 12 |
| wt-13890-14010 | 4398 | AAAAGTAGAGGCTCAGGCCATGCGCGCCCTGTACCAGGCCCTGCCAAAGAGCCAGATCTAAGGCCGGGAGAGGACGCCCAAAGCGGGTGCAGTAACAGGTAATCTCTGGTAGTGATTG             | 4  |
| wt-14010-14130 | 4399 | GACCCGAAATCTGACACTTTAGAGCTTGGAGGACTTAAACTCTAAAACTAAAACTTTAGAGGCCAATGGGCGCCATTTTGTCCCAAGCGCCGATAATGGCGGACCTAGGCCATAA                | 4  |
| wt-14130-14250 | 4400 | ACCCCGAGGAAGCGGGTCTATGGTGGCTCGCTGCTGATCTTTAGAGGGGAAAAGGAATAAGCCCCAGACAGGGGAGTGGCTTGTGTTGACTTCACAAAGTCCAGGGCCA                      | 4  |
| wt-14250-14370 | 4401 | AGGGGGTTCGCGTTGCTAGGCCACTTCTCAGTCCAGCCGCTTACGTCCAGCCGCTTACGTAAAGCCAGACAGACCCAAATGTCAAGTCTAGGGAGGGGAGCCACTGCCCTGGTATAAAGTGGTCTGCAGC | 4  |
| wt-14370-14490 | 4402 | TATTTCTGGTGCATCAGAGCGCCAGGAGTCCACACAATGTAAGAGGGGTCTTCTACCTCTCCCTAGCCCTCCGCCCTCCAAGGACTCGGGCCAGTTTCTAACTTTTCCCTTCC                  | 4  |
| wt-14490-14610 | 4403 | CTCCCTCGTCTTGCCTGCGCCGGGGCCACCTTATCACCCTGCGTGACTCCGCCATCAAAGCCTAGGGGAGACCAGTGAAGGCCCTGGACCAACCCGGCCCGGGCCCGGTTATC                  | 8  |
| wt-14610-14730 | 4404 | GGGCCAGAGGTAAGTGACTTTAATTTTTCTGCTAAGCCCAACACTCCACCACCCAGGCACACACTACACACCCACCCGCTCTCAGGGTCCCTCGGACAGCTCTAAGAAGGCAC                  | 4  |
| wt-14730-14850 | 4405 | CGTTCGCCAGTCTACCAGAGGGGCCAAGAACCAGACGAGTCCGTAGAAGGTCCTCGTCCAGCAAGAAGAGGAGTGGTAAGCGGTTACCTTCAGGGTAAAGTAACTGACCTCT                   | 4  |
| wt-14850-14970 | 4406 | CCAGGGCTCACATAAAGGGAGGCTTAGTATACATGCTTCTGCTTTTACAGGAACCTGGGGGCTAGTCTGGTGGGATTAGGCTGCCTCAAGTTGCATCAGCCAGGGCTTATGCCCTC               | 4  |
| wt-14970-15090 | 4407 | CTCAGTTCCTAGTCCCGGGCTTCAGGCCCTCCGTCGCCCTCCAGAGACCCGGGCTTCAGGCCCTGCTCTCTGTTACCTTTTAGAACCACAGCCTGGACACATGTGCCAGA                     | 4  |
| wt-15090-15210 | 4408 | CGCCTTGGCTCTAAGGCCCTCGGGTCCCGCTGGACCCGGCCCTCAGCAACCTGCTGCTCCCTCTGTCACCCAGCCTCCCGCCCTCCCGTCCCGCTTCGCTCTGATCTCCCCC                   | 8  |
| wt-15210-15330 | 4409 | GGTCCCAAGTAGGGCCGCTGCCCTTGCACCCAGTACCTGCCCTCTTGGCCACGCACCCCGGGCCAGGCCACCTTAGACCCGGCCAAAGCCCATCCCTGAAGCCAGCGGCCATTC                 | 8  |
| wt-15330-15450 | 4410 | TCTCTGGTAACGAGCAGAGAAGTAGAGGCCCGGGCCATTGGGCCAGATTGAGAGACCAGTCCAGGGCCCGAGGTTGGAGCCAGCGGCCACCCAGGTTCCAGCACCCGGTCCCT                  | 8  |
| wt-15450-15570 | 4411 | CCGGGGGACAGAGACAGGACAGGGCCCGCCCGGAGCTGGCCCGAGGAGGCGCCCGAGTGGGGCCGCTCGGCTGGGCTGGCCGAGCCCGGGTCTGGGAGTCTGGGTGGCGAGCCTGCT              | 12 |
| wt-15570-15690 | 4412 | GTCTCAGGAGGGGCTGGCTCCGCCGGTGGCCCTGGGGTAAAGTCTGGGAGGCAGAGGGTCCGGCTAGGCCCGGGAAAGTGGAGGGGATCGCCCGGGTCTGTTGGCAGAGTCCGGGC               | 8  |
| wt-15690-15810 | 4413 | GATCCTCTGAGACCTCCGGGCCGGAGGTCGCCCTCAGCCCCAGACAGACCCAGGGTCTCCAGGCAGGGTCCGGCATCTCAGGGGACAGAGGCTCACCACCACAGGCCCCCGAG                  | 8  |
| wt-15810-15930 | 4414 | ACCCGGGTCTCGGCCAGCCGAGCCGACCCGGCCCGCGCTGCGCCTCTCCGGGCCAGCCCGCGGGTGGTCTGCCCTCTCTGTCTTCCAGAGAACCCAGGGACCTCGGGCACC                    | 8  |
| wt-15930-16050 | 4415 | CCAGAGCCCTCGGGCCCGCTCAGCCGCGCTCTGGTCTCCGCTCCCTCTGAGCCCGTTAAACCCAAAGAAATGTCTGAGGGGAGCCACCTCGGGGCCAGGCCCCAGAGTCCAGA                  | 8  |
| wt-16050-16170 | 4416 | GGTACAGGGCACCTCAGGGTGCCTCCCGGGTCCAGGCCAGCCGGAGGGACCCCGGAGCCCGGGCCAGAGCCGTTCTCGCCCTTCCCGGGCTTCAGAGCCCAAGGATG                        | 12 |
| wt-16170-16290 | 4417 | CCCCAGAAGGGACCTAGGCGTCCCTCTCCTCCCTCCAGGCCCGAGCCTCTCCCTCGCGGAGAGGGCCCTTTGGGCCCTCAAGTCCAGCCCAAGGAGACCCAGTGGCCCGGAT                   | 8  |
| wt-16290-16410 | 4418 | CCCCCACCGGCCCTTCTCTGTCCCTGCTCTCTCAAACCTTGCCTCACCTAGACCCAGCTTCTGGCTCCCGGGTCCACAGGCCAGCCGGAGGACCCCGCAGCCCGGG                         | 8  |
| wt-16410-16530 | 4419 | CGAGTTCGCTTCCCTCTCCCTGGCTCTCTCCCGCTCCACCCAGCCCGCTCAGCTTGCCTCCCAAGCCGGTCCATAGGCCGGCCGAGGAGACCCCGGCCCGGGTGTGAGT                      | 8  |
| wt-16530-16650 | 4420 | CCCCCTGCAGCCGCCAGTCTCTGCTCCAGGCAAGGGCCAGCTTTTCTCCCCAGCCTGAGGCCAGCTCTCTGTCAGTGTCTGTAAGTCCAGCCTCCACGCCCTCCAGCCGTCACCGC               | 8  |
| wt-16650-16770 | 4421 | TCCCGGCCAGCTCTGCCACCTCCACCGTGCAGGCCAGCCCGGAGGGACCCCGGAGCCCTGTGCCACCCAGCCGCTCCCGTCCAGGGGGACTTTATGTACCTTTG                           | 8  |
| wt-16770-16890 | 4422 | GGCCTGGCTCCCATAGACTCCCATGTAAGCTGCTCCAGTGTGCTCCAGAGCCCTTTCCCGCCCTGGCGGCCAGCCCGACCCCGGGCCGCCCAAACCTTTGTCAGATGTC                      | 8  |
| wt-16890-17010 | 4423 | CAGGGTCCCGAGGGTGAAGCCAGCCCTCCCGCCCTGTCCACTGCCCGGTCCCGCAGAAGGCCCAAAAGTAGAGGCTCAGGCCATGCGCGCCCTGTACCAGGCTGCCAAA                      | 8  |
| wt-17010-17130 | 4424 | GAGCCAGATCTAAGGCCGGAGAGGCAGCCCAAAGCGGGTGCAGTAACAGGTAATCTCTGGTAGTGATTGGACCCGAAATCTGACACTTTAGAGCTCTGAGGACTTAAACTCTAA                 | 4  |



|                |      |                                                                                                                                  |    |
|----------------|------|----------------------------------------------------------------------------------------------------------------------------------|----|
| wt-17130-17250 | 4425 | AAATCAAACCTTTAGAGGCGAATGGGCGCCATTTGTCCCCAGCGCGGCATAATGGCGGACCTAGGCCTAAACCCCGAGGAAGCGGGTCTATGGTTGGCTGCGCTGCTGCTATCTTTAG           | 4  |
| wt-17250-17370 | 4426 | AGGGGAAAAGAGGAATAAGCCCCAGACAGGGGAGTGGGCTTGTGTGACTTACCAAAGGTACAGGGCCAAAGGGGTTGCGGTTGCTAGGCCACCTTCTCAGTCCAGCGGTTTACGT              | 4  |
| wt-17370-17490 | 4427 | AAGCCAGACAGCAGCCAATTGTGCTTCTAGGGAGGGGACCCTGCCCTGGTATAAAGTGGTCTGCAGCTATTTCTGGTCCGATCAGAGCGCCAGGAGTCCACACAAATGTAAGAGG              | 4  |
| wt-17610-17730 | 4429 | ACTCCGCCATCCAAGCCTAGGGGAGACCAGAGTGAAGGCCCTGGACCAACCCCGCCCGGGCCCGCGTATCGGGCCAGAGGTAAGTGGACTTAATTTTTCTGTAAAGCCCAACTC               | 4  |
| wt-17730-17850 | 4430 | CACCACCCAGGCACACACTACACACCCACCCCGTCTCAGGGTCCCTCCGGACAGCTCCTAAGAAGCGACCCGGTCCGCCAGTCTACCAGAGGGGGCCAAAGAACCCAGACGAGTCCGT           | 4  |
| wt-17850-17970 | 4431 | AGAAGGTCTCTGTCAGCAAGAAGAGGAGTGGTAAAGGCTTACCTTCCAGGGTAAAGTAACTGACCTCAGCCTCCAGGCTACATAAAGGAGGCTTAGTATACATGCTTCTGCTTTTC             | 4  |
| wt-17970-18090 | 4432 | ACAGGAACCTGGGGGCTAGTCTGGGTGGGATTAGGCTGCCTCAAGTTGCATCAGCCAGGGGTTTCATGCCCTCCCTCAGTTCCCTAGTCCCGGGCTTCCAGCCCTCCCGCTCC                | 4  |
| wt-18210-18330 | 4434 | AACCTGCTGCTCCCTCCTGCCACCCAGCCTCCCGCCCTCCCGTCCCGCTTCCGCTCCTGATCCTCCCGGGTCCCGAGTAGGGCCGCTGCCCGCTGCACCCAGTACCTGCCCTC                | 8  |
| wt-18330-18450 | 4435 | TTGGCCACGCACCCCGGGCCAGGCCACTTAGACCCGGCCAAAGCCCATCCCTGAAGACCCAGCGGCCATTCTCTGGTAAAGAGCAGAGAAGAAGTAGAGGCCCGCGGCCATTGGGCC            | 8  |
| wt-18450-18570 | 4436 | CAGATTGAGAGACCAAGTCCAGGGCCCGGAGTTGGAGCCAGCGGCCACCCAGGTCCAGACCCCGGTCCCTCCGGGGGGCAGAGACAGGCAGGGCCCCCGGCAGCTGGCCCCGAGGAG            | 8  |
| wt-18570-18690 | 4437 | GCGCCCGAGTGGGGCCGGTGGCTGGCTGGCCGAGCCCGGCTGGGAGTCTGGGTGGCAGCCTGCTGCTCAGGAGGGGCTGGCTCCCGGGTGGCCCTGGGTAAGTCTGG                      | 12 |
| wt-18690-18810 | 4438 | GAGGCAGAGGGTCCGCCTAGGCCAGGGGCTTTGGGCCCTCAAGTCCAGCCCAAGGAGTCCCGGCTCTGTGGCAGAGTCCGGCCGATCCTCTGAGACCTCCGGGCCGGACGGTCCGCCCTCAGCCCCAG | 8  |
| wt-18810-18930 | 4439 | ACAGACCCAGGGTCTCCAGGCAGGGTCCGGCATCTTACAGGGCAGCAGGCTACCACACAGGCCCCAGACCCGGGTCTCGGCCAGCCAGCCGACCCGGCCCGCCCTGGCCCTC                 | 8  |
| wt-18930-19050 | 4440 | CTCGGGCCAGCCCGGGGGTGGTTCTGCCCTCTCTGTCTTCCAGAGAACAGGACCTCGGGCACCAGAGCCCTCGGGCCCGCTCCAGGGCCCTCTGGTCTCCGCTCC                        | 8  |
| wt-19050-19170 | 4441 | CCTCTGAGCCCGTAAACCCAAAGAATGTCTGAGGGAGGCCACCTCGGGGCCAGGCCCCAGAGTCCAGAGGTCCAGGGGACCTCAGGGTGCCTCCCGGGTCCAGGCCAGCCGGAG               | 8  |
| wt-19170-19290 | 4442 | GGACCCCGCAGCCCGGGGGCCAGAGGCCGGTTCCTCGCCCTTCCCGGGTTCAGAGCCAGGATGTCCCCAGAAAGGACCTAGGCGTCCCTCTCTCCCTCCAGGCCCA                       | 8  |
| wt-19290-19410 | 4443 | GCCTCTCCCTCGCGAGAGGGGCTCTTTGGGCCCTCAAGTCCAGCCCAAGGAGTCCCGGCTCTGTGGCAGAGTCCGGCCGATCCTCTGAGACCTCCGGGCCGGACGGTCCGCCCTCAGCCCCAG      | 8  |
| wt-19410-19530 | 4444 | CTCCACCTAGACCCAGCTTCTGGCTCCCGGGTCCACAGGCCAGCCGAGGGACCCGGCAGCCCGGGCAGTCCGCTTCCCTCTCCCTGGCCTCTCTTCCCGCTCCACCCG                     | 8  |
| wt-19530-19650 | 4445 | AGCCCTCAGCTTGCCTCCACCCGGGTCCATCAGGCCGGCCGAGGGACCCGGCGGCCGGTGTGCTCAGTCCCGCTGCAGCCGCCAGTCTCTGCTCCAGGCAAGGGCCAGCTTT                 | 8  |
| wt-19650-19770 | 4446 | TCTCCCCCAGCCTGAGGCCAGTCTCCTGTGCACTGTCTGTAAGTCCAGCCTCCACGCCCTCCAGGGTCCCGGGCCAGCCTCGTCCACCCCTCCACAGGTTGACAGGCCCTCT                 | 8  |
| wt-19770-19890 | 4447 | GTCCACCCGGCCATCCCGCCCCCTGTGTCCACCCAGTCCCGTCCAGGGGGGACTTTATGTGACCTTGGGCTGGCTCCCATAGACTCCCATGTAAGCTGCCTCGAGTAGGTGC                 | 8  |
| wt-19890-20010 | 4448 | CTCCAGACCCCTTTTGGCCCTGGCGGCCAGCCGACCCCGGGGCCCCCAAACTTTGTCCAGATGTCCAGGGTCCCGAGGGTGGCCCGAGCCCTCCCGCCCTGTCACCT                      | 8  |
| wt-20010-20130 | 4449 | GCCCCGGTCCCCCAGAACCCCAAAAGTAGAGGCTCAGGCCATGCGCGCCTGTACCAGGCTGCCAAAGAGCCAGATCTAAGCCGGGAGAGGCAGCCCCAAAGCGGGTGCAGTAA                | 8  |
| wt-20130-20250 | 4450 | CAGGTAATCTCTGGTAGTGATTTGGACCCGAAATCTGACACTTTAGAGCTCTGGAGGACTTTAAAACCTAAAACTAAAACTTTAGAGGCGAATGGGCGCATTGTGCCACGCGG                | 4  |
| wt-20250-20370 | 4451 | CATAATGGCGACCTAGGCCTAAACCCCAAGGAAGCGGGTCTATGGTTGGCTGCCTGCTGCTATCTTTAGAGGGGAAAGAGGAATAAGCCCCAGACAGGGGAGTGGGCTTGTGTTGT             | 4  |
| wt-20370-20490 | 4452 | GACTTCACCAAAGTTCAGGGCCCAAGGGGTTGCGGTTGCTAGGCCACCTTCTCAGTCCAGCGGTTTACGTAAGCCAGACAGCAGCCAAATTGTCAGTTCTAGGGAGGGGGACCACTGCC          | 4  |
| wt-20490-20610 | 4453 | CCTGGTATAAAGTGGTCTGCAGCTATTTCTGGTGCATCAGAGCCAGGAGTCCACACAAATGTAAGAGGGGTTCTTACCTCTCCCTAGCCCTCCGCGCCCTCAAGGACTCGGGC                | 4  |
| wt-20610-20730 | 4454 | CCAGTTTCTAATTTTTCCCTTCCCTCCCTCGCTTGGCCCTCGCCCGGGCCACCTTCAACCTCGCTGACTCCCAAGCCTAGGGGAGACCCAAAGTGAAGCCCTGGACCA                     | 4  |
| wt-20730-20850 | 4455 | ACCCGGCCCGGGCCCCCGGTATCGGGCCAGAGGTAAGTGGACTTTAATTTTTTCTGCTAAGCCCAACTCCACCACCCAGGCACACACTACACACCCACCCGCTCAGGGTCCC                 | 4  |
| wt-20850-20970 | 4456 | CTCGGACAGCTCCTAAGAAGGCACCGGTGCGCCAGTCTACCAGAGGGGGCCAAAGACCCAGAGGAGTCCGTAGAAGGGTCTCGTCCAGCAAGAAGAGGAGGTGGTAAGCGGTTACCT            | 4  |
| wt-20970-21090 | 4457 | TCAGGGGTAAGTAACCTGACCTCCTCAGGGTCCACATAAAGGGAGGCTTAGTATACATGCTTCTGCTTTTACAGGAACCTGGGGGCTAGTCTGGTGGGATTAGGCTGCCTCAAGTTG            | 4  |
| wt-21090-21210 | 4458 | CATCAGCCAGGGCTCATGCCCTCCTCAGTTCCTAGTCCCGGGCTCAGGCCCTCCGTCGCCGCTCCAGACCCGGGCTTCCAGCCCTGCTCTCCTGTTACCTTTTAAAC                      | 4  |
| wt-21210-21330 | 4459 | CACAGCCTGGACACATGTGCCAGACGCTTGGCCCTAAGGCCCTCGGGTCCCGCTGACCCCGGCCCTCAGAACCCCTGCTGCTCCCTCCTGCCACCCAGCCTCCCGCCCTCCCGCTC             | 8  |
| wt-21330-21450 | 4460 | CCCCTTCCCTGATCCTCCCGGGTCCCGAGTAGGGCCGCTGCCCGCTGCACCCAGTACCTGCCCTTGTGGCCAGCACCCCGGGCCAGGCCACCTTAGACCCGGCCAAAGCCCA                 | 8  |
| wt-21450-21570 | 4461 | TCCCTGAAGACCCAGCGGCCATTCTCTGTGTAACGAGCAGAGAAGAAGTAGAGGCCCGGGCCATTGGGCCAGATTGAGAGACCAGTCCAGGGGCCGAGGTTGGAGCCAGCGGGCAC             | 4  |
| wt-21570-21690 | 4462 | CCGAGGTCCAGCACCCGGTCCCTCCGGGGGAGAGACAGGCAGGGCCCCCGGCAGCTGGCCCCAGAGAGGCGCCCGAGTGGGGCCGGTCCGGTGGGCTGGCCAGCCCGGGTCTGG               | 12 |
| wt-21690-21810 | 4463 | GAGGTCTGGGGTGGCAGCCTGCTGTCTCAGGAGGGGCTGGCTCCCGGGTGGCCCTGGGTAAGTCTGGGAGGCAGAGGTCGGCTAGGCCCGGGAAAGTGGAGGGGGATCGCCCG                | 8  |
| wt-21810-21930 | 4464 | GGTCTCTGTTGGCAGAGTCCGGGCGATCCTCTGAGACCTCCGGGCCCGGACGGTCCCGCTCAGCCCCAGACAGACCCAGGGTCTCCAGGCAGGGTCCGGCATCTTACGGGGCAGCA             | 8  |
| wt-21930-22050 | 4465 | GGCTACCACCACAGGCCCCAGACCCGGGTCTCGGCCAGCCAGCCGACCCGGCCCGCCGCTGGCGCTCCTCGGGCCAGCCCGCGGGTGGTTCTGCCCTCTCTGTGCTTCA                    | 12 |
| wt-22050-22170 | 4466 | GAGGAACCAGGACCTCGGGCACCCAGAGCCCTCGGGCCGCTCCAGGGCCCTCTGGTCTCCGCTCCCTCTGAGCCCGTTAAACCCAAAGAATGTCTGAGGGAGGCCACCTC                   | 8  |
| wt-22170-22290 | 4467 | GGGGCCAGGCCCCAGAGTCCAGAGGTCCAGGGGACCTCAGGGTGCCTCCCGGGTCCAGGCCAGCCGGAAGGACCCCGGAGCCCGGGCCAGCCAGGCCGGTCTCTGCCCTTC                  | 12 |
| wt-22290-22410 | 4468 | CCCGGGTTCAGAGCCAGGATGTCCCCAGAAGGGACCTAGGCGTCCCTCTCTCCCTCCAGGCCGAGCCTCCTCCGCGGAGAGGGGCTCTTTGGGCCCTCAAGTCCAGCCC                    | 8  |
| wt-22410-22530 | 4469 | CACCGAGCCCGAGTGGCCGGATCCCCACCCAGGGCCCTCTCTGTCGCCCTGCTCCTCAACCTTCGCTCCACCCAGACCCAGCTTCTGGCCCTCCCGGGTCCAGCCAGCCAG                  | 8  |
| wt-22530-22650 | 4470 | CCGGAGGACCCCGCAGCCCGGGCAGTCCGCTTCCCTCTCCCTGGCCTCTCTTCCCGCTCCACCCAGCCCTCAGCTTGCCTCCACCCGGGTCATCAGCCCGCCGGAGG                      | 12 |
| wt-22650-22770 | 4471 | GACCCCGCGCCCGGTGTAGTCCCGCTGCAGCCGCCAGTCTGCTCCTCAGGCAAGGGCCAGCTTTTCTCCCGCAGCCTGAGGCCAGTCTCTGTGCACTGTCTGTAAGTCT                    | 8  |
| wt-22770-22890 | 4472 | CAGCCTCCACGCCCTCCACGGCTCCCGGGCCAGCCTCGTCCACCCCTCCCGCAGGTTGACAGGCCCTCTGTCCACCCGGGCAATCCCGCCCGCTGTGTCCACCCAGTCCCGTCC               | 12 |
| wt-22890-23010 | 4473 | AGGGGGGACTTTATGTGACCTTGGGCGTGGGCTCCCATAGACTCCATGTAAGCCTGCCTCGAGTAGGTGCTCCAGAGCCCTTTTGGCCCTGCGGGCCAGCCCGCCCGGGC                   | 8  |
| wt-23010-23130 | 4474 | GCCCCAAACTTTGTCCAGATGTCCAGGGTCCCGAGGGTGGCCAGCCAGCCCTCCCGCTGCTCCTCAGCTCCCGGGTCCCGCCAGAACCCCAAGTAGAGCTCAGCCATGCG                   | 8  |
| wt-23130-23250 | 4475 | CGCCCTGTACACAGCCTGCCAAAGAGCCAGATCTAAGCCCGGAGAGGACGCCCAAGCCGGTGCAGTAAAGGTAATCTCTGGTGTGATTGGACCCGAAATCTGACACTTTAGAG                | 4  |
| wt-23250-23370 | 4476 | CTCTGGAGGACTTTAAACTCTAAAACTAAAACTTTAGAGGCGAATGGGCGCCATTTGTCCCGCAGCGGCATAATGGCGGACCTAGGCCTAAACCCCGAGGAAGCGGGTCTATGGT              | 4  |
| wt-23370-23490 | 4477 | TGGCTGCGCTGCTATCTTTAGAGGGGAAAGAGGAATAAGCCCCAGACAGGGGAGTGGGCTTGTGTTGACTTACCAAAGGTACAGGGCCAAAGGGGTTGCGGTTGCTAGGCCAC                | 4  |

|                |      |                                                                                                                         |    |
|----------------|------|-------------------------------------------------------------------------------------------------------------------------|----|
| wt-23490-23610 | 4478 | CTTCTCAGTCCAGCGCTTTACGTAAGCCAGACAGCAGCCAATTGTCACTTCTAGGGAGGGGACCCTGCCCTGGTATAAAGTGGTCTGCAGCTATTTCTGGTGCATCAGAGCGCC      | 4  |
| wt-23610-23730 | 4479 | AGGAGTCCACACAAATGTAAGAGGGGCTTCTACCTCTCCCTAGCCCTCGCCCCCTCAAAGGACTCGGGCCAGTTTTCTAACTTTTCCCTTCCCTCGTCTTGCCTGCGCCCG         | 4  |
| wt-23850-23970 | 4481 | TTTTTCTGCTAAGCCCAACACTCCACCACCCAGGCACACACTACACACCCACCCTGTCCAGGGTCCCTCGGACAGCTCTAAGAAGGCACCCGGTCCGGCAGTCTACCAGAGGG       | 4  |
| wt-23970-24090 | 4482 | GGCCAAGAACCAGACGAGTCCGTAGAAAGGGTCTCGTCAGCAAGAAAGAGGAGTGGTAAAGCGTTTCACTTTCAGGGGTAAGTAACCTGACCTCTCCAGGGCTCACATAAAGGGAGGCT | 4  |
| wt-24090-24210 | 4483 | TAGTATACATGCTTCTTGCTTTTACAGGAACTGGGGGCTAGTCTGGGTGGGATTAGGTCGCCCTCAAGTTGCATCAGCCAGGGCTTTCATGCCCTCCCTAGTCCCTCCGGGCTT      | 4  |
| wt-24330-24450 | 4485 | GTCCCCTGGACCCCGCCCTCAGCAACCTGTCTCCCTCTGACCCACCCAGCTCCCCCTCCCGTCCCTTGCCTGTATCTCCCGGTCGCCAGTAGGGCCCGCTGCC                 | 12 |
| wt-24570-24690 | 4487 | GTAGAGGCCCGCGCCATTGGCCCAAGATTGAGAGACCACTGACCCAGGCGGAGTGTGAGGGAGCCACCCCGGGCCAGGTCACAGCACCCCGGTCACCGCTCCGCGGGGAGGGG       | 8  |
| wt-24690-24810 | 4488 | CCCCCGCAGCTGCCCGGAGGAGGCGCCGAGTGGGGCGGTGGCTGGGCTGGCCAGCCCGGCTGGGAGTGTGGGTGGCGAGCTGTCTCAGGAGGGGCTGGTCCCG                 | 12 |
| wt-24810-24930 | 4489 | CGGGTGGCCCTGGGGTAAGTCTGGGAGGAGAGGGTCGGCTAGGCCCGGGGAGTGGAGGGGATCGCCCGGGTCTGTGGTGGCAGAGTCCGGGGATCCTGTGAGACCCTCGGGGCC      | 8  |
| wt-24930-25050 | 4490 | GGACGTCGCCCTCAGCCCCCAGACAGACCCAGGGTCTCCAGGACAGGTCGCGCATCTTCAGGGGACAGAGGCTCACACCACAGGCCCCAGACCCGGTCTCGGCCAGCCGAGCC       | 8  |
| wt-25050-25170 | 4491 | GACCGCCCCCGCCTGGCCCTCTCGGGCCAGCCCGGGTGGTCTGCCCTCTCTGTCTTCAGAGAACAGGAGCTCGGCCACCCAGAGCCCTCGGGCCCGCTCC                    | 12 |
| wt-25170-25290 | 4492 | AGGGCCCTCTGGTCTCCGCTCCCTCTGACCCAGCCGTAAACCACAAAGAAATGTCTGAGGGAGCCACCCCGGGCCAGGTCACAGCTCCGCGGGGACCTCAGAGGCGCT            | 8  |
| wt-25290-25410 | 4493 | CCCCGGTCCCAGGCCAGCCGAGGGACCCCGGCAGCCCGGGCGGCCAGAGGCCGTTCTCGCCCTTCCCGGGTTCAGAGCCAGGATGTCCCCAGAAAGGACCCTAGGCGTC           | 12 |
| wt-25410-25530 | 4494 | CCCTCTCTCCCTCCAGGCCGAGGCTCTCCCTCGGGAGAGGGGGCTTGTGGCCCTCAAGTCAGCCACCAGAGCCGAGTGGCCGGATCCCCACCAGGCCCTTCTCTGT              | 8  |
| wt-25530-25650 | 4495 | CCCCCTGCTCTCTCAACCTTCGCTCCACCTAGACCCAGCTTCTGGCTCCCGGGTCCACCAGGCCAGCCGAGGGACCCCGGCAGCCCGGGGAGTCCCTTCCCTTCCCTGG           | 8  |
| wt-25650-25770 | 4496 | CCTCTCTCCCGCTCCACCCGAGCCCTCAGCTGGCTCCCCACCGGTCATCAGCCCGCCGGAGGGACCCCGGGCGCCGTTGTCAGTCCCCCTGCAGCCCGCCAGTCTGT             | 12 |
| wt-25770-25890 | 4497 | CCCTCAGCAAGGGGCCAGCTTTTCTCCCCAGCCTGAGGCCAGTCTCTGTGCACTGTCTGTAAGTCCAGCCTCCACGCCCTCCACGGCTCCCGGGCCAGCCTGTCCACCC           | 8  |
| wt-25890-26010 | 4498 | CTCCCACGGTGGACAGGCCCTGTGTCACCCGGGCATCCCGCCCTGTGTCCACCCAGTCCCGTCCAGGGGGACTTTATGTGACCTTGGGCTGGTCCCCATAGACTCCCA            | 8  |
| wt-26010-26130 | 4499 | TGTAAGCTGCTCGAGTAGTGCCTCCAGAGCCCTTTTGGCCCTGGCGGCCAGCCGACCCCGGGCGCCCAAACCTTTGTCCAGATGTCCAGGGTCCCGAGGGTGAAGGCC            | 8  |
| wt-26130-26250 | 4500 | AGCCCTCCCGCCCTGTCCACTGCCCGTCCCGCCAGAAAGCCCAAAGTAGAGGCTCAGGCCATCGCGCCCTGTACCAGGCTGCCAAAGAGCCAGATCTAAGGCCGGAGAG           | 8  |
| wt-26250-26370 | 4501 | GCAGCCCCAAGCGGGTGCAGTAAAGTAACTCTGGTAGTATTGGACCCGAAATCTGACACTTTAGAGCTTGGAGGACTTTAAACTCTAAAATCAAACCTTTAGAGGCGAATG         | 4  |
| wt-26370-26490 | 4502 | GCGCCATTTTGTCCCCAGCGCCGATAATGGCGGACTAGCCATAAACCCAGGAAAGGGGCTCTGGTCTGCTGCTATCTTTAGAGGGAAAGGGGAGAGATAAGGCCCC              | 4  |
| wt-26490-26610 | 4503 | AGACAGGGGAGTGGGCTTTGTGTACTTCAACAAAGTCCAGGCCAAAGGGGTTGCGTGTGCTAGGCCACTTCTCAGTCCAGCGCTTACGTAAGCCAGACAGCAAAATGTCA          | 4  |
| wt-26610-26730 | 4504 | GTTCTAGGGAGGGGACCCTGCCCTGGTAAAGTGGTCTCGAGCTATTTCTGGTGCATCAGAGCCAGGAGTCCACAAATGTAAGAGGGGTTCTTACCTCTCCCTAGCCC             | 4  |
| wt-26850-26970 | 4506 | GACCGAAGTGAAGGCCCTGGACCAACCGGCCCGGGCCCGGGTATCGGGCCAGAGTAAAGTGAAGTTAATTTTTTCTGCTAAGCCCAACTCCACACACCCAGGCACACATACA        | 4  |
| wt-26970-27090 | 4507 | CACACCACGGTCTCAGGGTCCCTCGGACAGCTCTAAGAAGGCACCGTCCGCCAGTCTACAGAGGGGGCCAAAGAACCAGACGAGTCCGTAGAAGGGTCTCGTCCAGCAAGAA        | 4  |
| wt-27090-27210 | 4508 | GAGGAGCTGGTAAGCGTTACCTTCCAGGGTAAAGTAACTGACCTCTCCAGGGCTCACATAAAGGGAGGCTTAGTATACATGCTTTGCTTTTACAGGAACTGGGGCTAGTCTGG       | 4  |
| wt-27210-27330 | 4509 | GTGGGATTAGGCTGCCCAAGTTGCATCAGCCAGGGCTTCATGCCCTCTCAGTTCCTAGTTCCCTAGTCCCGGGCTTTCAGGCCCTCCCGTCCCGCTCCCGGTCCTCCAGCCCTG      | 8  |
| wt-27330-27450 | 4510 | CCTCTCTGTTACCTTTTGAACACAGCCCTGGACACATGTGCCAGACGCTTGGCTCTAAGGCCCTCGGTCCCGCTGGACCCCGCCCTCAGCAACCTGCTGCTCCCTCTGCCA         | 4  |
| wt-27450-27570 | 4511 | CCCCAGCTCCCGCTCCCGTCCCGTCTGCTCTGATCTCCCGGGTCCCAAGTGGGCCGCTGCCCGCTGACCCAGTACTGCCCCTCTTGGCCAGCACCACCGGGCCAGGC             | 12 |
| wt-27570-27690 | 4512 | CACCTTAGACCCGGCAAGCCCATCCCTGAAGACCCAGCGCCATTCTCTGTTAACGAGCAGAGAAGAAGTAGAGGCCCGGGCATTGGGCCAGATTGAGAGACAGTCCAGGGG         | 4  |
| wt-27690-27810 | 4513 | CCGAGGTTGGAGCCAGCGGCCACCCAGGTCACCAGACCCGGTCCCTCGGGGGGACAGACAGGAGGCCCGCCCGGAGTGGGCGGCTCGGC                               | 12 |
| wt-27810-27930 | 4514 | TGGGCTGGCCGAGCCGGGCTGGGAGTCTGGGTTGGGCTGGGAGGCTGCTGTCTCAGGAGGGCCCTGGCTCCCGGGTGGCCCTGGGTAAAGTCTGGGAGCAGAGGGTCCGCTAGGCC    | 8  |
| wt-27930-28050 | 4515 | GGGGAAGTGGAGGGGATCGCCGGTCTGTTGGCAGAGTCCGGGCGATCCTGTGAGACCCTCCGGCCCGGAGGTCGCCCTCAGCCCCCAGACAGACCCAGGGTCTCCAGGCAG         | 8  |
| wt-28050-28170 | 4516 | GGTCCGGCATCTCAGGGGACGAGGCTACCACCAGAGCCCGCCAGACCCGGTCTCGGCCAGCCGAGCCGACCGGCCCGCGCTGGCGCTCTCGGGCCAGCCGCGGGTTGG            | 12 |
| wt-28170-28290 | 4517 | TTCTGCCCTCTCTGTCTTCCAGAGAAACAGGACCTCGGGCAGCCAGAGCCCTCGGGCCGCTCCAGCCGCTCCAGGCGCCCTCTGGTCTCCGCTCCCTCTGAGCCCGTTAAACCCAAA   | 8  |
| wt-28290-28410 | 4518 | GAATGCTGAGGGGAGCCACCTCGGGGCCAGGCCAGAGTCCAGAGGTGAGGGGACCTCAGGGTGCCTCCCGGGTCCAGGCCAGCCGAGGGAGCCCGGAGCCCGGGCGGCC           | 12 |
| wt-28410-28530 | 4519 | CAGAGCCGGTCTCTCGCCCTTCCCGGGCTTCAGAGCCAGGATGTCGCCCAAGAGGACCTAGGCGTCCCTCTCTCCCTCCAGGCCGAGCCCTCCCTCGCGGAGAGGGGCC           | 8  |
| wt-28530-28650 | 4520 | TCTTGGGCCCTCAAGTCCAGCCACCCAGACCCGAGTGGCCGGATCCCCCACCGGCTTCTCTGTCCCTGCTCTTCCAACTTCGCTCCACCTAGACCCAGCTTCTG                | 8  |
| wt-28650-28770 | 4521 | GGCTCCCGGGTCCACAGGCCAGCCGGAGGGACCCGGCAGCCGGGCGAGTGCCTTCCCTCTCCCTGGCTCTCTTCCCGCTCCACCCGAGCCCTCAGCTTGCCTCCCCAC            | 12 |
| wt-28770-28890 | 4522 | CGGGTCCATCAGGCCGCGGAGGGACCCGGCGCCGGTGTCACTCCCGCTGACGCCCGCCAGTCTGCTCAGGCAAGGGGCCAGCTTTTCTCCCGCCAGCCTGAGGCCAGT            | 8  |
| wt-28890-29010 | 4523 | CTCCTGTGCACTGTCTGAAAGTCCAGCCTCCCACGGCTCCCGGGCCAGCTCTGTCACCCCTCCCGAGGTTGACAGGCCCCCTGTCCACCCGGGCCATCCCCGCC                | 8  |
| wt-29010-29130 | 4524 | CCTGTGTCACCCAGTCCCGTCCAGGGGACTTTATGTGACCCTTGGCCCTGGCTCCCATAGACTCCCATGTAAGCTGCTCCAGTGGTCCAGAGCCCTTTTCCCGCT               | 4  |
| wt-29130-29250 | 4525 | GGCGGCCAGCCAGCCCGGGCCGCCCCAACTTTGTCCAGATGTCCAGGGTCCCGAGGGTGGAGCCAGCCCGTCCCGCCCTGTCACCTGCCCGGTCCCGCCAGAGCCCGCC           | 12 |
| wt-29250-29370 | 4526 | AAAAGTAGAGGCTCAGGCCATGCGCCCTGTACCAGGCTGCCAAAGAGCCAGATCTAAGCCGGGAGAGGCAGCCCAAAGCGGGTGCAGTAACAGGTAATCTCTGGTAGTATTG        | 4  |
| wt-29370-29490 | 4527 | GACCCGAAATCTGACACTTTAGACTCTGGAGGACTTTAAACTCTAAAACTCAAACCTTAGAGGCGAATGGGCGCCATTTTGTCCCAACCGCGCATAATGGCGGACCTAGGCCATAA    | 4  |
| wt-29490-29610 | 4528 | ACCCCCAGGAAGCGGGTCTATGGTTGGCTGCGTGTCTATCTTAGAGGGGAAAGAGGAATAAGCCCGGAGAGGAGTGGGCTTGTGTGACTTCAACAAAGTCCAGGCGCCA           | 4  |
| wt-29610-29730 | 4529 | AGGGGGTTCGCGTGGTAGGCTTCTAGCTCAGCGCTTACGTAAAGGAGAGGAGGAGTGTGACTGTAAGGAGGGGAGGAGGAGCCAGTCCCGTGGTAAAGGTTGCTGCAGC           | 4  |
| wt-29730-29850 | 4530 | TATTTCTGGTGCATCAGAGCGCCAGGAGTCCACAAATGTAAGAGGGGTTCTTACCTCTCCCTAGCCCTCCCGCCCTCCAAGGACTCGGGCCAGTTTCTAACTTTTCCCTTCC        | 4  |
| wt-29850-29970 | 4531 | CTCCCTGCTTGCCTCGCCCGGGGCCACCTTATCACCGTGCCTGACTCCGCTCCAGCTCCAGCTAGGGGAGACCGAAGTGAAGGCCCTGGACCAACCCGCGGCCCGGCCGATC        | 8  |
| wt-29970-30090 | 4532 | GGGCCAGAGGTAAGTGGACTTTAATTTTTTCTGCTAAGCCCAACACTCCACCACCCAGGCACACACTACACACCCACCCGCTCTCAGGGTCCCTCGGACAGCTCTAAGAAGGCAC     | 4  |

|                |      |                                                                                                                        |    |
|----------------|------|------------------------------------------------------------------------------------------------------------------------|----|
| wt-30090-30210 | 4533 | CGGTCGCCAGTCTACCAGAGGGGGCAAGAACCAGACGAGTCCGTAGAAAGGTCCTCGTCCAGCAAGAAGAGGAGGTGGTAAGCGGTTACCTTCAGGGTAAAGTAACCTGACCTCT    | 4  |
| wt-30210-30330 | 4534 | CCAGGGCTCACATAAAGGAGGCTTAGTATACATTGCTTCTTCTTTTCCAGGAACCTGGGGGCTAGTCTGGTGGGATTAGGCTGCCTCAAGTTGCATCAGCCAGGGCTTCATGCCCTC  | 4  |
| wt-30330-30450 | 4535 | CTCAGTTCCTAGTCCCGGGCTTCAGGCCCTCCGTCCTCCAGACACCGGGCTTCAGGCCCTGCCTCTCTGTTACCTTTTGAACACAGCCTGGACACATGTGCCAGA              | 4  |
| wt-30450-30570 | 4536 | CGCCTTGGCCTTAAGGCCCTCGGGTCCCTCCGACCCCGGCTCAGCAACCTGCTGCTCCCTCCTGCCACCCAGCCTCCCCCTCCCGTCCCTTCGCTCCTGATCCTCCCTCC         | 8  |
| wt-30570-30690 | 4537 | GGTCCCCAGTAGGGCCGCTGCCCTGCACCCAGTACCTGCCCTCTTGGCCACGCCACCCGGCCAGGCCACCTTAGACCCGGCCAAGCCCCATCCTGAAGACCAGCGGCCATTC       | 8  |
| wt-30690-30810 | 4538 | TCTCTGTTAACGAGCAGAGAAGTAGAGGCCCGCGCCATTGGCCCGAGTTAGACAGCAGTCCAGGGCCGAGTTGGAGCCAGCGGCACCCGAGTCCAGCAGCCGGTCCCT           | 8  |
| wt-30810-30930 | 4539 | CCGGGGGAGACAGACAGGCAGGGCCCGCCGACGCTGGCCAGCCGAGGAGCCCGGAGTGGGGCTGGCCGAGCCCGGCTTCGGAGGTTCTGGGTGGCGAGCCCTGCT              | 12 |
| wt-30930-31050 | 4540 | GTCTCAGGAGGGGCTGGCTCCGCCGGTGGCCCTGGGGTAAAGTCTGGGAGGCAGAGGGTCCGGCTAGGCCCGGGGAAGTGGAGGGGATCGCCCGGGTCTCTGTTGGCAGAGTCCGGGC | 8  |
| wt-31050-31170 | 4541 | GATCCTCTGAGACCTCCGGGCCCCGAGCGTCCGCTCAGCCCCCAGACAGACCCAGGGTCTCCAGGCAGGGTCCGGCATTCAGGGGCAGCAGGCTCACCACCAGGCCCCCCAG       | 8  |
| wt-31170-31290 | 4542 | ACCCGGTCTCGGCCAGCCGAGCCGACCCGCCCGCCGCTGGCGCTCCTCGGGGCCAGCCCGGGGTTGGTCTGCCCTCTCTGTCTTCAGAGGAACCAGGGACCTCGGGCACC         | 8  |
| wt-31290-31410 | 4543 | CCAGAGCCCTCGGGCCGCTCCAGCCGCTCCTGGTCTCCGCTCCCTCTGAGCCCGTTAAACCAAGAATGTCTGAGGGAGCCACCTCGGGCCAGGCCCCAGATCCAGA             | 8  |
| wt-31410-31530 | 4544 | GGTCAGGGGCACCTCAGGGTCCCTCCCGGGTCCACAGCCGAGCCGAGGAGCCCGGACGCCGAGCCCGGCGCCAGAGCCGTTCTCCCGGCTTCAGAGCCAGGATGT              | 12 |
| wt-31530-31650 | 4545 | CCCCAGAAGGGACCTAGGCGTCCCTCCTCCCTCCAGGCCCGAGCCTCCTCCGCGGAGAGGGGCTCTTTGGCCCTCAAGTCCAGCCCAAGGAGCCGAGTGGCCGGAT             | 8  |
| wt-31650-31770 | 4546 | CCCCCAGCCGCTTCTCTGTGCCCTGCTCCTCCAACTTGGCTCCACCTAGACCCAGCTTCTGGCTCCCGGGTCCACAGGCCAGCCGAGGGACCCCGGAGCCCGG                | 8  |
| wt-31770-31890 | 4547 | CGAGTGCCTTCCCTCCTCCCTGGCTCCTCCGCGCTCCACCCAGCCCTCAGCTTGCCTCCCAAGGGTCCATCAGCCGGCCGGAGGACCCCGGCGCCGGTGTAGTC               | 8  |
| wt-31890-32010 | 4548 | CCCCGAGCCGCCAGTCTGCTCCAGGCAAGGGCCGAGCTTTTCCCCCGAGCCTGAGGCCAGTCTCTGTGACTGTCTGTAAGTCCAGCCTCCACGCCCTCCAGCC                | 8  |
| wt-32010-32130 | 4549 | TCCCGGGCCAGCCTCGTCCACCCTCCACAGGTTGACAGCCCTCTGTCCACCCGGCCATCCCGCCCGCTGTGTCCACCAGTCCCGTCCAGGGGGGACTTTATGTACCCTTG         | 8  |
| wt-32130-32250 | 4550 | GGCCTGGCTCCCATAGACTCCCATGTAAGCCTGCCTCGAGTAGGTGCCTCCAGAGCCCTTTTCCCGCTGGCGGCCAGCCCGAGCCCGGGCGCCCAAACTTTGTCCAGATGC        | 8  |
| wt-32250-32370 | 4551 | CAGGGTCCCGAGGGTGAAGCCAGCCCTCCCGCCCTGTCCTGCTCCCGGTCCCGCCAGAACCCCAAGTGAAGGCTCAGGCCATCGCGCCCTGTCCAGGCCCTGCCAAA            | 8  |
| wt-32370-32490 | 4552 | GAGCCAGATTAAGGCCGGGAGAGGACGCCCAAGGGGTGCAGTAACAGGTAATCTGTGTAGTATTGGACCCGAAATCTGACACTTTAGAGCTCGGAGGACTTTAAACTCTAA        | 4  |
| wt-32490-32610 | 4553 | AAATCAAACTTTAGAGCGAATGGCGCCATTTTGTCCACGCGCGCATAATGGCGGACCTAGGCCATAAACCCCGAGGAAGCGGCTATGGTGGCTGCGCTGTCTATCTTTAG         | 4  |
| wt-32610-32730 | 4554 | AGGGGAAAAGAGGAATAAGCCAGACAGGGGAGTGGCTGTTTGTGACTTACCAGAGGTGAGGGCCAAAGGGGTTGCGTGGTAGGGCCACTTCAGTCCAGCGCTTACGT            | 4  |
| wt-32730-32850 | 4555 | AAGCCAGACAGCAAAATGTGAGTCTAGGGAGGGGACCCTGCCCTGGTATAAAGTGGTCTGCAGTATTCTGGTGCATCAGAGCCAGGAGTCCACACAAATGTAAGAGG            | 4  |
| wt-32970-33090 | 4557 | ACTCCGCATCAAGCCTAGGGGAGACCAGTGAAGCCCTGGACCAACCCGGCCCGGGCCCGGATCGGGCCAGAGGTAAGTGGACTTAATTTTTCTGCTAAGCCCAACTC            | 4  |
| wt-33090-33210 | 4558 | CACCACCCAGGCACACACTACACACCCACCCGCTCAGGGTCCCTCGGACAGCTCTAAGAAGGCACCGGTCCGCCAGTCTACCAGAGGGGGCCAAAGACCAGACGAGTCCGT        | 4  |
| wt-33210-33330 | 4559 | AGAAGGTCTCGTCCAGCAAGAAGAGGAGGTTGTAAGCGGTTACCTTCAGGGTAAAGTAACTGACCTTCCAGGGTCCACATAAAGGGAGGCTTAGTATACATGCTTCTGCTTTTC     | 4  |
| wt-33330-33450 | 4560 | ACAGGAACCTGGGGCTAGTCTGGTGGGATTAGGCTGCCTCAAGTTGCATCAGCAGGGCTCATGCCCTCCTCAGTCCCTAGTCCCGGGCTCAGGCCCTCCGTCCTCCGCTCCT       | 4  |
| wt-33570-33690 | 4562 | AACCTGCTGCTCCCTCCTCCCTGCCACCCAGCCCTCCCGCCCTCCCGTCCCGCTTCCGCTCCTGATCCTCCCGGTCAGTGGCCAGCCAGCCCGGCTCCCGCTGACCCAGTCCCGCTC  | 8  |
| wt-33690-33810 | 4563 | TTGGCCACGACCCCGGGCCAGGCCACCTTAGACCCGGCCAGCCCATCCCTGAAGACCCAGCGGCCATTCTCTGGTAAAGCAGCAGAGAAGAAGTAGAGGCCCGCGCCATTGGGCC    | 8  |
| wt-33810-33930 | 4564 | CAGATTGAGAGACCAGTCCAGGGCCGAGGTTGGAGCCAGCGGCACCCAGGTTCCAGCACCAGGTCCTCCGGGGGAGAGACAGGCAGGCCCCCGGAGCTGGCCCGGAGGAG         | 8  |
| wt-33930-34050 | 4565 | GCGCCGGAGTGGGGCCGGTGGCTGGCTGGCCGAGCCGGGTCTGGGAGGTCTGGGTGGCAGGCTGCTGTCTCAGGAGGGGCTGGCTCCGCGGGTGGCCCTGGGGTAAAGTCTGG      | 12 |
| wt-34050-34170 | 4566 | GAGCAGAGGTCGGCTAGGCCGGGAAGTGGAGGGGATCGCCGGTCTCTGTTGCAGAGTCCGGGCGATCCTCTGAGACCTCCGGCCCGGACCGTCCGCTCAGCCCCAG             | 8  |
| wt-34170-34290 | 4567 | ACAGACCCAGGGTCCAGGCAGGGTCCGGCATCTCAGGGGACGAGGCTCACCACACAGGCCCCCAAGCCCGGTCGGCCAGCCGAGCCGACCCCGCCGCTGGCGCCTC             | 8  |
| wt-34290-34410 | 4568 | CTCGGGCCAGCCCGGGGTTGGTCTGCCCTCTCTGTCTCAGAGGAACCCAGGACCTCGGGCACCCAGAGCCCTCGGGCCGCTCCAGGCCTCCTGGTCTCCGCTCC               | 8  |
| wt-34410-34530 | 4569 | CCTCTAGCCCGTTAAACCCAAAGATGTCTGAGGGGAGCCACCTCGGGGCCAGGCCCCAGAGTCCAGAGGTCAGGGGACCTCAGGGTGCCTCCCGGGTCCAGGCCAGCCGGAG       | 8  |
| wt-34530-34650 | 4570 | GGACCCCGCAGCCCGGGCCGCCAGAGCCGGTTCCTCGCCCTTCCCGGGCTTCCAGAGCCAGGATGTCACCCAGAAAGGACCCATAGGCGTCCCTCCTCCCTCCAGGCCCGA        | 8  |
| wt-34650-34770 | 4571 | GCCTCCTCGGGAGAGGGGCTCTTTGGCCCTCAAGTCCAGCCCAAGGAGCCGAGTGGCCGGATCCCGCCAGCCCTTCTCTGTCCCTTCTCCTCCCAACTTCG                  | 8  |
| wt-34770-34890 | 4572 | CTCCACCTAGACCCAGCTTCTGGCTCCCGGGTCCACAGGCCAGCCGAGGAGCCCGGACCCCGGAGCCCGGGCAGTCCGCTTCCCTCCTCCCTGCGCTCTCCTCCCGCTCCACCCG    | 8  |
| wt-34890-35010 | 4573 | AGCCCTCAGCTTGCCTCCACCCGGTCCATCAGGCCGGCCGAGGGACCCCGGGCCGGTGTAGTCCCGCTGCAGCCGCCAGTCTCTGCTCCAGGCAAGGGCCAGCTTT             | 8  |
| wt-35010-35130 | 4574 | TCTCCCCCAGCCTGAGGCCAGTCTCTGTGCACTGTCTGTAAGTCCAGCCTCCACGCCGTCACGGCTCCCGGGCCAGCCTCGTCCACCCCTCCACGGTGGACAGGCCCTCT         | 8  |
| wt-35130-35250 | 4575 | GTCCACCCGGGCATCCCGCCCCCTGTGTCCACCCAGTCCCGTCCAGGGGGGACTTTATGTACCTTGGGCTGGCTCCCATAGACTCCATGTAAGCTGCCTCGAGTAGGTGC         | 8  |
| wt-35250-35370 | 4576 | CTCCAGAGCCCTTTTGGCCCTGGCGGCCAGCCCGACCCCGGGCCCGCCAACTTTGTCCAGATGCCAGGGTCCCGAGGGTGGGCCAGCCCTCTCGCCAAAGCTGCTT             | 8  |
| wt-35370-35490 | 4577 | TGATTCCTGGGATTTTTGGGAATGTTAACTTTTCCCTTGTATTTGCTATTCAATCAACTGATCCCGCTGCATACCTCCACTTACAACCAAGCCACTACGGCCACGTCC           | 4  |
| wt-35490-35610 | 4578 | CGGCTCCCGCTCGGTAAGTGTCTTTTCACTTTAGCCCCAGCCCTCCTATAAAGTCTAGGCAAACTCCAATCACCAGCCACTTCCAATGTAGTCTCTAGAGAGTGGCTGCTA        | 4  |
| wt-35610-35730 | 4579 | CGCATTAGAGACCCTTTGAGCCACCAAGTAACCCAGCGCAATCTGTCTACATAGAAGAAGAAGGATGAAGACTAAGTACAGGCTTAGCCAGGTGATTGTGAATTTCACT          | 4  |
| wt-35730-35850 | 4580 | TTATTTACTTCTCCAATCAAGCTTCCAGCCCTCCGCTTGTAGTCTAGTATGGTTTTCCATGGGGGACTTAGTATCCGTTCTATTAGATTAACGTGCAAGACGCTAAACTTAA       | 4  |
| wt-35850-35970 | 4581 | CCAAGGTACGCAAGGACGCGTTATCCAGGGTCCACCCAGGATTTCCCGCCAAATCCCTCCTCCTCTTTATGCCATGTGTGTTGTGGCTGTGTTAGTGTATGTAA               | 4  |
| wt-35970-36090 | 4582 | TGCTGTCCCGCAGGTGGACGCTGTTATAGATGTGCAGTACCCCTAATGTAGGTCTGCTTTAGGGTGGCCAGTCCAGTACCTAGGATTAATCAGCTGATCCCTTCCCTCA          | 4  |
| wt-36090-36210 | 4583 | CCCGCAGTAAACCCAGCACTGGCGTGTGACGTGTGAAAGTTTTGCCTGAACCTGTGTTGGCCAGGTACATGCCAAACCTTCAAGCACCAGCCTGTGTTTTGCTTTACTGGCG       | 4  |
| wt-36210-36330 | 4584 | CCATCATGCTACATTTCTGCTTACATGGGGGACAAACATATCATCTAATTTGTGACACGGATAGTCTTGGAAACCCGCTACTCTCAGTAATCCCTCGAATCCCTACCAGGAAC      | 4  |
| wt-36570-36690 | 4585 | GATATGACGTCGGGATGACCTTAGCATCTGCTATGCGAATGCTTTGGATGGCTAATTAATTGTAAGACAATCACGGGGTACCCGGGGCTTATTTGCCACAAGGCCACAACAG       | 4  |

|                |      |                                                                                                                           |    |
|----------------|------|---------------------------------------------------------------------------------------------------------------------------|----|
| wt-36690-36810 | 4586 | CCCTCAGGCCAGTTGGTCCAGCCACATGTCCCCCTCTACGCCGACAGCACCACCAATTTGTCACTCTGTGACAAACCGAGGCTTACCCCTCCACAACCACTCATGATGCCACCAA       | 4  |
| wt-36810-36930 | 4587 | GGCTACCCCTCCTACCCCTCTGCCACCTGCAACACTAACGGTGCCACCAAGGCCCTACCCGTCTACCCTCTGCCACCCACACCACTACTCACGGTACTACAAGGCCCTACCGAACTTC    | 4  |
| wt-36930-37050 | 4588 | AACCCACACCATCACCACCACGCATGCATCTCCCTGTCTTGATGTGCCAGACCAATCAATGCACCCTTACTCATCAAAGCACCCCAAAATGATCCAGATAGTCCAGAACCACGGTCCC    | 4  |
| wt-37050-37170 | 4589 | CGACTGTATTTTATAACATTCCACCTATGCCATTACCCCCCTCACAATTGCCACCACCAGCAGCACACAGCCACCTCCAGGGGTATCAACGACCACAAATTACATCATCTACCCT       | 4  |
| wt-37290-37410 | 4590 | AGTCCAGGGACAAGCAACGCAAGCCGGTGGAGACTTGGAGACCAGAGCCAAACACTCCAGCTTAGCATGCCTGAACCTAAGTCCAGTCTCGGTCTTATCAGGGACAAGGGGCTGGGG     | 4  |
| wt-37410-37530 | 4591 | ACTCACCACTCTGGCCCATCAATGCCGCCCCGTTGTAGAAATCACACAGCCCAACCCCTAACGTTTACCAATACATGAACCCGGAGTCCCATATAGCCAGAGGCTCCCATTC          | 4  |
| wt-37530-37650 | 4592 | CTTCCCGGATGATTGGTATCCTCCATCTATAGACCACCAGCAGACTTAGAACAGATGGGCAAGTGTACATTTTTGAGACAACAGAAATCTCTAGCTCAGATGAAGATTATGTGGAGGCCCA | 4  |
| wt-37650-37770 | 4593 | GTAAGAACCTCGCCCTCCATCCAGTAAAACCCCTTGCCTCTCCAGCAACCAATGTATCCAAATAAATGTTACTTCTTTGCTCTTAACCATTGACACGCCTGTCACTTCTAAT          | 4  |
| wt-37770-37890 | 4594 | AAACAAGGGAAAAGGTTAGCTATCCACCAACACGACCCCAAGGAGGCTGCCAAAATTTGGTGCCTTGTCTCAGCACTTGCCAGCACTTATAGCATGGTAGGAGCTCAACTCG          | 4  |
| wt-37890-38010 | 4595 | GCCCGTCTTACTGCCACGCTACTCTCCACTCCAGTCCATGTTCCGACTCCTATGCATTTCTGCCCTCCCACTTTTACCCAGTCCCAACCCAAAACACACACACATAGAATTG          | 4  |
| wt-38010-38130 | 4596 | TTAGTTAAACAGTTTATTGATAGTGGCTGCTTTAGCCTAATTGTGATTGCTCTGTTGCCAAAACCTGTTAAGGGCCCGCACCCGCAACATGGGAAAACATAACCGCCCAT            | 4  |
| wt-38130-38250 | 4597 | CCCATGGGAGGGTAGAGCGGTTGACATGTAGGTGAGTAGTATAAAGACATGGGCAAGTAGAGGTTACTTTTAGAGTGTAGTGTACAGGCCCGGCGCAACAGTGCCACCAACCCG        | 4  |
| wt-38250-38370 | 4598 | GGGTCTGAGCATTCCATGGGCAGCAGGGACACTGCACTACCCAGGTCCTGGGGCAGCCGGGTTCTGGCGCTCCGGGGCAGCCGGCCGCGCCGGTGGTCCGCTGGGCCGCTGC          | 12 |
| wt-38370-38490 | 4599 | CCCGTCCGGGTGGGGGTGGCCCGCTGGGCACCGCTGCCCGCCGCCAGGTCTGGGGCAGCCGGGTTCTGGCGCTCCGGGGCAGCCGGCCGCGCCGGTGGTCCGCTGGGCC             | 12 |
| wt-38490-38610 | 4600 | GCTGCCCGCTCCGGGTGGGGGTGGCCCGCTGGGCACCGCTGCCCGCCGCCAGTCTGGGGCAGCCGGGTTCTGGCGCTCCGGGGCAGCCGGCCGCGCCGGTGGTCCGCT              | 12 |
| wt-38610-38730 | 4601 | GGGCCGCTCCCGCTCCGGGTGGGGGTGGCCCGCTGGGCACCGCTGCCCGCCGCCAGTCTGGGGCAGCCGGGTTCTGGCGCTCCGGGGCAGCCGGCCGCGCCGGTGGT               | 12 |
| wt-38730-38850 | 4602 | CCGCTGGGCCGCTGCCCGCTCCGGGTGGGGGTGGCCCGCTGGGCACCGCTGCCCGCCGCCAGTCTGGGGCAGCCGGGTTCTGGCGCTCCGGGGCAGCCGGCCGCGCCG              | 16 |
| wt-38850-38970 | 4603 | TGGTCCGCTGGGCCGCTGCCCGCTCCGGGTGGGGGTGGCCCGCTGGGCACCGCTGCCCGCCGCCAGTCTGGGGCAGCCGGGTTCTGGCGCTCCGGGGCAGCCGGCCGCGCC           | 12 |
| wt-38970-39090 | 4604 | GCCGGTGGTCCGCTGGGCCGCTGCCCGCTCCGGGTGGGGGTGGCCCGCTGGGCACCGCTGCCCGCCGCCAGTCTGGGGCAGCCGGGTTCTGGCGCTCCGGGGCAGCCGGG            | 12 |
| wt-39090-39210 | 4605 | CGCCGCCGCTGGTCCGCTGGCCGCTGCCCGCTCCGGGTGGGGGTGGCCCGCTGGGCACCGCTGCCCGCCGCCAGTCTGGGGCAGCCGGGTTCTGGCGCTCCGGGGCAG              | 12 |
| wt-39210-39330 | 4606 | CCGGGGCCCGCCGGTGGGTCGCTGGGCCGCTGCCCGCTCCGGGTGGGGGTGGCCCGCTGGGCACCGCTGCCCGCCGCCAGTCTGGGGCAGCCGGGTTCTGGCGCTCCGGG            | 12 |
| wt-39330-39450 | 4607 | GGCAGCCGGCCGCGCCGCTGGTCCGCTGGGCCGCTGCCCGCTCCGGGTGGGGGTGGCCCGCTGGGCACCGCTGCCCGCCGCCAGTCTGGGGCAGCCGGGTTCTGGCGCT             | 12 |
| wt-39450-39570 | 4608 | CCGGGGCAGCCGGCCGCGCCGGTGGTCCGCTGGGCCGCTGCCCGCTCCGGGTGGGGGTGGCCCGCTGGGCACCGCTGCCCGCCGCCAGTCTGGGGCAGCCGGGTTCTG              | 12 |
| wt-39570-39690 | 4609 | GCGCTCCGGGGCAGCCGGCCGCGCCGGTGGTCCGCTGGGCCGCTGCCCGCTCCGGGTGGGGGTGGCCCGCTGGGCACCGCTGCCCGCCGCCAGTCTGGGGCAGCCGGGTT            | 16 |
| wt-39690-39810 | 4610 | TCCTGGCGCTCCGGGGCAGCCGGCCGCGCCGGTGGTCCGCTGGGCCGCTGCCCGCTCCGGGTGGGGGTGGCCCGCTGGGCACCGCTGCCCGCCGCCAGGTTCTGGGGCAGCC          | 12 |
| wt-39810-39930 | 4611 | GGGGTCTCGCGCTCCACTGCACCTGGAATGCAGGGTGGGGGTGGTCCCTGGACCCCAAGCCCGCGATCCCTCCCCAGGGCGTACCCGGCTTGCTGGTCTGGGGCTCTCTG            | 8  |
| wt-39930-40050 | 4612 | GGGTCTGTCATCCGCGGTAGGTTGCAATGGCGTGGTCCGCTTGTCTGCTGCCCGGTACCGCTGGAATGCCGGTGGGGTGGGGTGGGGTGGGGTGGGGTGGGGTGGGGTGGGGT         | 12 |
| wt-40050-40170 | 4613 | CCGGTCCCTCCCCAGGGCGTCCCGCTGGCCGCTGGCCGCTGGCCGCTGGCCGCTGGCCGCTGGCCGCTGGCCGCTGGCCGCTGGCCGCTGGCCGCTGGCCGCTGGCCGCTGGCCG       | 8  |
| wt-40170-40290 | 4614 | CCGGTCTGCTGGTCCGCTGCACCTGGAAGGCAGGGGGGGGGCAGTAGAGGAGGGGCTGGTCTGGGACCCCGCCGACTGGCAGGGGGTCCCATGGCACAGGCTAGGGTCCAG           | 8  |
| wt-40290-40410 | 4615 | GGGGCAGCCGGCCAGCGCCCGCTTACGGGGAGGACCGCCGCGGACCAAGGGCCCGCCGGGGTGGGGGTGGCGCTCCAGGGCCGACCCCTGGTGCAGGAGGGACCC                 | 12 |
| wt-40410-40530 | 4616 | GCGCCACCCGCTCATGGGGGGGAGCCCGCGCAAGGACCGCCGGCCGCTGGGAGGTGTGACCCCGGAGCGTCTGGACGACGCTGGCGAGCCGGCCGGCTCGCTCTTTATCC            | 8  |
| wt-40530-40650 | 4617 | CTTTTTGGGTCTCTGTGTAATACTTAAAGTTTGGTCTCAGGAGTGGGGCTCTTATTGGTTAATTCAGGTGTGATTTTTAGCCGTTGGTTTTCATTAAGGTGTGCACCAAGTGGG        | 4  |
| wt-40650-40770 | 4618 | TGGTACCTGGAGTTAATCTATTGGATAACGAGAGGAGGGGCTAGAGGTCCGCGAGATTGGGGTAGCCGAGCCTCAGGAGGGTCCCTCCATAGGGTTGAACCAAGGAGGGGAG          | 4  |
| wt-40770-40890 | 4619 | GATTGGGCTCCGCCCGATACCTAGTGGGTGGAGCCTAGAGGTAGGTATCCATAGGGTTCCATTATCTGGAGGTATCCTAAGCTCCGCCCTATATACCAGGTGGGTGGAGTAGGT        | 4  |
| wt-40890-41010 | 4620 | AGGATTACAGTAGGTTCTACTGGGGTACCCCTTACCCTAACCTAAGGTGCGCCACCCCTCCTCCTTCGGTTTTAATGGTAGAATAACCTATAGGTTATTAACCTAGTGGTGAATAGG     | 4  |
| wt-41010-41130 | 4621 | GTATTGCAGCTGGGTATACCTATAGGTATATAGAACCTAGAGGAAGGGAACCCCTATAGTGAATCCCTCCCCCTTACCCCCCTCCCTTACGGTTGCTGAGCCATCCCCACCC          | 4  |
| wt-41130-41250 | 4622 | CCAGCACCCGGGGTACGTGGCACCCCGCTGCCTTACTGACTTGCACCTTTGCACATTTGGTCACTGACCGATGCTCGCCACTTCTGGGTATGACTGGCTGTGCCTGTGCTCC          | 4  |
| wt-41250-41370 | 4623 | GTGGACAATGTCCTCCAGCGTGGTGGCTGCCCTTTGGGATGCATCACTTTGAGCCACTAAGCCCGCGTGGTGGTGGTGGTGGTGGTGGTGGTGGTGGTGGTGGTGGTGGTGGT         | 4  |
| wt-41370-41490 | 4624 | GCCCCGCTTTAGGAAGCACCAGTCCCGGGACGGAAGGGACTTGGGGTATTCTTATGTGGGGTGGAAATATGAGCAAGAATAAGGACGGCTCCTTATAACCTGATCAGCCCG           | 4  |
| wt-41490-41610 | 4625 | GAGTTGCCTGTTTATCACTAACCCCGGCTGAAGAGGTTGACAAGAAGGGTCAAGGTTTCTGTGTGTTGAAGGGCAGGGGCTGTTGGGTGCATCGAACGGCTTACTCGGGTA           | 4  |
| wt-41610-41730 | 4626 | ACTGTTGCCATTAAAAGGTTGGGGATTAGGTTAGCCCTTTAGCTGCCATTTGCAACCGGGGTGTCAGATGCAGGTCCGGGTGGGCAGGCAGTACAGATGTACAGTTGTGTTGT         | 4  |
| wt-41730-41850 | 4627 | CTTCTCCACCCCTGTCTGGCTGTGGCAATGCGACCCTCATAGAGTTGTGTTTTCAGGTCTGTGCTGTTTGGCGTGGGTTATTTCTCCCTCAGTGTGGCAGCTTATTTCCC            | 4  |
| wt-41850-41970 | 4628 | CAGTTTTACGTACTGGGCCCTGTGACACCTGAGGGAGCGGCTTGGTGGTATGTTGGAAATGCTCCACCCCTCAATTTTCGCTTGCCCTTCCCTTGGTTAACCTGATAGCAT           | 4  |
| wt-41970-42090 | 4629 | GCCTTAGGTTTCTTAGTCTGTTTGGGTTTGGTTCACGTGGTGTAACTTGAATTTTTGGTTTTCTAGTCCCTTAAATTACATTTGTGCCAGATCTTGTAGAGCAAGATG              | 4  |
| wt-42090-42210 | 4630 | GCCTATTAACAAGGGAGATACTGTAGCCCTGTGTATACGGGACAGTGTGCATGGAATGGTACCCTGCATCTGTGGAGCTAGCAGCAAGAGAAACACCTCTCCGCTTTCCG            | 4  |
| wt-42210-42330 | 4631 | CCAGAGGACACTGTAGTTCTGCGTTATCATGTGTGCTTGGAGAGATAATTGAACGAAATTCAGAGACATTTACAGAAACTTGGAAACAGATTTATAACACACACCCGAACATGTGGATCTG | 4  |
| wt-42330-42450 | 4632 | GATTTAACTCAGTATTTTATAGATAATTTCCAGCTGGAGACCAAGCCCTGGGGCGCGGTTGGCTGGATGGCCTGGTGCATGCATGCCTGACGAGCAATGTGTTGAACCACTACT        | 4  |
| wt-42450-42570 | 4633 | CTTACTATGTTGTGACCTGTGAGTCTGGGATGTAGAAAGCTGAGGAGCCGAGGGCTGGATGGTGGATCATCAACAGGGCGGCTGGTCTACATTAATGAAGACAACTTCTGGATCC       | 4  |
| wt-42570-42690 | 4634 | AGAAGGTTTACTGGACTTTGTTCTTGTGACTGACTTTGAGTCTGTAGTTATATGTAGTTATTTATTTATCTCCAGAGGAAGACACTAATCTATACATTTCTCAGCACTTATAT         | 4  |
| wt-42690-42810 | 4635 | GAATCAGGGTCATTGGCCCTGCCGGAACTGAGCCAGTAGGATATTAGGCAAGGGTGCACAGTGCCCATGCATTATAATTAACCAACAGTGGTCGTGAGTTTAGCCGGCCATGGG        | 4  |
| wt-42810-42930 | 4636 | GGCTTACAAGAATAACATGCCAATGACCCGCCCCACTTTTAAATCTGTTGCAGCAGATAGCTGATACCAATGTTATCTTTGCGGCAGAAATGAAAGTGTGGCCATATCTACAA         | 4  |

|                |      |                                                                                                                            |   |
|----------------|------|----------------------------------------------------------------------------------------------------------------------------|---|
| wt-42930-43050 | 4637 | TTGGGTGCTCTAGGTGGGATATACGCCCTGTGGTGTCTAACGGGAAGTGTGAAGCACACACGTAATTTGAAGCGGTGCTTACGCTCTTCGTTAAAAAACAACAAGGACAAGATACTA      | 4 |
| wt-43050-43170 | 4638 | AAGAAATAACTGAGGTGAGTGTGGGAAAGATGGGAATACTATGTGTATGTTAACGGGTGAGAGCCTACTGACGCCAGACTCGGGGGGAGGAGAAATGGTAAGAGTTATACTCTACT       | 4 |
| wt-43170-43290 | 4639 | TATCTTTTTGACACTACATTTAACTGTTATGTAAACAATGTTTGCTTATTTTACATGTTCAATAAACCGCTATGTTAATGATGAAGAACCTGTGTCTTTGGAAGTGGGCCAATGGGGTAG   | 4 |
| wt-43290-43410 | 4640 | TAGGTTTTGGGAGGTGCCGTGCTAGATATTTCAACTGCCACAGACCCCATTTTGTCCCACTGTTACCACATTCAGTCCCTGCATCCAGTGGGCCAGGTGTCTACCATGGCTCTTTC       | 4 |
| wt-43410-43530 | 4641 | TAGGTGGATACCACAGTCCAGGCCCAAGGCTACCGTGTCTAATACCTCCCTCATGTCCACCCCCACCCCTGTGTACTGTCCGCTGATTATCCTGGCTTAGCAGCTCCAAGTTTATCAA     | 4 |
| wt-43530-43650 | 4642 | GACGTCCCAATGCCCTGCCCTGGTCCAAGTGTCCGCCGTTTTCCAGCACCTGTTGTAGCCTGCCCAAGTTCGCAGGTTTTCCCCATGCTTCACCCGTTAACCCAATGATCATGACA       | 4 |
| wt-43650-43770 | 4643 | GCCAATCCAAACACAGGCAAGTTTTAAGAGTAAAGCAACTACTGTTATTTTTCAAATAAGTCTGATGATCTGTAGGCCGACGCTACCCCACTTTCCAGTCTCTGA                  | 4 |
| wt-43770-43890 | 4644 | TGGCCTCGTAGATGGCATCTTCGTGCAGATTGACAGCCTTCTCATATACCGTGTCTCTGGGGTGCACCTTTATACAGAAGGCGTCCCCTACTAGTCCACGGCCAGCTCGTAGTGGGGC     | 4 |
| wt-43890-44010 | 4645 | CTATGTTTTACATAACAGTTTCAAGCAGGTCTCTGGGATGTGAAGGGAGGTGCCCTGGAGCAGGAGATGCATGATTAGGCCGCCCTTTCCATTGTGTGCTGAAGATGGGGCAGATGGTGC   | 4 |
| wt-44010-44130 | 4646 | CACAAAAGTGTCCGGTGACCAGGTAAGCGTAGAGAAGGCTGGGTTGGGAAAGTCCAGCCTTACTGCACCTGGGAGAGCTGCTGAGCAGAGACACATAGAAGGCTTTGTGGGTATTATCT    | 4 |
| wt-44130-44250 | 4647 | TGTGGACATTGTTGAAGAAGGAGAGCTGGTGGAGCTAACTCTGAGGCACATGAACCTGGACCTATTGATGCAGATCTCGCATGAGACCCAGAGCTAGGCTGTGGCCGAAGGGAG         | 4 |
| wt-44250-44370 | 4648 | ACAGGCCAAAGCCAGGCCCGGGGGAGAGAGTGCACAGTAGACAGTGGGAGAACAACAGCCCTCTGAGACATGATGTTGGGGTGTTCATCTCACCGAGAAAATCTTTGCCAGCTCAAAGTTGG | 4 |
| wt-44370-44490 | 4649 | CAGAGATCCCCTGAAGAAGTCCCGTAGTGA AAAATGGGATCTGTCTACACCATGTCTGGTGTGCCGGAAACATATTGATCGGGCCACACTGCCAACCCCTTCCATTCTCCAGCTCTG     | 4 |
| wt-44490-44610 | 4650 | AGCGAGATTTCCACACCTGGACACCGACTTCAGCTATGGCCGAGGGCTTTGAGGCCGTGTAGTTCTGTGGTCCGGATGCATTAGGCCGGCCAAATCGGGGATCGCCGGTCTGCTGTT      | 4 |
| wt-44610-44730 | 4651 | GGCGTGCATTACGGCATCTGGGGTGACCGGGGCCATCGGGTTACTTTTACACAGTAGACCTGGGAAAGTTGATAGGACTGACAGGTCAAGGCCGTGGATGCCAGGACCACGTCCA        | 4 |
| wt-44730-44850 | 4652 | GTTCTTAGTGACATCCACAGGAGTTGTTTTGCCACTTGGCCACTTGTGGATTAAATATGTACACAAGCGTAATTAACGAGTACAGACCCCTGTTCCAGATTCTGACCCGGCTG          | 4 |
| wt-44850-44970 | 4653 | CAAGCGCTGCCCTAAAGGCCTGGAAGCTGGTGGTAAATCTGACCAAACAGCAGCTCGGATTCGTGATGCTGTGTTGATGGCACAGGGGGTGCAGAACAGGTCTTGGGAAGT            | 4 |
| wt-44970-45090 | 4654 | CTTGCCGGGTGCACATCTGCAGCCAGGCCCTTAGCCTGGGGCATGGCACATCCAGCAGCGTGTGTTGGTCTTGATGAGGAACAGCATCTGTCTAGGATTTGATGTTGTTGCCGAACG      | 4 |
| wt-45090-45210 | 4655 | AGTCAAGAATCAGGCTCTTGAGCGGTCAAGGGTCTCTTGCGTCCGGTGGGCCCGAGGCTCTCGCAGAGTGGGCAGATGGTCCGTGAGGCATTCTGTGCTTAGTCCAACATGG           | 4 |
| wt-45210-45330 | 4656 | GGGCCAGGAGGCAGGGCCCTGCGAATGGTCGCCAGCCTCCGGTCTGGTGTGTTGAGCCAGGGCAACTCCGCCACCTCATCGCCGCTGATTTCCGCGTTTAAACCGATAGCATGGTGGCCCTG | 8 |
| wt-45330-45450 | 4657 | GCCCCCGAGCAGGTCCGTCCCCTGCCAGTACCTAATAGTAGTCCACAGTAGTCCGCTTGGTGTAACTTTCAGGAGAGAGTCTCCCTTTCCGGCCCTGAGAAATGGATGCTGAACTC       | 4 |
| wt-45450-45570 | 4658 | GGTTTTCTGTTAGGCAGTGGCAGCAGGGCCGGTGTACAGCCCTGCCAGCTCCCTGGGCACTCGTGGAAATCTTTCAGGTTCTGGGTCCAGGGGTAAGAAAGTGGGGTGG              | 4 |
| wt-45570-45690 | 4659 | TTCTGGGCCACATGGACTTGAAGCAGAAGTTGGCCGGGACTGGCCGGTGGAGTGGATTTCAGAAACTCCAATTTGATGAGCCAGGTTGGCATTCTTAATCATGTCAGAAGAGGACA       | 4 |
| wt-45690-45810 | 4660 | CAGGGAGGAAGCACCGGCAATGTAAAAGTGAAGCTGGATGTCAATGGCAAGAATCTGGAGGCATGAAGAGGGAATCAACCCCGGCCATGGGAAGTATTTTATCAGGATGTGTA          | 4 |
| wt-45810-45930 | 4661 | AAAAGTCCATGCCTGTGATGAGGCTAGAGATCCAGGCTCGTGGGGCAATTAGACAGTAGTAGCAGAGCAGGGCATTGTCCTCAAAGAAGGCCAGGGGGCATCTGAGTGATTGACCAGGG    | 4 |
| wt-45930-46050 | 4662 | TGTCGAGCAGATCACAACCTCGGCAGGTGTGGCTGGAGAGAGGGACTCGTAGGTTGGACAGTGGTGGTAGGCTATGCCTTCTCCGCTTGGCTGGAAGATAGGAGTGGGCCATCA         | 4 |
| wt-46050-46170 | 4663 | AAAGCCGACTGCCTCGAACTGGCTTTTCAGATTGTCCAGGTCCAGGGCACAAGCTCCATCTTGGAGTTCTGCCCAGGATCTGTGCCACTCTTTACGCCACTCTGTGAGGG             | 4 |
| wt-46170-46290 | 4664 | GGCAGCTGGACAGTCTTTTTCCGGTCAAGGGGTTTGGCTGTTGCGCTCGTGACTTTTGAGCCATGACACACTCTGGGTGGCAAGTTGAGGTCTTCGGGTTTTTAATACCGGGCTCGG      | 4 |
| wt-46290-46410 | 4665 | CACCAGTTTCTGGGACACCGCCACAAGGACAAGGTGGGCTAGCAAGTTCGAGTCTACGAAGTCTCCGGGGCAGCTTTTGTAGTTCTCGCTATGATCCACCCCAATCTCGCCCCC         | 4 |
| wt-46410-46530 | 4666 | TAATTGCGCATCTGCCTACGCGAGGCTGAACCTCCTGAATCACTGCATCTTCTTGGGCGTTAAAGAAGAGAATAGTGCCAGGGCCCTCGTGGGGTCCAGCGTGAAGTCTTATTTT        | 4 |
| wt-46530-46650 | 4667 | TGAAAAGGGATATTATAAAAACAGTCAATTGCTCGGATTGTGGCAGCCGATAGCACCTTAGATCTAGTGAATCATGGCAGCCCGGAAGAGAGGCTCTAGACGAGCTCAATAACGTAATT    | 4 |
| wt-46650-46770 | 4668 | GTGTCAATTTCTGTGACTCTGGTCTCTGGAAGTGAGAGATGTCCGGGGCCATGTGTTCTCAGGGCCAGCTCCCAACCCCTCTGCACCGTGAAGCTGCGCCAGGACAGATTTAC          | 4 |
| wt-46770-46890 | 4669 | CACCTGGAGTTTGTCTACAAGTTCCTGGCCCTTAAAGCTGAAGAACTGCAACTACCCCTCCTCGCCGTGTTTTGATATCCAAACAACCGCCCTGGCCACCACCTGAGGTCTTTTTGCAC    | 4 |
| wt-46890-47010 | 4670 | GAGCCGTCCGGTCTCAGATCGGGCCAGAGCGCCCTTCCCTGGTCTCTCAACGGATGTTGACTACCAAAGAAGTCCATCATTATGCTGGGCCAGGATGACTTCATTAAAGTCAAAGG       | 4 |
| wt-47010-47130 | 4671 | CCCCTGGTCTCCCTGCTGAGCTTGATCTCTGAAATCTATGTTGGTCTGCCGGCCCTACATACCGAAACACCGGACGACGATGCAGTTTCTGGTGTTCAGGCCCAAGCCCGAGAAG        | 4 |
| wt-47130-47250 | 4672 | GCCTCGCGGGTACATGGATATGATTAGTGATATGTCTCAGCAACTGTCTCCGCTCTGGTCAAGTCGAGGATACGGGCCAGAGTCAAGGTTGGAGGAGTCCAGGCCGTGGCTACCGCAC     | 4 |
| wt-47250-47370 | 4673 | TCGGGGTGTCTTGGGGACTCACAGTTAGGGGGCCGGTGGTTGGGACTTGGATACTTTTTCAGAAAGTGTGAGCCAAAGACGAGGGCAGTTACGCTCCTGGAGGGACAAGACTCGTGG      | 4 |
| wt-47370-47490 | 4674 | TCGGAATCCGAGGCGCGCCGTGGAAGAAGAACTCTGAGGCACCCCTCCGCAAGCAGCCAGGACTCGCCGTATGCGCGGGAGCCATTCAGGGTGAACACGTCGCCCC                 | 8 |
| wt-47610-47730 | 4676 | TGACGTTGCAGGCCCTTGGGGAGCGGGGTTCTCCAGGCTCCTGGATCTGGGGTGGCCTGCCTGGATCTGAGCTATGTGGAATGAGGGAATTTGTGGTGGGGCAGGCCCCAGCTT         | 4 |
| wt-47730-47850 | 4677 | CTGAGCGGGTGTGGCCTTACGCCAGGCTCGCTTTCCGAAGCCTCGTCCGCTACTGGTGTGTCGGAGGTGGAGAGGCCCGGGGGCTTGTCCGCTGGGCCAGGTACAGACCAGCC          | 8 |
| wt-47850-47970 | 4678 | CCTCATCCCTGACCTCGCGCCCATCTTGGCCCGTCCCTTGTCCCTTTAGTGTACCCGTTGGTGGTGGAGCCGTTGCAACGCCCTTTTCCAGCTTATTTTTTGG                    | 4 |
| wt-47970-48090 | 4679 | TTGTGGGTCTGTTTTCCCCTGTTTTCCGATAGAATAGCTGCTGGATCTGCGACCCGTCCTTCTGCGAAAACACCCGGGCCCTGGCCAGGGTACCCAGGGCTCGTGAAGAGGT           | 4 |
| wt-48090-48210 | 4680 | TCTTGGCATTGCTGTTGAGCGTAGTACTAGCCCCCTTTGTTGAGGCAAAACTTAGGCCTGTGAGAGCCTGCTTTGCCATCAAGAAATATGTCGCCGGCCTGGACTACAAGCT           | 4 |
| wt-48210-48330 | 4681 | GTGTACGCTCCGAGCTTCTCCGCTGGGCCAGTCTACGCCAGCGAGCTCGATCCCGGGAGATTCCGACAGAGTTACACACGCACTGCACCTTCTGCTGGCTGATCATGCCT             | 4 |
| wt-48330-48450 | 4682 | CGGCTCTATTGGCTCCCTCCAGAAGAAGGCTCCGACACCCCTGTGGGAATCCATTCAGTGGATGGTACCCTGTTGGTAAACTCGTCCCTGAGGAGTGCCACTGTCTTCTGC            | 4 |
| wt-48450-48570 | 4683 | CTATACCTGCCGTCTCTGAGGGGGGAGAAGAAGCGGGCGGGGGCTAGGGGAGGAGCTCGTGGGGGGCGGGGGCCCTGCCTGAGCCGGGATGTTTCCGTGGCGATCGTAAGCCGCAATG     | 8 |
| wt-48570-48690 | 4684 | TTCTCTCGTCTGCTGAACGTGCTCCCGGGTCCCGGGCCACAAGTGTTCAGATCCACGCCCTCAGACCCGGTGTCTGGCCGGATTACCCCTTGGCCGTGTTTGCATGG                | 4 |
| wt-48690-48810 | 4685 | ACTGCGTTACTGCTTGAACTTTGAAGAAGCAGACAGGTGTAGGAGCGACTCAATCTTACAGCCACTCTCAGTTTATCCCGTGAACAGAGGAGAAGCATGTGCTGACTGCTC            | 4 |
| wt-48810-48930 | 4686 | ATGCCAGCGCCGTGTACTGCTCCAAGTCTCGGCTCTGGCGGTGGGCTGCCAGAGGCTGGCTGAGCCAGCGCCCGCTCGGGCTGGCGGGCCCAATCCGGGGAGTGTGCCCGC            | 8 |
| wt-48930-49050 | 4687 | ACAACCGGCTACGAGCTCGACCCTGGCTCCCGCTCTGGATGCCATCATCCCCTGTTGGGACCCAGCCACTTGCATCGGGCGGTGGTCTGGGGGGGTGACGGTCAGGCAGC             | 8 |
| wt-49050-49170 | 4688 | TCCTGATTTAACTTTGCGGACAGAGCCAGAGCCGTTTCTCCTCATCTGTACGAAACGCCAAGCTCCAGAGGACGCCCGCACGAGCCTCACCTGTTCTCCTCTGTTTAGAGGTAGAAT      | 4 |

|                |      |                                                                                                                          |    |
|----------------|------|--------------------------------------------------------------------------------------------------------------------------|----|
| wt-49170-49290 | 4689 | TGCCACCTGGTGAGCGGTGTGGGGCTGCCGTCTCTATCAGACGCGTTATGGCACGCCGGCTGCCAAGCCACCCCTCCAGGGGAGGCTGGAGGCGGATTTCCAGACAGTCCCCTGCTT    | 8  |
| wt-49290-49410 | 4690 | CCTAAATTTCAAGAGCTGAACCAAGAATAATCTCCCAATGATGTTTTTCGGGAGGCTCAAAGAAGTTACCTGGTATTTCTGACATCCCAGTTCTGTACGAAAGAGTACGTGCAGAGGACT | 4  |
| wt-49410-49530 | 4691 | TTTGGGGTGCCCTGGCGCCAACGCGCCATAGACAAGAGGCGAGAGGCGAGTGTGGCTGGGGCTGGTGCTCATGCACACCTGGCGGGTCCAGCAGGCTCAGGCC                  | 8  |
| wt-49530-49650 | 4692 | GCCGCATCCGCTGGGACCGGGGCTGGCATCATCAGCGCCGCTCCACGGCCGAGCCAGTCCCGGACCCCTCTGTTTTCTCATCTATTAGCAGCCCTCGGGCCGCGACTTCGGGGGCG     | 8  |
| wt-49650-49770 | 4693 | ACTGCCGCCGCTCCGCCGCCAGCCGTCGATACCGGGTCAAGTGGCGGGGACAAACCCAGCACCGCCACCGCGGGGCACGTAAGAACAAGTAAAGAGGGCCACGAACAATGGTGTAT     | 8  |
| wt-49770-49890 | 4694 | GCATCTTATTAATAACAATACAGATACAAAACCTTGAGTCTCTCGAGTTCGCGATGCGGAGTGGTGGAACCTCCAGCTTGGCGGAAGCTGGCTACGAAGCGAGACAGTACT          | 4  |
| wt-50010-50130 | 4696 | CCTCCCTGATAATGTCTTCAATAGACAGAAATTTGGTGACCACTGAGGGAGGTTCCACAGTAAATGTTGGTCTGTAGATGGCGCGGGTGAAGGCACGCTTTCGGAACCGAAAGTG      | 4  |
| wt-50130-50250 | 4697 | CTTGAAAAGGCGCGGGATAGCTGCGCTACCGGATGGCGGGTAAATACATGCTATCCTTACATTTTGGCATTTTGGCAGCTGGGAGGCGGCGGATGGGGTGGCTTTTTCGACCGGTGT    | 4  |
| wt-50370-50490 | 4699 | CAGGGAGAGACACGCGCGGGGAGATGAGCGCCAGCGGGGCGCGGTGGGCTGCCCCGAGGACGGCGCGCGGCCAGCGCCCCGTGGCCTTTGGCACGGGCTGGCACCCACCG           | 12 |
| wt-50610-50730 | 4701 | GGCGGGTGCCCTGGGGATGGGAAAGCCGAGCGGCCCTTCTCCCGGTGCAACGCTGGAGTAGCGGAGGCTGTGCGCGCGCGGCCACCACGGCGCAGCGGGTGCAGCCCCGACGGCCG     | 12 |
| wt-50730-50850 | 4702 | TGGGAGGCGGGTGGCGGAGGGCGAATCTCCCGGCTTCTCCCGCCCCCTGCTGTTCTTCTCCGTTGCATGATAGAATGCCATAGGGTGGTGGCTGAGAGGAGGCTTGTGTGT          | 4  |
| wt-50850-50970 | 4703 | CCTGGGCTGGAGCCAAAGTCTTAAGATGCGCGCTAGGGTGGGAGTATGCCTTCCCTGCAGCTGGCGGGCTGTAGGGGGCTGAGGGTGAATAACTGGGCTTCTGTGAAGGCA          | 4  |
| wt-50970-51090 | 4704 | CAAACCCGGAATCTGGATGGTATGTTTCTCTGTGACCCGAGGCGAGTGGTGTAGAGTGTGGAGACAATGTAGACGATGGGCCCTTGTTCAGAAGCCAGGGACTTGGGGGG           | 4  |
| wt-51090-51210 | 4705 | GCTGTGTGGTGGTGGGAAAGGAGTCCAGGGAATCTTTGGCCATGGCCTTGGGAGCTTCCCGGAGACCGGCTGGGCTCTCGAAGCCCTCGTTTCGGCCCCGAAATAGGGCC           | 4  |
| wt-51210-51330 | 4706 | TTGCCATCAATCGGGGGCTGGGAGAGTATGGGGCGGCCAATCCCGGGTAACTGTACGCTCCGGGGGAGGAGGTAGGAGACAGCCAGTCCCTGGGCTGCCAGGGGCCACCTTCT        | 8  |
| wt-51330-51450 | 4707 | CTAAGAGGGGGCTCTGTGGGCTGGGAGGGCCAGAGGCTCAGATTACAGCAGTAGTCTCCCTTTTCCCCTGGTCCGCTCCCTCCTCCAAGTCTGGAGCCGTCGGAGGAGGGCCG        | 8  |
| wt-51450-51570 | 4708 | GGTGTATCTGCTGACTGAACCCGCTCCCGCTGACCAGTCCGTGCCCAACCCTTGGGGGAAACCGAGAACAGCTCCTGGACGTTGGTGGATTCGGGGGAAGCTGGTATCCAACCG       | 4  |
| wt-51570-51690 | 4709 | GCAGTGGAGGATCTCTGCTCGTAGAAGGAGGGTGTAGTACATCGGTGCGGCATCGTGGGCGCCGCGCGTTAAAGTAGAACTGCAGTCCGGCAGATTGTCCGATAGGTGAAAC         | 4  |
| wt-51690-51810 | 4710 | ACTTCCAGATGATGTTTTCTGTTGGCCAGGATGGCCACGGTGGGGGCGCTGGCTCCTTAGTGTGGCGCCCTGGCTCGGTGAGAAGCTCGCGTAGCCACACGGCCTGGCTGCAA        | 4  |
| wt-51810-51930 | 4711 | AGATTGGACATCTCTGGCTCGAAAGACTCGGAGTAGCCGTCAGAGTCTGCAGAAAATCAGCGAGATGGTCTCCACAGGGACCGGAAGGGCTCAGAGTGCCCGTCCAGTAGAGGAGGG    | 4  |
| wt-51930-52050 | 4712 | GAGCAACGACCCTGACCTGCCAGGGTCTCAGGTTAAACAGATATTGAGAGGAGACAAGAGAGTATAGGGGCGCAGCCAGGAAAGGGCCGCCACGGCCGCTCAAAAACGGAGACGG      | 4  |
| wt-52050-52170 | 4713 | GGATGGTGCACCCGAGCCCTTAGGACCGTATGGGAGTGCATAAGGCATAAGATTTCTCAGGGCCGCGGTAACGGTGGCGTAGGAAGAGCGGGTTTCGGGGGGACGCTCGA           | 4  |
| wt-52170-52290 | 4714 | GTCCCTCCGCCCTGGGAGCTCTTCCGCGTGTATAGCCCTGCTTCAAAAGTCGCGCAGGTAGTCTGAAATGCGACCGGGCCCTCCAGCGGGCGAATGAGTGCCAGAGCTGCTGAA       | 4  |
| wt-52290-52410 | 4715 | GGCCTCGGGGGCGAAGCACCGGCTGCGAGGAGCAGCATGCAGGCTGGGCGCGGGCCGTACTTGGTTGTGACCAGGCCAAGAACTCGGGGTGCGGCCAGAGGGGCGCTCGGGTAT       | 8  |
| wt-52410-52530 | 4716 | CCATCTCCTCCAGGCGCTCGAAAGAAGTAGAAGCCGTTGGTGGACCGCGATCGGTTGGCGGGTAGAGGCGCGCGCTTCCCGCTGTTGCTGCCGCGGGTGGTAGGGCATTGC          | 8  |
| wt-52530-52650 | 4717 | CCCCCTCCCGAGGCTGGACTCCTGACCAGCCTGTAGGTGAGGACCGAGTCCGACAGGAGGTCTCCAAACCCCATCTCTCGCTAGAGCCGAGACAGGCGGAGTCTGCGTAGAACG       | 8  |
| wt-52650-52770 | 4718 | ATGGGCGCCCAAGGAAGCGGACGCTAGGCGCGATGTGCGCCAGCAGCAGCCCATCTCCGTTGTCCAATAAGTAACTCCCGTCTGTGGCCGGGCTGGATAAGGGGGGT              | 4  |
| wt-52770-52890 | 4719 | GATTCCTAGAGCGATGAGACTGGCGTGCCTTAAAGTGTATGGGAGTATGGGTTGTGCCAGTTCCTCATAGGGCTTTGGCGCGAGAGACGTAATCCCGAAGCAGCTCCCGG           | 4  |
| wt-52890-53010 | 4720 | CGTTGGACTCCAGTCCGGCCAGGTGCTCCAGTAGGAGTCCGCGCGGCGGCGCTGAGGCGGGCGGAAGCTACACTGGCAGGGTTCTTCTCCTCTCTTTGGTCATCTCGGGGGAC        | 8  |
| wt-53010-53130 | 4721 | CAATAGCTGGGGGCGTCCGGCTGGGCTCAGGGAAGGCCCTGGGTTCTCCAGCAGCGTGGGATGACATATTCCAGAAAAGTGTGGTAGACGGGATGAGTGTAGCGGCTCCTGGG        | 4  |
| wt-53130-53250 | 4722 | TGCTGCGGAGACGTAGCCGGGTTAAGGGGGTGCAGGGAGACTCTGTTTCCAGCCAGAGGGTGGCGGCTATTTCCGCCGCCAGAAATTGCCCGCCGGGTGGGG                   | 8  |
| wt-53250-53370 | 4723 | CTCCATTGCCCATCCAGTTGGTGGTGGCAAACTGTATGAGGAGGGCAGGTTGTTGGTCAAGGATGCTTAACGAAAACGGTAGGCTGGCGGCTCGTAAAAGCCAGGAACTCT          | 4  |
| wt-53370-53490 | 4724 | GCTTGGCCGAGGCATAGCCGAGCAGCTTGTCTTGAAGAGGCACTAGTGGAGCCAGCCGAGGCCCAAGCCGACGCGCCCTGGCAGCCTCCACACGATCTTGAAGTGGCGCGGGTCCG     | 8  |
| wt-53610-53730 | 4726 | CCTTGCCCGCGCAGCCGCTTGGGGTCCAACGTGGCCAGAGCCAACCTCAGCTCCTCCATGCCATCCATGGAGTCTGGGCCATGCCCTGACTTCCAGGAGCCGTGTTAGCTCATGAA     | 4  |
| wt-53730-53850 | 4727 | TTTACCGTACGCGCAGCGGCTAGGTTAGCCAGGACCCCGCCCCAGCTAAGGCCAGGGCTCTTCCGAAAGACCCCGCAGCCCTCGAGATGCCCGGATCCACTTGGCGGCTG           | 8  |
| wt-53850-53970 | 4728 | CCAGGGATTTCCGGTAGGGCCATGAGCCGTTCCCGCCGCTGCCCGGCGAGGGCGGCTCGAGGGAGCCTGGACAGGGGCTTTGGCGGGGAGGGAAAGCAGGCTCCGGAGTTCATCGT     | 8  |
| wt-53970-54090 | 4729 | CGGGGCTTCTGCTGCTGACCTGGAGAGGACGGCTCCAGAGCCGTGTGAAAGCCCGCCGAGTCTTCCGCCATCTCGTGGGCTTCCGCATCAGGGTCTGGCTCTCCCGACCTGCT        | 8  |
| wt-54090-54210 | 4730 | CTTCCAGCAGCCGACCTCGCCGCTCGGCTGGTCAAGCAGCTCCGAGAAGAATCCCCGTGGGCTGGAGGAGATCGTCCCGCTCTCGCTTGTACAGAGCTGGGGCTCTTAGGCC         | 8  |
| wt-54210-54330 | 4731 | AGAGCGCCGAGTCCGAGGCGAGCCTGGGCGGGCGGTTGCCTGGGGATAGTTGGAGGAGGAGGAGGTTAGCCTGGCCTGGGTCAATAGTGGCTCGGGTACGGTCCGATCCAGTACT      | 8  |
| wt-54450-54570 | 4733 | TGTCGGGGACTGCAGGGCTGGCGCTGTGCGGAGGGCCGAACGGATGGCATGGCCGCCCTCGTGGCGGAAAGAGGGCCCGGGCGCTTCTCCGCTCCTGCCCTCCTCCTCT            | 8  |
| wt-54570-54690 | 4734 | CTTTGGCGGTAGCCCGGGGGTGGCGGGCAAGCGTCCAGTCTGGCCAGAGGGCCGCTCGATATCCGTGAACAGCCGGGTTCCGCGCCCTCATTCTCCCGCGCACACCATCGT          | 8  |
| wt-54690-54810 | 4735 | CCACGAGCAGGGATCGCAGTCTCCTCCTCACCTCGTTATCCCAATAGCATAGCGCAAGGATCTGTGTAGGGAGTCAAAGATGTCCTGTTTCTGGCTACTGCCCGGCTGCTG          | 4  |
| wt-54810-54930 | 4736 | CCGCGGCTGAGTCCGTAATTGTGCTGACGAGGAGGCGCAGGGGTTCCAGTATCGGGCGAAGTGGGAGCGGGCTTGGGCGTGGCCCCAGCGCCCTTCCATTAATCTGGCCAGGGCT      | 8  |
| wt-54930-55050 | 4737 | CATTGCGCTCTCGGCTCGCCGCTCCTGCCCTCCTTGTCTTCTGCTTCTCGGAGTCTCCTTTTTCTTGCGCCGGTCCATAAGCTGCCGACGCTTCTTCTACTAGTGTGCTTGA         | 4  |
| wt-55050-55170 | 4738 | GCTCTTTGTGGGGCAGTGTCCAGAAAGCCCTCGAGCTGTTCTCCTGGTGGCGGCTTAAAGCTTCCGCTCCAGGCGCCAGGCTGCACCTCCTTGTCTGAGCTGATGTTGTTGT         | 4  |
| wt-55170-55290 | 4739 | TATCTTCAATTTCTGCAGGTAACCTAGGAAGCGTTTCTGAGCTCCTGGGATGAGCGTTTGGGAGAGCTGATTCTGCAGCCAGAGAGTAGTCTAGGGCATTCTCGAGCCGTGAC        | 4  |
| wt-55290-55410 | 4740 | CTGTGATCGTGCATCATAGACCCCAGTAGACCTGGGAGCAGATTACCAGCGCCGGCTCCTTTAAGGTCTGTGAGTAGCAAATCTGCAAGGCCACTAGGCGGCTGGCTCCA           | 4  |
| wt-55410-55530 | 4741 | GGCTCAGCGGTTGCCATCTCGAATGTGTCAGGCGCTGAGACCTGGGTCAGGATGGGCTCAATGCCATCGACCTCAGGGTCAAGGAGCCCAAGTACGATAGAGGTTGGT             | 4  |
| wt-55530-55650 | 4742 | CTATGCTCCTCGAAGGAGCAATGTAGTTATCGATGGTGTAGAAGGATGATTTCAGGATGTTTCATCAGGTAACCTTTTGGAGCGAACAATCGCTGTATAGTGTACAGTGGCGGA       | 4  |
| wt-55650-55770 | 4743 | TGTACGTGGGTTCTTGGCGCCGACTACGACCCTGCATTTGCGATGACTTTTCTATGACGGGGATGGTAGGGCCGGTGTGGCCAGCGGTGGCTGGGTTGTCGT                   | 4  |
| wt-55770-55890 | 4744 | GGTTGGCGGGTGTGCGAGAGGAGAGCGGGAGAGATGGGGCGCCTGGGGCCAGGCCACACCGGCCAGGCCCAACATGCCTCGATGCTGCCAGGATGGTGGGAGGCGCTTTCTGT        | 8  |

|                |      |                                                                                                                            |    |
|----------------|------|----------------------------------------------------------------------------------------------------------------------------|----|
| wt-55890-56010 | 4745 | TTTCTCTGGTGTCTCGAGCTCTTCTGTTTTTTTTCGCGACTGTCTCAAAGCTTGGGAAGGGGGGCAATGCTGGGGTCTCTCCCTCAAAGCTCGCTCCAGGGGCCAGGGGATACCGCTCATAT | 4  |
| wt-56010-56130 | 4746 | CACTAAGGGCGGTGCCAGGTAGAGGAGCTCGCGATAGTCCCATTCAATGGACGTGTACCAGATGTTTAGGAGAGCCAGGGAGGCCGATGATCTGGCATGTGTGCCAGGTTGTGTCAGGA    | 4  |
| wt-56130-56250 | 4747 | GGTCGTCAAAATCCATCACTGTTGGGAGGCTTGGGTCCTCAAGGTAGGAGAGATAATCGAGGCCGCCAGGGCCACCTTGCCCTGATGTCCGCCGTACACCTGCCGACGTGCAGGGCCG     | 4  |
| wt-56250-56370 | 4748 | CATTCTTGGACCGGACGGCCAGCTGTGGACAAAGGGGGGCACTGAGGCGCGGGAGGGGCCCCACTACTCTATCCTGTCAAACAGCGCCAAAAGCGGGACGTCCTCTCATCTACCCAG      | 4  |
| wt-56610-56730 | 4751 | CAGCCAGCATCTTAGCACCGGCTACACCGGACCGCGTCTCTCGTGGCCAGGGACGGCAGGCAGCCAGCTTTCGGCCAGGTGCTTATGAAACTCTCCCGCTCTCCCTTGT              | 4  |
| wt-56730-56850 | 4752 | CTGATAGCATGTTTGGAGTTTTGGGTTAAGTTCGGAAGTACGAGCTTCCAGGTCCAGCTGGGACGCTCGAGTGTCCGACCTCTTAAAGAACTCCAGCAGATTAGCA                 | 4  |
| wt-56850-56970 | 4753 | CAGACGATCGGTCCTACTCTTATTAGCCGCTGCTCGGAGCAGCTGTACAAAGAGTATGCTATCATCTGCTCAAAGGACCTGCTCCGCTGCGCACTTCCCGGTTAGAGGCCGGTCTAGA     | 4  |
| wt-56970-57090 | 4754 | CGATGGCCTGTCTGGTGGTATGTCGCGCTTCTCGCAATGTTGCTCTCGAGGGGACAAAAGTCCATCTCAGGAGTCTCTATGTCAAAGGTGGTCTGATAGTATTGGCTCTGGCGG         | 4  |
| wt-57090-57210 | 4755 | TGTCCAGTGTGATGGGGGACGTGGGGGACGTGATCCCGATCCAGGCTGTGGAGAACACTCATCTTCAAACATGTCTTCATCCTCTGTGGTGGGATATCGGAGGCTAAGTCCGCTCT       | 4  |
| wt-57210-57330 | 4756 | CCGCTTCTCAGAGTCGGACATGGATAGGAAAGGCTCCTTAGGTCAGACAGGTAGCGGACGAGGCCAGAACCCCAAGATGCATCATCCCAAAGGAGGGCTGTGCCGAAGGAGGGT         | 4  |
| wt-57330-57450 | 4757 | ATGGGATATCTCCGTTCCAGCCCTGTACGCGCCGGGGGATGGTTTTTTCTGGTTCGAGTGTCTGGTGTGATGGTGGGAGCTGCTGAGCAGGAGGAGAGCCGGGGTAGCTGATGGCA       | 4  |
| wt-57450-57570 | 4758 | GGGGCTGCTGCTGAGGAGGAAGAGGAGAAGGACGCCGGGCGCTGATGCGGAAGAGTGTGCTGAGGAAAGTGGAGAAGGAGCCGGGCGGCTGATGGCTGGGCTGCTGATGGAA           | 8  |
| wt-57570-57690 | 4759 | GAAGTGGAGAAGGAGCCGGGGCGGCTGATTGCGGGGGTGTGCTGAGTGGAGGAGGAGAAGAGTCTGGTGGTGGGGGCTGCTGTCAGTCGGGGAAGGGGATGGGGTGGTCAGAG          | 8  |
| wt-57690-57810 | 4760 | GGATTTTGGTTCGAGGGAGCTGCTGTGGCAGAGGGATGGTATTGTCAAAGGGAGGCCGAGGAGATGGAGTACTGAAGGAGCGATAGTTGAGACTGGCGGGGGTGGGGTGTGGGG         | 4  |
| wt-57810-57930 | 4761 | AGCGGGTGGTATTGGTGGGATGGGATTACTGGAGGGGGAAGCGAGCTGTGAAGGGGGCGATGGGCCGAAACGTTGGTGCCTGGCAGCTGATCATCCTCTGTGTGATGGTGG            | 4  |
| wt-57930-58050 | 4762 | AGGACAGAGGAGGCGGCGGCGGAGGTGGGCTTCTGGGGGCTATCTTTGCCAATCCCTTTCTCTGGGAGTCTGAGGCCTGCGCCGCTCAGCCCTTGGTGGCGTGGAGG                | 8  |
| wt-58050-58170 | 4763 | GAGCGGGACCCCGGGGGTGTACCTAGCCCGGGGATGGGGATGAAGAGGGGAGGGCTGAGGCGGGGCCCGGGAGCCGGGGCCGCGGAGGCCGGGGCCGCGG                       | 12 |
| wt-58170-58290 | 4764 | AGGCCGGGGCCGCGGAGCGGGGGCCGAGAGCCGGGGCCGAGAGGCCGGGGCCGAGAGGCCGGAGACGCGGGGGAGTTGGTCTTTGCAGGACTATACCTGGCGGAGGGAATG            | 12 |
| wt-58290-58410 | 4765 | AGTCGGATGTAAAGATCGAGAGGGCAGTGGCTGAGGTATACGGTATTATCGCCGTTCAAACGGTAGCATGACGGGAGGGCTGCTATCAGCACCGGGGCTCCCCGCCCTCCCCAT         | 4  |
| wt-58410-58530 | 4766 | CACTGGACACAAGCTCGGGCCACCAGGTCAAAGCCGCTGCCGTTGGCCTCAAATAAGTCATACACGCCATAGTGTCCAGCATAAAAGTGCGGGGTCCCTCTGTCTCAAAGGCCGCG       | 4  |
| wt-58530-58650 | 4767 | GTAGAAAATAGAGATGCACGCAAGTGTACTGGGCCCTGGTGCCTCCAGTACTGACGAGTGTGCTGCAGATAGTGTGCTGACTCTGACATGGCGGGGGTCCCGGGGCCCATCCTCT        | 4  |
| wt-58650-58770 | 4768 | GGCAGTGGGGTCAAACAAGTAGAAGGAGCTCTGTCTCATGATGTCGCCCGCGGTAGATGTCAGATGTAGAGGATGAAGTGGCCACCCGTTGTAAGTGGCGTGCAGGACT              | 4  |
| wt-58770-58890 | 4769 | CGGCCAGGACTGAAACACTGCCGAGTTTGGCATCTGGGACGGAAATAGACAGGCGAAAGATCTCCGCGAGCGGATATATGTCAGCGCCACCAGCCCTCAGGACACGGAGCTGG          | 4  |
| wt-58890-59010 | 4770 | GCACGTCCTCACTGGCCATCTCGTCCCTTAGGATGCCGCTTGGCGCATGAGGGCATCCAGCCGCCCTCGTCCAGGACCTGTCAGCTCAGGCGGGAGGTCAGGGGGC                 | 8  |
| wt-59130-59250 | 4772 | CCGAGCCTCACTCCCGCCCCGGGGCATTACATCCATGTCTGATTCCGCGCAGGGGGCCGGTTCCCGGGTGCCTGGCTTTGCCCCAGTCCCGCTTACTCATCTTCGGCGGTG            | 8  |
| wt-59250-59370 | 4773 | GGGCGGGGAGGACGCTTGTGCCCCCTTCTGGTCCGGGGTCTTACGCGGCTGGCGGGCCGAGCCGCGGAGAGATAAGGGGGTACGTTGTGCTCCGCTCCTCTGTCTGGCCG             | 8  |
| wt-59370-59490 | 4774 | CCCGCGCCGCTTCCCGCCTTGAAGGAGAGGGGGTAGTCCCGGACTCGCTGCGGGGAGGAGGCTCAAACCTTGGGCTCGGGCCGGTGTGATATCCGATGGCTTCCCTG                | 8  |
| wt-59490-59610 | 4775 | TCTTCTCGTATGCTCCTCTCTCCCTCCCTCCCGGACCGCCCTGAGATCTGCCCTCCCTCCCTCTCCCTGCTGCTGGTGGGAAAAGTCTGAGGAGGAGAAGGAGAATGGGGAGGAGTCC     | 4  |
| wt-59610-59730 | 4776 | AAAACGCGACGCCACTGCCGTGGGGCGGTGGTACAGGTCGCCGCTGGCCCGCGCTTGTCTCGCTTCTGCCGTTACCCAGGAGAATGGCCGCGATTTTTGGCGGGGAGGATGCGG         | 8  |
| wt-59730-59850 | 4777 | AATGGCGGGGCGTGTGTCCACGGGTGAGGGGGAATCGTGGTATAGGGCCGGCACAGAGTGGTGGTCTGACCCGGGCGTGCAGCAAAGGCGGCCGAGAACCGAGGGGCTTCTGGGG        | 8  |
| wt-59850-59970 | 4778 | GTGACTGTGATCTGTTCCGATTTAGGTCATGGCGGGTGTGATGTTTTAATAGGGGTGGTCTTGGCGGGCAGGATGATGGTCGAGGACGTCACCCAGGGCCTTGAGATGCTCTTG         | 4  |
| wt-59970-60090 | 4779 | CCTAGATACAGGATGTCGTCCATGCTGAGGGGAGTGGGTGTCTGCTCCCTCCGGAAGCCGCTGGTGGCGGGATGAAGACAGTGGTGGGGGGGCTCTCGCGGACTATGGCC             | 8  |
| wt-60090-60210 | 4780 | TGGGCACGCTCGCGTGCATGGCGGGTGGCTGGAACAGCGGGGCAATGTGTAATCCCGGAACCGGTAGGCGACGCTGCCCTGAGGGCGCCGTCAGGCTGATCCAGCTCCAGGGCG         | 8  |
| wt-60210-60330 | 4781 | TGCTCCACCCTCGTGTGAGCTCCTCGAGATCCGAGCGAGGGGCTCGTGGTGTGGGCCAGAGGGGGTATCCGCGATGCCCGGCTCCTCTGAGGGCCGCGACAGGAGGGCCCTT           | 8  |
| wt-60330-60450 | 4782 | CTGAGGGTGGCGTGTGGCCGTGGCCAGGGCCACCTGGCGGGCGCTCCCGCACACATCTGGATGCCCTCCAGCAGCTTTTAGCGTCTGGAGTCCGTGGAGTAGTGGCGGGG             | 8  |
| wt-60450-60570 | 4783 | GAGGATGAAACGCTTTTTCTTACCAGCTACCACCCCTCCTCTCTCCCTGCGCCAGAGGGATCTGCACCCCTCCCGGCTCTGCGTCTGACAGGAGCGGGCGGGAGCACAGCCTC          | 4  |
| wt-60690-60810 | 4785 | GAAAAGAGGGAGGTGGGCCAGGCAAGCGGTGGTCTCCGCGCCCGCTGAAAGTGTGATAGTCTCGGAGATGATGCCTGAGACCTCTCGGACGGCGTCCATGATCTAAGGACTGCG         | 4  |
| wt-60810-60930 | 4786 | TCGTGGGACGACAGCCCGAGGGGCCCGCCCTTTCCTGCTTCTGCACCCCTCGCTCCTGCGTCCCGGGCTTCCCTTCCCGCTTAAAGTTAGGGGGCGCAGTCCGACCGCTGGGG          | 8  |
| wt-60930-61050 | 4787 | GACTCCCCAGGCATCGGAGGGGCCCGTACATAGATCTCCAGACGGTGGCGTATAGAGCTCAGAGGACGGCGGGCCGGTTCAGCTCGGGGAAAGGAGGGCCAGGTGCTGCCAAG          | 8  |
| wt-61050-61170 | 4788 | GAGACCAGCCAGCGCAGGGCGCCAGAGAGCGGGTTTTGGGACGCTGTTGGAGAGGACCCGGCGAAGGGCGGGCCAGATTTGGAACGATGAAAGGGCGCCGGGAGAAAGGGCTGTGG       | 8  |
| wt-61170-61290 | 4789 | ACATAGGCCGGATCCGCGCGCGCTTTGGCCGGCCCTCAGGGACCGGCAATGTCCTGACGCTGTGTCGCGGGGCGCCGCCACCGCTGCCCTCCTACTGCTCTTCTCCCTGCTCGCCG       | 8  |
| wt-61290-61410 | 4790 | GGGAGTAGGGGGGGCTTACAGGGGAGGGCCGAGCGGGGCGGGGCTGCCACAGCGGGCTGTAGCGGACCCATAGCAGAGACCTGAGGAGTTGGGATGAAAGGTCCTCCCGCCACCTGC      | 8  |
| wt-61410-61530 | 4791 | TCATACTCGCCCGGGAGGGGACGATGAAGATGCGGACGAGGGGTTACGGCTGCCAAGGCTCCCGCGCCACCCAGCAGCCGTCGCGGGGGGGCGGGCGGGCGCGGTAGAG              | 8  |
| wt-61530-61650 | 4792 | GGCCGCTGGTGCAGCGGCTGCTGTCACGGCCTCGGCTCGCCCGCAGGTAGCGCCCGGGCCACAGGGCGAAGCGGCTCTGTTGGGCTCGCGGTGGGCGAGCTCGAAAAAG              | 12 |
| wt-61650-61770 | 4793 | TGCAGGGCAAAGCCGATAGACTCTTAGGAGGGCGCGGTGGCTCGAGCCACTCCACCGGAGCGGGACACCCGGGGCACAGAGCCAGCATCATGGCTAGTCCCGCCACGGTC             | 8  |
| wt-61770-61890 | 4794 | TCGTTGAGCCCGGCCGAGAGCAAAAGCTGGCCACCTGCTGATGGCGGTGGAGAGAAGGATGCCCGCTCCCGCCGCTCCGACACAGAGCGCCAGGGCTCCATCTGCGCCG              | 8  |
| wt-61890-62010 | 4795 | ATCCCGCCAGGAAGGCTCGATGACCGAGTCTGGGACCGGTAAGTGTGTCGAGGAGCGGCTCGTACACATAGTCGTAAGAGGCGCCCTGAGGGCTCAAAGGCGGGAGCCG              | 4  |
| wt-62010-62130 | 4796 | GCGCGTCAAAGGCCAGGACGGCGACAGCCGCGAGGGGGCTTTGTCCCGCTGGCTCCGCTGCGCTCACCCACAGTCTACAGCCCGCCGCGGGCCAGGGCGAGCCGAC                 | 12 |
| wt-62130-62250 | 4797 | ACGCTGGAAGTACTCGGGCGGTGAAGAAGACACCACCGCTTCTTCCCTCTCCCGCGGGCCCGCCCACTGTGCTCCACAGCTCCACGGCCATGGCCCTGATGCTCCGCG               | 8  |
| wt-62370-62490 | 4799 | TCCCGCGGAAGGCTCCACCGGGCCAGATAAGTGTCCGACCCAGCTCTCCACGAAGGCAAGGTGGCGTGGGCGAGACCCGAGCAGCTCCCGCTGCCCTCTTGATGATG                | 8  |
| wt-62490-62610 | 4800 | CGCCGATACGCGCCGAGGGCCGGTCTGTGCGATGAGCGGAGGCGCTCCAGCGGATCTGCTGGCGGAGAGGCTGCTGGGGGGCAGTGGATGCCAGCAGTCCAGGGCC                 | 8  |

|                |      |                                                                                                                            |    |
|----------------|------|----------------------------------------------------------------------------------------------------------------------------|----|
| wt-62610-62730 | 4801 | GCCTCCAGATGGCCGAGGCCGAAGCTGCGCCTGGAAAAGGAGGCCGCCCGGAGTAGTGTAGGCGTGGTGGGGAGGACCGCCGCCGGTAAAGCGTGGCCGCTCATGAGGGTGAGAGTA      | 8  |
| wt-62730-62850 | 4802 | TTTTAAAAATCGCGCACACAGCACCGGCTGGGCCAAATCCCCAGTCCAAAGATCCCCAGCTCCAGAGGATCAGCGCGCGCAGCGGGCAGCGGGTCTCCCCAGACAGCAGAACTGA        | 4  |
| wt-62850-62970 | 4803 | CGCGTCACGCGGGCGAGCCCCCGTCCACCTCTGCCAGGGTGGCTGGGCGTCTGCCCTCCGCTACCGCCGCTGCTGTCACTCTCCATAGCGGACGCCATGAAGTCCAGGGTCCGTC        | 8  |
| wt-62970-63090 | 4804 | GATCGCCGCCGCTGTGCAACGCCGAATCGCGGGGCTGCTGCCCTCCGCGCCCGGCTAAATATTTCCCGGGGTCGGAATTACAGCGGGACGTTCTGGGCGTGTGGAGAACACGCG         | 8  |
| wt-63090-63210 | 4805 | CAGGCTCTCTCGTGTAGTGGCGGCGGCTGTCGCGCGCAGGGCTGTGCCGCCGGGGAGTGGCGGTCGCGGGGGTGGCAGTGGAGGGGGGAGCTTCAGCTGGTCTGGGTGGCGGCCG        | 12 |
| wt-63210-63330 | 4806 | CCAGTCTTTGGGACTTTCTGATACACGCCAGTCTTCAACAACGCCGAGGCCACTGGAACGGCCCTTTTCAATTAACAGCAGATGACCCGTTCTCGGGCTCGACCGCTATTCACT         | 4  |
| wt-63330-63450 | 4807 | CTCTCTCCCTGTTTTATCTTAATGATCACGGCCGGTGTAGCCGCGCGGCTCCCGGCTGAGCGGATGGCCAACTGCTGTACGACAGCCCGCAACCTGCTCTAGACTAA                | 8  |
| wt-63450-63570 | 4808 | CTGGTCCCCGACTTTGGGCGGCTGGTGGCCGACCGCCGCTTCCACAACCTCATCACCCCTGTGGGCCCTGGTGGAGAATATAAAGAGCACCTATCTGAATAAAATCACCACGGTGGTC     | 4  |
| wt-63570-63690 | 4809 | CACGGGCTGTGGTACAGCAAGGCCATCCCTCGCAGCACCCTCAAGGTGACGGTGGCCGAGGAGGCTTGTGGATCTGGACGCGTGGCTCTCCGGCGGCAGCGGGGTGGCGGTGGAGTA      | 8  |
| wt-63690-63810 | 4810 | TGCTTCGTCGGGGGGTGGCCCTGCAGCCGTCGCCCGCCGATGCCGCGCTCTATGTCGCTGTACCTATGAGGAAGCCGGGCCCGGTTTACGTTTTTCCAGTCTCCCGGCCACTGT         | 8  |
| wt-63810-63930 | 4811 | CAGATCATGAATATCTTAAGAATTTATTACTCACCATCATGACCCTGCTGTGGTCCAGCCCTACATATAGAGGAGTAACTTTCCGGGCGGTTGCTGTCTGGGACATTT               | 4  |
| wt-63930-64050 | 4812 | AGTGCTACTGACGGTTGGAGGAGTCTGCTCTCAATTACCCTAGCTGCTAGCTGCTCCCGTGGTGGAGATTCAGACTTTTTATCCAACTGCTCTGACTGGAGGGTATTCTCTAGACTAA     | 4  |
| wt-64050-64170 | 4813 | CGGGAGGAAACAGGAGGAGGGGGACAAGAGCACAAGGTGTTGTTAGTGGACACCCACCACACAGCATGGCAACGACCACTGTCGAGCATGAGCTCCTTCCAAATTGATTGATG          | 4  |
| wt-64170-64290 | 4814 | AGTTAAAGGTCAAGGCCAACTCAGACCCGAGGGCTGATGCTCGCCGGGCGCTGCTCCACCGCTTAAAGCCGAGTCAAGTTACACACACAGTAGCCGAATATCTGGAGGTCTTCTCTG      | 4  |
| wt-64290-64410 | 4815 | ACAAATTCACGATGAGGAATCTCCAGATGACCCGGATGAGCTGGAGACCCGAGTCTGCTTTCGCGCAGAGCCGGCCTACGAGCGCATGCTCTCCAGCGGCTACCTGTGGCC            | 4  |
| wt-64410-64530 | 4816 | TGCGCTACTATGACACCTATCTGATGTGGGGCAGCGGGAAGCAGGAGGTGTGACACTTTTACATGCGTTAGCCGGCTTCTGTGCCTCAACCACCTGCCTCTACGCGGGTCTCA          | 4  |
| wt-64530-64650 | 4817 | GGCAGCCCTGCAGCGGCCAGCCGGAGATTGAGAGTGACATGGAGGTGTTTGAATTACTACTTTGAGCACTAACTCCAGACGGTGTGCTGTCCAGCCCTTTATCGCGTTTGGCCG         | 4  |
| wt-64650-64770 | 4818 | GGGTGAAAACTCCACTCTGGCCAGCTGCATCTCACACCACCCGACCTCAGCTCCGAGTGGACGTGACCCAGGCGCTTATAGGCACCTGGGGCGTACCTCTTTCAGCGAGCCGGG         | 8  |
| wt-64770-64890 | 4819 | TGGGTGTAGGGGTGACGGGGGCTGGCCAGGATGGGAAACACATCAGCCTCCTGATGAGGATGATCAACAGCCAGTGGAGTACCACAATATGGTGAAGAGGCGCGTCAAGTGGCGG        | 4  |
| wt-64890-65010 | 4820 | CCTACATGGAGCCCTGGCAGACCCAGATTTTCAAGTTTTTGA AACGAACTGCCGGAGAACCACGAGAGTGGCCGGGCATCTTTACGGGGCTCTTTGCCCCAGCTCTTTCAAGC         | 4  |
| wt-65010-65130 | 4821 | TTTTTAGGGACACGCCCTGGTGGACTGGTACCTGTTTACCCCAAGGACCGGGGACCTGGAGGGCTCTACGGGAGGAGTTTGAAGCGGAGTACTATCGGCTGGTGCAGCGGGCA          | 4  |
| wt-65130-65250 | 4822 | AGTTTTGTGGCGGGTCCATCAAGTCTGATGTTCTCTATGCTCAACTGGCCGCTCAAGGCGCCGCTGACCCCTTATCTTTCGAAAGGAGGCTGCAACGCCACTTTTGGCCGACC          | 4  |
| wt-65250-65370 | 4823 | TGCAGGGCAGGCCATGAACGCCGCCAACCTGTGCGCGCAGGTGCTGACGCCCTCGAGGAAGTCTGTGGCCACTGCAATCTGGCAACATCTGCCTCCCGCGCTGCCTGGTGAATGCCG      | 8  |
| wt-65370-65490 | 4824 | CTCTGGCGGTGCGGGCACAGCGGGCCGACACGCGGGGATGAACCTCCTGCTGCCCTCCCTGACTCTCAGTCACTACCTACCTGGAGAGGGGCGAGTGGTGTGATTTCTCGTAGCC        | 8  |
| wt-65490-65610 | 4825 | GCCTCAGAGATGCCACCCAGTGTGCCACCTTTTGGTGGCCTGCTCCATTCTCAGGGATCCCCACTTATGATTCCAGGGATATGGCCTCCATGGGCTCGGGTGCAGGCGCTGGCCG        | 4  |
| wt-65610-65730 | 4826 | ATGCTTTGCGGACCTGGGCTGGCAGTACACTGACCCCTCCTGCTCGTTAAACAAGGAAATATTCGAACATATGTACTTTAGGGCCCTGCAACCACTAGTCTGATTGGACTTACA         | 4  |
| wt-65730-65850 | 4827 | CCAGGAAGATTTTTCCGGGTTTCAAACAGAGCAAGTATGCCGGGGGTGTTTCACTGGCAGATTTGGGCAGGAACAGACTTTTCTATCCAGGAAATTTGGTCTCGCTCTCTGAAC         | 4  |
| wt-65850-65970 | 4828 | GCATTTGAGGGATGGGCTTTTCAATTCACAGTTTTATCGCCCTGATGCCCACTCAGGCTGTGCCAGGTGACGGGCTGTTCCGACGCTTACCCCTCTATGCCAATGCCGCCACCA         | 4  |
| wt-65970-66090 | 4829 | AGGTCACCAACAAGGAGGAGGCCCTTAGGCCAAACCGGCTTTTGGCGTATGTGCTGTGGATGACAGGGAAGCTTTGAATCTGTGCGGGGGCGTGTCTCCTGCCTCCCGGAGGCTC        | 4  |
| wt-66090-66210 | 4830 | TGCGGAGCGCTACCTGCGTTTCAAAACGGCCCTTGATTACAACAGGAGGACCTGATTCAGATGTCCCGGACAGGGCCCTTTGTGGACAGAGCCAACTCACAGCCTGTTTTTGC          | 4  |
| wt-66210-66330 | 4831 | GTGAGGAAGATGCCCGCGGGGCCAGCAGCTAGCCAACCTACTGGTGCAGCTACGAGTGGGCTGAAGACTATCATGTACTATTGTGCGATTGAGAAGCGCCCGATCTGGGGTGA          | 4  |
| wt-66330-66450 | 4832 | TGGAGTGAAGGCCAGCGGCTCTGTGCTGCCCGGGAGGAACAGAAAGTGGAGTGGCAGGTCGGCTGAGCAGATCCCGCTGTCCATGGAACCGCGCAGTTGGCGGGCCGTTGACA          | 8  |
| wt-66450-66570 | 4833 | TCATGAGCAAGGGCCAGGGGAGGACCAAGTGGGTGGTGTGCCCGGGGATTTGAAGTGTGCTATAAAGTACCGTACGCTTCTCAGAGGATGATCTGTTGGAGACTGACGGTTTTA         | 4  |
| wt-66570-66690 | 4834 | CTGAACGAGCCTGTGAATCTTGCCAAATAAAGCTTTATTGCCATGTCCAAGTTGTTGTACGTCGCTGATCATGAGGGCTTTGCCCTGCCTAACGGTGCAGAACCCACCGCAACCCTGGTTCG | 4  |
| wt-66690-66810 | 4835 | CGGCTCACATTTGCTCCTACCAAGGACTGCGGGTGTCTCAAGTACTCAATGAGAGGGACTTGGAGTTTTACAAGTTCCTTTACGTTCTGGCCATGGCCGAGAAGCTTGTGAACTTTA      | 4  |
| wt-66810-66930 | 4836 | ACATTTGATGAAGTGGTACCAGCTTCGAGAGCCACGACATTTGATCACTACTACACCAGCAGAAAGCCATGGAGAACCTCCAGGGGAGACTTATGTAACATTTAAACATGCTCTTTG      | 4  |
| wt-66930-67050 | 4837 | ATGGGACAGGGCGCGATGAACGCCATCAGCAGAGGCCATATGGCCGAGGCGCTGCAAGCCAAGATTTTCTGGCTCCGTGACAAGGTGGCGGGCCGCTCACCTGCCGAGAAGA           | 8  |
| wt-67050-67170 | 4838 | TTCTTGTTTCTGCTGATTTGAAGCATTCTTCAATTAGCTCTTCTACAGCATAGCCCTGCTGCGGGTCCGGGCGCTAATGCCTGGCATCTGCCTGGCCAAATAACTACATAAGTAGGG      | 4  |
| wt-67170-67290 | 4839 | ATGAGTGTCCACACCCGCGTGCCTCCCTGTTATAACAATAGCATGACAGCCAAGGCTGACCGACCAAGGGCCACTGGATCCAGGAGCTGTTTTCGACTGCGGTGGAGGTAGAGACTG      | 4  |
| wt-67290-67410 | 4840 | CCTTCATCGAGGCTCGTGGAGAGGGGTTACCTTGGTGGATGTGCGAGCCATAAAGCAGTTTCTGGAGGCCAGCGCGATCGCATCTGGGTGACATTGTTGTCAGGCTCCCTTGTATGGCA    | 4  |
| wt-67410-67530 | 4841 | CACCAACCCCAAGGACTGCCCGCTCACCTACATGACTAGCATCAAGCAAACTAATTTCTTTGAGCAAGAGATTCGATACACCATGCTGGTGTAGATGACCTTTGAGTCAGGGTGG        | 4  |
| wt-67530-67650 | 4842 | CTACTTGCTCAGTTTTCTGGGCAATAATCTCCTGCCTGCCTGCTGTGGTACGTTGGCTTCTGCTGCTGTTGTGATCATGGAACCACTCAGACTCTCCGTTTAAAGCAAGGCC           | 4  |
| wt-67650-67770 | 4843 | TAGCCGCTCTCCAAAGTGCATAGCAGTCCAGACTCATCTCAAGGAGGAGTGTGAGGTAACCTCTGTCTGTAACACTATGGAGGCCCGGCTGGCCCGGCTGGCCAGCCGAG             | 4  |
| wt-67890-68010 | 4845 | CCTGTGCTGGGCAAGGAGCTGTTGGCTCGGCTGTGGAGCAGGCTTCCCTGCAATTTTACAAGCGGCCACAAGGGGTTCCCGGCTGAATTTGTTAAGCTCACTATGGAATATGATG        | 4  |
| wt-68010-68130 | 4846 | ATAAGGTGTCCAAAGAGCCACACCTGCGCCCTGATGCCCTATATGCCCCGGCCAGCGACAGGCTGAGGAACGACAGATGATTGGCAGGTGCTGTTGATGCCAAGAGCGCTTCT          | 4  |
| wt-68130-68250 | 4847 | CGTTGCAGAGTGGGACGCCAGCAAGCTCAGCGCGGCTTAAAGTGACACTCAATCCGGATCTCTACGTCACACGATATACTTCCGGGAGGCGCTGCCTCACCTAGACTACAACCTT        | 4  |
| wt-68250-68370 | 4848 | TGAGTGTGGGGCCATACGAGGCCCTTCACTGGCCCTGAGGCTCAGGACGTTGGGGGCGTTGAGGCCACGTTGTCTGTCTGGTAGCAGCGGACTCGCTGGCGCGGCTTAGCC            | 8  |
| wt-68370-68490 | 4849 | TCTGCGCATCCGGCCGTTAGCGTGCCTTTGAGGTTTTAGAGGCTTGGCATATAGCTGTTGGCGCGGCTGCTGAGCTCAGCGGGGACCTGCGGCTGGATTTGATCTTAGTGTTATTT       | 4  |
| wt-68490-68610 | 4850 | TATTTAACCAGCCTCCGAAGAGCGCGCGGCAAGTACGCGCTGTAGCCAGAGATAAAAGTCCCGGTTGCAACCACTGGGCAACAGGACTCCAACAAACGCCCCAGACATACGGTCAAGT     | 4  |
| wt-68610-68730 | 4851 | CATCTCTTCACTCCGCCACCTCTAGGACCCCTACTTTGGGAGAGTCCGGCAAGGCCAGAGACACCTCCTGCTGCCATTCCAGGCCACTCCAGCAACACCGCACTGGAGAGGCTCTGG      | 4  |
| wt-68730-68850 | 4852 | CTGTTACGCTCGCGAGGAAAAGGACATGCTCGGAGGCCAGGCAGAAAGCAGCAAGCACCCCAAGAAAGTGAAGCAGGCCCTTAACCCCTCATTTAACACCATGTTCTCGTGAAGCAGCAC   | 4  |



|                |      |                                                                                                                                        |   |
|----------------|------|----------------------------------------------------------------------------------------------------------------------------------------|---|
| wt-68850-68970 | 4853 | CTGTCCCTGGGGCCGTGTGTCTCTGTCTCGGCCCTCCTGGCCAGCACCCCTTCATTTGGTGTCTTTTGGCAACCTGCTCTCTGGAGATCTTCCACCGTGGCAGACACACGTG                       | 4 |
| wt-68970-69090 | 4854 | TACAGGCTTGGATTCCCGACGCGATGCCTAATGGCCGTCCTCTGACGCTGGTACCCGCAAGCAGCGGTGAGGGCCGTCACCTCCAGCCATCATGCTGAATATTGCCAGCGCCTTGATC                 | 4 |
| wt-69090-69210 | 4855 | TTCTTCTCCCTCAGAGTCTACTCGACCAGCACGTGGGTTTCTGCCCTGTCTTTCTGGCCAACCTGCCTCTTTATGCTGTGGCCCCGGCTGGCCATCGAGATTGTTACATCTGC                      | 4 |
| wt-69210-69330 | 4856 | CCGGCTATACACCAAAGGTTCTTTGAACCTGGTGTCTGTGCCCTGCACCATCTTTGCCCTGTCCGCTGCTCCAGGGCCCTGGAGGTGTGGCTGTCTTATGCTCCATTTTTCATC                     | 4 |
| wt-69330-69450 | 4857 | TTTTGGCTTTGGGCTCTGGAAGCCTGGCCGGTGTCCGGTAAACAGATTTACACCTCGGCTCTCGAGCGGAGCAGCAGCATTCTTTCGCCCGGGGAGATCATTCCGTTGGCATCCCTG                  | 4 |
| wt-69450-69570 | 4858 | AAGGAGCCCTCCATAAATGCCCTGGGATCTGCGGCATCTCCTGACCCTTCTGTCGTGTGTGTGATGATTGTTGCATGTGCACGACAGGTGTTCTTGGACTCTCTAGA                            | 4 |
| wt-69570-69690 | 4859 | TACTGACCTCTTTCTGTGTGGGGCGATGGCTCCGGGGGCTGACCTGCCGGCTTCCAGCATCTTGCATGTGTGCATGGCCACCCTCTGCACCCTGACATCTGTGGTATATTTTC                      | 4 |
| wt-69690-69810 | 4860 | CTCCATGAAACCTTTGGACCCTGGGCAAGACCCTGCTGTTTATCTCAATCTTTGTCTATTACTTTAGCGGGGTAGCGGCCCTGAGCGCAGCTATGCGCTACAAGCTTAAAGATTTGTG                 | 4 |
| wt-69810-69930 | 4861 | AACGGACCCTGGTCCATCTCCGTTGTTATACATGTGCTGTTTGTCTTACTTTTGTGAATATCTGTTGGTGACATTCATTAATCCTAACGACCGGAGTCCGTCTCTTTGTGTTC                      | 4 |
| wt-69930-70050 | 4862 | TTGGGGGACTTGTAGTTAGCTGTCTTCTCTTATTACATTTGGGTAACGGGAGGAAATGAACCCAGGGGTGGCAGTGGATGGGGTCAATTTATGGGCAAAACTCACAGGACATGTTGGGG                | 4 |
| wt-70050-70170 | 4863 | AGTTAGCATTGGCGTCGGGAAACACAGCTGGCAGTTAATACCAGCACAGCTAACAGGACATTTTGGGGAGTTGGCATTGGCGTCAGGACACGGCTCTGTAGTTATCACCGTAC                      | 4 |
| wt-70170-70290 | 4864 | CATGAGTCCCATGTGTCCAGTCCATTAACCCGTTCCCTCATTTTGTGTGCCCTCAAATGTTCCAGAAAGTCCAGAAAGTGGCCACAGGGGAGGTGGCTGAATTAGGGCCCTTTCCCTCATCCCC           | 4 |
| wt-70290-70410 | 4865 | CATGAGACCCAGTGGCAGGCTAGGGGCTACATTCGCCCTCCACGTTTCCCTTCGCGTGAGGCATCCGATATGACTGAATTTTCGACGTCTCTTTCCCTCTCCCTGTTATTTCCCAT                   | 4 |
| wt-70410-70530 | 4866 | AGAATTACAGTGAGGTTACACAGGTGGAGATTCAAGTTAACCATTATTGATTAAATCCAGGAAACAAAACAGTCTAGTGACCCAGTGCCCGGAGAGAGAATGGCCCTGACAAAGTCGG                 | 4 |
| wt-70530-70650 | 4867 | CTGCATGATGCACCTTCGGCAGTACAGTGTGTGAGTCTCCACGGCTCTGTCAAAGGGAGCTTAGCGTGCACAGGTTGTAATTTCTGATGTAGTGGCCAGGAATCAACTTCATCGTGT                  | 4 |
| wt-70650-70770 | 4868 | CTCCGCTGCAGTTGGCGTTAATGTAGGCTGGGCTACTGCCGATATGCTGCCAAGAGACAGAGGGGCTGTTACATATGAGCTGCTCAGGGTCTCCACCACCTGTTTTCAGCGGCC                     | 4 |
| wt-70770-70890 | 4869 | GTGGCACAGGTGATGTAGAAGAGTTGCTTCAAAAGTTGATGTCTCGCGTGTAGGAAGGAAGCAGGGTCCGACGTCTTTGAGCTTGGTCAGGATCACCTTGAAGACTCATGGCCGAG                   | 4 |
| wt-70890-71010 | 4870 | GCCAGGAGGATGCTTCCGCGGGAGCTAGGGGCAGGTCCGCGTGGTAGGTATCTCCTGGAGCCAAAAGATGGTCTCTTAGCATGGCCACCAGGGTGCAGAGCCCGCGTCTGGATC                     | 4 |
| wt-71010-71130 | 4871 | GCCTGCATGCGTGCATCCAGCCATGTGCTTGTGTTGTTGACTTGGTGAAGAACTACAGTGTCTTGTAGCTCTGCGCAGCTCGTGTCTGGGTTGCACCTTCTGCCAGGCTCCAATC                    | 4 |
| wt-71130-71250 | 4872 | TCTGGATGGCCGGCCACCGCCAGCATCGACTGTAGGAACGGGCTTGGATGGGCTTAGGGTACAGAGGCCAGGGGGCTGGCAAGGTCACAAATGTAATCTTGAGACAGGGCTTAACC                   | 4 |
| wt-71250-71370 | 4873 | AGACTCATGTCAAACACGGTGTGGTCGGCAGGGCCCTGGCTGCGTCTTGCCTCGCCTGCTCTTGTGCTCTGCCGGCCCTCGAGATTCTGACCGGGGACCTCGTGTGCTGTG                        | 4 |
| wt-71370-71490 | 4874 | TTGCTTCCGGGAGCTCTTGGAGACCTCGGCTCTAGGGCACCTGGGGCCCTTGGGCTCTGGGGCTCTGGGGCTCTTGGCTTCCCGGCTTCCATAACTTTCATCGGTGCAG                          | 8 |
| wt-71490-71610 | 4875 | CCATGGACCTCTCCGCGTCCGCTTTTGTGGCTCTGGTGAAGAGGAGTGGCAGTCTCCTCCTTCTGCTCCTCGTCCCTGCACAGGGGTGAGCGATGCAATGTGACTGTCTTGTCTGT                   | 4 |
| wt-71610-71730 | 4876 | AGGTCCACTTCTTTCTGGGAATCAAAACGATGCCAGGTAGGGGTTATACCAGCTGGAGGGCCGTGCAGGATGCGGTGGCCGGAGTTGGATCTTATCCTCCTCCTCTGAGGAT                       | 4 |
| wt-71730-71850 | 4877 | GAAATCTCTCCATCTGTGGAGTGTCTTCCGCTGCCCTCCATAGGGTCCAGATCGCAGTCTGTGTGGTGTCTGAGACCGCTTCCAGTTCAGAAATGGCTCTCTGCAGAGGGGAGACAA                  | 4 |
| wt-71850-71970 | 4878 | AAGGTGGAGACTGCCCTTGGACACCTGTGCTCAGGCACCCGGATGCCCCGGCTCCACGGCCCGGCCACTGGCCGGTGTAGCTTCTACCTGCCGGATCCTCGTGGAGGAAATGCTGCT                  | 4 |
| wt-71970-72090 | 4879 | AGTTCCGGGAGCTCTGAGAAGAACCATCTTGTGTCTACGACGGGCTAGCTGGGATGTAGTGTCTTGTGACTGGCTCAGCCCTATTTATGATTCTGGAGCCGGGCACGCTGA                        | 4 |
| wt-72090-72210 | 4880 | TGGAGAAATGGGCGTGGTGTATTGGCCCCACAGCAGCCGCGAAAGCCTTCTTTGATCTTGTAGCAGATGCGGCCAGGCGAGGCGGCTTAGGCGGCTGATGTGTAGTAGAGTACCAGAAACCCCTCACATTCTGG | 4 |
| wt-72210-72330 | 4881 | AGCTGGCCTGTGGGATGCTCAGGCACGCAAAGTTCTGCCCGGGCATGGCACACCTGAACCTAAGTTGGCCCGGTTGCTCAAACGTGACATGGAGAACTGGGGAAATTTGTCTT                      | 4 |
| wt-72330-72450 | 4882 | CTGGCACAGCTGTTGCCAGGCTGCTCATGAGCGAGGGCCAGATGCAGGAGCTGACCCAGGCAGCAGATCCAGGCCAGATGCCCTCTATCATGGCCAGACATTCTCCACGGTGGGGG                   | 4 |
| wt-72450-72570 | 4883 | GCAGGGTCTCGCGGCTCCTGGATTAGATAGTCAAGCCCATCATCCGCGATGGTAGCAGAAGTTTTGGGGCCGGCCAGCCACGTGCAGTGAGTGTGAAGAGGTTTTGAATGT                        | 4 |
| wt-72570-72690 | 4884 | TGAGGGCATTCTAACATAGCTGTGCTTCTCTTCCGATGACAGACAAAGAGCCGACGTGCCGGTAAGACCACCGCCCTGTCCACCTGTAGGTATGCGGCAGCCGGATGC                           | 4 |
| wt-72690-72810 | 4885 | ACCGCCCGGCGTGATACAGCAGCTGTCAAAGAGCCGGCCCAATCTTTGATCTTGTAGCAGATGCGGCCAGGCGAGGCGGCTTAGGCGGCTGAGCTTCTGCAGCACAGACACAAACC                   | 4 |
| wt-72810-72930 | 4886 | CTTGTACTGCGCTTGTTCACCAATAGCATGGCTCTAGGTAGGGGGTGATGACGCGAAAGCCAGTTTTCCCGTGCATATGCAAAAGGGGAGCACATCTTCCATATTATCCGGTTCGG                   | 4 |
| wt-72930-73050 | 4887 | CGGGTGGACAAGCTGATTTGAAAAATAGACTGGTGGGCCCTGGACACTGGACCCAGCGCGCGATGAGGCGCAGTACCTCAGGCCGACGGTCCGGCACAGGTGATAGATTTCCTCCA                   | 4 |
| wt-73050-73170 | 4888 | GCGACAGGGGGCCCTTGTATCTTATAGATCCAGGTCCAAGACCAGTTGCAGACCAGGAGCCGGGATTAAGTATTATGCCGGGAGACAAAGAGCTGCTCGCTCAGGCTGTTCTGTG                    | 4 |
| wt-73170-73290 | 4889 | AATAGTACACTGGGGTGTAGGAGAGGGCCCTGGTAGACAGTGTCTGGGAGGCGGAGTTGGTCCGGTGGAGACGACTCCGCCAGTGGGATGAGAAGGGGTGACGGGCTGTCTATTA                    | 4 |
| wt-73290-73410 | 4890 | CAAAGTAGTGCCTGTCTGCAAAATGGCAGAGGAAGACCCTGAGCCGCTGCACCCTTCGAAGGACCGTGGTGGGAGGAAATTTTCTTGGGATTCCAATGGCCCGGCGAGGTGGCTTGGC                 | 4 |
| wt-73410-73530 | 4891 | CGGCAAGCATAGAAACCTTGAAGCGTGGGGGGTATGTGGGACCTCATCCGCGTGCACGCGCGAGCTCCACCAGTCCCGGGCCAGTCCACACTGAGCCCGGCCAGGCCCGCA                        | 8 |
| wt-73530-73650 | 4892 | TGAGTCCGTATCGGGGTCGGGTCACAGTGTATGGGGCCGGGGCTCCATGCGGATTTTTCAGTGTGGACACGCACATGCTCAGCCAGGTAAGTCTCCGGGTGAAGTAGGTGCGCA                     | 4 |
| wt-73650-73770 | 4893 | TGTGCTCCGCAAAAGCCCTGTCCAGGAGCGAGGGGAGCAGCAGCCGCCCAAGGACAGACCCAAATTTCTCCATGCTGTTAACTGAGAGTATCGCTTAAAGGTTCCCTCGTTGAAGC                   | 4 |
| wt-73770-73890 | 4894 | ACTGTGCGTGGGCCAAATAGACGTAGCCAGCAGATCGGCCAGGGCCAGGGGAAGGCGCCCTGTAGGCGTCTATGCTTCTGCCACAGCGGGATCTCTCGGAGTCCCGCCGAGTT                      | 8 |
| wt-73890-74010 | 4895 | TCTGTTGTCAAAGTGGGCAAAAGCTGGCTGCTCCGCCATGCGGAGGACCAAAGACTCCCCAGCTCGGCCAGGGACGTGACGGCGGCGAGCTGACAGACACTGGAAGTAA                          | 4 |
| wt-74010-74130 | 4896 | ATAGCTCCGTGAGGTGCGCCAGGGTCTCAATCGTACAAGGAATGCCCAAAAATAGTAAGCAGCCGTACTAGCACGAAGTGGGCTCGTGGAGCCAAAGGTTGCTAATGAACCACTGG                   | 4 |
| wt-74130-74250 | 4897 | CCGAGATGTTAACGCGGTAGATGCGGCGCAGACAGCCAGATCTTGGACGCAGCCAGCCAGCGGCCCTTGGCATCCCTGTGGCTGTTTCTTAGCGCTCAGTGTGAGCAGTTCCA                      | 4 |
| wt-74250-74370 | 4898 | CGAGGGGCGTGAGCGAGCGCAGGGCCCGCCGCGCATAGGTAGGTGGATAGACGCTCCGCGTGTAGCGCGGTGAGCGCGGTGAGCGCCGCGAGGAAAGGGGAAGGCTCCCTCCGCCGCGAGGTGCAGCG       | 8 |
| wt-74370-74490 | 4899 | TCAGAACCAGGCCGCGGCTCTGTGAGTGCAGCCGCTTGTGGCAGGTGAAGCTGCAGTTCACGAGAGAACCCGCCAGTGGTGGAGGGGGAGGGCGTTGTTGGCAAAAACAAAACA                     | 4 |
| wt-74490-74610 | 4900 | GCGGAAAGCCCTGTCAGGCGCGGAGAGATGTCATCGAGTGGCTCCGCAATGTACAGTGTGTTAGGCCACAAGGCGCTTGTAGCAGCGGGGGAGCATTATTAAGACCCGGGAGG                      | 4 |
| wt-74610-74730 | 4901 | CCCCAACGGCGGCTAAACAGAACAGTGGCTTCTATCTCCAGACTGGTGTGTGCGCGGCTTGGCTCTTTGGCCGGCCAGGAATAGATACAGCCAGCTCCCTGAGGACCCGAGAC                      | 4 |
| wt-74730-74850 | 4902 | CTTTGAGTGCCCGGACCGCTGGCGAGCCGAGATAGATCTGGCCCTGCCCTGGTGTGCAGGTGGGAGATTGCTAAGAAATGAGCAGACAGTGGGCTCACTGAGCAGGTTATTTGCT                    | 4 |
| wt-74850-74970 | 4903 | CGCTGTTCAAGCCAAATAGCATCACGGATCACCTGAAGCGCTTTCAGCGCTCCGCTGAGAGCTGCTGTGGGGTGGTGGAGGCCAGGTGGCAAGCTTGGGCGGTGCGCTCAGT                       | 4 |

|                |      |                                                                                                                             |   |
|----------------|------|-----------------------------------------------------------------------------------------------------------------------------|---|
| wt-74970-75090 | 4904 | CATCTGGAATACCATGATCTCTCTGGCTGTAAAGCGGCATCGAGATGGACGAGAATGGCTCAAGGCCCTGCTGGACAAAACAGGCTGGCGACAGCCTGGCCTGATGGAGATGGAGAAGGT    | 4 |
| wt-75090-75210 | 4905 | GGCCACGGCGCTCAAGATGGACGAGACCGGTGCCTGGGCGCAAGAGATCTCGGCCGTTGCTCATCGGTGACCGCCCTCAGCCTCGGCCCTTTTCATCAACTCCGCCCTTGAGCCCGA       | 8 |
| wt-75210-75330 | 4906 | GGTGCCACCCCGCTCCTTGCACCGCCTCCCGTGGTGGCGAGCCGGGAGCACTCTGGGCCACGGAGCTCGCGTTAACGTAGCAACCAGACTCCACACCAATAACATTTTATTGGTAA        | 4 |
| wt-75330-75450 | 4907 | AACAAGGGATATGAAGGTGTCATTGACCCGAGGATCCAAACCCCTCCCTGTCTCCCTCGAGCGCCTCGCTCAGCCCACTATCACCCATGGCCAGGCTCGGCACCTCTCGAAGGTGC        | 4 |
| wt-75450-75570 | 4908 | AGCTGGCCACCAATAAGAGAGATCTGGGGCCAAGGACCCCGCGTCACTGTGGGGGCTGTAGAAGGAGGTTGAGGTGGTGTCTTGTGAAGTAAACAAGCTGACAGAAGCGCCGGTACTTGT    | 4 |
| wt-75570-75690 | 4909 | TAAGGAACACGGTCTGGTCAAACTTGTTCAGGCTCAGCTCACCCACCCCGCCACTCGAGGCTCTACTAGAATACCTGCATGGCACGCCGACCTGCCAAAAGATTGTCG                | 4 |
| wt-75810-75930 | 4911 | GGTGGTTGATGGGACCCTTGCTCCTCCTCGCTTGTGGGGGTGGCATACTGAAGCGAGCAGGTGATTTTGAGCTCCGATGGACGAGCCAGGAGTTGTAGCCCGCTGATTCGGAGGA         | 4 |
| wt-75930-76050 | 4912 | TTAGCCGGAGTTCCCCCGTGTAGCCGGGATCGATGATGCCAACATGAGACGTGACCCGACGGGAGTGCTGCCCCACAGCATGAGCCATGACCCCTCGGGTGGCGGGCAGTAGAGCCTA      | 4 |
| wt-76050-76170 | 4913 | GGTCCACAGTTGTTGGTCTTCATCGGGCAGAGGATGGTGGTCTTGTGGACAAAGGTGAGCGCCCTACACTAGCCTGCTGGAGCAACAGCTGTGCTTCTGGAAGCGTAGCGTATGT         | 4 |
| wt-76170-76290 | 4914 | GTGGACAGGCCCTCATGGTGTATGATTAACAGACAGGGACGGCGGCTATATAAAGAGCCAAAGACCCGGCTCTTTACTGCCAAATGGGGAAGTCTCAAGAAAGCCGTTTGCAA           | 4 |
| wt-76290-76410 | 4915 | GGCTGTGCCACTGCTTCTCCTCGCCCGCCTTCTGACCCGGGCTGCCCAGCGGCTCCAGTCCCAAAACCGGGCGGGCTTCCCTGACTGAAGCCAGGACCATGCTA                    | 8 |
| wt-76410-76530 | 4916 | CTCCTACACATGTAATGCGGACATCTCGCCTTCTTACCAGTGGCTCCATCTGGCAGCTTGGCTCCACTCGGCACCTGACCCATGACCCATGATGACGTTG                        | 4 |
| wt-76530-76650 | 4917 | CTTTAAACAAGTTGTGAACACGCTGCTGACGGATAGATGGGGATATTAAAGGGGGCAGCAATCTCGGCTGTTGTACTTCTCTGCTCGTTAAACCAATAGCATGTCAGCTCCACG          | 4 |
| wt-76650-76770 | 4918 | CAAAGTCAGATTGCCCTTCTGTTAAGGCTGTTGACATGAGCATGGAAGACATGGCCGCCCGCTGGCTGCCTGGAGTCTGAGAATAAGGCTCTGAAGCAACAGGCTCTCAGAGGGGTGC      | 4 |
| wt-76770-76890 | 4919 | CTGTGCCTCGTCACTCTGTCTCTCTGCTCCAGTGCCTCCCGCTGAGCCGCTACAGCTCGACAGCGAGAGTTAATGATTACGCAGGCCACGGGCCGTTGGCGTCTCAGGCTATGAA         | 4 |
| wt-76890-77010 | 4920 | GAAGATTGAAGACAAGGTCGGAAATCTGTTGACGGTGAATACCAGCAATGAAATGAAAAATATTGCAAAATCTGACCCTCCGCATTCAAGTATCTATGTTGGGTGCAAAAGGCCA         | 4 |
| wt-77010-77130 | 4921 | ACCCAGCCTGTGGGAAACACGACCACGAGAATCAAACGACCCCAACGCCACCCGACGCTGCCCGCTCCCGCTCCCGGGACGTTGAAGCAAGAAAGTCAAAATTTCTGATTAAATAAT       | 4 |
| wt-77130-77250 | 4922 | TTTTATTGACTTTATACATAGGCTCTCGCGCTCATCATATGGTGGGGTGGTGTAGTATGGATGTAGACAAGTTACGCTAAAGGGCAGTCCGCCTGACCAAGCAGCAGAGAAGGGT         | 4 |
| wt-77250-77370 | 4923 | AGCACAGCCAGAGAGGCCACTGCAGTACTAGCATGGAGAGTTTGAAGAATCTGGGCTGGGACTTGGCGGGACTGGCACGGTGGCTGGGTGTGGTAAAGGGTGGGCTCGTAAAAAGTC       | 4 |
| wt-77370-77490 | 4924 | CAGCGGGGCGCAGTTTGTAGAAAGTGTGGGAGTAGATAGTGTGCGATTGTATCTCGGCTTTGGCGTAGTTGAATCACCGCCGTAATCTGTTGGTGGGCTGTACTTGTCCGGGT           | 4 |
| wt-77490-77610 | 4925 | CCATGCTGTGGTGTGCTTCCACCCGGTGTAGAAATGGCCCTTCCACCTGTTGAGGTGACCCTGAGCAACCGCCGCTTTTGGCCACTGGGGCCCTGGGGCAGCTTGCAATTTTGGGG        | 4 |
| wt-77610-77730 | 4926 | GGCGTGCCTTGGTGACATTAACCTCCCCCGTTTGTGGATTGGCAACTGTTCCAGGGCTGACGCTGGCTGTGGTGGTGGCTGGCGGGTGGTGGCAACATGATGT                     | 4 |
| wt-77730-77850 | 4927 | GTGCTGATAGAGGCTGGTGCACCTGTTTATATTCCACCCTGTTGGGTGAGCGGAGGTTAGTAAAGGCATATGTGACGTTGAAATGTACTGGTGGAGGGGCTGAGTGTCTTGGG           | 4 |
| wt-77850-77970 | 4928 | TTTGAAGTGGTCTCAGTGACATGGAAGAGTTGAACCTGAGTATTGTATTGTTGCTGTGGTAACAGCACTGGTGCATTTTTGGTGGCTGGTAACTACTGGGGTGGACTGT               | 4 |
| wt-77970-78090 | 4929 | CCTCCTAAGGTTGGTGGCATTTGCCTGTTGACTGTTCTCCTCCACAGTAGGGCCCGTGGCATTTGGGGTGGGGTAGTCACTGCTGAGGTGGCGCTGTTTTTCCCAAGGTGGGG           | 4 |
| wt-78090-78210 | 4930 | CTGGTGGCATTGGGGTGGGGTAGTCACTGTGAGGTGGGGCTGTTTTTCCCAGGTGGGGCTGGTGGCATTGGGGTGGGGTAGTCACTGCTGAGGTAGGACTGTTTTTCCCAAG            | 4 |
| wt-78210-78330 | 4931 | GTGGGGCTGGTGGCATTGGGGTGGGGTAGTCACTGTGGGTGGGGCTGGGCATTGGGGTGGGGTAGTCACTGCTGGGGTGGGGCTGGTGGCATTGGGGTGGGGTAGTCACT              | 4 |
| wt-78330-78450 | 4932 | GGTAGGTTGGAGCTGTGCATGTCGGGGCCCTTACTTCTGTGCCGTTGCCATGGAGATGGACTTGGTTGGTGCACCTGGTGCATCCAGAGTAAACACGATACAGTACTGTTTGGCAGAAATCGT | 4 |
| wt-78450-78570 | 4933 | TCCGGGTTGGATACAGTGGGGCTGTGCTTGCAAGTGGGTGAGGTTGGTAGGACGCTGAGTAGAGCTGGGTAGACCTGTCGTTGATTGGGATCAGCAAAATCCAGTTGTATTCAAGGTA      | 4 |
| wt-78570-78690 | 4934 | GGGAGGTTGGTGTGCTCTCGGGTGCCTGGGAAATATAACCTGTGGTGTGTGGTGGCATTGGTAGCCGTTCTGTGATAATGAGTGTCTTTGGGGGCGTCCAAAGACCCGAGACA           | 4 |
| wt-78690-78810 | 4935 | GTAATGTCAAAATGCCGATTGCTCGCAAAATGCACCAAAATTTTTCAACCCGAAGGTGCCCGAGGTGAGAGTCCATTTGCACCTAAAGTCAAGTTCAGTGTGTTGGCCAGGCC           | 4 |
| wt-78810-78930 | 4936 | CAAAAGGCAGTCACTGTAACATTTGGCGAGTTTGGCTCCTCAGAAGTGACCATGGCACTGAAATAGTAGCATTGTCCACCACATATGTATGCTGTGGTGGTGGTGGCAGTCCCTGT        | 4 |
| wt-78930-79050 | 4937 | GAAAGCTGGAATCTCATCAGAGAAACAAATGTTGGACTGAATGCAGTAATCTCCTCCCGCTCGCTTGGTGCATTCCAGAGTAAACACGATACAGTACTGTTATGCAAAGAAATCGT        | 4 |
| wt-79050-79170 | 4938 | GACACTGGACGTGGTGTGACAGCGAGGCTGATGCATACCCTGTACCAGTATTTGGGGTGGCCACGGGACTCGTTGATGTGAGAATTCCGCCGCTGGGAAACATGGCTCTCGTATCCACTG    | 4 |
| wt-79170-79290 | 4939 | CAGGTGATGTTAAATTTGTTGCTCGGGGAGAAGTGTGAAATTTCCGCATCCTCCATAATCACTCAATATCTATCTCATACCGAGCATTTCTGTTTTACGGTGAATTCGAGTCT           | 4 |
| wt-79290-79410 | 4940 | TGAGCTGACGTTGGCAAATTAAGGGTAGCGTGACATCCAGCCCTGTGCCCTCACTACTGCCGTTAATTGGTAGAATTAACAGTTATCCCACTTTATGATGGCAGCTGTTCTGGTATC       | 4 |
| wt-79410-79530 | 4941 | AGGTACACGGGGTTTGCATTTCTGCATGGTGGCACCACATGGTCCAAAACACATCTTGAAGTAGACATCTACAGATCCAGGCTTACTTGTGCTCTCCTCGGGTGGTGGGTAAT           | 4 |
| wt-79530-79650 | 4942 | GGAAAGCTTCTAGACCCGATAGTTGAGCCAAATTTCTCTGCACCAAAGGAGCTCCAGTAGAAAGAGATTGGTGGCATTTCTGAGCCCAAAATGCACCTCGAGGTTGGTAGACAGCCTC      | 4 |
| wt-79650-79770 | 4943 | GTATGGGGTGTGACGTTGGCCAAAGTCAAGATCAAGTTGATGCTTTTGCCTCCAGCATCGAAATGATAGTTACATTCACCTGTTCCGTTGCAAAATGATGATGGGGTAAATGGGAA        | 4 |
| wt-79770-79890 | 4944 | TCCGGAATCTCAACATGAAAAACAGGATCTTACCCGTGAGATGGATCAGGCTCTGGATGGTGTACTGACACACAAGCAAGGCTGCCTCCATTGCTCGGCACCGATTCTTAGGCGAG        | 4 |
| wt-79890-80010 | 4945 | CATCCTCTTAATAGGTACAAGGGGGTGGCGGTTTGGTGTGTGATCAGCTTTTGTGACAGACAAAATGGACAAGGACAGGCCGGTCCCGCCCGCCTGGATGACAACATGGAAGAAGAAT      | 4 |
| wt-80010-80130 | 4946 | CCCATCTACTCGTGTGTCAGGAACAGGATCGCGCGGAGATTGGGAAATGTCTCATAGAGTTATCAGATAGCAGCTCAGAAAAGGAAGCAGAAGATGCCACCCTGGAGCCGGCCCA         | 4 |
| wt-80130-80250 | 4947 | GAAAGGTACGAAAGAAAGCGGGTGCATCATGATGCCGGTGGGTCAGCTCCAGCAGACCCCATGCTCCACCCAGCCGGATCTCCTGGCGAGAAGGCCATTCTCCGAGGTTCCACT          | 4 |
| wt-80250-80370 | 4948 | AGATCTAAGAACAATCTTCAAGCGATTGGAGCCCGGCTACGGTGTGATGATGATGTTTTACCCTACACACAACAAGGTAAAGTAAATTTGTGGC                              | 4 |
| wt-80370-80490 | 4949 | GTTGGTTTTCAGGCATCGACACAGGATAGACCAGTTTTCGGATCCCAGATTTCAAAATACCAGATGTACATAATGTATGCCATTGGCCATTTCAGAGCCATTAGAGATCGTCGGA         | 4 |
| wt-80490-80610 | 4950 | GAAATCCAGCTTCTCGTAGAGATCAGGCCAAATGGAGACTGCAAAACCTGGCCCGCGGATGGCCATGGGTTACCAGGCATACAGCAGCTGGATGTACAGCTACACCGATCACCGACGA      | 4 |
| wt-80610-80730 | 4951 | CTCCCACATTCGTACATCTCCAGCGCACACTGGGTGCACAGGTTGGCCGTAGTGTCACTGTTCCGCGGACCTTTTAAAGCTGCCCGCATACCCCGGGGAGTCCCGCAGTGGT            | 4 |
| wt-80730-80850 | 4952 | TGTATGTTACAGACTCCGTGGTAACTGTTACAGAGCTGAATCCCGCTACAGTATTTCTTTGACTATTTGGCTATACACAGGAGCTACGAAATCTGGGAGGAAAGTTTAAAC             | 4 |
| wt-80850-80970 | 4953 | CTGACACCGGTTTCAATTTGAATTCTAGGATTTTTCAGAGAGAGGATTTGTCCATATCAAGAGTTTGTACAGCATTGGCTGGCAGCAGCTCCTGGGACCACTAGTATCCAAACCCGTGGATCG | 4 |
| wt-80970-81090 | 4954 | ATGACAATCTAGCACGGACGGACAGGCTTGAATGCCGGCTTCTCCGGGTGCTGCGTATGGGATAGACTTCTTGAAGTGAAGGGGAAATGTGGAAGGTGCTACCGGTGAAA              | 4 |
| wt-81090-81210 | 4955 | CGCGAAGAAAGTGAGGACACGGAGAGCGATGGAGATGATGAAGATCTTCTTGTATAGTGTCCAGAGGTGGACCTAAGGTTCAACGACCCCTATATTATAAGACGTTGACACAGGT         | 4 |

|                |      |                                                                                                                                     |    |
|----------------|------|-------------------------------------------------------------------------------------------------------------------------------------|----|
| wt-81210-81330 | 4956 | TGCTGCTGATGAGACGGGCAACAGCAACAGGCAAGGAGGTACTGAAAAGGCCCGTGGGAGCACTTATGGCACCTAGGCCCGCTGTTCGAAACCAAGACCAGAGTCCCAC                       | 4  |
| wt-81330-81450 | 4957 | AAAGCGACGAGACAGCTACCACTCACGGGTCGGCGCAAGTCCAGAAACCCCAACCATTCACCTAGCAGCTCAGGGAATGGCATACCCATTACATGAACAACACGGCATGGCCCCGTGTC             | 4  |
| wt-81570-81690 | 4959 | TCCGGCCCTGGGAGCCATCCCTGACACAGGCTCGGGGCGAGCCCTTTGCACCCGTTAGACCACAACACATGCCAGTAGAACCCGTCCCTGTCCCGACAGTGGCACTTGAGCGACCAGTTT            | 4  |
| wt-81690-81810 | 4960 | ACCCCAAGCCAGTTCGTCGGGCACTCTCAAGATTGCTATGCAGGGCCCCGGGAAACTTCTGGCATTAGACGCGCGGGGAGCGTTGGAGGCCCGCACCTTGGACGCCAAATCCACCCC               | 4  |
| wt-81810-81930 | 4961 | GTTCTCCAGTCAGATGTCCTGCGTGACCGTCTGGCTCGTTTGGCTGCTGAGGCACAGGTCAAACAGGTAGTGTGAGGTGCAGCCCCCAGTTGACCCAAGTATCCCTCAGCAAC                   | 4  |
| wt-81930-82050 | 4962 | CAATGGAGGGCCGTTGGTACCAGAGCAGCAGATGTTCCTCGTGCCCTTTAGCCAGTGTCTGATGTGTCGGGACCTGGGGCACCTGGGCACAGTGCAGCCACAGTACTTTGACCTCC                | 4  |
| wt-82050-82170 | 4963 | CCTTAATTCACCCATTAGCCAGGGGGCACCCGTTGGCCCGTTGAGGGCTAGTATGGGCCGCTAGTCCCGGTACCGGCAACACAGCCACAGTATTTTGACATCCCTTAAGCAACCCA                | 4  |
| wt-82170-82290 | 4964 | TTAACCCAGGGGCATCCGCGGCCCATTTTCTCCCTCAGCAACCCGATGGAGGGGCCGTTGGTACTGAGCAGTGGATGTTCCAGGTGCCGCCCTGAGCCAGAGTGTAGGCCAGGGGTAG              | 4  |
| wt-82290-82410 | 4965 | CGCAGTCACAATATTTGACCTCCCTTAACTCAACCCATTAAACCATGGGGACCCGACGCCATTTCCTCCATCAGCCCAATGGAGGGGGCGTGGTACCCGAGCAGTGGATGTTCC                  | 4  |
| wt-82410-82530 | 4966 | AAGGTGCCCCCTAGCCAAGGCATGACGTGGTCCAACATCAGCTGGATGCTTTGGGTATACACTCCATGGTCTTAACCATCCCGGGTTCCTGTCTCCTGCCGTTAAACCAATATC                  | 4  |
| wt-82530-82650 | 4967 | ATCTCAGCCAGGCTGCTTTGGTTACTATTGATGAGGATGAGATGGCCAGGGGTCGATACCTCCGAGCCGTGTAAGCTCTTGATTGTCAATCCATGGCAGGCCCTGCCCTCAGG                   | 4  |
| wt-82650-82890 | 4969 | AAAATGTCACAGGCCCTGAAACTAGAAAGGGTGGTGTGCAGCTGTTGTTCCATGTGTGACAGGATGACGAGTTCCGGATTCAGAGTTCGGGATCTACAAGATCCCTCAGATGAGCCTAAGCAAAGGTGAGA | 4  |
| wt-82890-83010 | 4970 | AGTGTGTCCCTCCATCCACCCACTGATAATACGCCGACAATAAAGTTGATGATATTGAATCCACACTGCTTGTGTTGTGATTATTTTCATATCCATGAGAGAGACCTCGCA                     | 4  |
| wt-83010-83130 | 4971 | TATTTGAGAAGGGTCACTGAAACATCTTATCTTAAAACAGTTACACTGAATATGAAGAAAGCGTGGCTCAGCAGAGCAGCAAGCCGATGCCGGGGGGCATCTGGCTCCGAGGAC                  | 4  |
| wt-83130-83250 | 4972 | CCACCAGATTATGGAGATCAAGGTAATGTGACACAGGTGGATCTGAGCCTATTTCACTGAGATTGGCCCCCTTGAACCTCTCGCGCCAGTGAAGATGATCCTCAATCTGGGCCAGTG               | 4  |
| wt-83250-83370 | 4973 | GAAGAGAATTTAGATGCCGTGCAAGAGAGGAAGAGAACCTCATGAGCAGGAGCAATGTTGGTGCAGATCCCTGGATGCCATACTGCCAGCCTAGATTTGTGGATGTGAACCCA                   | 4  |
| wt-83370-83490 | 4974 | ACGCAGGCTCCAGTGATCCCACTAGTCCACGCTGTCTATGATCCATGTTGGTAAAGAGCCACTAGAACAATTTCCAGATGTTTCGCTTGGATTGTTGGCCAGCTTAATTGATTGTCAT              | 4  |
| wt-83490-83610 | 4975 | TGGTTTACGAATCGACCTCCGGCCCTAGGCAGTTTATTCCTTGAGCAAACTGAACATCGAAGAATTTATATGGATGTGCATGACCGTGCATCAGATGTCAGGCCATCAGAAAA                   | 4  |
| wt-83610-83730 | 4976 | AAACCATTACCAATGTTAAGCAGAGGCGTTGGAAGTCTCTGTCATCTTGCAGATCTGGCGTATGGGTTACCCGACGCATAACCTCAAAGTAAACAGTTTGTAGTCAGGGGGGACAAT               | 4  |
| wt-83730-83850 | 4977 | GTCCACCCGGTCTTGTGACTGCTACGCTAGGATGTGATGAGGGACCGGCCATGCAACAACGTACAGTGTGGCATTGTACAGATACCACGAATATCAGACCAAAACCAAAGATCGAA                | 4  |
| wt-83850-83970 | 4978 | ACAGCCTTCTGATGGCAGCTGCTGAGTCACTTTCCGCGAAGAATATACTTTGTTCTTGTATTAGTATCCTCCGAAACACCCCTGTATGCTATATGGATTGGGCTGGGCACGAAA                  | 4  |
| wt-83970-84090 | 4979 | AACCGAGTTTCATTTAGTATTGAGTGTAGATGTTATGCAAGAAGCCACACTCATATCGCGAATGGTTCGGCCAGTGCACCGGAGCCCAAGCAGCCAAAGCCATGGTTAAGAGCG                  | 4  |
| wt-84090-84210 | 4980 | CATCTGTGCGCATTTCTTATGATGATCCGTTAACAAACAGGAGATTGATCTGGCTATGCCCGGGCAGGCCATGAATATTGAGGCTCCTAGACTGCCAGATGATCCTATAATTGT                  | 4  |
| wt-84210-84330 | 4981 | GAGGATGACGACGAAAGTGAAGAAATTAAGCTGAAAGCGACGAGGAGGAAGACAAGAGTGAATGGAATCTTAAAAATATACCGCAACACTGCCGTACAATCCACAGTATACGGC                  | 4  |
| wt-84330-84450 | 4982 | AGGCCCGCGGTGTTGACCGAAAGTCAAGTGCAAAATCAACCAAAAAATGCAGGGCCATAGTAACTGACTTTAGTGTAAATCAAGGCCATTGAAGAGGAACACAGAAAGAAAGAGGCC               | 4  |
| wt-84450-84570 | 4983 | AGAACAGAGCAGCCAAAGAGCCACGCTGAATCCCAGGCCCCACAGTGGTCTCCAGCAGCCACCCACGCAGCAAGAGCCTGGCCCCGTCCGGCCACTGAGTGTCCAGGCTCCGGTGGAG              | 8  |
| wt-84570-84690 | 4984 | CCATGGCAACCTTTGCCCTGGGCCAAAGTGACAGCAGTCTACTTACGAAAGATCCATGCAGGGTGTCCAAGTACATGTTGATGCTAGACCTTCTGAAAAAGACGATGAAGTCATG                 | 4  |
| wt-84690-84810 | 4985 | GAGCAGAGGGTTATGGCAACCTACTGCCACCAAGTACCACAACAGCCCGGGCTGGCAGAAAGAGGCCCTTGTGTCTTACCCGGTACCTAGCCATAGAGAGTATGAGCCGCTTCGACA               | 4  |
| wt-84810-84930 | 4986 | GAGCCGGTTCATGATCAGTACTGCCTGCCAGGACCTGACCCCTTGAATCCAACCACTAACGTCACCCACCCAGTCTCAACTAGCAGTTCGGCACCAAGTGCAGCAAACTCCA                    | 4  |
| wt-84930-85050 | 4987 | TGGCCGGTGGTTCAGCCAAAGTCAAGTCCAGATGACCCAAACGAAACAGTCCCGGCCACCGGAAACAGCTGCCCCACGCCAGTGGCCAAATGCCCTGCCAGCTATCCCTATGCGCCCTTG            | 4  |
| wt-85050-85170 | 4988 | CGGATGCAGCCAAATCCATTTAATCATCCAGTGGGACCCACTCCCATCAGACACCTCAAGTGGAAATAACACCATATAAGCCCACTTGGGCTCAGATAGGGCACATTCATATCAGCCT              | 4  |
| wt-85170-85290 | 4989 | ACACCAACGGGTCTGCTACCATGCTGTTGCGCCAGTGGGCACCCGCCACTGACAGACACCAGAGCGCCACTCCATGTACCACCTGAGGTGCCACCCGTTCCCGGCCAGAGG                     | 8  |
| wt-85290-85410 | 4990 | CCTCGGGGGGCGCCACTCCCACGCCACTCCTCAGGTGCCGCCCTTCCCGGGCAGAGGCCCTCGGGGGCGCCACTCCCAGCCACTCCTCAGTGTCTGCCACTCCCATGCAGCTG                   | 12 |
| wt-85410-85530 | 4991 | GCACTAAGGGCTCCTGCTGGTCAGCAGGGGCCGACAAGCAAAATTTGCGCCAATTGTTAAAGGGGGCGTCAAGAAAGGGAGACCATCACTTAAGTTACAGGCCGCCCTTGGCGTCAA               | 4  |
| wt-85530-85650 | 4992 | GCCGCTGCGGGCTGGCAGCCTTACCAGGGTCCGGCACCAGTGACAAGATTGTGACAGCGCCTATTTCTACCACCCGTTTTCAGCCCATACAGGTTATGGGGCAAGGGGGTTCGCCA                | 4  |
| wt-85650-85770 | 4993 | ACGGCCATGGCCGCTCAGCGGTGACACAGGCACCCACGGAATATACCAGGAAAGAGGGGAGTGGGGCCTATGCCCTCCACCGATATCCGCGCTTAAACGAGCGAAGATCGAGGCC                 | 4  |
| wt-85770-85890 | 4994 | TATACAGAGCCGAGATGCCGACGGGGGGGCTCGCACTCCTCCGCTGTTATCTTGGAGAATGTGCGCCAGGGGCAACAGCAGACTCTGGAGTGGGAGGAAGTGTAAACAGGAAAGG                 | 4  |
| wt-85890-86010 | 4995 | GACATGTTGGGGTGGGGGACATTGCAGTTCCTCCCTTCTCTGAAACATCGAACGATGAGTGATTTCCGCCATGTAACAAGAACTGGGATGAACCCCTGGGGCAACAGACTGCGG                  | 4  |
| wt-86010-86130 | 4996 | GGAGGAGGGGGCAGTGATAAGTCATGACAATTTAGATGAGGTAGAATTTGCATATTTTCAGACCCACCATGGAATCATTGAAGGACAGGGGGACTCTAGACAGTACCAGGACAAAT                | 4  |
| wt-86130-86250 | 4997 | GAGCGGGGAGATAATGTACAGACTACCGGCAGCATGATCAGGACCTGGGCCGGGGCTCCATCCAGTGGGGCTTCTGAGAGATTGGTACCAGAAGAGTCACTCAAGAGATCAGCAA                 | 4  |
| wt-86250-86370 | 4998 | CCTTGGGGCAAAGCAGGGGTGATGAAAACAGAGGCTGGATGCAGGCCATCAGGCCAAGGGCAGAAAGAGCGGCTGCCTTGTCCGGCCATCTTTAGACACGGAAGACAAATGCGCCCA               | 4  |
| wt-86370-86490 | 4999 | TGGTTGCCTCCACAGCATCACACATATACCGCAAGGAATATCAGGGATGCTGCCTGCCGGGCTGCAAGGTGAGTATGCCTTAACTGGGTTATGGGGCCATCTAAGGCCACGTT                   | 4  |
| wt-86490-86610 | 5000 | GTGACCCATGTTCCATAATTTAGCAATCGCACTGCAAGCGCTATCAAACCTGACTCGATAGTGGTTAGACACACAACACATCTGTCTTCGTTGATGGCAGCCAGGAGCGCT                     | 4  |
| wt-86610-86730 | 5001 | TTCAGGACATTCAGCTGGACCTTGGTTCGGAGGGCGGTGGTGGCGACATTGGCTTCAACTCTCCAGCCAATCCTGGCCATGGGATATCGTACAGCAACACTACGCACAT                       | 4  |
| wt-86730-86850 | 5002 | TAACTCCCGTCCCTAACAGGGTTGGGGCTGACAGCATCATGTTAACTGCCACATTTGGATGCCAAAATGCGGCACGAACTTAAACACCTTCTGCCACCGTGTGGACACCACCCATG                | 4  |
| wt-86850-86970 | 5003 | CTGGACCAAGAGAGCAAGAAAGATACGCTCGGGAAAGCCAGGTACGCTTCTTCGTTGTAATGGCAGAGGGCGTACCAGAAATCTATGATTTGATAGAACTGTGTGGCTCTCTGCACC               | 4  |
| wt-86970-87090 | 5004 | ACATTTAGCCAAAATTTGCTCCAGACCAGGAGAACTTTTATGATTTGCTGCGTTTCACTGGGTGTCATGCCAGTGCATAATCCAGCTGTGAATTTAGGTTTCAAGACAATCGGAA                 | 4  |
| wt-87090-87210 | 5005 | ACTTTAAGCCATATTACCCGTGGAATGCACCACTAATGAAAATCCATACACGCGGAGAGGCATAAAAAGAACACGTAATCCAGAACGCATTTGAAAGGCACAAAACAGGGTTTAT                 | 4  |
| wt-87210-87330 | 5006 | CAATGTTAGCAACGGGAGTGAACCCAGAGGTGATGCTACTAGTAAACGAGCAGTGTGATGAGACACCCGTAGACAGGGTTCGACCTGAGCTAGAGTCTCGGACGATGAGCTGCCAT                | 4  |
| wt-87330-87450 | 5007 | ATATCGATCCCAATATGGAGCCGGTTCAGCAGAGGCCGCTCATGTTTGTGAGCCGTGTGCTGCAAAAGAAACCGAGGAAACTGCCTTGGCCACGCCCAAGACGCACCCAGTGAAGCGCA             | 4  |
| wt-87450-87570 | 5008 | CAAAATGTTAAGACCTCTGATAGATCTGATAAGGCAGAAGCACAACACCCCTGAAAGGCCGGGGCCCTTCGAACAATCATCAGTGACCGTGGAGCCCGCCACCCGACCCGGTGGAGA               | 4  |

|                |      |                                                                                                                           |    |
|----------------|------|---------------------------------------------------------------------------------------------------------------------------|----|
| wt-87570-87690 | 5009 | TGCCAATGGTGATTCTCCATCAACCACCTCCAGTGCCCAAACCGGTTCCAGTCAAGCCTACGCCACCGCCTCCCGTAGGAGAAGGGGAGCGTGTGTGTGACGACGATGATGTCATAG     | 4  |
| wt-87690-87810 | 5010 | AGGTGATTGATGTTGAAACCACCGAAGATTTCATCGTCAGTGTACAGCCAAATAAGCCACATCGGAAACATCAAGACGGCTTTCAACGTTACGGCCGACGTCAA AACACGAGCCGCGCTC | 4  |
| wt-87810-87930 | 5011 | CCACCGTGAGTCTTCGGATACTGGGCCTCTGCGGTGGGGCCTCTGCCGCGGGGCCTCTGCCGCGGGCCTCTGCCGCGGGGCTCTGCCGCGGGGCTCTGCCGCGGGGCTC             | 12 |
| wt-87930-88050 | 5012 | CTGCCGCGGGGCTCGCATACTGGCGCTCTTCCGCTGGGCCTCTGCCGCGGGGCTCACATAGTGACGCCCTCTCCGCCCGGCTCGTATAATGGCGCTCCCGTCGTACGTATGT          | 8  |
| wt-88050-88170 | 5013 | TTATGAGGGAGCGACAGCTCCCCAGTCCACCGGCCGTA AACCTCAGTGCTTCTGGGAAATCGGGCTGGTGTGAAATACACAATGCAACAAGAACCAAGTTCACACCTGCAGTCCG      | 4  |
| wt-88170-88290 | 5014 | CCACTCAGCTACAAGCCTCGCCCATGATGGCCCCATCAGTCTGCCCTCTCGGTGATGTGCTGGTAAGGCCAGCCATAGAAAGTTCACACTTCAGTTCCATGTCGCCACAC            | 4  |
| wt-88290-88410 | 5015 | AGCCGATATCGCACGAAGAAACACCCGGTATGAGGATATGAGATATACTGACTCTCTGTTAAAGTTTACATTCAGACGTTGCTGCTCAACCACTCCCGAGGCTCCATCCAGGGATACCAG  | 4  |
| wt-88410-88530 | 5016 | AGCCGCGGGCCCCAGGCTCCATACCAGGGATACCAGGAGCCGCCGCCCGCCAGGCTCCATACCAGGGATACCAGGAGCCGCCGCCCGCCAGGCTCCAATCATCTTCATATCCAGGAT     | 8  |
| wt-88530-88650 | 5017 | ATGCCGGTCCCTGGACCCCAAGGTCTCAACATCCATGTTATAGGACCCCTGGGCACCATGGTCTCAAGATCCTGTGCATGGGCACACCCAGGGTCCATGGGATCCAGGGCACCACATC    | 4  |
| wt-88650-88770 | 5018 | TCCCACCTCAGTGGATGGATCTGCAGGACATGGCCAGGATCAGGTCTCCAGTCCACATCTGCAATCGGAGACAGGCCACACGCTTCAACTTTCATTGGTGCCACTGGTCTCAT         | 4  |
| wt-88770-88890 | 5019 | CCTCTGCACCATCATGTCATCTCCACGCCCGGAGCCCCATCAGCCCCATTCCAACAAGTCCCCCTCCCTATGCCGTTACAAGATAGCATGGCCGTGGGTGTGACTCATCAG           | 4  |
| wt-88890-89010 | 5020 | GTACAGCATGCCCAAGCATGCCCTTTGCCAGTGATTACAGTCAAGGTGCATTTACCCACTGGACATTAATGACCCACGCAAAAAGGGCTCGAGTAGAAGAAAGTTCTCACGGACTG      | 4  |
| wt-89010-89130 | 5021 | CCCCGTGTCCCAAGCTACTGCTGAAGCACAGGAGATTTCTCAGTGACAATTTCTGAGATCTCCGTGTCCCAAAGGACGCGAAGCAGACTGACTACGATGCATCCACTGAAAGTGAGCTAG  | 4  |
| wt-89130-89250 | 5022 | ATTAAGGGGATCCAAGGTGACCCCTGTAGCTATTTGATCTTTGACTGACACATAAACATGGTTAAGGAATGAACACTCATGGTGTGAGACTGGAAGTACTAAATTTGCTGACATAT      | 4  |
| wt-89250-89370 | 5023 | GTACAATGAGAGCCAAAATTTGATAAACCTTAAAGTCCCCCATCTAATGATGTCCAGTCCCTTCTCCACCTGTACACCCCGACCCAAAGGACTCAATGGCATTAGATTTCTA          | 4  |
| wt-89370-89490 | 5024 | GTTACCACAGTAGAATATCGGGCTGGCCATAAAAAAAGTGCATGGATAGTCTGACAGGCTGGAAACCCCATCCAGGTGTGCTCTTTTTGGTGAATAAAAACAGCAT                | 4  |
| wt-89490-89610 | 5025 | CCTTTATAGAAAATGTATTTCTCTGGTGTGACAGTATGACAGTTAGCTTTGGTATAGTTTTGGGTAACCTGAAATGTGTCAGGGTGGGTGTCACATGGCCAGTTTTACCTTTTG        | 4  |
| wt-89610-89730 | 5026 | TCCCATACTCTGCTCGGCCGTCTGTTAAAGTAAACCGCGGTGGAGATCCACCGCCAGACCTTACATTTGTTGGTACCAGGTGATGGCCGCGGTGCCACCCGCTCTCT               | 4  |
| wt-89730-89850 | 5027 | CCTTTACCTGGGTGGCAAAAAGTATGCCAGGAGTAGAACAATAACAAGTGCATGGATGGCGTAAACAATGCCACCTCACCTGCTTAAATGAAACCATGGCAACCACTTCAAAGAGAGCC   | 4  |
| wt-89850-89970 | 5028 | GACAGGAAGATATTTAATAATCCATTAGTAAACGAGGCGTGAAGACAGCGGTGTTTCAATAACGGGAGTTAGAAATTTAAGAGATCCTCGTGTAAACATCTGGTGTCCGGGGGATA      | 4  |
| wt-89970-90090 | 5029 | ATGGAGTCAACATCCAGGCTTGGGCACATGCTTCAACAGGAGCGCAGCCTGTCTTTTTCAGATGATTGGCAGCAGCCACCTCGCGCAAAAATCAGGCGTTTAGATGGGGCATTTA       | 4  |
| wt-90090-90210 | 5030 | TGTTGGGACGCTAGCCGCTGGGCACTCGTGTGATATACTGACCTACGGTGTGCTGACAGGTTGCTTAAACTTTGGCCGGCATTTCTGGAAGCCACCGGACTTTGATCGC             | 4  |
| wt-90210-90330 | 5031 | TTTTTTTAGTTCAGAATCGATTCTCCAGCTCGAGCAAGGGAATCGTTACTACAAGTGGTCCATAGTCAGTTGAAACAAGCCCAACATCCGCTGCCGCCCTCCATGAGCCCCA          | 4  |
| wt-90330-90450 | 5032 | CCGTCCGCTGCCGCCCTCTTGAGCCCTCTTACCGATTCTGGCTGTTGTGTTTCCGTGTGCTGTGCCGCGGACGCACTGGTGCAGGCTGTGGAACACCAATGTCTGCTAGCTG          | 4  |
| wt-90450-90570 | 5033 | TTGTCTTGGTATAGCCCGGGCAAGCAAAACCACTGCTCTGTGTTGAACAGTAGAATTGTCTCCAGTGTAGGGTCTCTCCCGGCTTGTTAGTCTGTTGATCTGGGTAT               | 4  |
| wt-90570-90690 | 5034 | GTCCGGAGCTGGGAACAGCTGAGGTGCTGCATAAGCTTATAAGCATTCTCAGGAGCAGGCTGAGGGGCGA AAAACCCAGCCAGTCCGAGCGGTTGAAACATGATAGGCAGTTAGCTG    | 4  |
| wt-90690-90810 | 5035 | GCCTTGTGGCAGGCTCTGGCAGCACCGGCCACAGCACACAAGGCAAGGAGCTTGCATGCCCTCCAGGTCTGATAGACTTGGTACTTGGTCAAAGCTTGTACAAAAGCTGCAC          | 4  |
| wt-90810-90930 | 5036 | CTGGTATGGGTCAGGTGTAATTTTACATCTTCAGAAAGTCGAGTTTGGGTCATCTTCAGCAAAATAGCAAAAGGTGGCCGGCAAGGTGCAATGTTTAGTGAGTTACCTTAACA         | 4  |
| wt-90930-91050 | 5037 | TCTCCCTTTAAAGCCAAAGCCACCGCTCTCTGTGATGTGCTGTTTGGGACGTGCTAAATTTAGGTGTGTCTATGAGGTACATTAGCAATGCCTGTGGCTCATGCATAGTTCTAAA       | 4  |
| wt-91050-91170 | 5038 | AGAGGAGGAGGCAAGTTTTCAGAAAGTGTCTAAAATAAGCTGGTGTCAAAAATAGACAGCCAGTTGAAATAGCATGGCATGCAGCAGACATTCAATTTAGAAATGTATCCAAGATTTC    | 4  |
| wt-91170-91290 | 5039 | ATTAAGTTCGGGGTTCAGGGGGGAGTCCAGATTCAAATCCTCTGTGATGGACTAGTGTGTTGGTGTGCTGTGTTGTTGGTGTGTTGTTGTTGGTGTGTTGTTGTTGTTGTTGTTGTT     | 4  |
| wt-91290-91410 | 5040 | TATGGCTCTCTCTCTCTGCGGGAATAACAGTGTGAGCCATCTCCCTTAGGGCTTACGGCCTGACTGTTTCTCATCAGGCTTCCAACAGATGACTTGCCTCGGGGTTACTGC           | 4  |
| wt-91410-91530 | 5041 | GGGGGCGGGTCAAGTGGCTGGGCAACCGGGCTGGCGTTAGGGATCCGACCGGTTATGGACAGGTCCTGTGGGGTGGGAGCCAAAGAGGCAAGGCAAGGCGGGTGGCCACGGGA         | 8  |
| wt-91530-91650 | 5042 | TCCGGGTGGATGGAAGGCCTGATCTCTTTGGCTGACACACCTCTCGCCCTCGAACACGTGAGATATGGCACTGCCGCTTCCGGCTTTGGCAGGAACATACCTTCCCGGCTATCCCT      | 4  |
| wt-91650-91770 | 5043 | GAGGCCCTTCTTCTTTAACGGGAGGAAGAAAGTGGGCTTTAGGGGTGGGGGAATATGGTCTCTCATCGCTCTTGGTGGACCCTGCTATCCAAGGCTGTTAGGTTCCGCCG            | 4  |
| wt-91770-91890 | 5044 | GTTGGAAGGACATGAGGTTTACCACGGTGGGCTGGATGTCGGCGCGACTTTGGGGCCCGAGGCGCGGGCCTCGGCCCTGGCTCTCCCGCTGCTCTGCTGGTGTCACTGTT            | 8  |
| wt-91890-92010 | 5045 | GCCCAGTCACTGCTGCTGAACTGCTGACCCGAGTGGCGCTTTGGGCACCGGCTTCCAGGGCATGGTCCGGCTCGGGAGACTTTCCAGTTCATCTGTAAAAGCATGAACTGTCC         | 4  |
| wt-92010-92130 | 5046 | GGACTCCGAGTAGCGGGCCTCGGTGTGAGAGGACCCCCATCAATCCCCATGAGCTCTCTGCTCCATCCTGTGCGGCTCCGGACACGAGGATAGGAGTTTCACTGCTTGGACTGGTTGA    | 4  |
| wt-92130-92250 | 5047 | CAGCAGGCACGGGAAGCAGCGGCTCACGTAGTCTCTGTCCGGCTGGCTGGAGTAGGAGCCCGGGGAGTGTCTTAATCAGAGCCCTGACATCTTAACATCGTCCGTCAGATG           | 4  |
| wt-92250-92370 | 5048 | GCCTGTCTGGACGAGACCATAGTCTGGAACATCTCTCGAGGACGGATAGGTGAACACCCTTCAAAAAGGCTTGAAGTGGAGCTTAGGAGCCCTCTCTCCATCTGTTTCAG            | 4  |
| wt-92370-92490 | 5049 | GTGTTCCACTACTGCTTGGCCGAGCCATGATGACCAGGCGGCTCCACGCCAGCACCCTGCTGATGAGTGTAGCCCGCACCCGACTGTGTTTAGGAGCTGTACATAGCGGTGCCAT       | 4  |
| wt-92490-92610 | 5050 | GGTGGCAGGAATCATACCCGGTGGCTGGGGCCTGGATGAAGAATCTGTAGTACCCTATCAGGTGGTCAACACGTAGCGCATCACTATAGGGCACCGGATGGAACATGCTGCTGTT       | 4  |
| wt-92610-92730 | 5051 | GCCGGCATCTCAGCCCGTCTTCTTACCCTGTGTTTCGGGAAGTGGCCAAAATGTCAGATGTTGAGCGTGGCCATTAGCCCGCCCATCTCGCCGTTGGCCCTGGCCATTAT            | 4  |
| wt-92730-92850 | 5052 | AAATGCCTTGACATATTTTAGGATCTCAGAGTAATCTCCACACTCCCGGCTGTAATTTCTTGTAGGACGTTGACAGTGTGACAGACAGAGAGCCAGCTGCTTTTTGATTTTCAGG       | 4  |
| wt-92850-92970 | 5053 | AGTTAGCCTCAGAAAGTCTTCCAAGCCATCTTTTAGGCCTCATGGCTAGTAGTAACAGAGGAAATGCCGACCATTAAAATCTTCTCCATGAGCTTACTGAAACACTATCCCGA         | 4  |
| wt-92970-93090 | 5054 | AGTGGGGGATGTTGCATCTACTGAACACCATCGGGTCTGACTGCGACTCCCACTAGCCACCCACTCTGACAGCCAGAGGGGCTGTTCTGGCAAGAGTCTTGAGGCTGTACA           | 4  |
| wt-93090-93210 | 5055 | GCAGCACAACTGCTGGAAGACACCATCGTCCCCAAGATCTTAAAGAGCTGGCTATTTCTTAGAGCTGCAAGTACTACTCCCCAAGGATGAAACAGCGTGACATCGCCGAGGTTCT       | 4  |
| wt-93210-93330 | 5056 | TGACCACCTCAAGACGAATCGGGACCTGGGCTGGACGACAGACTTGGCCCTGATTAGGAACTGCGCAAGCAGACACCATGCTGTAAAGTGTCTCATGCCAGGACGACTA             | 4  |
| wt-93330-93450 | 5057 | CACAGCCGTGCTGCTGACTACTAGCAGCCATCTCCATAGGTATGAGGAAGTAAATCGCGATGCTGCCAGTGGCTATGCCTCCATGCCTCCATGACGGCCACGACAACTCTC           | 4  |
| wt-93450-93570 | 5058 | CCACCAGCTTGTGTCGCTCGGGCCAGTGAAGAACCTGCGCTGGCGGGTCTTTAACAGGCTCCTCTGAGCTGTGGCCCTGCAAGTTTCGAGATGCATTTACTATAA                 | 4  |
| wt-93570-93690 | 5059 | CTACATTCAGGGATCTATAGCCACCATCTCCAGCTTCTGCACCTCGAGATCAAGGCCCTCTGCAGCTGGATAATACCAGGATGGCATGCGCCTCTTCAACACAGCAGGCTCTCT        | 4  |

|                |      |                                                                                                                          |   |
|----------------|------|--------------------------------------------------------------------------------------------------------------------------|---|
| wt-93690-93810 | 5060 | CACCCTCTGGGAGAGCGTGGCCGCAAAATCAGGAGGTCACGGATGCCATTACCTGCGCTGACTGCGCTGAATACATAGACCTACTAAAGCACACAAAACATGTCTAGAAAAGTGTCTGCG | 4 |
| wt-93810-93930 | 5061 | CATGCAATACAAAATAAATTTCTCTTACCTGCGTCTGTTTGTGTAGTGAAGTGTGTGTCTGTATGTGATTCTACTTTAAAAAGGCCGGCTGACATGGATTACTGGTCTTTATGAGCCA   | 4 |
| wt-93930-94050 | 5062 | TTGGCATGGCGGGACAATCGCAATATAAAACCTGACCATCACATGGGCAATTAGGCGACTCTGCATCAGCATCGCTTAAAGTATGAGTGGGACGAGAGAGGCTCGGTATTTGGTTTC    | 4 |
| wt-94050-94170 | 5063 | CTGAACATCTGGCTGGGGCATTAACTAAGCTTATGAGCGATTTTATCACAGGACAAGATGTCACCTTTCTGGAGAAATATTGCAGTCAAAATTGCGGATGCTATAAAACGACCCCCG    | 4 |
| wt-94170-94290 | 5064 | GGGGTGGTGATGACTACTTTCTCCCTGTTTGTCTTATGGAATGCCCTCCCAACATCTGGTAGACAATCTCCAGGGACGATTTAATCCAGCGCCCGTGCAGGCTGTAAACCCAGG       | 4 |
| wt-94290-94410 | 5065 | CCCACAATTATGTCTGGGTATTTCAGGTGAGACTCACACAGGACACCCAGCTGCTCCGGGCTATCGTACGGGCTCCAAAAATTGGGTGGATTCTGCGGGATGTC                 | 4 |
| wt-94410-94530 | 5066 | CAGAGTGCCACAATGTCTTAAAGGCTTAAAGGCAATTAAGCCGATTTATGAAATCCATTAGGAAATACACACACTAAGCAGTGTAGTCTGTCCCTGCTCAATCTCCTGAACTGTTGGTCC | 4 |
| wt-94530-94650 | 5067 | ACAAGCTTGTGGCTTACGTGGTCATGTGCAGCTTGCATACGACGCCGTGCTCAGCCTGACTTTCACGAAATCCCTGACCTCGATGACTCCGATGCTGTTTTCGCACGACCTTAT       | 4 |
| wt-94650-94770 | 5068 | TGGCAGCCTTATTTACCTCAATATGTTCTTTATCTCAAAGATTACATAACACAAGACTCCATGAGCTTGAAGCAGGCCCTCAGTGGTCATTGGATGCTGCCAGGGCAACCCCTGCG     | 4 |
| wt-94770-94890 | 5069 | CTGCAGCAGCGAAACCTGCGAGACTTGGAAAGCTTTCCGAAATTCGGATAATCACTTTTATCTCCCGACGACAGGGCCCTTAAACACCTTCCAATTTCCCGAAGAGCTTCTGGGGC     | 4 |
| wt-94890-95010 | 5070 | GCGTTGTTGTTATGTTCTCTTTGTGTGCCCGAGTCACTTTCAGGACGTTATCACCATTGGTGTGGGGCGGGTGTCTCTGCTCTCGTTTTCGGCCCTGCCCGGCCCATCTTC          | 4 |
| wt-95010-95130 | 5071 | GCGAGCCCGACGACATGCTCTCAGTTAACGAGCAGAGGGAATGAAGCTCAGGCGAACTTGGGCAACCCGCGGGGACCTCCCTGCTGTTCGCCAGTTTTGCCCATCGTTTCCC         | 4 |
| wt-95130-95250 | 5072 | TGACGGCTCAGGGCCAAAGCAAAACCGCGGGGGCATGGATCCTTGCACCTAGCCAAGCTGAGGAAACCTCCCGCGCTCTCCCGATGCCCCATCGTTCGCCAGCGGCTCCA           | 8 |
| wt-95250-95370 | 5073 | GGTCCAAGCAGCACTGCGGGGTCACTGGATCCTCACAGGCCGACCCAGCTTTCTCCGTTGCCCGAGTACATCTGTCTGGTGACCTTGAAGAGGAAGAGGAGGGTCCCGAGAAT        | 4 |
| wt-95370-95490 | 5074 | CCCATCCCTACCCTCCAGCAAAAAGGGGGACGAGGAATTTGAGGCTGGCTTGGGCTCAGGACGCAAACTTGAAGGATGTTACGCGGAGTTTTCCGGGCTGCGAGTAATTTGGTATG     | 4 |
| wt-95490-95610 | 5075 | AGGACGAGGATGGTTCGGAGGATGGGGAATTTTCAGACCTGGATCTGTCTGACAGCGACCATGAAGGGGATGAGGGTGGGGGGGCTGTTGGAGGGGGCAGGAGTCTGACTCCCTGTATT  | 4 |
| wt-95610-95730 | 5076 | CACTGAGCGTCTTAATAAAGATGCTCTATTGATCTCTTTAGTGTGAATCATGTCTGACGAGGGCCAGGTACAGGACCTGGAAATGGCCTAGGAGAGAAGGGAGACACATCTGGACCA    | 4 |
| wt-95730-95850 | 5077 | GAAGGCTCCGGCGGCAGTGGACCTCAAAGAAGAGGGGTGATAACATGGACGAGGACGGGGAAGAGGACGAGGACGAGGAGGGCAAGCAGGAGCCCGGGCGGCTCAGGATCAGGG       | 8 |
| wt-95850-95970 | 5078 | CCAAGACATAGAGATGGTGTCCGGAGACCCAAAACGTTCAAGTTGCATTGGCTGCAAAGGGACCCACGGTGAACAGGAGCAGGAGCAGGAGCGGGAGGGGAGGAGCAGGAGGGGCA     | 4 |
| wt-95970-96090 | 5079 | GGAGCAGGAGGAGGGGACGAGGAGCAGGAGGAGGGGACGAGGAGGGGACGAGGAGGGGACGAGGAGGGGACGAGGAGGGGACGAGGAGGGGACGAGGAGGGGACGAGGAGGGGCA      | 8 |
| wt-96090-96210 | 5080 | GCAGGAGGAGGGGACGAGGAGGAGGAGGGGACGAGGAGGGGACGAGGAGGGGACGAGGAGGGGACGAGGAGGGGACGAGGAGGGGACGAGGAGGGGACGAGGAGGGGACGAGGAGGGG   | 8 |
| wt-96210-96330 | 5081 | GCAGGAGCAGGAGGAGGGGACGAGGAGGGGACGAGGAGGGGACGAGGAGGGGACGAGGAGGGGACGAGGAGGGGACGAGGAGGGGACGAGGAGGGGACGAGGAGGGGACGAGGAGGGG   | 8 |
| wt-96450-96570 | 5082 | GGAGGGGACGAGGAGGGGACGAGGAGGGGACGAGGAGGGGACGAGGAGGGGACGAGGAGGGGACGAGGAGGGGACGAGGAGGGGACGAGGAGGGGACGAGGAGGGGACGAGGAGGGG    | 8 |
| wt-96570-96690 | 5083 | GGAGCAGGAGGGGACGAGGAGGGGACGAGGAGGGGACGAGGAGGGGACGAGGAGGGGACGAGGAGGGGACGAGGAGGGGACGAGGAGGGGACGAGGAGGGGACGAGGAGGGG         | 8 |
| wt-96690-96810 | 5084 | GGCCGGGCTGAGGAGGAGTGGAGGCCCGCGGGGTAGAGGACGTGAAAGAGCCAGGGGGGAAGTCTGAAAGAGCCAGGGGGAGAGGCTGTGGACGTGGAGAAAAGAGGCCAGGAGT      | 8 |
| wt-96810-96930 | 5085 | CCCAGTAGTCAGTCATCATCCGGGTCTCCACCGCGAGGCCCTCCAGGTAGAAGGCCATTTTCCACCCTGTAGGGGAAGCCGATTTTGAATACCACCAAGAAGGTGGCCCA           | 4 |
| wt-96930-97050 | 5086 | GATGGTGAGCTGACGTGCCCGGGAGCGATAGAGCAGGGCCCGCAGATGACCCAGGAGAAAGGCCCAAGCACTGGACCCCGGGGTGAGGTGATGGAGCAGGGCAGGAGGAGGGG        | 8 |
| wt-97050-97170 | 5087 | TGTTTTGAAAAGCATCGTGCTCAAGGAGGTTCCAAACCGAAATTTGAGAACATTCAGAGAGGTTTAAAGAGCTCTCCCTGGCTAGGAGTACAGTAAAGGACTACCCGACAGGAACTGG   | 4 |
| wt-97170-97290 | 5088 | GTCGCGGTGTGTTGATATAGGAGGTAGTAAGACCTCCCTTTACAACCTAAGGCGAGGAACTGCCCTTGTCTATTCCACAATGTCTGTACACCAATTGAGTCTCTCCCTTTGGAATG     | 4 |
| wt-97290-97410 | 5089 | GCCCTGGACCCGCCCACAACTGGCCCGCTAAGGGAGTCCATTGTCTGTATTTTCACTGCTTTTACAAAACATATATTGTCTGAGGTTTTGAAGGATGCGATTAAGGACTTGT         | 4 |
| wt-97410-97530 | 5090 | ATGACAAAGCCCGCTCCTACCTGCAATATCAGGGTACTGTGTGCAGCTTTGACGATGGAGTAGATTTGCTCCCTGGTTTTCCACCTATGGTGAAGGGGCTGCCCGGAGGGTATGAC     | 4 |
| wt-97530-97650 | 5091 | GGAGATGACGGAGATGAAGGAGGTGATGGAGTGGAGGTGAGGAAGGGCAGGAGTGTATTAATTTGTAGGAGACCCCTCAATCGTATTAAGCCGTGATTTCCCCGCACTAAAGAA       | 4 |
| wt-97650-97770 | 5092 | TAAATCCCAAGTAGACATCATGCGTGTGTTGGTATTTCTGGCCATCTGTCTTGACCAATTTCTGCTCCCAACATGAGGGCAATTTGGGCATACCCATGTTGTACGTCACCTAGCT      | 4 |
| wt-97770-97890 | 5093 | CCGCGCTCAACACCTTCTCGCTTGGAAAACATTAGCGACATTTACCTGGTGAGCAATCAGACATGCGACGGCTTTAGCCTGGCTCTTAAATTCACCTAAGAATGGGAGCAACCAGCT    | 4 |
| wt-97890-98010 | 5094 | GGTCATCAGCCGCTGCGCAAAACGGACTCAACGTGGTCTCCTCTTTATCTCCATCCTGAAGCAGAGCAGCTCCGCCCTCAGGGGCATCTCCGTGAGTGTAAACCCCTGGAGACTCT     | 4 |
| wt-98010-98130 | 5095 | TTACGGTTTCATCTCAGTGGAAAGACCTGTTTGGTGCCAACTTAAACAGATACGCATGGCATCGCGGGGCTAGACCTCTGGCTGGATGAGCACGTTGGAAGAGGAAACAGGAGATTGGT  | 4 |
| wt-98130-98250 | 5096 | GTGAAAGGAGAAAACTGCTTCTCCCGACTTATGGCTAGATTTCTACAACCTCAGCCCATCTCCAGCGCAAGCTTGTGCTGTTTATGCTGTCCGACCGCTGCGGACTCAGGCC         | 4 |
| wt-98250-98370 | 5097 | ACCGTCTACCCAGAGGAGGACATGTCATGGCTGGGCCCGCTTTTTCGACCCCTCTGATATTAAGTGGTTATTTTGGGCGAGGACCCCTATCAGCGGGGTCAAGCAACCGCCCTGGCA    | 4 |
| wt-98370-98490 | 5098 | TTCAGCGTCGCATACGGCTTTCCAGTTCGCCCGAGCTGAGGAACATCAGCAGGAGCTGCACCGAGGCTGCCGGAGTTTTCTCCCCAGATCAGGGCTGTCTAGACCGTGGGCTCC       | 4 |
| wt-98490-98610 | 5099 | CAGGGGGTGTGCTACTCAACACCATCTGACCGTGCAAAAGGGCAAGCCCGGCTCGCACGACAGATTGGCTGGGGTGGTTACTGACCAGTAATTTATTGCTCTCTGAGCGGTTA        | 4 |
| wt-98610-98730 | 5100 | AAAGCGTGCCTTTATGCTGTGGGGTGCAGAGGCGGGAGACAAAGCTTCACTAATCAACTCAAAGAAAGCATCTGGTTCTGACCTCTCAGCATCCCTCTCCCTGGCCAGAACAGCACC    | 4 |
| wt-98730-98850 | 5101 | CGAAAGAGTGCCAGCAGAAAGTCTCGGGCAACAACCACTTTGCTCCTCGCTAACCACTTTTGGCTGAGAAGGGGCTCGGTGAGATAGATTGGAGGCTGTAGAGGGGTATCACTATGGC   | 4 |
| wt-98850-98970 | 5102 | CATGTTTTGAAGTCGCTGGGGTCCGGTCTTTCAGGGACCCGCGCTTTGTCGGACAGGAGGAAAGACTTTCACAGCAGCAGCAGCTACACTCTGGGGTCTCAGGCCCTCCAGTCTAT     | 4 |
| wt-98970-99090 | 5103 | CCAGGAGGAGCAGTGAAGTACTGACTACTCAGATGAAGACGAGGAGATTGATTTGGAGGAGAGTACCCAGTACGAAAGACCCATCTGAGGGCAGTGATAGCGACCC               | 4 |
| wt-99090-99210 | 5104 | CTCGTGGCATCTCAGATTGACAGCAGTCTGACTACAGCAGAGCGACGAGGATGAAGCAACCCCGGCTCTCAGGCCTCAGCATCTCAAGAGTCTGCCATCTACCAACAGTCTTC        | 4 |
| wt-99210-99330 | 5105 | AGGTCTGACACCCAGCCTTCTGTTCTCCGACCAAGCAGCCCGGGACCTCCGAGGCGCGGCTCCCGCGCGGTCAGGGGACGGGCTCAGACCTCCAGGCCACCAGCCCAAGTTCA        | 8 |
| wt-99330-99450 | 5106 | GCAATCCACCAAGACAAGGTTCCCACTAGACACTACCGACCTGACTTAGAGGCCAGCTCCAGCCGCCCTCCACCTTCAAGTCCCAATACATAAACAACATGATGAAAC             | 4 |
| wt-99450-99570 | 5107 | CACCCGCCCATTAAGGGCAATAACAACATACTGCAATGGCCATGGCTGTAAATAAAATGCATAAACCTGGAGTCTGATGCTGTGTTTATTCAGTAAACCAAGTAGTGGCGTGGTTCT    | 4 |
| wt-99570-99690 | 5108 | TTAGGGCATCCACGATGAGCCGCTGCGGGGTTCCCTCCCAAGTATCATCTCGGATAGGGGATTTCTGTCATGACCACGCAATTAGAGTGGCGGGCCCGGGACAGCGCCACATACA      | 4 |
| wt-99690-99810 | 5109 | CATGGCCGGTTGATGTTTCTGTGGCTGCCGAAGCAGATGGCGACTTTGTTTAGGGACAGACCTGGGCTTGGCTATGGTATGGCCAGCTTGGAGTAAAGCCATAGTCACGGATGC       | 4 |
| wt-99810-99930 | 5110 | TGCAGAGGTTACGGACTTGTCTCTATCGTCTCATACAGTTTGTAGTATTGTTCCAGGACGACACGAAAGCCTGCCTCATCTTGACCATTAGCCTGGGCATGCGTGAAGTCCAG        | 4 |

|                  |      |                                                                                                                            |   |
|------------------|------|----------------------------------------------------------------------------------------------------------------------------|---|
| wt-99930-100050  | 5111 | CGTCTGAGGCTGCTGCTTCTCCGATGCCAAAGAAGACGTGAGATGCGTGTAGCCAGAAGCGTGTAGTCTCGTGGTGGAGGCGTAGTCCAGGAGGCGGTGAAGGAGAGGCTCGT          | 4 |
| wt-100050-100170 | 5112 | CTGAGGTGAACCTCTATGTTGTGCGGAATCAGCATGTTGTTGGTAAATGTGCAGAAGGGGAGGTCCTGAACCTCCCTCCGCCATAGCGGACGGCCACATCCAGGCCATTGCCTGAAATAGG  | 4 |
| wt-100170-100290 | 5113 | CCCTGAGGTCAATTATATATGTTTAAACAGGGAGCAGAGGGGGGAGAAATTTGCGGCCGGGGGAGCCAGTACTCGGGCATAGAAGACAGCGGGGGCTCCGCTCCCATCCAGGCCAACC     | 4 |
| wt-100290-100410 | 5114 | CCAGCGGCGAGTTCGCCAGCTCCATCCAGCAGTCACTCCGGATCCACGTAACGCCCGGGGACAGGGCAGCAGCACAAGCTCCGCCACGTATCCCGGTTTTACAGAGAGAATGTCTCT      | 4 |
| wt-100410-100530 | 5115 | CGTGGCTAAAAGCGTAGATGCTCCGATAGATGAGTTCGGGCCAGGAAGCTGTAGACAATACTCGGGTGTCTATGCCCGTGGGCCCTCCACGAAGCTGTCCGCTCGAGCGTGCCTAAAGT    | 4 |
| wt-100530-100650 | 5116 | CCCCGAAGGTGCGGTATAGCCACAGATGGACTTTTTGGTCTGCAGTGTGACCCAGACCCAGCTGTGCTTACGTTGACATGTAGGTGACCTTGACCCGTTCTCGTCTGCTCGT           | 4 |
| wt-100650-100770 | 5117 | TGCCACCCGGGACCATGCTTGGTTCGGCCCGCGGTAGAGTGGGGTACCGAGCGGTGCAATAATTCTTTTGGAGCCAGGTGTGGGCCGTGAGGCCCGGAGCCGACCCAGGGTCTTGTACTGGG | 4 |
| wt-100770-100890 | 5118 | CCAGGGGATCGAGGAAGACTCGCACTCCACCGGGAGGTAACATGGTACCCTCCGCTCCCTCCCGGGTCCCGCGCGGGCAGCAGCCCTGCCGCGAGCTTGTAGCGTGGCATGGA          | 8 |
| wt-100890-101010 | 5119 | GGGTGGTGAAGAGGCTTGACCTCGCGTGGGAGAGGAGCGGGTCCAGCCAGCTACTGCGCGGGTCCATTATGGCCGCGCTGGGAGCAGCAAGCGGTGAGCTAGGCCAGGA              | 8 |
| wt-101010-101130 | 5120 | TGTCGGCGAGAGCTCGAGGCCGACTCGAGGGTCTTATGAGGTGCTCCAACTGGACGTGCGTGCAGCGCTTGTGTGATGAAGAGGGCCAGTTGCGGGCCAGCTCCAGCTAGGTGCG        | 4 |
| wt-101130-101250 | 5121 | CGGCCCTGGGTTGCCACCAGGAGGTGAGGATGTTGTCGCACTCGCAATCTTGTACCTGGGTCTGTGGCTAAAGGAGGACTGAAAGCGTCTGTGCTGGTGGGAGGCCACGC             | 4 |
| wt-101250-101370 | 5122 | AGACGATCGAGGAATGCGGCCCGCGGTGCTCCGACTTTTTGAGATCTGCAGGGAAAGTACGCTACGCTCCAGGGACAGACCATCTACGCCAACCTCCGCAACCCCGGAGCTTCTCGAGGC   | 4 |
| wt-101370-101490 | 5123 | CCACGATCACATTGGTGGTCCATAGCTGCCCTGGTGCATGCTCTCAGGACCTCAAAGCGGGGCCAGAGACTCCCGAGTAGAGCCCTGGGCTGGTTCGCTGAACTCGCGGCAA           | 4 |
| wt-101490-101610 | 5124 | TGTCGGAGAGTACCAGCCAGTATTTGGCCAGGTCGGCGCTGGAGTTCCTTAGGGCGCGCTCGTAGAGCAGCCATGACTGCTGACCCGCTGCGTCAATTTATGTCGGCGCTTCTGA        | 4 |
| wt-101610-101730 | 5125 | ACCCAAAGGCGCTATAGACGGTGGGCGTAGGCTCGGAGTGTCTGGGAGAGTTCTGTGCGGCCACGGTTGTGGCTCCGTGACCAAGCAGCTCCATCGTGTGGTGGAGGCAGCTAACGC      | 4 |
| wt-101730-101850 | 5126 | TGGTGTCTTCCAGCCCCCGCTTCCCGTAATACATAGGCTGAAAAGGGCAGGAAGGGGGGCTCCGAGAGCTCCGGGTCAAACCTCGGGGAGAACGCTCCATATCCGGGAGTTGTT         | 4 |
| wt-101850-102090 | 5128 | TTCCCTGTTACCCACGCGCGCTCGTCCGACTTTTTGAGATCTGCAGGGAAAGTACGCTACGCTCCAGGGACAGACCATCTACGCCAACCTCCGCAACCCCGGAGCTTCTCGAGGC        | 4 |
| wt-102090-102210 | 5129 | AGGTGTTTACCCATTGTTTAAACAGGACATCTCATTGCACGTACGATGACGTGCTACATGACTGGAACAAGTTCGAGGCCGTCATCCAGAAGCGATGGCCGAGCGATGACTCGTGTG      | 4 |
| wt-102210-102330 | 5130 | CGAGCCGGTTCGTGAGTCCACCTCGAGTCTGGTCCACGACCATGAAGCTGACCCGTCGTGACCTGCTGACCAACATCTACCGAGTGTACACAGCCGCTCCGTGCTCTCTATG           | 4 |
| wt-102330-102450 | 5131 | AGCGTATTGTGGACTGGATCTGCGCCACCGGATGCTGGCCCGCTTAAAGAACCCATAAACCAAGAGCTCCAACCTCAAGATAAAGAGCCTGAGGGACAGGTGCGTCTGTCGGGAATTGG    | 4 |
| wt-102450-102570 | 5132 | GGCAGGAGAGGACCATCAGGAGTATCGGGACGGAAATATAGAGGCAACGAAAGAAATAGAGTCTCAACTCCACGTTTATCCCGAGTTTACGGAGGTGACCATCGAGTACCTTC          | 4 |
| wt-102570-102690 | 5134 | AGAACCCTTTCATGCTACCGCAGCTGGAGCATGCAAGATCTGCCAGCTCTGAACAGGGCCCTTCAAGGCCATCTGTTGGCCAGGGGGGAGAGCATGACAAGGCATCTGG              | 4 |
| wt-102690-102930 | 5135 | CCCATCTGGAGCAGAAGTCAACAGCCAAAGGACCCAAAGGAGAGCTGCTGAACTCTGCTGCTCAAGCTCTCGGAGAACAGACCATCAGCGGGTCCAGCGAGTGGTGGAGGATTCTATAA    | 4 |
| wt-102930-103050 | 5136 | CGGATGCTCCAAACACTGGTGGACCGCAACCCTGCTATTTGGCCAGCCGGGAGACAGCTGCACAGGGCTAAAGAAAAAGTCTCCAAACCGGTGGTCAAGTGTCTGACTGATCAGA        | 4 |
| wt-103050-103170 | 5137 | TAAACGAGCAATTTGACCAATTAATGGCCTAGAGAAGGAGAGGGAGCTCTATCTAAAGAAAGTCCGCTCCATGGAGTCTCAGCTCGAGCCCTCCCTGGGTCCCGGGCACAACCCAG       | 4 |
| wt-103170-103290 | 5138 | CGGCGTCAGCCCCCGCAGTTGCGGCGAAGCCGCTGTGATATACTGACGGGCGAGCCCGCTCCGCAATCGAAAAGCTGTTCAACTCCCGTCCCGCAGCCTGGGTGCCAGGG             | 8 |
| wt-103290-103410 | 5139 | TGTCTGGTCAAAATGAAAGCCTCAACAGTTCGTTCTCAATACATCCCCCTTCGCGGAAATGACTAAGATCTGACTGAACCTTTGGGAAAGCGAGCTGTTTAAACACTTCAAGT          | 4 |
| wt-103410-103530 | 5140 | TAAACCCCGTGGTTGATAATCAGGGGACAGCGTCTACGTCAGACTCGTGCAGACACGATCTATATTATTGGGCCCCCTCACTATCTGTTGGCAGAGGCTTACCCGTTGGAACCTCG       | 4 |
| wt-103530-103650 | 5141 | TGACAGATGTCTACGCCACCCTAGGCATCGTGGAGATCATCGACGAGCTCTACCGGAGCAGTCCGCTGGCCATCTACATCGAGGACCTCGTGCAAAATGTCGCCCGGAGCGGACCCG      | 4 |
| wt-103650-103770 | 5142 | GGGAGATCATGGCATCCGGCAAGCACCATCAGCCCGGGGGACAGCGAGCCGACCATGCAAAAAGTAAGCCTGCGCGTGACCCCGCCCTGGTGTGGAAGTTAACGCCATAACGCC         | 4 |
| wt-103770-103890 | 5143 | ATCTGCGTGGCCACCAAGTCCCTGAGTTCTACAATGCCAGGGGGGACCTAACATCCGAGACCTCCGGGCCACGTCAAGGCCCGGATGATCTCGTCCAGTTTTGCGGCTACGTCCTC       | 4 |
| wt-103890-104010 | 5144 | GTGAGTCTGCTGGACTCCGAGGACAGGTCGACCACCTCAACATATTTCCCCACGTGTTTCCGAGAGGATGATCTGTACAAAACCAACAATGTGAACCTTATGGAGATGTGCCCTG        | 4 |
| wt-104010-104130 | 5145 | CTCTCGATGATTGAGAATGCAAGAGCCCTCCATAGGCCTCTGCCGGGAGGTCGTTGGGTCGCGTACCCCTTTCGCACTCCAAAGTGAACAATCTGGAATCTGTTTCTGTACAATGG       | 4 |
| wt-104130-104250 | 5146 | GCCAGGACGCTGCTGCCACCCTGGTCAAGTACCAGACCTGGAGGAGGGGGCTGCCACCCCGGGCGTGGAAATGAGGGCCTGAGTCTCTTAAAGTGCACAAGGAGCTGAAGCGCGCC       | 8 |
| wt-104250-104370 | 5147 | CCATCCGAAGCCCGGACCTCATGACAGCCCTTTCTGACCTCGGGGAAGATGGGGTGCCTGGCCAGGTACCCCAAGGATTACTGCGCGGATCAAAACAGGAGGAGATGCCAACTCG        | 4 |
| wt-104370-104490 | 5148 | GGCTTCACATTTAACTGTTTTATCAAGATTCTTTATGACCAAGCATTCCAGTGCCAGACCGTCTCCAGACCTTGAGACGCAAGTGCCTCGGGAGTGACACGGTCTCAAAAATAAT        | 4 |
| wt-104490-104610 | 5149 | CCCTAGAATAAAGTGAAGACGTCATCAGTAAATCTGTCTCGCTGATTTCCATAGGAATGGTGTAGCCGGGTGGAGGCCGATACATCAAGCAGAAAGGCCATAATCTCTCGA            | 4 |
| wt-104610-104730 | 5150 | AAGTAGCGGTGGGGCTGAGACATGCTCAGTGGCCGTCTGGCAGGGGGCCGGCGCGCTCCGTCCTTGTCCAGGAGACACAGTGGCTTCCAGAGAGCGCAGCCCCAGCCCTCCGACG        | 8 |
| wt-104730-104850 | 5151 | CGCTGAAGCCAGGCTCGCGGAAGAGCCAAAACCTGTTTCCGGCGCCCGGGGGGCCAGTCTCCGGGTAGGTCGCGGACCGGTCACAGGTTGGTGGTGGGATGGCGGGCCCTGTCT         | 8 |
| wt-104850-104970 | 5152 | GCCTCGGGTCTCGCCGCTAGTTGGTCCAGGGTCCAGGAGAAGGCTTCGTGCCAAAACAAAAGGGCCCGGAGTGTCTCCATCCACCAGTAAAGATCCCTGAAAGATGGCCATC           | 4 |
| wt-104970-105090 | 5153 | AGTAGGCACCCGGGCCCGCTCGAGCCTCACCCGAATGTTGTCGCGGGCCAGGTCGCCTTCCACCCATACATCCCGTCCAGCGCGGCTGGCATCTCCGAGTCTTTCACGCCCTGTC        | 8 |
| wt-105090-105210 | 5154 | AGGAAAGCCTAGGAGATACAGCAACAGAAAGCTATTAGCCGGTGGTTCGCCACCATCATCTTCTGTTAACGGGAAAGATAAGAGTTGGGCAACCCCGGGGGCCGCTCTCCACC          | 4 |
| wt-105210-105330 | 5155 | CAGCCCCGCTCTCACCTGTGCTAGTGCTCTTGAAGGATGGGCGGAGTGTGGCCAAAAGCCAGGATGAACCTGTGCTGCATAAGCCAGGTCAGTCCTAGGTCAGCGCCGCGT            | 4 |
| wt-105330-105450 | 5156 | GTAGGAGAACCAGGTCAGCGCGGTGAGAGGCCCGGAGTGCCTGCGCTGTCTGAGTGCATAGCGGTGAAGGGCCCGCAGCCAGGTTTGGCGCTCCCGCCCTGCCCTCCGCCAT           | 8 |
| wt-105450-105570 | 5157 | CAGGCTTCCACGGGGGCCCGCTGGCAGAGAGGTGGCAGCGGGCAATTCTGAGGCCACCAAGTGGCATCAGCTCAAGGATGGTGTGGCCTCCGCGCGCCGACCCGCTCGTCT            | 8 |
| wt-105570-105690 | 5158 | CGTCTCCCCCTCCCTCGCCGCTTCCCGCGTCAAACGTTGGCGAGGTTAATCTCCTTTCCGGTCCGGGGCCAGATTTGTTGAGGAGCAGCCAGCCGCTGTTGCCCTGACCCG            | 8 |
| wt-105690-105810 | 5159 | CGTCGAGGCCCAGGAGGGCTGCTGCCAGGGGGCTCCAGAGACTCCAGGTTCCAGGTCCAGTAGCAGGAGCCCTCGTGTGGCGCCGGTGCCAGAAGGCCGCGCTGCCCTGCCA           | 8 |
| wt-105810-105930 | 5160 | CATAATGGATGGGACAGGAAGGGGAAAGCCCGGACATAGGGCTTCTGAGCCCTGGCAGAGTTCGGGGTCCAGGAGTGAAGATGGCTTGGTGCCTCTGTGGTGGCGTAGC              | 4 |
| wt-105930-106050 | 5161 | AGGAGGCATAGATACTCGGAGGAAGGCGTAGAGCCCGCCCGCCACTACTCCAAGATTGACAAGCCAGGACTCGAATCCCAAGCGGCTCAAGAATTTTCAGGCTGACCGGCTGCC         | 4 |
| wt-106050-106170 | 5162 | GTCGGCGTCCCAACCGCCGGTGGCCCGTGGACGACACCAGATCTACTTCATAAGTGACCGGTGCGAGGATGCTCCATAAAGGGGACGGGAGAGGGGTGCTGGGAGTCTGGTGG          | 8 |
| wt-106170-106290 | 5163 | AATAGGTGAAAACATCCCACGCGGTGCTGATGTATACGTCAACTGTCGGGAGACTCAGAGTGCCTCTGAGCATGGGGCATGCTGTTCGCCCTCCATCTCGGACCCGAAGCCAT          | 4 |

|                  |      |                                                                                                                        |   |
|------------------|------|------------------------------------------------------------------------------------------------------------------------|---|
| wt-106290-106410 | 5164 | CAACAGGTGGGGTTGTTGGTCCCGCCCATCATCCCCGAGCAGCTTTGGCAGACCACCTGTGCTGGAAAGAGAGGCTGGAAGATGAGGCCCTGCTCATCTCCACCTGGCGGGGACA    | 4 |
| wt-106410-106530 | 5165 | AGAGTCTCGGGTCTCGGGTTCTAAATGAAAGGTCAAATAGTCCCTTCTCGGGCGCATCGGCAGCATAGCAATAGCCCCCGCTGCGCTGAGCTCCCGCTCCCATCGCAAAAGTTGA    | 4 |
| wt-106530-106650 | 5166 | GTTCCGGTAGTCGAGGGCGCGTTGACCACGGGGGCTCCAGGGAGCTCCAAGCGGGCGTGGCAGGCTGCACCACGATCAGAGTCTCAACGCTCCTCCCTTTTGTGGGACGATGCCCA   | 8 |
| wt-106650-106770 | 5167 | CGACCCAATCGCCACCACCGCCCTGCGGTCTGGGTAAACATATAAAAGGTAAACGAGCTGACGCGGGCCCTGACGCTCTCCGCGGGTGTTCATCATTTGTTGAGATCTGAGGAGGA   | 4 |
| wt-106770-106890 | 5168 | CTGGACCCCTTAAACATCCGGTCAACGCCCTTTGCAAAATATTTAAAGGTGAATGCTCAACTGAGACCATCGCAATCATGAAGTCTCCAAGATGACACGTTGCTATAGAAGCGTG    | 4 |
| wt-106890-107010 | 5169 | GTCAAAACGCTTGTGTACTTTGTGATGTTTGATGTCGGCGGTGGTCCCATACCAGCTTTCCCAACCTGGGTACCCTGCTACTTTAACCAGCACTGGTTGATTACGGGGCA         | 4 |
| wt-107010-107130 | 5170 | CTTAACCTGACCAATTACAACCTGAGCCACCCAGCTCATCTTGAGCCGCGGAGATGTTTCCGCTCACACTGCTCTTTATCGCGGACTGGCTGGCTTTTCATCTAC              | 4 |
| wt-107130-107250 | 5171 | TACGCTCGCGGAGGTGGCGCTAATCAAGGCCGAAAAAGGTCTCGGGTCTACAGACCTCTCGGCTGGGTCTCGGAGTGGGTCTCCCAACCGTCTGTTTTGGCCATCTCAAG         | 4 |
| wt-107250-107370 | 5172 | CTCTGGTCCATACAGGTCTTCATCCAGGTCTTCTCTACAAGCACGTCTTCTCTCGGCTTGTGTACTTTTGGCACTTTCTGGCTCAGTCTACAGCCCTGCGCATGTGTGACCCGC     | 4 |
| wt-107370-107490 | 5173 | TTCTCCCGGCTCGGTGGTCAAGGCCAGGACAACCTTATCCCAGGACACCTTCTGTGGTGGTGGTCTTCTACCTGAAGCCCGTAGTTACAACCTGTACCTGGGTGCCTTGCC        | 4 |
| wt-107490-107610 | 5174 | CTGGAGACGCTGGTCTTCGCTCAGCTGTTCTTGGCCCTGGCAACAGCTTTTACTTTATGGTGGGGACATGGTGGGAGCCGTGAACCTTCTCTATCTGCCCATCTTCTGG          | 4 |
| wt-107610-107730 | 5175 | TACATCTGACGGAGGTGGCTGGCCCTCTCTCCGCGCAACCTTTGGCTTCTACTCGGCGCATGTTTCATCGCTCCATCATCTGATCTGCTGCCCTTGCTCAGTACGAGCCGCTCTT    | 4 |
| wt-107730-107850 | 5176 | GTCTCCGCCAAGCTGCACACCAGTGGCCATCAATGTGGCCATCATACCTATCTCTGCTCGGTGGCCATGCTCATCAGGATATGCCGGATTTCAAAGCATGCGCCAGGGCACTGAC    | 4 |
| wt-107970-108090 | 5178 | AGGTCAACCAGGAGACAGAGGCCCGTCTACCCAAGCCCTGCTCTCCTCCGTTTACCGATGACGACGGACAGGAGGAGAGATCTCCCTAATGCAATAAAAACCTTAAACACTGA      | 4 |
| wt-108090-108210 | 5179 | GGTACTTTCCCGTATTCTTTGCGGGGAAACGAGGGGAGCGGGAAATTGGGTTAAGATAGGGGCGAAGGGTGGGGTGGGTGCAAGAATTGGGGCTGGGAATTGAGAGGGGAGTGGGCTA | 4 |
| wt-108210-108330 | 5180 | GGTCCGACACCGGGTGCCAAGATAATGGATTGAGTAAGCATGGGGCTGATCGGGTCCCGGGTCTCAGGGGTGTAGTGGTGGGCATTGCATTTTTGGCCGGTGTGTTGG           | 4 |
| wt-108330-108450 | 5181 | GCTTTGGACTCGGGGTGATCATCCGACCATTACCCGACCCGACCCGACCCGAGTCCACAGCCACCGCCAAAGTCTCGGCTCCACCCACCGTTATGCCCTCCCTTTACCCATTAATAC  | 4 |
| wt-108450-108570 | 5182 | AAGAGATGTTAGTTGGTTTTTATTGGCAAAACAGCAATTATCATTTTTCAGAGTCTCATATATTCAGAGCCCTCGTTGGTTTCCCGCAGGCCCTCCCTTCTCGGCCGCTATT       | 4 |
| wt-108570-108690 | 5183 | AGCTTAGTAGTCTCCAGGTTAACTCCTCATAGTCAATTATACAGGTTGATTATCCCCGTCACAGTCCGCTATGGAGTTGACTCGTCTGGCAAGAGACCAGAGGGCACCCATGGCG    | 4 |
| wt-108690-108810 | 5184 | CGGTGCAAAAGTATTGTCTGCGTACGCTTCCAGGAGCCAGCCGCGGTGCTCAAGGCTTACCGATGACAGAGTCCGCGCAGGACCAGGGTGTCAACGACCCGCCAGGGAAATCTCCA   | 4 |
| wt-108810-108930 | 5185 | CCGAGGCTCCAGAAGCAGGTCTGAGCCAGGCTGACGGCCGCGGTCTAGAGGCGACCGTTCGAAAGAAGGCCGTCACAATGTTCAACCCGGGTGAGCAGTCTCCCGGCTTGC        | 4 |
| wt-108930-109050 | 5186 | AGCCCCACTGTGGCGAGCTAGTCTCCAACAATTTGTATTGGAGGACACTGGTAGAAGTAGTTGCGCTGGATTGATGAAGATGTTGACTGGGACCCGCTTTAATACCAATGC        | 4 |
| wt-109050-109170 | 5187 | GCCCCGATTTTTCGTTGGTCCGCTATTACGTAGAGCATAGACTCCACCCCTGTTGGCAGTAGGCTGTCTGCCACCAGGTCATGACCCGGGCCAGTTTGCCTTACGGACATCTT      | 4 |
| wt-109170-109290 | 5188 | TAAGATCCAGGCCTCATCTCGCTCAACAGATAGTACCCTCCGAGGGCAACCGCCATCCGGGACGTACTCCACGGTAGGACGAGCTATAGAATTGATAAATCTGATAAATGACCTCT   | 4 |
| wt-109290-109410 | 5189 | TGCATGGCTCTTGTAAAGCCAGTGTAGGATGGTAGATGGGTCAAATTCGACTTGGAAAAGAGGACTTGAAGCGGCACCTAATCTCATAAATGACAGTCCGGTGGTGAACAGTA      | 4 |
| wt-109410-109530 | 5190 | TAAAGTCTCCCTGTGACTCCACATTGACGCAAAAGTCCAGAGACACCCAAAAATGCCATCCGTGGGACTAATCATAAAGCAAAATGACGGTGGCGGATGCGTCCCCGAGATGAGCT   | 4 |
| wt-109530-109650 | 5191 | TACAGCAATGTCTTGACCGTCTCCTCACCCGACGCCCCAAAGGCCACAGTCCGCCCCAAAGTAGTATTTGTGGAGATGGAGCTGGCTCAACACCTTGGTGGTCCATCTTAATGG     | 4 |
| wt-109650-109770 | 5192 | TGGAGAGCAGCTTGGAAAGAGAAATATGCCATTTCCGCAATATGCTCCACATCAGGTTCTCAGACTGCCCCCTGGTCATGGACTCCACGTACGAGCAGAGAACAGTCTCTGCTCGG   | 4 |
| wt-109770-109890 | 5193 | TGGCTCCTGTAGCCCCAGTAAATGGATTTCAAGGGAGGACCGTCTTGGTGTCACTTCTTGGACTAACGAGGAGACAAAGTACACAGAAGCCAGTTTACCAGAGAAGCTCTGTATTT   | 4 |
| wt-109890-110010 | 5194 | GTTTACAGAGGCAATAGAGATAGACAAGCCGATGGCCGGCATCTGAGGTGGACGGTCAAGGTTACGGACAAGGGCTCAGTCTCCGGACTGCGGAGGAGGCGGCAACCGTGTAGGAGG  | 4 |
| wt-110010-110130 | 5195 | TCATCTCCTCATGGGATCCTCGAGCTATCCACGTCGGCCATCTGGACCAAAAGAGTCTGCTGCCAAGAGTTCAGTACCAGACCTGGAAGATGAGGGTGTCAAACCGTGGCGGACAG   | 4 |
| wt-110130-110250 | 5196 | TGAAGAAGTAGTCTCTTGAACCTCTTTAAGGCTCCGGCACCCTGCAAGAATTGACTCATATATGCTCCCGGTGACATCCACGCAGGACTCTGCCACACGAGTCAAGCCCATG       | 4 |
| wt-110250-110370 | 5197 | TCTAAGTTCAGGTTCCACATCTGCGACAGCACCCTCCAACAGCACACCCTTTGGGGTCAAATTTGCAAAAAGTAGAGCGGGTCCGATCGGTCAAATCCCATGTCAGGTTGGGTAGGGG | 4 |
| wt-110490-110610 | 5199 | ATGTGCCAGCCCCCTCAAGATGTAGCACTTGTCAAAGGCGAGAGGGCTTATAGGTTGCTTGGCTATAGAAAATGGTCCCTCTGGCAATAGAGGCGATAGAGCTGCCGGCCCTTA     | 4 |
| wt-110610-110730 | 5200 | GAAGACTTTAGCCGCACATCCAGCATCTTGTTCGGTCTGGAGGGAAGCAGTCCCATATCAGTCAGGACCAGGCTACCATGCCCCACATGGTGTCTGTGAATCCACCAGGATGTTG    | 4 |
| wt-110730-110850 | 5201 | CTGGGGCTAATGTCGCAATGGAAGAGGCGCAGTCCGATTACAGAAAGTAAACGGCATCTTTGAGGCCCTGAAAGCCCGCACACAGGGGCTCAATACTACCATCATGCCAGTGCCATAA | 4 |
| wt-110850-110970 | 5202 | TCCTGGAGACTGCATCTGAAGTGGGCATAAACAGGGCGTGGCAGGACGTCAGGCGGACAGGATGTCACCAGGGCTTGTCTGCCATCTCTGGCCGTGGCCTTCCAACTGAATC       | 4 |
| wt-110970-111090 | 5203 | ATGTCACACACCATGAGCTCGTGATACAGCTCCGTACAGAGTATAGAGTTTTGACCCTGGCATTATCTGCATGTGCATACACGGCCCGTAGCTCCCGCCCGCAGCAGATACTCGCAG  | 4 |
| wt-111090-111210 | 5204 | GTAATGGGAGGTGATCACAGCGCTCATGTTCTCCGGCAGCTTTACATAGAGGGTCTCCGTGATGTCATCAATGTTGGTCCACTTCAAGGTGTTGTGCTGAAAGGTGAAGTAATCAATG | 4 |
| wt-111210-111330 | 5205 | ACAGTCACTTCCCAAAAAGGCGTGGTCTCTCGAGGGGGTTCTGGGAGACACTCAACTCGCCACTGCTGGAGGAGTTCGTCGGGCTCAACTCCGACGCATATTCACATCCATGTTT    | 4 |
| wt-111330-111450 | 5206 | CTCAAATGGCTCGAGGGCTGTGCGAGCTGCTCTGGCCTCAAGCTCCTGCTCACGGAGCTCCTCCACCCGCTAGCTGCTTGTAGTTGATTTTTGAAAATGAGTCTTGTGCGGGT      | 4 |
| wt-111450-111570 | 5207 | GACCACCTCTGATAGGTAGAAATAGTCTTTGGACTCAAACTGCTCCCTTGGCTGGCGCAGGACTCTAAGGACCCCGAGCAGATGTAAGTGTGTTTCAAACAGAGCGTGGTCCCT     | 4 |
| wt-111570-111690 | 5208 | CCCAAATCTGCACGTGCGCTCACAGCGCTCTTTCTACCAGGCTCTTAGTTGCTGGGCCACAGATCTCGCTTAGAAGTCACTCACTTCAAGTACCATGTCCGCAACTG            | 4 |
| wt-111690-111810 | 5209 | AGCCAGATCATACGTGGGGTACAGTACGGTGTTCAGTGGAGGCTTCCCGTAAATTTCCACAGCCTCCACCATATATCTTTGCTCCTCCCGTTAGAATTAGGCAAGGATCATACG     | 4 |
| wt-111810-111930 | 5210 | TGTCACCGGCTTTTATACTGAGCGTTTGGTTTGTATGTAGCAAGCACAAAAGGCACACAGAGTATGCAAAAAGGTTCTGAGGCAGCAGGACAGCTGTTTGGCATTAT            | 4 |
| wt-111930-112050 | 5211 | TCAGGCGGCTAACGTCAAAGGAGGAGCTATATCCCTACCCTCCAGTCACGACGTCACCAAGTACAGGGCATAACACACCTGTTGAGGTGTGCCAGGAATGCCCTATGTTGGCACATG  | 4 |
| wt-112050-112170 | 5212 | GTGATAAACCCGAGTGGGTAGCAGAAATAGGCCCTTTTGGCCGTCGCCGACGTAACCGAGCTCTCCGAGTGGGACTGGGGCTAGAAGAGGGCCACATCCAAGGGA              | 4 |
| wt-112170-112290 | 5213 | GTGGTCTTACGACCAGGGAGTTCAGGTTGGAGTGGGCCAATTTGCAAGGCTGACCTATAACCTCTTGTTCAGGCCACGCAATTCGATAAGGTTCCGCAACTG                 | 4 |
| wt-112290-112410 | 5214 | CCTCAAACACAGACCATGCCATTTTCAAGCTGAGGGGCTTCAATCCGGCTGACCAACCTTGTCCACCAACTGCCATTTCTTGGTAAACGGGGGTTGAGGGGCAAGAGCTCCAAAG    | 4 |
| wt-112410-112530 | 5215 | CCAGGCTCGAGAAGTATAGTATCTCTCGCCACACGGCCGAGCTCCGGGCTCTGTCAGGAGGCTGTTGCTGGGGGAGGATATTGGACACGAGCAGGAAGCTCTTGTAGTGGCTCT     | 4 |
| wt-112530-112650 | 5216 | CCACCAGCTTAAATGCTCGGGCGTCTCTGGCAGGCTCCAGTGCCAGTTCCAGACACTGCCATACCTGCGGGCGAGCATCGGGTATCGGGCATATCGGCCTTACCCTGTTGAACA     | 4 |

|                  |      |                                                                                                                           |   |
|------------------|------|---------------------------------------------------------------------------------------------------------------------------|---|
| wt-112650-112770 | 5217 | TGCTGTATGCCTCGCAGCGCGCCGCTGACCGGAGAACCTAAGAAACGCCCTTACGACGACAGCACCACGCAAGGCTGCCTGGTGCCGAGACCCGAGTATTATGTACACAGGGGCCA      | 4 |
| wt-112770-112890 | 5218 | AGTCAGACAGGTGGGCTCACCTCTGTGGGCAACAATCACGCCAGTAATTTATATTGCCAATGCTTCGAGCATACTGCCGCCACTATGGCCCCAGGCCGGTGTGTAGCTTCTGATG       | 4 |
| wt-112890-113010 | 5219 | AATCATTACCCATGTTCCGGTGGAGCCCTGCCCTTCACACCCCAGTCCAGGTCCAGATGTGCTACTACCAGAGCTACGGCAGACGTTACAGCGCCTGCTGCCACCACCCAATCTTGAAG   | 4 |
| wt-113010-113130 | 5220 | ACTCCGAGGCCCTTACGGAATTCAGAACCCAGCGTGTCTCTGCCCGTGCCATCTTGTAGGACCCCAACTTTTTGGAGATGAGAGAGTTTGCACCAGCCTGGCCAGCTTCCTGAGTGGTC   | 4 |
| wt-113130-113250 | 5221 | AGTACAAGCAACAGCCCGCCCTAGAAAGCATCCAGAAAACAGTAGTGTACATCTTTTTATTCTGTATCTCAATCAAATCTTTAGAGATTACAGACACCATGTTTGACATCTTTC        | 4 |
| wt-113250-113370 | 5222 | AAAGTGCCTTTCGGATTGGAAGAAATGACGCTGGGAAGCTGCACATTTTAAAGCAAAAAGCCAGCGTGTTCCTTATCCAGCGCCACGGCAAGACCTGGATAGTGTGGCCATCATCA      | 4 |
| wt-113370-113490 | 5223 | GCCCTCATCCTCGAAATCTCTCCAACGTGCAAAATAGGCTACGTGCTTACCAGAAAACCTGTCCGGTGCACATCGCATGTTAACTGAAATTTATTGACACCTGACCAAGAGCTTCCAAAGC | 4 |
| wt-113490-113610 | 5224 | GTGTAGAGGTCAACAAGGAGACCCAGCACCATCACGTTTAGGCACAGTGGGAAAACTCCAGCACCATAATGTGTGCCACCTGCTTCAATAAAGATGAAGACCTGACGTTTCAGTACTTG   | 4 |
| wt-113610-113730 | 5225 | GCAATTGTAGAGCATAAGCCGCTGTAAAGGTGCAGAAAATCGCAGCAGGTCCAAGGTTGTGCTGTACATGGGACTCTTTCCCATTAGCAAGAACCCCTGACAGACACGTGACATGTC     | 4 |
| wt-113730-113850 | 5226 | CGGGTGCAATTTGGTGGGTTAAATCTCAGTCCACCAACAAGGGGGCATCTCCGGTGTGAACATCAGACCAACAAGCCCGATGCCAGTTATGGTACGTAGTGTGTTTCAGGGC          | 4 |
| wt-113850-113970 | 5227 | CGTGCATGGCAGCAGAAAGCAGGTGCCAGATGTGCTGGGTATCGTCTCCAGCCAGCCAGGATGTTACAGTGGGCCCCGGCACCATGACATGTACACATTCGCCGTTATC             | 4 |
| wt-113970-114090 | 5228 | ACATCTGGTTAGCAGGTTGATAAAATGGTGCAGTGATGGAAAGTTGGCATTTCCGGTGCACATCGCATGTTAACTGAAATTTATTGACACCTGACCAAGAGCTTCCATACCCAGGC      | 4 |
| wt-114090-114210 | 5229 | ACCACCCCGTCCAGTGGGATGATCTCCGAGGGTGTGATATCTTGCAGTCTCTACTGTTTTAACGGCGGTTGAGTGGTAAAGACGTGGGCCGGTGATCTGTGCAGGTGACTAC          | 4 |
| wt-114210-114330 | 5230 | AGGGTTACCCCTAATCTCCACAGGCACCGCCTCACCCACTGCATCTGAGAATACCCAAAGTACATGAGAGTCAAGCTGTGTGGCCCCGGACTGCCTTAGTGAAGAGAACCTCGGGCCT    | 4 |
| wt-114330-114450 | 5231 | GGCCACGGTGGCTAGGGTTCATTTGATGTAGACGGTTCACATAGTGGGCTTCTCTGGGCTTACGACAAATGAGGGTAAACATTCATGTAGGTTTTAGGAGTCCGGCTATCTGAGGCAC    | 4 |
| wt-114450-114570 | 5232 | GTACACAGCTGACACGGCGGTTGTGGCCGATAGACTTTCATCTGGGGCTAGAGGCATCGCTCAGCACCAGAGGCATCTTGTGAGGAACCTGCGAAGCTGTTCCCGGCTACTGTT        | 4 |
| wt-114570-114690 | 5233 | CGCGGCGGATGCCATGACGTGCCAGAAATATCCCTCTCCTCGGGGTTGAGTGCACAAATGGCCCTTAAACAAAGCCCCAGCAGCAGCAAAAATGCCTGCCCGTCCGATGTTGGTGG      | 4 |
| wt-114690-114810 | 5234 | CCAGGTGGACGCAGTCCCGTCAAGGGCTACTAGTGGGAAAGCAGCCCAACCAGCCACCCGGGGGCTGGAGTCGATCACCTTACCAGGCCGAGGCCCTTCTCATAACA               | 8 |
| wt-114810-114930 | 5235 | GCGGGTGGCTATCTATCCATAGGCAGGCATCCGGCTCTTGGTGCATGGAGATAGTAGCTTTCACCAACAACCTTCCCACTAACCCGTTCTGGACAGTGAAGAACGCTTCCCTGA        | 4 |
| wt-114930-115050 | 5236 | TCAGTCTGAAATTTTTATAGATACGGGAGTAGGAGGTGGGAATAACAACCTGGGAATTTCTTGTGTGCTGCCAGGCCATGTCGCCAGTTTTCCCTGAAGCTAGCAGAAATTCAGGGG     | 4 |
| wt-115050-115170 | 5237 | CCACTGAAATGAGGAAGCGAAACCTCTCTGGAGCTCCCAAAATGAAACCTCAGCAAGTCTGTTGCTGGGGAGGCATGGGTGACAGCTGTATCTGTCAGCTGTCGCCCTGGGCGC        | 4 |
| wt-115170-115290 | 5238 | TCAAGTCTGGATGTGACAACATAGAGAGCGTGGGGCTAAAATATGAGCAATTCCTGTACCAGGGCCCTGGACTCAGCAATGGCCCGACGGGCTTAGAGAAAGAAAGAACGGCACCC      | 4 |
| wt-115290-115410 | 5239 | TCGAGAGTGCCTCCAGCCGACCCCAACAGTGCAGCCAGTCCCTGCTCGGCCCTCCGCGCTTCCCAACGGCGCTGCCCGGATGTTGCTGGGTTTCTCAGAGGGTGGTGGTGGTGG        | 8 |
| wt-115410-115530 | 5240 | ACACAGAGTCTCAGCAGCGCCTTGGTCTCGGCCCGGCCCTAAGTCTGAGCCCCAGGCAAAAGGGCCGACTCCAGCGTGGCCCAACTCTGCTCCCTCTATTCTCTTTCGTTA           | 4 |
| wt-115530-115650 | 5241 | TCTCAATAGAAATTTGCTTGGAGTACAGTGTAGGGTGTGAGCTGGGCCGCGCCACCCGCGCATATGCTCTATACCAGCCCTCCGGGGGGCCAGGATCTATAGGTATGGGCTGCA        | 4 |
| wt-115650-115770 | 5242 | TAGCCGAGCAGACTCTGGACCCAGAGGCTCTCTGATAAGATGCCCGTGGTCCAGAGCCCTTTGGCCCCCTCAAAGAGAGACAGGTAATAAATCTGTAGTCCCAACCAGCCCTC         | 4 |
| wt-115770-115890 | 5243 | CTTCATCGTAAATCGAAGGGCGGCCAGTGGAAAGGGTGTAGAGCTTGGAAAGGCCCTCAGCAGTACACTGGCACACTGGTAAACGTGCCCGATGGCTAGGCCGTCCGGGCAGCA        | 4 |
| wt-115890-116010 | 5244 | TGCCCCGAGCAGCAAAACACGCGGCAGACCCCTCGTGGAGCCGCTCCGCTCAATCAGGGTGCATCGCTGGATCCATACATACGTGGTACTCGCCACAGCCCAAGGCAAGCAACCGC      | 4 |
| wt-116010-116130 | 5245 | TGTCGGGAACAATAGGTGCAGCAGGAGGGGGTCCGAGGCCACTCAACACTTGGTTGTCATGTGGACATCCATAGCTCTCTCATGCGTGGTACAGCATCATAGCCTGTTCT            | 4 |
| wt-116130-116250 | 5246 | GGTGGATTTAAATAACAGGGCCCGTAGACAGTCTTGTGAGTAAATAGAGATGATGACATGGATGTAGAGACTGAGGACCACATCCACCACCTTCTCGAGGAGGCCCCCTAAACAG       | 4 |
| wt-116250-116370 | 5247 | CATCAGGCAGCAAGGGAACAACAAGAAACAGGGCCGGATGTGAGGCCTCAGCGCCCCCTCTGATCAAAGAGGGCCTCGTGACCCCGGAGATGACATTTCTATTGAGAAAGTAGTG       | 4 |
| wt-116370-116490 | 5248 | ATAGAGGTGATTGACCACAGTCTAACAGGCCCTGGACTTGTTCAGGCTCCACTTGTCCCGTGGTCTGTGTCTTGTGGATCTCGTCCAGGGCCTCAGCGCGGCTGGAAATG            | 4 |
| wt-116490-116610 | 5249 | CGGCCCATGTAGTTGCTGTAAAGGGCGCACACCCTCCCTCATGGTCTCAATCAGGGTGCATCGCTGGATCCATACATACGTGGTACTCGCCACAGCCCAAGGCAAGCAGCGCA         | 4 |
| wt-116610-116730 | 5250 | GGCCATGCTCTCAGGTAACGGGAGATGGAATCCAGCTTACTATACGAGCAGAGTGGCGAGGATGGGCTCATCCGTGCCCCCTCCCGCCGGGGAGGCTCAATCGGCCCTTGGTCTGA      | 4 |
| wt-116650-116970 | 5252 | TCAGTGGGGTCCAGCTCAGCAATCTCCAAATCTCTCTCCCAATAGTGCTCGCTCTTATCTGCTCTTCAGAGCATCCGGGGGAGACATTTACCTCTGTTTGTGGACAGGC             | 4 |
| wt-116970-117090 | 5253 | TAACTTTTCAAGAAGGAGCCCTGCCGGCATCTGGGCTTATGCTTCAGAAGGATGCCAAGATTATCTTCATCTCGTGTGAACTCGGCTGACAGGCCACAGCTTTCTTTATAA           | 4 |
| wt-117090-117210 | 5254 | GCTGAAGGATGCTCAGGAGCGGCTGTGAACGTGGAAGTATGTGTGTCAGGAGCATCGCAAGATTTGACATGCAGGACAGCATGGTCTATGCCCTGCTTTCGCTGCACATCCC          | 4 |
| wt-117210-117330 | 5255 | GTCTACATACCATGGACAGCAACATCCGAGCAACCACCAACCTCTTCTGGACGGGCGCTTGAACCCGAGCTGATGGGTGACACCTCTCGCTGAGCCAGGGTAGCCGTCAGCCGCA       | 4 |
| wt-117330-117450 | 5256 | TGTGCGTGACGATGCCATCAACCAGCTGGAGCTCTGCCGGTGGACACCTCAACCCCGAGTAGCCGAGCGCTAGCCTCTCCCTCTACGTGTACGTTGATCCGGCTATACCAACA         | 4 |
| wt-117450-117570 | 5257 | CACATCCGCATCAGGCACCGGAATCGCCCGGTGACTCACGACAGGGCGGACCCTAACAGGGTTCATGCTCGTGGCCCTGGAACACTTCTCTCAAGGACTAACAGGGGAGCGTGCCCT     | 4 |
| wt-117570-117690 | 5259 | CTCAATCATTGGGGAATCCTGCCCCCTCCCTGCGCCTCGTGACACAAAGGACAAAGCAGTCCAGCCTGCAAGTGGCCATGACTCTGACTAATGAGAAGTCAAAGGCCCTTGGAG        | 4 |
| wt-117690-117810 | 5260 | GCTCATCTACGCAGTGAACACGGCCGCTTCTGCCAGTCAAGTCAACCTTCCAGCTCCCTCGATCCGCTCTCTATCTATCTCCAGATCAGGGCCATCAAGCC                     | 4 |
| wt-117810-118050 | 5261 | CATCCCTCCGCGACGGTACTCAACTACACCGGCAAGCAGCAACCTCTGACGAGCTGTGTTGCGCTAGTCAATGCTTCTCGCAACAACAGAGACACAGTTCAA                    | 4 |
| wt-118050-118170 | 5262 | GAAAGTTCATTAACACTTTATTGACTACACAGTCCCTTTGATAAGCGCAGGGTCTCGCGTGACGGCATTCTGTGACGAGGGCTTGTCCAGGGGCTTGTCTTGGCGGACATCATTAGCCCA  | 4 |
| wt-118170-118290 | 5263 | GCCGCAAAATCAGAAATTAGCATCAGAAAAGTGAAGCCCACAACACCAAGTGTCCAGAGAGGAAGACCGTAAGATAAAGATGGTGCCTCTCATCTGGAACGGTGGGAAGCTCAGCAGTT   | 4 |
| wt-118290-118410 | 5264 | GTTTTTGTGGCATTGGACGTCCTTTGGAGGACAGCGTGGGGGCCAAGGTGGTAGCGTGGTAATACGGGTAGTAGCACTGGTGGTGGAGGAGGACCTGGTGGTACATTGCTAGTCACA     | 4 |
| wt-118410-118530 | 5265 | CCCGTGGAGGTTCTGTCCGGCTCGGTGGCAGTGTGTTCTGTGACGTAACCTTAGTGGTGCATGATGATGTTGGATGCGTTGGAAAGTTGTTGGGACTGGTGGACAGTTGTCCAGTC      | 4 |
| wt-118530-118650 | 5266 | AATGTCACCGTGGTTGTTGGTGTGCTAGAATAGCAGTGTGATTTATAGGGCGCTAGCTGTTGGTCAAGGTCTGAGACTGGTGTGTTGTGTTATAGGACCCGATGCCAGCGTGGTGTAGTG  | 4 |
| wt-118650-118770 | 5267 | ACAGCCGTTGTGCTGTACGCTCCCCCGAGCCGCTGCAACTGCAGCTAGATGTCACAAATGAGCGTTGCTCAGAGATGAGTATCATGBCATAACAGCGCTGCCCTGTGCTGTGCGG       | 4 |
| wt-118770-118890 | 5268 | TGTGCCATCGGCTGAGACGCAAGGCTCCCGGCCCTTTTTATAGTGTGCTCCACCCCAACTCTACTGAACCATCACATACATGACCTCTCGAGGATGACAGGGAATGAGCGG           | 4 |
| wt-118890-119010 | 5269 | TCCGTGAGCCGGTCAACACGACATGCTCCGGTTTATGCTCCAGCTGCCCTGACCAGTTAGGACCCCTTACGGATGTCTTTAACGGCGCGTGCAGTTGGTACCACATGACGGCCTA       | 4 |



|                  |      |                                                                                                                             |   |
|------------------|------|-----------------------------------------------------------------------------------------------------------------------------|---|
| wt-119010-119130 | 5270 | AAGGCCAACACATCCTTGAAGCAGGGCGTAGGAATGGTACCAAACTCGGGGCCACCCCATCAAAGACATAATATGTCTCATAGTGCCAGTGATGATGCATCACCACCAGCACTCGCC       | 4 |
| wt-119130-119250 | 5271 | AGGACCCTCTGCATATCTTGTAACAAGGCGCCCTTCAAAGCTCGGCCACTGGCTCTGGTGACGTTAAATGTCTGTTCCATTAGTACAGCCCTGTAGATTGGGCACCCAGACTCAAAAAGT    | 4 |
| wt-119250-119370 | 5272 | GCAGTACATGAAGGGCAGCCGCCTCAAATCCACCATGACCCCCATGGCTGTCGGTGTGTTGGGGTAATAAGTACATTGTTAATGACCACGGCCGGGATAAAGGGTGAACCTTGACAG       | 4 |
| wt-119370-119490 | 5273 | AATGGATTGGTCGGACACCCATAAGACAGGGGCACCCCAAAAACACGCCCCACCCCGAAGCACCCTTGGCCCCCAACGGCATAAAGCTGGGCAAAAAGAGTGGGTTAAAACCACAAAGGCC   | 4 |
| wt-119490-119610 | 5274 | AGTAGGGCCAGGAACGCCAAAATAGCAGCAGTAATAGATGAAAACAAAGCTCAGCATGAAACACAGCGTGGAGGGCTCAGCTAGGGTCTCTGCCTCTCCATATAGACATCTTCCTTGAATCTC | 4 |
| wt-119610-119730 | 5275 | ATTCCTCACCGCATACTCGCTCTTCATCCAGGGGGCCATGGCTGCCATTCACGATTACAGGAGGAGAGAGTAGGTCGCGGAAATGTTGCCCTCTCCCTCCCTGCAG                  | 4 |
| wt-119730-119850 | 5276 | GAGGCAATGGTGTCATCCATCTCCGACAGTCGGTCTTCAGCTTTGGCAATGTTGTCAGTGGTTCGCGGTGGGGTCTGATTTTGATTCTGATCCTGGGATTGGCTCTCTCCCTCATTG       | 4 |
| wt-119850-119970 | 5277 | GCATGGATTGGCATAGGTGGTGTTGGCTCAGGCTCAGGTTCCGGCCCTGGACGGCAGCAGCCCGGGACGGTGAAGTCGTGGAAGGTAGAGGCCCGTCCCTCCCAGAGTCTGGGGCC        | 8 |
| wt-119970-120090 | 5278 | GGAGCCTTATAAAAGACTTCACCCTCTCCCGCTGGCAAGACACGCGCTCTGTGGACAGCCCATCTTCCTCCCGCTGATTGTGTGGCTGACGGTGCCGTGTTCCACCGCCATTTGT         | 4 |
| wt-120090-120210 | 5279 | TCATCGACCATTGGTACCCCTTTATCTTAACCAGCAAGTGCCCTCAGGGTCTCTTGAGAGTATGCCGCTGTGGCAAGCGAGGCCCAAAATTAATAGTATGCCAAAGACTGTAGGTA        | 4 |
| wt-120210-120330 | 5280 | GGTCATCATCACACGATCGGTGATAAATCATCCGCCACTGACAGGTATCCAGGTCATCCGGCTATCTCAGGGTCCATCCGGCACCATTTCCTGGAAGAGATTCAAGAGGTGCTGATGCTCATG | 4 |
| wt-120330-120450 | 5281 | CCGGATAAGGCCTCGACACCAGGCACACTGGCCCTGGGACAGAGGGTACCATTGTCGAAAGTAGAGACTCAGATTGTCCAGCAGGGCCAAAGGCCAAGGGCCCTGGCACCTCCGGGAG      | 4 |
| wt-120450-120570 | 5282 | GGCCAACCTGAGTGGTGGCCAGGTGAAACAGAGCCCAAGATGCATGTGTACATCGACATGTCTGCGTTCGCGGGAGCCTGCATGACAACCCGGGAGTACACGTAAACAGGAGAAT         | 4 |
| wt-120570-120690 | 5283 | CTTCTGCAGCACCTCCTCTGCTATGGCGTAGGCCAGCACCATGGGAAACCAATGTCCACATCATTTGACTCTAACTTCACGGTGGCATGCTCTGTCGAAAATACCGGGGGCATAACACT     | 4 |
| wt-120690-120810 | 5284 | GAGGCTCCCGTCCCATGCCACTGGA AAAAGGGCTGGTACTTGTTCTTAATGGCGTAGTCTGACTTGAACAATCTTGGTGGAGTACAAACTGTCCACGCTAACCTCATCCAGCAGCCG      | 4 |
| wt-120810-120930 | 5285 | CAGGGTGCAATCAGACAGGTAGTTGTACATGGACACGTAGTCCGGACCGTCTAGAGAGTACACCTGACCCAAGGCCAATCCCTGCACATTCTGCGTCCCGTGGAGTGAAGCCAGGG        | 4 |
| wt-120930-121050 | 5286 | TAAAGTCAGCCCAATCCTCTGTTGCATCTTGGCAATCTCATCGGTATACAGACGAGGAGAGACACTACCATTCAAATCCATCTTTATGACAATTATCAAAAACCACCTTATT            | 4 |
| wt-121050-121170 | 5287 | TCCAAACTTAAATTTCTTCTGACCGGCGCCACCTTTCAATTATATAGTGCCGTAATGGATGGGGCGTGGTCTGTTTACAGACATAAACTCATCGATGATGCCCGGGAGGAGGC           | 4 |
| wt-121170-121290 | 5288 | TGAGAGTCGGGGGAATGCCTCTGCAGAAAGTGCAGGGCTGCTCCAGAACACGTCAGTGCCAGCAATCACTACAACTGCACCTCTGTTGTTGCTGGTGGTGGTGGCCTCCAAGTCTG        | 4 |
| wt-121290-121410 | 5289 | CTGGCTGTA CTGTTGACCATGTTGATAGAGTCCCGTGTGTTGCCGAGAAAGTCTCCTGTTGTA AAAATGCCCGCAGGGGCTGTAGAGGCCCGGGAGCGCGCTGCGCGATAGGAGGA      | 4 |
| wt-121410-121530 | 5290 | GTTGTACATGATGTCACCCAGAGA ACCCAGCTGAGATGCCAGGGATTACAGTGTCCGGTATTCTATAGGCCGATCCGGGGCAGAAATGGTATAGATGAGCCCTCGGCCAACCCTCTG      | 4 |
| wt-121530-121650 | 5291 | ATTGTAGTTTTACAGGAGACCACAGCGGCCCTGGCCCTGGAGAGTTGACATTTTGAAATAAGCCAGCTTGCCCGTGACCGGTGTACGATAATCTCACAGTGGCCTGTGGCC             | 4 |
| wt-121650-121770 | 5292 | GTGGCAGAGTCTGGAGCTCCATTAACTTAGTATACCTGCCAGGTATGTCCTGGGGTCCCGAAGCAGCGTCCCAATTGCGCTGAGCGCCACCTTGGCCTGATGTAGTACTTACTG          | 4 |
| wt-121770-121890 | 5293 | CTGGTGGCAAAAGGCCTCGCCGGAAGACGCTAAAGAAGTCTGGTGTGGATACCATGTCAAGTATGATGCGCCACCCTGGCCGGAGTCTGGTGGAGCTATACTAAGCCCGGT             | 4 |
| wt-121890-122010 | 5294 | GTCCATGGAGGCCATCTCGTGTACCTCAAAGGTTACCCTGTCACCCCTGGCCCTCCCGCGGCTAAACATTGGGGTCCCAATGAACATGGATGTTGAGGCCCTGGAGCTAAACAATAT       | 4 |
| wt-122010-122130 | 5295 | GTTTTACAGAGAGGATCTCATCGTCTGACACGGTATGCCACCCCTGGTGGATCTTGAGCTTGGCCCTGGGCAATATAGGCCATGGGGGACATCTTGATGTGCATGCGGGCTATCC         | 4 |
| wt-122130-122250 | 5296 | ACTGATTGAAACGAGGGAAAGGACACTTGGCCCGGTATTTGCCATGGGGCAGCGGCTCCTCCGGTACTCTGCAAAAGAGCTGCCTGCGCGGTTGAAGCTTCCACGGCCCGCTG           | 4 |
| wt-122250-122370 | 5297 | CTGAGGATTGGCATAAACAAGGTTGCCAACATCCTGGTGATGGTGGCAGCCACTGCGGGTCCCGGTTAAACATATGGAAAAGGAATGGCGTAAAAGACACTGGGTGACGGCCGGGT        | 4 |
| wt-122370-122490 | 5298 | CCTCTCGGAGAAGGC AAAAGGCCACCAGCCGTTACCAAACAGTCTGCTCTGTCGCTTGTGCGGGGATTGGGGCCAGCTGCTGCGTAACGTATTGTCCACCGACACACGACGGC          | 4 |
| wt-122490-122610 | 5299 | ACGGGTGAAAGTGGGGCAGGTGATGAATGAGGGCTGAGTCCCTGATCATGCCACGGTGGGGCGGAGGTGGAGATCTCCAGCAGATCCCTGAGCGTCCCAATTCTCAAATTGTCCGAG       | 4 |
| wt-122610-122730 | 5300 | GATGTCTCGTCCCCTGGTAAAATGGTGGCTGAAGGCTGGCCGTTGTAGGCCAGGGTCTGGGGCACGTGTAAGTCCACCCCGAGGCCACATGTGGGCATTGGTGCAGGTTGGGAG          | 4 |
| wt-122730-122850 | 5301 | GAAAACGTAGTAAAGATCTTTTCCAGCACATCCGCATGCCCTCATCTACATAAGGGCTAGGTGCAGACGAAAATCGTGGTCTGTGTTCCGTTAACCCGGTAGCCGTACAAGGCCAC        | 4 |
| wt-122850-122970 | 5302 | AAATTGGGCAGCCATCTCATCCATGTTTCCAACCCTCAATAAACTGGGGCGCGGCCAGGGTGCAGCGTAAACCTCATTTCGATAAATAATCTGGGGGGCCCGTCACTAACGGTGAG        | 4 |
| wt-122970-123090 | 5303 | AAGATGGGTGAAAATGTCTGTGTAGGCCACCGGGGGAGCAGGTTAGGGTCCAGGAGAGCGCAGACATACTGACCCACGCTCTCATCCCCACAACATCTGACCCGGCCAGGCGCATCAG      | 4 |
| wt-123090-123210 | 5304 | GGCCTGCTCTAGGGCTATAAGTTCCCATAGATTTTCTATACATGGAATAGGCCCTCTTGAGAGTGGCGTTATTTCCAGGTGGCGGCAGATGAACTTGATCATGAAAAGCTGTTTAC        | 4 |
| wt-123210-123330 | 5305 | AAAGGCAAGCCTCCCTGACCCTCCAGTAGGTGTGATGCACAGGGACACAAAGGCACGTTTATGACAAAATTTTCCTCAAACCCGGATCATAGCCTCGACTACGTAGAAAGAGGC          | 4 |
| wt-123330-123450 | 5306 | TGGATAGGCAGTGCATAGGCAGTATCTGCACAGTCTAATAACGGCCTGATCCACCACGTGGGGCAGAGATGGCGGTCTCAAATGCTGCCCCGGGCCCTCTTGAATGCAGCTGG           | 4 |
| wt-123450-123570 | 5307 | GGCCAGGGAGTCCGCCAGTTACCCACATTAGCCCGTGCACAGCCCTGTCCCTGGCCCTCTCCCGGCATCCCTGCCAATGTAATAATCAATAAGGGGGTGCAGTCCAGCCCGCAGCAG       | 4 |
| wt-123570-123690 | 5308 | GTCATAATTGGACGGTGGAGGAAGTCTTCGGTGGGCAGCCCGACTTGAGAGCTATATCTGTCAAGGGGGTGCATACCTGTTATATAGAACTCGTCCACAATAACAAGCACATTCTAT       | 4 |
| wt-123810-123930 | 5310 | GAGAGCATCTGTAGGTAAACCGGAGGAGAAGTTATTCTGTTTACGATCCATGCCTCCACGGTAGCTGCTGTGTTGGGGTGTCCAGCATTTGATGGCGGGGAGGCTCGTACTT            | 4 |
| wt-123930-124050 | 5311 | GGGATTGGGCATAAAACAGGCCCACTGGGAAAATAGTAGCTGTACTGCATTCTTCTGTTGAGGGGATGGGGACTGAGTGTACATTTGATACATCTTTTGACAGGCTTTCCACGGCCACCGGGT | 4 |
| wt-124170-124290 | 5313 | AGCCATGAAATGCTCAAACGTACGCATACGCGCCCTAGCTCACGGCAGTGACAGGTTCTCCCCCGTACCACAAAAGAAGCATAGCTCGAGGGCCCAATAATCTGGTGTGCAGCCCTC       | 4 |
| wt-124290-124410 | 5314 | CTCACCCAGGAAGGTC AAGAGCTGGCGCAGAAGCTTGTTCGGTGCATAAACAACCCCCCACTGGCTCCTCCCGGTCGTAAGTACTGACCCCTTGAAGCTTACAGCAGCTCTCCCC        | 4 |
| wt-124410-124530 | 5315 | GGACACGGCCGCTACCATCTCAGAGAGAGCGGCTTCGCACGTA CTGAGAAAACCCCGAGCCCATGTTCTCGGCCGGTCCAGGAAGAAGGAGTGTCCAGCAGATGCCTTTGAAACATGGC    | 4 |
| wt-124530-124650 | 5316 | AATGAGGTCTGAGACTTGGAGTCTTGGAGAACCCTCTCAGTGAAGGTGGATCCGCCAGGCTGTGACAGATAAAGCATGGGAGGGGATGGCGAAGCTTCACTCAGGACGGTGTAAAT        | 4 |
| wt-124650-124770 | 5317 | GAGGCCCTCTCCAGGGCATCGACCCCAACTGTAGGGCCGAGGGCACGGCTTTGACAGCCCCACGTA CTCTGCGTA CTGACCGGGGTCTCGGGGATACTATGACAGGATCTCCAGATC     | 4 |
| wt-124770-124890 | 5318 | CAGCATGGACAGTTCATTTCCGTACTAATGTGGTGGTGTGGCAATTTTGTACCACAATGAATGTCCGCTGTGCTGGGTCTCCTTCCGTCCCCTGAGCAATGGTGGGGAGCGGAGAT        | 4 |
| wt-124890-125010 | 5319 | TCGAAATGAACTTGCCTAGCTACGACTCAGTGTCTTGAATTCGGTGTTCACACGACGCGGCTGCGCTCCAGGAAGCGAACAATTGGATGGCGTTCGATGGCTTACAGCCCC             | 4 |
| wt-125010-125130 | 5320 | GAGTAGCACTCAAACCTTGTGCCGCTCCTGGCCTCCTGGCCTTCTGCCACACGAGCTCAAAGCTATGAACAACCCCTCAGCCCGTACTGCGCCAGGTTTCGAGAGCAGTTCGCGATCCAC    | 4 |
| wt-125130-125250 | 5321 | CGTCAGATAGGGGAAGGCTGTTTTCCACACCTCATTTAGGGCCATGACACAAGGTAAGAGGAGATGGGGGAGGTTCTCGAGGGCTTCTTCCACAGCTGGTCTTTTACGCCCT            | 4 |
| wt-125250-125370 | 5322 | GGCCTGCAACCAGCCACCACACTTCCCGAGGATGCTACCTTCTAAATCAATGGTGGACACGGCCCTGGGCAGGGAGGCCACCTTTTACCGGTGTGCGGCTATGCTGGCTCT             | 4 |

|                  |      |                                                                                                                            |   |
|------------------|------|----------------------------------------------------------------------------------------------------------------------------|---|
| wt-125370-125490 | 5323 | ACTCGGGCTTATCGGAATGAATGACTGCCAGGAGCTGCCACCCGGTTTAATAAATCTGAGTCGGGGCACCGTCCCTGGCCCCCTTGGAGTCCAGAGTCTGGAGCATACTGCGAAAT       | 4 |
| wt-125490-125610 | 5324 | ATGGTCCTCTGCCACCCTGACCACGCTGCCACCCTCCCGGTGCCAGGTCATCATATACACCGACTGCCGGGTTCCATAAACACGAGCTCAATGTTTCGCCCTTATCATCCGCTACTT      | 4 |
| wt-125610-125730 | 5325 | GTCTCATACCAATTTGAGCGCTGCTTCGAGCAGTTCTGCCGCGTGGTCCCGCTCGCTTCTAGGGACCTGTAAGCGAAACTCTGCAAAGATGCTGGCTCATCTGAATCAGGTTACCAG      | 4 |
| wt-125730-125850 | 5326 | GATCCCCCCTGTCCGCCCTTCCAGCGGGGGGAGGCCAGACTCAAGTTCACACTTCTTCTCCCTGGAGCACATTCATGCTGTATGCCAAACAATGCCACACTCCGGGAGATCAGGACGAG    | 4 |
| wt-125850-125970 | 5327 | GGCCGCCACCAACCTCACCACCACCACATAGTGGATACTGTACCACGCTCTCCGACAGCCCAATTTGACACGCAGCGGTGCTCTATACCGCTTCGTACCTGTTGCAACTG             | 4 |
| wt-125970-126090 | 5328 | CACCTGCCAAATATCTCCATCCAGCAGTGAAGCCGGGACAGACGGGGGACCTGGAGATCATTTACAGATTAACGGCGGAGGAGGCCCGGAGCTCCAGTTCCCTCCCTCCC             | 4 |
| wt-126090-126210 | 5329 | AACTGGCTCCCTATTGCGATCATAGTTGCTCGCTCCCTGCTCCGGAGTGTCCGTGGGCCACCAAGCTGTCTCCGCTGCGGTCCAGAAGCCAGGGAGGCCAGCGATTCAGGTC           | 4 |
| wt-126210-126330 | 5330 | GGGCCCGGACCCGGCCGGAGACTGGTGGCCCTCTGCGAAGGGAAGATGGGGCACCTAAAGACCCCTCTGGGACCGTTTGGACACCCCGGGGGCCCGGCCGCAAGAGCGAAGA           | 8 |
| wt-126330-126450 | 5331 | CGAGGAGTCTGAGCGTCGAGACGCCCTCCACCCCGCTCGATTCCAGCTTCCAAGCTTCCCGGTTGGTGCCCGTGGGGCTGGGTTTCGCCCTGCTGTTCAACACCAATCGGGTGAT        | 4 |
| wt-126450-126570 | 5332 | CAACACTAAATTTGGTGTGCTCAGAGCCCTGGTGAAGATGCGAGTTTGCATATGCCCCCGCTCATCAACAATTTGTAGCCCGCAAGTACGTGGTGAAGAGACGGCGTTACCCGTCAG      | 4 |
| wt-126570-126690 | 5333 | TCTATTCTTACGACGGGGTGGGGCAACCTAGCCATCAATGTCAATATCAGTGGCACCTATCTGAGCTTCTATTGGCCATGACGCTCACTGCGGTCTTCTGCTGTTGGAGGCTAT         | 4 |
| wt-126690-126810 | 5334 | TTATCCCGCGCCGTGTCAAACCTGGAACCTCGACTAGACTCCGCTCCATGGGCTGAAATCAGAGCCTAGTACAGAGAACCGAAGCGGGTCTTTTGGACTACCAACTTTCCCTCGGTGTG    | 4 |
| wt-126810-126930 | 5335 | GTCTGCCGGGACGGTCTCAACGTGTCTGGTTAAGGCCGCACTGCCACCATATCTCGAGTGCACGGGACAGACTGGAGCAGCACCTGATCCGTGAAATCACCCCATCGTACGCA          | 4 |
| wt-126930-127050 | 5336 | TCGAGAGGCAAAATCTCCCGGATTA AAAACCGGCTCTTACCCTGCTAGAGCTACGCAATCGGAGTCAAGTTCAGTGCACAAGCGTTTCTGGAAGGCTGCTAGACTGCGGCTC          | 4 |
| wt-127050-127170 | 5337 | CCTCTGCGCCTGGATCCAGCTGTATCAACCAGATCGCTCCGAGGGCTGTGTTGATTCTCCAAGAGAAGCATCGCCCACTCAAAAACCGACACGAGTGCAGCTTCTGGTCCACAG         | 4 |
| wt-127170-127290 | 5338 | ACATTCGGCGAACGTGACAAAGCTGGTGGTAAACGAGCGCAAGACCCCGCTGGACATACTGGCCGTAACGCTAACTTTTAAACGAGGTGTAAGCATCAGGTTAATTAAGACAGTCAAC     | 4 |
| wt-127290-127410 | 5339 | TATTTTCCCTGACCCCTCGAGGCACATCCCGGACGCTCGGGCCCTGGCCCGTCTCCGTA AAAACGAGAGATTACCTTCTCCTGGCCCACTGCGCAAAAAGACAGCCCATCCACTG       | 4 |
| wt-127410-127530 | 5340 | CCGTGATGCTCAAGTGAAGCAGCCCGGGCCCGCTTATTACGGGGCCGTGCACCTGCCATCGGACAGATTGCTTCCACACCATCCACAGCCCACTCTTGCCTCGGCGCTGGGAC          | 4 |
| wt-127530-127650 | 5341 | TGCCTGGGAAAATGTACCCATCCCGCCCTTCCGTCGCTCGGGCCTCAACGTCGTGAGAGCCTACCCATGACCAACATGAGGGCACCGATCATCTGCTGGCTCGCTCATCTCGG          | 4 |
| wt-127650-127770 | 5342 | CCCCAACCCCTATATCTAGAGGGACAGCTGACGGTGGGCATGACACAGGACAACGGCATTCCCGTGCCTTTTGGCCAGGCTGTCATTGAGGTA AAAAGCGGGCTGAGTCCACATTA      | 4 |
| wt-127770-127890 | 5343 | AAGCCTCTCGCAACTATGATAGCAGAAGACTCCTGCCTGAATCAGATCGCCCTTTTCCGCATCAGAGCACCCCGCTTCTCCATGGTTGAGTCCGTA AAAAGAGTCCGGTCCGATG       | 4 |
| wt-127890-128010 | 5344 | AGGGAGCAAAACCCGGCGACCATCCGGGATATTCTGGAGATCCCTGAGACTGTCTCCCAAGTCCATCCCAAGTCCATCCCAAGTCCGTA AAAAGGACCCGGAGCCGCTCCACTC        | 4 |
| wt-128010-128130 | 5345 | CGGAGCCCAAGCCACTTTCATGCCACCCCTATGCCCGCATCTTTTACGACATCGGGCGACAGGTGCCAAGTGGGCAATGCCCCCGCGCAGGTGAGCAACGTGCTCATCGCCA           | 8 |
| wt-128130-128250 | 5346 | ACCGTCCCACAACCTCTAAGGCTGGTCCCAATCCGACTTGTGCCTCTCCAGCATTGTACCTCAAGCACGTAGTGTAAAGAGTCTGAATCTGGAGAATATAGTGCAGGACTTTG          | 4 |
| wt-128250-128370 | 5347 | AGGCCATCTCACCTCCCGCTGTATACCATCAGTGAAGGTGAAACCAAGGCCCTTGGAGAGTGGTGGAGCAAGCCAAAACACCCGTAGAGAACATAGTCTTTGCTCAACAGCATCT        | 4 |
| wt-128370-128490 | 5348 | GTTCCACCTCTACACTCCAGATGCTGCTCCCGATGTCAATAACCAAAACATTAGCCTGGCTTAGAGAAGTATTTCTCATGTTCCCTCCCTCAGGCACCATATGAGAAATGTCAGAT       | 4 |
| wt-128490-128610 | 5349 | TCGCCACCCCATCGTCGGCTTGTGCCAAGGGCTGAGCTGGCACCATGGCACAGTTTCTAGGAAAGTACATCAAGGTCAAGAAGGAAACTGGAATGTACAGGCTGTCGAAGCTTT         | 4 |
| wt-128610-128730 | 5350 | ATTACCTGCTGCGCATCTAAAGGAAAACATAACAATCTTGTGAACCAAGAAAGTACCCAGCAAAAAGCAATAAAGTACAGGATTATTGCCAAAACCAACGCTGTCTTTCTTACATA       | 4 |
| wt-128730-128850 | 5351 | GGCCCGCAATTTCCATGACAGTCCCGTGGTGGTGCAGCAGAGATGTAACGCTGGAGGTTGTCAAAATCAAAGTAGTTGGAGCTCAAGATGGAGTTTGGACTTCTGGGAGGTGATGT       | 4 |
| wt-128850-128970 | 5352 | AGGTTGTAGTTCCAGGCCTCCTTTTATCATAACTGAGCAGGGCAAAGCCAAAACATGCAGGATTCTGCGCTCGTGA AAAATCTGGATCTTGGAAATCTGGCGGGCTCCCCAG          | 4 |
| wt-128970-129090 | 5353 | CCACAGCACCCCTGCCAACAATTATTCTATAACGGGGGAGAGAAAGAGAGAGTGTGAGATAGGTGGTGTGGCCCTCGTATAGCCCGGAGCCTCGGACCTCACGGTCACTAGAGATTA      | 4 |
| wt-129090-129210 | 5354 | TGAATGTACATTGATGAGCGGGATAATCATCAGAACTTTGTGAGCCTGTCCACGCAATTTGAGCCGGGAGATGCCACGCATCCCTGTCTCTCGCTCAAAGAGAGCCGCCAAGAA         | 4 |
| wt-129210-129330 | 5355 | ACCCATCCACAGCATTTGAAACGCCCGCTGGTCCAGCCTTGCCTCTGGGGGGCCATGCTCAGCAGCTTGTCTCGTGTAGGTTCAAATCGTAGGCTGAGGTAGCACGGTGAGAAGAGCC     | 4 |
| wt-129330-129450 | 5356 | CGCTCTGTCCCCAGGGCTAGCCCCGCAAAACCTCCCAATCTCTAGGGCCGAGCACAGGGCGGTGGACAGCAGTTGGTATAGGGCAAGGTTGGGCCCTGGGTAGTCAGGTTACAGCC       | 4 |
| wt-129450-129570 | 5357 | GCAACTCGGATGACACCAGTGGCTGCCGATAAACAGGGTCTCTCTCATCAGGATGACAGGGGCTGAAAAGGGGGTGGCGGTTGATAGGCCGAGAGAACACAGATGGGGCCCTCCAA       | 4 |
| wt-129570-129690 | 5358 | TGAGGCCACTGTAACCCCGGCTTGGGGTAGCCGACGGTGGCTAACCTCAGCGCTACTCCTGTTTCTCAGTAGTCAGGTGACCCAGCTCCTCCATCTTGACCTGGCCATCAGCATGG       | 4 |
| wt-129690-129810 | 5359 | CGGCCAAGCGCTCCAGCCGATGATGATGCCCTTGCAGTGGCCCAATAACATATGCCGATGATGCTTTTCCAGGACAGTCACTCAAAAGAGCTTGGCCAACCCAGCGGAGGTCCA         | 4 |
| wt-129810-129930 | 5360 | CGCAGCCATTGCCAGTCTACCCACAGCATGACCCACCTTAAAGAAGGCCACAGAAAACCTCAAACATGGTAGTCAGCGTTTCCGTGTCCAGTTCCGGCTCCGGCAGCCCTCCCTCATCT    | 4 |
| wt-129930-130050 | 5361 | CCAGCAGGACAGTTTCTGGAGAACGTAGCAGCGTAGCTGGCGGCTGTATGGTACGGCTCGGAAAACATATCCTTCAGGTTGGGTACAAAGTAGTTGTGAAAGTTGGCATAATGCA        | 4 |
| wt-130050-130170 | 5362 | CAAAGGTTGTAACAATACCAGGGAATAGTCCCGCTTTGGGCACTGGTTAAGGATGGTAACTAAAAGGCCCCCTCAGATCCCGCAGGTCTTCTGCTTGGCAAAGACCAGGCTCAACA       | 4 |
| wt-130170-130290 | 5363 | CATGCTCATCTCCCTTCTCGGTCACTCGTTGTAGGTGCCCATCAGAAATTTAGAAGTCATGGCCCGGTGTAAGTAACTGTCACGTTGTCACGTTGATGGACAGGGCCACATAAGACAAGTAC | 4 |
| wt-130290-130410 | 5364 | AGCGCAGCTGATAAAAGACATAGCTGTGTGGCCCGTGTGGGACGATGGTGCATATAGTGAAGAGCTGCTTCTCAAGGGGGGACTAAGCATGCAGGCAGGGGAATTCAGGCCG           | 4 |
| wt-130410-130530 | 5365 | TAATGACTCCGGGATGGACCTTAGATCCTACCTATGCATGATCCTTACAGAGACAGCAGGATATCGACAGGCTCGGCCAGCGCAATCCAAGGGTACCAGACGCTTTGTAATAATACT      | 4 |
| wt-130530-130650 | 5366 | TGTAGCGTTAAGCATAGACGCCAAATCTCGGTGACATTTGCCCTCTCTCCACAGCCCTCTGGGCTAAGGCCCTGGGACCTTTGCCATCAGTTCGGTCCATGGGATGGTGAATGCGAAG     | 4 |
| wt-130650-130770 | 5367 | CATGCCCTCTATGTCCAGGTGCAGCTTAACCTCGCTGAGGCTGGCAGCCCACTCCCATAGCAACACCAGGCAAAAACACAGAGCAACTGCATCTAGTCCCGATTTCCCTCTCA          | 4 |
| wt-130770-130890 | 5368 | AAATCAGAGATCACCTTGTCTCAGACCAGCCAAATCGAAAACCTGAGATCGATTGCCGGATTCTCAATGCCTGCATGTAATCTCCGTCCAGCATCCAGGTAATCGTCTGAAACTCT       | 4 |
| wt-130890-131010 | 5369 | GAGAGGTCACAAGCACAAACTGAAGGTAGGCTAGCGTTCCGGGTGAACGCAAGCAAACTCCAACAACACCCCGCTCGGCTCGGAAAGGCTGTATGACTTCTTAAAGTACACTAAAGATG    | 4 |
| wt-131010-131130 | 5370 | CTGTTCTTATACGCTTCTCGGCCACCACTTCAATATGGGCTGTGGCTTTGATGACATCTGCTGATTTGTTGATAGCCGGGCATACCTCACAATGTCTCGGGGCAAAA                | 4 |
| wt-131130-131250 | 5371 | TACTGTGTTAGGACCCAGGCACAGTAAACCGCGTATATGCATCGTTGACACTCTCAGGTAGCAGCATCCAGTCTGACTCATGTTTCTCCCTCGCTTCTCAGGCGCGCATGTTC          | 4 |
| wt-131250-131370 | 5372 | TCCTCACGTTAAACTTTCATCCAGACTATGGTGTCCCCCGGCTGCGGTAACGTTGCCAAAACCTGAATAAAGTCACTATAGGAGAGAAGCTGGCTCCGGAGCAGCATTAGAGGGAAA      | 4 |
| wt-131370-131490 | 5373 | ACCACGGAGGCCGACAGCAAAATGGCGATCATGCAAAATCCAACAATCCAGGGGCGGACTGACCTGGCACCAGACTCGGTAACCCAGCAAGCTCCGCTTCTAGAGGCCAAGACTCTGAAA   | 4 |

|                  |      |                                                                                                                         |   |
|------------------|------|-------------------------------------------------------------------------------------------------------------------------|---|
| wt-131490-131610 | 5374 | GGGGTGGTAAATTTTCATCTGGCATGCTAAAACCTCAGCCGACGTGCTTCCCTTCCATGCCTCGCCGAGTCACATTCTTGTGCATGGCCTTAATGGCATTTCATACATGAGTCCAG    | 4 |
| wt-131610-131730 | 5375 | TACCGCATCGGTCAGGGACTACAATGTCAGGTCGCCAAAGACAGCCTCAAAATGATTAGCATAGTAGTCTTCCACACCAGGGGCACCTTCCAAAAATAGGGAAACAGGCAGGTTTG    | 4 |
| wt-131730-131850 | 5376 | ATTACTGGTACATGATTGTTAGGTGGGCACAAATGGAAACCCGCATGCTCTCCTCTCTGAGCCTTGGCCTGGCGGGTGTCTTGGGCATCATTCCAGATTGAAACATTTCACACTC     | 4 |
| wt-131850-131970 | 5377 | CCACTTAGCCGCTCAGCTGGGCAGCATGCTTGGATAACTTACTAAACTCGGCCATGGGCGGCCAGGTGTTCAAAGACACGAAAGGCTTACCTTGCCACCATTCTTTGTTTTAAAC     | 4 |
| wt-131970-132090 | 5378 | GCGGAATGAGAAGAGGGCCTGCGGAAATAGACTCATCTCAGACTCAGATCAGATTTGTCTCATGAGCCAAAGCCGGCCAGGCCCTCTCAAAGCCTTCTGTACATGAAGCTCCGG      | 4 |
| wt-132090-132210 | 5379 | CTCGTGGAGTCGCGACCTCTCTGTGCACAAATTTTGGGAAACCCAGGAGAGGGGTGTCGGCTCTTGTGGGCCACTCCGGCTACGGGTCTGGGGTAGGGCCAGTAGGCTTT          | 4 |
| wt-132210-132330 | 5380 | TGGTGTGCGGGTCTGGTGGCTGCCCTCCTCCCGGAGGTTAAAGGCGCCATGAGCAACACCGGACACCCGCAAAGCGTACTCGAAAGGCACAGAGGCTAGAGGTCGGCCAGGCCACC    | 8 |
| wt-132330-132450 | 5381 | CTCTCCCCAGACAGTCCGGTCGGAGCCATCAAGGGGGGCGAGTGGTGGGACCTGGTAGAGCCGTCGTATCTTCTCACCTGCCCTGAGTCACTACCCGTTGGGGTAAGAAGTGG       | 4 |
| wt-132450-132570 | 5382 | GGGGCAAATGTCATCAATCTCAGCGTAAAGTTTTCTGTCTTTGTTTTCTAGGGGACTCATCCTCTGACATTTTCGCCAGCCGCCGGGGCGGCCGCTCTTCTCGAAATCCAGCC       | 4 |
| wt-132570-132690 | 5383 | ATGGATCCACCCGGGCTGTGTGCCCTCTCCACACACGACTGGCAAAATTTTACAGTCTTCCCGGCTAGAAAGGCGGAGGTAAAGGAGGCGACCTCGGTTTACTCCAAAGCTG        | 4 |
| wt-132690-132810 | 5384 | CTCTCTTAAAGAGCTGGGAGCACTGGCCCTTTTTGTCTGTCGCCCGGGACCCAGTTCACAGCTTTAGACTATTTTGAAGTCACTCGGTCGGGACGAGTTCAGATTGCGTT          | 4 |
| wt-132810-132930 | 5385 | TGGTGTGCTGACGCCCTTATCCCGGTTTATTTGATGATAAATTAAGGCGCCATGAGCAACACCGGCAACCCGCAAAGCGTACTCGAAAGGCACAGAGGCTAGAGGTCAGGCCAGCC    | 4 |
| wt-132930-133050 | 5386 | TTGTGTGACTGTGCCAATTTTCTTCGACGTCCTGCCCCCGCTGTGGGCGAGTCAGGCCCTGGAAGTCTTGGCGGCTGGTATTTAAAACCAGCGATCCCTGAGAACCCTCCAGGTA     | 4 |
| wt-133050-133170 | 5387 | GAGTTTCCAGCCCTGGGCCAAAGACCCTCCCACCTCCACCACCGGCGTCTGTAACCTCTCTCCGCTGGCAGGATGGCGCTCTCCGGCCAGTCTTGTATAGACCCCGCCGACTGCC     | 8 |
| wt-133170-133290 | 5388 | CAGGGACACAGCCCGAAACTCATGTGGGCCAAAGCCTTCGCAACTCACTGCGCGTGTGCCCGAAAGCGTCGAGCTGACAGAGCGGGAGGCCAAAGGGCCAGGTCGGAGCGTGCCA     | 8 |
| wt-133290-133410 | 5389 | CAGGTGTGCCAGGTGCTCAAAAATAGGCTGCTCCGCGTGGAGCTGGACGGCATCATCGTGACCACCTGGCCAGGGCGGAGGAGATCCGCCAGGACCTGGATGCTGTAGTGCCCTTCTC  | 4 |
| wt-133410-133530 | 5390 | TGATGGCCTGGAGAGCATGCAAGTCAAGTCCGCCCTCCACGGGAGGGGCTCTGCGCCAGCCCGCCCTCCCATCCCCAGCCAGCCGCTCACTCGGTCACCGGAAACGCCAGTAGTC     | 8 |
| wt-133530-133650 | 5391 | AGTCTCAATCTCTCCACGACCCCTCTGATGGTGGCCGCGAGCCCTGGCTCAAACGCTGCTTGGTAACTGTACGGGAACATCAACAGTGGGTACCCTCCTCGAACCTGGTACAG       | 4 |
| wt-133650-133770 | 5392 | GACCATGTGGCTAATGCCATGACGCGGGGCTGTTCCCTAACGAGCTGAGGGGAACCTGAAGTTTACCAACTCCGCTCCCTAAAGCTGATGACAGAAGTGGTGGCGGTGTGAGGG      | 4 |
| wt-133770-133890 | 5393 | CACCACCAGGACTTTTTTCTCAGACGTCAGGCACCTGCCAGACCTCCAGGCTGCCCTGATCCTCTCGTGGCTACCTGCTACTCCAGGGGGCTCCTCACACCAGCAGCGCCCTCC      | 8 |
| wt-133890-134010 | 5394 | TGCCTCACGGGAAGAGCTGCTGGAGCTGGCCCCGAGAGCTAGAGAAATCATCGCCGACCTCAAGGCCAAGTCAACCAGGCGGAAATTTATGATTTTAAACAGGCAAAAGGAAGC      | 4 |
| wt-134010-134130 | 5395 | GGCCAGTCAATAGCCCTCTCAACCGACAGGGCGGATATCCACCGGACATTCGCGGACAATAAAGTTTACAACTGTGGTGGAGCCGGACTAGCCACGACCGCGCTGAA             | 4 |
| wt-134130-134250 | 5396 | CGTGCCGGGGGCGCGGTCTGGGACCCGGACCTGGTGTACCGATCGCAAACAGATCTTTGGGAGGATGTGCCCCCTTCTCATCTACCAAGCTGGAACCTGCGCGTAGGTTAGCCG      | 8 |
| wt-134250-134370 | 5397 | ACTCGAGGCCCTGATGCTGCTACAGCTCTCGAGACCCCAACTGGCCAGGGCGCCACCCGGCTACACCTATCGTCCCTGCTCCCCAGGCAATGCAGCGCGCAAGCCTGC            | 8 |
| wt-134370-134490 | 5398 | CATGGCGTCAGCTGATGATCGCGGCGCCTATCCAGTCCAGACGCTTTTCCGCCAGGGGAGCTTCCCGCTCATCTGGGCCACTACGTCAGGCCACCGGTGGCGGAGACCCCAAGG      | 8 |
| wt-134490-134610 | 5399 | CTCCATCAGCTCTTTTTCCCGGGGCTGGTTTTGCTGGCCTGGAGCTGAAGTTGATGGATGGGCGAGCTCCCTCCATTAGCCATAAACTGACCCGACAAAGTTTGAACCCCTT        | 4 |
| wt-134610-134730 | 5400 | TGAGATTATCAACCAGAAAGCTTTTATTTACAGACCCGGCTGCCATGCTGGCGGGCGACACAGCTGGCTAGCCTCGAGGACGGGCGTGGTGTGCCCTGGGGCCCTCCGCCAT        | 4 |
| wt-134730-134850 | 5401 | GCTTGCGGCGCGGAGATCCTGGAGCCTCAGTTCTACCGCTCGGATGACTACGACCGGGTGTACTTCTGACGCTGGGCTACCTGGCTCCCGGTGGCCCAAGCTGAGCCAGTCTCCTC    | 8 |
| wt-134850-134970 | 5402 | GCACTGGAGTGGGTATTGGCAAAAAGTAATAAACTCATGCGACGGGGTTTTGCTCCTTCTGCTCTTGGTTTGGGTAGGGGAGTAAAGCCGTGCCAGGCCGACCTGCTCAGGGC       | 4 |
| wt-134970-135090 | 5403 | CACGGCGTGCCAGAGGCCCTGTAGTCGTGCGCATCCGAGAGGATGGCAGCGTCCAGAAAGAGATAGCCGGCCAGGCAGAGGAAGGCCAAAGAGGGGGGGAAGCGGTGCCGAACCCG    | 8 |
| wt-135090-135210 | 5404 | GGTTCATGCTCGTCTGACCCAGTGACAAGGAGTAGAGGACACCCACCAGCGGTTAGGGAGGACTGCCAAAGTTGAAGAGCAGATTTCCGTACGCCAGGGTGACTGGCT            | 4 |
| wt-135210-135330 | 5405 | CAGTCCGGCGCCTGCGCAGTCCAAGCTGCCACACACATGCAGACCGCCCTGTGACATCAGGCCGTCATGCAAAAACAGACAAGAGACCGTGAGCGTTACCGGGCCGAG            | 4 |
| wt-135330-135450 | 5406 | GGCCTGCGGGGAAGCCACCAGGCGCCGGTAAAGCAGGTACCAAGTATTACCGGACCTTGGTGCCAACACACAGTATCGTGGTCTTCCAGTATTTATCACGGCTCCCG             | 4 |
| wt-135450-135570 | 5407 | CCACAGGTAAGTAAACCTTAGGGTCAGCAGCTGGTCAGGGATAGTGGCAAAAACCTGAGCTCGCTCGCGCAGAGCGCAAGCGGCCAGTCTTTAGCATCTTCCAGGAGGACCC        | 4 |
| wt-135570-135690 | 5408 | GTGAATCCAGGTGTACTTCCGGCCTCATCCCGGCGACCCCGAGTCCATTAAACATAGCGGGACAATGGTGACGGCACCTGTGTATACGCTCGCGGCTCGTGGAGCGCCCGGAGCG     | 4 |
| wt-135690-135810 | 5409 | CCCACCAAGGAGCCTGCTTCACTGGATCCCTCACCTCAAGAGCCAGCTCCCTGAAAGAAGCCCTGGCACTCAGCGTGGAAACCTGCCGGATGCTCCGTCGGCTCAGTCTT          | 4 |
| wt-135810-135930 | 5410 | TGGCTTTACCAGAGCCGAGCGGGTCTTTAGCGCAGCCTCGATTAACCTGCGGGCTGCTGCTGCTGGACTCAATTTACCACGATTGCGATATTGACAGAGTCCAGCGCTGCC         | 4 |
| wt-135930-136050 | 5411 | CCTCCCTCAGAAACCAAGGTTGAGGCTGTCACGCGCTGGCTCCCTCACTGTCAGTGGCTCCCTCCACCCAGACATACCCCAAACCCAGCAGAGTGGAGGAAGCTGCTCTTTTGA      | 4 |
| wt-136050-136170 | 5412 | CCACGTGCTACTGTGCCCTGGTGTGGTGGGTCGCGCGCGCACCCAGCGAGTACGGTACAGACCTTGCCTGGGTCCTGAAGCACTTTAGTACCTGGAACCGTCTATCGCCGCCAGATTGA | 4 |
| wt-136170-136290 | 5413 | GAATGACGCCAATGCCGAAAAGCGTGAATCCGGATGCCGGAAGACCACCCTGCGCCCTCAGAAAGCTCATAGTAAAGCAATCGATGCTGGATTTGAGAAAACGGTGGAGACTCT      | 4 |
| wt-136290-136410 | 5414 | GAGGACAGGAGGGGTGTGGCCAATATCCAGCGGAGTCGATTTAAAGGCCAGCAGCGCCGGAGCTCAAAAAGCGGCAAGGCACTTACAGGCCACCACCGGCTCCACAGACCC         | 4 |
| wt-136410-136530 | 5415 | AGCCACCATGCTATCAGGTAACGCAGGAGAAAGGAGCAACAGCCTGCGGAGTTTGGCCGGCGCGGGCCAGGACCTCATCAGCGTCCCCGCAACACTTTATGACACTGTCCAGACCA    | 4 |
| wt-136530-136650 | 5416 | CCTGGACAACAACCGCCGAGGACACCCCGTACCTACCGCGCCCGCTGCCCCCTTTCCACAGCAATAGCCACCAGCGCCTTCTACGGTCTGGGGCGGAGCGGTCCGCCC            | 8 |
| wt-136650-136770 | 5417 | GGCCGGCGGCTACTTTACCTCCACAGGAGTACTACCGGGGCCCGGGCCAGCCGGTGGCTTTGGCGATGGACGCTCACACCTACCACCCCAACCCACACCCCTCCGCG             | 8 |
| wt-136770-136890 | 5418 | CTACTTGGCTTGCAGGGCCTTTGGCCCCCTCCACCCGTGCTCCTACTACGGATCCCACTTGGCGGAGACTACGTCGCCGCTCCCTCGCATCAACAAGCGAAAAGAGACCC          | 4 |
| wt-136890-137010 | 5419 | CGAGGAGGATGAAGAAGCGGGGGCTATTCCCGGGGAGGACGCCACCCCTACTACGCAAGGACATAGCGGGCTCCTCAAGAGTGATGAATGAGTTACAGCACACGCTACAGCCCTGCC   | 4 |
| wt-137010-137130 | 5420 | CCGGGAGACGCTGCTACGGCCACCCGAGTCCGATACCTGCCCGAGGCGCCCTGTACACCACCTCGGGGCTTACGGATTTAGCCTCATCAAGCTACGAGTTGCCAGATA            | 4 |
| wt-137130-137250 | 5421 | CGTCCCTATCCGCCCCACCAACTCTCACAGGACCTCAGCGCAGCTCAGCCCGGCGCACACAGCCCGCCGAGGCGCCACGCTGTGGCGGATCCAGCATCCCTGAGCGGG            | 8 |
| wt-137250-137370 | 5422 | AGCAGCCGGAACTCTGGACCCCGGAGGACCAACCCCTACCCAGCAGCCACCCAGCGGGCCACCAGCCGAAAGAACTGTGACAGCCTCGGTCGGGAGTGCGTCAAGGA             | 8 |
| wt-137370-137490 | 5423 | GCCACACCCCAAGGCAAGTCTGTGTCAGCCCACTCAAGTCCATTTTTGCGAGGAATTGCTGAATAAACCGGTGGCTTAAAGTAACTTTATTGCGTGTAGTACCTGTCCATT         | 4 |
| wt-137490-137610 | 5424 | CACAGGGGTATCCAGCCTTGGCCGCTCCCCAGGCCGCCAGCCACCAGCAGGAGATGATAATGATGAGGAGCACCGGACCCACAGCACAAAGTATTAGGAGCAGGGCCAG           | 4 |

|                  |      |                                                                                                                          |    |
|------------------|------|--------------------------------------------------------------------------------------------------------------------------|----|
| wt-137610-137730 | 5425 | TGCACCCAGTGGTCTTAGGGGCCAGGGATCGATTGAAAAAGGGCCAGGGTCACTGGCTTATGCGTGGGACGTTTGAAGAACAGGCCCGCTATGGGGCCTGTACTGGTCTTGGTGTG     | 4  |
| wt-137730-137850 | 5426 | TGGGAGACTAATGTGGTGGGGCTATGGTAGTGGCTGGGATAACAGTAAGATGCATACGCTGAGTGAGGGTCCGGTTGGCATGGTATTGGTCGCTTCTTCCCTGCAGAGTAATTGCAG    | 4  |
| wt-137850-137970 | 5427 | TGGACCCCGGAGGCCACACTGCAATTTCTCAGTGCACATTGCACGTAGTAACTGCATCGCAAGGGTACATTGGGGATTATCAGAGAGACGGAGGTGGTGGAGTCATTTACCCAT       | 4  |
| wt-137970-138090 | 5428 | TCTAGGGTAAGGCTATAATTGTAACCCCGTGTAGTTATATAGTTCCTGTTGGAAAGTAGCTACGGCCAGGGGAGTTGCCATCCCCCGGGAGTGTATCCCCGGCCAACTCGATCCGA     | 4  |
| wt-138090-138210 | 5429 | GAGACCGACTCATTGCTAGGAACGCTGCAGGTGAGATTCACTCTAGCACCTGCATGGGCGGTGACATTTCAAATTAACAGATCTGAGAAAAATGCACAAACAGACCCACACAGCAG     | 4  |
| wt-138210-138330 | 5430 | CACAATAGAAGCAATAAGTCAATTCCTAACTCAGTTTAAACTCCCTGCTTCAGGCCATAATGTGGTGGGTGTGCTTTAGGATCACTTTTATATTTGCAACAACAGCC              | 4  |
| wt-138330-138450 | 5431 | ATACCCGGAAGAGGAGCTGCCCATTGTCATTTTTCAAGCTGCTAAGCCAGCACTGGGAGTGGCCAGTCCCTCAGCAACATGGAGACCTCGAAGGGAACTGGCAGGAGCAGGGA        | 4  |
| wt-138450-138570 | 5432 | GTCACGTAGGCACTAGCCTCTTCATGTGAGGTAAAGATCGCTAAAAATGGGATCAGGGTATGTAACCCAGTTTTTCGGGGGATGGTGGCCAGACACGGCGGGTGGGGGAAGGAGCTG    | 4  |
| wt-138570-138690 | 5433 | ACACGATTGAGTAGAAAGGGCCAAAAATACACAGCTATAAGGAATTGCTCAGGCCAAAGTTGTTCTCAGGTGGCTTAGGCCAATGTAGGCAATTGCGTGCCTAGAACATTGCTAAT     | 4  |
| wt-138690-138810 | 5434 | GTGCCCTGGGTTTCTGCCTCATGCAAAATATTCTACCTCCCCGGCTGGTGCAAAATGTCTGCCTCAGAATACTAACAGTAATCCAAGTAAACATTCTATCAGTAAACGGGCAGAAA     | 4  |
| wt-138810-138930 | 5435 | ACTGATAAGGACCGGAGTTGGCCCTCCGCGTGTCCGGTGGCTCACACGTCCCTCCCCCGGGCCGATGGCTGAGGCCGGAATATGCAAGTGCATTTTAAACAGTAGGGG             | 4  |
| wt-138930-139050 | 5436 | CCTCCACCTAGGTGCTTTGTTAATCTTTAGTGGGAACTAGTGGGAGTGCCTGCGCTGCGGACCCCTAAGCCATGCTTGAATGCTACCGGAGCTCCTTGTGTAATCCCTGTAAACACACA  | 4  |
| wt-139050-139170 | 5437 | CCACCTAAGAACAAGGCATTGTTAACCTTTGGTGAACCTAGTGTAGTGTGCTGTAATAAGTGTCCAGCCAGCCACTAGTACCAGGTGTACCAGGAGGCTACTGCTCAGTGC          | 4  |
| wt-139170-139290 | 5438 | CACITTTACCTTCTCAAATCTATACGGGGGGGGGGGGGCTCTGTAACATTTGGTGGGACCTGATGCTGCTGGTGTGCTGTAATAAGTGCCTAGCACATCAGTAGCCACAGGTGCA      | 4  |
| wt-139290-139410 | 5439 | CCAGGGCTACTTGCCTCGGCATCTCCTCACCAGGAGAAGGGGTTAAACAACCCGTGGGGGGTCTTAGTGGAAAGTGACGTGCTGTAATACAGTCCATAGCACCGCTATCCACTATGTCTC | 4  |
| wt-139410-139530 | 5440 | GCCGGGCTATATGTCGCTTACCTCCCTATATAGTACGACCCACCGAACCAGGCATGATGAGAATAAAATTTATGCATCATCTTAACTGTGCCGTTGGAGGGAACATGA             | 4  |
| wt-139530-139650 | 5441 | CCACCTGAAGTCTGTTAACCAAGTCAAGTGGTTTTGTTTCTTATAGAGACACAAGGACTGCCAGCCCATGGGAGGGGGGTGGGTACGGGAGAGTTTGGCTGTTTTAAACAAAGT       | 4  |
| wt-139650-139770 | 5442 | CTCATCTGATGCTGTGGCACCTCAAGGTGAATATAGTCCCATCGAGTATCGTGGAAACCGGTGGGCGCTGTTACCTAAAGTACGCAAGGTCTGTAGCCGCCAGGGTCCGT           | 4  |
| wt-139770-139890 | 5443 | TTACCAGGCTTTCAGGTGTGGAATTTAGATAGAGTGGGTGTGCTCTGTTAATTACCAAGATCACCCCTCTATCCATATCCACAATTGATAAACTCCGCATGTCCAACAC            | 4  |
| wt-139890-140010 | 5444 | CACGTTGAACAGGATGTGGCACCTAAGAGGACGAGGCATACAAGGTTATTACCAAGTCCCTGTATGCTGCTGGTGTCCCTTAGTGGGACGACGGCCTAGGTAGCATCATTACACTAAA   | 4  |
| wt-140010-140130 | 5445 | AGCAGTGACCTTGTGGTACTTTAAGGTTGGTCCAATCCATAGGCTTTTTTGTGAAACCCGGGGATCGGACTAGCCTTAGAGTAACCTCAAGGCCAAGCATTTACACCTGCAAAATGCA   | 4  |
| wt-140130-140250 | 5446 | CCATGTAAACACAGATCAAACGAAAGTTGCAGCTTTAGATGGCAAGAACTGGGTTACGGCATAGAAGCCTGCCTACTATAGCACCCCAATGTTTGGTCCAGGGTGGGGAAAG         | 4  |
| wt-140250-140370 | 5447 | GCACGTGCCCTTAGAAAACCTTAGCTGCAAAAATTTCTATTGTGTTGGGAGAGCCTCTATATCTAAAGGCCTTCTCACAATACAAATGTTACTAACGCTGCCCCTGTGGAGACCTGCTAT | 4  |
| wt-140370-140490 | 5448 | GTGGCTAGACGTATGGCCTACCCAGACGTTGGGGTCTCGGTTAGGCCATGATTTCCAGGCATAGGTTACAACAGTCACTGCTATCAAGCCTACTCAGTCCCAACGACACATA         | 4  |
| wt-140490-140610 | 5449 | CCCCCGCTCTCCTGCCATGAGGACTATGGCAGTGTACTGTTCTGCTTTACTCTTGACCAGGCTGTCATTCTATCAGAATAACAGGGGAAGCAAGGCCCCCTGCTTCAGCGGGA        | 4  |
| wt-140610-140730 | 5450 | CACGTGTTCTAGAATCTCGGAGCAATAACTACCTGCCCTCTAATCTGTATGCTGCATGAAAAACCCATACACAGTGTGTAAGTTTAGCCAGTTATTGTTACACCAATGCCCCGAA      | 4  |
| wt-140730-140850 | 5451 | AGTCTCCCCTGTCCTTTGGTCTCAGGACCCAGCCCTGGAGCTCGGGGGCGCCGGTGGCCACCGGGTCCGCTGGTCCGCTCCGCGCTCCGCGCTCCGCGGGGGTGGCCGGTGCAGCC     | 12 |
| wt-140850-140970 | 5452 | GGGTCCGGGTTCCGGCCCTGGAAGCTCGGGGGCGCCGGTGGCCACCGGGTCCGCTGGTCCGCTGCCCGCTCCGCGGGGGGTGGCCGGTGCAGCCGGGTTCCGGGTTCCGGCC         | 12 |
| wt-140970-141090 | 5453 | CTGGAGCTCGGGGGCGCCGGTGGCCACCGGGTCCGCTGGTCCGCTGCCCGCTCCGCGGGGGGTGGCCGGTGCAGCCGGTCCGGGTTCCGGCTCGAGCTCGGGGGCGCG             | 12 |
| wt-141090-141210 | 5454 | CCGGGTGGCCACCGGGTCCGCTGGTCCGCTGCCCGCTCCGCGGGGGGTGGCCGGTGCAGCCGGTCCGGGTTCCGGCCCTGGAGCTCGGGGGCGCGCGGGTGGCCACCGGGT          | 12 |
| wt-141210-141330 | 5455 | CCGCTGGGTCCGCTGCCCGCTCCGCGGGGGGTGGCCGGTGCAGCCGGTCCGGGTTCCGGCCCTGGAGCTCGGGGGCGCCGGTGGCCACCGGGTCCGCTGGTCCGCTGCC            | 12 |
| wt-141330-141450 | 5456 | CGTCCGGGGGGGTGGCCGGTGCAGCCGGTCCGGGTTCCGGCTGGAGCTCGGGGGCGCCGGTGGCCACCGGGTCCGCTGGTCCGCTGCCCGCTCCGCGGGGGTGG                 | 12 |
| wt-141450-141570 | 5457 | CCGGCTGCAGCCGGGTTCCGGGTTCCGGCCCTGGAGCTCGGGGGCGCCGGTGGCCACCGGGTCCGCTGGTCCGCTGCCCGCTCCGCGGGGGGTGGCCGGTGCAGCCGGTCC          | 12 |
| wt-141570-141690 | 5458 | GGGGTCCGGCCCTGGAGCTCGGGGGCGCCGGTGGCCACCGGGTCCGCTGGTCCGCTGCCCGCTCCGCGGGGGGTGGCCGGTGCAGCCGGTCCGGGTTCCGGCCCTGGAG            | 12 |
| wt-141690-141810 | 5459 | CTCGGGGGCGCCGGTGGCCACCGGGTCCGCTGGTCCGCTGCCCGCTCCGCGGGGGGTGGCCGGTGCAGCCGGTCCGGGTTCCGGCCCTGGAGCTCGGGGGCGCCGGT              | 12 |
| wt-141810-141930 | 5460 | GGCCACCGGGTCCGCTGGTCCGCTGCCCGCTCCGGCGGGGGTGGCCGGTGCAGCCGGTCCGGGTTCCGGCCCTGGAGCTCGGGGGCGCCGGTGGCCACCGGGTCCGCTG            | 12 |
| wt-141930-142050 | 5461 | GGTCCGCTGCCCGCTCCGGCGGGGGTGGCCGGTGCAGCCGGTCCGGGTTCCGGCCCTGGAGCTCGGGGGCGCCGGTGGCCACCGGGTCCGCTGGTCCGCTGCCCGCTCC            | 12 |
| wt-142050-142170 | 5462 | GGCGGGGGTGGCCGGTGCAGCCGGTCCGGGTTCCGGCCCTGGAGCTCGGGGGCGCCGGTGGCCACCGGGTCCGCTGGTCCGCTGCCCGCTCCGCGGGGGGTGGCCGGT             | 12 |
| wt-142170-142290 | 5463 | GCAGCCGGTCCGGGTTCCGGCCCTGGAGCTCGGGGGCGCCGGTGGCCACCGGGTCCGCTGGTCCGCTGCCCGCTCCGCGGGGGGTGGCCGGTGCAGCCGGTCCGGGTT             | 12 |
| wt-142290-142410 | 5464 | CCGGCCCTGGAGCTCGGGGGCGCCGGTGGCCACCGGGTCCGCTGGTCCGCTGCCCGCTCCGCGGGGGGTGGCCGGTGCAGCCGGTCCGGGTTCCGGCCCTGGAGCTCGGG           | 12 |
| wt-142410-142530 | 5465 | GGCGCGCGGGTGGCCACCGGGTCCGCTGGTCCGCTGCCCGCTCCGGCGGGGGTGGCCGGTGCAGCCGGTCCGGGTTCCGGCCCTGGAGCTCGGGGGCGCCGGTGGCCCA            | 12 |
| wt-142530-142650 | 5466 | CCGGGTTCCGCTGGGTTCCGCTGCCCGCTCCGGCGGGGGTGGCCGGTGCAGCCGGTCCGGGTTCCGGCCCTGGAGCTCGGGGGCGCCGGTGGCCACCGGGTCCGCTGGTCCG         | 12 |
| wt-142650-142770 | 5467 | CTGCCCGCTCCGGCGGGGGTGGCCGGTGCAGCCGGTCCGGGTTCCGGCCCTGGAGCTCGGGGGCGCCGGTGGCCACCGGGTCCGCTGGTCCGCTGCCCGCTCCGGCGGG            | 12 |
| wt-142770-142890 | 5468 | GGGTGGCCGGTGCAGCCGGTCCGGGTTCCGGCCCTGGAGCTCGGGGGCGCCGGTGGCCACCGGGTCCGCTGGTCCGCTGCCCGCTCCGGCGGGGGTGGCCGGTGCAGCC            | 12 |
| wt-142890-143010 | 5469 | GGTCCGGGTTCCGGCCCTGGAGCTCGGGGGCGCCGGTGGCCACCGGGTCCGCTGGTCCGCTGCCCGCTCCGGCGGGGGTGGCCGGTGCAGCCGGTCCGGGTTCCGGCC             | 12 |
| wt-143010-143130 | 5470 | CTGGAGCTCGGGGGCGCCGGTGGCCACCGGGTCCGCTGGTCCGCTGCCCGCTCCGGCGGGGGTGGCCGGTGCAGCCGGTCCGGGTTCCGGCCCTGGAGCTCGGGGGCGG            | 12 |
| wt-143130-143250 | 5471 | CCGGGTTGGCCACCGGGTCCGCTGGTCCGCTGCCCGCTCCGGCGGGGGTGGCCGGTGCAGCCGGTCCGGGTTCCGGCCCTGGAGCTCGGGGGCGCCGGTGGCCACCGGGT           | 12 |
| wt-143250-143370 | 5472 | CCGCTGGTCCGCTGCCCGCTCCGGCGGGATGGGGTGCCTCCAGCCGACACTGGTCCAGCAGCAGGACCCCGCCAGCCCTCATGGGGGGGAGGCGCCGCGCAAGACGC              | 12 |
| wt-143370-143490 | 5473 | CGGGCGGCTGGGAGGTGTGACCCCGAGCCTGCAGCAGCCTGGCAGCCGGCCAGCTGCCTTTTTATCCTTTTTGGGGTCTGTGCAATACCTAAGGTTTGTCTCAGG                | 4  |
| wt-143490-143610 | 5474 | AGTGGGGGGTCTCATTTGTTAATTCAGGTGTGTGATTTAGCCCTGGGTTACATTAAGGTGTGAACAGGTGGTGGTACCTGGAGGTCACTATTGGGATAACGAGAGGAGGA           | 4  |
| wt-143610-143730 | 5475 | GGGGCTAGAGGCCCGCGAGATTTGGGTAGGGCGAGCCTCAGGAGGGTCCCCTCCATAGGGTTGAACAGGAGGGGGAGGATCGGGCTCCGCCCGATATACCTAGTGGTGGAGCCTAG     | 8  |

|                  |      |                                                                                                                         |   |
|------------------|------|-------------------------------------------------------------------------------------------------------------------------|---|
| wt-143730-143850 | 5476 | AGGTAGGTATCCATAGGGTTCCATTATCCTGGAGGTATCCTAAGCTCCGCCCTATATACCAGGTGGTGGAGCTAGGTAGGATTACAGTAGTTCCACTGGGGTACCCCTACCTA       | 4 |
| wt-143850-143970 | 5477 | CCTTAAGTGCGCCACCCTTCCCTCCGTTTTAATGGTAGAATAACCTATAGGTTAATAACCTAGTGGTGAATAGGGTATTGCAGCTGGGTATATACCTATAGGTATATAGAACCCTA    | 4 |
| wt-143970-144090 | 5478 | GAGGAAGGAACCCCTATAGTGAATCCCTCCCCCCCCCTACCCCCCTCCCTACGGTTCCTGAGCCCATCCCCACCCAGCACCCCGGGTGGAGTGCACCCCGCTGCCCTACTG         | 8 |
| wt-144090-144210 | 5479 | ACTTGTCACCTTTGCACATTTGGTACAGTGACCGATGCTCGCCACTTCCTGGGTGCATGACCTGGCCTGTGCCCTGTCCCATGACAAATGTCCCTCAGCGTGTGGCTGCCCTTGGGATG | 4 |
| wt-144210-144330 | 5480 | CATCACTTTGAGCCACTAAGCCCCCGTTGCTCGCCTTGCCTGCCATCACCATGACACTAAGCCCCGTCTAATCCATGAGCCCCGCTTTAGGAAGACCCACGTCCCGGGGACGGAAGCT  | 4 |
| wt-144330-144450 | 5481 | GGATTTGGCCAGTCTCAATTTGGGGAGTGGTTTGTGTGAGCCGGAAGTTGGCAATGGGTGAGGGTGGCCTGGTTAAGCTGACGACCTCCAAGTCTCTACCCTGGGTACACA         | 4 |
| wt-144450-144570 | 5482 | GGTGGGGCGGCAGCCTCAACTTTGGCTGTGCTATTTCTCCCTTTCTAGCCAGGCCATGTGTCTACTTGCCTCTGCTGGTGGGATGCTGTGCCCTGGGCCA                    | 4 |
| wt-144570-144690 | 5483 | ACCCCGCCTTGGGAGCCTGTAGGGGCCAACCCCTGGTTTGTGTGTTCTGTTGCTGGCAACTTACTGGCAGCCAGCAGATTCTAATGGCGCCCGCTTCTTCTCTTGT              | 4 |
| wt-144690-144810 | 5484 | TTATTAATAGAATCTCAGCCAGGACCTATACCTGAGACTCAAAGTCTGGTCTGGTCTGAGACCCCAAGATTGTGCATGCACACTGCACACTGTTGGTATTGGGTTCTATTCT        | 4 |
| wt-144810-144930 | 5485 | TGAGTGTGAAAGTTTGTAAAAAATTCATAAAATGTCACTAATCTCTTACCTTTAGGGTATTGTGCAATCTCAGCTGCCTATTTCAATTTGCCTAAGGTGGCAATTTAAGAT         | 4 |
| wt-144930-145050 | 5486 | GTGGTTAATTAACCATTTCTGTCTGACACCCTGCATGGCAACCGGGTCCATGGCACAATTTAGAGATAAACATAGATGCTTGTCTGTCTCATGTGCAGAGGAGGGGTGTGGTG       | 4 |
| wt-145050-145170 | 5487 | TGCAATATAGTTTCGGATTCCAATTTGGCTGTGCTGCTTTTCACTATGAAATTAATTAAGTACTGACATAAGCAGTGGCAGCCGCGCTATATGTTGGGATGCTGTGGCTTGCATT     | 4 |
| wt-145170-145290 | 5488 | TCCTCTTAGAAGGTAATCCCCCTCTTAACTCCCTTTAAATTTGTATGCAAGCCCTGGTATTATAGAATGATTATCTAGTGTGATAGTCTGAAGGCTGGGCAGAGAATGTTGTA       | 4 |
| wt-145290-145410 | 5489 | ATTTTTATTACCTTCTTACCCCCAGGATATCCAGTTCTAGAAGATCTCTGATATCCCGGGTGCCTAATTCCTTGAAGTATTAGTCTTCTTAACTTAAGCAAGAGCTCCA           | 4 |
| wt-145410-145530 | 5490 | GGATGTTAGCTTTTTTGGTGGGGCTGGTGTGCAGGAAGAGTTCAGTGTGTGCCTTATTTTTAGATGTTAGCTTTGTGTAGGTTAGTATGGGCTGGGTATTCACTAGGAAGGCAAC     | 4 |
| wt-145530-145650 | 5491 | TAACACAGTTAGACGTGCTAGTTGTGCCACTGGTGTATCCGGTCCCAATGTCCACACAGAACACAGGGGGCTGGATTGGCAGCAGCATTGTGCTTTTGTGATTTTTACCGTG        | 4 |
| wt-145650-145770 | 5492 | TATCAGAGTGGGGATGCTAGCCAATTTAGCTTCCCTCCCTTAAACAGGGGGTCTCGCGGGTGCCTTGTGCCTTCCCTCCCGCTTCCCTTGAACCTATAGCATGATAGGTT          | 4 |
| wt-145770-145890 | 5493 | AGGTACCTAACGTGGAAGCCTGGTGGGTGATCCTTCTCGTAGGGAGCGCTTAGGGCTTTGAGCTCAACAGCCCCACCTGGTAAAATGATGTTCTAAAGATTACCCAATTATAA       | 4 |
| wt-145890-146010 | 5494 | CAAAAGCTTTGAGGTAACGAAGACCTGATGGAAGTGGTATTGTGCCGTTGAAAGACGGGTGCTCTGGCTCAAGTTCGCCTTCTATACAGTGTAAAGCCTTGTATCGGAAGTTTG      | 4 |
| wt-146010-146130 | 5495 | GGCTTCGTCCAGTACTCGATAATGTGCACTGCTCGCAAGGTTTGAGCCGCTTCCAGTAGGTTGGGGTCCCAATCAGCAGGTTAGGCAGGTGCACCTTGGCTTTTAGGAGGG         | 4 |
| wt-146130-146250 | 5496 | ACCCTTAAGCCAGACAATGATGCCCCCTTTTTTGCAAATTTGGCTTATTATTAATTTCTTGTAACTAATTTCTGTCTATGACCTGTGTTTTAGATGCCGTTGACAGTGTCA         | 4 |
| wt-146250-146370 | 5497 | CTGAGCTGAATTTGGACGCAGTACTGCTTGGCCCGTGCCTCAGCGCTGATAGGCTGCTGCCCTTGTGTACAGGTTGGCCAAAGCTCCAGAAATATCAATTTGGTGGGGCC          | 4 |
| wt-146370-146490 | 5498 | TTGGTGGCGTCAATAAGCAGTAGGTTTGGAGTACCTACTTTGACCATGTGGATCCAGTGTCTGATCCTGGACCTTACTATGAAACAATTTAAAAAATGCATCATAGTCCAGTGT      | 4 |
| wt-146490-146610 | 5499 | CCAGGGACAGTGCACCTCGAAGTCTCATCATCTCCGTTGTGTGTTAGTGTGGCCAGTACGGCCACCCCTGTGCCACGCCCTGGCATGCTGCTGACATCTGCCGCCAATTCAGCGGG    | 4 |
| wt-146610-146730 | 5500 | CCCTTTCCCGCTTGTTCACCCATAGCAAGAAGGGTAGGTACATGGGTTATTTCCATCAGCACCTGACTGGCCGTTGCAATTAGAGGAGAGGGCAACAACGCAAGGCTGTTGTTTTA    | 4 |
| wt-146730-146850 | 5501 | TTTGGGTTACAAGAGCTGCGCGGTCGATGGGTTCACTGATTACGGTTCCTAGATTGTACAGATGAACAGTGCACAATCTATGGGTCGTAGACAGTGTGCTTACCAAGCTTCC        | 4 |
| wt-146850-146970 | 5502 | ATGGAAGATGTAATTTGCTGCTAGCTATATGGTGGTGTCTATGGGCTCCCTAGGACTCATGTAGTGGGCTTTGTATAGCTAATGAATGTGGCAGCTGTTGTTGACTGGACCTG       | 4 |
| wt-146970-147090 | 5503 | AATTGGAAACAGTAACTGGATTCTGTAACACTTATGGGTCCAGTGTAGTGCAACTATGCTGAATATCTTGAATATGGGAGGAGGGGGCTTTGGGTTCCATTGTGTGCCCTTTCCTGGC  | 4 |
| wt-147090-147210 | 5504 | CAACGTGAGGGTCTAGTGTATAGGGCGTGGCAGTTTTCTGAGGGCTAATAACCCGGGTGAGGCGGTTGTACAGGTTGACTAGACCTGGAGTTGAACAGTACCCTCGGTTACAAAG     | 4 |
| wt-147210-147330 | 5505 | TCATGGTCTAGTAGTTGTGACCCTGCAAAAGTACGTGGGGATGAGCAGCCAGGACTTTGGTTGGCAAGCAGACAGCGCGCATTTGAAACCCAGAGGAGTGTCCCGGGCCACTCTT     | 4 |
| wt-147330-147450 | 5506 | TGGTCTGTACATATTTGTTATTGTACATAACCATGGAGTTGGCTGTGGTGCACCTCATCTGGTAAGGGGGCTGGTGGCAGCCCTGTGTTTAGTCTATGCCAATGTTTACCTGCCCTG   | 4 |
| wt-147450-147570 | 5507 | GGTACTATTTCAACGACCACTTTGAGGACACTGGACCCCTGATCATTCTCGGCTTTACTGCCACTGGCTTCTGTTGGTCAGACAGTTGGTGGCTAGTGTGTGCTTAGC            | 4 |
| wt-147570-147690 | 5508 | AGCAACGCACACAGGCTGACTGCCTTAGCAGTGTGCCCCTTATTTGGCATCTTAAGGAGGATTCTGGAGTGCCTTTCGCGTGAAGCATGCCCTGAGACGTACTCGAGTTAGGACTT    | 4 |
| wt-147690-147810 | 5509 | AATCGCTCCTGTGCCGCTGGATGAGGGAGCGCCAAATTTGTACATCCTAGCTCTGGCCATAGAGTTAGCCACCCCTTGTGCTCCCTTTGGCCTTTCGGGTGCCAATTTCCGGTGGTTCC | 4 |
| wt-147810-147930 | 5510 | CTTTCCGCCCGTTATCCAAATAGCATGTAAAGAGAGTGGCTTAGATTTGGCAACTTTGAGGGAAGCTTCGGTGTAGCTGGTACCAACCCGCCCATACCACGGACAGATTCTGA       | 4 |
| wt-147930-148050 | 5511 | ACTTGTCTGTGGTGTGGTGTGGTTTTGGGGTACGAGGAGTACGTTGGAATGCTTTGGAGCCGAGAGGGATGGGCCGCTTGTGCCCTTAGTGTACACGGTGGCAATAACCCGCC       | 4 |
| wt-148050-148170 | 5512 | CGGTGGCGCTGCCCGTGACCCCTGGCCCTTACCTTCTGGCCATCGGGGACCCCTGGTGTAGGGTCCCTGTTGTTGCTTTCTGCCATAGGGGGAAAGCATGCCTTCAGAATGGCT      | 4 |
| wt-148170-148290 | 5513 | GCTCCGTTGGAAACATTTGAGGCCTACTGTATCCGTGTCTGACAACATTTCCCGCAACATGACATGGGTTAATTAACATGTTTTGTTGCTGGGAATGCTTAGGGCCCTGGAAGC      | 4 |
| wt-148290-148410 | 5514 | TTGTCATTGGATTGATGTTCTGAACACAGGCGTAGGGCTTATTGTAGCAGGATGCTCTCATTCTGCGTACCAGTGGCATGAAGGCACAGCCTGTTACCAATGGCACCTTTTTT       | 4 |
| wt-148410-148530 | 5515 | CCATGTAACCTCCGTGATCCTGGTCCCTTGGAGACTCAAGTGTGAATTTGTTTGGTGTTCGGCGCCAGGGTATCTCGACGTTGGAATGTAACCTCAACTTGGGCACCTCGATAACCG   | 4 |
| wt-148530-148650 | 5516 | GCTCGTGGCTCGTACAGACGATTGTTGGCTGTGTAACCTGCCAGGAACGCTGACGATGTTTGTAGTCTGCCACTTGATCCGGCGCTTTGGTACTCGGGAGACTAATGGGGGGTGTG    | 4 |
| wt-148650-148770 | 5517 | GTATGGCAGAGGCTGGGGTGAAGTGTGGGATGTCCTGGGCGTGTGTCAGCCCATTCGCCCTCTGGGATGAGATGTTCAAGGGTGGCCGTTACCTACCTGCCGATTACATAATA       | 4 |
| wt-148770-148890 | 5518 | TAAATGTAAATGCTGCAGTAGTAGGACTGTGACGGCGGACCTGACTACTTTCGGAACCGCAACCCAGGAGCGTCCGCTCGGCCCATCTCCCGCATGCCAGTCTCGCCCTC          | 4 |
| wt-148890-149010 | 5519 | CCAGGCCTCCCTGGTGAAGCCTTCCGCTCCCGCATTCCTGCTTTCGGCGCCCTGCGGATCCCGATGACAGCAGGCTTTCCCTCCCGCTTAATGAAAAGAATGACAGTGAAGTGT      | 4 |
| wt-149010-149130 | 5520 | GACAGAAGGACAGCTTATTAGTTTACAGAGTGCCTCGGAGGCTACGATATCCCGTTAAATGCTTGTGATTCTCTCAAAGGTGGGGAGGAGAGCTCCACAACAATGTTCCC          | 4 |
| wt-149130-149250 | 5521 | TGGCAGCGTGAGCGCGCAGCCCTGCCGTTGGATGATCTTCTCATGATGGTGTGATAGAGGGGTCTCCGGCTAGATGAAAGGCCTGGGCCATGCTCTGGCCGGTACAGATCGTTAT     | 4 |
| wt-149250-149370 | 5522 | GGGGTGTGGAAATGTTCCGAGCCCTCAGCTGAGGGTCTGGCCCGCTTCCACTCTGTTGGTGAAGCAGTGAAGACCCGGTGGAGGAGTGGGACACGACAACCGCCGTAATCTTGA      | 4 |
| wt-149370-149490 | 5523 | GCTCAGGGGGCTCGTAGGTGTGTTGATTCCAGTCCGTTGTAATTCAGCAACTAGGAGAAATACAGAGGCAACCCAGGAGCGTCCGCTCGGCCCATCTCCCGCATGCCAGTCTCGCCCTC | 4 |
| wt-149490-149610 | 5524 | CTTAGGGTAGGGTTGTAACGCAAGGCAATAATCACATCATCCAAATAGGGTCATGCCACCTGACGCTCAGCGGGCCCTCTCGTTTCAGTTCGGCGTGTCCACGGAGACTCGGACGTA   | 4 |
| wt-149610-149730 | 5525 | GCCCTTACCGCGGCTATGGCTTTACCGGACACACTTCCCGGGAATGTTGTAATACGGGCTGATGACTTTAGAAATGGGGCGTGTGCTGCCCGAGCAGTGAAGGCAGGACTCGTC      | 4 |
| wt-149730-149850 | 5526 | CTGGCTGGTGACGGGAGAGCCACTGAGGAAGTCTGGGGCTCGTGGTGTGTTAGCTTGTCCCGCTCTGGGTGACGAGCGTGTGAGTGAATGTCGCTTCCCGGGCAGAACTCGCAG      | 4 |

|                  |      |                                                                                                                                     |   |
|------------------|------|-------------------------------------------------------------------------------------------------------------------------------------|---|
| wt-149850-149970 | 5527 | GTAGAGGTAGGGTTCCTGACCAATCTGATGGGCACAATGTACCAAGTAACTCCCTTCTCTATGAACAGCTGCGCGGATTGAGGAGCTTAGCACGATGCTTGGTCCAGAGTGCAT                  | 4 |
| wt-149970-150090 | 5528 | AACGAAGAAGGGCTTGAGGAATACCTCGTGTCTTCCGCTCCAAGAACAACAAACCGCAGCGTAAAGTAGCGGCTGCCGTAGGTGGTGGTGTGAGAGGAAAGAGGTAACCTTGAAAGCT              | 4 |
| wt-150090-150210 | 5529 | GAGTATCTGGCCACCAGGGGGCAGGAGGCGAGCTCTGGCACTGCGCGTCCAGTGAACATACCTGCTTGTGGTGACGCGGAGCTATGAGGGGAAGATCTGACTTCCACACGCTCT                  | 4 |
| wt-150210-150330 | 5530 | CATGAACACAGTGTCTGTTTTTCAGTGGGCGCAGGCGCGCGGAGGCTGTTCCAGAACACAGAGCGCGGGACGCTAGTGTGCATGGGCTCCTCCGGGGTAAGCTTCGGCCATGCCC                 | 8 |
| wt-150450-150570 | 5532 | GGCCAGAAGAGCGCAAGTCCAAGTCTGGTGCTGGGGCCGATGTGCAGCGTTTGTGCCCGCAGTTGTAGACTGTCAATTTTTATGGCGAGTGGGCGGTCCACACGCGGGCGCAGCACC               | 4 |
| wt-150570-150690 | 5533 | CATTGGTGCACGCGCTCCCTGGAATGTAACCCACCAGAGAGGGGCTGCCGCGCTGGAGATGCCCTGTCACATGTATTTTCCCTCTGGGTGGAACAACGGCGTGTCTCC                        | 4 |
| wt-150690-150810 | 5534 | GGGTGAGGGGAATAGCGTCCAGGCATCTTTCAGGTACAGACCGGGGCTCATGCTCAGAGAACGCTCCCGGGCGGTGGCGGCGGGCTCCACGAGAACGCTGCCAGACCCAG                      | 8 |
| wt-150810-150930 | 5535 | CCCTCTCGGCCCTGTCCACCTGTATGTCCAGGTGCACGACCCGAGGCTGCGTCTGACATGGCCAGGCTGGTCCAGCGGACCCAGCTCCCGTGCCAGCGGAGGCCCGCCAG                      | 8 |
| wt-150930-151050 | 5536 | AGCAGAGCCCGGACTGACTCAGGGCCACATCCCTCGGCGCGGAGCCGCTCGCCAGCCCCGGGCTTCATGGGCGCGCTTCTACCTCTCCGGCACCCAGCTGGTACGCC                         | 8 |
| wt-151050-151170 | 5537 | GACAGGAAGCATGACCTTGGGGTGGGACGGGGCAGCGTGATCCTGGGCGCAATCTTGGCGATCCCACACCTTCACTCCTTGTAGTGTGATAGAATGTCCGGTACCACGCGCGGG                  | 4 |
| wt-151170-151290 | 5538 | GGCGGGCCGCATAGGGAAAAGCAGGAGAGCGATGTGGGCGAGGATGGCTCAGGCGCCGCCCAGACACGCAATTTGCCCTTGGCGGGCCAGCTGCCCTCGGCGCGGCTGCC                      | 4 |
| wt-151290-151410 | 5539 | CCAGCTCCGTCACGGGGGGCAGATGAGGGGATATCTAGGTAGCCAGCCTACACAATAGAGGCGAAATGAGTCCGCGTGAAGGTGACGTTGCATATCAGCGCGGCTTCTTCCGAAATTTTGTCCGCAAAAGT | 4 |
| wt-151410-151530 | 5540 | AACATGGGAGCGTGCACCTGGAAGATGCAGCTGGGAGTAGATCTTACATCTTTACAGGGCGCAGCGCCGCCAGACACTGAAGGGCAGAGTTCACGGCGGGACCTCCAGAGGGAGGCC               | 4 |
| wt-151530-151650 | 5541 | ACCAGCCGTACTGGCCACGGCCAGGGCCTGTAGGCGGAGAGGGGACGGGAGCTTGTGGTACTGTCCCTCCGGCAGGTGGAGTGGGACACAGTATGAGAATAGTCTCTGTGTC                    | 4 |
| wt-151650-151770 | 5542 | CCTATCTCACCCGCCAGCCTGTGTGTGCAATTTGCAGTGTGACGGCCATCCTCGCAGTGTGACTGACTAGGACCTTTCTGAAGTATCTGGCGGTAAGTGTACCTGGTCTTGAGAGAGT              | 4 |
| wt-151770-151890 | 5543 | CCATAAAATGGCTGAAGCTCCAGGCTATAGTATAATGAGCAACAGGGCCAAACAGCGCGGGCGCTGGGTAGTAGCGGGCAACGAGAGACTCTGTGCAATCAAACCCAGCTCCCG                  | 4 |
| wt-151890-152010 | 5544 | CCTCACCAGGAAGAGCAGCGGACGGGACAGCATAAACACGAGGAAGCGCAAATGAGTCCGCGTGAAGGTGACGTTGCATATCAGCGCGGCTTCTTCCGAAATTTTGTCCGCAAAAGT               | 4 |
| wt-152010-152130 | 5545 | TCCAGATGATGATAACTGTGAGGAGGACGATCAGGACTGCCGCCAGTAGTAGCAGCGGCTTTCAGTCTTGGAGGGCGTGTGCATGCCTTGGTGGGGCTTCCCTGCACATGTTGG                  | 4 |
| wt-152130-152250 | 5546 | GGCTCTGTTGAGATTGGCGTCCGGGCCATGATGATGAGGAGGATGATAATCAGCAGGAGTACCAGACAAAACGCCCACAGGTACAGGCACACATTTCTGTGGAGTCTCTTGG                    | 4 |
| wt-152250-152370 | 5547 | GCGTTCGCTGAACAATGCTAGGGTCTTCCAACGCCATACCAAGTGAATCCATACGAGACACTCAGGCCCCAAGAATCATGTTCTGGTCAAAGGCAGAGACCGGTAGACGAGA                    | 4 |
| wt-152370-152490 | 5548 | ACTCCTGAATCATTTTCCAGCACCCAGAGCAGCTTATGAGAAGAGTATCAGCCAGACATCCATTCGGTGAACCAATTTCTTACAAGATGATAACAAGATGCCAGCCAGT                       | 4 |
| wt-152490-152610 | 5549 | TTAGCAAGTCAAGGAGCAGCAGCAGGACGATGTCATGCTCAGGAGGCGCTGACTAGATTAGTGACAGACTTCCGTGCAATGAGCAAGTCTTCCAGCACCGGTCGCCCCA                       | 4 |
| wt-152610-152730 | 5550 | CGGTGGACCCGGGGCCATGGTGAGAGCATTTGCTGGTGACAGGCGAGCTGGTGCTGTGTGTCAGCAAAAAGAGAACTTCCAGGGGAGTTCAGTAAATTTGATGCCACCTCCCTGCC                | 4 |
| wt-152730-152850 | 5551 | TGGTGGACTTCCAGACTATTTTCTGCATTCGCCCTTGGTGTCCATTTGTCAGGAGCAGATTGGAGAAAAAACTGTGAGTTTACAGATCCACGGGCCAGCTCCCTGGGGCTT                     | 4 |
| wt-152850-152970 | 5552 | CATGATCCACCGCCTTCCCGATTGATTGACAAACGCGGCTGCTGAAAGCGGCTGACGAAATCGGTTGAGATTCTGATGAGAGGCTTGGGGGGTCTTTGCCCTCAAGGCAGGCTCC                 | 4 |
| wt-152970-153090 | 5553 | TTCTCCTAGGAATGCCAGCCCCCTGCAGTTCGCTCCACTGGGGATCTTTGCCAGCCTCATACTAGATTAGCGATCCCCCGGTGGGAATCTTCCAGCCGCCCTGCTGTA                        | 4 |
| wt-153090-153210 | 5554 | TCCCCTGTCGCGCGCCTCCCATGGGACCCCTTCTTTCCTTACTTTGGGATTTGAGTCTGCTCTCGCCGCTCTCTCTGTTTAAACGAGAGAATAGTAGTGA                                | 4 |
| wt-153210-153330 | 5555 | GTCCAGTCTCAGGCCCCCTCACTTTGGGTCTTAAAGTGTGGCCGGGCTGTAATAATTCGAGGACGGAGAGGCGCCGCGGAGTGTGTTGAGGATGTTGGCCGCG                             | 4 |
| wt-153330-153450 | 5556 | CACAAGAGCTACTGGATGCGGTGCTGATCTGGGGCAGTCCCTGTTGGCTCGACGAACTTCTGGTAGACGCGCCAGGTGAGGATCTGGGTGCTCTGTAGGCTGAGAGTTCGCGCT                  | 4 |
| wt-153450-153570 | 5557 | GAGCTCCGTGAAAAGCAGAGCTCCCCATGGGACCCCTGCCTTACGAGGATCTGTGATAGGCTGGTTAGGATGTCAATGACGGGCAAAAAGCCACAGGTAGCCCTTGTTAAATGA                  | 4 |
| wt-153570-153690 | 5558 | CTCTTGAAGGGCCGTTGGGAGAGGAGGCTGGCCGCTCCTTTACCGGGATCCGCGACGACGAGGTGAGCAGCAGCCGGCAGCGTGTGTCACAAACTGCAGGCCGCTTCCGGAC                    | 8 |
| wt-153690-153810 | 5559 | GAGCTCCACCCCTTCAATCAGGCTTTCCGGTCCGTCAGCACCCACATATCTCTTTGTAAATCAGCATCAGGACAGAGAAAGTCTTCCGGCTCCAGGAGATGGGGCCACAAA                     | 4 |
| wt-153810-153930 | 5560 | CTCGGGGTTGAGGGGGCCCCAGCGCTCCGGGAGGGGGCCAGGCGCTGACGTTGGCGGGCTCAGGGCTCCACGAAGGCTTGGCCCGCTCCAACATCTGTCGGGCCGTCAGCGTCAC                 | 8 |
| wt-154290-154410 | 5564 | ATCCTCGCAGGCGCCAGCAGCTTCTGATGGCCTTGGCGTGGCCAGCCAGGAGTTCAACAGACTAGCCAAGAAAGGACTCTGTCAGCGTCTCTTTACAAGTGGTAGACGCCCCCGT                 | 4 |
| wt-154410-154530 | 5565 | GAGCCTGAAGGACTCATAGTCTTCCCGGGGCGAGCGGGGTAGCTGTGCTCTTCTCCCGGCTTATCATGGTGAATAACAGAGATTATGAGCCTGAATGATGCTCGGGTAGAGGCT                  | 4 |
| wt-154530-154650 | 5566 | GGCAAAAGTCCACCACAGAACCCGGGAGTTGTGAAATCCGACAGGGGCTGGATGACGGTGGCCCTTGGTAGCCGTCGGTTCAGAGGCGCAGGGCATGGCGAGGATAAAGTTTCCT                 | 4 |
| wt-154650-154770 | 5567 | TTGGGCGCGCCAGGAGGAGGAACACGCGGATCTGTGCCATCTCCAGCAGCGCTGCAAGGGATGTGAGCGATCTGGCAATCTCTGCCACCTCCAGTGGATCACGAAATG                        | 4 |
| wt-154770-154890 | 5568 | GTTTAGCAGATCCATGACCAAGGGCCAGTCCGTGACGACAGTACATGCCAGCCGCTGCCGCTCCGGGCGGCTCAGGGCTCCACGAAGGCGAGGAATCTCTTGTAAATGCACATCTCTTCT            | 4 |
| wt-154890-155010 | 5569 | GGCCCCAGTAGGTGCCTGGCTACTGTGTCCAGCTTGTAGTCTGAGAGGCTGAGCTTGTCCCGGCACACGCGGTACATGTGCATGGGGATGAGGCCGTGATGCGGACCTTGGTGGTGGC              | 4 |
| wt-155010-155130 | 5570 | CCGCAAGAAGCCCTGCCCGCATATGGGGTGCCTGACCTCGCAGACGCCCCAGCCCTAATTTGCCAGAGAGGCTGGGTTGATGCTGTAGATGTGCTGGCTGTGCCAGAATGTA                    | 4 |
| wt-155130-155250 | 5571 | GGCCAGTCAAAGTTGGCCACGTTGAGCGGTGCAATCTCCAGCCTGAGGTTCTGATGAGCTGGAAGAAAGCCGTTAGAGCATGTCCAGCTCCGATGGGAATCCTGAGACCTCAACCC                | 4 |
| wt-155250-155370 | 5572 | CTCTATGTCTTCCAGGTGCCAGCTCAGCAGGATGCGCTATAGCGCCCGGCTCCCTCCTGTCAGGACAGGAGCGGAGTATCTGAGGATCAGGTGACGCTCGTGTGGTGGCCG                     | 4 |
| wt-155370-155490 | 5573 | GGGAAAGCCCTCCCCAGACACTGATATCGAAGGCCAGGGCTGTAGGAGGCGCAGGAGCTGTTACGCGCGGAGCGAGAGGCTGCCACCTCAGCTCGTACTCGAGCTCGGC                       | 8 |
| wt-155490-155610 | 5574 | GTACGAGTCCCGGCTGGAGGCGGGGATGGCGGCGGCAGCTGTACAGCCAAAGGTGACAAAGTCAATGTCCAGGACAAAGCGGCGGCTGGCATCCAGTGTGCCCTCAAAGATCCG                  | 4 |
| wt-155610-155730 | 5575 | ACACCGTGCTTGTGTGACGCCAGTGGCCAGTGCACACACTGTTGGATGGGAGAGGGTATCTTGTGGTAGTCGCGGATGGTTCGCGTACCCATATGGAACGGCGCGTAC                        | 4 |
| wt-155730-155850 | 5576 | CTTCTCCACCAGACCCGGCAGGGGGTCTGCCGTCGAAAGTCTGCGCTTGGGCGGCTGAGGACTGCAAACTCCAGCTCCAGACCCTGAGGCGCGCTGGCGTAGAAGTAGGCCTGCTG                | 8 |
| wt-155850-155970 | 5577 | CCCAAACAGTTACACACACAGCTGGCCCATCGCCCTGGCCGCGCCAGTGAATGATGACGATGCCACATGGCACCATACCCCTGTTTATCCGATGGAATGACGGCGCATCTTCT                   | 4 |
| wt-155970-156090 | 5578 | GTGCGTACACACCCTCGAGTATGCTGATGAGACGTAAGTCCAGAGGCTTCCGTGGTGTGCTGCTCCCGCCTTCCGCTGCCCTTGGGACGCTGGGCCACACATGCCCTTCC                      | 4 |
| wt-156210-156330 | 5580 | CAGGTACTCCTTGTCCAGGCTTTTTCAGAAAGCCCTTATTAGGTCTTAGGAAAGGTTATAGAAGAGTCCCCAGACATGGTAAAACTCAGTCTCTGCCCTCCCAAGCAGTGGCGCGCG               | 4 |
| wt-156330-156450 | 5581 | GTCTGTGATGATAGCTCTTCTGCGTAGGCTGAAAACGGTCCCTGGCTGCCTGCAATGCTGCTGCGCACTGAGGTCGGCGCCGCTTGTGCTGCTCTTTTGTCTCTGG                          | 4 |
| wt-156450-156570 | 5582 | TTTTGCTCATGCAGCGCTAACATGATGGCTGTAATCTGTCTTACTAATGGGATTAATGCCTGGACCCCTCACAGAGGATGTTGTGAGCGAGCTCGTGCATCCGGGGTAGAGCATC                 | 4 |

|                  |      |                                                                                                                          |    |
|------------------|------|--------------------------------------------------------------------------------------------------------------------------|----|
| wt-156570-156690 | 5583 | TGCACCGGCTGCTGCGACATCTGGCGCGTGGCGCTCGTGAGGGAAAATACAGGATCACACCCCCGCCACCAGGACCAGAATGAGCATGCCCGGAAGGGGTTTTGAAGAAGGAGATG     | 4  |
| wt-156690-156810 | 5584 | AAACCAGAGACCAGGCTGCTAAACAAACCCCGCCACCGTGTACTAGTTGGTGTGACTGACCCACGCTACCAGACTGTCCATAAGTTCCCGGAGCCGTCACGAATTTGTTCTT         | 4  |
| wt-156810-156930 | 5585 | CCGTTTGACACTGCATTTGTCACATCTCCGCGAGCGCGCGATGTTTTGCGCTGGAAGTTGTACTCCCGGAAGATGCCCTCCAGGTCAAGACGTTGGAGGCACGCTGTTCCGTCGCT     | 4  |
| wt-156930-157050 | 5586 | GAGTACAGCTCCAGGGAGGCAAAAGTCAATGTTCTCGATGAGGGAGGTGTTAGTGAAGTGAAGGTCTCGAGGTTGCAATGCCGTCAGCTCCGATGTTTTAAAGTGGTGGTAGTCGTTG   | 4  |
| wt-157050-157170 | 5587 | TAGACGTGGATCTCGTTGCCGACTGGAAGTACTGGCTGGTCGCTGGACACCTCCGTCATCTTTTTGTGAGGAAGATCTCGTTGTCCGGTCCGAGCTGCTCCGTCAGCTCCTG         | 4  |
| wt-157170-157290 | 5588 | GTGCTGTGATAAAAGCTGAAGGACACCAGGGGCGGAGTAGCAGATGGTCTCGGAGCCAGCCACTCATGCTTTGCGCAGGTGAGCGTGGCTGTTAACGGGACGAGCTGGGAG          | 4  |
| wt-157290-157410 | 5589 | CTAGAGGTGACATCCCGCAGCGCTTGGCGCCCGGTCACCGTACCTAGTAGCTGGACATGACGGTGGATTAACTTTGGTTAGTTCTCTCAGCACCATGTTCTGCGCTCTTGCTCC       | 4  |
| wt-157410-157530 | 5590 | AGGCACAGCGCCCGCAAGGTTCTCCAGCATGCGGTTGATCTGGCGCGCAGGGAGTGTAGGCAAAATGGATCTGGACGGTGGCGGGATTGTTGAGGGTGCCAGGGACTTCCCGGGG      | 8  |
| wt-157530-157650 | 5591 | GCCGTGGGGGCCACCGGTGTGGTGGCGTTCCCGCATCCCGCTCCGACGCTCAGAAGCGCGCGGGGGTGTCCCGCGGGCCCGGATGGGGCTGGGGCGATGGACTGCTGGGGGT         | 12 |
| wt-157650-157770 | 5592 | GAGGAAGTCGGAGTGGTAAGTCCGTCAGGTCTTGCAGGTGGCCAGCACAGCGCGGGGTCAGAGGTAGCCAAAGTAATAACAACTCCCGCTCGTTATAAAAATGTAATGGCTTCTG      | 4  |
| wt-157770-157890 | 5593 | CCCTTCGTAAACGATCCTGGACGGCTCCTACTTCATGATGATCTGTTGTCACCTGCTCTCGATGCACCTGAAGCGCTCCGGAGCTCTATCCCACGGTGTGTTGGTCCAGGA          | 4  |
| wt-157890-158010 | 5594 | CTAGAGGTGCCCTCGTCAGTCACAAAAATGATTGACTCCCTTTCTGTGGCATGTGTCAGTCAAAGGTTGCGAGTGTGAAGCGGGCAGTACCCTCTCGTCCAGCTCCAA             | 4  |
| wt-158010-158130 | 5595 | GATAGCGTGAAGTGCCCTTGTCCAGGAAGGCTCGCGTTCGCCCTTGCGGTTCGCTCCCTCGTTGTCGTAGTCCACTATCTTGTAGTTAGTTCTCAGTGGAAAGAGTCTGCCGCTCA     | 4  |
| wt-158130-158250 | 5596 | TGGAAGTTTTCTTAATTTCCCGTCATAGAAAGGGACATTTCCACAGTCTGCCCGTGGTGGTCAAAAAGGTCGAAAGGGTGTGGACTTGGCCATCATGTAGTATCAGGCGAG          | 4  |
| wt-158250-158370 | 5597 | TTGACGGTAGTCTTGTCTGTAAGTCCATATCAACCACCCCGGGCGGTATAGAGCTCCGTCGGCTGGCCTGACGGCGCACCCCGTTGCCAGGCCCCCGTGGCGTTTAGGTGACG        | 4  |
| wt-158370-158490 | 5598 | GTGATGTAACTCCGTCGCGTCTACATACAGCGCGTCAGCCCATCTTTGTCATCTTGACCGCTTTAGCACTGGTAGATGGTATCCATCTGGTCAGTTTCGTAGCTGTCAACGGAG       | 4  |
| wt-158490-158610 | 5599 | AACITTCCTCGTGCCGGTTGGTACGAGTCCGCGTACCAGCCATTTAGATGAGAAATTTGGTCACTATCTTGGTGTAGGAGCGGACCTTAACAGGATGGGAATAATGTTGCTTTA       | 4  |
| wt-158610-158730 | 5600 | AACACCATCAACAGGCCCTCCGTGTGATTCTCCCGCTGCCAAACGAGGGACACTGGATGTCCGAGGAGAACCGGAACAGGTCCGGTGGTGGAGAGCTCGCAGACTCGAAAAGGAAG     | 4  |
| wt-158730-158850 | 5601 | CTGGTTTGCTGACGCGTGGCGTGGCTGCACCCTGGTGGCGGGGGTGGGGCTGCTTGGGTTGCCACCGAGACGGCACGCCAGGGCGGCTAGCAGCAGACCACGCTTAGCACC          | 8  |
| wt-158850-158970 | 5602 | CTACGCCAGTCATCTCTATTGGAGGTGCAGGTAGAGAAAGGGATATAGATCCTTAATACCACCCCGCCCTTATACAGAAGAATTAGGGGGCGGTGACAGTCTGACGTGAGGTA        | 4  |
| wt-158970-159090 | 5603 | AAGCCCATCCGGGGCAGGGCCTCCGGGGCTGACCAGCTCCCGCGCGCAGGATCAAGGACCAGCGCCCGGTTGGTGTAGAGGGACACGGTTAGGACGGCCTCGCGCAGCCGCGC        | 8  |
| wt-159090-159210 | 5604 | GCACAGAATTTGCTGGCTAGATGCCAGTGCCAGTCCGGCCCGGGTACCGTGTAGAAGTGTGAAGGAGTCTCTATCCAGTCCGCTGGTCTGATGCTGGCCATATTCAGGGAAGTCA      | 4  |
| wt-159210-159330 | 5605 | CTTCTGGTGGGCGAGCTACCTGCGCGCTCACAGCAGCAGCCAGGGCCACGTTGCTGGTGGGGGAAAGAGCCCGCTCTCTCCCGGAGGGCCCCGATGAAGGTGTACAGGCTGTG        | 8  |
| wt-159330-159450 | 5606 | CGTCAGCGGTGACGCTCCGAGCTCAGGCTGGGTAACAGGTTGTTGTGATGACTGGAATTTCAAAGGCGCACCCCTCCCGCGCGGCTGTCTCCAGGGACCCGAGAC                | 4  |
| wt-159450-159570 | 5607 | GAAGGCCGTCTGTAGAGGAAGTGGTTGCGCATCGCGGCCAGCTCCAGTAGACACGTCGCCCCAGACGGCAGGACAGGCTCCGGTCAAGGTTCTCGCTCTGTGCGCCAGGACGGA       | 8  |
| wt-159570-159690 | 5608 | CTGACGCTGGCCAGACCTCGGTGGCCACTGGCGCAGTACTGCTCCTTGCCTTGAGCGCTCCGAGAGGGCGCGGAGCGGCGGGCGGCTCTCGTCCCCAGCCCGCGGGGCACTC         | 8  |
| wt-159690-159810 | 5609 | CGGGCTCTCCCGGAGCGCTCTCTCCGCTCGGCCAACCCGCTCATGGCTGGTTGAGCGCGTGATACGCTCGTTCTCTTTTGACAGGTAGCCCGGTACTGGGGTGGCGGTGACT         | 4  |
| wt-159810-159930 | 5610 | GGCGGCGCCGAGTCCGCTTACGCGCTCCACCGCGTCCGCGAGAGCTGTAGACCAGGCTGTCACAGAGTCCAGGAGTCCCGGAGGGGGTACCGGAGGCGGAGCCCGGTACCCCTTCT     | 8  |
| wt-159930-160050 | 5611 | TGCCCCCGCCAGCGCTCTCGCAGGCCGCCGACCAGGGCCAGGGCAGCGTCCCGGGCAAACAGGGCAGAGAGGGGGAAATGGCCCGCACCCCTCCCGTCCCGGTTGACCGATAGC       | 12 |
| wt-160050-160170 | 5612 | ATGGCGCCAGAGTCCAAATAGAGGAGCTCCGAGAGCTCCGCCACCTCCGGGGCAGTGTGAGAAACAGTGTGAGGTGTCCAGCGCTTGGTCCGCCCTCTGCTCCGGCCCGCCCGG       | 8  |
| wt-160170-160290 | 5613 | GCCCCGACCGCGCCCTCTCTGGCCCGCCCGGCTCGCCTTCTCCTCAGCTCCAACAGGTGCCCGAGCCCGGCTGGCGGACTTCATTTCAAACAGTCCCAGAGCCCGCTCCGGATT       | 8  |
| wt-160410-160530 | 5615 | GAGCGCGGGTCTGGATGGGACTACGCCCGAAAGCGGCCAGCAGATCCAGGGCCGTTCCAGGCTTCCAGCCCATGGTGTGAGACATGCAATAAACAGCTATTGATTTCTCTT          | 4  |
| wt-160530-160650 | 5616 | CATTAAAATCTATGTCATTTATTAGGCACAAACTTACATCGACTTATGCCCCCGTAAACTCCACAGAGTACGGAGTCCGCGACTGAGGGGGTACGGAGGGCGGGACCCGGTACCCCTTCT | 4  |
| wt-160770-160890 | 5618 | CTCCAGCTCGGCCAGCAGCGCGCGTTCGCGCACCACCGCAGCCAGTCCAGACTCCGGGGTCCAGCCGGTGCACAGCTCAGCTCAACCCGACGGGCTACACCTGGCTGTAGCGCGC      | 8  |
| wt-160890-161010 | 5619 | CGCCAGCAGCCCGACATCGCCCGCCGAGGGTCTTAGACCTCGAGTCCGGGGAGAACGGTGGCCAGACGGCGCTTGCCTCTGCCCCGAGCGCTGCCCTCTCACCCAGCAGCAGC        | 8  |
| wt-161010-161130 | 5620 | CGGGCGAGCGCTGCGACGCGGTGCTGACCGGCTGGCCACGCTGATAAAGTTGCTGGCTGCCCGGGCCCCACCCACACTCCCTCCAGAAAGTCCCAGCGGCTCCGGCTCCAC          | 8  |
| wt-161130-161250 | 5621 | TCTATCCCGCTGGAGGCAATGGTCGCCAGGTTTTTAGGACGCTGTCGCCAGGACGGAGAAGCGCCCAATAAGTACTCCCGTCTGCTTCTAGTCCAGGCGCAGTCCCTGCCCATG       | 4  |
| wt-161250-161370 | 5622 | GCATCCACAAGGTTGCACACCACATCAAACACACAGTCTTCCCTCTGTTTTGATATAATGGCTCCAGGCCAGCCCTGATGTTCTCAATCTCATATGTTGGTCGCGCTTGGGTCGGG     | 4  |
| wt-161370-161490 | 5623 | CGTTCACGGTCAACCTAGGGTGGGGTGGCAAAGACAAACTTCTCCGATGGAAGAGCCCGGGGCTGTCGCGAGCCAGCCCGGGGGCTGCAGCAGGTTCTGTCCAGGCC              | 8  |
| wt-161490-161610 | 5624 | CGGCCATAAAGTATCCAGGTTCCCGGCTGGAATATCTGGTTGTGGGTTGACCCCGTGACTTGTGATGGTCACTGGCAGGTGACAACCGGACGGGCTTGCAGACTGGCTA            | 4  |
| wt-161610-161730 | 5625 | AGACAGTCTGTGCGCGCAGACCCGTTGGTGCAGTAAGGAGGAGGTGGCCTCCGCGTAGGCCGCTGCCACTCCACCGCCCGCTGCCAGTACGTTGGGGTAGTCAACGGCGGGC         | 8  |
| wt-161730-161850 | 5626 | ACCGACTCGCTCCTGGCACCAGTCCCTGAATCAGGCTGATGTAGAACTGGGTCGGCCGACCGCTTCCAGGTAGGGCTTGTGAGCCCTGCTTTGGCTAAGTGACCAGTTGCCAGGC      | 4  |
| wt-161850-161970 | 5627 | ACCACACTATGACGTTGCTCTCTTGGGGCCGGGAGCCCGCTCCACAAAGAGGGCAGGTACAGTACTCCCGCTGCCCGCTGGCCCGTGCCGAGAGCCGAGCGCGCTTGGAA           | 8  |
| wt-161970-162090 | 5628 | AAGTTGTGCCACAGGTACAGGCTTGCAGGCTTAGTGTCCGGAAATAGGTTCTTGGTAGGTTTGGAGAAATTCATGTAGGGCCCGTTGATGTAGTTCCTCCCTCTGGTAGTGGAC       | 4  |
| wt-162090-162210 | 5629 | TTGATGAAGCTGTTCTGGAGGGCGCATTCTCCCGCTGAAGACCACCTGTTCTTGTGATGTTCTGGGACACAGCATCAGCACCTGGACATGCGCAGGACGGCCGCGCCG             | 4  |
| wt-162210-162330 | 5630 | TACACCGGCCCTGACGGCCCGTCCAGGTCTGCGAGGTGCGAGTGGGCTCCCGTGCACACCTTGGCCCTTGGCCGAGGACCCCTGTCGATGGCCAGGCTCTAAAGTTG              | 8  |
| wt-162330-162450 | 5631 | GTGCACGCTCGTGGTAGTGACCTTTAGCCACTCTGGGGGGCTGCGGCAAGCCCGGGTTGTCTATTCTATGACACATACAGATGGGACGGGAGATGCTGACAGGATGGTCCAGCT       | 4  |
| wt-162450-162570 | 5632 | GAGCCAGTAAACAGCTGGGTGAAGTGGGCGGCTGGCCACCTGCGCAAAGAGGGTTGACAGACTGCATGCAGTGGTAGGCTTTGACCAGGCTTGTGAGTGTGTTGCTTGGCC          | 4  |
| wt-162570-162690 | 5633 | ATGCTGTTATAAAGTGGACACTTCGGCTCCACCCCGCATCCACGCTTGAACATCTGACAAGTCCAGCGGGCCATGGGGCTCTTCTAGCTTCTCCAGCCTCATGGCC               | 4  |
| wt-162690-162810 | 5634 | AGCCGAGACAGCCGCTCCAGCAGGTTCTGGTTACGTGCCAGTGGTGTAGCGGGGCTCGTCTCGCGCCGCTGCCGTGCTCTCTTATCGATGAAGTGTGAAGGTTGCCAAAAAG         | 4  |
| wt-162930-163050 | 5636 | GGGGCCCGCTCCGACAGCGAGCAGCATGGGACTGGCGCGCCCGCCACGACTGCCGCTCCGGCAGCCGGGTCAGAGAGCTTCTGTCCCTGGCAAATGCAGGATGAGT               | 8  |

|                  |      |                                                                                                                                    |   |
|------------------|------|------------------------------------------------------------------------------------------------------------------------------------|---|
| wt-163050-163170 | 5637 | GCATAGCGGGCAAGAAGTGGGCGAGAAAGGAGGCCGCATAGACCAGGTGCTCCACAGCGTAGTTTCCCGGACCGTTGGTTCGGGTACAGCTGCGCCACCAGCCGAGCCGAGAAGCAGGGT           | 4 |
| wt-163170-163290 | 5638 | CGGCGCAGGGTCCCAGGTCCTCCTGCAGGGTCCCAGGCCGTGGGTCAATGTAGAAGCTGTTAAGAGACTCTCCTTGCCCTGACCGGTTGACTTCGAGACCCCGAGACGTAGAGG                 | 4 |
| wt-163290-163410 | 5639 | ACGGAATTGGTGGCAAAGACTGCGTGGACACGTGGGGGGCAGGCTGGCATTATATCGGTGTAACGCGACCCACACGGCCCTCTGGACCCTCACAGTGGCAAACAGGGGCCACGAGTCG             | 4 |
| wt-163530-163650 | 5641 | GTTGAGGCTGGGAACCTCTTGAAGGGGGCCACCTTGCCACCTTGGCCTGGTCTGCGAGGCTGCTTCTCCAGCAGCTCCACCAGCTTGCCCAACCGTCGGACCGCGAGCCGCTCGCC               | 8 |
| wt-163650-163770 | 5642 | AGCCCGGTGTACAGCGCCCTCGTGCATGCAGCGGCTGAGGTCCGAGTGTAAAACCTGGCGGAGCTGGGGCAGCCCTCTGGGAACACCTCTTGTCTGATAGCGGGGACCCTAACGCTCGCA           | 4 |
| wt-163770-163890 | 5643 | GACTGCCCCACCGCTACCTCTGTTTTAACGATGGAATGGCCACCAAGTTCGGCTGTAGACTGCTCTTGAAGGCTCGGTATTGCCACCAGCCAGGTAGCAGAGGGATCTAGC                    | 4 |
| wt-164010-164130 | 5645 | GGGGGAACCATATGGGCATTGTGGAAACAGCTAGATTGCCCTGTGATAGCGAGGTAGCCAGGCTGGCCAAAGGAGGCTTCTCATCCCGGGTGAACACCGCTGTGCAGAGCTTACATTGATGCTGAAGGCC | 4 |
| wt-164250-164370 | 5647 | CCGCACGGACCCGGCTGGCTCTGGCTGCCAGATTATCCTCGTAGTCTGTGCACCCTGCATGATGCCAAGGTATCGCCCCGGCTCCCAAGTCCCACTTAAATGTTACACTTTACTCA               | 4 |
| wt-164370-164490 | 5648 | TCACGCAACACCCACTGTTTATTATTACAAGATTTAGGAAAGTCACTAGGCTGGCCAGGCCCCAGCTCACGGGAACTGACGCTCAGCGATCTGGCATGCCCGCCAGCCTCGCA                  | 4 |
| wt-164490-164610 | 5649 | AACCAGAGCTCTGCATAGAGGGCCAGGTAGTGGGCGATTGCCCCAGCAGAAAGCGCGCTCTTGTGGTATCCAGGTAGTTTCGACCAGCAACACCACTGTGTAGCAGACACCACC                 | 4 |
| wt-164610-164730 | 5650 | CTGAGCGCGACCAAGTAGTCTAGTGGCTGTGTACTGCGCCAGGACGCTGATGATGAGCCGTACGTGCTGTTTCGCCCGATGTCGGCTGTCTGCAGGCCAGCTCCGCGTAC                     | 4 |
| wt-164730-164850 | 5651 | AGCTTCTATCTTCTCAGGGAGGCTTGTATGAGCGGCAGAGACCAGGAGGCTGGCCAAAGGAGGCTTCTTCTATCCCGGGTGAACACCGCTGTGCAGAGCTTGAACATGAGTGAAGGCC             | 4 |
| wt-164850-164970 | 5652 | GACTCAGCCACTTGTGCTCCGCGGCGAGGGCCGACCCACGCTCGACCAGGCTCCTCACAAACACAGAACTGTAGACTTGGCTGGCTCATGGTCTGTCAGGCCAGCTCACGGGC                  | 8 |
| wt-164970-165090 | 5653 | TTCAGGCTTATATGATAAAATGGGCGTGGCAGAATAGTATAAGACGCGAGGCTGGGTGAGGAGAGTCCAGAGCAATGGCCAGGTTATCATGCTCAGCTCCTCTGTTGGCCTCTGTGTG             | 4 |
| wt-165090-165210 | 5654 | GCCGCGGCGCAGGCTGTACCCGCTTCTTGGGTGAGCGAGTCAACCCTGACCTCCTACTGGAGGAGGTGAGCCTCGGTCCAGAGATTGAGGTCAGCTGTTAAACTGGGCCCAGGAGAG              | 4 |
| wt-165210-165330 | 5655 | GAGCAGGTGCTTATTGGGCGCATGCACCAGATGTCATCTTATAGAGTGGCCTTTCAGGGGCTTCTTGTATATCCACAGAAGTGGCAACACCTTCTTTTAGTAGTACCAGCTGCCAAC              | 4 |
| wt-165330-165450 | 5656 | ATCTCCCATGACGGCAACTACCTGTGCCCATGAAACTGGCGAGACCAGGTCACCAAGCAGGAACACCTGAGCGTGGTGAAGCCTTCAACCGTGTCTGCCACTCCGAAAGGTCTCAG               | 4 |
| wt-165450-165570 | 5657 | TTCACAGACTTCTGTGCTTACTGTGACATGCACCGTGAATGCAATTTCCCATCCCCACGTCACAGTGGCTCATGCCGAGGGCGTGGAGCCCGACCAACTGCGGCAAAATGGCGGTGT              | 4 |
| wt-165570-165690 | 5658 | ATGAAGAAAAGGATGGGAGCCTCTGTGTTGCTGTGACTGTCACTTCCCAAGCCCTGGCACCTGCCAGTGACCTGCGTTGGGAAAATGACAAGGAGGAAGCCACGGGGTTATGTT                 | 4 |
| wt-165690-165810 | 5659 | TCTGGATACTTGTGCAATAAACGCACCTTGCCTATTTACCTTGTTTTAGTGTGGCATTGGGGGGTGGCATTGCGGGTGGATAGCCTCGCGACTCGTGGGAAAATGGGCGAAAGGGCAC             | 4 |
| wt-165810-165930 | 5660 | CGTGGGAAAATAGTCCAGGTGACAGCAGCAGTGTGTGAAGATTGTCACAGCTGCTGGTTTGAGAAAACGGGGTGGGCGGTGATCAGGGAGAAACAATCCCCGGGACACCTGCACGA               | 4 |
| wt-165930-166050 | 5661 | GACCCCTGGCTCAGGAACTCCGCGACTTGGCAATTGGGCTAGTGTAGCGCCGGGTTTACAGCATACAGGTTATTTTGGAGCCTTGGTGGGCGTAAATCCCTCTCG                          | 4 |
| wt-166050-166170 | 5662 | CCTTGTTTCTCAGAGACATTTTCAGGCGGTTTTGCACTGCTGCTGCAGCTATGGGTCCCTAGAAAATGGTCCAATGGGCGCGGTTCCCTAGCCCGCGGGGATCCGGATGGTA                   | 4 |
| wt-166170-166290 | 5663 | CGATGGCGAAAACCTCCCAATATCCATCTGCTTCTGGCTTCTGGAAACACCCACCCACCCAGCAGTGAAGAACGTGAATCTAATGAAGAGCCCCACCCCTTATGAGGACCC                    | 4 |
| wt-166290-166410 | 5664 | ATATTGGGGCAATGGCGACCGTCACTCGGACTATCAACCACTAGGAACCCAAAGATCAAAGTCTGTACTTGGGATTGCAACACGACGGGAATGACGGGCTCCCTCCCTCCTACTCTCC             | 4 |
| wt-166410-166530 | 5665 | ACGGGAGACTCATCTCAACACATATACGAAGAAGCGGGCAGAGGAAGGTAAGATGCCACTATCTGTACTTTTATTATGTCATCACAAGTACATCAATAAAGGGGCGCATCTAG                  | 4 |
| wt-166530-166650 | 5666 | CGGGAGATGTTATCCACACCATCCAATTCATCTCAGGACCAACAGGTCAAAAGTCTTTTGTACACCCCGCAGCTGGCTCCAGGGGTGGAAGGCTGGATGCAGTCTCCGCTAC                   | 4 |
| wt-166650-166770 | 5667 | GGGGCGGACGCTCTCCCAACGCTTTCTGCGGATCACTGCTGGCATTGGGCTGGGAGACAGGGATGATGTGTTCCCGGCTGGTATGCCAGTACCCTGGGAAGTAAAGGGCCCA                   | 4 |
| wt-166770-166890 | 5668 | GGACATTTCTGAAGAACGGCGGAGAGTAGCGTGAATCCAGCCAGTGGTCTACCCGGTGCATGGTGGCTTCTTAGATGAGGAGCAGGCATAAAAGTCCAAACAGGACACAGAGTAC                | 4 |
| wt-166890-167010 | 5669 | CACCAGGAGTAGTCTTAGTCTGCTGACGCTGGTCTCGGGCAGGGGTGGCTAGGCCCTGGTCTCCGTAGAAGAGCCGGCAGGCCGAGGAGACTGCTGCTTAGCAAAGCACC                     | 4 |
| wt-167010-167130 | 5670 | CTCCAGGACGTGACCATCTCGAGAGTGAAGCACAGCTGTTTTCGTTGACTTTTATACAGTAAGGACAAGGAAAAGGCCAGAGGAATGTGAAAAGATGAGCGAGGACAGGTGTGGAGG              | 4 |
| wt-167130-167250 | 5671 | TTTTGGCTAGCTCTTAGTTTCTGGGTGTGAGAGAGGGATAAAGTGCCTTATGCGCAAGAATGTGTCAACAACAGGTGTTCTGCCTGCTGCGCATGAGTTAGTGTGGCTTGGGCTG                | 4 |
| wt-167250-167370 | 5672 | AATCCAAATGTGATTGGCACAAGATGAAAAGCAAAAGTTGCTGGAGTACTGGGTGGGAGACAGGGATGATGTGTTCCCGGCTGGTATGCCAGTACCCTGGGAAGTAAAGGGCCCA                | 4 |
| wt-167370-167490 | 5673 | TCTGCCTGGTAGTGTGTTGTGCGAGAGTCTGATGTGTGAGGAGGGTGGGTTCAACGCAGGGGCGTGGTGGCGAGTCTGGCAACGCCCAGGTCCTGCTACCTGTGTGGTGTGTTA                 | 4 |
| wt-167490-167610 | 5674 | AGGGCTGGTAAAGGTGCTGCCAATTCTCGCATGTCTCCTTCCCTTGTGTTGAAAATAGAATGAAATGTGGCTTTCAGGCTAGACAGACAGTGTGGCTAAGGGAGTGTGTGCCAG                 | 4 |
| wt-167610-167730 | 5675 | TTAAGGTGATTAGCTAAGGCATTTCCAGTAAATGGAGGGAGAGTCAGTCAGGCAAGCCTATGACATGGTAATGCTTGAAGTAAAGAAAAGGTTAGTCATAGTACTGACTGAAGTGGC              | 4 |
| wt-167730-167850 | 5676 | CGTGGGGTCTCATCATCTCCACCCGAAACAGAAACCCAAAAGCAGCTAGGAAGGTGTGGATCACCAGCCCATGGCCGGAATCATGACTATGACCGCCCTCCGCTGTGTCATCA                  | 4 |
| wt-167850-167970 | 5677 | AAGGCGGGCCCTGGTCACCTCTTGTGTTTTCAACCTCTCCGTCATTTGTTGGAGGGCCCTCATCATTCCAGCAGAGTGCCTAGGGCTATGAGGCAGCGGGTCTAGTGGCCATTGTCAT             | 4 |
| wt-167970-168090 | 5678 | CAGTGTGTCAGGGTCTGTTGGGCCATTGTCATCAGTGTGTCAGGGTCTGAGGCAGCGGGTCTGTGGCCATTGTCATCAGTGTGTCAGGGTCTGTGGGCCATTGTCATCAGTGT                  | 4 |
| wt-168090-168210 | 5679 | TGTCAGGGTCTGTGGGCCATTGTGAGGACCCTCCAGGTGCGCTAGTTTTGAGAGCAGAGTGGGGTCCGTCGCCGGCTCCACTCAGGACAGGTGGTGTCTGCCCTCGTTGGAGT                  | 4 |
| wt-168210-168330 | 5680 | TAGAGTCAGATTGATGCCAGAATCATCGGTAGCTTGTGAGGCTGCGGGAGGGATCATCGTGGTGGTTCATCACTGTGCTGTTGCCATGGTAATACATCCAGATTAATAATCGCCA                | 4 |
| wt-168330-168450 | 5681 | GAAACAGGAGGCCAAAGGAGATCAACCAATAGAGTCCACCAGTTTTGTGTAGATAGAGCAATAATGAGCAGGATGAGGCTAGGAAGAAGGCTAGGAAGAAGGCCAAAAGCTGCC                 | 4 |
| wt-168450-168570 | 5682 | AGATGGTGGCACAAGTCCGACAGACTCTCCAATAAGTAGATCCAGATACCAGTCCGTTGAAAAGAGGTGTTAGGGTTGAAAAGTGGGGGTGTGGTAATAATTCTTAGGGAA                    | 4 |
| wt-168570-168690 | 5683 | TGTTAGATCTTACCAAGTAAACACCCGAAAGTAAACAGCACAATCCAAGGAACAATGCCTGTCCGTGCAAAATCCAGAGAGCGATGAGCAGGAGGGTACTGGGGAAAGAGGAGAAAAGT            | 4 |
| wt-168690-168810 | 5684 | GCGTTAGAGAAGGAGTAAGGAAAGGGGTTGTTGGCCAAAGGGTGAATACTTACTCATCAGTAGGAGTATACAAAGGGCTCCAAGTGACAGAGAAGGTTCTTCTGAAGATAAAG                  | 4 |
| wt-168810-168930 | 5685 | ATGATCAAATAATAAATAAAGCATGAGAGCAAAGGAATAGAGGACAAGGAGGGCTCCTCAGTCCAGTCACTCAACCATGTACAGCCAAAACAGTACGCGCAAGAGGAGGAGAAGG                | 4 |
| wt-168930-169050 | 5686 | AGAGCAAGGCCTAGGGAAGAGGAGAGGGGGGCTCCTCAGGGGGCTCGCGGGCCCCGTGGGCCCCCTCAAGGTGCTGTTCCATCCCTCAGGGCAGTGTGTCAGGAGCAAGCAGTTGA               | 8 |
| wt-169050-169170 | 5687 | GGAAGAAGGGGCGAGCAGTGTGAGGGCTTATGAGGGCGACTACGTCAGATACCGGTGTTCTTGGATGTAGGCCCCGGGGATTTGCGGGCTGCCCCGAGGACAGCTACGGGT                    | 4 |
| wt-169170-169290 | 5688 | ACAGATTTCCGAAAGCGCGGTGTGTGTGTCATGTAAAGCTAGAAAGGGGAAGTAGAAAGCGTGTGTTGTGTTAGAAAAGCGGGTCCCCGGGGGCAAGCTGTGGGAATGCGGTGGC                | 4 |
| wt-169290-169410 | 5689 | CAAGTGAACAGAAATGAAAGGCAAGTCCGGAATCAGAAGGGGAGTGCAGTGTGTTGGGAAGCGGCAAGTGAATCTGCACAAAGAGGCGGGGGCGCCCAACGTTGGGAGGTGCT                  | 4 |
| wt-169410-169530 | 5690 | TGGCGCAGGCGGGAGGCCGTGTTAGGGGGTTCAGGTGAGGCAAGGCTGTGGGTAAACCGTAGGGGAGGCGGTTGAGGCGCTAAGGGTCTGGCGGGTACGAAAGCAGC                        | 8 |



|                   |         |                                                                                                                                              |    |
|-------------------|---------|----------------------------------------------------------------------------------------------------------------------------------------------|----|
| wt-169530-169650  | 5691    | AGACGCGGATATGGGAATTCAGAATGAGGTGGCGGATTCAGCGGAAAAGGGTGTGGGTGTGCGAGTGTGATGAGCGAGGCGCGAAAGTTCGTCGCGCTTGTGGGCATGGGGGGC                           | 4  |
| wt-169650-169770  | 5692    | CGCGCATTCTGGAAGAGTGGAGGGGCGTGGCCTTCCCGCGGGCCCCAGCCCCCGCACAGAGCGGCCTACGCGGGCGGGCGGGGGGTGGGGTCCCGCGGCCTCCGGGG                                  | 12 |
| wt-169770-169890  | 5693    | GCTGCGGGGCGTGGATGGCGGCGACGTTCCGGGGATCGGGGGGTGGGGGGCCTCCGCGGGCGCAGCCATGCGTGACCGTGATGAGGGGCGAGGTCGACGGGGTGTGTCTGGTGG                           | 12 |
| wt-169890-170010  | 5694    | GGGCGGAGCGGGGGCGCGCGGGAGCCTGACACCGCTTGGAGGGTAGAATGACAGGGGGCGGGACAGAGAGGCGGTCGCGCCCCGGCCGCGCCAGCCAAAGCCCAAGGGGGCGG                            | 12 |
| wt-170010-170130  | 5695    | GGAGCGGGCAATGGAGCGTGACGAAGGGCCCCAGGGCTGACCCCGCAACCTGACCCGGGCTCCGGGGTACCCAGCCAAAGCGTGACCAAGGGGGCCCCGGTGGTGACACAGGCAACCT                       | 8  |
| wt-170130-170250  | 5696    | GACAAAGGCCCGCCAGGAAAGACCCCGGGGGGCATCGGGGGTGGGGGCGCCGATTCGCGGAAAAGTGGAGGGGGCTGGCCCTTCCCGCGGGCCCCAGCCCCCGC                                     | 12 |
| wt-170250-170370  | 5697    | CACAGAGCGGCGCTACGCGCGGGCGCGGGGGTTCGGGGTCCGCGGGCTCCGGGGGCGCAGCCATGCTGACCGTATGAGGGGGAGGGTCCGCGGGGATCGGGGGGTCCGGGGCGG                           | 12 |
| wt-170370-170490  | 5698    | GGCGCAGCCATGCGTGACCGTGATGAGGGGGCAGGGTGCAGGGGGTGTGTCTGGTGGGGGGCGGAGCGGGGGCGGCGGGGAGCCTGACGCGCTTGGAGGGTAGAATGACAGGGGGC                         | 8  |
| wt-170490-170610  | 5699    | GGGACAGAGAGCGGCTCGCGCCCCCGCGCGCCAGCCAAAGCCCCAGGGGGGGCGGGGAGCGGGCAATGGAGCGTGACGAAGGGCCCCAGGGCTGACCCCGGCAACCGTACCCGGGG                         | 12 |
| wt-170610-170730  | 5700    | CTCCGGGTGACCCAGCCAAAGCGTGACCAAGGGGCCCTGGGTGACACAGGCAACCTGACAAAGGCCCCCCAGGAAAGACCCCGTGGGGCATGGGGGGCCGCGCATTCCTGGAAAAAG                        | 8  |
| wt-170730-170850  | 5701    | TGGAGGGGGCTGGCTTCCCGCGGGCCCCAGCCCCCGCACAGAGCGCGCTACGCGGGGGCGGGCGGGGGTGGGGTCCGCGGGATCCGGGGCTCCGGGGGTCCGGGGCGGTTGCG                            | 12 |
| wt-170850-170970  | 5702    | GGCGGAGCTTCGGGGATCGGGGGGTTCGGGGGGCGCGGGGGGCGCCGCGGGCGCAGCCATGCTGACCGTATGAGGGGGAGGGTCCGCGGGGATCGGGGGGTGTGTCTGGTGGGGGGCGG                      | 12 |
| wt-170970-171090  | 5703    | CGCGGGAGCTGCACGCGTGGAGGGTAGAATGACAGGGGGCGGGGACAGAGAGCGGTGCGCGCCCCGGCCGCGCCAGCCCAAGGGGGGGCGGGAGCGGGCAATGGAGCGT                                | 12 |
| wt-171090-171210  | 5704    | GACGAAGGGCCCCAGGGCTGACCCCGGCAACGTGACCCGGGGTCCGGGGTACCCAGGCAAGCGTGACCAAGGGGGCGTGGTGACACAGGCAACCTGACAAAGGCCCCCCAGGAA                           | 8  |
| wt-171210-171330  | 5705    | AGACCCCGGGGGGATCGGGGGGTGGGGCATGGGGGGCGCGCATTCCTGGAAAAAGTGGAGGGGGCGTGGCCTTCCCGCGGGCCCCAGCCCCCGCACAGAGCGGGCTACGGC                              | 12 |
| wt-171330-171450  | 5706    | GGGCGGGCGGGGGGTGGGGTCCCGGGCTCCGGGGTTCGGGGCGGGTGGATGGCGGGGACGTTCCGGGGATCGGGGGGGTGGGGGGCGGGCGCGGGCGCAGCCATGCGTGACC                             | 12 |
| wt-171450-171570  | 5707    | GTGATGAGGGGGCAGGGTGCAGGGGGTGTGTCTGGTGGGGCGGGAGCGGGGGCGCGCGGGAGCCTGCACCGCTTGGAGGGTAGAATGACAGGGGGCGGGGACAGAGGGCGGTCG                           | 8  |
| wt-171570-171690  | 5708    | CGCCCCGGCGCGCCAGCCAAAGCCCCAAGGGGGGGCGGGAGCGGGCAATGGAGCGTGACGAAGGGCCCCAGGGCTGACCCCGGCAACCGTACCCGGGGCTCCGGGGTACCCAGCCA                         | 12 |
| wt-171690-171810  | 5709    | AGCGTGACCAAGGGGGCGTGGGTGACACAGGCAACCTGACAAAGGCCCCCCAGGAAAGACCCCGGGGGCATCGGGGGGGTGTGGCGGGGGCATGGGGGGTGGATTTCGCCT                              | 8  |
| wt-171703-171823  | 5710    | GGCCCGTGGGTGACACAGGCAACCTGACAAAGGCCCCCCAGGAAAGACCCCGGGGGCATCGGGGGGGTGTGGCGGGGGCATGGGGGGTGGATTTCGCCCTATTGCCCTGTTT                             | 8  |
| AG876-0-120       | 172765  | AGAATTTGTCTTCTATTACCCTTACTTTCTTCTTGGCCGTTCTTCTTCTAGTAGAATCCAGTATGCTGCTGTAAATGTTGCGCCCTACCTGTTGGCTGGCGGCTATTGC                                | 4  |
| AG876-5760-5880   | 345530  | CCCTCTCAGAAACTCTGACGGAGAAGCTGGAGCTGAACCTTCCCGCCCCCGGACCTGTGTGCTATTACAAACACTACAATAAACCCAATGTGCAAATGTGGTTTTGATGGCTACTTTGTTCTTAAAAAATGCAACAATAG | 4  |
| AG876-5790-5910   | 518295  | TGGACGTGAACCTTCCCCCCCCCGGACCTGTGTGCTGATTTACAAACACTACAATAAACCCAATGTGCAAATGTGGTTTTGATGGCTACTTTGTTCTTAAAAAATGCAACAATAG                          | 4  |
| AG876-5820-5940   | 691060  | TGTGTCTGATTTACAAACACTACAATAAACCCAATGTGCAAATGTGGTTTTGATGGCTACTTTGTTCTTAAAAAATGCAACAATAGAAAGTGGAAACCCCTCAGTCACGGGACATTAA                       | 4  |
| AG876-7500-7620   | 863825  | CCCGGATATAGATTAGGATAGCATATACTACCCAAATAGAGATTAGGATAGCATATGCTACCCAAATAGAGATTAGGATAGCATATGCTACCCGGATATAGATTAGGATAGCATATACTA                     | 4  |
| AG876-7530-7650   | 1036590 | CCCAAATAGAGATTAGGATAGCATATGCTACCCAAATAGAGATTAGGATAGCATATGCTACCCGGATATAGATTAGGATAGCATATACTACCCAAATAGAGATTAGGATAGCATATGCTA                     | 4  |
| AG876-7560-7680   | 1209355 | CCCAAATAGAGATTAGGATAGCATATGCTACCCGGATATAGATTAGGATAGCATATACTACCCAAATAGAGATTAGGATAGCATATGCTACCCAAATAGAGATTAGGATAGCATATGCTA                     | 4  |
| AG876-7590-7710   | 1382120 | CCCGGATATAGATTAGGATAGCATATACTACCCAAATAGAGATTAGGATAGCATATGCTACCCAAATAGAGATTAGGATAGCATATGCTACCCGGATATAGATTAGGATAGCATATGCTA                     | 4  |
| AG876-7620-7740   | 1554885 | CCCAAATAGAGATTAGGATAGCATATGCTACCCAAATAGAGATTAGGATAGCATATGCTACCCGGATATAGATTAGGATAGCATATGCTACCCAAATAGAGATTGGGATAGCATATGCTA                     | 4  |
| AG876-7650-7770   | 1727650 | CCCAAATAGAGATTAGGATAGCATATGCTACCCGGATATAGATTAGGATAGCATATGCTACCCAAATAGAGATTGGGATAGCATATGCTACCCGGATATAGATTAGGATAGCATATGCTA                     | 4  |
| AG876-7680-7800   | 1900415 | CCCGGATATAGATTAGGATAGCATATGCTACCCAAATAGAGATTGGGATAGCATATGCTACCCGGATATAGATTAGGATAGCATATGCTACCCAAATAGAGATTAGGATAGCATATGCTA                     | 4  |
| AG876-7710-7830   | 2073180 | CCCAAATAGAGATTGGGATAGCATATGCTACCCGGATATAGATTAGGATAGCATATGCTACCCAAATAGAGATTAGGATAGCATATGCTACCCGGATATAGATTAGGATAGCATATGCTA                     | 4  |
| AG876-7740-7860   | 2245945 | CCCGGATATAGATTAGGATAGCATATGCTACCCAAATAGAGATTAGGATAGCATATGCTACCCGGATATAGATTAGGATAGCATATGCTACCCAAATAGAGATTGGGATAGCATATGCTA                     | 4  |
| AG876-7770-7890   | 2418710 | CCCAAATAGAGATTAGGATAGCATATGCTACCCGGATATAGATTAGGATAGCATATGCTACCCAAATAGAGATTGGGATAGCATATGCTATCCTAATCTCTATCTGGGTAGCATATACTA                     | 4  |
| AG876-7800-7920   | 2591475 | CCCGGATATAGATTAGGATAGCATATGCTACCCAAATAGAGATTGGGATAGCATATGCTATCCTAATCTCTATCTGGGTAGCATATACTATCCTAATCTCTATATGGGTAGCATATGCTA                     | 4  |
| AG876-7830-7950   | 2764240 | CCCAAATAGAGATTGGGATAGCATATGCTATCCTAATCTCTATCTGGGTAGCATATACTATCCTAATCTCTATATGGGTAGCATATGCTATCCTAATCTCTATATCTGGGTAGCATATACTA                   | 4  |
| AG876-7860-7980   | 2937005 | TCCTAATCTCTATCTGGGTAGCATATACTATCCTAATCTCTATATGGGTAGCATATGCTATCCTAATCTCTATATCTGGGTAGCATATACTATCCTAATCTCTATATGGGTAGCATATGCTA                   | 4  |
| AG876-7890-8010   | 3109770 | TCCTAATCTCTATATGGGTAGCATATGCTATCCTAATCTCTATATCTGGGTAGCATATACTATCCTAATCTCTATATGGGTAGCATATGCTATCCTAATCTCTATATCTGGGTAGCATATGCTA                 | 4  |
| AG876-7920-8040   | 3282535 | TCCTAATCTCTATCTGGGTAGCATATACTATCCTAATCTCTATATGGGTAGCATATGCTATCCTAATCTCTATATCTGGGTAGCATATGCTATCCTAATCTCTATATGGGTAGCATATGCTA                   | 4  |
| AG876-7950-8070   | 3455300 | TCCTAATCTCTATATGGGTAGCATATGCTATCCTAATCTCTATATCTGGGTAGCATATGCTATCCTAATCTCTATATGGGTAGCATATGCTATCCTAATCTCTATATGGGTAGCATATGCTA                   | 4  |
| AG876-7980-8100   | 3628065 | TCCTAATCTCTATCTGGGTAGCATATGCTATCCTAATCTCTATATGGGTAGCATATGCTATCCTAATCTCTATATGGGTAGCATATGCTATCCTAATCTCTATATGGGTAGCATATGCTA                     | 4  |
| AG876-8010-8130   | 3800830 | TCCATCGCAACATTAGCCACCCTGCTCTCAACGACCTCGTGAATATGAGGACCAACAACCCCTGTGCTTGGCGCTCAGGCGCAAGTGTGTAACTTGTCTTCCAGATCGCAGCAATCGC                       | 4  |
| AG876-10140-10260 | 3973595 | AGAAGCATACATGACAATTAAGCGCGGTGATAATCCATACCCTGGGAAGCAGGAGATGGGTGCAATTCACCCGCAACCCCTTTCAGCTGTCAATTAACAATAAATGAAACCTTTAT                         | 4  |
| AG876-10170-10290 | 4146360 | ATAATCCATACCTGGAAGCAGGAGATGGGTGCATTTACCCCAACCCCTTTTCAGCTGTCAATTAACAATAAATGAAACCTTTTATTCTTGATTGCCCTTGTGTTCTTGGCCCTT                           | 4  |
| AG876-14040-14160 | 4319125 | AAATCAAACCTTTAGAGCGCAATGGCGCCATTTTGTCCACCGCGCAGATAATGGCGACCTAGGCTAAAACCCCGAGGAGCGGGTCTATGGTTGGCTCGCTGCTGCTATCTTTAG                           | 4  |
| AG876-14460-14580 | 4491890 | TTTTTCCCTTCCCTCCCTCGTCTTCCCGCTGCGCCTGGGGCCACCTTCATCACCGTCTGACTCCGCCATCCAAAGGCTAGGGGAGACCGAAGTGAAGTCCCTGGACCAGCCCGGCCCCG                      | 8  |
| AG876-15060-15180 | 4664655 | CACATGTCAGACGCTGGGCTCAAGGCCCTCGGGTCCCCCTGGAGCCCGGCTCAGCAACCCCTGCTGCTCCCTCTGCCACCCAGCCCTCCCGCTCCCGCTCCCGCTCCGCTC                              | 8  |
| AG876-15870-15990 | 4837420 | CCCTCTCTGTCTTCAGAGCAACAGGACCTCGGGACCCCGGAGCCCGCTCGGGGCGGCTCCAGCCCGCTGCTGGTCTCCGCTCCCGCTGAGCCCGCTTAAACCCAAAGAAATG                             | 8  |
| AG876-15900-16020 | 5010185 | GACCTCGGGCACCCAGGCCCCCTCGGGCCCGCTCCAGCGCCCTCCTGGTCTCCGCTCCCTCTGAGCCCGTTAAACCCAAAGAAATGCTGAGGGAGACCACTCCGGGGCCAGGC                            | 8  |
| AG876-16200-16320 | 5182950 | AGCCTCTCCCTCGCGGAGAGGGCCCTTCCGAGCCCTCAAGTCCAGTCCCACCGAGACCCGAGTGGCCCGGATCCCCACCGGCCCTTCTTTCCCGCTACTCTCTCAACCTTCGCT                           | 8  |
| AG876-16260-16380 | 5355715 | GAGTGGCCGGATCCCCACCGGCCCTTCTTTCCCGCTACTCTCTCAACCTTGTCTCCACCTAGACCCAGCTTCTGGCTCCCGGGTCCACCAGGCCAGCCGGAGGACCCCG                                | 8  |

|                   |          |                                                                                                                       |    |
|-------------------|----------|-----------------------------------------------------------------------------------------------------------------------|----|
| AG876-16410-16530 | 5528480  | CTGGCCTCTCCTTCCCGCTCCACCCGAGCCCTCAGCTTGCCTCCACCGGGTCCATCAGCCGCGCGGAGGACCCCGCGGCCGGTGTACAGTTCCCCCTGCAGCCGCCAGTC        | 12 |
| AG876-16560-16680 | 5701245  | TCCCCCAGCCTGAGGCCAGGCTCCTGTGACTGTCTGTAAGTCCAGCCTCCACGCGCGTCCACGGCTCCAGGCCAGCCCGTCCACCCCTCCACAGTTGGACAGGCCCTGTGT       | 8  |
| AG876-16590-16710 | 5874010  | CACTGTCTGTAAGTCCAGCCTCCACGCGCCGTCCACGGCTCCAGGCCAGCCCGTCCACCCCTCCACAGTTGGACAGGCCCTGTGCCACCCGGCCATCCCCCCCCCTGTGTC       | 8  |
| AG876-16770-16890 | 6046775  | CCCATGTAAAGCTGCCTCGAGTAGTGCCTCCAGAGCCCTTTTGCCCCCTGGCGGCCAGCCGACCCCGGGCGCCCCAAACTTTGTCCAGATGTCCAGGGGTCCCCGAGGGCGAG     | 8  |
| AG876-16800-16920 | 6219540  | CCAGAGCCCTTTTGCCCCCTGGCGGCCAGCCGACCCCGGGCGCCCCAAACTTTGTCCAGATGTCCAGGGGTCCCGAGGGCGAGGCCAGCCCTCCCGCCCTGTCCACTGAC        | 8  |
| AG876-16830-16950 | 6392305  | AGCCCGACCCCGGGCGCCCCAACTTTGTCCAGATGTCCAGGGTCCCGAGGGCGAGGCCACCCCTCCCGCCCTGTCCACTGCCCGTCCCGCAGAGCCCAAAAGTCCAGAGT        | 8  |
| AG876-16860-16980 | 6565070  | TCCAGATGTCCAGGGTCCCGAGGGCGAGCCAGCCAGCCCGTCCCGCCCTGTCCACTGGCCCGTCCCGCAGAAAGTCCAGAGTCCCGCCATGAGGCCATGCGCCCTGTACCAG      | 8  |
| AG876-16890-17010 | 6737835  | GCCCAGCCCTCCCGCCCTGTCCACTGCCCGGTCCCGCAGAAGCCCAAAAGTAGAGGCTCAGGCCATGCGCGCCCTGTACCAGGCCGCAAGAGCCAGATCTAAGGCCGGG         | 8  |
| AG876-17790-17910 | 7083365  | CCAGTCTACCAGAGGGGCCAAGAACCAGACGAGTCCGTAGAAGGGTCTCGTCCAGCAAGAAGAGGAGGTGGTAAGCGGTTACCTTCAGGGGTAAAGTAACTGACCTCCAGGGC     | 4  |
| AG876-17820-17940 | 7256130  | GACGAGTCCGTAGAAGGGTCTCGTCCAGCAAGAAGAGGAGGTGGTAAGCGGTTACCTTCAGGGTAAAGTAACTGACCTCCAGGGTACATAAAGGGAGGCTTAGTATACATGCT     | 4  |
| AG876-19020-19140 | 7428895  | GTCTCCGCTCCCTGTGAGCCCGTTAAACCCAAAGAATGTCTGAGGGAGCCACCTCGGGCCAGCCCGCCAGGTCAGAGGTCAGGGGACCTCAGGGTGCCTCCCGGGTCCAG        | 8  |
| AG876-19290-19410 | 7601660  | GGCCCTTCCAGGCCCTAAGTCCAGGCTCCACCCAGACCCGAGTGGCCCGATCCCGCCGATCCCGCCCGTCCCTCCCTACTCCTCTCCAACCTTCGCTCCACCTAGACCCCAAGCTTC | 8  |
| AG876-19320-19440 | 7774425  | ACCGAGACCCGAGTGGCCCGATCCCGACCGGCCCTCTCTTCCCGTACTCCTCTCCAACCTTCGCTCCACCTAGACCCAGCTTCTGCGCTCCCGGGTCCACAGGCCAGCCGG       | 8  |
| AG876-19800-19920 | 7947190  | GGGACTTATGTGACCTTGGGCTGGCTCCCATAGACTCCATGTAAGCTGCCTCGAGTAGGTGCCTCCAGAGCCCTTTTGCCCCCTGGCGGCCAGCCGACCCCGGGCGGCC         | 8  |
| AG876-19830-19950 | 8119955  | CCCATAGACTCCCATGTAAGCTGCCTCGAGTAGGTGCCTCCAGAGCCCTTTTGCCCCCTGGCGGCCAGCCGACCCCGGGCGCCCCAAACTTTGTCCAGATGTCCAGGGGTCC      | 8  |
| AG876-20700-20820 | 8292720  | CCTGGACCCAGCCCGCCCGGGCCCGGATCGGGCCAGAGTAAAGTGGACTTAAATTTTCTGCTAAGCCAACTCCACCACACCCAGGCACACTACACACCCACCCCGTCT          | 4  |
| AG876-21480-21600 | 8638250  | GAGGCCCGCGCCATTGGGCCAGATTGAGAGACCACTCCAGGGCCGAGGTTGGAGCCAGCGGGCACCCGAGGTCCAGACCCCGTCCCTCCCGGGGCGAGACAGGCCAGGGCCCC     | 8  |
| AG876-21510-21630 | 8811015  | AGACCAAGTCCAGGGGCCGAGGTTGGAGCCAGCGGGACCCGAGGTCCAGACCCCGTCCCTCCCGGGGCGAGACAGCCAGGGCCCGGGCAGCTGGCCCGAGGAGCGCCCGGA       | 12 |
| AG876-22110-22230 | 8983780  | CCCGTAAACCCAAAGAATGTCTGAGGGGAGCCACCTCGGGCCAGGCCAGAGTCCAGAGGTCAGGGGACCTCAGGGTGCCTCCCGGGTCCAGGCCAGCCGAGGGACCCGG         | 8  |
| AG876-22140-22260 | 9156545  | GCCACCTCGGGGCCAGGCCCAAGTCCAGAGGTCCAGGGCACCTCAGGGTGCCTCCCGGGTCCAGGCCAGCCGAGGGACCCCGGCAGCCCGGGCGGCCAGAGCCGGTTCCT        | 12 |
| AG876-22170-22290 | 9329310  | AGAGGTCAGGGGACCTCAGGGTGCCTCCCGGGTCCAGGCCAGCCGAGGGACCCCGGCGAGCCCGGGCGGCCAGAGCCGGTTCCTCGCCCTTCCCGGGTCCAGAGCCAGGG        | 12 |
| AG876-22200-22320 | 9502075  | CGGGTCCAGGCCAGCCGAGGGACCCGAGCCCGGGCGGCCAGAGGCCGTTCTCGCCCTTCCCGGGTCCAGAGCCAGGGTCCCGCCAGAAGGGACCTTAGCGTCC               | 12 |
| AG876-22230-22350 | 9674840  | CAGCCCGGGCGGCCAGAGGCCGTTCTCGCCCTTCCCGGGTCCAGAGCCAGGGTGTCCCGCAGAAGGACCCTAGCGTCCCTTCTCCCTCCAGGCCAGCCTCTCCC              | 8  |
| AG876-22380-22500 | 9847605  | GTCCAGTCCACCCAGACCCGAGTGGCCCGATCCCGACCGCCCTCTCTTCCCGTACTCCTCTCCAACCTTCGCTCCACCTAGACCCAGCTTCTGGCTCCCGGGTCCACCA         | 8  |
| AG876-22410-22530 | 10020370 | GATCCCCACCGGCCCTTCTCTTCCCGTACTCCTCTCCAACCTTCGCTCCACCTAGACCCAGCTTCTGGCTCCCGGGTCCACAGGCCAGCCGAGGGGACCCCGGCAGCCCGGG      | 8  |
| AG876-22440-22560 | 10193135 | ACTCCTTCCAACCTTCGCTCCACCTAGACCCAGCTTCTGGCTCCCGGGTCCACCCAGGCCAGCCGAGGGACCCCGGCAGCCCGGGCGAGTGCCTTCCCTTCCCTGGCCTCTC      | 8  |
| AG876-22890-23010 | 10365900 | GGCCTGGCTCCCATAGACTCCATGTAAGCTGCCTCGAGTAGGTGCCTCCAGAGCTTTTGCCCCCTGGCGGCCAGCCCGACCCCGGGCGCCCAACTTTGTCCAGATGT           | 8  |
| AG876-23310-23430 | 10538665 | CCTAGCCATAAACCCCGAGGACCCGAGCCCGGGCGGCCAGAGGCCGTTCTCGCCCTTCCCGGGTCCAGAGCCAGGGTAAAGGAAATAAGCCCGCAGACAGGGGAGTGGGCTTGT    | 4  |
| AG876-23670-23790 | 10711430 | TTTTTCCCTTCCCTCCCTCGCTTGGCTGCGCCTGGGGCCACCTTCATCACCCTCGCTGACTCCGCCATCCAAGCCTAGGGGAGCCGAAGTGAAGTCCCTGGACCAGCCCGGCCGG   | 8  |
| AG876-24330-24450 | 10884195 | CAACCCTGCTGCTCCCTCCTGCCACCCAGCCTCCCGCCCTCCCGTCCCGCTTCTGCTTATCCTCCCGGGTCCCGAGTAGGGCCGCTGCCCGCTGCACCCAGTACCTGCCCT       | 8  |
| AG876-24870-24990 | 11056960 | GCAGAGTCCGGGCGATCCTGTGAGACCTCCGGGCCCGGACGGCCCGCTCGGCCCCAGACAGACCCAGGGTCTCCAGGCAGGGTCCGGCATCTCCAGGGGAGCAGGCTCACCACC    | 8  |
| AG876-25830-25950 | 11229725 | CGTCCAGGCTCCAGGCCAGCCCGTCCACCCCTCCCGCAGTTGGACAGCCCTGTGCCACCCGAGTCCCGTCCAGGGGACCTTATGTACCCCTAGCTCCCATAGACT             | 8  |
| AG876-25860-25980 | 11402490 | ACCCCTCCCGCAGTTGGACAGGCCCTGTGCCACCCGGGCCATCCCGCCCGCTGTGCCACCCAGTCCCGTCCAGGGGAGCTTATGTACCCCTTGGGCTGGCTCCCATAGACT       | 8  |
| AG876-26070-26190 | 11575255 | TCCAGATGTCCAGGGTCCCGAGGGCGAGGCCAGCCCTCCCGCCCTGTCCACTGCCCGGTCCCGCCAGAAAGCCCAAAAGTAGAGGCTCAGGCCATGCGCGCCTGTACCAG        | 8  |
| AG876-27000-27120 | 11748020 | CCAGTCTACCAGAGGGGCCAAGAACCAGACGAGTCCGTAGAAGGGTCTCGTCCAGCAAGAAGAGGAGGTGGTAAGCGGTTACCTTCAGGGGTAAAGTAACTGACCTCCAGGGC     | 4  |
| AG876-28110-28230 | 12093550 | CCGGGCGCTCCTCGAGGCCAGCCCGGGTGGTTCGCCCCTCTCTGTCTTCCAGGAACCCAGGACCTCGGGCACCCAGAGCCCTCGGGCCCGCTCCAGGCCCTCCTG             | 8  |
| AG876-29160-29280 | 12266315 | CGAGGGCGAGGCCAGCCCTCCCGCCCTGTCCACTGCCCGGTCCCGCAGAAGCCCAAAAGTAGAGGCTCAGGCCATGCGCGCCTGTACCAGGCTGCCAAAGAGCCAGATC         | 8  |
| AG876-29490-29610 | 12439080 | TGCGCTGCTGCTATCTTTAGAGGGGAAAAGAGGAATAAGCCCGCAGACAGGGGAGTGGGCTGTTGTGACTTACCAAAGGTCCAGGGCCAAAGGGGTTGCGGTTGCTAGGCCACTTC  | 4  |
| AG876-30390-30510 | 12611845 | TTTTAGAACCACAGCCTGGACACATGTGCCAGACGCTGGGCTCTAAGGCCCTCGGGTCCCGCTGGACCCCGGCTCAGCAACCTGCTGCTCCCTCCTGCCACCCAGCCTCCCGCC    | 8  |
| AG876-30420-30540 | 12784610 | AGACGCTGGGCTCTAAGGCCCTCGGGTCCCGTGGACCCCGGCTCAGCAACCTGCTGCTCCCTCCTGCCACCCAGCCTCCCGCTCCCGTCCCGCTTCTGCTCTTATCCTCC        | 8  |
| AG876-30450-30570 | 12957375 | CCCCTGACCCCGGCTCAGCAACCTGCTGCTCCCTCCTGCCACCCAGCCTCCCGCCCTCCCGTCCCGCTTCTGCTTATCCTCCCGGGTCCCGAGTAGGGCCGCTGCCCGCC        | 12 |
| AG876-30480-30600 | 13130140 | GCTCCCTCCTGCCACCCAGCCTCCCGCCCTCCCGTCCCGCTTCTGCTTATCCTCCCGGGTCCCGAGTAGGGCCGCTGCCCGCTGCACCCAGTACCTGCCCTTGGCCAGC         | 8  |
| AG876-30900-31020 | 13302905 | GCTGTCTCAGGAGGGGCTGGCTCCCGGGTGGCCCTGGGGTAAAGTCCGGAGGCAGAGGGACCGGCTAGCCCGGGGAGTGGAGGGGATCGCCGGGTCTGTGGCAGAGTCCG        | 8  |
| AG876-32610-32730 | 13475670 | GGGAGTGGGCTTGTGTGACTTACCAAAGGTCCAGGGCCAAAGGGGTTGCGGTTGCTAGGCCACCTTCTCAGTCCAGCGGTTTACGTAAGCCAGACAGCAAGTGTGACTTCT       | 4  |
| AG876-32640-32760 | 13648435 | GGTCCAGGGCCAAAGGGGTTGCGGTTGCTAGGCCACCTTCTCAGTCCAGCGGTTTACGTAAGCCAGACAGCAAGTGTGACTTCTAGGGAGGGGACCACTGCCCTGGTATAAAG     | 4  |
| AG876-32850-32970 | 13821200 | CCCTCAAAGACTCGGGCCAGTTTCTAACTTTTCCCGTCCCGTCCCTGCTTGGCCCTGCGCCTGGGGCCACTTCATCACCCTGCTGACTCCGCCATCCAAGCTAGGGGAGACCC     | 4  |
| AG876-32880-33000 | 13993965 | TTTTTCCCTTCCCTCCCTGCTTGGCTGCGCCTGGGGCCACTTCATCACCCTGCTGACTCCGCCATCCAAGCTAGGGGAGACCCGAAGTGAAGTGGACCCAGCCCGGCCGG        | 8  |
| AG876-32940-33060 | 14166730 | GACTCCGCATCCAAGCTAGGGGAGACCGAAGTGAAGTCCCTGAGCCCGGGCGGCCCGCCGATCGGGCCAGAGGTAAGTGGACTTAAATTTTCTGCTAAGCCCAACT            | 8  |
| AG876-33690-33810 | 14339495 | TAGACCCGCCAAAGCCCATCCCTGAAGACCCAGCCGACCTTCTCTGTGTAACAGACAGAGAAGAAGTAGAGGCCCGGCCATTGGGCCAGATTGAGAGACCAAGTCCAGGGGCCGA   | 4  |
| AG876-34200-34320 | 14685025 | ACAGGCCCCAGACCCGGTCTCGGCCAGCCGAGCCAGCCGCGCCCGCCGGCGCCCTCCTCGAGCCAGCCCGGGGTTGGTCTGCCCTCTCTGTCTTCCAGGAACCAAGG           | 8  |
| AG876-34230-34350 | 14857790 | CCGAGCCGACCGCCCGCGCGGGCGCCTCCTCGAGCCAGCCCGGGGTTGGTCTGCCCTCTCTGTCTTCCAGAGAACAGGGACCTCGGGACCCAGAGCCCTCGGGCC             | 12 |

|                   |          |                                                                                                                           |   |
|-------------------|----------|---------------------------------------------------------------------------------------------------------------------------|---|
| AG876-34260-34380 | 15030555 | CCTCGGAGCCAGCCCCGGGGTTGGTCTGCCCTCTCTGTCTTACAGAGAACCCAGGACTCGGGCACCCAGAGCCCTCGGGCCCGCTCCAGGCGCCCTCTGGTCTCCGCTC             | 8 |
| AG876-35490-35610 | 15203320 | TTTAGCCCCAGCCCGCCTCTATAAGTTCTAGGCCAAACCTCCAATCACCAGCCACCTTCCAATGTAGTCTCTAGAGAGTGGCTGCTACGCATTAGCGAGAGATTTGACCCACACCCAGT   | 4 |
| AG876-35520-35640 | 15376085 | AGGCAAACCTCCAATCACCAGCCACCTTCCAATGTAGTCTCTAGAGAGTGGCTGCTACGCATTAGCGAGAGATTTGACCCACACCCAGTAGCCACCCGACGCCAATCTGTCTACATAGA   | 4 |
| AG876-35550-35670 | 15548850 | AATGTAGTCTCTTAGAGAGTGGCTGCTACGCATTAGCGAGAGATTTGACCCACACCCAGTAGCCACCCGACGCCAATCTGTCTACATAGAAGAAGAAGAGGATGAAGACTAAGTCAACAGG | 4 |
| AG876-35580-35700 | 15721615 | CATTAGCGAGAGATTTGACCCACACCCAGTAGGACCCCGACGCCAATCTGTCTACATAGAAGAAGAAGAGGATGAAGACTAAGTCAACAGGCTTAGCCAGGTGATTTGTGAATTTCAAGTT | 4 |
| AG876-35610-35730 | 15894380 | AGCCACCCGACGCCAATCTGTCTACATAGAAGAAGAAGAGGATGAAGACTAAGTCAACAGGCTTAGCCAGGTGATTTGTGAATTTCAATTTACTTTTCCAATCAAGCTTTCCAG        | 4 |
| AG876-35760-35880 | 16067145 | TTCCATGGGGACCTAGTATCCGTTTCTATTAGATAAAGTCTGCAAGATACTAAATTAACCAAGGTGACGCCAAGTGAACGCGTGTATTGCCAGGCTGCCACCCCTAGGATTTCCCCAAA   | 4 |
| AG876-35790-35910 | 16239910 | AGATTAAGTCCGCAAGATACTAAAATTAACCAAGGTGACGCCAAGTGAACGCGTGTATTGCCAGGCTGCCACCCCTGAGGATTTCCCCAAAAATGGGCTGTAGTAGGGTCTCTACCCC    | 4 |
| AG876-35820-35940 | 16412675 | AAGGTGACGCCAAGTGAACGCGTGTATTGCCAGGCTGCCACCCCTGAGGATTTCCCCAAAAATGGGCTGTAGTAGGGTCTCTACCCCCTTTTAGGCCAGGTGTGTTATTTGTTGT       | 4 |
| AG876-35850-35970 | 16585440 | AGGCTGCCACCCCTGAGGATTTCCCCAAAAATGGGCTGTAGTAGGGTCTCTACCCCCTTTTAGGCCAGGTGTGTTATTTGTTGTGTAGTGTATGTAATGTGTTGCCGCCAGG          | 4 |
| AG876-35880-36000 | 16758205 | AATGGGCTGTAGTAGGGTCTCTACCCCCTTTAGGCCAGGTGTGTTATTTGTTGTGTAGTGTATGTAATGTGTTGCCGCCAGGTGCCAGTGTGTTGTAGATGTGCAGCCGCC           | 4 |
| AG876-35910-36030 | 16930970 | CTCTTTAGGCCAGGTGTGTTATTTGTTGTGTAGTGTATGTAATGTGTTGCCGCCAGGTGCCAGTGTGTTGTTGTAGATGTGCAGCCGCCCTTAATGGTAGGCTGCTTTAGGCGCCA      | 4 |
| AG876-35940-36060 | 17103735 | GTTAGTGTATGTAATGTGTTGCCGCCAGGTGCCAGCTGTTTGTAGATGTGCAGCCGCCCTAATGGTAGGCTGTCTTTAGGGCTGCCAGGTGCCGCAAACTAGGATTAATCACCTGT      | 4 |
| AG876-35970-36090 | 17276500 | TGGCAGCTTGTGTTGTAGATGTGCAGCCGCCCTAATGGTAGGCTGTCTTTAGGGCTGCCAGGTGCCGCAAACTAGGATTAATCACCTGTATCCCTTTCCCTCCACCCGAGTAACCTCAG   | 4 |
| AG876-36270-36390 | 17449265 | GAAACCCCTGACTCTCCGTAATTCACCAAGTCTTACCAGGAACAATATCAAATAATCCATAATTAACCTACAATAATCGTTGTGCGGGAAAAACACTGGGGCACCCGACCCGCCAAC     | 4 |
| AG876-36300-36420 | 17622030 | ATCCTTACCAGGAACAATATCAAATAATCCATAATTAACCTACAATAATCGTTGTGCGGGAAAAACACTGGGGCACCCGACCCGCCAACCAACCCCCCAACCCCTCCACCTCTCCAC     | 4 |
| AG876-36330-36450 | 17794795 | CATTAATTAACCTACAATAATCGTTGTGCGGGAAAAACACTGGGGCACCCGACCCGCCAACCAACCCCCCAACCCCTCCACCTCCACCTGCTGGACACAAGAGC                  | 4 |
| AG876-36390-36510 | 18140325 | CACCCCCCAACCCCTCCACCTCTCCACCTGAGCGCAGGGATGCTGGACACAAGAGCCCTTACCCTGATATGAATCCCTGGGCAAGTGAACGCACTCAAGGCCCTCTGGCATCTT        | 4 |
| AG876-36420-36540 | 18313090 | CTGAGCGCAGGGATGCTGGACACAAGAGCCCTTACCCTGATATGAATCCCTGGGCAAGTGAACGCACTCAAGGCCCTCTGGCATCTTCCATAAAGATGCTTTGCATGGCTCAATACC     | 4 |
| AG876-36450-36570 | 18485855 | CCTTACCCTGATATGAATCCCTGGGCAAGTGAACGCACTCAAGGCCCTCTGGCATCTTCCATAAAGATGCTTTGCATGGCTCAATACCTCTTAGAAACGCACGGGGCAACAAGGCC      | 4 |
| AG876-36480-36600 | 18658620 | GTGACGCCAGTCAAGGCCCTCTGGCATCTTCCATAAAGATGCTTTGCATGGCTCAATACCTCTTAGAAACGCACGGGGCAACAAGGCCCTTTAGGCCACTAGGACCAACAACAGCT      | 4 |
| AG876-36510-36630 | 18831385 | CCATAAAGATGCTTTGCATGGCTCAATACCTCTTAGAAACGCACGGGGCAACAAGGCCCTTTAGGCCACTAGGACCAACAACAGCTCTCAGGTCACCTTGGAACTCAACCTGTCC       | 4 |
| AG876-36540-36660 | 19004150 | TTCTTAGAAACGCACGGGGCAACAAGGCCCTTTAGGCCACTAGGACCAACAACAGCTCTCAGGTCACCTTGGAACTCAACCTGTCCACAACCCCTCGCCAGGAGCCACCCATCATT      | 4 |
| AG876-36570-36690 | 19176915 | TTCTTAGGCCACTAGGACCAACAACAGCTCTCAGGTCACCTTGGAACTCAACCTGTCCACAACCCCTCGCCAGGAGCCACCCATCATTGTTACAGAGTCCCGCCGCCCCCGATTCA      | 4 |
| AG876-36600-36720 | 19349680 | CTCAGGTCACCTTGGAACTCAACCTGTCCACAACCCCTCGCCAGGAGCCACCCATCATTGTTACAGAGTCCCGCCGCCCCCGATTACACCAAGTCCCATGCTAGCCTTAGGACATA      | 4 |
| AG876-36630-36750 | 19522445 | ACAACCCCTCGCCAGGAGCCACCCATCATTGTTACAGAGTCCCGCCGCCCCCGATTACACCAAGTCCCATGCTAGGACATACTCTCAACCCACACCCACCAAGGCCCTA             | 4 |
| AG876-36660-36780 | 19695210 | TGTTACAGAGTCCCGCCGCCCCCGATTACACCAAGTCCCATGCTAGGACATACTCTCAACCCACACCCACCAAGGCCCTACTCTCTCAACCCAGAATACCACTGATAA              | 4 |
| AG876-36690-36810 | 19867975 | CACCAAGTCCCATGCTAGCCTTAGGACATACTCTCAACCCACACCCACCAAGGCCCTACTCTCTCAACCCAGAATACCACTGATAAATACCAACAGGCACTAATCAACAGCCA         | 4 |
| AG876-36720-36840 | 20040740 | CTCTCAACCCACACCCACCAAGGCCCTACTCTCTCAACCCAGAATACCACTGATAAATACCAACAGGCATACTAATCAACCCAGCCACAACACCCACCCAGGCCACAAGGCTCA        | 4 |
| AG876-36750-36870 | 20213505 | CTCTCTCAACCCAGAATACCACTGATAAATACCAACAGGCATACTAATCAACCCAGCCACAACACCCACCCAGGCCACAAGGCTCACACTAGGGCATCAACTAAGTCTACCACCCG      | 4 |
| AG876-36780-36900 | 20386270 | TACCACCAAGGCATACTAATCAACCCAGCCACAACACCCACCCAGGCCACAAGGCTCACACTAGGGCATCAACTAAGTCTACCACCCGATCCTCCCCGATCAGAGCACCACCAT        | 4 |
| AG876-36810-36930 | 20559035 | CAACACCCACCCAGGCCACAAGGCTCACACTAGGGCATCAACTAAGTCTACCACCCGATCCTCCCCGATCAGAGCACCACATTGTAGTCTGATAGTACAGGACTCCCTCCAC          | 4 |
| AG876-36840-36960 | 20731800 | CACTAGGGCATCAACTAAGTCTACCACCCGATCCTCCCCGATCAGAGCACCACCATGTAGTCTGATAGTACAGGACTCCCTCCACCTCCACATCTTACAGACTTCTCTATGA          | 4 |
| AG876-36870-36990 | 20904565 | ATCCTCCCGCATCAGAGCACCACATTGTAGTCTGATAGTACAGGACTCCCTCCACCTCCACATCTTACAGACTTCTCTATGACATATCCCCGAACCATTTGCCGCCACCAG           | 4 |
| AG876-36900-37020 | 21077330 | GTAGTCTGATAGTACAGGACTCCCTCCACCTCCACATCTTACAGACTTCTCTATGACATATCCCCGAACCATTTGCCGCCACCAGCAGCACCAGCACCACCCCTCCAGGTGTCA        | 4 |
| AG876-36930-37050 | 21250095 | CTCCACATCTTACAGACTTCTCTATGACATATCCCCGAACCATTTGCCGCCACCAGCAGCACCAGCACCACCCCTCCAGGTGTCAATTTAGACCAACAAGCACTTCTCCAAC          | 4 |
| AG876-36960-37080 | 21422860 | CATTATCCCCGAACCATTTGCCGCCACCAGCAGCACCAGCACCACCCCTCCAGGTGTCAATTTAGACCAACAAGCACTTCTCCAACCTCCAGGCCACCATGGTGGCCACTGTCCGG      | 4 |
| AG876-36990-37110 | 21595625 | CAGCACCAGCACACCCCTCCAGGTGTCAATTTAGACCAACAAGCACTTCTCCAACCTCCAGGCCACCATGGTGGCCACTGTCCGCGACCCCAACCACTCAGACTCCACCAA           | 4 |
| AG876-37020-37140 | 21768390 | TTTATGACCAACAAGCACTTCTCCAACCTCCAGGCCACCATGGTGGCCACTGTCCGCGACCCACGCCAACCCTCAGACTCCACCAACAATAACGAAACAGGGCCCGGACAGGGCC       | 4 |
| AG876-37050-37170 | 21941155 | CAGGGCCACCATGGTGGCCACTGTCCGCGACCCACGCCAACCCTCAGACTCCACCAACAATAACGAAACAGGGCCCGGACAGGGCCAGGGAAGGGGCAGGTGGCGGGCAGGGGCA       | 8 |
| AG876-37080-37200 | 22113920 | ACCCACGCCAACCCTCAGACTCCACCAACAATAACGAAACAGGGCCCGGACAGGGCCAGGGGAAGGGGCAGGTGGCGGGCAGGGGCAGAAGCAAGGGCAGGGGCAGAAATGCACAAAC    | 4 |
| AG876-37110-37230 | 22286685 | CAAATACGAAACAGGGCCCGGACAGGGCCAGGGGAAGGGGCAGGTGGCGGGCAGGGGCAGAAGCAAGGGCAGGGGCAGAATGCACAACTTCTGAACCAGGAGACAGGGCCAGACA       | 4 |
| AG876-37140-37260 | 22459450 | AGGGGAAGGGCAGGTGGCGGGCAGGGGCAGAAGCAAGGGCAGGGGCAGAATGCACAACTTCTGAACCAGGAGACCCAGGGCCAGACACTCCAGTCTGATGCCTCAATTAAGT          | 4 |
| AG876-37170-37290 | 22632215 | GAAGCAAGGGCAGGGCAGAAATGCACAACTTCTGAACCACGGAGACCAGGGCCAGACTTCCAGTCTAGTATGCCTCAATTAAGTCCGGTGTGAGTCTTATCAGGGACAGGGGC         | 4 |
| AG876-37200-37320 | 22804980 | TTCTGAACCAGGAGACCAGGGCCAGACTTCCAGTCTAGTATGCCTCAATTAAGTCCGGTGTGAGTCTTATCAGGGACAGGGCCCTGAGAAGTCAACACCCCGGCCGCTA             | 4 |
| AG876-37230-37350 | 22977745 | CTCCAGTCTAGTATGCCTCAATTAAGTCCGGTGTGAGTCTTATCAGGGACAGGGGCCTGAGAAGTCAACACCCCGGCCGCTCAGGGCCGGCCCGTGTAGAGTGAACACTT            | 4 |
| AG876-37260-37380 | 23150510 | CGGTTGTAGTCTTATCAGGGACAGGGCCCTGAGAAGTCAACCAACCCCGGCCCTCAGGGCCGGCCCGTGTAGTGAACACTTCAACCAACCCCTGACATTTCAACCAATACAT          | 4 |
| AG876-37290-37410 | 23323275 | CTGAGAAGTCAACCAACCCCGGCCGCTCAGGGCCGGCCGCTGTAGAGTACACTTCAACCAACCCCTGACATTTCAACCAATACATGAACCAAGTCTCTGATAGTGAAGAAGACCC       | 4 |
| AG876-37320-37440 | 23496040 | CGGCGGCCCGTCTGTAGAGTACACTTTCAGCAACCCCTGACATTTCAACCAATACATGAACCAAGTCTCTGATAGTGAAGAAGACCCCTTCTTCTCCAGTGTATGGTATCCT          | 4 |
| AG876-37350-37470 | 23668805 | CAGCAACCCCTGACATTTCAACCAATACATGAACCAAGTCTCTGATAGTGAAGAAGACCCCTTCTTCTCCAGTGTATGGTATCCTCAACGTTAGAAGTGCAGAAATAGATGAAA        | 4 |
| AG876-37380-37500 | 23841570 | AACCAGAGTCTCTGATAGTGAAGAAGACCCCTTCTTCTCCAGTGTATGGTATCCTCAACGTTAGAAGTGCAGAAATAGATGAAGTGGGAGGGCATTGTTGAACAACAGAAT           | 4 |

|                   |          |                                                                                                                           |    |
|-------------------|----------|---------------------------------------------------------------------------------------------------------------------------|----|
| AG876-37410-37530 | 24014335 | CCTTTCTCTCCCCAGTGATTGGTATCCTCCAACGTAGAACCTGCAGAATTAGATGAAAGTTGGGAGGGCATTTTTGAACAACAAGAATCTCATAGCTCTGATGAAGAGAATGTAGGGG    | 4  |
| AG876-37440-37560 | 24187100 | CAACGTTAGAACCCTGCAGAATTAGATGAAAGTTGGGAGGGCATTTTTGAACAACAAGAATCTCATAGCTCTGATGAAGAGAATGTAGGGGGGGCTAGTAAAAGACCTCGCACCTCCACTC | 4  |
| AG876-37470-37590 | 24359865 | GTTGGGAGGGCATTTTTGAACAACAAGAATCTCATAGCTCTGATGAAGAGAATGTAGGGGGGGCCTAGTAAAAGACCTCGCACCTCCACTCAGTAAAAGACCTTACTCTCCAGTAATCA   | 4  |
| AG876-37500-37620 | 24532630 | CTCATAGCTCTGATGAAGAGAATGTAGGGGGGCCTAGTAAAAGACCTCGCACCTCCACTCAGTAAAAGACCTTACTCTCCAGTAAATCAATGTATCCAAATAAATGTTAATGATTTTG    | 4  |
| AG876-37530-37650 | 24705395 | GGCCTAGTAAAAGACCTCGCACCTCCACTCAGTAAAAGACCTTACTCTCCAGTAAATCAATGTATCCAAATAAATGTTAATGATTTTGTCTTAACATATTGACCCGCTGTCACTTA      | 4  |
| AG876-37560-37680 | 24878160 | AGTAAAAGACCTTACTCTCCAGTAAATCAATGTATCCAAATAAATGTTAATGATTTTGTCTTAACATATTGACCCGCTGTCACTTATAAATAACAGGGAAGCTATGTTTAGCT         | 4  |
| AG876-37590-37710 | 25050925 | ATGTATCCAAATAAATGTTAATGATTTTGTCTTAACATATTGACCCGCTGTCACTTATAAATAACAGGGAAGCTATGTTTAGCTATTCCACCAACTGCACCAATGCCAGCAGCC        | 4  |
| AG876-37620-37740 | 25223690 | TTCTTAACATATTGACCCGCTGTCACTTATAAATAACAGGGAAGCTATGTTTAGCTATTCCACCAACTGCACCAATGGACAGCCAAAATTGGTGCCTTGCTCACAGCTCTTTTT        | 4  |
| AG876-37650-37770 | 25396455 | TTAATAACAGGGAAGCTATGTTTAGCTATTCCACCAACTGCACCAATGGACAGCCAAAATTGGTGCCTTGCTCACAGCTCTTTTTGCCAGTGGCTTACAGCCAGTAGGCAGCTC        | 4  |
| AG876-37680-37800 | 25569220 | ATCCACCAACTGCACCAATGGACAGCCAAAATTGGTGCCTTGCTCACAGCTCTTTTTGCCAGTGGCTTACAGCCAGTAGGCAGCTCAGAAAAGTTAGCTATTCCACCAACCCGGC       | 4  |
| AG876-37710-37830 | 25741985 | AAAATTGGTGCCTTGCTCACAGCTCTTTTTGCCAGTGGCTTACAGCCAGTAGGCAGCTCAGAAAAGTTAGCTATTCCACCAACCCGGCCCAATGAATGCTTGCCAAAATTGGGSCCT     | 4  |
| AG876-37740-37860 | 25914750 | GCCAGTGGCTTACAGCCAGTAGGCAGCTCAGAAAAGTTAGCTATTCCACCAACCCGGCCCAATGAATGCTTGCCAAAATTGGGSCCTTGCTTCCAGCATTGCCAGCAGCTTATAG       | 4  |
| AG876-37770-37890 | 26087515 | AGAAAAGTTAGCTATTCCACCAACCCGGCCCAATGAATGCTTGCCAAAATTGGGSCCTTGCTTCCAGCATTGCCAGCAGCTTATAGCATGGTAGGCCGCTCAACTCGGCTGTCTT       | 4  |
| AG876-37800-37920 | 26260280 | CCCAATGAATGCTTGCCAAAATTGGGGCCTTGCTTCCAGCATTGCCAGCAGCTTATAGCATGGTAGGCCGCTCAACTCGGCTGTCTTACTGCCAGCTACTCTCCACTCCAGTCC        | 4  |
| AG876-37830-37950 | 26433045 | TGCTTCCAGCATTGCCAGCAGCTTATAGCATGGTAGGCCGCTCAACTCGGCTGTCTTACTGCCAGCAGCTACTCTCCACTCCAGTCCATGTTGCGACTCCTATGCATTCTCTCCCT      | 4  |
| AG876-38370-38490 | 26605810 | GGGTGGGGGTGGCCCGCTGGGCACCGCTGCGCCGCCAGGTCCAGGGGACGCGGGGTTCTGCGCTCCGGGGGACGCGGGCGCCGGTGGTCCGCTGGGCCGTGCCCC                 | 12 |
| AG876-38400-38520 | 26778575 | GCGCCGCCAGGTCCAGGGGACGCGGGGTTCTGCGCTCCGGGGGACGCGGGCGCCGGTGGTCCGCTGGGCCGTGCCCCGCTCCGGGTGGGGGTGGCCCGCTGGCC                  | 12 |
| AG876-38430-38550 | 26951340 | GTTCTGCGCTCCGGGGGACGCGGGGCGCCGGTGGTCCGCTGGGCCGTGCCCCGCTCCGGGTGGGGGTGGCCCGCTGGGCACCGCTGCGCCGCCAGGTCCCTGGGGCAG              | 12 |
| AG876-38760-38880 | 27124105 | CCGCTGGGCACCGCTGCGCCGCCAGGTCCGGGGACGCGGGTCTGCGCTCCGGGGGACGCGGGCGCCGGTGGTCCGCTGGGCCGTGCCCCGCTCCGGGTGGGGGG                  | 12 |
| AG876-38790-38910 | 27296870 | CCTGGGGACGCGGGGTTCTGCGCTCCGGGGGACGCGGGCGCCGGTGGTCCGCTGGGCCGTGCCCCGCTCCGGGTGGGGGTGGCCCGCTGGGCACCGCTGCGCCGCCCG              | 16 |
| AG876-38910-39030 | 27469635 | CAGTCCAGGGGACGCGGGGTTCTGCGCTCCGGGGGACGCGGGGCGCCGGTGGTCCGCTGGGCCGTGCCCCGCTCCGGGTGGGGGTGGCCCGCTGGGCACCGCTGCGCC              | 12 |
| AG876-39270-39390 | 27642400 | CCGCTGCGCCGCCAGGTCCAGGGGACGCGGGGTTCTGCGCTCCGGGGGACGCGGGCGCCGGTGGTCCGCTGGGCCGTGCCCCGCTCCGGGTGGGGGTGGCCCGCTGGCC             | 12 |
| AG876-39300-39420 | 27815165 | CCGGGTCTGCGCTCCGGGGGACGCGGGGCGCCGGTGGTCCGCTGGGCCGTGCCCCGCTCCGGGTGGGGGTGGCCCGCTGGGCACCGCTGCGCCGCCAGGTCTCTGG                | 12 |
| AG876-39510-39630 | 27987930 | CCGCTGGGCACCGCTGCGCCGCCAGGTCCGGGGACGCGGGTCTGCGCTCCGGGGGACGCGGGCGCCGGTGGTCCGCTGGGCCGTGCCCCGCTCCGGGTGGGGGG                  | 12 |
| AG876-39540-39660 | 28160695 | CCTGGGGACGCGGGGTTCTGCGCTCCGGGGGACGCGGGCGCCGGTGGTCCGCTGGGCCGTGCCCCGCTCCGGGTGGGGGTGGCCCGCTGGGCACCGCTGCGCCGCCCG              | 16 |
| AG876-39570-39690 | 28333460 | GGGGACGCGGGGCGCCCGGTGGTCCGCTGGGCCGTGCCCCGCTCCGGGTGGGGGTGGCCCGCTGGGCACCGCTGCGCCGCCAGGTCCAGGGGACGCGGGGTTCTGGCG              | 12 |
| AG876-39600-39720 | 28506225 | CTGGCCGCTGCCCGCTCCGGGTGGGGGTGGCCCGCTGGGCACCGCTGCGCCGCCAGGTCCAGGGGACGCGGGGTTCTGCGCTCCGGGGGACGCGGGCGCCGGTGGTGG              | 12 |
| AG876-39630-39750 | 28678990 | TGGCCCGCTGGGCACCGCTGCGCCGCCAGGTCCGGGGGACGCGGGGTTCTGCGCTCCGGGGGACGCGGGCGCCGGTGGTCCGCTGGGCCGTGCCCCGCTCCGGGTGGGGGTGGCC       | 12 |
| AG876-39660-39780 | 28851755 | CAGTCCAGGGGACGCGGGGTTCTGCGCTCCGGGGGACGCGGGGCGCCGGTGGTCCGCTGGGCCGTGCCCCGCTCCGGGTGGGGGTGGCCCGCTGGGCACCGCTGCGCC              | 12 |
| AG876-39690-39810 | 29024520 | CTCCGGGGGACGCGGGGCGCCCGGTGGTCCGCTGGGCCGTGCCCCGCTCCGGGTGGGGGTGGCCCGCTGGGCACCGCTGCGCCGCCAGGTCCCTGGGGACGCGGGG                | 12 |
| AG876-39810-39930 | 29197285 | TGGCCTCCGGGGGACGCGGGGCGCCCGGTGGTCCGCTGGGCCGTGCCCCGCTCCGGGTGGGGGTGGCCCGCTGGGCACCGCTGCGCCGCCAGGTCCCTGGGGACGCGGGG            | 16 |
| AG876-39840-39960 | 29370050 | GGTGGTCCGCTGGGCCGTGCCCGCTCCGGGTGGGGGTGGCCCGCTGGGCACCGCTGCGCCGCCAGGTCCAGGGGACGCGGGGTTCTGCGCTCCACTGCACCTGGAATGC             | 12 |
| AG876-78240-78360 | 29542815 | TTGGGGTAGTCACTGCTGGGTGGGGCTGGTGGCATTGGGGTTGGGGTAGTCACTGCTGAGGTGGGACTTGTTCCTCCAAAGTGGGGCTGGTGGCATTGGGGTTGGGGTAGTCACTG      | 4  |
| AG876-78270-78390 | 29715580 | TGGCATTGGGGTTGGGGTAGTCACTGCTGAGTGGGACTTGTTCCTCCAAAGTGGGGCTGGTGGCATTGGGGTTGGGGTAGTCACTGCTGGGGTGGGGCTGGTGGCATTGGGGTTG       | 4  |
| AG876-80040-80160 | 29888345 | CCGGGTCTCCCGCCCGGATGACAACATAGAAGAAGTACCATCTACCTCGGGTGTTCAGGAACGGGCGTCTGAGGGAGATTGGGAAAATGTCTCATAGAGATATCAGATAGCAGCTCA     | 4  |
| AG876-80070-80190 | 30061110 | GAAGAAGTACCATCTACCTCGGGTGTTCAGGAACGGGCGTCTGAGGGAGATTGGGAAAATGTCTCATAGAGATATCAGATAGCAGCTCAGAAGAGGAAGCAGAAGTCCACCTGGAG      | 4  |
| AG876-80100-80220 | 30233875 | GAACGGGCGTCTGAGGGAGATTGGGAAAATGTCTCATAGAGATATCAGATAGCAGCTCAGAAGAGGAAGCAGAAGTCCACCTGGAGCCATCCAGAGGGGTAAGAAAGAAAACGG        | 4  |
| AG876-80130-80250 | 30406640 | GTCCCTCATAGAGATATCAGATAGCAGCTCAGAAGAGGAAGCAGAAGATGCCACCTGGAGCCATCCAGAGGGGTAAGAAAGAAAACGGTTCATGATGATGCGGGTGGTTACGCTCA      | 4  |
| AG876-80160-80280 | 30579405 | GAAGAGGAAGCAGAAGATGCCACCTGGAGCCATCCAGAGGGGTAAGAAAGAAAACGGTTCGATGATGATGCGGGTGGTTACGCTCCAGCACAACAGTGCACCCCTCAGCTGGAT        | 4  |
| AG876-80190-80310 | 30752170 | CCATCCCAGAGGGGTAAGAAAGAAAACGGGTCGATGATGATGCGGGTGGTTACGCTCCAGCACAACAGTGCACCCCTCAGCTGGATCACCTGGTGGAGAAGCATTCTCTACAGG        | 4  |
| AG876-80220-80340 | 30924935 | GTCCATGATGATGCGGGTGGTTACGCTCCAGCACAACAGTGCACCCCTCAGCTGGATCACCTGGTTCAGAGGCAATCTCTACAGGTTCCGCTAGATTTAAGAAGGTTATTCAA         | 4  |
| AG876-80250-80370 | 31097700 | GCACAACAGTGCACCCCTCAGCTGGATCACCTGGTTCGAGAAGCCATTCTACAGGTTCCGCTAGATTTAAGAAGGTTATTCAAGCAATGGAGCCGACGCTACGGTGAGCTTC          | 4  |
| AG876-80280-80400 | 31270465 | CACCTGGTTCAGAGCCATTCTACAGTTCCGCTAGATTTAAGAAGGTTATTCAAGCAATGGAGCCGACGCTACGGTAGCTTCCCTATGGCCAGGTGTGATGATGTTT                | 4  |
| AG876-80310-80430 | 31443230 | TTTCCGCTAGATTTAAGAAGGTTATTCAAGCAATGGAGCCGACGCTACGGTGAGCTTCCCTATGGCCAGGTGTGATGATGTTTGGCCATCGCACAACAAGTAAAGTATTG            | 4  |
| AG876-80340-80460 | 31615995 | GCAATTGGAGCCGACGCTACGGTGAGCTTCCCTATGGCCAGGTGTGATGATGTTTGGCCATCGCACAACAAGTAAAGTATTGTTGCCGTTGGTTTTCAGCAGCCCGACAGCGG         | 4  |
| AG876-80370-80490 | 31788760 | CCTATGGCCAGGTGTGATGATGTTTGGCCATCGCACAACAAGTAAAGTATTGTTGCCGTTGGTTTACGACCCCGACAGCCAGGCATAGACCAGTTTTTCGGATCCAGAT             | 4  |
| AG876-80400-80520 | 31961525 | TGCCCATCGCACAACAAGTAAAGTATTGTTGCCGTTGGTTTACGACCCCGACAGCCATAGACCAGTTTTTCGGATCCAGATTTCAAATACCCAGCTGACGTAATGATGC             | 4  |
| AG876-80430-80550 | 32134290 | TGGCGTGGTTTCAGACCCCGACAGCCGACATAGCCAGTTTTTCGGATCCAGATTTCAAATACCCAGCTGACGTAATGATGATGATGTTTTCAGCAGCCAGCCATGAGATCGG          | 4  |
| AG876-80460-80580 | 32307055 | AGCCATAGACCAGTTTTTCGGATCCAGATTTCAAATACCCAGCTGACGTAATGATGTTTTCGGATCCAGATTTCAAATACCCAGCTGACGTAATGATGATGATGTTTTCAGCAGCCAG    | 4  |
| AG876-80580-80700 | 32479820 | GGTCAAATGGAGAATGACCACCTGGCCGCTGGTTGGCCTATGGGTTACAGGCATACAGTAGCTGGATGATGATGATGATGTTTGGCCATCGCACAACAAGTAAAGTATTGTTGCCG      | 4  |
| AG876-80610-80730 | 32652585 | TGGTTGGCCTATGGGTTACAGGCATACAGTAGCTGGATGTACAGCTACCCGATCCCGAGTACTGCCAGATCATACTGTCAGGCGACTTGGGTGCGCAAGTGGCCGTAGGTG           | 4  |

|                   |          |                                                                                                                                                                            |   |
|-------------------|----------|----------------------------------------------------------------------------------------------------------------------------------------------------------------------------|---|
| AG876-80640-80760 | 32825350 | TAGCTGGATGTACAGCTACACCGATCCCAGGTGACTGCCAGCATACATACCTGCAGGCGACTCTGGGTGCGCAAGTGGCCGTAGGTGTACATGTGACCTTTCTGCCGGCACCTTTAG                                                      | 4 |
| AG876-80670-80790 | 32998115 | GGTGA CTGCCACGATCATACTCTGCAGGCGACTCTGGGTGCGCAAGTGGCCGTAGGTGTACATGTGACCTTTCTGCCGGCACCTTTAGGCCGCCGCGATGTAGTCCCGGGATCGCCA                                                     | 4 |
| AG876-80700-80820 | 33170880 | GACTCTGGGTGCGCAAGTGGCCGTAGGTGTACATGTGACCTTTCTGCCGGCACCTTTAGGCCGCCGCGATGTAGTCCCGGGATCGCCAGTGGTGTATGTTCCAGAGCCCGTGGGTGA                                                      | 4 |
| AG876-80730-80850 | 33343645 | TCATTGTACCTTTCTGCCGGCACCTTTAGGCCGCCGCGATGTAGTCCCGGGATCGCCAGTGGTGTATGTTCCAGAGCCCGTGGGTGACCTTTGTGCAGAGTTCTAATCCATGCTACAG                                                     | 4 |
| AG876-80760-80880 | 33516410 | GCCCGCCGATGTAGTCCCGGGATCGCCAGTGGTGTATGTTCCAGAGCCCGGTGGGTGACCTTTGTGCAGAGTTCTAATCCATGCTACAGTATTTCTTTGACTACATGGCCATACATAG                                                     | 4 |
| AG876-80790-80910 | 33689175 | GTGGTTGTATGTTCCAGAGCCCGTGGGTGACCTTTGTGCAGAGTTCTAATCCATGCTACAGTATTTCTTTGACTACATGGCCATACATAGGAGCCCTCACAAAACTGGGATGAAGTGT                                                     | 4 |
| AG876-80820-80940 | 33861940 | CCTGTGCAGAGTTCTAATCCATGCTACAGTATTTCTTTGACTACATGGCCATACATAGGAGCCCTCACAAAACTGGGATGAAGTGGTAAACACCTGATCAGCGTGTACATTATGGA                                                       | 4 |
| AG876-80850-80970 | 34034705 | TATTTCTTTGACTACATGGCCATACATAGGAGCCCTCACAAAACTGGGATGAAGTGGTAAACACCTGATCAGCGTGTACATTATGGAATTCCTGGGCTTTTTCGCAACGACCGGAGTT                                                     | 4 |
| AG876-80880-81000 | 34207470 | GAGCCTCACAAAACTGGGATGAAGTGGTAAACACCTGATCAGCGTGTACATTATGGAATTCCTGGGCTTTTTCGCAACGACCGGAGTTGGTCTACATCAAGAGCTTTGTGAGCTATGC                                                     | 4 |
| AG876-80910-81030 | 34380235 | AACACCTGATCAGCGTGTACATTATGGAATTCCTGGGCTTTTTCGCAACGACCGGAGTTGGTCTACATCAAGAGCTTTGTGAGCTATGCCTTTGGGCACCTAGTATCGAAACACCGTG                                                     | 4 |
| AG876-80940-81060 | 34553000 | ATTCTGGGCTTTTTCGCAACGACCGGAGTTGGTCTACATCAAGAGCTTTGTGAGCTATGCCTTTGGGCACCTAGTATCGAAACACCGTGGATGGATGAGAATCCTAGCACAGACGACGGC                                                   | 4 |
| AG876-80970-81090 | 34725765 | GGTCTACATCAAGAGCTTTGTGAGCTATGCCTTTGGGCACCTAGTATCGAAACACCGGATGGATGGATGAGAATCCTAGCACAGACGACGGCCTGGAATTCCTCGTGTAGTGTCCAGGATGGA                                                | 4 |
| AG876-81000-81120 | 34898530 | CTTGGGCACCTAGTATCGAAACACCGTGGATGGATGAGAATCCTAGCACAGACGACGGCACAGGCTTGAATGCGGCTTGTCTCCGGGGCGTGCCTACGGGCAAGACTTGTCTAGAAC                                                      | 4 |
| AG876-81030-81150 | 35071295 | GATGGATGAGAATCCTAGCACAGACGACGGCACAGGCTTGAATGCGGCTTGTCTCCGGGGCGTGCCTACGGGCAAGACTTGTCTAGAATGGAAGGAGAATGCGGAGAGTGTACCTG                                                       | 4 |
| AG876-81060-81180 | 35244060 | ACAGGCTTGAATGCGGCTTGTCTCCGGGGCGTGCCTACGGGCAAGACTTGTCTAGAATGGAAGGAGAATGCGGCAAGTGTCTACCTGTGAAACACGGGAAGAAAGTGAAGACACAGA                                                      | 4 |
| AG876-81090-81210 | 35416825 | GCGTGCCTACGGGCAAGACTTGTCTAGAATGGAAGGAGAATGCGGCAAGTGTCTACCTGTGAAACACGGGAAGAAAGTGAAGACACAGAGAGCGATGGGGATGATGAAGAACTTCTCTG                                                    | 4 |
| AG876-81120-81240 | 35589590 | TGAAGGAGAACATGCGAAGTGTCTACCTGTGAAACACGGGAAGAAAGTGAAGACACAGAGAGCGATGGGGATGATGAAGAACTTCTCTGTGTAGTGTCCAGGATGGAACCTAAGCACAG                                                    | 4 |
| AG876-81150-81270 | 35762355 | TGAAACACGGGAAGAAAGTGAAGACACAGAGAGCGATGGGGATGATGAAGAACTTCTCTGTGTAGTGTCCAGGATGGAACCTAAGCACAGACGACCCCTATATTTTAAAGACCGCTGCA                                                    | 4 |
| AG876-81180-81300 | 35935120 | GAGCGATGGGGATGATGAAGAACTTCTCTGTGTAGTGTCCAGGGATGGAACCTAAGCACAGACGACCCCTATATTTTAAAGACCGCTGCACAGTGTCTGTTGATGAGAGCGGGCAAGG                                                     | 4 |
| AG876-81210-81330 | 36107885 | TGTAGTGTCCAGGATGGAACCTAAGCACAGACGACCCCTATATTTTAAAGACCGCTGCACAGTGTCTGTTGATGAGAGCGGGCAAGGAAAGAAAGACGGGCGAGGACACTGGCGAA                                                       | 4 |
| AG876-81240-81360 | 36280650 | ACGACCCCTATATTTTAAAGACCGCTGCACAGTGTCTGTTGATGAGAGCGGGCAAGGAAAGAAAGACGGGCGGAGACACTGGCGAAGGCCCTTAGGGCCTTATGGCACACCTAG                                                         | 4 |
| AG876-81270-81390 | 36453415 | CAGTTGCTGTGATGAGAGCGGGCAAGGAAAGGAAAGGACGGGCGAGGAGACACTGGCCAGGCTTATGGCACACTAGGCCCGCAGTTAGGCCCGCAGTTAGAACCAAGACCAAGGAT                                                       | 4 |
| AG876-81300-81420 | 36626180 | AAAGGAAACGGGCAAGGAGACACTGGCGAAGGCCCTTAGGCGCCTTATGGCACACTAGGCCCGCAGTTAGAACCAAGACCAAGGATCCTCGCAAGGCTATGAGACAGCTACCAAGTCA                                                     | 4 |
| AG876-81330-81450 | 36798945 | GGCCCTAGGCGCCTTATGGCACACTAGGCCCGCAGTTAGAACCAAGACCAAGGATCCTCGCAAGGCTATGAGACAGCTACCAAGTCAAGGATCCTCGCAAGGCTATGAGACAGCTACCAAGTCA                                               | 4 |
| AG876-81360-81480 | 36971710 | GCCGCGAGTTCAGAAACCAAGACCAAGGATCCTCGCAAGGCTATGAGACAGCTACCAAGTCAAGGATCCTCGCAAGGCTATGAGACAGCTACCAAGTCAAGGATCCTCGCAAGGCTATGAGACAGCTACCAAGTCA                                   | 4 |
| AG876-81390-81510 | 37144475 | CCCGCAAAGCTATGAGACAGCTACCAAGTCAAGGATCCTCGCAAGGCTATGAGACAGCTACCAAGTCAAGGATCCTCGCAAGGCTATGAGACAGCTACCAAGTCAAGGATCCTCGCAAGGCTATGAGACAGCTACCAAGTCA                             | 4 |
| AG876-81420-81540 | 37317240 | GCGGTCGGGCAAGTCCAGAACCCCAACCCCACTTACATCAGAACACACAGCATGGCCCGTGTATGGTAGCTCAGAACCCACGTGCACCTTAGGGGACCACTCCAGGTGT                                                              | 4 |
| AG876-81450-81570 | 37490005 | CACCCACCTTACATCAGCAACACACAGCATGGCCCGTGTATGGTAGCTCAGAACCCACGTGCACCTTAGGGGACCACTCCAGGTGTCTAAAGATGGACGAGGGGCGTGTGACCC                                                         | 4 |
| AG876-81480-81600 | 37662770 | GGCCCGTGTATGGTAGCTCAGAACCCACGTGCACCTTAGGGGACCACTCCAGGTGTCTAAAGATGGACGAGGGGCGTGTGACCCGTTACCCGCTGGCCGGGCTATTGTCCG                                                            | 4 |
| AG876-81510-81630 | 37835535 | TGCACCTTAGGGGACCACTCCAGGTGTCTAAAGATGGACGAGGGGCGTGTGACCCGTTACCCGCTGGCCGGGCTATTGTCCGCGCTGGGAGTGTACCTGTTACAGTCTCC                                                             | 4 |
| AG876-81540-81660 | 38008300 | TCCTAAAGATGGACGAGGGGCGTGTGACCCGTTACCCGCTGGCCGGGCTATTGTCCGCGCTGGGAGTGTACCTGTTACAGTCTCCGGGAAGGGCTTTGACCCGTTAGCCACA                                                           | 4 |
| AG876-81600-81720 | 38353830 | GCCCTGGGAGTGTACCTGTACAGTCTCCGGGAAGGGCTTTGACCCGTTAGCCACAACCCATGCCAGTAGAACCCGTCCTGTCTACTGTGACACTGAGCGACCACTTTGTCC                                                            | 4 |
| AG876-81630-81750 | 38526595 | GGAAGGGCTTTGACCCGTTAGCCACAACCCATGCCAGTAGAACCCGTCCTGTCTACTGTGGCACTGAGCGACCACTTTGTCGCGACCTCCTGAGATTGCTATGACGGGCC                                                             | 4 |
| AG876-81660-81780 | 38699360 | ACCATGCCAGTAGAACCCGTCCTGTCCCTACTGTGGCACTTGGCGACCACTTTGTCGCGACCTCCTGAGATTGCTATGACGGGCGGGGGAACCTTCTGGCATTAAACGCACACG                                                         | 4 |
| AG876-81690-81810 | 38872125 | TACTGTGGCACTTGAAGCAGGATTTGTCCCGCACCTCCTGAGATTGCTATGACGGGCGGGGGAACCTTTGGCATTAAACGCACACGCGGAGCGTGGAGGCCCGCACCGTGGACGCC                                                       | 4 |
| AG876-81720-81840 | 39044890 | CGCACCTCCTGAGATTGCTATGACGGGCGGGGGAACCTTTGGCATTAAACGCACACGCGGAGCGTGGAGGCCCGACCGTGGACGCCAAACCCACCCCGCTCTCCAGTCAAGTGTG                                                        | 4 |
| AG876-81780-81900 | 39390420 | GGAGCGTTGGAGGCCCGCACCGTGGAGGCCAAACCCACCCCGCTCTCCAGTCAAGTGTCCGTCGCTGACCGTGTGCTGCTTTGCGTGTGAGGCACAGGCCCGTCAAGGTGTG                                                           | 8 |
| AG876-81810-81930 | 39563185 | AAACCCACCCCGCTCTCCAGTCAAGTGTCCGTCGCTGACCGTGTGCTCTGTTGCGTGTGAGGCACAGGCCCGTCAAGGTGTGAGTGTGAGGCGCCACCCAGTTGACCAAGTATC                                                         | 4 |
| AG876-81960-82080 | 39735950 | ACCAGAGCAGCAGATGTTCCCTGGTCCCTTTAGCCAGGTCGCTGATGTTGCCGGGAATCTGGGGTACCTGCAATGCAGCCTCAGTACTTTGACCTCCCTTAACTCAACCCATTAG                                                        | 4 |
| AG876-81990-82110 | 39908715 | CTTTAGCCAGTGTGCTGATGTTGCCGGGAATCTGGGGTACCTGCAATGCAGCCTCAGTACTTTGACCTCCCTTAACTCAACCCATTAGCCAGGGGCGACCCGCGGCCCGCTTGGAGGC                                                     | 4 |
| AG876-82020-82140 | 40081480 | ATCTGGGTACTGCAATGACGCTCAGTACTTTGACCTCCCTTAACTCAACCCATTAGCCAGGGGCGACCCGCGGCCCGCTTGGAGGCTAGTATGGCCCGGTACCTCCGATACCGGC                                                        | 4 |
| AG876-82050-82170 | 40254245 | CTTTGACCTCCCTTAACTCAACCCATTAGCCAGGGGCGACCCGCGGCCCGCTTGGAGGCTAGTATGGGCCGCTACCTCCGTTACCGGCAACACAGCCACAGTATTTGACATCCCT                                                        | 4 |
| AG876-83640-83760 | 40427010 | CAGAGGCGGTGGAAGCTCCTGTACCTATACAGAACCTGGCGTATGGTACCCTAGCAGCAAAACCCCTCAATGTAACAGTATTTGAGACAGGGGAGATAAAGTCCACCCACTCCTTGTGACT                                                  | 4 |
| AG876-83670-83790 | 40599775 | AGAACCTGGCGTATGGTTACCGTACGCAAAACCCCTCAATGTAACAGTATTTGAGACAGGGGAGATAAAGTCCACCCACTCCTTGTGACTGCTACGCTAGGATGTAAGAGGGCCTGCGG                                                    | 4 |
| AG876-83700-83820 | 40772540 | ACCCTCAATGTAACAGTATTTGAGACAGGGGAGATAAAGTCCACCCACTCCTTGTGACTGCTACGCTAGGATGTAAGAGGGCTGCGGCATGCAATAACTTACAGTGTGCAATTGTA                                                       | 4 |
| AG876-83730-83850 | 40945305 | GGAGATAAAGTCCACCCACTCCTGTGACTGCTACGCTAGGATGTAAGAGGGCTGCGGCATGCAATAACTTACAGTGTGCAATTGACAGCTACACGAATGTGAGACCAAAACCAA                                                         | 4 |
| AG876-83760-83880 | 41118070 | GCTACGCTAGGATGTAAGAGGGCTGCGGCATGCAATAACTTACAGTGTGCAATTGACAGTACCCAGGATGTCAGACCAAAACCAAAAGATGAAACAGCCCTTCTTGTAGGCACGT                                                        | 4 |
| AG876-83790-83910 | 41290835 | CATGCAATAACTTACAGTGTGCAATTGACAGTACCCAGCAATGTCAGACCAAAACCCCTCAATGTAACAGTATTTGAGACAGGGGAGATAAAGTCCACCCACTCCTTGTGACTGCTACGCTAGGATGTAAGAGGGCTGCGGCATGCAATAACTTACAGTGTGCAATTGTA | 4 |
| AG876-83820-83940 | 41463600 | CAGCTACACGAATGTGACGCAAAACCAAAAGATGAAACAGCCCTTCTTGTGACTGCTACGCTAGGATGTAAGAGGGCTGCGGCATGCAATAACTTACAGTGTGCAATTGTA                                                            | 4 |
| AG876-84000-84120 | 41636365 | TTTGTAGGATGGCTATGTAAGAGGACCACTCATATACGTGAATGTTCCGCGAGTGCACCCGGGAGACCCTCACCATCAAGCCATGGATGAGAGCGCATCCCGTCCGCTTCTTAT                                                         | 4 |
| AG876-84030-84150 | 41809130 | ACTCATATACGTGAATGTTCCGCGAGTGCACCCGGGAGACCCTCACCATCAAGCCATGGATGAGAGCGCATCCCGTCCGCTTCTTATGACGATCATTAAACAGTGAAGGACTGAC                                                        | 4 |

|                   |          |                                                                                                                            |   |
|-------------------|----------|----------------------------------------------------------------------------------------------------------------------------|---|
| AG876-84060-84180 | 41981895 | ACCGGGAGACCCTCACCATCCAAGCCATGGATGAGAGCGCATCCCGTGCCTTCTTATGACGATCCATTAACAAGTGAGGAGACTGACCTGGCCTATGCCCGTGGACTGGCCATGAGT      | 4 |
| AG876-84090-84210 | 42154660 | ATGAGAGCGCATCCCGTCCCGTCTTATGACGATCCATTAACAAGTGAGGAGACTGACCTGGCCTATGCCCGTGGACTGGCCATGAGTATCGAGGCTGCTAGACTGCCAGATGATCCA      | 4 |
| AG876-84120-84240 | 42327425 | GACGATCCATTAACAAGTGAGGAGACTGACCTGGCCTATGCCCGTGGACTGGCCATGAGTATCGAGGCTGCTAGACTGCCAGATGATCCAATAATTGTTGAGGATGACGATGAAAGTGAG   | 4 |
| AG876-84150-84270 | 42500190 | CTGGCCTATGCCCGTGGACTGGCCATGAGTATCGAGGCTGCTAGACTGCCAGATGATCCAATAATTGTTGAGGATGACGATGAAAGTGAGAAATGAAGATAAATGTGATAAGGATGAA     | 4 |
| AG876-84180-84300 | 42672955 | ATCGAGGCTGCTAGACTGCCAGATGATCCAATAATTGTTGAGGATGACGATGAAAGTGAGGAAATGAAGATAAATGTGATAAGGATGAAGAGGAAAGTGAACCGGAAGATGTTACAACG    | 4 |
| AG876-84210-84330 | 42845720 | ATAATTGTTGAGGATGACGATGAAAGTGAGGAAATGAAGATAAATGTGATAAGGATGAAGAGGAAAGTGAACCGGAAGATGTTACAAGCATACCGCAACACTGCCGCACAGTCCAAC      | 4 |
| AG876-84240-84360 | 43018485 | GAAATTAAGATAAATGTGATAAGGATGAAGAGGAAAGTGAAGAGGAAAGATGTTACAAGCATACCGCAACACTGCCGCACAGTCCAACAGATACCGGACAGCCCTCGGTGTTTTACCGA    | 4 |
| AG876-84270-84390 | 43191250 | GAGGAAAGTGAACCGGAAGATGTTACAAGCATACCGCAACACTGCCGCACAGTCCAACAGTATACGGCAGGCCCTCGGTGTTTTACCAGAAAGCCAGATACTAAATCAACCAAAAAATGC   | 4 |
| AG876-84300-84420 | 43364015 | ATACCGCAACACTGCCGCACAGTCCAACAGTATACGGCAGGCCCTCGGTGTTTTACCAGAAAGCCAGATACTAAATCAACCAAAAAATGCAGGGCCATAGTACTGACCTTAGTATAATC    | 4 |
| AG876-84330-84450 | 43536780 | GTATACCGCAGGCCCTCGGTGTTTTACCAGAAAGCCAGATACTAAATCAACCAAAAAATGCAGGGCCATAGTACTGACCTTAGTATAATCAAGGTCATTGAAGATGAACACAGAAAGAAG   | 4 |
| AG876-84360-84480 | 43709545 | AAGCCAGATACTAAATCAACCAAAAAATGCAGGGCCATAGTACTGACCTTAGTATAATCAAGGTCATTGAAGATGAACACAGAAAGAAGACAGCCAGACAGCAACCAAGAGCC          | 4 |
| AG876-84390-84510 | 43882310 | AGGGCCATAGTACTGACCTTAGTATAATCAAGGTCATTGAAGATGAACACAGAAAGAAGACAGCCAAAGAGCCAAAGCCGATGATCCCTGCCCCACAGTGGTC                    | 4 |
| AG876-84420-84540 | 44055075 | AAGGTCATTGAAGATGAACACAGAAAGAAGAAGACAGCCAGAACAGAGCAACCAAGAGCCAAAGCCGATGATCCCTGCCCCACAGTGGTCCTTCGGCGACCACCCACGCAAAAGGTGACT   | 4 |
| AG876-84450-84570 | 44227840 | AAGACAGCCAGAACAGAGCAACCAAGAGCCAAAGCCGATGATCCCTGCCCCACAGTGGTCCTTCGGCGACCACCCACGCAAAAGGTGACTGGCCCTGCCGGTTCAGTACTGAGTGGCAGGCT | 4 |
| AG876-84480-84600 | 44400605 | AAGCCTGATCCCTGCCCCACAGTGGTCCTTCGGCGACCACCCACGCAAAAGGTGACTGGCCCTGCCGGTTCAGTACTGAGTGGCAGGCTCAGCTGGAGCCATGGCAACCTTTGCTCTGG    | 4 |
| AG876-84510-84630 | 44573370 | CTTCGGCGACCACCCACGCAAAAGGTGACTGGCCCTGCCGGTTCAGTACTGAGTGGCAGGCTCAGCTGGAGCCATGGCAACCTTTGCTCTGGCCACATGAGACAAGAGTTATACTTCACGGA | 4 |
| AG876-84540-84660 | 44746135 | GGCCCTGCCGGTTCAGTACTGAGTGGCAGGCTCAGCTGGAGCCATGGCAACCTTTGCTCTGGCCACATGAGACAAGAGTTATACTTCACGAGCCACCCACGCGGGTACCAAGCACACGGT   | 4 |
| AG876-84570-84690 | 44918900 | CAGCTGGAGCCATGGCAACCTTTGCTCTGGCCACATGAGACAAGAGTTATACTTCACGAGCCACCCACGCGAGGTTGACCAAGCACACGGTTCATGCTAGACCTTCTTGAAGGACGAC     | 4 |
| AG876-84600-84720 | 45091665 | CCACATGAGACAAGAGTTATACTTCACGAGCCACCCACGCGAGGTTGACCAAGCACACGGTTCATGCTAGACCTTCTTGAAGGACGACCAGCACATGGAGCAGCAGTTATGGCAACC      | 4 |
| AG876-84630-84750 | 45264430 | CCACCACGCGAGGTTGACCAAGCACACGGTTCATGCTAGACCTTCTTGAAGGACGACCAGCACATGGAGCAGCAGTTATGGCAACCTACTGCCACCAGAACCCACACAGCCCGG         | 4 |
| AG876-84660-84780 | 45437195 | TCCATGCTAGACCTTCTTGAAGGACGACCAGCACATGGAGCAGCAGTTATGGCAACCTACTGCCACCAGAACCCACAGCCCGGTTCTGGGAGAAGAGCCCTTGTGTCTACCC           | 4 |
| AG876-84690-84810 | 45609960 | CAGCACATGGAGCAGCAGTTATGGCAACCTACTGCCACCAGCACCCCGGTTCTGGGAGAAGAGCCCTTGTGTCTACACCCTGGGATGACCAAGTATGAGCCGACATGAGAAAGTATGAGCC  | 4 |
| AG876-84720-84840 | 45782725 | CTACTGCCACCAGAACCACACAGCCCGGTTCTGGGAGAAGAGCCCTTGTGTCTACACCCTGACCTAGACATAGAAAGTATGAGCCCGCCACGTCAGAGCCGGTTCCTGATCAGTGA       | 4 |
| AG876-84750-84870 | 45955490 | TCTGGGAGAAGAGCCCTTGTGTCTACACCCTGACCTAGACATAGAAAGTATGAGCCCGCCACGTCAGAGCCGGTTCCTGATCAGTACTGCCCGCCACAGACTGGACCTCTTGAACATTAAC  | 4 |
| AG876-84780-84900 | 46128255 | GCTGACCTAGACATAGAAAGTATGAGCCCGCCACGTCAGAGCCGGTTCCTGATCAGTACTGCCCGCCACAGACTGGACCTCTTGAACATTAACCTTAACGTCACCCACCCAGCTCT       | 4 |
| AG876-84810-84930 | 46301020 | GCCACGTCAGAGCCGGTTCCTGATCAGTACTGCCCGCCACAGACTGGACCTTTCGAATTAACCCATTAACGTCACCCACCCAGCTCTCAACTCCGCGAGTTCAGACCCGACCCACGCA     | 4 |
| AG876-84840-84960 | 46473785 | CTGCCCGCCACAGACTTGGACCTTTCGAATTAACCCATTAACGTCACCCACCCAGCTCTCAACTCCGCGAGTTCAGACCCGAGCCACGCAACCACTCCATGGCCGGTTACCCACCAAGT    | 4 |
| AG876-84870-84990 | 46646550 | ATTCACCCATTAACGTCACCCACCCAGCTCTCAACTCCGCGAGTTCAGACCCGAGCCACGCAACCACTCCATGGCCGGTTCACCCACCAAGTCAAGCTCCAGCTCCAGCTCCAGCTCC     | 4 |
| AG876-84900-85020 | 46819315 | CAACTCCGCGAGTTCAGCACCCGACCCACGCAACCACTCCATGGCCGGTTCACCCACCAAGTCAAGCTCCAGGTTGCCCAACGACACAGTCCCTGGCACCCGAAACAGAAAGCCCGCCAG   | 4 |
| AG876-84930-85050 | 46992080 | CAAACTCCATGGCCGGTTCACCCACCAAGTCAAGCTCCAGGTTGCCCAACGACACAGTCCCTGGCACCCGAAACAGAAAGCCCGCCAGTGGCCAAATGCCACTGCGACCTATCCCTCG     | 4 |
| AG876-84960-85080 | 47164845 | CAGACTCCAGGTTGCCCAACGACACAGTCCCTGGCACCCGAAACAGAAAGCCCGCCAGTGGCCAAATGCCACTGCGACCTATCCCTTGCACCCCTTGGCGATGCAGCCAAATCATTT      | 4 |
| AG876-84990-85110 | 47337610 | CTGGCACCCGAAACAGAAAGCCCGCCAGTGGCCAAATGCCACTGCGACCTATCCCTTGCACCCCTTGGCGATGCAGCCAAATCATTTAATCCTGCAGTGCAGCCACTCCCATCAG        | 4 |
| AG876-85020-85140 | 47510375 | TGGCCAAATGCCACTGCGACCTATCCCTTGCACCCCTTGGCGATGCAGCCAAATCATTTAATCCTGCAGTGCAGCCACTCCCATCAGCCACCTCAGGTTGGAGCCACTTTCATCAG       | 4 |
| AG876-85050-85170 | 47683140 | CACCCCTTGGCGATGCAGCCAAATCATTTAATCCTGCAGTGCAGCCACTCCCATCAGCCACTCAGGTTGGAGCCACTTTCATCAGTCCACTTGGGTGAACCCCTCAACAATAC          | 4 |
| AG876-85080-85200 | 47855905 | AATCCTGCAGTGCAGCCACTCCCATCAGCCACTCAGGTTGGAGCCACTTTCATCAGTCCACTTGGGTGAACCCCTCAACAATACAGCCTCAGATGGGGACACTTCCATATCAG          | 4 |
| AG876-85110-85230 | 48028670 | CCACCTCAGGTTGGAGCCACTTTCATCAGTCCACTTGGGTGAACCCCTCAACAATACAGCCTCAGATGGGGACACTTCCATATCAGCCCGACCAACCGGTCAGTCTACTATGCTC        | 4 |
| AG876-85140-85260 | 48201435 | TCCACTTGGGTGAACCCCTCAACAATACAGCCTCAGATGGGGACACTTCCATATCAGCCCGACCAACCGGTCAGTCTACTATGCTCCGCCCCAGTGGGCACCCACCCATGCAG          | 4 |
| AG876-85200-85320 | 48546965 | CCCCGACCAACCGGTCAGTCTACTATGCTCCGCCCCAGTGGGCACCCACCCATGCAGCCACCCAAAGGCGCCCACTCCCATGCCGCCACTCAGGGGCCACCCACCCGCTATGCAG        | 8 |
| AG876-85230-85350 | 48719730 | CGGCCCTGCGGATGCAGCCAAATCATTTAATCCTGCAGTGCAGCCACTCCCATCAGCCACTCAGGTTGGAGCCACTTTCATCAGTCCACTTGGGTGAACCCCTCAACAATAC           | 8 |
| AG876-85260-85380 | 48892495 | CCACCACCAAGGGCGCCACTCCCATGCCGCCACTCAGGGGCCACCCACCGCTATGCAGAGGCTCAGGGGGCGCCACTCCCATGCCGCCACTCAGGGGACACCCACCCGCTATGCAG       | 8 |
| AG876-85290-85410 | 49065260 | CCACCTCAGGGGCCACCCACCGCTATGCAGAGGCTCAGGGGGCGCCACTCCCATGCCGCCACTCAGGGGACACCCACCGCCATGCAGAGGCTCAGGGTGCGCCACTCCCATGCCG        | 8 |
| AG876-85320-85440 | 49238025 | AGGCCTCAGGGGGCGCCACTCCCATGCCGCCACTCAGGGGACACCCACCGCCATGCAGAGGCTCAGGGTGCGCCACTCCCATGCCGCCACTCAGGGGACACCCACCCGCTATGCAG       | 8 |
| AG876-85350-85470 | 49410790 | CCACCTCAGGGGACACCCACCGCCATGCAGAGGCTCAGGGTGCGCCACTCCCATGCCGCCACTCAGGGGACACCCACCGCCATGCAGAGGCTCAGGGTGCGCCACTCCCATGCCG        | 8 |
| AG876-85380-85500 | 49583555 | AGGCCTCAGGGTGCGCCACTCCCATGCCGCCACTCAGGGGACACCCACCGCCATGCAGAGGCTCAGGGTGCGCCACTCCCATGCCGCCACTCAGGGGACACCCACCCGCTATGCAG       | 8 |
| AG876-85410-85530 | 49756320 | CCACCTCAGGGGACACCCACCGCCATGCAGAGGCTCAGGGTGCGCCACTCCCATGCCGCCACTCAGGGGACACCCACCGCCATGCAGAGGCTCAGGGTGCGCCACTCCCATGCCG        | 8 |
| AG876-85440-85560 | 49929085 | AGGCCTCAGGGTGCGCCACTCCCATGCCGCCACTCAGGGGACACCCACCGCCATGCAGAGGCTCAGGGTGCGCCACTCCCATGCCGCCACTCAGGGGACACCCACCCGCTATGCAG       | 8 |
| AG876-85470-85590 | 50101850 | CCACCTCAGGGGACACCCACCGCCATGCAGAGGCTCAGGGTGCGCCACTCCCATGCCGCCACTCAGGGGACACCCACCGCCATGCAGAGGCTCAGGGGCGCCACTCCCATGCCG         | 8 |
| AG876-85500-85620 | 50274615 | AGGCCTCAGGGTGCGCCACTCCCATGCCGCCACTCAGGGGACACCCACCGCCATGCAGAGGCTCAGGGGACACCCACCGCCATGCAGAGGCTCAGGGGACACCCACCCGCTATGCAG      | 8 |
| AG876-85530-85650 | 50447380 | CCACCTCAGGGGACACCCACCGCCATGCAGAGGCTCAGGGTGCGCCACTCCCATGCCGCCACTCAGGGGACACCCACCGCCATGCAGAGGCTCAGGGGCGCCACTCCCATGCCG         | 8 |
| AG876-85560-85680 | 50620145 | AGGCCTCAGGGGCGCCACTCCCATGCCGCCACTCAGGGGACACCCACCGCCATGCAGAGGCTCAGGGGCGCCACTCCCATGCCGCCACTCAGGGGACACCCACCCGCTATGCAG         | 8 |
| AG876-85590-85710 | 50792910 | CCACCTCAGGGGACACCCACCGCCATGCAGAGGCTCAGGGGCGCCACTCCCATGCCGCCACTCAGGGGACACCCACCGCCATGCAGAGGCTCAGGGGCGCCACTCCCATGCCG          | 8 |

|                   |          |                                                                                                                                 |    |
|-------------------|----------|---------------------------------------------------------------------------------------------------------------------------------|----|
| AG876-85620-85740 | 50965675 | AGGCCTCAGGGGGCGCCCACTCCCATGCCGCCACTCAGGGGCCACCCACGCCATGCAGAGGCCCTCGGGGGCGCCCACTCCCATGCCGCCACTCAGGGGCCACCCACGCCATGCAG            | 12 |
| AG876-85650-85770 | 51138440 | CCACCTCAGGGGCCACCCACGCCATGCAGAGGCCCTCGGGGGCGCCCACTCCCATGCCGCCACTCAGGGGCCACCCACGCCATGCAGAGGCCCTCAGGGGGCGCCCACTCCCATGCCG          | 12 |
| AG876-85680-85800 | 51311205 | AGGCCTCGGGGGCGCCCACTCCCATGCCGCCACTCAGGGGCCACCCACGCCATGCAGAGGCCCTCAGGGGGCGCCCACTCCCATGCCGCCACTCAGGGGCCACCCACGCCATGCAG            | 12 |
| AG876-85710-85830 | 51483970 | CCACCTCAGGGGCCACCCACGCCATGCAGAGGCCCTCAGGGGGCGCCCACTCCCATGCCGCCACTCAGGGGCCACCCACGCCATGCAGAGGCCCTCGGGGGCGCCCACTCCCATGCCG          | 12 |
| AG876-85740-85860 | 51656735 | AGGCCTCAGGGGGCGCCCACTCCCATGCCGCCACTCAGGGGCCACCCACGCCATGCAGAGGCCCTCGGGGGCGCCCACTCCCATGCCGCCACTCAGGGGCCACCCACGCCATGCAG            | 12 |
| AG876-85770-85890 | 51829500 | CCACCTCAGGGGCCACCCACGCCATGCAGAGGCCCTCGGGGGCGCCCACTCCCATGCCGCCACTCAGGGGCCACCCACGCCATGCAGAGGCCCTCAGGGGGCGCCCACTCCCATGCCG          | 12 |
| AG876-85800-85920 | 52002265 | AGGCCTCGGGGGCGCCCACTCCCATGCCGCCACTCAGGGGGCGCCCACTCCCATGCCGCCACTCAGGGGCCACCCACGCCATGCAGAGGCCCTCAGGGGGCGCCCACTCCCATGCCG           | 12 |
| AG876-85830-85950 | 52175030 | CCACCTCAGGGGGCGCCCACTCCCATGCCGCCACTCAGGGGGCGCCCACTCCCATGCCGCCACTCAGGGGCCACCCACGCCATGCAGAGGCCCTCGGGGGCGCCCACTCCCATGCCG           | 12 |
| AG876-85860-85980 | 52347795 | AGGCCTCAGGGGGCGCCCACTCCCATGCCGCCACTCAGGGGGCGCCCACTCCCATGCCGCCACTCAGGGGCCACCCACGCCATGCAGAGGCCCTCGGGGGCGCCCACTCCCATGCCG           | 12 |
| AG876-85890-86010 | 52520560 | CCACCTCAGGGGGCGCCCACTCCCATGCCGCCACTCAGGGGGCGCCCACTCCCATGCCGCCACTCAGGGGGCGCCCACTCCCATGCCGCCACTCAGGGGCCACCCACGCCATGCAG            | 8  |
| AG876-85920-86040 | 52693325 | AGGCCTCGGGGGCGCCCACTCCCATGCCGCCACTCAGGGGGCGCCCACTCCCATGCCGCCACTCAGGGGGCGCCCACTCCCATGCCGCCACTCAGGGGGCGCCCACTCCCATGCCG            | 8  |
| AG876-85950-86070 | 52866090 | CCACCTCAGGGGGCGCCCACTCCCATGCCGCCACTCAGGGGGCGCCCACTCCCATGCCGCCACTCAGGGGGCGCCCACTCCCATGCCGCCACTCAGGGGGCGCCCACTCCCATGCCG           | 4  |
| AG876-85980-86100 | 53038855 | CTGTACCAAGGGCACTTACCAGCCAGAAGGGGCCAGCAAGCACATTCTGCCAGTTGTTAACGGGGGGCGTCAAGAGTGGGAGACCATCACTTAAGTTAAGGCTGCCCTTGAGCGT             | 4  |
| AG876-86010-86130 | 53211620 | GGGCCAGCAAGCACATTCTGCCAGTTGTTAACGGGGGGCGTCAAGAGTGGGAGACCATCACTTAAGTTAAGGCTGCCCTTGAGCGTCAAGCCGCTGCGGGCTTGCAGCTTACCA              | 4  |
| AG876-86040-86160 | 53384385 | TTAACGGGGGGCGTCAAGAGTGGGAGACCATCACTTAAGTTAAGGCTGCCCTTGAGCGTCAAGCCGCTGCGGGCTTGCAGCTTACCAGGGTCTGGAACGGGTGCCAAGATTGTGAG            | 4  |
| AG876-86070-86190 | 53557150 | TCACTTAAGTTAAGGCTGCCCTTGAGCGTCAAGCCGCTGCGGGCTTGCAGCTTACCAGGGTCTGGAACGGGTGCCAAGATTGTGAGGACCTGTTTCTATCCACCCGCTCTACAG              | 4  |
| AG876-86100-86220 | 53729915 | CAAGCCGCTGCGGGCTTGCAGCTTACCAGGGTCTGGAACGGGTGCCAAGATTGTGAGGACCTGTTTCTATCCACCCGCTCTACAGCCCATACAAGTTATGTGGCAAGTGGGTTCC             | 4  |
| AG876-86130-86250 | 53902680 | GGGTCTGGAACGGGTGCCAAGATTGTGAGGACCTGTTTCTATCCACCCGCTCTACAGCCCATACAAGTTATGTGGCAAGTGGGTTCTCAAAGGCCGTGCCCGCTCAACGGTGACA             | 4  |
| AG876-86160-86280 | 54075445 | GCACCTGTTTTCTATCCACCCGCTCTACAGCCCATACAAGTTATGTGGCAAGTGGGTTCTCAAAGGCCGTGCCCGCTCAACGGTGACACAGGACCCACGGAATATACCGGGAAAGG            | 4  |
| AG876-86190-86310 | 54248210 | CCCATACAAGTTATGTGGCAAGTGGGTTCTCAAAGGCCGTGCCCGCTCAACGGTGACACAGGACCCACCGAATATACCGGGGAAAGGAGGTTAGGGGGGCTTATGTCTCCCACTGAT           | 4  |
| AG876-86220-86340 | 54420975 | TCAAAGCCGCTGCCCGCTCAACGGTGACACAGGACCCACCGAATATACCGGGGAAAGGAGGTTAGGGGGGCTTATGTCTCCCACTGATATCCCGCTCAAACGGGTGAAGAAAAAG             | 4  |
| AG876-86250-86370 | 54593740 | CAGGCACCCAGGAATATACCGGGGAAAGGAGGTTAGGGGGGCTTATGTCTCCCACTGATATTCGCCGCTCAAACGGGTGAAGAAAAAGCCCTATCCAGAGCGCAAGCCCGCATGGG            | 4  |
| AG876-86280-86400 | 54766505 | AGGTTAGGGGGCCTATGTCTCCCACTGATATTCGCCGCTCAAACGGGTGAAGAAAAAGCCCTATCCAGAGCGCAAGACGCCGATGGGGGGCCTCACACTTCCACCGTTATGTGG              | 4  |
| AG876-86310-86430 | 54939270 | ATTCGCCGCTCAAACGGGTGAAGAAAAAGCCCTATCCAGAGCGCAAGACGCCGATGGGGGGCCTCACACTTCCACCGTTATGTGGGAGAAATGCAGCCAGGACAAACAGCAGACT             | 4  |
| AG876-86340-86460 | 55112035 | GCCTATCCAGAGCGCAAGACGCCGATGGGGGGCCTCACACTTCCACCGTTATGTGGGAGAAATGCAGCCAGGACAAACAGCAGACTCTGGAGTGCAGGAGAACTGATAAACAGGAA            | 4  |
| AG876-86370-86490 | 55284800 | GGGCCCTCACACTTCCACCGTTATGTGGGAGAAATGCAGCCAGGCAACAGCAGACTCTGGAGTGCAGGAACTGATAAACAGGAAAGGAACATGTTGGGGATGGGGGACATTGCA              | 4  |
| AG876-86400-86520 | 55457565 | GAGAATGCAGCCAGGGAACAACAGCAGACTCTGGAGTGGGAGGAACTGATAAACAGGAAAGAACTATGGGGATGGGGGACATTGCAGTTTCTCCCTTCTCTTGAACATCTCG                | 4  |
| AG876-86430-86550 | 55630330 | CTGGAGTCGGGAGAACTGATAAACAGGAAAGGAACATGTTGGGATGGGGGACATTGCAGTTTCTCCCTTCTCTTGAACATCTCG                                            | 4  |
| AG876-86580-86700 | 55803095 | CTGCGGGGAGGGGAGTATAAGTCATGACAATTTAGATGAGGTAGACATTTTGCATATTTTTCAGACCCACCATGGAATCATTTGAAGGAGAGGGGGACTCTATACAGTCACTGACAA           | 4  |
| AG876-86610-86730 | 55975860 | AATTTTAGATGAGGTAGACATTTTGCATATTTTTCAGACCCACCATGGAATCATTTGAAGGAGAGGGGGACTCTATACAGTCACTGACAATGCCGCGGGAGATGATGACAGAATACTGG         | 4  |
| AG876-86640-86760 | 56148625 | TTTCAGACCCACCATGGAATCATTTGAAGGAGAGGGGGACTCTATACAGTCACTGACAATGCCGCGGGAGATGATGACAGAATACTGGTGAAGTATTCAGGACCCCGGGCGGGGCC            | 4  |
| AG876-86670-86790 | 56321390 | AGAGGGGACTCTATACAGTCACTGACAATGCCGCGGGAGATGATGTACAGAATACTGGTGAAGTATTCAGGACCCCGGGCGGGGCTTCAACCGCGGGGCTTCTGAGGGATTGGT              | 4  |
| AG876-86700-86820 | 56494155 | TGCGCGGGGAGATGATGTACAGAATACTGGTGAAGTATTCAGGACCCCGGGCGGGGCTTCAACCGCGGGGCTTCTGAGGATTGGTGCAGAACAGCCGACTCAAGAGATCAACA               | 4  |
| AG876-86730-86850 | 56666920 | TGAGCATATTCAGGACCCCGGGCGGGGCTTCAACCGCGGGGCTTCTGAGGGATTGGTGCAGAACAGCCGACTCAAGAGATCAACAGTCCCGGGGCGAGAGAAGGGGTGATGAAAA             | 4  |
| AG876-86760-86880 | 56839685 | TTCAACCGGGCGGGCTTCTGAGGGATTGGTGCAGAACAGCCGACTCAAGAGATCAACAGTCCCGGGGCGAGAGAAGGGGTGATGAAAACAGAGGCTGGATGCAGCGCATCAGCGGAAG          | 4  |
| AG876-86790-86910 | 57012450 | GCAGAACGAGCCGACTCAAGAGATCAACAGTCCCGGGGCGAGAGAAGGGGTGATGAAAACAGAGGCTGGATGCAGCGCATCAGCGGAAGCCGAGAAAGCCGCGCATTGTCGGGCCA            | 4  |
| AG876-86820-86940 | 57185215 | GTCCCGGGGCGAGAGAAGGGGTGATGAAAACAGAGGCTGGATGCAGCGCATCAGCGGAAGCCGAGAGAAGCCGCGCATTTTTCAGACCCACCATGGAATCATTTGACAGTGAAGACAATGTGCCGCC | 4  |
| AG876-86850-86970 | 57357980 | CAGAGCTGGATGCAGCGCATCAGCGGAAGGGCGGAGAAGACCGGCCATTGTCCCGCCATCTTTTAGACATGGAAGACAATGTCCCGCCGTTTCTCCACAGATATCACACCATA               | 4  |
| AG876-86880-87000 | 57530745 | GCGGAGAAGACGGCCGATTGTCCCGCCATCTTTTAGACATGGAAGACAATGTCCCGCGTGGTTTCTCCACAGATATCACACCATATGTCGAAGGAATATCAGGGACGCTGCCTG              | 4  |
| AG876-86910-87030 | 57703510 | TCTTTTAGACATGGAAGACAATGTCCCGCGTGGTTTCTCCACAGATATCACACCATATGTCGAAGGAATATCAGGGAGCTGCCTGCCAGGCTGCAAGGTGAGCATGCCTCTAAC              | 4  |
| AG876-86940-87060 | 57876275 | GTGGTTTCTCCACAGATATCACACCATATGTCGCAAGGAATATCAGGGAGCTGCCTGCCAGGCTGCAAGGTGAGCATGCCTTAACTGGGTTATGGGGCCATCTAAGGCCACAG               | 4  |
| AG876-87390-87510 | 58049040 | TTCTCCGCCACCGTGTGGATACCACCCCTGCTGGACCAAGAGAGCAAGAAAGATACGCTCGGGAAGCCGAGGTGCGCTTCTTCTCGTGAATGGCAGAGGGGTTCCGAAGAATCTTT            | 4  |
| AG876-87420-87540 | 58221805 | GCTGGACCAAGAGAGCAAGAAAGTACCGTCGGGAAGCCGAGGTGCGCTTCTTCTCGTGAATGGCAGAGCGGTTCCGAAGAACTTTTATTGATAGAATGTGTGCTCTGAC                   | 4  |
| AG876-87990-88110 | 58394570 | CCTACACCAAGACGCCACCCAGTGAAGCGACAATTTGTAAGACTCTATAGATCTGATGAGGCAGAAGAAGCACAGAGACCCCTGAAAGGCCGGCCCTTCAAACAACCATCAGAG              | 4  |
| AG876-88020-88140 | 58567335 | ACAATTGTTAAGACTCTATAGATCTGATGAGGCAGAAGAAGCACAGAGACCCCTGAAAGGCCGGCCCTTCAAACAACCATCAGAGCCGCTGGAGCCCGCCACACAACCCAGCG               | 4  |
| AG876-88050-88170 | 58740100 | GAGGAGAAGAAGCACAGAGCACCCCTGAAAGCCGGGCCCTTCAAACAACCATCAGAGCCGCTGGAGCCCGCCACACAACCCACGCGGGGAGGTCAACCGTATTCTCCACGAACCA             | 4  |
| AG876-88080-88200 | 58912865 | AGGCCGGGCCCTTCAAACAACCATCAGAGCCCGTGGAGCCCGCCACACAACCCAGCGGGAGGTCAACCGTATTCTCCACGAACCCACTCGAGAGCCCGAAGCTGTTCTTCTCAAG             | 4  |
| AG876-88140-88260 | 59258395 | GGGAGTCAACGGTATTCTCCACCAACCCACTCAGAGCCCGAAGCTGTTTCTTCAAGCTCCGCCACCCCTCCGGAGGAGAAGGGGAGCGTGTGTATGACGATGATATGACGATGATATC          | 4  |
| AG876-88170-88290 | 59431160 | CCTCAGAGCCCGAAGCTGTTTCTTCAAGCCTCCGCCACCCCTCCCGAGGAGAAGGGGAGCGTGTGTATGACGATGATATCAGAGGTTGATTGTTGAAACCACCGAA                      | 4  |
| AG876-88200-88320 | 59603925 | CCTCCGCCACCATCTCCCGGAGGAGAAGGGGAGCGTGTGTATGACGATGATATCAGAGGTTGATTGTTGAAACCACCGAAGAGGAGACGACGTCATGCAAGACAGCCT                    | 4  |
| AG876-88230-88350 | 59776690 | GGAGCGTGTGTATATGACGATGATATCAGAGGTTGATTGATTGAAACCACCGAAGAGGAGACGACGTCATGCAAGACAGCCTCCGCTCGGGCAACACCCGCCCCCGCTG                   | 4  |

|                   |          |                                                                                                                                                        |   |
|-------------------|----------|--------------------------------------------------------------------------------------------------------------------------------------------------------|---|
| AG876-88260-88380 | 59949455 | ATAGAGGTGATTGATGTTGAAACCACCGAAGAGGAGACGAGTCAATGCAAAAGACAGCTCCGCTCGGGCAACAACCGCCCCCCCCCGTATTCTACCGGGAGTGCCATGTCTCCAGT                                   | 4 |
| AG876-88290-88410 | 60122220 | GAGGAGACGACGTCATGCAAAGACAGCCTCCGCTCGGGCAACAACCGCCCCCCCCCGTATTCTACCGGGAGTGCCATGTCTCCAGTCACACGGATCCATCAGTAACACAGCCAAAGT                                  | 4 |
| AG876-88320-88440 | 60294985 | CCGCTCGGGCAACAACCGCCCCCCCCCGTATTCTACCGGGAGTGCCATGTCTCCAGTCACACGGATCCATCAGTAACACAGCCAAAGTAAAGCCACATCGGAAACCTCAAGACGGATTTCAACGTTACAGGCCGACGTCAAAAACGAGCC | 4 |
| AG876-88350-88470 | 60467750 | ATTCTACCGGGAGTGCCATGTCTCCAGTCACACGGATCCATCAGTAACACAGCCAAAGTAAAGCCACATCGGAAACCTCAAGACGGATTTCAACGTTACAGGCCGACGTCAAAAACGAGCC                              | 4 |
| AG876-88380-88500 | 60640515 | CACACGGATCCATCAGTAACACAGCCAAAGTAAAGCCACATCGGAAACCTCAAGACGGATTTCAACGTTACAGGCCGACGTCAAAAACGAGCCATGCCTCCCCAGTGAGTCTCTTGACGCT                              | 4 |
| AG876-88410-88530 | 60813280 | AAGCCACATCGGAAACCTCAAGACGGATTTCAACGTTACAGGCCGACGTCAAAAACGAGCCATGCCTCCCCAGTGAGTCTCTTGACGCTGGGCTCCTTCCACCGAGCCCTCGTGATG                                  | 4 |
| AG876-88440-88560 | 60986045 | CAACGTTACAGCCGACGTCAAAACGAGCCATGCCTCCCCAGTGAGTCTCTTGACGCTGGGCTCCTTCCACCGGGCTCGTGACATGGCGCTCCTTCCACCGGGCTCCTCCAGCCGAGCCATGTTACGAGG                      | 4 |
| AG876-88470-88590 | 61158810 | ATGCCTCCCCAGTGAGTCTCTTGACGCTGGGCTCCTTCCACCGAGCCCTCGTGATGGCGCTCCTTCCACCGGGCTCGTGACATGGCGCTCCTTCCACCGGGCTCGTGACATG                                       | 8 |
| AG876-88500-88620 | 61331575 | GGGCTCCTTCCACCGAGGCTCGTGATGGCGCTCCTTCCACCGGGCTCGTGACATGGCGCTCCTTCCACCGGGCTCGTGACATGGCGCTCCTTCCACCGGGCTCGTGACATG                                        | 8 |
| AG876-88530-88650 | 61504340 | GCGCTCCTTCCACCGGGCTCGTGATGGCGCTCCTTCCACCGGGCTCGTGACATGGCGCTCCTTCCACCGGGCTCGTGACATGGCGCTCCTTCCACCGGGCTCGTGACATG                                         | 8 |
| AG876-88560-88680 | 61677105 | GCGACTCCTTCCACCGGGCTCGTGACATGGCGCTCCTTCCACCGGGCTCGTGACATGGCGCTCCTTCCACCGGGCTCGTGACATGGCGCTCCTTCCACCGGGCTCGTGACATG                                      | 8 |
| AG876-88590-88710 | 61849870 | GCGCTCCTTCCACCGGGCTCGTGACATGGCGCTCCTTCCACCGGGCTCGTGACATGGCGCTCCTTCCACCGGGCTCGTGACATGGCGCTCCTTCCACCGGGCTCGTGACATG                                       | 8 |
| AG876-88620-88740 | 62022635 | GCGCTCCTTCCACCGGGCTCGTGACATGGCGCTCCTTCCACCGGGCTCGTGACATGGCGCTCCTTCCACCGGGCTCGTGACATGGCGCTCCTTCCACCGGGCTCGTGACATG                                       | 8 |
| AG876-88650-88770 | 62195400 | GCGCTCCTTCCACCGGGCTCGTGACATGGCGCTCCTTCCACCGGGCTCGTGACATGGCGCTCCTTCCACCGGGCTCGTGACATGGCGCTCCTTCCACCGGGCTCGTGACATG                                       | 8 |
| AG876-88680-88800 | 62368165 | GCGCTACCGCTCGTACATATGTTTACGAGGGAGCGCTGCTACCCAGTCCACCGGGCTCGACTCGGAGCTTCTGGGAAATGCGGGCCGGCGTATGCTCCCAAAATTCACAAGAA                                      | 4 |
| AG876-88710-88830 | 62540930 | GAGCGCTGCTACCCAGTCCACCGGGCTGACCTCGGAGCTTCTGGGAAATGCGGGCCGGCGTATGCTCCCAAAATTCACAAGAACCAAGTTCACAACAGCAGCCAGCCACTCAG                                      | 4 |
| AG876-88740-88860 | 62713695 | GCACTCGGAGCTTCTGGGAAATGCGGGCCGGCGTATGCTCCCAAAATTCACAAGAACCAAGTTCACAACAGCAGCCAGCCACTCAGTACACCGCTTCCCAATCATGGTCCCA                                       | 4 |
| AG876-88770-88890 | 62886460 | GGCGTGATGCTCCCAAAATTCACAAGAACCAAGTTCACAACAGCAGCCAGCCACTCAGTACACCGCTTCCCAATCATGGTCCCAATCTGCTATGCTCCTCCCGGAGTGGATGCT                                     | 4 |
| AG876-88800-88920 | 63059225 | CCAAGTTCACAACAGCAGCCAGCCACTCAGTACACCGCTTCCCAATCATGGTCCCAATCTGCTATGCTCCTCCCGGAGTGGATGCTGGTATGCCAGCCCTACAATATCACAC                                       | 4 |
| AG876-88830-88950 | 63231990 | TCTACACCGCTTCCCAATCATGGTCCCAATCTGCTATGCTCCTCCCGGAGTGGATGCTGGTAAATGCCAGCCCTACAATATCACACTTGAGCTCCATGTCGCCACGCAGCCGATA                                    | 4 |
| AG876-88860-88980 | 63404755 | TCTGTCTATGCTCCTCCCGGAGTGGATGCTGGTAAATGCCAGCCCTACAATATCACACTTGAGCTCCATGTCGCCACGCAGCCGATATCGCATGAAGAACAACCCCGGATGAGGAT                                   | 4 |
| AG876-88890-89010 | 63575285 | GGTAAATGCCAGCCCTACAATATCACACTTGAGCTCCATGCTGCCAGCAGCCGATGAGGATCGTACTCCTCTGGATTTGAGTTTACATCCAGATACTGCAACTCTGCCGCCACCCAG                                  | 4 |
| AG876-88920-89040 | 63750285 | TTGAGCTCCATGTCGCCACGCAGCCGATTCGCATGAAGAACAACCCCGGATGAGGATCCTGACACTCCTTGGATTTGAGTTTACATCCAGATACTGCAACTCTGCCGCCACCCAG                                    | 4 |
| AG876-88950-89070 | 63923050 | TCGCATGAAGAACAACCCCGTATGAGGATCCTGACACTCCTCTGGATTTGAGTTTACATCCAGATACTGCAACTCTGCCGCCACCCAGGATTTATACCTGGACGCGAGGATCTGCAG                                  | 4 |
| AG876-88980-89100 | 64095815 | CCTGACACTCCTCTGGATTTGAGTTTACATCCAGATACTGCAACTCTGCCGCCACCCAGGATTTATACCTGGACGCGAGGATCTGCAGGCCACCCAGGCTCCATACCCGGGATACGAG                                 | 4 |
| AG876-89010-89130 | 64268580 | CCAGATACTGCAACTCTGCCGCCACCCAGGATTTATACCTGGACGCGAGGATCTGCAGGCCACCCAGGCTCCATACCCGGGATACGAGGAGCCAGGCCGCCCGCCAGGCTCCTTTGTA                                 | 4 |
| AG876-89040-89160 | 64441345 | GATTTATACCTGGACGCGAGGATCTGCAGGCCACCCAGGCTCCATACCCGGGATACGAGGACCCAGCCGCCCGCCCGGATCCTTTTGTAGTGACTATGGTTTTGTTCAAATTCCTCTG                                 | 4 |
| AG876-89070-89190 | 64614110 | GCCACCCAGGCTCCATACCCGGGATACGAGGACCCCGGTTCCCAAGATCCATATGTGTAATCCCGGGGCAATTTGCTTCATGTCAGGTTATGCAAGTCCCTCGGCTCAGGCG                                       | 4 |
| AG876-89100-89220 | 64786875 | GAGCCACGGCCCCCAGGCTCCTTTGTAGGTGACTATGGTTTTGTTCAAATTCCTCGGCTCAATGGGAGCCACACCCCTCTCAGGGCACATACCAGGGCCACATTGATCCCCAGCTT                                   | 4 |
| AG876-89130-89250 | 64959640 | GGTGACTATGTTTTGTTCAAATTCCTCGGCTCAATGGGAGCCACACCCCTCTCAGGGCACATACCAGGGCCACATTGATCCCCAGCTTCCGGCTGCTCTAGATTTAGGGCCAGAGCAG                                 | 4 |
| AG876-89160-89280 | 65132405 | GCTCAATGGGAGCCACACCCCTCTCAGGGCACATACCAGGGCCACATTGATCCCCAGCTTCCGGCTGCTCTAGATTTAGGGCCAGAGCAGCCCGGTTCCCAAGATCCATATGTGTAT                                  | 4 |
| AG876-89190-89310 | 65305170 | ACATACAGGGCCACATTGATCCCCAGCTTCCGGCTGCTCTAGATTTAGGGCCAGAGCAGCCCGGTTCCCAAGATCCATATGTGTAATCCGGGGCAATTTGCTTCATGTCAGGT                                      | 4 |
| AG876-89220-89340 | 65477935 | CCGGCTGCTCTAGATTTAGGGCCAGAGCAGCCCGGTTCCCAAGATCCATATGTGTAATCCCGGGGCAATTTGCTTCATGTCAGGTTATGCAAGTCCCTCGGCTCAGGCTCAA                                       | 4 |
| AG876-89250-89370 | 65650700 | CCCCGGTTCCCACAAGATCCATATGTGTAATCCCGGGGCAATTTGCTTCATGTCAGGTTATGCAAGTCCCTGGCCCTCGAGGCCCTCAACATCCAAGATATAGGCACACCTTGGCATTG                                | 4 |
| AG876-89280-89400 | 65823465 | TCCGGGGGCAATTTGCTTCATGTCAGGTTATGCAAGTCCCTGGCCCTCGAGGCCCTCAACATCCAAGATATAGGCACACCTTGGCATTGTGGCTCGAGAACCCAGGCATGGGCACTCT                                 | 4 |
| AG876-89310-89430 | 65996230 | TATGCAAGTCCCTGGCCCTCGAGGCCCTCAACATCCAAGATATAGGCACACCTTGGCATTGTGGCTCGAGAACCAGGCATGGGCACTCTCAGGGCCATGGAACCCCTGGTCAGCACAT                                 | 4 |
| AG876-89340-89460 | 66168995 | CATCCAAGATATAGGCACACCTTGGCATTGTGGCTCGAGAACCAGGCATGGGCACTCTCAGGGCCATGGAACCCCTGGTCAGCACATCTCCACCTCAGTGGATGGATCTGCAGGA                                    | 4 |
| AG876-89370-89490 | 66341760 | TGGCCTCGAGAACCAGGCATGGGCACTCTCAGGGCCATGGAACCCCTGGTCAGCACATCTCCACCTCAGTGGATGGATCTGCAGGACATGGCCAGGATCAGTCTCCCAAGTTC                                      | 4 |
| AG876-89400-89520 | 66514525 | CAGGGCCATGGAACCCCTGGTCAGCACATCTCCACCTCAGTGGATGGATCTGCAGGACATGGCCAGGATCAGGCTCTCCAGTTCACATCTGCATTCCGAGACAGGGCCACCCAGT                                    | 4 |
| AG876-89430-89550 | 66687290 | CTCCACCTCAGTGGATGGATCTGCAGGACATGGCCAGGATCAGGCTCTCCAGTTCACATCTGCATTCCGAGACAGGCCACCCAGCTTCAACTTTCATCGGTGCCACAGGTGCTG                                     | 4 |
| AG876-89550-89670 | 66860055 | TACCGCACGCACTGGTCTCATCCTCTGCACCATCTGGTCTATCTCCACAGCCCGAGCCCCATACGCCCATTCACAAGATTCACCCCTCCCTCATGCGGTACAAAGATAGCATG                                      | 4 |
| AG876-89580-89700 | 67032820 | CCATCGTGGTCTCTCCACGCCCCGAGCCCCATACGCCCATTCACAAGATTCACCCCTCCCTCATGCGGTTACAAGATAGCATGGCCGTGGGTCGACTCATCAGGTACAGCA                                        | 4 |
| AG876-91110-91230 | 67205585 | CTGCGCCCTCCTTGAGCCCCACCATCCGCTGCCACCCTCTTGAGCCCCCCTGCGCTGCCACCTCTTTGAGCCCTTCTTACCAGTCTTGCGTGTAGTGGTTTTCTTTGACGCTG                                      | 4 |
| AG876-91140-91260 | 67378350 | TGCCACCTCTTTGAGCCCCACCGTCCGCTGCCACCCTCTTTGAGCCCCCTTACCAGTCTTGCGTGTAGTGGTTTTCTTTGACGCTGTCGGGGCAGCCGCTGGTGCAGGCTGTGGA                                    | 4 |
| AG876-91170-91290 | 67551115 | GCCACCTCTTTGAGCCCTTCTTACCAGTCTGGCTGTAGTGGTTTTCTTTGACGCTGTCGGGGCAGCCGCTGGTGCAGGCTGTGGAGCACAATGCTGCTAGCTGTTGCTCTGG                                       | 4 |
| AG876-91200-91320 | 67723880 | TCTGGCTGTAGTGGTTTTCTTTGACGCTGTCGGGGGAGCCGCTGGTGCAGGCTGTGGAGCACAATGCTGCTAGCTGTTGCTCTGGTTAGCCCGGGACAAGCAACACCACTGCT                                      | 4 |
| AG876-96750-96870 | 67896645 | GTGGAACAGGAGCAGGAGGGGGCAGGAGCAGGAGGGGCAGGAGCAGGAGGGGCAGGAGCAGGAGGGGCAGGAGCAGGAGGGGCAGGAGCAGGAGGGGCAGGAGCAGGAGGGGCAGGAG                                 | 8 |
| AG876-96780-96900 | 68069410 | CAGGAGGGGCAGGAGCAGGAGGGGGCAGGAGCAGGAGGGGCAGGAGCAGGAGGGGCAGGAGCAGGAGGGGCAGGAGCAGGAGGGGCAGGAGCAGGAGGGGCAGGAGCAGGAGGGGCAGGAG                              | 8 |
| AG876-96810-96930 | 68242175 | CAGGAGGGGCAGGAGCAGGAGGGGGCAGGAGCAGGAGGGGCAGGAGCAGGAGGGGCAGGAGCAGGAGGGGCAGGAGCAGGAGGGGCAGGAGCAGGAGGGGCAGGAGCAGGAGGGGCAGGAG                              | 8 |
| AG876-96840-96960 | 68414940 | CAGGAGGGGCAGGAGCAGGAGGGGGCAGGAGCAGGAGGGGCAGGAGCAGGAGGGGCAGGAGCAGGAGGGGCAGGAGCAGGAGGGGCAGGAGCAGGAGGGGCAGGAGCAGGAGGGGCAGGAG                              | 8 |
| AG876-96870-96990 | 68587705 | CAGGAGGGGCAGGAGCAGGAGGGGGCAGGAGCAGGAGGGGCAGGAGCAGGAGGGGCAGGAGCAGGAGGGGCAGGAGCAGGAGGGGCAGGAGCAGGAGGGGCAGGAGCAGGAGGGGCAGGAG                              | 8 |





|                     |          |                                                                                                                           |    |
|---------------------|----------|---------------------------------------------------------------------------------------------------------------------------|----|
| AG876-142920-143040 | 77571485 | GGTTCGGGCCCTGGAGCTCGGGGGCGGCCGGGTGGCCACCAGGGTCCGCTGGGTCCGCTGCCCGCTCCGGCGGGGGGGTGGCCGGGTGCAGCCGGGTCCGGGGTTCGGCCCTGGAGC     | 12 |
| AG876-142950-143070 | 77744250 | GGGTGGCCACCAGGGTCCGCTGGGTCCGCTGCCCGCTCCGGCGGGGGGGTGGCCGGGTGCAGCCGGGTCCGGGGTTCGGCCCTGGAGCTCGGGGGCGGCCGGGTGGCCACCAGGGTCC    | 12 |
| AG876-142980-143100 | 77917015 | GCCCCGCTCCGGCGGGGGGGTGGCCGGGTGCAGCCGGGTCCGGGGTTCGGCCCTGGAGCTCGGGGGCGGCCGGGTGGCCACCAGGGTCCGCTGGGTCCGCTGCCCGCTCCGGCGGGG     | 16 |
| AG876-143010-143130 | 78089780 | CAGCCGGGTCCGGGGTTCGGCCCTGGAGCTCGGGGGCGGCCGGGTGGCCACCAGGGTCCGCTGGGTCCGCTGCCCGCTCCGGCGGGGGGGTGGCCGGGTGCAGCCGGGTCCGGGGTTC    | 12 |
| AG876-143040-143160 | 78262545 | TCGGGGGGCGGCCGGGTGGCCACCAGGGTCCGCTGGGTCCGCTGCCCGCTCCGGCGGGGGGGTGGCCGGGTGCAGCCGGGTCCGGGGTTCGGCCCTGGAGCTCGGGGGCGGCCGGT      | 12 |
| AG876-143070-143190 | 78435310 | CGTGGTCCGCTGCCCGCTCCGGCGGGGGTGGCCGGGTGCAGCCGGTCCGGGGTTCGGCCCTGGAGCTCGGGGGCGGCCGGGTGGCCACCAGGGTCCGCTGGGTCCGCTGCC           | 12 |
| AG876-143100-143220 | 78608075 | GGGTGGCCGGGTGCAGCCGGTCCGGGGTTCGGCCCTGGAGCTCGGGGGCGGCCGGGTGGCCACCAGGGTCCGCTGGGTCCGCTGCCCGCTCCGGCGGGGGGGTGGCCGGGTGCAGC      | 12 |
| AG876-143130-143250 | 78780840 | CCGGCCCTGGAGCTCGGGGGCGGCCGGTGGCCACCAGGGTCCGCTGGGTCCGCTGCCCGCTCCGGCGGGGGGGTGGCCGGGTGCAGCCGGGTCCGGGGTTCGGCCCTGGAGCTCGG      | 12 |
| AG876-143160-143280 | 78953605 | GGCCACCAGGGTCCGCTGGGTCCGCTGCCCGCTCCGGCGGGGGGGTGGCCGGGTGCAGCCGGGTCCGGGGTTCGGCCCTGGAGCTCGGGGGCGGCCGGGTGGCCACCAGGGTCCGCT     | 12 |
| AG876-143190-143310 | 79126370 | CGCTCCGGCGGGGGGGTGGCCGGGTGCAGCCGGTCCGGGGTTCGGCCCTGGAGCTCGGGGGCGGCCGGGTGGCCACCAGGGTCCGCTGGGTCCGCTGCCCGCTCCGGCGGGGGGGT      | 12 |
| AG876-143220-143340 | 79299135 | CGGGTCCGGGGTTCGGCCCTGGAGCTCGGGGGCGGCCGGTGGCCACCAGGGTCCGCTGGTCCGCTGCCCGCTCCGGCGGGGGGGTGGCCGGGTGCAGCCGGTCCGGGGTTCGGG        | 12 |
| AG876-143250-143370 | 79471900 | GGGGCGCCGGGTGGCCACCAGGGTCCGCTGGGTCCGCTGCCCGCTCCGGCGGGGGGGTGGCCGGGTGCAGCCGGGTCCGGGGTTCGGCCCTGGAGCTCGGGGGCGGCCGGTGGCC       | 16 |
| AG876-143280-143400 | 79644665 | GGTCCGCTGCCCGCTCCGGCGGGGGGGTGGCCGGGTGCAGCCGGTCCGGGGTTCGGCCCTGGAGCTCGGGGGCGGCCGGTGGCCACCAGGGTCCGCTGGGTCCGCTGCCCGCT         | 12 |
| AG876-143310-143430 | 79817430 | GGCCGGTGCAGCCGGTCCGGGGTTCGGCCCTGGAGCTCGGGGGCGGCCGGTGGCCACCAGGGTCCGCTGGTCCGCTGCCCGCTCCGGCGGGGGGGTGGCCGGGTGCAGCCGGG         | 12 |
| AG876-143340-143460 | 79990195 | CCCTGGAGCTCGGGGGCGGCCGGTGGCCACCAGGGTCCGCTGGTCCGCTGCCCGCTCCGGCGGGGGGGTGGCCGGGTGCAGCCGGGTCCGGGGTTCGGCCCTGGAGCTCGGGGGG       | 12 |
| AG876-143370-143490 | 80162960 | CACCGGTCCGCTGGTCCGCTGCCCGCTCCGGCGGGGGGGTGGCCGGGTGCAGCCGGTCCGGGGTTCGGCCCTGGAGCTCGGGGGCGGCCGGTGGCCACCAGGGTCCGCTGGT          | 12 |
| AG876-143400-143520 | 80335725 | CCGGCGGGGGGGTGGCCACCAGGGTCCGCTGGGTCCGCTGCCCGCTCCGGCGGGGGGGTGGCCGGGTGCAGCCGGTCCGGGGTTCGGCCCTGGAGCTCGGGGGCGGCCGGTGGCC       | 16 |
| AG876-143430-143550 | 80508490 | TCCGGGGTTCGGCCCTGGAGCTCGGGGGCGGCCGGTGGCCACCAGGGTCCGCTGGTCCGCTGCCCGCTCCGGCGGGGGGGTGGCCGGGTGCAGCCGGTCCGGGGTTCGGCCCT         | 12 |
| AG876-143460-143580 | 80681255 | CGCCGGGTGGCCACCAGGGTCCGCTGGTCCGCTGCCCGCTCCGGCGGGGGGGTGGCCGGGTGCAGCCGGTCCGGGGTTCGGCCCTGGAGCTCGGGGGCGGCCGGTGGCCACC          | 12 |
| AG876-143490-143610 | 80854020 | CCGCTGCCCGCTCCGGCGGGGGGGTGGCCGGGTGCAGCCGGTCCGGGGTTCGGCCCTGGAGCTCGGGGGCGGCCGGTGGCCACCAGGGTCCGCTGGTCCGCTGCCCGCTCCGG         | 12 |
| AG876-143520-143640 | 81026785 | GGTGCAGCCGGTCCGGGGTTCGGCCCTGGAGCTCGGGGGCGGCCGGTGGCCACCAGGGTCCGCTGGTCCGCTGCCCGCTCCGGCGGGGGGGTGGCCGGGTGCAGCCGGTCCG          | 12 |
| AG876-143550-143670 | 81199550 | GGAGCTCGGGGGCGGCCGGTGGCCACCAGGGTCCGCTGGTCCGCTGCCCGCTCCGGCGGGGGGGTGGCCGGGTGCAGCCGGTCCGGGGTTCGGCCCTGGAGCTCGGGGGCGGCCGGTGGCC | 12 |
| AG876-143580-143700 | 81372315 | GGTCCGCTGGTCCGCTGCCCGCTCCGGCGGGGGGGTGGCCGGGTGCAGCCGGTCCGGGGTTCGGCCCTGGAGCTCGGGGGCGGCCGGTGGCCACCAGGGTCCGCTGGTCCG           | 12 |
| AG876-143610-143730 | 81545080 | CGGGGGGGTGGCCGGTGCAGCCGGTCCGGGGTTCGGCCCTGGAGCTCGGGGGCGGCCGGTGGCCACCAGGGTCCGCTGGTCCGCTGCCCGCTCCGGCGGGGGGGTGGCCGGT          | 12 |
| AG876-143640-143760 | 81717845 | GGTTCCGGCCCTGGAGCTCGGGGGCGGCCGGTGGCCACCAGGGTCCGCTGGTCCGCTGCCCGCTCCGGCGGGGGGGTGGCCGGGTGCAGCCGGTCCGGGGTTCGGCCCTGGAG         | 12 |
| AG876-143670-143790 | 81890610 | CGGGTGGCCACCAGGGTCCGCTGGTCCGCTGCCCGCTCCGGCGGGGGGGTGGCCGGGTGCAGCCGGTCCGGGGTTCGGCCCTGGAGCTCGGGGGCGGCCGGTGGCCACCAGGGT        | 12 |
| AG876-143700-143820 | 82063375 | TGCCCGCTCCGGGGGGGGTGGCCGGTGCAGCCGGTCCGGGGTTCGGCCCTGGAGCTCGGGGGCGGCCGGTGGCCACCAGGGTCCGCTGGTCCGCTGCCCGCTCCGGCGGGG           | 12 |
| AG876-143730-143850 | 82236140 | GCAGCCGGTCCGGGGTTCGGCCCTGGAGCTCGGGGGCGGCCGGTGGCCACCAGGGTCCGCTGGTCCGCTGCCCGCTCCGGCGGGGGGGTGGCCGGGTGCAGCCGGTCCGGGGTTC       | 12 |
| AG876-143760-143880 | 82408905 | CTCGGGGGCGGCCGGTGGCCACCAGGGTCCGCTGGTCCGCTGCCCGCTCCGGCGGGGGGGTGGCCGGGTGCAGCCGGTCCGGGGTTCGGCCCTGGAGCTCGGGGGCGGCCGGG         | 16 |
| AG876-143790-143910 | 82581670 | CCGCTGGTCCGCTGCCCGCTCCGGCGGGGGGGTGGCCGGGTGCAGCCGGTCCGGGGTTCGGCCCTGGAGCTCGGGGGCGGCCGGTGGCCACCAGGGTCCGCTGGTCCGCTGCC         | 12 |
| AG876-143820-143940 | 82754435 | GGGGTGGCCGGTGCAGCCGGTCCGGGGTTCGGCCCTGGAGCTCGGGGGCGGCCGGTGGCCACCAGGGTCCGCTGGTCCGCTGCCCGCTCCGGCGGGGGGGTGGCCGGTGCAG          | 12 |
| AG876-143850-143970 | 82927200 | TCCGCCCTGGAGCTCGGGGGCGGCCGGTGGCCACCAGGGTCCGCTGGTCCGCTGCCCGCTCCGGCGGGGGGGTGGCCGGGTGCAGCCGGTCCGGGGTTCGGCCCTGGAGCTCG         | 12 |
| AG876-143880-144000 | 83099965 | TGGCCACCAGGGTCCGCTGGTCCGCTGCCCGCTCCGGCGGGGGGGTGGCCGGGTGCAGCCGGTCCGGGGTTCGGCCCTGGAGCTCGGGGGCGGCCGGTGGCCACCAGGGTCCG         | 12 |
| AG876-143910-144030 | 83272730 | CCGCTCCGGCGGGGGGGTGGCCGGTGCAGCCGGTCCGGGGTTCGGCCCTGGAGCTCGGGGGCGGCCGGTGGCCACCAGGGTCCGCTGGTCCGCTGCCCGCTCCGGCGGGGGGG         | 16 |
| AG876-143940-144060 | 83445495 | CCGGTCCGGGGTTCGGCCCTGGAGCTCGGGGGCGGCCGGTGGCCACCAGGGTCCGCTGGTCCGCTGCCCGCTCCGGCGGGGGGGTGGCCGGGTGCAGCCGGTCCGGGGTTCGG         | 12 |
| AG876-143970-144090 | 83618260 | GGGGCGGCCGGTGGCCACCAGGGTCCGCTGGTCCGCTGCCCGCTCCGGCGGGGGGGTGGCCGGGTGCAGCCGGTCCGGGGTTCGGCCCTGGAGCTCGGGGGCGGCCGGTGGC          | 16 |
| AG876-144000-144120 | 83791025 | TGGTCCGCTGCCCGCTCCGGCGGGGGGGTGGCCGGTGCAGCCGGTCCGGGGTTCGGCCCTGGAGCTCGGGGGCGGCCGGTGGCCACCAGGGTCCGCTGGTCCGCTGCCCGC           | 12 |
| AG876-144030-144150 | 83963790 | TGGCCGGTGCAGCCGGTCCGGGGTTCGGCCCTGGAGCTCGGGGGCGGCCGGTGGCCACCAGGGTCCGCTGGTCCGCTGCCCGCTCCGGCGGGGGGGTGGCCGGGTGCAGCCGG         | 12 |
| AG876-144060-144180 | 84136555 | GCCCTGGAGCTCGGGGGCGGCCGGTGGCCACCAGGGTCCGCTGGTCCGCTGCCCGCTCCGGCGGGGGGGTGGCCGGTGCAGCCGGTCCGGGGTTCGGCCCTGGAGCTCGGGGG         | 12 |
| AG876-144090-144210 | 84309320 | CCACCAGGGTCCGCTGGTCCGCTGCCCGCTCCGGCGGGGGGGTGGCCGGTGCAGCCGGTCCGGGGTTCGGCCCTGGAGCTCGGGGGCGGCCGGTGGCCACCAGGGTCCGCTGGG        | 12 |
| AG876-144120-144240 | 84482085 | TCCGGCGGGGGGGTGGCCGGTGCAGCCGGTCCGGGGTTCGGCCCTGGAGCTCGGGGGCGGCCGGTGGCCACCAGGGTCCGCTGGTCCGCTGCCCGCTCCGGCGGGGGGGTGGC         | 12 |
| AG876-144150-144270 | 84654850 | GTCCGGGGTTCGGCCCTGGAGCTCGGGGGCGGCCGGTGGCCACCAGGGTCCGCTGGTCCGCTGCCCGCTCCGGCGGGGGGGTGGCCGGTGCAGCCGGTCCGGGGTTCGGGCC          | 12 |
| AG876-144180-144300 | 84827615 | GCGCCGGTGGCCACCAGGGTCCGCTGGTCCGCTGCCCGCTCCGGCGGGGGGGTGGCCGGTGCAGCCGGTCCGGGGTTCGGCCCTGGAGCTCGGGGGCGGCCGGTGGCCACC           | 12 |
| AG876-144210-144330 | 85000380 | TCCGCTGCCCGCTCCGGCGGGGGGGTGGCCGGTGCAGCCGGTCCGGGGTTCGGCCCTGGAGCTCGGGGGCGGCCGGTGGCCACCAGGGTCCGCTGGTCCGCTGCCCGCTCCG          | 12 |
| AG876-144240-144360 | 85173145 | CGCTGCAGCCGGTCCGGGGTTCGGCCCTGGAGCTCGGGGGCGGCCGGTGGCCACCAGGGTCCGCTGGTCCGCTGCCCGCTCCGGCGGGGGGGTGGCCGGTGCAGCCGGTCC           | 12 |
| AG876-144270-144390 | 85345910 | TGGAGCTCGGGGGCGGCCGGTGGCCACCAGGGTCCGCTGGTCCGCTGCCCGCTCCGGCGGGGGGGTGGCCGGTGCAGCCGGTCCGGGGTTCGGCCCTGGAGCTCGGGGGCGG          | 12 |
| AG876-144300-144420 | 85518675 | CGGGTCCGCTGGTCCGCTGCCCGCTCCGGCGGGGGGGTGGCCGGTGCAGCCGGTCCGGGGTTCGGCCCTGGAGCTCGGGGGCGGCCGGTGGCCACCAGGGTCCGCTGGTCCG          | 12 |
| AG876-144330-144450 | 85691440 | GCGGGGGTGGCCGGTGCAGCCGGTCCGGGGTTCGGCCCTGGAGCTCGGGGGCGGCCGGTGGCCACCAGGGTCCGCTGGTCCGCTGCCCGCTCCGGCGGGGGGGTGGCCGGTGGCC       | 16 |
| AG876-144360-144480 | 85864205 | GGGGTTCGGCCCTGGAGCTCGGGGGCGGCCGGTGGCCACCAGGGTCCGCTGGTCCGCTGCCCGCTCCGGCGGGGGGGTGGCCGGTGCAGCCGGTCCGGGGTTCGGCCCTGGA          | 12 |
| AG876-144390-144510 | 86036970 | CCGGTGGCCACCAGGGTCCGCTGGTCCGCTGCCCGCTCCGGCGGGGGGGTGGCCGGTGCAGCCGGTCCGGGGTTCGGCCCTGGAGCTCGGGGGCGGCCGGTGGCCACCAGGG          | 12 |
| AG876-144420-144540 | 86209735 | CTGCCCGCTCCGGCGGGGGGGTGGCCGGTGCAGCCGGTCCGGGGTTCGGCCCTGGAGCTCGGGGGCGGCCGGTGGCCACCAGGGTCCGCTGGTCCGCTGCCCGCTCCGGCGG          | 12 |







|                   |         |                                                                                                                                |    |
|-------------------|---------|--------------------------------------------------------------------------------------------------------------------------------|----|
| Akata-7530-7650   | 171324  | CTACCCAAAGAGAGATTAGGGTAGTATATGCTATCCGAATCTCTATCTGGATAGCATATGCTACCCAATCTATATGCGGGTAGTACATGCTATCCTAAATCTATATTGGGGTAGTATATG       | 4  |
| Akata-7560-7680   | 342648  | CTATCCGAATCTCTATCTGGATAGCATATGCTACCCAATCTATATGCGGGTAGTACATGCTATCCTAAATCTATATCGGGTAGTATATGCTATCCTAAATCTCTATGTGGGTAGTACATG       | 4  |
| Akata-7590-7710   | 513972  | CTACCCAATCTATATGCGGGTAGTACATGCTATCCTAAATCTATATTGGGGTAGTATATGCTATCCTAAATCTCTATGTGGGTAGTACATGCTATCCTAAATCTCTATGTGGGTAGCATATG     | 4  |
| Akata-7620-7740   | 685296  | TATCCTAAATCTATATTGGGGTAGTATATGCTATCCTAAATCTCTATGTGGGTAGTACATGCTATCCTAAATCTCTATGTGGGTAGCATATGCTATCCTAAATCTATATCTGGGTAGCATATG    | 4  |
| Akata-7650-7770   | 856620  | CTATCCTAAATCTCTATGTGGGTAGTACATGCTATCCTAAATCTCTATGTGGGTAGCATATGCTATCCTAAATCTATATCTGGGTAGCATATGCTACCCAATAGAGATTAGGGTAGCATATG     | 4  |
| Akata-7680-7800   | 1027944 | CTATCCTAAATCTCTATGTGGGTAGCATATGCTATCCTAAATCTATCTGGGTAGCATATGCTACCCAATAGAGATTAGGGTAGCATATGCTATCCTAAATCTCTATCTGGATAGCATATG       | 4  |
| Akata-7710-7830   | 1199268 | CTATCCTAAATCTATATCTGGGTAGCATATGCTACCCAATAGAGATTAGGGTAGCATATGCTATCCTAAATCTCTATCTGGGTAGCATATGCTATCCTAAATCTATATCTGGGGTAGTACATG    | 4  |
| Akata-7740-7860   | 1370592 | CTACCCAATAGAGATTAGGGTAGCATATGCTATCCTAAATCTCTATCTGGATAGCATATGCTATCCTAAATCTATATGCGGGTAGTACATGCTATCCTAAATCTATATTGGGGTAGTATATG     | 4  |
| Akata-7770-7890   | 1541916 | CTATCCTAAATCTCTATCTGGATAGCATATGCTATCCTAAATCTATATGCGGGTAGTACATGCTATCCTAAATCTATATTGGGGTAGTATATGCTATCCTAAATCTCTATGTGGGTAGTACATG   | 4  |
| Akata-7800-7920   | 1713240 | CTATCCAATCTATATGCGGGTAGTACATGCTATCCTAAATCTATATTGGGGTAGTATATGCTATCCTAAATCTCTATGTGGGTAGTACATGCTATCCTAAATCTCTATGTGGGTAGCATATG     | 4  |
| Akata-7830-7950   | 1884564 | TATCCTAAATCTATATTGGGTAGTATATGCTATCCTAAATCTCTATGTGGGTAGTACATGCTATCCTAAATCTCTATGTGGGTAGCATATGCTATCCTAAATCTCTATGTGGGTAGCATATG     | 4  |
| Akata-7860-7980   | 2055888 | CTATCCTAAATCTCTATGTGGGTAGTACATGCTATCCTAAATCTCTATGTGGGTAGTACATGCTATCCTAAATCTCTATGTGGGTAGCATATGCTATCCTAAATCTCTATGTGGGTAGCATATG   | 4  |
| Akata-7890-8010   | 2227212 | CTATCCTAAATCTCTATGTGGGTAGCATATGCTATCCTAAATCTCTATCTGGATAGCATATGCTATCCTAAATCTATATGCGGGTAGTACATGCTATCCTAAATCTATATTGGGGTAGTATATG   | 4  |
| Akata-7920-8040   | 2398536 | CTATCCAACGCAACATTATCCACCGTCTCTCAGGACCTCGTGAATATGAGGACCAACAACTGTGCTTGGCGCTCAGGCGCAAGTGTGTAACTTGTCTCCAGATCGCAGCAAT               | 4  |
| Akata-10050-10170 | 2569860 | ATAGAAGCATACATGACAATAAAGCCAGGTGATAATCCATACCTGGGAAGCAGGAGATGGTGCATTTACCCCAACCCCTTTCCAGCTGCTATTTACAATAAAATGAAACCTTTT             | 4  |
| Akata-12630-12750 | 2741184 | CCAGACCCGGGTCTCGGCCAGCCGAGCCGACCCGCGCCGCGGGCCCTCTCGGGCCAGCCGCGGGGTTGGTTCTGCCCTCTCTGTCTTCCAGGAAACCCAGGACCTCGGG                  | 12 |
| Akata-13800-13920 | 2912508 | AGGCCATGCGCCCTGTCAACAGGCTGCCAAAGAGCCAGATCTAAGGCCAGGAGAGCCACCCAAAGCGGGTGCAGTAAACAGGTAATCTCTGGTAGTATTTGACCCGAAATCTGA             | 4  |
| Akata-13860-13980 | 3083832 | AGCCCAAGCCGGTGCAGTAAACAGGTAATCTCTGGTAGTATTGGACCCGAAATCTGACACTTTAGAGCTCTGGAGGACTTTAAAACCTCTAAAATCAAACCTTTAGAGGCGAATGGG          | 4  |
| Akata-13890-14010 | 3255156 | CTCTGGTAGTATTGGACCCGAAATCTGACACTTTAGAGCTCTGGAGGACTTTAAAACCTCTAAAATCAAACCTTTAGAGGCGAATGGGCGCAATTTTGTCCACGCGCCGATAATGG           | 4  |
| Akata-13920-14040 | 3426480 | CACITTAGAGCTCTGGAGGACTTTAAAACCTCTAAAATCAAACCTTTAGAGGCGAATGGGCGCAATTTTGTCCACGCGCCGATAATGGCGGACCTAGGCTAAAACCCAGGAAAGCG           | 4  |
| Akata-13950-14070 | 3597804 | CTAAAATCAAACCTTTAGAGGCGAATGGGCGCAATTTTGTCCACGCGCCGATAATGGGCGACCTAGGCTAAAACCCAGGAAAGCGGGTCTATGGTTGGCTGCGCTGCTGCTATCT            | 4  |
| Akata-15990-16110 | 3769128 | CGGAGGACCCCGCAGCCGCGCCGAGCCAGGCGGTTCTCGCCCTCCCGGGTCCAGAGCCAGGATGTCCCCAGAAGGACCCCTAGGGTCCCTCCCTCCAGG                            | 8  |
| Akata-16320-16440 | 3940452 | CTCTCCCTGCGCTCTCCTCCCGCTCCACCCGAGCCCTCAGCTTGCCTCCACCCGGTCCATCAGCCGCGCCGAGGACCCCGCGCGCCGGTGTGAGTCCCTCCGAGCCG                    | 12 |
| Akata-16680-16800 | 4111776 | ATAGACTCCATGTAAGCTGCTCAGTAGGTGCTCCAGAGCCCTTTTGCCTCCGCGCCAGCCGACCCCGGGCCGCCCCAACTTTGTCCAGATGTCAGGGTCCCGA                        | 8  |
| Akata-16740-16860 | 4283100 | GCGGCCAGCCGACCCCGCGCCGCCCCAACTTTGTCCAGATGTCCAGGGTCCCGAGGGCGAGGCCAGCCCGCTCCACCCCTGTCCACTGCCCGGTCCCGCAGAACGCCCA                  | 12 |
| Akata-17700-17820 | 4454424 | CGGTCCCGAGTCTACCAGAGGGGGCAAGCCAGACGAGTCCGTAAGAGGGTCCGTCAGCAAGAAGAGGAGGTTGTAAGCGGTTACCTTCAGGGGTAAGTAACTGACCTCT                  | 4  |
| Akata-17730-17850 | 4625748 | GAACCCAGACGAGTCCGTAGAAGGGTCTCTGTCAGCAAGAAGAGGAGGTTGTAAGCGGTTACCTTCAGGGGTAAGTAACTGACCTTCAGGGTCCAGTAAAGGAGGCTTAGTAT              | 4  |
| Akata-18300-18420 | 4797072 | TCTCTGGTAACGACGAGAGAAGAGTAGAGCCCGCGCCATTTGGCCAGATTGAGAGCCAGTCCAGGGCCGCGCCAGAGCCGTTCTGAGACCTCCGCGCCGAGCCGCGCCCT                 | 8  |
| Akata-18330-18450 | 4968396 | GCCCGCGCCATTGGGCCAGATTGAGAGACCAGTCCAGGGCCGAGGTTGGAGCCAGCGGGCACCCGAGGTCAGCAGCCCGTCCCTCCGGGGGAGAGACAGGACAGGCGCCCGG               | 8  |
| Akata-18360-18480 | 5139720 | CCAGTCCAGGGCCCGAGGTTGGAGCCAGCGGGCACCCGAGGTCAGCAGCCCGTCCCTCCGGGGGAGAGACAGGACAGGCGCCCGGCGAGCTGGCCCGAGGAGCGCCCGGAGTG              | 12 |
| Akata-18960-19080 | 5311044 | GTTAAACCCAAAGAAATGCTGAGGGGAGCCACCCTCGGGGCCAGGCCCCAGAGTCCAGAGGTCAGGGGCACCTCAGGGTGCCTCCCGGGTCCAGGCCAGCCGAGGGACCCCGGAG            | 8  |
| Akata-18990-19110 | 5482368 | ACCCTCGGGCCAGGCCAGAGTCCAGAGGTCAGGGCACCTCAGGTTGCCTCCCGGGTCCAGGCCAGCCGAGGACCCCGCAGCCCGGGCGCCAGAGCCGTTCTCTCGC                     | 12 |
| Akata-19020-19140 | 5653692 | GGTCAGGGCACCTCAGGTTGCCTCCCGGGTCCAGGCCAGCCGAGGACCCCGCAGCCGCGCCGAGGCGGTTCTCGCCCTCCCGGGTCCAGGCCAGGATGT                            | 12 |
| Akata-19740-19860 | 5825016 | GGCCTGGCTCCCATAGACTCCCATGTAAGCTGCCTCGAGTAGGTGCCTCCAGAGCCCTTTTGCCTCCGCGCCAGCCGACCCCGGGCGCCCAAACTTTGTCCAGATGTC                   | 8  |
| Akata-19830-19950 | 5996340 | CCGGGCGCCCAAACTTTGTCCAGATGTCAGGGTCCCGAGGGGAGGCCAGCCCTCCACCCCTGTCCACTGCCCGGTCCCGCCAGAAGCCCAAAAGTAGAGGCTCAGGC                    | 8  |
| Akata-19860-19980 | 6167664 | CAGGGTCCCGAGGGCGAGGCCAGCCCTCCACCCCTGTCCACTGCCCGGTCCCGCCAGAAGCCCAAAAGTAGAGGCTCAGGCCATGCGCGCCCTGTCAACAGCCCTGCCAAA                | 8  |
| Akata-20520-20640 | 6338988 | TTTTCCCTTCCCTCCCTGCTTGGCTGCGCCGGGGCCACCTTCATCACCTGCTGACTCCGCCATCAAGCCTAGGGGAGCCGAAGTGAAGTCCCTGGACAGCCCGGCCGG                   | 8  |
| Akata-21660-21780 | 6510312 | GGAGGCAGAGGTCGGCTAGGCCCGGGGAAGTGGAGGGGATCGCCCGGTCTCTGTTGGCAGAGTCCGGGCGATCTCTGAGACCTCCGCGCCGAGCCGCGCCCTCAGCCGCCA                | 8  |
| Akata-23010-23130 | 6681636 | TAGAGGCTCAGGCCATGCGCGCCCTGTCAACAGGCTGCCAAAGAGCCAGATCTAAGGCCAGGAGAGGCCAGCCCAAGCGGGTGCAGTAAACAGGTAATCTCTGGTAGTATTGGACCC          | 4  |
| Akata-23040-23160 | 6852960 | CAGGCTGCCAAAGAGCCAGATCTAAGGCCAGGAGAGGCCAGCCCAAGCGGGTGCAGTAAACAGGTAATCTCTGGTAGTATTGGACCCGAAATCTGACACTTTAGAGCTCTGGAGGAC          | 4  |
| Akata-23070-23190 | 7024284 | AGGAGAGGAGCCCAAGCGGGTGCAGTAAACAGGTAATCTCTGGTAGTATTGGACCCGAAATCTGACACTTTAGAGCTCTGGAGGACTTTAAAACCTCTAAAATCAAACCTTTAGAG           | 4  |
| Akata-23100-23220 | 7195608 | ACAGGTAATCTCTGGTAGTATTGGACCCGAAATCTGACACTTTAGAGCTCTGGAGGACTTTAAAACCTCTAAAATCAAACCTTTAGAGGCGAATGGGCGCAATTTTGTCCACGCGC           | 4  |
| Akata-23640-23760 | 7366932 | CATCACCTGCGTACTCCGCCATCAAGCCTAGGGGAGACGGAAGTGAAGTCCCTGAGCACCGCCGCGCCCGGATCCGGCCAGAGGTAAGTGGACTTTAATTTTTCTG                     | 4  |
| Akata-23670-23790 | 7538256 | CTAGGGGAGACCGAAGTGAAGTCCCTGAGCCAGCCCGCCGCGCCCGGATCGGGCCAGAGGTAAGTGGACTTTAATTTTTCTGTAAGCCCAACACTCCACCACACCCAGGCAC               | 4  |
| Akata-25980-26100 | 7709580 | GCGCCCCAACTTTGTCCAGATGTCAGGGTCCCGAGGGGAGGCCAGCCCTCCACCCCTGTCCACTGCCCGGTCCCGCCAGAAGCCCAAAAGTAGAGGCTCAGGCCATG                    | 8  |
| Akata-27930-28050 | 7880904 | GACCCAGGGTCTCCAGGAGGTCGGCATCTCCAGGGGAGAGGCTCACCACACAGGCCCCCGAGCCCGGGTCTCGGGCAGCCGAGCCAGCCCGCCCGCCGCGCGCCCTCCTC                 | 12 |
| Akata-29100-29220 | 8052228 | CCAGCCCTCCACCCCTGTCCACTCCCGCTCCCGCCGAGGACCCCAAGGCTAGAGGCTCAGGCCATGCGCCCTGTCCAGGCTCCCAAGAGCCAGATCTAAGGCCAGGA                    | 8  |
| Akata-29760-29880 | 8223552 | TCTTGCCCTGGCCCGGGGACCTTCACTACCTGCTGACTCGCCATCAAGCTTAGGGAGACCGCAAGTGCAGTCCCTGGACCGCCGCGCCCGGATCCGGCCAGAGGTAAGTGGACTTTAATTTTTCTG | 8  |
| Akata-30540-30660 | 8394876 | AGGCCACTTAGACCCGGCCAGCCCTCCCTGAGACCCAGCCAGCCGCTTCTCTGTAACGACGAGAGAAGAAGTAGAGCCCGCCGCGCCATTGGGCCAGATTGAGAGACCCAGTCCA            | 4  |
| Akata-30570-30690 | 8566200 | CCTGAAGACCCAGCGCCATTCTCTCTGTAACGAGCAGAGAAGAAGTAGAGCCCGCGCCATTGGGCCAGATTGAGAGACCAAGTCCAGGGCCCGAGGTTGGAGCCAGCCGCGCACCC           | 4  |
| Akata-31170-31290 | 8737524 | GGAACAGGGACCTCGGCCACCCAGAGCCCTCGGGCCGCTCCAGGCGCCCTCTGGTCTCCGCTCCCTCTTAGCCCGTAAACCCAAAGAAATGTCTGAGGGAGCCACCCCTCGG               | 8  |

|                     |          |                                                                                                                       |    |
|---------------------|----------|-----------------------------------------------------------------------------------------------------------------------|----|
| Akata-31200-31320   | 8908848  | CCTCGGGGCCCGCTCCAGGGCCCTCTGGTCTCCGCTCCCTCTTACGCCGTTAAACCCAAGAATGTCTGAGGGGAGCCACCTCGGGGCCAGGCCAGAGTCCAGAGGTACGGG       | 8  |
| Akata-32580-32700   | 9080172  | CCCAAGGGGGTTGCGGTTGCTAGGCCACCTTCTCAGTCCAGCGGTTTACGTAAGCCAGACAGCAGCCAAATTGTCAGTTCTAGGAGGGGGGACCTGCCCTGGTATAAAGTGGTCTG  | 4  |
| Akata-33420-33540   | 9251496  | GCCAGACGCTGGGCTCTAAGGCCCTCGGGTCCCTTGACCCCGGCTCAGCAACCTGCTGCTCCCTCTGCCACCCAGCCTCCCCCTCCCCGTCCTGCTGATCC                 | 8  |
| Akata-33450-33570   | 9422820  | GTCCCGCTGGACCCCGGCTCAGCAACCTGCTGCTCCCTCTGCCACCCAGCCTCCCCCTCCCGTCCCTCTGCTCCTGATCCTCCCCGGTCCCCAGTAGGGCCGCCTGCC          | 12 |
| Akata-34080-34200   | 9594144  | CCCAGGGTCTCCAGGCAGGTCCGGCATCTCCAGGGGCAGCAGCTCACCACCAGACGCCCCAGACCCGGGCTCTGGCCAGCCAGCCAGCCGCCCGCCGCGCCGCTCCTCGGG       | 12 |
| Akata-34110-34230   | 9765468  | CCAGGGGCAGCAGGCTACCCACACAGCCCGCCAGCCGGGCTCCGGCCAGCCGACCCGCGCCGCGGCGGCTCTGGGGCCAGCCGCGGCTTGGTTCGCCCTCT                 | 12 |
| Akata-34140-34260   | 9936792  | CCCCAGACCCGGGTTCTCGGCCAGCCGAGCCAGCCGCCCGCCGCGCCGCTCCTGCAGCTGCGAGGTCGGGCTGGTTCGTTCTGCCCTCTCTGTCTCTCAGAGAACCCAGGCTCG    | 12 |
| Akata-37170-37290   | 10108116 | GCAGGGGCAGGGGCAAGGGCAAGTCCAGGGACAAGCAAGCCCGGTGGACCATGGAGACCAGAGCCAAACACCTCCAGTCTAGCATGCCTGAACCTAAGTCCAGTCTCGGCTTC     | 4  |
| Akata-39600-39720   | 10279440 | CCGGGGCAGCAGGGCCGCGCGGTGGGTCCGCTGGGCCGCTGCCCGCTCCGGGTGGGGGTGGCCCCGCTGGACACCGCTGCGCCGCCAGGTCCTGGGGCAGCCGGGTCTCTG       | 12 |
| Akata-39630-39750   | 10450764 | CCGCTGGGGCGCTGCCCGCTCCGGGTGGGGGTGGCCCGCTGGACACCGCTGCGCCGCCAGGTCCTGGGGCAGCCGGGTTCTGGCGCTCCACTGCACCTGGAATCAGAGGTGG      | 12 |
| Akata-39660-39780   | 10622088 | GGGTGGCCCGCTGGACACCGCTGCCCGCCGCGAGTCTGGGGCAGCCGGGTTCTTCGGCTCCACTGCACCTGGAATCAGAGGTGGGGCGTGGTCCCTGGACCCAGCCCGCC        | 12 |
| Akata-39690-39810   | 10793412 | CGCCAGTCTGGGGCAGCCGGGTTCTCGGCCAGCCGCTCCAGGCTGCGAGTGGGGGTGGGGGTGGGCTGGACCCAGCCCGCCAGTCCCTCCCCAGGGGCTACCCGCTTGC         | 8  |
| Akata-40590-40710   | 10964736 | GGGGCTAGAGTCCGCGAGATTGGGGTAGGCGGAGCTCAAGAGGTTCCCTCCATAGGTTTAAACCATGAGGGGGAGGATTGGGCTCCGCTGATACCTAGTGGGTGGAGCTAG       | 4  |
| Akata-40620-40740   | 11136060 | GCGGAGCCTAAGAGGGTCCCTCCATAGGGTTAAACCATGAGGGGGAGGATTGGGCTCCGCTGATATACCTAGTGGGTGGAGCTAGAGGTAGGTATCCATAGGGTTCATTATCCT    | 4  |
| Akata-40650-40770   | 11307384 | GTTTAAACCATGAGGGGGAGGATTGGGCTCCGCTGATATACCTAGTGGGTGGAGCTAGAGGTAGGTATCCATAGGGTTCCATTATCCTGGAGGTATCCTAAGCTCCGCCCTATATAC | 4  |
| Akata-40680-40800   | 11478708 | GCCCTGATACCTAGTGGGTGGAGCTAGAGGTAGGTATCCATAGGGTTCATTATCCTGGAGGTATCCTAAGCTCCGCCCTATATACCAGTGGGTGGAGCTAGGTAGGATTACAGT    | 4  |
| Akata-40800-40920   | 11650032 | AGGTTCTACTGGGGTACCCCTACCTACCTAAGTGGCCACCCTTCTCCTTCGTTTAAATGGTAGAATAACCTATAGGTTTAAACCTAGTGGTGGAAAGGTTATGACAGT          | 4  |
| Akata-40830-40950   | 11821356 | CCTAAGTGGCGCCACCCTTCTCCTCCGTTTAAATGGTAGAATAACCTATAGGTTTAAACCTAGTGGTGGAAAGGTTATGACAGTGGGTATATACCTATAGGTATAGAACCCTA     | 4  |
| Akata-40860-40980   | 11992680 | TTTTAATGGTAGAATAACCTATAGGTTTAAACCTAGTGGTGGAAAGGTTATGACAGTGGGTATATACCTATAGGTATATAGAACCCTAGAGGAAGGAAACCTATAGTGAATCCCTC  | 4  |
| Akata-59310-59430   | 12164004 | GTATGCTCCTCTCCTCCTCCTCCTCCTCCCGCAGCCCTGAGATCTGCTCCCTCCCTCCTCCTCGTCTGGTGGAAAAGTCTGAGGAGGAAAAGGAGAAATGGGGAGGAGTCCAA     | 4  |
| Akata-77640-77760   | 12335328 | TGGATTGAAGTGGGCTCAGTGCATGGAAGAGGTTGAAGTTGAAGTTCTGTTATGTTGGCCTGTGGTAAACACTGTTGGTTCATTTTTGGTGGGCTGGTAACTACTGGGGTGGGACT  | 4  |
| Akata-77670-77790   | 12506652 | AGAGGTGAAGTTGAAGTTCTGTTATGTTGGCTGTGGTAACATCACTGGTTCATTTTTGGTGGGCTGGTAACTGGGTTGGACTTCTCCTAAGGTGTGGTGGGACT              | 4  |
| Akata-87960-88080   | 12677976 | GCCCCCGGGCTCCATACCAGGATACCAGGACCCCGGCCGCCCGGGCTCCATACCAGGATACCAGGAGCCCGCGCCCGCCAGCTCCATACCAGGATACCAGGAGCCCGCGCC       | 8  |
| Akata-87990-88110   | 12849300 | GAGCCCGCGCCCGGGCTCCATACCAGGATACCAGGAGCCCGCGCCCGCCAGGCTCCATACCAGGATACCAGGAGCCCGCGCCCGCCAGGCTCCATACCAGGATACCAGGAG       | 8  |
| Akata-88020-88140   | 13020624 | GGATACCAGGAGCCCGCGCCCGCCAGGCTCCATACCAGGATACCAGGAGCCCGCGCCCGCCAGGCTCCATACCAGGATACCAGGAGCCCGCGCCCGCCAGGCTCCATACCAGGGA   | 8  |
| Akata-88050-88170   | 13191948 | CCATACCAGGATACCAGGAGCCCGCGCCCGCCAGGCTCCATACCAGGATACCAGGAGCCCGCGCCCGCCAGGCTCCATACCAGGATACCAGGAGCCCGCGCCCGGGTCCAA       | 8  |
| Akata-96000-96120   | 13363272 | GAGCAGGAGGGGAGGAGCAGGAGGGGAGGAGGGGAGGAGCAGGAGGGGCGGAGCAGGAGGGGCGGAGCAGGAGGGGCGGAGCAGGAGGGGCGGAGGAGGGGCGGGAG           | 12 |
| Akata-96030-96150   | 13534596 | GAGGGCAGGAGCAGGAGGGGCGGAGCAGGAGGGGAGGAGGGGAGGAGGGGCGGAGCAGGAGGGGCGGAGGAGGGGCGGAGGAGGGGCGGAGGAGGGGCGGAGGAGG            | 12 |
| Akata-96060-96180   | 13705920 | GAGGGCAGGAGGGGAGGAGCAGGAGGGGCGGAGCAGGAGGGGAGGAGGGGCGGAGCAGGAGGGGCGGAGGAGGGGCGGAGGAGGGGCGGAGGAGGGGCGGAGGAGG            | 12 |
| Akata-96090-96210   | 13877244 | CGGGAGCAGGAGGGGAGGAGGGGCGGAGCAGGAGGGGCGGAGCAGGAGGGGCGGAGCAGGAGGGGCGGAGGAGGGGCGGAGGAGGGGCGGAGGAGGGGCGGAGGAGG           | 12 |
| Akata-96120-96240   | 14048568 | CAGGAGGGGAGGAGGGGAGGAGCAGGAGGGGCGGAGCAGGAGGGGCGGAGGAGGGGCGGAGGAGGGGCGGAGGAGGGGCGGAGGAGGGGCGGAGGAGGGGCGGAGGAGG         | 8  |
| Akata-96150-96270   | 14219892 | GGCAGGAGGGGAGGAGGGGAGGAGGGGCGGAGGAGGGGCGGAGGAGGGGCGGAGGAGGGGCGGAGGAGGGGCGGAGGAGGGGCGGAGGAGGGGCGGAGGAGGGG              | 8  |
| Akata-125700-125820 | 14391216 | GGCACCAGGAGCTGTCCGCTATGTCAGAAAGCATGGAGGGCAGACGGATGTCAGTCCGGCCCGGACCCCGCCCGGAGGCTGGTGGCCCTCTCGGAAGGGAAGATGGGGCACCTA    | 8  |
| Akata-125730-125850 | 14562540 | GAAGCCATGGAGGGCAGACGGATGTGAGGTCGGGCCCGGACCCCGCCCGGAGGCTGGTGGCCCTCTCGGAAGGGAAGATGGGGCACCTAAGGACCCCTCTGGACCGTTTGGACACC  | 8  |
| Akata-140520-140640 | 14733864 | GAGCTCGGGGGGCGCGGGTGGCCACCGGTTCCGCTGGGTCGCTGCCCGCTCCGGCGGGGTTGCGGCTGACAGCCGGTCCGGGTTCCGGCCCTGGAGCTCGGGGGCGGGCGG       | 12 |
| Akata-140550-140670 | 14905188 | GGTCCGCTGGGTCGCTGCCCGCTCCGGCGGGGGTGGCCGCTCAGCCGGTCCGGGTTCCGGCCCTGGAGCTCGGGGGCGGGCGGGTGGCCACCGGGTCCGCTGGTCCGCTG        | 12 |
| Akata-140580-140700 | 15076512 | GGGGGTGGCCGCTGCAGCCGGTCCGGGTTCCGGCCCTGAGCTCGGGGGCGGGGGTGGCCACCGGGTCCGCTGGTCCGCTGCCCGCTCCGGCGGGGGTGGCCGGCTGCA          | 12 |
| Akata-140610-140730 | 15247836 | GTTCCGGCCCTGGAGCTCGGGGGCGGGGGTGGCCACCGGGTCCGCTGGTCCGCTGCCCGCTCCGGCGGGGGTGGCCGGTCCGCTGGGTTCCGGCCCTGGAGCTCGGGGGCGGGG    | 12 |
| Akata-140640-140760 | 15419160 | GGTGGCCACCAGGTCGCTGGTCCGCTGCCCGCTCCGGCGGGGGTGGCCGCTCAGCCGGTCCGGGTTCCGGCCCTGGAGCTCGGGGGCGGGCGGGTGGCCACCAGGTTCCG        | 12 |
| Akata-140670-140790 | 15590484 | CCCCGCTCCGGCGGGGGTGGCCGCTCAGCCGGTCCGGGTTCCGGCCCTGGAGCTCGGGGGCGGGCGGGTGGCCACCAGGGTCCGCTGGTCCGCTGCCCGCTCCGGCGGGGG       | 16 |
| Akata-140700-140820 | 15761808 | GCCGGTCCGGGTCCGGCCCTGGAAGCTCGGGGGCGGGCGGGTGGCCACCAGGGTCCGCTGGTCCGCTGCCCGCTCCGGCGGGGGTGGCCGGCTCAGCCGGTCCGGGTTCCG       | 12 |
| Akata-140730-140850 | 15933132 | GGGGGGCGGGGGTGGCCACCAGGGTCCGCTGGTCCGCTGCCCGCTCCGGCGGGGGTGGCCGGTCCAGCCGGTCCGGGTTCCGGCCCTGGAGCTCGGGGGCGGGCGGGTGGC       | 16 |
| Akata-140760-140880 | 16104456 | CTGGTCCGCTGCCCGCTCCGGCGGGGGTGGCCGCTCAGCCGGTCCGGGTTCCGGCCCTGGAGCTCGGGGGCGGGCGGGTGGCCACCAGGGTCCGCTGGTCCGCTGCCCGC        | 12 |
| Akata-140790-140910 | 16275780 | TGGCCGCTCAGCCGGTCCGGGTTCCGGCCCTGGAGCTCGGGGGCGGGCGGGTGGCCACCAGGGTCCGCTGGTCCGCTGCCCGCTCCGGCGGGGGTGGCCGGTCCGCGGTTCCG     | 12 |
| Akata-141060-141180 | 16447104 | GGTCCGCTGGTCCGCTGCCCGCTCCGGCGGGGGTGGCCGCTCAGCCGGTCCGGGTTCCGGCCCTGGAGCTCGGGGGCGGGCGGGTGGCCACCAGGGTCCGCTGGTCCGCTG       | 12 |
| Akata-141150-141270 | 16618428 | GGTGGCCACCAGGTCGCTGGTCCGCTGCCCGCTCCGGCGGGGGTGGCCGGTCCAGCCGGTCCGGGTTCCGGCCCTGGAGCTCGGGGGCGGGCGGGTGGCCACCAGGGTCCG       | 12 |
| Akata-141210-141330 | 16789752 | GCCGGTCCGGGTTCCGGCCCTGGAGCTCGGGGGCGGGCGGGTGGCCACCAGGGTCCGCTGGTCCGCTGCCCGCTCCGGCGGGGGTGGCCGGTCCGCGGTTCCG               | 12 |
| Akata-141240-141360 | 16961076 | GGGGGGCGGGGGTGGCCACCAGGGTCCGCTGGTCCGCTGCCCGCTCCGGGTTCCGGCCCTGGAGCTCGGGGGCGGGCGGGTGGCCACCAGGGTCCGCTGGTCCGCTGCCCGC      | 16 |
| Akata-141270-141390 | 17132400 | CTGGTCCGCTGCCCGCTCCGGCGGGGGTGGCCGCTCAGCCGGTCCGGGTTCCGGCCCTGGAGCTCGGGGGCGGGCGGGTGGCCACCAGGGTCCGCTGGTCCGCTGCCCGC        | 12 |
| Akata-141300-141420 | 17303724 | TGGCCGCTCAGCCGGTCCGGGTTCCGGCCCTGGAGCTCGGGGGCGGGCGGGTGGCCACCAGGGTCCGCTGGTCCGCTGCCCGCTCCGGCGGGGGTGGCCGGTCCAGCCGGTCCG    | 12 |
| Akata-141360-141480 | 17475048 | CCACCAGGTCGCTGGTCCGCTGCCCGCTCCGGCGGGGGTGGCCGCTCAGCCGGTCCGGGTTCCGGCCCTGGAGCTCGGGGGCGGGCGGGTGGCCACCAGGGTCCGCTGGT        | 12 |

|                     |          |                                                                                                                            |    |
|---------------------|----------|----------------------------------------------------------------------------------------------------------------------------|----|
| Akata-141390-141510 | 17646372 | TCCGGCGGGGGTGGCCGGCTGCAGCCGGTCCGGGGTCCGGCCCTGGAGCTCGGGGGGCGCCGGGTGCCACCAGGGTCCGCTGGTCCGCTGCCCGCTCCGGCGGGGGTGGCCG           | 12 |
| Akata-141570-141690 | 17817696 | GGTCCGCTGGGTCCGCTGCCCCCTCCGGCGGGGGTGGCCGGCTCAGCCGGTCCGGGGTCCGGCCCTGGAGCTCGGGGGGCGCCGGGTGCCACCAGGGTCCGCTGGTCCGCTG           | 12 |
| Akata-141600-141720 | 17989020 | GGGGGGTGGCCGGCTGCAGCCGGTCCGGGGTCCGGCCCTGGAGCTCGGGGGGCGCCGGGTGCCACCAGGGTCCGCTGGTCCGCTGCCCGCTCCGGCGGGGGTGGCCGGCTGCA          | 12 |
| Akata-141630-141750 | 18160344 | GTCCGGCCCTGGAGCTCGGGGGGCGCCGGGTGCCACCAGGGTCCGCTGGTCCGCTGCCCGCTCCGGCGGGGGTGGCCGGCTGCAGCCGGTCCGGGGTCCGGCCCTGGAGCTC           | 12 |
| Akata-141660-141780 | 18331668 | GGTGGCCACCAGGGTCCGCTGGGTCCGCTGCCCGCTCCGGCGGGGGTGGCCGGCTGCAGCCGGTCCGGGGTCCGGCCCTGGAGCTCGGGGGGCGCCGGGTGCCACCAGGGTCCG         | 12 |
| Akata-141690-141810 | 18502992 | CCCCGCTCCGGCGGGGGTGGCCGGCTGCAGCCGGTCCGGGGTCCGGCCCTGGAGCTCGGGGGGCGCCGGGTGCCACCAGGGTCCGCTGGTCCGCTGCCCGCTCCGGCGGGGG           | 16 |
| Akata-141720-141840 | 18674316 | GCCGGGTCCGGGGTCCGGAGCTCGGGGGGCGCCGGGTGCCACCAGGGTCCGCTGGTCCGCTGCCCGCTCCGGCGGGGGTGGCCGGCTGCAGCCGGTCCGGGGTCCG                 | 12 |
| Akata-141750-141870 | 18845640 | GGGGGGGCGGGTGGCCACCAGGGTCCGCTGGTCCGCTGCCCGCTCCGGCGGGGGTGGCCGGCTGCAGCCGGTCCGGGGTCCGGCCCTGGAGCTCGGGGGGCGCCGGGTGGC            | 16 |
| Akata-141780-141900 | 19018694 | CTGGTCCGCTGCCCGCTCCGGCGGGGGTGGCCGGCTGCAGCCGGTCCGGGGTCCGGCCCTGGAGCTCGGGGGGCGCCGGGTGCCACCAGGGTCCGCTGGTCCGCTGCCCGC            | 12 |
| Akata-141810-141930 | 19188288 | TGGCCGGTGCAGCCGGTCCGGGGTCCGGCCCTGGAGCTCGGGGGGCGCCGGGTGCCACCAGGGTCCGCTGGTCCGCTGCCCGCTCCGGCGGGGGTGGCCGGTGCAGCCGG             | 12 |
| Akata-141870-141990 | 19359612 | CCACCAGGTCCGCTGGTCCGCTGCCCGCTCCGGCGGGGGTGGCCGGCTGCAGCCGGTCCGGGGTCCGGCCCTGGAGCTCGGGGGGCGCCGGGTGCCACCAGGGTCCGCTGGT           | 12 |
| Akata-141960-142080 | 19530936 | CGCCGGTGGCCACCAGGGTCCGCTGGTCCGCTGCCCGCTCCGGCGGGGGTGGCCGGCTGCAGCCGGTCCGGGGTCCGGCCCTGGAGCTCGGGGGGCGCCGGGTGGCCACC             | 12 |
| Akata-141990-142110 | 19702260 | CCGCTGCCCGCTCCGGCGGGGGTGGCCGGCTGCAGCCGGTCCGGGGTCCGGCCCTGGAGCTCGGGGGGCGCCGGGTGCCACCAGGGTCCGCTGGTCCGCTGCCCGCTCCGGC           | 12 |
| Akata-142020-142140 | 19873584 | GCTGCAGCCGGTCCGGGGTCCGGCCCTGGAGCTCGGGGGGCGCCGGGTGCCACCAGGGTCCGCTGGTCCGCTGCCCGCTCCGGCGGGGGTGGCCGGTGCAGCCGGTCCGGG            | 12 |
| Akata-142050-142170 | 20044908 | GAGCTCGGGGGGCGCCGGTGGCCACCAGGGTCCGCTGGTCCGCTGCCCGCTCCGGCGGGGGTGGCCGGCTGCAGCCGGTCCGGGGTCCGGCCCTGGAGCTCGGGGGGCGCCG           | 12 |
| Akata-142200-142320 | 20216232 | CCCCGCTCCGGCGGGGGTGGCCGGCTGCAGCCGGTCCGGGGTCCGGCCCTGGAGCTCGGGGGGCGCCGGGTGCCACCAGGGTCCGCTGGTCCGCTGCCCGCTCCGGCGGGGG           | 16 |
| Akata-142230-142350 | 20387556 | GCCGGTCCGGGGTCCGGCCCTGGAGCTCGGGGGGCGCCGGGTGCCACCAGGGTCCGCTGGTCCGCTGCCCGCTCCGGCGGGGGTGGCCGGTGCAGCCGGTCCGGGGTCCG             | 12 |
| Akata-142290-142410 | 20558880 | CTGGTCCGCTGCCCGCTCCGGCGGGGGTGGCCGGCTGCAGCCGGTCCGGGGTCCGGCCCTGGAGCTCGGGGGGCGCCGGGTGCCACCAGGGTCCGCTGGTCCGCTGCCCGC            | 12 |
| Akata-142320-142440 | 20730204 | TGGCCGGTGCAGCCGGTCCGGGGTCCGGCCCTGGAGCTCGGGGGGCGCCGGGTGCCACCAGGGTCCGCTGGTCCGCTGCCCGCTCCGGCGGGGGTGGCCGGTGCAGCCGG             | 12 |
| Akata-142470-142590 | 20901528 | CGCCGGTGGCCACCAGGGTCCGCTGGTCCGCTGCCCGCTCCGGCGGGGGTGGCCGGCTGCAGCCGGTCCGGGGTCCGGCCCTGGAGCTCGGGGGGCGCCGGGTGGCCACC             | 12 |
| Akata-142500-142620 | 21072852 | CCGCTGCCCGCTCCGGCGGGGGTGGCCGGCTGCAGCCGGTCCGGGGTCCGGCCCTGGAGCTCGGGGGGCGCCGGGTGCCACCAGGGTCCGCTGGTCCGCTGCCCGCTCCGGC           | 12 |
| Akata-142530-142650 | 21244176 | GCTGCAGCCGGTCCGGGGTCCGGCCCTGGAGCTCGGGGGGCGCCGGGTGCCACCAGGGTCCGCTGGTCCGCTGCCCGCTCCGGCGGGGGTGGCCGGTGCAGCCGGTCCGGG            | 12 |
| Akata-142560-142680 | 21415500 | GAGCTCGGGGGGCGCCGGTGGCCACCAGGGTCCGCTGGTCCGCTGCCCGCTCCGGCGGGGGTGGCCGGCTGCAGCCGGTCCGGGGTCCGGCCCTGGAGCTCGGGGGGCGCCG           | 12 |
| Akata-142590-142710 | 21586824 | GGTCCGCTGGTCCGCTGCCCGCTCCGGCGGGGGTGGCCGGCTGCAGCCGGTCCGGGGTCCGGCCCTGGAGCTCGGGGGGCGCCGGGTGCCACCAGGGTCCGCTGGTCCGCTG           | 12 |
| Akata-142620-142740 | 21758148 | GGGGGGTGGCCGGCTGCAGCCGGTCCGGGGTCCGGCCCTGGAGCTCGGGGGGCGCCGGGTGCCACCAGGGTCCGCTGGTCCGCTGCCCGCTCCGGCGGGGGTGGCCGGTGA            | 12 |
| Akata-142680-142800 | 21929472 | GGTGGCCACCAGGGTCCGCTGGTCCGCTGCCCGCTCCGGCGGGGGTGGCCGGCTGCAGCCGGTCCGGGGTCCGGCCCTGGAGCTCGGGGGGCGCCGGGTGCCACCAGGGTCCG          | 12 |
| Akata-143370-143490 | 22100796 | TTCTACTGGGACCCCCCTACCTTAAGTGGCCACCCTTCTCTCCGTTTAAATGGTAGAATAACCTATAGGTTATTAACCTAGTGGTGAATAGGTTATGCAGTGGG                   | 4  |
| Akata-143400-143520 | 22272120 | TAAGGTGCGCCACCCTTCCCTCCGTTTAAATGGTAGAATAACCTATAGGTTATTAACCTAGTGGTGAATAGGTTATGCAGTGGGTTATAGGTTATAGAACCTAGAG                 | 4  |
| Akata-143430-143550 | 22443444 | TAATGGTAGAATAACCTATAGGTTATTAACCTAGTGGTGAATAGGTTATGCAGTGGGTTATAGGTTATAGAACCTAGAGGAAGGAAACCTATAGTGAATCCCTCCCC                | 4  |
| Akata-167310-167430 | 22614768 | CCAAAAGCAGCGTAGGAAGGTGTGATACCCGGCGCCCGTCTGTATCGAAAGCGGGCCCGGTCACCTCCTTTGTTTCAAGCTCATCCGTCAAATTTGGAGGGCCCTCATATTT           | 4  |
| Akata-167340-167460 | 22786092 | CGGCGCCCGCTGTGTATCGAAGGCGGGCCCGGTACCTCCTTTGTTTCAAGCTCATCCGTCAAATTTGGAGGGCCCTCATATTTCCAGCAGAGTCCGCTAGGGTTATGAGGCAGCG        | 4  |
| Akata-168000-168120 | 22957416 | AGACTCGTGTAAAAAAGAGTGTAGGGCTGGAAGGTGAGGGTGTGGTAATAAGTCTTAGGAAATGTTAGTACTTACCAAGTAAGCAGCCAAAGATGAACAGCACAAATCAAGGTA         | 4  |
| Akata-168300-168420 | 23128740 | GATAAAGATGATGAGAATGATAATAAAGAACATGAGAGCAAAAGGAATAGAGGACAAGGAGCGCTCCTCCAGTCCAGTTACTATAACGATATACAGCCAGAACAGTAGCCCAAGAGA      | 4  |
| Akata-168330-168450 | 23300064 | CATGAGAGCAAAAGGAATAGAGGACAAGGAGCGCTCCTCCAGTCCAGTTACTATAACGATATACAGCCAGAACAGTAGCCCAAGAGAAGGAGAAGGAGAGCAAGGCCTATGGAAGAGGA    | 4  |
| Akata-168360-168480 | 23471388 | CGCTCCTCCAGTCCAGTTACTATAACGATATACAGCCAGAACAGTAGCCCAAGAGAAGGAGAGAGCAAGGCCTATGGAAGAGGAGAGGGGGGCTCCTAGAGGGGGCGTGGCGG          | 4  |
| Akata-168390-168510 | 23642712 | ATACAGCCAGAACAGTAGCCCAAGAGAAGGAGAAGGAGAGCAAGGCCTATGGAAGAGGAGAGGGGGGCTCCTAGAGGGGGCGTGGCGGGCCCGTCCAGGTCGCGTTT                | 4  |
| Akata-168420-168540 | 23814036 | GAGAAGGAGAGCAAGGCCTATGGAAGAGGAGAGGGGGGCTCCTAGAGGGGGCGTGGCGGGCCCGTGGCCCGCTCAGGTCGCGTTCCATGGTACGGGTAGTGTGGCAGGAGCAAGG        | 8  |
| Akata-168450-168570 | 23985360 | GAGGGGGGGTCCTAGAGGGGGCGCTGGCGGGCCCGTGGCCCGCTCCTCAAGGTCCGCTCCATGGTCAAGGTTAGTGTGGCAGGACAAGGCAACTGAGGAAAGAAAGCTGACAGAGCAGTG   | 8  |
| Akata-168480-168600 | 24156684 | GCCCGTGGGCCCTCCTCAAGGTCCGCTCCATGGTCCAGGTAGTGTGGCAGGAGCAAGGCAACTGAGGAAAGAAAGCTGACAGAGCAGTGCAGAGGCTTATGTAGGCCCTACGAGAG       | 4  |
| Akata-168510-168630 | 24328008 | CATGTTACAGGTAGTGTGGCAGGAGCAAGGCAACTGAGGAAAGAAAGCTGACAGAGCAGTGCAGAGGCTTATGTAGGCCGCTACGAGAGAGTAAACGCTGTTTCTGGGGATGGAGGCC     | 4  |
| Akata-168540-168660 | 24499332 | CAACTGAGGAAAGAGCTGACAGAGCAGTGCAGAGAGGCTTATGTAGGCCGCTACGAGAGAGTAAACGCTGTTTCTGGGGATGGAGGCCCGGGGGGATTTCCGGGGTCTGCCGAGGCAG     | 4  |
| Akata-168570-168690 | 24670656 | ACAGAGGCTTATGTAGGCCGCTACGAGAGAGTAAACGCTGTTTCTGGGGATGGAGGCCCGGGGGGATTTGGGGGTTCCCGGAGGCAAGTACGGGCGCCGCTTTCCGAAAGCGGCGTA      | 4  |
| Akata-168600-168720 | 24841980 | AGTAACGCTGTTTCTGGGGATGGAGCCCGGGGGGATTTCCGGGGTCCGGGAGGCAAGTACGGGCGCCGCTTTCCGAAAGCGGCTAGTGTGTGATGTAAGCGTTAAAAGAGGA           | 4  |
| Akata-168630-168750 | 25013304 | GGGGGATTTGCGGGTCTGCCGAGGCAAGTACGGGCGCCGCTTTCCGAAAGCGGCGTATGTGTGTCATGTAAGCGTTAAAAGAGGAAAGTAAAGCGGTGTGTCTGTGTAGAAAAG         | 4  |
| Akata-168660-168780 | 25184628 | TACGGGCGCCGCTTTCCGAAAGCGGCGTAGTGTGTGTCATGTAAGCGTTAAAAGAGGAAAGTAAAGCGGTGTGTCTGTGTAGAAAAGCGAGTCCCGAGGGGCAAGCTGTGGGAATG       | 4  |
| Akata-168690-168810 | 25355952 | GTGTGTGTCATGTAAGCGTTAAAAGAGGAAAGTAAAGCGGTGTGTCTGTGTGTAAGCGTTAAAAGAGGCAAGTCCCGAGGGGCAAGCTGTGGGAATCCGCTGTAAGCGTAGCAGGAAATGGA | 4  |
| Akata-168720-168840 | 25527276 | AGTAGAAAGCGTGTGTCTGTGTTAAGAAAGCGAGTCCCGAGGGGCAAGCTGTGGGAATCCGCTGTTAAGCGTAGCAGGAAATGAAAGGCAAGTCCGGCAATCACAAGGGGGAGTGAGC     | 4  |
| Akata-168750-168870 | 25698600 | CGAGTCCCGAGGGGCAAGCTGTGGGAATCCGCTGTTAAGCGTAGCAGGAAATGAAAGGCAAGTCCGGCAATCACAAGGGGAGTGCAGAGTGTGTGGGAAGCGGCAAGTGTATCCAC       | 4  |
| Akata-168780-168900 | 25869924 | CGGTGTAAGCGTAGCAGGAAATGAAAGCGAGTCCGGCAATCACAAGGGGAGTGCAGAGTGTGTGGGAAGCGGCAAGTGTATCCACAAAGAGGCGTAGGGCGCGCAACGTTGGG          | 4  |
| Akata-168810-168930 | 26041248 | GCAGTGGCGCAATCACAAGGGGAGTGCAGAGTGTGTGGGAAGCGGAGTGTATCCACAAAGAGGCGTAGGGCGCGCAACGTTGGGAGGTCGTTGTCCGAGGGGGAGGCTGTGC           | 4  |
| Akata-168840-168960 | 26212572 | AGTGTGTGGGAAGCGCAGTGTATCCACAAAGAGGCGTAGGGCGCGCAACGTTGGGAGGTCGTTGTCCGAGGGGGAGGCTGTGCTTTAGGGGGTTCAGGTGAGGCAAGGCTGT           | 4  |



|                     |          |                                                                                                                            |    |
|---------------------|----------|----------------------------------------------------------------------------------------------------------------------------|----|
| Akata-168870-168990 | 26383896 | ACAAAGAGCGTATAGGCGCGCAACGTTGGAGGTCGTTGTCCGCGAGCGGGAGGCTGTGCTTAGGGGGTTCAGGTGAGGCAAGGCTGTGGGTAAACCTAGGGGAGCGGGTGAGCGC        | 8  |
| Akata-169110-169230 | 26555220 | GCGGAAAGTCGCTGCGGCTTGTGGCTGGGCGATGGGGGGCGATTCTGGAAAAAGTGAGGGGGCGTGCCCTGCCCGCGCCCGCCCTAGCCCCCGCACAGCGCGCGCAACG              | 8  |
| Akata-169140-169260 | 26726544 | GCCATGGGGGCGCATTCCTGAAAAAGTGAGGGGGGCTGGCTGCCCGCGCGCCCGCTAGCCCCCGCGCACAGCGCGCGCAACGCGGGCGGGCGGGGGGGTTCGGGTCGGC              | 12 |
| Akata-169170-169290 | 26897868 | GAGGGGGCTGGCTGCCCGCGCGCCCGCTAGCCCCCGCGCACAGCGCGCGCAACGCGGGCGGGCGGGGGGGTTCGGGTCGGCGGGCTCCGGGGCTCGCGGGGTCGGATGGCG            | 16 |
| Akata-169320-169440 | 27069192 | GCGCGCGCGCCCGCCAGCCATGCGTGACCGGAGGAGGGACAGGGTCCGAGGGGGCTGTCTGGTGGGGCGGGAGCGGGGGCGGGCGGGAGCCTGCACGCGCTTGAGGGGAGGA           | 12 |
| Akata-169350-169470 | 27240516 | GCGAGGAGGGACAGGTCGAGGGGGCTGTCTGGTGGGGGGAGCGGGGGCGGGAGCCTGCACGCGCTTGAGGGGAGGATGACAGGGGGCGGGGACAGAGAGCGGCTC                  | 12 |
| Akata-169380-169500 | 27411840 | GTCATTGGGGCGGGAGCGGGGGCTGCGCGGGAGCTGCCCGCGCCCTTGAGGGGAGGATGACAGGGGGCGGGGACAGAGAGCGGTCGCCCGCGCGAGCGCAAGCCCG                 | 12 |
| Akata-169440-169560 | 27583164 | TGACAGGGGGCGGGGACAGAGGGCGTCCGCCCGCGCGCGGCAAGCCCGGGGGCGGGGGCGGGCGGGGACGCGGAGCGTGACGAAGGGCCCCAGGGCTGACCCCGCAACG              | 12 |
| Akata-169830-169950 | 27754488 | GTTACAGGGAAAGCGGGGGGTCGGGGGCGCGGCCCGCCAGCCATGCGTGACCGGAGGAGGGACAGGGTCCGAGGGGGCTGTCTGGTGGGGCGGGAGCGGGGGCGCGCGGGAG           | 12 |
| Akata-169860-169980 | 27925812 | GCGCCCGCCAGCCATGCGTGACCGGAGGAGGGACAGGGTCCGAGGGGGCTGTCTGGTGGGGCGGGAGCGGGGGCGGGCGGGAGCCTGCACGCGCTTGAGGGGAGGATGACAG           | 12 |
| Akata-169890-170010 | 28097136 | AGGGGACAGGTCGAGGGGGCTGTCTGGTGGGGCGGGAGCGGGGGCGGGGCGGGAGCCTGCACGCGCTTGAGGGGAGGATGACAGGGGGCGGGGACAGAGAGCGGCTCCGCCC           | 12 |
| Akata-170220-170340 | 28268460 | GCAATTCGGAAAAAGTGAGGGGGCGCGCGCCCGCGCCCGCTGACCCCGCGCGCCCTGAGGGGGAGGATGACAGGGGGCGGGGGGGCGGGGGTCCGGGTCGGCGGCTCCGGGGC          | 12 |
| Akata-170370-170490 | 28439784 | GGAACCGGGGGTGGGGGGCGCGCCCGCCAGCCATGCGTGACCGGAGGAGGGGACAGGGTCCGAGGGGGCTGTCTGGTGGGGCGGGAGCGGGGGCGGGCGGGAGCCTGCA              | 12 |
| Akata-170400-170520 | 28611108 | GCCAGCCATGCGTGACCGGAGGAGGGGACAGGGTCCGAGGGGGCTGTCTGGTGGGGCGGGAGCGGGGGCGGGCGGGAGCCTGCACGCGCTTGAGGGGAGGATGACAGGGGGC           | 12 |
| Akata-170580-170700 | 28782432 | CGGGACGGGAGCGTGACGAAGGGCCCCAGGGCTGACCCCGCAACGTTGACCGGGGGTCCGGGGTACCCAGCAAGCGTGACCAAGGGGGCGCTGGGTGACACAGGCAACCTGACA         | 8  |
| Akata-170880-171000 | 28953756 | CGGTGGATGGCGCTGGCTTACGGGAACGGGGGGTGGGGGGCGGGCGCCCGCCAGCCATGCGTGACCGGAGGAGGGACAGGGTCCGAGGGGGCTGTCTGGTGGGGCGGGAG             | 12 |
| Akata-170910-171030 | 29125080 | GGGGGGTCGGGGCGCGCGCCCGCCAGCCATGCGTGACCGGAGGAGGGGACAGGGTCCGAGGGGGCTGTCTGGTGGGGCGGGAGCGGGGGCGGGCGGGAGCCTGCACGCGCT            | 12 |
| Akata-170940-171060 | 29296404 | CCATGCGTGACCGGAGGAGGGGACAGGGTCCGAGGGGGCTGTCTGGTGGGGCGGGAGCGGGGGCGGGCGGGAGCCTGCACGCGCTTGAGGGGAGGATGACAGGGGGCGGGGAC          | 12 |
| Akata-171203-171323 | 29467728 | GGCCGCTGGTGACACAGCAACCTTGACAAAGGCCCGCCAGAAAGACCCCGGGGGTATCGGGGGTGTGATGGGGGATGGGGGGTCGGATTTCGCCCTATTGCCCTGTTT               | 8  |
| Akata-171203-171323 | 29639052 | GGCCGCTGGTGACACAGCAACCTTGACAAAGGCCCGCCAGAAAGACCCCGGGGGTATCGGGGGTGTGATGGGGGATGGGGGGTCGGATTTCGCCCTATTGCCCTGTTT               | 8  |
| Akata-171203-171323 | 29810376 | GGCCGCTGGTGACACAGCAACCTTGACAAAGGCCCGCCAGAAAGACCCCGGGGGTATCGGGGGTGTGATGGGGGATGGGGGGTCGGATTTCGCCCTATTGCCCTGTTT               | 8  |
| Akata-171203-171323 | 29981700 | GGCCGCTGGTGACACAGCAACCTTGACAAAGGCCCGCCAGAAAGACCCCGGGGGTATCGGGGGTGTGATGGGGGATGGGGGGTCGGATTTCGCCCTATTGCCCTGTTT               | 8  |
| GD1-7980-8100       | 171658   | GACAGAGATTAGGATAGCATATGCTACCCAGATATAGATTAGGATAGCATATGCTACCCACATATTTGGGATAGTATATGCTATCCAAGGCAACATTATTCACCCTGCTCTCAGCGACT    | 4  |
| GD1-8010-8130       | 343316   | GATATAGATTAGGATAGCATATGCTACCCACATATTTGGGATAGTATATGCTATCCAAGGCAACATTATTCACCCTGCTCTCAGCGACTCGTGAATATGAGGACCACACCCTGTGCT      | 4  |
| GD1-12840-12960     | 514974   | GTTGGTCTGCCCTCTCTCTGTCTTCCAGGAAACAGGACCTCGGGCACCCAGAGCCCTCGGGCCCGCTCCAGCGCCCTCTGTCTCCGCTCCCTCTTAGCCCCGTTAAAC               | 8  |
| GD1-12870-12990     | 686632   | AGGAACAGGGGACCTCGGGCACCCAGAGCCCTCGGGCCCGCTCCAGGCCCTCTGGTCTCCGCTCCCTTAGCCCCGTTAAACCAAGAAATGTCTGAGGGGAGCCACCCTCG             | 8  |
| GD1-12900-13020     | 858290   | CCCTCGGGCCGCTCCAGGCGCCCTCTGGTCTCGCTCCCTCTTAGCCCCGTTAAACCAAGAAATGTCTGAGGGGAGCCACCCTCGGGGGCACCCAGCCAGAGTCCAGAGTCCAGG         | 8  |
| GD1-14280-14400     | 1029948  | GCCCAAGGGGGTTCCGCTTACAGGCCCTTACAGGCCCTTACGTAAGCCAGCAGAGCCAGCAACCTTGTCAAGTTCTAGGGAGGGGGACCTGCCCTGGTATAAAGTGGTCTCT           | 4  |
| GD1-15780-15900     | 1373264  | CCCAGGGTCTCCAGGAGGGTCCGGCATCTCCAGGGGAGGAGGCTCACCACCAGGCCCGCCAGACCAGGGTCTCGGGCAGCCAGCCAGCCGCCCGCGGGCGCCCTCTCGGG             | 12 |
| GD1-17610-17730     | 1544922  | TGCCCTGCCCGCGGGGCCACTTCATCACCGTCTGACTCCGCCATCCAGCCTAGGGGAGACCGAAGTGAAGTCCCTGGACCAGCCCGCGGGCGCCCGGGTATCGGGCCAGAGGT          | 8  |
| GD1-18120-18240     | 1716580  | CGTCTCCAGAGACCCGGGCTTCAGGCCCTGCCTCTCTCTTACCTTTTGAACACAGCCTGGACACATGTGCCAGACGCTGGGCCCTTAAGGCCCTCGGGTCCCGCTGGACCCCG          | 8  |
| GD1-18150-18270     | 1888238  | GCCTCTCTGTTACCTTTTGAACACAGCCTGGACACATGTGCCAGAGCCTGGGCTTAAGGCCCTCGGGTCCCGCTGGACCCCGCCCTAGCAACCTGCTGCTCCCGTCTGCTGCC          | 8  |
| GD1-18180-18300     | 2059896  | CCTGGACACATGTGCCAGAGCCTGGGCCCTAAGGCCCTCGGGTCCCGCTGGACCCCGCCCTAGCAACCTGCTGCTCCCGTCTGCCACCCAGCCCTCCCGCTCCCGTCCCGCT           | 8  |
| GD1-18210-18330     | 2231554  | CTAAGGCCCTCGGGTCCCGTGGACCCCGCCCTAGCAACCTGCTGCTCCCGTCTGCCACCCAGCCCTCCCGCTCCCGTCCCGTCCCGTCCCGTCCCGTCCCGTCCCGTCCCGTCCCGT      | 8  |
| GD1-18240-18360     | 2403212  | CCTCAGCAACCTGCTGCTCCCGTCTGCCACCCAGCCCTCCCGCTCCCGTCCCGTCCCGTCCCGTCCCGTCCCGTCCCGTCCCGTCCCGTCCCGTCCCGTCCCGTCCCGTCCCGT         | 8  |
| GD1-21540-21660     | 2574870  | AGGCCCGCGCCATTGGGCCAGATTGAGAGACAGTCCAGGGGGGAGGGTTGAGGCGAGCGGGACCCGAGGTCACAGCCCGGGTCCCTCCGGGGGACAGACAGGACAGGGGCCCGC         | 8  |
| GD1-21570-21690     | 2746528  | GACCAGTCCAGGGGCGGAGGTTGGAGCCAGCGGGCACCCAGGTCAGGAGCCCGGGTCCCTCCGGGGGAGAGACAGGAGGGGCCCGCGAGCTGGCCCGAGGAGGGCGCCCGGAG          | 12 |
| GD1-21810-21930     | 2918186  | GTCCGCTAGGCCCGGGAAAGTGAGGGGGATCGCCGGGGTCTGTGTTGCGAGAGTCCGGGGCATCTCTGAGACCCCTCGGGCCGAGCGCCCGCCCTAGGCCCGCCAGACAGCCCA         | 8  |
| GD1-23130-23250     | 3089844  | CCCCAGAAGCCCCAAAGTAGAGGCTCAGGCCATGCGCGCCCTGTACCAGGCGCTGCCAAAGAGCCAGATCTAAGGCCAGGAGGAGCCAGCCCAAGCGGGTGACAGTAAAGGTAATCT      | 4  |
| GD1-23160-23280     | 3261502  | GCCATGCGGCGCTGTACCAGGCTGCCAAAGAGCCAGATCTAAGGCCAGGAGGAGCCAGCCCAAGCGGGTGACAGTAAAGGTAATCTCTGGTAGTGATTTGGACCCGAAATCTGACA       | 4  |
| GD1-23190-23310     | 3433160  | AAGAGCCAGATCTAAGGCCAGGAGAGGCCAGCCCAAGCGGGTGACAGTAAAGGTAATCTCTGGTAGTGATTTGGACCCGAAATCTGACACTTTAGAGCTCTGGAGGACTTTAAACTCT     | 4  |
| GD1-23220-23340     | 3604818  | CCCCAAGCGGGTGACAGTAAAGGTAATCTCTGGTAGTGATTTGGACCCGAAATCTGACACTTTAGAGCTCTGGAGGACTTTAAACTCTAAAACTAAAACTAAAACTTAGAGGCGAATGGCGC | 4  |
| GD1-23250-23370     | 3776476  | CTGGTAGTGATTTGGACCCGAAATCTGACACTTTAGAGCTCTGGAGGACTTTAAACTCTAAAACTAAAACTTAGAGGCGAATGGCGGCAATTTGTCGCCACGGCGCATATGGCG         | 4  |
| GD1-23550-23670     | 3948134  | GTAAGCCAGACAGCAAGTGTGAGTTCTAGGAGGGGACCCTGCCCTGGTATAAAGTGGTCTGAGCTATTTCTGGTCCGATCAGAGCGCCAGGAGTCCACACAAATGTAAGA             | 4  |
| GD1-23790-23910     | 4119792  | CTGACTCCGCATCCAAGCCTAGGGGAGACCGAAGTGAAGTCCCTGGACCAGCCCGCCCGGGGCCCGGGTATCGGGCCAGAGGTAAGTGGACTTTAATTTTCTGCTAAGCCCAACA        | 4  |
| GD1-24510-24630     | 4291450  | CTCTGGCCACGCACCTCGGGCCAGGCCACTTAGACCCGCGCAAGCCCATCCCTGAAGACCCAGCGGCCATTTCTCTGTGTAACGAGAGAGAAAGTAGAGGCCCGCGGCATTGG          | 4  |
| GD1-25260-25380     | 4463108  | TGTCTGAGGGGAGCCACCCTCGGGGCCAGGCCAGAGTCCAGAGGTCAGGGGACCTCAGGGTGCCTCCCGGGTCCAGGCCAGCCGAGGGAGCCCGCGCCCGGGCGCCCGCAG            | 12 |
| GD1-25290-25410     | 4634766  | GCCACAGATCCAGAGGTCAGGGACCTCAGGTGCTCCCGGGTCCAGGCGCCAGCCGAGGGACCCCGGAGGCGGGGCGCCAGGCGGGGCGGGGACAGGCGGGTCTCCCGGGCT            | 12 |
| GD1-25320-25440     | 4806424  | AGGGTCTCCCGGGTCCAGGCGCCGAGGACCCCGGCGCCAGCCGAGGGCGGGCGGGCAGAGCCGTTCTCGCCCTTCCCGGGCTTCAAGAGCCAGGATGTCGCCAGAAAGGAGCC          | 12 |
| GD1-26130-26250     | 4978082  | CTTTGTCAGATGTCAGGGGTCCCGAGGGCGAGGCCAGCCCGTCCACCCCTGTCCACTGCCCGGTCCCGCCAGAACGCCCCAAAGTAGAGGCTCAGGCCATGCGCGCCCTGTC           | 8  |
| GD1-28740-28860     | 5149740  | AGTCGCTTCCCTTCCCGTGGCTTCTTCCCGCTCCACCCAGGCCCTCAGCTTCCCTCCCGGGTCCATCAGGCCGGCGGAGGGACCCGGCGGGCGGGTGTCTAGTCC                  | 8  |

|                   |          |                                                                                                                         |    |
|-------------------|----------|-------------------------------------------------------------------------------------------------------------------------|----|
| GD1-29160-29280   | 5321398  | TTGCCCCCTGGCGGCCAGCCCGACCCCGGGGCCCAAACTTTGTCCAGATGTCAGGGGTCGCCAGGGGCGAGGCCAGCCCTCCACCCCTGTCCACTGCCCGGTCCCC              | 12 |
| GD1-30120-30240   | 5493056  | TAAGAAGGCACCGTCCGCACTCTACCAGAGGGGCCAAGAACCAGACGAGTCCGTAGAAGGTCCTCGTCCAGCAAGAAGAGGAGTGGTAAGCGGTTACCTTCAGGGTAAAGTA        | 4  |
| GD1-30150-30270   | 5664714  | GAGGGGGCAAGAACCAGACGAGTCCGTAGAAGGTCCTCGTCCAGCAAGAAGAGGAGTGGTAAGCGGTTACCTTCAGGGTAAGTAACCTGACCTCTCCAGGGCTCACATAAAGG       | 4  |
| GD1-32940-33060   | 5836372  | CAGTTTCTAACTTTTCCCTTCCCTCCCTCTGCTTGGCCCTGGCCCGGGGCCACCTTATACCTCGCTGACTCCGCCATCAAAGCCTAGGGGAGACCAGAGTGAAGTCCCTGGACCA     | 4  |
| GD1-34200-34320   | 6008030  | TCAGCCCCCAGACAGACCCAGGGTCTCCAGGCAGGCTCCGGCATCTCCAGGGGACAGGCTACCACCACAGGCCCCAGACCCGGGTCTCGGCCAGCCGACGCGCCCGCC            | 8  |
| GD1-34230-34350   | 6179688  | AGGCAGGTCGGCATCTCCAGGGCAGCAGGCTACCACCACAGCCCCAGACCCGGGTCTCGGCCAGCGAGCCAGCCGCCCGCGCCGCCCTCTCCGGCCAGCCGCGCG               | 12 |
| GD1-34260-34380   | 6351346  | GGCTACCACCACAGGCCCCAGACCCGGTCTCGGCCAGCCGAGCCGGCCAGCCGCCGCGCTCGGTCGGGCGAGCCGCCGGGTTGGTTCTGCCCTCTCTCTGCTCA                | 12 |
| GD1-34290-34410   | 6523004  | GTCTCGCCAGCCAGCCGACCCGGCCCGCCGCGCCGCGCCCTCTCGGGGCCAGCCCGGGGTTGGTTCTGCCCTCTCTCTGTCTTCAGAGGAACCAGGGACCTCGGGACCCAGAG       | 8  |
| GD1-37200-37320   | 6694662  | GGGGCAGGGGAGGGGACAGGGCAAGTCCAGGGACAAAGCAAGCAAGCCGGTGGACCATTGGAGACCAGGCCAAACACCTCCAGTCTAGCATGCCTGAAGTCCAGTCCCGGTC        | 4  |
| GD1-38340-38460   | 6866320  | TGCGCCCGCCAGGTCTCGGGCAGCCGGCTTCTGGGCGCTCCGGGGCAGCCGGCGCGGCTGGGTCGCTGGGCCGTGCCCCGCTCCGGGTGGGGGTGGCCCGCTGGGC              | 12 |
| GD1-38370-38490   | 7037978  | CGTTCTGGCCTCCGGGGCAGCCGGCGCCCGCTGGTCCGCTGGCCGCTGCCCGCTCCGGGTGGGGGTGGCCCGCTGGGACCCGCTCGCCGCCAGGTCTGGGGCA                 | 12 |
| GD1-38460-38580   | 7209636  | ACCGCTGCGCCCGCCAGGTCTGGGGCAGCCGGGTTCTGGCCGCTCCGGGGCAGCCGGCCCGGCTGGGTCGCTGGCCGCTCGGGTGGGGGTGGCCCGCT                      | 12 |
| GD1-38490-38610   | 7381294  | GCCGGGTTCTGGCCTCGGGGGCAGCAGGGCGCCGCGCTGGGTCGCTGGGCCGTGCCCGCTCCGGGTGGGGGTGGCCCGCTGGGCACCCGCTCGCCGCCAGGTCTG               | 12 |
| GD1-38760-38880   | 7552952  | GGGGGACAGGGGCGCCGGTGGTCCGCTGGCCGCTGCCCGCTCCGGTGGGGGTGGCCCGCTGGGCACCCGCTCGCCGCCAGGTCTGGGGCAGCGGGTCTCTGGC                 | 12 |
| GD1-38790-38910   | 7724610  | GCTGGCCCGTCCCGCTCCGGGTGGGGGTGGCCCGCTGGGCACCCGCTGCCCGCCCGCCAGTCTGGGGCAGCCGGGTTCTGGCCTCGGGGGCAGCAGGGCGGCCCGGTG            | 12 |
| GD1-38820-38940   | 7896268  | GTGGCCCGCTGGGACCCGCTCGCCGCCCGCAGTCTGGGGCAGCCGGGTTCTGGCCTCGGGGGCAGCAGGGCGCCCGCGGTGGTCCGCTGGGCCGTGCCCGCTCCGGT             | 12 |
| GD1-39000-39120   | 8067926  | CTGGCGCTCCGGGGCAGCAGGGCGCCCGTGGTCCGCTGGCCGCTGCCCGCTCCGGGTGGGGGTGGCCCGCTGGGACCCGCTCGCCGCCAGGTCTGGGGCAGCCGG               | 12 |
| GD1-39600-39720   | 8239584  | CCAGTCTCGGGCAGCCGGGTTCTGGCCTCGGGGGCAGCAGGCCGGCCCGGTTGGTCCGACAGACCGATGACCCGCTCCGGGTGGGGGTGGCCCGCTGGGCACCCGCTGCGC         | 12 |
| GD1-39630-39750   | 8411242  | GCTCCGGGGCAGCAGGCCGGCCCGGTTGGTCCGACAGACCGATGACCCGCTCCGGGTGGGGGTGGCCCGCTGGGCACCCGCTCGCCGCCAGGTCTGGGGCAGCCGGGTT           | 12 |
| GD1-40800-40920   | 8582900  | ATACCAGGTGGGTGAGTAGTAGTATGAGTATGAGTCTACTGGGTACCCCGCTACCCTACTTAAGGTGGCCACCCCTCCTCTTCCGTTTAAATGTAGAATAACCTATAGGT          | 4  |
| GD1-40830-40950   | 8754558  | AGTAGGTTCTACTGGGGTACCCCGCTACCCTACCTAAGGTGCGCACCCCTCCTCTCCGTTTAAATGGTAGAATAACCTATAGGTTAATACCTAGTGGTGAATAGGGTATTGC        | 4  |
| GD1-40860-40980   | 8926216  | CCTAGCTAAGGTGCGCCACCTCCTCCTTCCGTTTAAATGGTAGAATAACCTATAGGTTAATACCTAGGTTGGTGAATAGGGTATATACCTATAGGTAATAGCA                 | 4  |
| GD1-40890-41010   | 9097874  | TCCGTTTTAAGTGTAGAATAACCTATAGTTAATACCTAGTGGTGAATAGGGTATTGACAGTGGGTATATACCTATAGGTTAATAGAACCTAGAGGAAGGAAACCCCTATAGTGAATC   | 4  |
| GD1-40920-41040   | 9269532  | TATTAACCTAGTGGTGAATAGGGTATTGACAGTGGGTATATACCTATAGGTTATAGAACCTAGAGGAAGGAAACCCCTATAGTGAATCCCTCCCGCCCTACCCCGCTCCCTTACG     | 4  |
| GD1-40950-41070   | 9441190  | AGCTGGGTATATACCTATAGGTATATAGAACCTAGAGGAAGGAAACCCCTATAGTGAATCCCTCCCGCCCTACCAGCCGTTGCCTAGAGCCATCCCGCCAGCCAGAC             | 4  |
| GD1-40980-41100   | 9612848  | CCTAGAGGAAGGAAACCTATAGTGAATCCCTCCCGCCCTACCAGCCCTCCTTACGGTTGCTGAGCCCATCCCGCCAGCACCAGCCGGGTTGACGTGGCACCAGCCGCTGCT         | 8  |
| GD1-57540-57660   | 9784506  | GGCTGCTGAGTGGAGGAGGAGGAGCCGGGGCGGCTGATTGACGGGCTGCTGCTGAGTGGAGGAGGAGAAAGAGTCTGGCCGTGGGGCTGCTGTCAGTCCGGGAAGGG             | 8  |
| GD1-57570-57690   | 9956164  | GCCGGGGCGGCTGATTGCAGGGCTGCTGCTGAGTTGGAGAGGAGGAGGAGTCCGCGGTGGGGCTGCTGCTGCAAGTCCGGGAAGGGGATGGGGTGTGCAGAGGATTTCTGGGTT      | 8  |
| GD1-58110-58230   | 10127822 | GAGTCCGAGCCGAGAGCCGGAGCCGAGAGCCGAGGCCAGAGCCGGTGCACAGAGCCGAGTGCAGAGCCGGAGCCGACAGAGCCGGAGCCGAGAGCCGGAGCCGAGAGCCG          | 12 |
| GD1-58140-58260   | 10299480 | GAGGCCGAGCCACAGAGCCGGTGCACAGAGCCGAGTGCAGAGCCGGAGCCGACAGAGCCGGAGCCGACAGAGCCGGAGCCGACAGAGCCGGAGCCGAGAGCCGGAGACGGC         | 12 |
| GD1-58170-58290   | 10471138 | GAGGCTGAGTGCAGAGCCGGAGCCGACAGAGCCGGAGCCGAGAGCCGGAGCCGACAGAGCCGGAGCCGACAGAGCCGGAGCCGAGAGCCGGAGCCGGAGGTTGGTCTTTGAGGACTATA | 8  |
| GD1-58200-58320   | 10642796 | GAGCCGGAGCCGAGAGCCGGAGCCGACAGAGCCGGAGCCGAGAGCCGGAGCCGAGAGCCGGAGCCGAGAGCCGGAGCCGAGAGCCGGAGCCGGAGCCGGAGCCGGAGCCGGAG       | 8  |
| GD1-61500-61620   | 10814454 | CGCCACCCCGCCACACCCACAGCCCTCGCGGGGGCGTAGAGGGCCCGTGGTGCGCCGGGCTGCTGCTGCTGGCCCTCGCCCGCAGGTAGCCCGCCGGCCACAGGGC              | 12 |
| GD1-61530-61650   | 10986112 | GGCGGGCTAGAGGGGCCGCTGGTGGCCGGGCTGCTGCTCTGGCTCGGCCCTCCCGCCGAGGTAGGCGCCCGGGCCACAGGGGGAAGCGGCTCGTGGGGCTCGCGGTGGGCAG        | 12 |
| GD1-61560-61680   | 11157770 | GGCTGCTGCTGCTGGCTCGCCCTCCCGCCGACAGTGGCCGCGCCGGCCACAGGGCAGAGCGGCTCGTGGGGTCCGGGTGGGCAGAGTGGGAAAGTGCAGGGCAAGGCCGA          | 8  |
| GD1-77820-77940   | 11329428 | ATATGTGACGTTGCTCTGAGATTGAACCTGGGTTCTGACAGTGCAGTGAAGAGGTTGAACCTGAAGTATGTTATGTTGGCTGTGGTAACAGCACTGTTGCATTTTTGGTTGGTGGTA   | 4  |
| GD1-81780-81900   | 11501086 | TATCCCTCAGCAACCAATGGAGGGGCTGGTCCCGCTTTAGCCAGGTTGCTGATGGTCCACACACCTGGGGTACCAGCGATGCAGCCACAGTCTTACCTCCCTTAAATCAAC         | 4  |
| GD1-81810-81930   | 11672744 | GTGCCCCCTTAGCCAGGTTGCTGATGGTCCACACACCTGGGGTACCAGCGATGCAGCCACAGTCTTGAACCTCCCTTAAATCAACCCATTAGCCAGGGGCAACCCGTGCCCGCT      | 4  |
| GD1-81840-81960   | 11844402 | TCCACACACCTGGGGTACCGGCATGCAGCCACAGTACTTGGACCTCCCTTAATTCAACCCATTAGCCAGGGGCAACCCGTGGCCCGTGGAGGCTAGTATGGCCCGGTACCTCCGG     | 4  |
| GD1-87690-87810   | 12016060 | CTCCTGCCCGGGGCTCTGCGCGGGGCTCACATACTGACGCCTCCTTCCGCGGGCTCGTATAATGGCCTCCGCTGTCAGTATGTTATGAGGGAGCCAGAGCTCCCGCAGT           | 8  |
| GD1-87720-87840   | 12187718 | CTCACATACTGACGCCTCCTTCCCGCCGGCCTGTATAATGGCGCCTCCCGTCTGACGATGTTTATGAGGGAGCCAGAGTCCCGCAGTCCACCGGCCGTAACCTCAGTGTCTTGGG     | 4  |
| GD1-96360-96480   | 12359376 | CAGGAGCAGGAGGGCAGGAGGGCAGGAGCAGGAGGAGGAGCAGGAGGGCAGGAGCAGGAGGAGGGCAGGAGGAGGGCAGGAGCAGGAGGGGAGGAGGAGGAGGAGGAGGAGG        | 8  |
| GD1-96390-96510   | 12531034 | CAGGGAGGAGGAGGAGGAGGGCAGGAGGAGGAGGGCAGGAGGGCAGGAGGAGGAGGAGGAGGAGGAGGAGGAGGAGGAGGAGGAGGAGGAGGAGGAGGAGGAGGAGGAGGAGG       | 8  |
| GD1-140790-140910 | 12702692 | CTCGGGGGCGGGTGGCCACCGGGTCCGCTGGTCCGCTGCCCGCTCCGGCGGGGGTGGCCGCTGCAGCCGGTCCGGGTTCCGGCCCTGGAGCTCGGGGGCGCCGGT               | 12 |
| GD1-140850-140970 | 12874350 | GGGTGGCCGCTCAGCCGGTCCGGGTTCCGGCCTGGAGCTCGGGGGCGCCGGTGGCCACCGGTCGCTGGTCCGCTGCCCGCTCCGGCGGGGGTGGCCGCTGCAGCC               | 12 |
| GD1-140880-141000 | 13046008 | CCGGCCCTGGAGCTCGGGGGCGCCGGTGGCCACCGGGTCCGCTGGTCCGCTGCCCGCTCCGGCGGGGGTGGCCGGTGCAGCCGGTCCGGGTTCCGGCCCTGGAGCTCGGG          | 12 |
| GD1-140910-141030 | 13217666 | GGCCACCCGGTCCGCTGGTCCGCTGCCCGCTCCGGCGGGGGTGGCCGCTGCAGCCGGTCCGGGTTCCGGCCCTGGAGCTCGGGGGCGCCGGTGGCCACCCGGTCCGCTG           | 12 |
| GD1-140940-141060 | 13389324 | CGTCCGGCGGGGTGGCCGCTGCAGCCGGTCCGGGTTCCGGCCTGGAGCTCGGGGGCGCCGGTCCGGGTCAGGCGGGCCAGCCGGTCCGCTGGTCCGCTCCCGCTCCGGCGGGGGTGG   | 12 |
| GD1-140970-141090 | 13560982 | GGGTCCGGGTTCCGGCCCTGGAGCTCGGGGGCGCCGGTGGCCACCGGTTCCGCTGGTCCGCTGCCCGCTCCGGCGGGGGTGGCCGCTGCAGCCGGTCCGGGTTCCGGCC           | 12 |
| GD1-141000-141120 | 13732640 | GGGGCGGGTGGCCACCGGGTCCGCTGGTCCGCTGCCCGCTCCGGCGGGGGTGGCCGGTGCAGCCGGTCCGGGTTCCGGCCCTGGAGCTCGGGGGCGCCGGTGGCCCA             | 12 |
| GD1-141030-141150 | 13904298 | GGTCCGCTGCCCGCTCCGGCGGGGGTGGCCGGTGCAGCCGGTCCGGGTTCCGGCCCTGGAGCTCGGGGGCGCCGGTGGCCACCGGGTCCGCTGGTCCGCTGCCCGCTCC           | 12 |

|                   |          |                                                                                                                |    |
|-------------------|----------|----------------------------------------------------------------------------------------------------------------|----|
| GD1-141060-141180 | 14075956 | CCGGTGCAGCCGGTCCGGGTTCCGGCCCTGGAGCTCGGGGGGCGCCGGTGGCCACCGGGTCCGCTGGTCCGCTGCCCGCTCCGGCGGGGGTGGCCGGTGCAGCCGGTCC  | 12 |
| GD1-141090-141210 | 14247614 | CTGGAGCTCGGGGGCGCCGGTGGCCACCGGGTCCGCTGGTCCGCTGCCCGCTCCGGCGGGGGTGGCCGGTGCAGCCGGTCCGGGTTCCGGCCCTGGAGCTCGGGGGCGG  | 12 |
| GD1-141120-141240 | 14419272 | CCGGTCCGCTGGTCCGCTGCCCGCTCCGGCGGGGGTGGCCGGTGCAGCCGGTCCGGGTTCCGGCCCTGGAGCTCGGGGGCGCCGGTGGCCACCGGGTCCGCTGGTCCG   | 12 |
| GD1-141150-141270 | 14590930 | GGCGGGGGTGGCCGGTGCAGCCGGTCCGGGTTCCGGCCCTGGAGCTCGGGGGCGCCGGTGGCCACCGGGTCCGCTGGTCCGCTGCCCGCTCCGGCGGGGGTGGCCGGCT  | 12 |
| GD1-141180-141300 | 14762588 | GGGTTCCGGCCCTGGAGCTCGGGGGCGCCGGTGGCCACCGGGTCCGCTGGTCCGCTGCCCGCTCCGGCGGGGGTGGCCGGTGCAGCCGGTCCGGGTTCCGGCCCTGGAG  | 12 |
| GD1-141210-141330 | 14934246 | CCGGTGGCCACCGGGTCCGCTGGTCCGCTGCCCGCTCCGGCGGGGGTGGCCGGTGCAGCCGGTCCGGGTTCCGGCCCTGGAGCTCGGGGGCGCCGGTGGCCACCGGGT   | 12 |
| GD1-141300-141420 | 15105904 | CTCGGGGGCGCCGGTGGCCACCGGGTCCGCTGGTCCGCTGCCCGCTCCGGCGGGGGTGGCCGGTGCAGCCGGTCCGGGTTCCGGCCCTGGAGCTCGGGGGCGCCGGT    | 12 |
| GD1-141330-141450 | 15277562 | CCGCTGGTCCGCTGCCCGCTCCGGCGGGGGTGGCCGGTGCAGCCGGTCCGGGTTCCGGCCCTGGAGCTCGGGGGCGCCGGTGGCCACCGGGTCCGCTGGTCCGCTGCC   | 12 |
| GD1-141420-141540 | 15449220 | GGCCACCGGGTCCGCTGGTCCGCTGCCCGCTCCGGCGGGGGTGGCCGGTGCAGCCGGTCCGGGTTCCGGCCCTGGAGCTCGGGGGCGCCGGTGGCCACCGGGTCCGCTG  | 12 |
| GD1-141450-141570 | 15620878 | CGCTCCGGCGGGGGTGGCCGGTGCAGCCGGTCCGGGTTCCGGCCCTGGAGCTCGGGGGCGCCGGTGGCCACCGGGTCCGCTGGTCCGCTGCCCGCTCCGGCGGGGGTGG  | 12 |
| GD1-141480-141600 | 15792536 | GGTCCGGGTTCCGGCCCTGGAGCTCGGGGGCGCCGGTGGCCACCGGGTCCGCTGGTCCGCTGCCCGCTCCGGCGGGGGTGGCCGGTGCAGCCGGTCCGGGTTCCGGCC   | 12 |
| GD1-141510-141630 | 15964194 | GGGGCGGGGGTGGCCACCGGGTCCGCTGGTCCGCTGCCCGCTCCGGCGGGGGTGGCCGGTGCAGCCGGTCCGGGTTCCGGCCCTGGAGCTCGGGGGCGCCGGTGGCCCA  | 12 |
| GD1-141540-141660 | 16135852 | GGTCCGCTGCCCGCTCCGGCGGGGGTGGCCGGTGCAGCCGGTCCGGGTTCCGGCCCTGGAGCTCGGGGGCGCCGGTGGCCACCGGGTCCGCTGGTCCGCTGCCCGCTCC  | 12 |
| GD1-141600-141720 | 16307510 | CTGGAGCTCGGGGGCGCCGGTGGCCACCGGGTCCGCTGGTCCGCTGCCCGCTCCGGCGGGGGTGGCCGGTGCAGCCGGTCCGGGTTCCGGCCCTGGAGCTCGGGGGCGG  | 12 |
| GD1-141630-141750 | 16479168 | CCGGTCCGCTGGTCCGCTGCCCGCTCCGGCGGGGGTGGCCGGTGCAGCCGGTCCGGGTTCCGGCCCTGGAGCTCGGGGGCGCCGGTGGCCACCGGGTCCGCTGGTCCG   | 12 |
| GD1-141660-141780 | 16650826 | GGCGGGGGTGGCCGGTGCAGCCGGTCCGGGTTCCGGCCCTGGAGCTCGGGGGCGCCGGTGGCCACCGGGTCCGCTGGTCCGCTGCCCGCTCCGGCGGGGGTGGCCGGCT  | 12 |
| GD1-141690-141810 | 16822484 | GGGGTCCGGCCCTGGAGCTCGGGGGCGCCGGTGGCCACCGGGTCCGCTGGTCCGCTGCCCGCTCCGGCGGGGGTGGCCGGTGCAGCCGGTCCGGGTTCCGGCCCTGGAG  | 12 |
| GD1-141720-141840 | 16994142 | CCGGTGGCCACCGGGTCCGCTGGTCCGCTGCCCGCTCCGGCGGGGGTGGCCGGTGCAGCCGGTCCGGGTTCCGGCCCTGGAGCTCGGGGGCGCCGGTGGCCACCGGGT   | 12 |
| GD1-141750-141870 | 17165800 | CTGCCCGCTCCGGCGGGGGTGGCCGGTGCAGCCGGTCCGGGTTCCGGCCCTGGAGCTCGGGGGCGCCGGTGGCCACCGGGTCCGCTGGTCCGCTGCCCGCTCCGGCGGG  | 12 |
| GD1-141840-141960 | 17337458 | CCGCTGGTCCGCTGCCCGCTCCGGCGGGGGTGGCCGGTGCAGCCGGTCCGGGTTCCGGCCCTGGAGCTCGGGGGCGCCGGTGGCCACCGGGTCCGCTGGTCCGCTGCC   | 12 |
| GD1-141870-141990 | 17509116 | GGGTGGCCGGTGCAGCCGGTCCGGGTTCCGGCCCTGGAGCTCGGGGGCGCCGGTGGCCACCGGGTCCGCTGGTCCGCTGCCCGCTCCGGCGGGGGTGGCCGGTGCAGCC  | 12 |
| GD1-141900-142020 | 17680774 | CCGGCCCTGGAGCTCGGGGGCGCCGGTGGCCACCGGGTCCGCTGGTCCGCTGCCCGCTCCGGCGGGGGTGGCCGGTGCAGCCGGTCCGGGTTCCGGCCCTGGAGCTCGGG | 12 |
| GD1-141930-142050 | 17852432 | GGCCACCGGGTCCGCTGGTCCGCTGCCCGCTCCGGCGGGGGTGGCCGGTGCAGCCGGTCCGGGTTCCGGCCCTGGAGCTCGGGGGCGCCGGTGGCCACCGGGTCCGCTG  | 12 |
| GD1-141960-142080 | 18024090 | CGCTCCGGCGGGGGTGGCCGGTGCAGCCGGTCCGGGTTCCGGCCCTGGAGCTCGGGGGCGCCGGTGGCCACCGGGTCCGCTGGTCCGCTGCCCGCTCCGGCGGGGGTGG  | 12 |
| GD1-142110-142230 | 18195748 | CTGGAGCTCGGGGGCGCCGGTGGCCACCGGGTCCGCTGGTCCGCTGCCCGCTCCGGCGGGGGTGGCCGGTGCAGCCGGTCCGGGTTCCGGCCCTGGAGCTCGGGGGCGG  | 12 |
| GD1-142140-142260 | 18367406 | CCGGTCCGCTGGTCCGCTGCCCGCTCCGGCGGGGGTGGCCGGTGCAGCCGGTCCGGGTTCCGGCCCTGGAGCTCGGGGGCGCCGGTGGCCACCGGGTCCGCTGGTCCG   | 12 |
| GD1-142170-142290 | 18539064 | GGCGGGGGTGGCCGGTGCAGCCGGTCCGGGTTCCGGCCCTGGAGCTCGGGGGCGCCGGTGGCCACCGGGTCCGCTGGTCCGCTGCCCGCTCCGGCGGGGGTGGCCGGCT  | 12 |
| GD1-142200-142320 | 18710722 | GGGGTCCGGCCCTGGAGCTCGGGGGCGCCGGTGGCCACCGGGTCCGCTGGTCCGCTGCCCGCTCCGGCGGGGGTGGCCGGTGCAGCCGGTCCGGGTTCCGGCCCTGGAG  | 12 |
| GD1-142230-142350 | 18882380 | CCGGTGGCCACCGGGTCCGCTGGTCCGCTGCCCGCTCCGGCGGGGGTGGCCGGTGCAGCCGGTCCGGGTTCCGGCCCTGGAGCTCGGGGGCGCCGGTGGCCACCGGGT   | 12 |
| GD1-142260-142380 | 19054038 | CTGCCCGCTCCGGCGGGGGTGGCCGGTGCAGCCGGTCCGGGTTCCGGCCCTGGAGCTCGGGGGCGCCGGTGGCCACCGGGTCCGCTGGTCCGCTGCCCGCTCCGGCGGG  | 12 |
| GD1-142290-142410 | 19225696 | GCAGCCGGTCCGGGTTCCGGCCCTGGAGCTCGGGGGCGCCGGTGGCCACCGGGTCCGCTGGTCCGCTGCCCGCTCCGGCGGGGGTGGCCGGTGCAGCCGGTCCGGGTT   | 12 |
| GD1-142320-142440 | 19397354 | CTGGGGGGCGCCGGTGGCCACCGGGTCCGCTGGTCCGCTGCCCGCTCCGGCGGGGGTGGCCGGTGCAGCCGGTCCGGGTTCCGGCCCTGGAGCTCGGGGGCGCCGGT    | 12 |
| GD1-142350-142470 | 19569012 | CCGCTGGTCCGCTGCCCGCTCCGGCGGGGGTGGCCGGTGCAGCCGGTCCGGGTTCCGGCCCTGGAGCTCGGGGGCGCCGGTGGCCACCGGGTCCGCTGGTCCGCTGCC   | 12 |
| GD1-142380-142500 | 19740670 | GGGTGGCCGGTGCAGCCGGTCCGGGTTCCGGCCCTGGAGCTCGGGGGCGCCGGTGGCCACCGGGTCCGCTGGTCCGCTGCCCGCTCCGGCGGGGGTGGCCGGTGCAGCC  | 12 |
| GD1-142410-142530 | 19912328 | CCGGCCCTGGAGCTCGGGGGCGCCGGTGGCCACCGGGTCCGCTGGTCCGCTGCCCGCTCCGGCGGGGGTGGCCGGTGCAGCCGGTCCGGGTTCCGGCCCTGGAGCTCGGG | 12 |
| GD1-142440-142560 | 20083986 | GGCCACCGGGTCCGCTGGTCCGCTGCCCGCTCCGGCGGGGGTGGCCGGTGCAGCCGGTCCGGGTTCCGGCCCTGGAGCTCGGGGGCGCCGGTGGCCACCGGGTCCGCTG  | 12 |
| GD1-142470-142590 | 20255644 | CGTCCGGCGGGGGTGGCCGGTGCAGCCGGTCCGGGTTCCGGCCCTGGAGCTCGGGGGCGCCGGTGGCCACCGGGTCCGCTGGTCCGCTGCCCGCTCCGGCGGGGGTGG   | 12 |
| GD1-142500-142620 | 20427302 | GGTCCGGGTTCCGGCCCTGGAGCTCGGGGGCGCCGGTGGCCACCGGGTCCGCTGGTCCGCTGCCCGCTCCGGCGGGGGTGGCCGGTGCAGCCGGTCCGGGTTCCGGCC   | 12 |
| GD1-142530-142650 | 20598960 | GGCGCCGGTGGCCACCGGGTCCGCTGGTCCGCTGCCCGCTCCGGCGGGGGTGGCCGGTGCAGCCGGTCCGGGTTCCGGCCCTGGAGCTCGGGGGCGCCGGTGGCCCA    | 12 |
| GD1-142560-142680 | 20770618 | GGTCCGCTGCCCGCTCCGGCGGGGGTGGCCGGTGCAGCCGGTCCGGGTTCCGGCCCTGGAGCTCGGGGGCGCCGGTGGCCACCGGGTCCGCTGGTCCGCTGCCCGCTCC  | 12 |
| GD1-142740-142860 | 20942276 | CCGGTGGCCACCGGGTCCGCTGGTCCGCTGCCCGCTCCGGCGGGGGTGGCCGGTGCAGCCGGTCCGGGTTCCGGCCCTGGAGCTCGGGGGCGCCGGTGGCCACCGGGT   | 12 |
| GD1-142770-142890 | 21113934 | CTGCCCGCTCCGGCGGGGGTGGCCGGTGCAGCCGGTCCGGGTTCCGGCCCTGGAGCTCGGGGGCGCCGGTGGCCACCGGGTCCGCTGGTCCGCTGCCCGCTCCGGCGGG  | 12 |
| GD1-142800-142920 | 21285592 | GCAGCCGGTCCGGGTTCCGGCCCTGGAGCTCGGGGGCGCCGGTGGCCACCGGGTCCGCTGGTCCGCTGCCCGCTCCGGCGGGGGTGGCCGGTGCAGCCGGTCCGGGTT   | 12 |
| GD1-142830-142950 | 21457250 | CTCGGGGGCGCCGGTGGCCACCGGGTCCGCTGGTCCGCTGCCCGCTCCGGCGGGGGTGGCCGGTGCAGCCGGTCCGGGTTCCGGCCCTGGAGCTCGGGGGCGCCGGT    | 12 |
| GD1-142860-142980 | 21628908 | CCGCTGGTCCGCTGCCCGCTCCGGCGGGGGTGGCCGGTGCAGCCGGTCCGGGTTCCGGCCCTGGAGCTCGGGGGCGCCGGTGGCCACCGGGTCCGCTGGTCCGCTGCC   | 12 |
| GD1-142890-143010 | 21800566 | GGGTGGCCGGTGCAGCCGGTCCGGGTTCCGGCCCTGGAGCTCGGGGGCGCCGGTGGCCACCGGGTCCGCTGGTCCGCTGCCCGCTCCGGCGGGGGTGGCCGGTGCAGCC  | 12 |
| GD1-142920-143040 | 21972224 | CCGGCCCTGGAGCTCGGGGGCGCCGGTGGCCACCGGGTCCGCTGGTCCGCTGCCCGCTCCGGCGGGGGTGGCCGGTGCAGCCGGTCCGGGTTCCGGCCCTGGAGCTCGGG | 12 |
| GD1-142950-143070 | 22143882 | GGCCACCGGGTCCGCTGGTCCGCTGCCCGCTCCGGCGGGGGTGGCCGGTGCAGCCGGTCCGGGTTCCGGCCCTGGAGCTCGGGGGCGCCGGTGGCCACCGGGTCCGCTG  | 12 |
| GD1-142980-143100 | 22315540 | CGCTCCGGCGGGGGTGGCCGGTGCAGCCGGTCCGGGTTCCGGCCCTGGAGCTCGGGGGCGCCGGTGGCCACCGGGTCCGCTGGTCCGCTGCCCGCTCCGGCGGGGGTGG  | 12 |
| GD1-143010-143130 | 22487198 | GGTCCGGGTTCCGGCCCTGGAGCTCGGGGGCGCCGGTGGCCACCGGGTCCGCTGGTCCGCTGCCCGCTCCGGCGGGGGTGGCCGGTGCAGCCGGTCCGGGTTCCGGCC   | 12 |
| GD1-143040-143160 | 22658856 | GGGGCGGGTGGCCACCGGGTCCGCTGGTCCGCTGCCCGCTCCGGCGGGGGTGGCCGGTGCAGCCGGTCCGGGTTCCGGCCCTGGAGCTCGGGGGCGCCGGTGGCCCA    | 12 |

|                   |          |                                                                                                                         |    |
|-------------------|----------|-------------------------------------------------------------------------------------------------------------------------|----|
| GD1-143070-143190 | 22830514 | GGTCCGCTGCCCGCTCCGGCGGGGGTGGCCGGCTGCAGCCGGTCCGGGTTCCGGCCCTGGAGCTCGGGGGCGGCCGGTGGCCACCGGGTCCGCTGGTCCGCTGCCCGCTCC         | 12 |
| GD1-143100-143220 | 23002172 | CCGGCTGCAGCCGGTCCGGGTTCCGGCCCTGGAGCTCGGGGGCGGCCGGTGGCCACCGGGTCCGCTGGGTCGCTGCCCGCTCCGGCGGGATGGGGTGCCTCCAGGCCGG           | 12 |
| GD1-143760-143880 | 23173830 | ACCCTACCTTAAGGTGCGCACCCCTTCTCTTCCGTTTAAATGAAAGAATAACCTATAGTTTATTAACCTAGTGGTGAATAGGGTATTGCAGCTGGGTATACCTATAGGTATATAGA    | 4  |
| GD1-143790-143910 | 23345488 | TTCCGTTTTAATGAAAGAATAACCTATAGTTTATTAACCTAGTGGTGAATAGGGTATTGCAGCTGGGTATATACCTATAGGTATATAGAACCTAGAGGAAGGGAACCCATATAGTGAAT | 4  |
| GD1-143820-143940 | 23517146 | TTATTAACCTAGTGGTGAATAGGGTATTGCAGCTGGGTATATACCTATAGGTATATAGAACCTAGAGGAAGGGAACCCATAGTGTAACTCCCTCCCCCCTACCCCCCTCCCTTAC     | 4  |
| GD1-143850-143970 | 23688804 | CAGCTGGGTATATACCTATAGGTATATAGAACCTAGAGGAAGGGAACCCATAGTGTAACTCCCTCCCCCTACCCCCCTCCCTTACGGTGTCTTGGAGCCATCCCCACCCAGCA       | 4  |
| GD1-143880-144000 | 23860462 | ACCTAGAGGAAGGGAACCCATAGTGTAACTCCCTCCCCCTACCCCCCTCCCTTACGGTGTCTTGGAGCCATCCCCACCCAGCAACCCCGGGTACGTGGCACCCCGCGTGCCT        | 8  |
| GD1-143910-144030 | 24032120 | CCCTCCCCCCTACCCCCCTCCCTTACGGTGTCTTGGAGCCATCCCCACCCAGCAACCCCGGGTACGTGGCACCCCGCGTGCCTTACTGACTTGTACACCTTGTGCACATTTGGTC     | 8  |
| GD1-143940-144060 | 24203778 | GGTGTCTTGGAGCCATCCCCACCCAGCACCCCGGGTACGTGGCACCCCGCGTGCCTTACTGACTTGTACACCTTGTGCACATTTGGTACGTGACCGATGCTGCCACTTCCCTGGGTC   | 4  |
| GD1-143970-144090 | 24375436 | CCCCGGGGTACGTGGCACCCCGCGTGCCTTACTGACTTGTGCACATTTGGTACGTGACCGATGCTGCCACTTCCCTGGGTATGACCTGGCCTGTGCCTTGTCCCGTGGAC          | 4  |
| GD1-144000-144120 | 24547094 | TACTGACTTGTACACCTTGTGCACATTTGGTACGTGACCGATGCTGCCACTTCCCTGGGTATGACCTGGCCTGTGCCTTGTCCCGTGGACAATGTCCCTCAGCGTGGTGGCTGCCTTTG | 4  |
| GD1-144030-144150 | 24718752 | AGCTGACCGATGCTGCCACTTCCCTGGGTATGACCTGGCCTGTGCCTTGTCCCGTGGACAATGTCCCTCAGCGTGGTGGCTGCCTTTGGGATGCATCACTTTAGCCACTAAGCCCC    | 4  |
| GD1-167910-168030 | 24890410 | TCAGGGTCTGTGGCCATTGTATCAGTGTGTGAGGGTCTGTGGGCCATTGTGAGGACCACTCCAGGTGCGCCTAGGTTTGGAGGACAGAGTGGGGTCCGTGCCGGCCCCACTC        | 4  |
| GD1-169500-169620 | 25062068 | GGGGGGCGCATTCTGGAAAAAGTGGAGGGGGCGTGGCCTGCCCGCGGGCCCCCTAGCCCCCGCACAGCGCGCGCAACGGCGGGCGGGCGGGGGGGTCCGGGTCGGCGGGCTC        | 12 |
| GD1-169710-169830 | 25233726 | GAGGGGACAGGGTCCGACGGGGCGTGTCTGGTGGGGCGGGAGCGGGGGCGCGCGGGAGCCTGCACCGCTTGGAGGGGAGAATGACAGGGGGCGGGGACAGAGAGCGGTGCGGCC      | 12 |
| GD1-169740-169860 | 25405384 | GTGGGGCGGGAGCGGGGGCGCGGGAGCCTGCACGCGCTTGGAGGGGAGAATGACAGGGGGCGGGGACAGAGAGCGGTGCGCCCCCGCGCGGCAAGCCCCGGGGGG               | 12 |
| GD1-169770-169890 | 25577042 | GCCTGCACGCCGTTGGAGGGGAGAATGACAGGGGGCGGGGACAGAGAGCGGTGCGCCCCCGCGCGCGCAAGCCCCGGGGGGCGGGGCGCGGGCGCGGAGCGTACGAAGG           | 12 |
| GD1-169800-169920 | 25748700 | GGGGGGCGGGACAGAGAGCGGTGCGCCCCCGCGCGCGCAGGCAAGCCCCGGGGGGCGGGGCGGGGCGCGGGAGCGTACGAAGGGCCCCAGGGCTGACCCCGCAACAGTGAAC        | 12 |
| GD1-170010-170130 | 25920358 | GGGGGGGGGGCGTGGGGCATGGGGGCGCATTCCTGGAAAAAGTGGAGGGGGCGTGGCCTGCCCGCGGGCCCCCTAGCCCCCGCACAGCGCGCGCAACGGCGGGCGGGCGGGG        | 12 |
| GD1-170190-170310 | 26092016 | GAAGGGGGGGTCCGGGGCGCGCGCCCCAGCCATGCGTGACCGCATGAGGGGACAGGGTGCAGGGGGCGTGTCTGGTGGGGCGGGAGCGGGGGCGCGCGGGAGCCTGCACG          | 12 |
| GD1-170220-170340 | 26263674 | CCAGCCATGCGTGACCGCATGAGGGGACAGGGTCCGAGGGGGCGTGTCTGGTGGGGCGGGAGCGGGGGCGCGCGGGAGCCTGCACGCGCTTGGAGGGGAGAATGACAGGGGGCGG     | 12 |
| GD1-170250-170370 | 26435332 | GGGTGCGAGGGGGCGTGTCTGGTGGGGCGGGAGCGGGGGCGCGCGGGAGCCTGCACGCGCTTGGAGGGGAGAATGACAGGGGGCGGGGACAGAGAGCGGTGCGCCCCCGGCCG       | 12 |
| GD1-170520-170640 | 26606990 | GGCCCCAGGAAAGACCCCGGGGGCATGGGGGCGCATTCTGGAAAAAGTGGAGGGGGCGTGGCTGCCCGCGGGCCCCCTAGCCCCCGCACAGCGCGCGCAACGGCGGGG            | 12 |
| GD1-170550-170670 | 26778648 | GGGGGCGCATTCTGGAAAAAGTGGAGGGGGCGTGGCCTGCCCGCGGGCCCCCTAGCCCCCGCACAGCGCGCGCAACGGCGGGCGGGGGGGTCCGGGTCGCGGGCTCC             | 12 |
| GD1-170700-170820 | 26950306 | GTTACAGGGAAAGGGGGGGTCCGGGGCGCGCGCCCCAGCCATGCGTGACCGCATGAGGGGACAGGGTGCAGGGGGCGTGTCTGGTGGGGCGGGAGCGGGGGCGCGCGGGAG         | 12 |
| GD1-170730-170850 | 27121964 | GCGCCCGCCAGCCATGCGTGACCGTATGAGGGGACAGGGTCCGAGGGGGCGTGTCTGGTGGGGCGGGAGCGGGGGCGCGCGGGAGCCTGCACGCGCTTGGAGGGGAGAATGACAG     | 8  |
| GD1-170760-170880 | 27293622 | AGGGGACAGGGTCCGAGGGGGCGTGTCTGGTGGGGCGGGAGCGGGGGCGCGCGGGAGCCTGCACGCGCTTGGAGGGGAGAATGACAGGGGGGGGGGACAGAGAGCGGTGCGCCCC     | 12 |
| GD1-170790-170910 | 27465280 | TGGGGCGGGAGCGGGGGCGCGCGCGCCGAGCCTGCACCGCTTGGAGGGGAGAATGACAGGGGGCGGGGACAGAGAGCGGTGCGCCCCCGCGCGGCAAGCCCCGGGGGG            | 12 |
| GD1-170820-170940 | 27636938 | CCTGCACGCCGTTGGAGGGGAGAATGACAGGGGGCGGGGACAGAGAGCGGTGCGCCCCCGCGCGCGCAGGCAAGCCCCGGGGGGCGGGGCGCGGGCCCGGAGCGTACGAAGGG       | 12 |
| GD1-170850-170970 | 27808596 | GGGGCGGGGACAGAGAGCGGTGCGCCCCCGCGCGCGCAGGCAAGCCCCGGGGGGCGGGGCGCGGGCCCGGAGCGTACGAAGGGCCCCAGGGCTGACCCCGCAACAGTGAAC         | 12 |
| GD1-170880-171000 | 27980254 | CCGGCCCGCGCAGGCAAGCCCCGGGGGGCGGGGCGCGGGCCCGGGAGCGTACGAAGGGCCCCAGGGCTGACCCCGGCAACAGTACCCGGGGTCCGGGGTACCCAGCCAAGCGTGA     | 12 |
| GD1-170910-171030 | 28151912 | GGGGCGGGCGCGGAGCGTACGAAGGGCCCCAGGGCTGACCCCGCAACAGTACCCGGGGTCCGGGGTACCCAGCCAAGCGTACCAAGGGGGCGCTGGGTGACACAGGCAACC         | 8  |
| GD1-171060-171180 | 28323570 | GGGGGGGGGCGTGGGGCATGGGGGCGCATTCTGGAAAAAGTGGAGGGGGCGTGGCCTGCCCGCGGGCCCCCTAGCCCCCGCACAGCGCGCGCAACGGCGGGCGGGGGGG           | 12 |
| GD1-171090-171210 | 28495228 | TTCTGGAAAAAGTGGAGGGGGCGTGGCCTGCCCGCGGGCCCCCTAGCCCCCGCACAGCGCGCGCAACGGCGGGCGGGGGGGTCCGGGGTCCGGGGTCCGGGGGCTCCGGGGGCTGC    | 12 |
| GD1-171240-171360 | 28666886 | AAGGGGGGGTCCGGGGCGCGCGCCCCAGCCATGCGTGACCGTATGAGGGGGAGGGTCCGAGGGGGTGTCTGGTGGGGCGGGAGCGGGGGCGGGCGGGGAGCCTGCACGC           | 12 |
| GD1-171420-171540 | 28838544 | GCAGGCAAGCCCCGGGGCGGGGCGCGGGCCCGGGAGCGTACGAAGGGCCCCAGGGCTGACCCCGGCAACAGTACCCGGGGTCCGGGGTACCCAGCCAAGCGTACCAAGGGG         | 12 |
| GD1-171450-171570 | 29010202 | GCCCGGAGCGTACGAAGGGCCCCAGGGCTGACCCCGCAACAGTACCCGGGGTCCGGGGTACCCAGCCAAGCGTACCAAGGGGGCGTGGGTGACACAGGCAACCTGACAAAG         | 8  |
| GD1-171537-171657 | 29181860 | GGCCCGTGGTACACAGGCAACCTGACAAAGGGCCCCAGGAAAGACCCCGGGGGGATCCGGGGGGTGTGGCGGGGGCATGGGGGGTCCGATTTCCGCTTATTGCCCTGTTT          | 8  |
| GD1-171537-171657 | 29353518 | GGCCCGTGGTACACAGGCAACCTGACAAAGGGCCCCAGGAAAGACCCCGGGGGGATCCGGGGGGTGTGGCGGGGGCATGGGGGGTCCGATTTCCGCTTATTGCCCTGTTT          | 8  |
